# Supplementary material for: Molecular subtypes based on DNA methylation predict prognosis in colon adenocarcinoma patients
Source: Aging (Albany NY). 2019 Dec 18;11(24):11880–92. doi: 10.18632/aging.102492 (PMC6949097; doi:10.18632/aging.102492)
Supplement: Supplementary Table 1 [file aging-11-102492-s007..xlsx]

## Sheet: S1_Table
Supplementary Table 1. The clinical information and follow-up data of 459 patients.
A0_Samples	A1_OS	A2_Event	A3_T	A4_N	A5_M	A6_Stage	additional_studies	additional_studies.additional_study.disease_code	additional_studies.additional_study.project_code	age_at_initial_pathologic_diagnosis	anatomic_neoplasm_subdivision	bcr_patient_barcode	bcr_patient_uuid	braf_gene_analysis_performed	braf_gene_analysis_result	circumferential_resection_margin	colon_polyps_present	day_of_form_completion	days_to_birth	days_to_death	days_to_initial_pathologic_diagnosis	days_to_last_followup	days_to_last_known_alive	drugs	drugs.drug.bcr_drug_barcode	drugs.drug.bcr_drug_uuid	drugs.drug.clinical_trail_drug_classification	drugs.drug.day_of_form_completion	drugs.drug.days_to_drug_therapy_end	drugs.drug.days_to_drug_therapy_start	drugs.drug.drug_name	drugs.drug.measure_of_response	drugs.drug.month_of_form_completion	drugs.drug.number_cycles	drugs.drug.prescribed_dose	drugs.drug.prescribed_dose_units	drugs.drug.regimen_indication	drugs.drug.regimen_indication_notes	drugs.drug.regimen_number	drugs.drug.route_of_administrations.route_of_administration	drugs.drug.therapy_ongoing	drugs.drug.therapy_types.therapy_type	drugs.drug.therapy_types.therapy_type_notes	drugs.drug.total_dose	drugs.drug.total_dose_units	drugs.drug.tx_on_clinical_trial	drugs.drug.year_of_form_completion	ethnicity	follow_ups
TCGA-A6-5666	995	Alive	T4b	N0	M0	Stage IIC				78	Sigmoid Colon	TCGA-A6-5666	25c3201a-3dd5-4edf-ad09-104e5c10663e	NO	Not Available	Not Available	NO	26	-28514	Not Applicable	0	244	Not Available																									NOT HISPANIC OR LATINO
TCGA-AA-3812	1066	Alive	T3	N0	M0	Stage IIA				82	Sigmoid Colon	TCGA-AA-3812	4563e4e0-a661-46de-ad25-9c86a621e147	NO	Not Available	Not Available	Not Available	18	-29980	Not Applicable	0	0	Not Available																									Not Available
TCGA-A6-5664	672	Alive	T4a	N2a	MX	Stage IIIC				80	Cecum	TCGA-A6-5664	f88c0259-58ff-4bcc-a777-7705cdbd8213	NO	Not Available	Not Available	YES	31	-29426	Not Applicable	0	362	Not Available		TCGA-A6-5664-D15804;TCGA-A6-5664-D15810;TCGA-A6-5664-D15776;TCGA-A6-5664-D15775;TCGA-A6-5664-D15809;TCGA-A6-5664-D15811;TCGA-A6-5664-D15774;TCGA-A6-5664-D15777;TCGA-A6-5664-D15812;TCGA-A6-5664-D33770;TCGA-A6-5664-D33771;TCGA-A6-5664-D33772;TCGA-A6-5664-D33773;TCGA-A6-5664-D33774	c3a8627d-8872-491d-a670-a382c96334f2;e2446b99-586f-4a4a-bdac-86b3baa79ee1;3b3a45ac-d472-4def-ba9b-d3b9b9b128ed;2e02ab32-cfd5-4435-9bbb-d0d5cd74e318;24d21731-0c40-44e8-8a1b-f6317f78b0d2;dc3ca0c7-d4f6-4569-9e6a-3ab0421a3c62;cee020b0-05cb-4773-86d0-24f266a4c239;fb3b27ca-4360-4a50-ba63-27801b3a2451;7cad8852-e503-4c95-a4f7-ca6c11e54542;3BA99B8C-D023-41EB-BD42-E479F3EBDEDF;07B9A3D8-5A9A-42A5-9C94-C102D…	Not Available;Not Available;Not Available;Not Available;Not Available;Not Available;Not Available;Not Available;Not Available;Not Available;Not Available;Not Available;Not Available;Not Available	1;1;31;31;1;1;31;31;1;16;16;16;16;16	Not Available;Not Available;275;273;Not Available;Not Available;273;259;Not Available;635;391;635;635;637	301;301;231;231;301;301;231;231;301;301;301;301;301;301	Irinotecan;Leucovorin;Fluorouracil;Leucovorin;Bevacizumab;Fluorouracil;Oxaliplatin;Bevacizumab;Fluorouracil;Irinotecan;Bevacizumab;Leucovorin;Fluorouracil;Fluorouracil	Not Available;Not Available;Not Available;Not Available;Not Available;Not Available;Not Available;Not Available;Not Available;Clinical Progressive Disease;Clinical Progressive Disease;Clinical Progressive Disease;Clinical Progressive Disease;Clinical Progressive Disease	9;9;8;8;9;9;8;8;9;7;7;7;7;7	4;4;4;4;1;4;4;3;4;Not Available;Not Available;Not Available;Not Available;Not Available	320-331;50-150;4392-4416;50-100;339;736;150;334-343;4416;Not Available;Not Available;Not Available;Not Available;Not Available	mg;mg;mg;mg;mg;mg;mg;mg;mg;Not Available;Not Available;Not Available;Not Available;Not Available	PALLIATIVE;PALLIATIVE;PALLIATIVE;PALLIATIVE;PALLIATIVE;PALLIATIVE;PALLIATIVE;PALLIATIVE;PALLIATIVE;Not Available;Not Available;Not Available;Not Available;Not Available	Not Applicable;Not Applicable;Not Applicable;Not Applicable;Not Applicable;Not Applicable;Not Applicable;Not Applicable;Not Applicable;Not Applicable;Not Applicable;Not Applicable;Not Applicable;Not Applicable	2;2;1;1;2;2;1;1;2;Not Available;Not Available;Not Available;Not Available;Not Available	IV;IV;IV;IV;IV;IV;IV;IV;IV;Not Available;Not Available;Not Available;Not Available;Not Available	YES;YES;NO;NO;YES;YES;NO;NO;YES;NO;NO;NO;NO;NO	Chemotherapy;Other, specify in notes;Chemotherapy;Other, specify in notes;Targeted Molecular therapy;Chemotherapy;Chemotherapy;Targeted Molecular therapy;Chemotherapy;Chemotherapy;Targeted Molecular therapy;Ancillary;Chemotherapy;Chemotherapy	Not Available;Ancillary;Not Available;Ancillary;Not Available;Not Available;Not Available;Not Available;Not Available;Not Available;Not Available;Not Available;Not Available;Not Available	1313;400;17664;300;339;2944;600;1016;17664;Not Available;Not Available;Not Available;Not Available;Not Available	mg;mg;mg;mg;mg;mg;mg;mg;mg;Not Available;Not Available;Not Available;Not Available;Not Available	Not Available;Not Available;Not Available;Not Available;Not Available;Not Available;Not Available;Not Available;Not Available;NO;NO;NO;NO;NO	2011;2011;2011;2011;2011;2011;2011;2011;2011;2012;2012;2012;2012;2012	NOT HISPANIC OR LATINO
TCGA-AA-A01Z	1126	Alive	T3	N0	M0	Stage II				68	Ascending Colon	TCGA-AA-A01Z	c9e829d9-cd08-41a9-a5a4-34f2d7d619c7	NO	Not Available	Not Available	Not Available	15	-24990	Not Applicable	0	0	Not Available																									Not Available
TCGA-AA-3846	518	Alive	T3	N0	M0	Stage IIA				74	Sigmoid Colon	TCGA-AA-3846	f2ef5afa-6191-43a1-a023-d53c0d985139	NO	Not Available	Not Available	Not Available	18	-27057	Not Applicable	0	31	Not Available																									Not Available
TCGA-NH-A6GB	476	Alive	T3	N2b	MX	Stage IIIC				71	Transverse Colon	TCGA-NH-A6GB	E3B0EE77-C419-4B2B-833F-90A221415489	NO	Not Available	25	NO	3	-26100	Not Applicable	0	170	Not Available		TCGA-NH-A6GB-D47966;TCGA-NH-A6GB-D47967;TCGA-NH-A6GB-D66874;TCGA-NH-A6GB-D66875	203963D4-D536-4882-BA73-DCE96465215E;9E5F85B5-470E-4515-8A6D-AE85BC318C71;8642643C-31FB-43C3-A3F7-CBDA20E6E9D8;BEFB19FB-01C4-46FB-AA30-1EC5EAE2D187	Not Available;Not Available;Not Available;Not Available	3;3;24;24	212;212;576;576	49;49;49;49	oxaliplatin;Bevacizumab;leucovorin;fluorouracil	Clinical Progressive Disease;Clinical Progressive Disease;Clinical Progressive Disease;Clinical Progressive Disease	9;9;10;10	Not Available;Not Available;Not Available;Not Available	Not Available;Not Available;Not Available;Not Available	Not Available;Not Available;Not Available;Not Available	Not Available;Not Available;Not Available;Not Available	Not Applicable;Not Applicable;Not Applicable;Not Applicable	Not Available;Not Available;Not Available;Not Available	Not Available;Not Available;Not Available;Not Available	NO;NO;NO;NO	Chemotherapy;Immunotherapy;Ancillary;Chemotherapy	Not Available;Not Available;Not Available;Not Available	Not Available;Not Available;Not Available;Not Available	Not Available;Not Available;Not Available;Not Available	NO;NO;NO;NO	2013;2013;2014;2014	NOT HISPANIC OR LATINO
TCGA-AA-3693	0	Alive	T4	N1	M1	Stage IV				77	Sigmoid Colon	TCGA-AA-3693	33522271-b2ca-4da4-a942-501ab9117c51	NO	Not Available	Not Available	Not Available	18	-28459	Not Applicable	0	0	Not Available																									Not Available
TCGA-CM-6677	337	Alive	T3	N0	M0	Stage IIA				75	Hepatic Flexure	TCGA-CM-6677	a85e8208-a6f5-4e91-8f35-ef574f4273fc	NO	Not Available	Not Available	YES	Not Available	-27575	Not Applicable	0	153	Not Available																									NOT HISPANIC OR LATINO
TCGA-D5-5539	596	Alive	T3	N1	M0	Stage IIIA				60	Ascending Colon	TCGA-D5-5539	15d1b0fb-5c5f-4689-94f5-b33120a2bfae	NO	Not Available	Not Available	Not Available	22	-22097	Not Applicable	0	30	Not Available		TCGA-D5-5539-D20730	cfa250cc-1c8d-4e9f-8385-fe6426cd2c8c	Not Available	19	195	38	5-FU	Not Available	1	9	Not Available	Not Available	ADJUVANT	Not Applicable	Not Available	IV	NO	Chemotherapy	Not Available	Not Available	Not Available	Not Available	2012	NOT HISPANIC OR LATINO
TCGA-CK-5913	1561	Alive	T3	N0	MX	Stage IIA				58	Cecum	TCGA-CK-5913	3758f4f7-ac2f-4f9d-bee2-526196f8129a	YES	Normal	2	NO	Not Available	-21399	Not Applicable	0	853	Not Available																									NOT HISPANIC OR LATINO
TCGA-AA-3710	821	Alive	T3	N0	M0	Stage IIA				80	Hepatic Flexure	TCGA-AA-3710	f5c3bc61-1018-4351-bb23-aacc1459365f	NO	Not Available	Not Available	Not Available	18	-29465	Not Applicable	0	31	Not Available																									Not Available
TCGA-CM-5349	915	Alive	T3	N0	M0	Stage IIA				68	Cecum	TCGA-CM-5349	227f945f-76fd-4a63-9609-d4e730a3d22a	NO	Not Available	Not Available	NO	3	-24867	Not Applicable	0	335	Not Available																									NOT HISPANIC OR LATINO
TCGA-CM-6172	335	Alive	T3	N1a	M0	Stage IIIB				70	Sigmoid Colon	TCGA-CM-6172	40c217ee-429f-41f4-adc6-db9186622b17	NO	Not Available	Not Available	NO	26	-25902	Not Applicable	0	212	Not Available		TCGA-CM-6172-D15207;TCGA-CM-6172-D15210;TCGA-CM-6172-D15211	1c92cd0a-a3ad-417d-b9f2-5ee194656f03;4ab077b9-0d4a-4eba-91a6-afb6b7dea381;fede8ba2-c2c4-4f42-93f9-5599ab87d56d	Not Available;Not Available;Not Available	15;15;15	245;245;245	89;89;89	Leucovorin;Fluorouracil;Fluorouracil	Not Available;Not Available;Not Available	8;8;8	12;12;12	700;700;2100	mg;mg;mg	ADJUVANT;ADJUVANT;ADJUVANT	Not Applicable;Not Applicable;Not Applicable	1;1;1	IV;IV;IV	NO;NO;NO	Other, specify in notes;Chemotherapy;Chemotherapy	Ancillary agent;Not Available;Not Available	6890;7950;24000	mg;mg;mg	Not Available;Not Available;Not Available	2011;2011;2011	NOT HISPANIC OR LATINO
TCGA-AA-3695	0	Alive	T3	N2	M1	Stage IV				63	Cecum	TCGA-AA-3695	23d0681a-912a-408f-b19a-0bbcf5ffc2f3	NO	Not Available	Not Available	Not Available	18	-23164	Not Applicable	0	0	Not Available																									Not Available
TCGA-D5-6920	377	Alive	T3	N0	M0	Stage IIA				77	Sigmoid Colon	TCGA-D5-6920	dc22eba5-6fb7-4875-b30a-99fa00758301	NO	Not Available	Not Available	NO	18	-28124	Not Applicable	0	112	Not Available																									NOT HISPANIC OR LATINO
TCGA-AZ-6606	357	Dead	T4	N2	M1	Stage IV				81	Cecum	TCGA-AZ-6606	c8d6fe73-3504-42a5-9723-e1916fba8208	Not Available	Not Available	Not Available	Not Available	2	-29704	357	0	Not Available	Not Available		TCGA-AZ-6606-D34173;TCGA-AZ-6606-D34174	911D9E4B-F7D6-4148-8474-7711805F5561;410BCD90-40D4-47F1-82A9-917465D28CD4	Not Available;Not Available	1;1	103;165	59;165	Folfiri;5 FU	Clinical Progressive Disease;Clinical Progressive Disease	8;8	Not Available;Not Available	Not Available;Not Available	Not Available;Not Available	Not Available;Not Available	Not Applicable;Not Applicable	Not Available;Not Available	Not Available;Not Available	NO;NO	Chemotherapy;Chemotherapy	Not Available;Not Available	Not Available;Not Available	Not Available;Not Available	NO;NO	2012;2012	NOT HISPANIC OR LATINO
TCGA-AA-3530	580	Alive	T2	N0	M0	Stage I				80	Cecum	TCGA-AA-3530	1ad0b9b9-7ded-4281-b114-9dcc6138c037	NO	Not Available	Not Available	Not Available	18	-29402	Not Applicable	0	0	Not Available																									Not Available
TCGA-CM-6163	427	Alive	T1	N0	M0	Stage I				74	Sigmoid Colon	TCGA-CM-6163	8c043ecd-2265-411f-bc3b-dc341cf56ac2	NO	Not Available	Not Available	YES	19	-27150	Not Applicable	0	90	Not Available																									NOT HISPANIC OR LATINO
TCGA-AA-A02Y	1216	Alive	T2	N0	M0	Stage I				73	Cecum	TCGA-AA-A02Y	a435fdf4-a89a-499e-9006-cbb5693eab26	NO	Not Available	Not Available	Not Available	15	-26724	Not Applicable	0	31	Not Available																									Not Available
TCGA-AZ-4323	43	Dead	T4	N2	M1	Stage IV				37	Cecum	TCGA-AZ-4323	c59d90a6-9cda-426d-b8ea-41f0a87033d5	Not Available	Not Available	Not Available	Not Available	31	-13755	43	0	Not Available	Not Available		TCGA-AZ-4323-D30624	d2b47817-125a-48ac-85c5-bda942ea8cb8	Not Available	13	Not Available	27	Oxaliplatin	Unknown	4	Not Available	Not Available	Not Available	Not Available	Not Applicable	Not Available	Not Available	NO	Chemotherapy	Not Available	Not Available	Not Available	NO	2012	NOT HISPANIC OR LATINO
TCGA-AZ-6598	1503	Dead	T3	N0	MX	Stage II				77	Discrepancy	TCGA-AZ-6598	a8b4284d-cbbb-43e3-897b-d04af4bfba74	Not Available	Not Available	Not Available	Not Available	29	-28182	1503	0	Not Available	Not Available																									NOT HISPANIC OR LATINO
TCGA-A6-5662	718	Alive	T3	N2	M1	Stage IVA				46	Splenic Flexure	TCGA-A6-5662	960d278c-c87d-42dc-ad28-42e010d8f0f1	NO	Not Available	Not Available	NO	2	-16873	Not Applicable	0	297	Not Available		TCGA-A6-5662-D18214;TCGA-A6-5662-D18219;TCGA-A6-5662-D18215;TCGA-A6-5662-D18217;TCGA-A6-5662-D18220;TCGA-A6-5662-D18218	bb925bf4-00b9-42dd-93aa-ee0576cc19ef;4ac04901-5785-41aa-9367-81ac00bfa8be;1caf1e4f-8aaa-43dc-9348-55b58fd5729e;ae0bab42-dcdf-4839-8310-26e7971cb270;00bf24a2-d995-4f9e-8c7f-8603f0c9c582;33f69924-19e0-446d-8b33-b9e5d327e610	Not Available;Not Available;Not Available;Not Available;Not Available;Not Available	8;8;8;8;8;8	368;395;395;395;487;397	60;60;60;60;426;60	Oxaliplatin;Bevacizumab;Fluorouracil;Leucovorin;Xeloda;Fluorouracil	Not Available;Not Available;Not Available;Not Available;Not Available;Not Available	11;11;11;11;11;11	12;23;23;23;3;23	143-171;389-436;487-804;50-100;3500- 4000;2923-4824	mg;mg;mg;mg;mg;mg	OTHER, SPECIFY IN NOTES;OTHER, SPECIFY IN NOTES;OTHER, SPECIFY IN NOTES;OTHER, SPECIFY IN NOTES;OTHER, SPECIFY IN NOTES;OTHER, SPECIFY IN NOTES	Metastatic;Metastatic;Metastatic;Metastatic;Metastatic;Metastatic	1;1;1;1;2;1	IV;IV;IV;IV;PO;IV	NO;NO;NO;NO;NO;NO	Chemotherapy;Targeted Molecular therapy;Chemotherapy;Other, specify in notes;Chemotherapy;Chemotherapy	Not Available;Not Available;Not Available;Ancillary;Not Available;Not Available	1977;9488;17194;1450;Not Available;101,059	mg;mg;mg;mg;mg;mg	Not Available;Not Available;Not Available;Not Available;Not Available;Not Available	2011;2011;2011;2011;2011;2011	NOT HISPANIC OR LATINO
TCGA-AA-A022	0	Alive	T4	N0	M0	Stage II				88	Cecum	TCGA-AA-A022	7a481097-14a3-4916-9632-d899c25fd284	NO	Not Available	Not Available	Not Available	15	-32446	Not Applicable	0	0	Not Available																									Not Available
TCGA-AA-3956	1035	Alive	T3	N0	M0	Stage IIA				65	Cecum	TCGA-AA-3956	7b47489f-c3cc-4388-b5d7-c7c02790a5f6	NO	Not Available	Not Available	Not Available	18	-24045	Not Applicable	0	0	Not Available																									Not Available
TCGA-AA-3525	1	Alive	T3	N1	M0	Stage IIIB				90	Hepatic Flexure	TCGA-AA-3525	b107565b-7558-4745-952b-689178367e1c	NO	Not Available	Not Available	Not Available	18	-32871	Not Applicable	0	0	Not Available																									Not Available
TCGA-DM-A0X9	3641	Alive	T3	N0	M0	Stage IIA				71	Discrepancy	TCGA-DM-A0X9	75ea63a9-357b-4566-bd78-eaa67809decd	YES	Normal	Not Available	YES	10	-26217	Not Applicable	0	3429	Not Available																									NOT HISPANIC OR LATINO
TCGA-AA-3510	1946	Alive	T3	N0	M0	Stage II				70	Transverse Colon	TCGA-AA-3510	35c295c2-37d1-44b2-87a3-1039645e5bae	NO	Not Available	Not Available	Not Available	18	-25902	Not Applicable	0	31	Not Available																									Not Available
TCGA-AZ-4308	3324	Alive	T3	N1	M0	Stage IIIB				47	Sigmoid Colon	TCGA-AZ-4308	3d8fd9b2-9aa2-4c81-8843-535ae66d6140	Not Available	Not Available	1	Not Available	11	-17321	Not Applicable	0	1715	Not Available		TCGA-AZ-4308-D20205;TCGA-AZ-4308-D31198;TCGA-AZ-4308-D72532	309da8a6-9b7a-4a25-b3cf-72f765484963;fb00dbc1-fe8e-499f-a828-6f339a1095ba;2D0F4E33-22EC-4990-80E0-158C353540BB	Not Available;Not Available;Not Available	6;25;11	196;191;196	53;50;53	Folinic acid;Avastin;Leucovorin	Not Available;Complete Response;Complete Response	1;4;7	6;Not Available;Not Available	Not Available;Not Available;Not Available	Not Available;Not Available;Not Available	ADJUVANT;Not Available;Not Available	Not Applicable;Not Applicable;Not Applicable	Not Available;Not Available;Not Available	IV;Not Available;Not Available	NO;NO;NO	Chemotherapy;Chemotherapy;Chemotherapy	Not Available;Not Available;Not Available	Not Available;Not Available;Not Available	Not Available;Not Available;Not Available	Not Available;NO;NO	2012;2012;2015	NOT HISPANIC OR LATINO
TCGA-AA-A01I	943	Alive	T2	N0	M0	Stage I				76	Sigmoid Colon	TCGA-AA-A01I	86d18004-9478-4e46-83b4-4fbe445ccb70	NO	Not Available	Not Available	Not Available	15	-27759	Not Applicable	0	31	Not Available																									Not Available
TCGA-CK-5914	669	Alive	T3	N1	MX	Stage IIIB				81	Sigmoid Colon	TCGA-CK-5914	57b0f89f-1b75-453e-922c-01cd4d44ca49	NO	Not Available	25	NO	Not Available	-29586	Not Applicable	0	669	Not Available																									NOT HISPANIC OR LATINO
TCGA-AA-3506	1765	Alive	T2	N0	M0	Stage I				77	Hepatic Flexure	TCGA-AA-3506	28033279-cc74-4775-afdf-2497f6ddb55c	NO	Not Available	Not Available	Not Available	18	-28275	Not Applicable	0	0	Not Available																									Not Available
TCGA-AA-3520	731	Alive	T3	N0	M0	Stage II				86	Ascending Colon	TCGA-AA-3520	5f1399ef-8100-49e7-806f-9f532e55c0ba	NO	Not Available	Not Available	Not Available	18	-31531	Not Applicable	0	0	Not Available																									Not Available
TCGA-CA-5255	376	Alive	T3	N0	M0	Stage IIA				45	Ascending Colon	TCGA-CA-5255	563d67a1-f1ba-4722-aa2d-9b35b1689468	Not Available	Not Available	Not Available	Not Available	8	-16743	Not Applicable	0	2	Not Available		TCGA-CA-5255-D70893;TCGA-CA-5255-D70894;TCGA-CA-5255-D70896	5BCC76C0-2AA1-4924-ABBC-BFEED0763489;E910330C-3E93-4D6E-9D24-CF762F6FEA96;F33C7ED2-B534-4BF8-9791-20E4CFC321B2	Not Available;Not Available;Not Available	10;10;10	331;331;331	164;164;164	oxaliplatin;5-Fluorouracil;Folinic Acid	Complete Response;Complete Response;Complete Response	3;3;3	Not Available;Not Available;Not Available	Not Available;Not Available;Not Available	Not Available;Not Available;Not Available	Not Available;Not Available;Not Available	Not Applicable;Not Applicable;Not Applicable	Not Available;Not Available;Not Available	Not Available;Not Available;Not Available	NO;NO;NO	Chemotherapy;Chemotherapy;Chemotherapy	Not Available;Not Available;Not Available	Not Available;Not Available;Not Available	Not Available;Not Available;Not Available	NO;NO;NO	2015;2015;2015	NOT HISPANIC OR LATINO
TCGA-AD-6964	331	Dead	T4a	N2b						58	Cecum	TCGA-AD-6964	5e7074a6-5011-4dc5-950c-41365dbc6d09	YES	Normal	0	NO	17	-21457	Not Applicable	0	23	Not Available		TCGA-AD-6964-D47096	80AE8305-E49C-40BD-A961-158C125E4D50	Not Available	22	214	63	Folfox	Clinical Progressive Disease	8	Not Available	Not Available	Not Available	Not Available	Not Applicable	Not Available	Not Available	NO	Chemotherapy	Not Available	Not Available	Not Available	NO	2013	NOT HISPANIC OR LATINO
TCGA-AA-3975	1036	Alive	T2	N0	M0	Stage I				80	Sigmoid Colon	TCGA-AA-3975	a9cb21d1-4c4a-4f30-ad4d-c54bed26f187	NO	Not Available	Not Available	Not Available	18	-29310	Not Applicable	0	30	Not Available																									Not Available
TCGA-CM-5864	457	Alive	T2	N0	M0	Stage I				60	Cecum	TCGA-CM-5864	5b259d18-3976-4f44-967f-fe5fa8447c8b	NO	Not Available	Not Available	NO	18	-22219	Not Applicable	0	61	Not Available																									NOT HISPANIC OR LATINO
TCGA-AA-3560	608	Alive	T3	N2	M0	Stage IIIC				72	Sigmoid Colon	TCGA-AA-3560	2d02bd7a-5beb-4e43-9ccb-18d89c9d5ca2	NO	Not Available	Not Available	Not Available	18	-26359	Not Applicable	0	0	Not Available		TCGA-AA-3560-D37463;TCGA-AA-3560-D37464;TCGA-AA-3560-D37465	03F2E068-151A-44F5-A6DD-2D04EC99B0BF;BADECE76-E2D5-4E8F-AA08-EFAF10FA5EAB;1791EB2A-6782-4676-B313-4B8F73B36DD0	Not Available;Not Available;Not Available	3;3;3	212;212;212	31;31;31	Folinic acid;5-Fluorouracil;Oxaliplatin	Complete Response;Complete Response;Complete Response	12;12;12	Not Available;Not Available;Not Available	Not Available;Not Available;Not Available	Not Available;Not Available;Not Available	Not Available;Not Available;Not Available	Not Applicable;Not Applicable;Not Applicable	Not Available;Not Available;Not Available	Not Available;Not Available;Not Available	NO;NO;NO	Chemotherapy;Chemotherapy;Chemotherapy	Not Available;Not Available;Not Available	Not Available;Not Available;Not Available	Not Available;Not Available;Not Available	NO;NO;NO	2012;2012;2012	Not Available
TCGA-G4-6320	804	Alive	T3	N1	MX	Stage III				73	Hepatic Flexure	TCGA-G4-6320	da21e143-dbf6-4ac7-8872-f1d9ae39512d	NO	Not Available	Not Available	YES	11	-26840	Not Applicable	0	678	Not Available		TCGA-G4-6320-D21911;TCGA-G4-6320-D21914;TCGA-G4-6320-D21913	cc241491-1bbe-4a4e-bce5-52b8b63d0f39;2b3677bc-4ef6-4226-ac39-22c5a2c4e2cd;536049c4-8854-4618-8702-adba0c21b59c	Not Available;Not Available;Not Available	30;30;30	145;209;209	41;41;41	Oxaliplatin;Leucovorin;Fluorouracil	Not Available;Not Available;Not Available	1;1;1	8;12;12	227;1068;400	mg;mg;mg/m2	ADJUVANT;ADJUVANT;ADJUVANT	Not Applicable;Not Applicable;Not Applicable	1;1;1	IV;IV;IV	NO;NO;NO	Chemotherapy;Chemotherapy;Chemotherapy	Not Available;Not Available;Not Available	1600;12816;4800	mg;mg;mg/m2	Not Available;Not Available;Not Available	2012;2012;2012	NOT HISPANIC OR LATINO
TCGA-AD-6890	746	Alive	T1	N0	MX					65	Ascending Colon	TCGA-AD-6890	e8e80df9-e3ba-4dec-b8fc-a5e80d8c6798	NO	Not Available	10	YES	22	-23769	Not Applicable	0	24	Not Available																									Not Available
TCGA-AA-3862	914	Alive	T3	N0	M0	Stage IIA				82	Transverse Colon	TCGA-AA-3862	05ff79c5-1127-4cac-8f4c-84089a3f2cde	NO	Not Available	Not Available	Not Available	18	-30163	Not Applicable	0	31	Not Available																									Not Available
TCGA-AA-3673	1522	Alive	T3	N0	M0	Stage II				53	Transverse Colon	TCGA-AA-3673	628408ce-0691-4e0b-b4c7-aca9a0d73bb0	NO	Not Available	Not Available	Not Available	18	-19509	Not Applicable	0	0	Not Available																									Not Available
TCGA-AA-3667	426	Alive	T2	N0	M0	Stage I				36	Sigmoid Colon	TCGA-AA-3667	d651f9ba-8746-46c4-852c-6c2992c7d10e	NO	Not Available	Not Available	Not Available	18	-13302	Not Applicable	0	0	Not Available																									Not Available
TCGA-AA-A024	1188	Dead	T3	N0	M0	Stage II				81	Descending Colon	TCGA-AA-A024	d4e1472a-7b5f-46f4-acb7-b961f634e28e	NO	Not Available	Not Available	Not Available	15	-29708	Not Applicable	0	61	Not Available																									Not Available
TCGA-G4-6317	1095	Alive	T3	N2	MX	Stage IIIC				51	Sigmoid Colon	TCGA-G4-6317	cee553c8-460d-436b-b55d-8f41624816cc	NO	Not Available	Not Available	NO	12	-18822	Not Applicable	0	894	Not Available		TCGA-G4-6317-D21906;TCGA-G4-6317-D21909;TCGA-G4-6317-D21907	4000a702-021c-48f2-bfa2-e3c52473cf59;f832e4e9-adbc-47e3-8ded-4aa8a47b947b;8a1ce59a-d27d-4bf6-b512-3c41d7ee9704	Not Available;Not Available;Not Available	30;30;30	201;201;201	47;47;47	Fluorouracil;Leucovorin;Oxaliplatin	Not Available;Not Available;Not Available	1;1;1	12;12;11	800;800;170	mg;mg;mg	ADJUVANT;ADJUVANT;ADJUVANT	Not Applicable;Not Applicable;Not Applicable	1;1;1	IV;IV;IV	NO;NO;NO	Chemotherapy;Other, specify in notes;Chemotherapy	Not Available;Ancillary;Not Available	9664;9600;1882	mg;mg;mg	Not Available;Not Available;Not Available	2012;2012;2012	NOT HISPANIC OR LATINO
TCGA-D5-7000	312	Alive	T2	N0	M0	Stage I				79	Cecum	TCGA-D5-7000	d5a296ae-c165-413c-adcc-33c9e99ff873	NO	Not Available	30	NO	18	-28913	Not Applicable	0	41	Not Available																									NOT HISPANIC OR LATINO
TCGA-CM-4744	609	Alive	T2	N0	M0	Stage I				69	Cecum	TCGA-CM-4744	cc15469c-7bad-4e86-9da3-ae0c72e9d380	NO	Not Available	Not Available	YES	24	-25506	Not Applicable	0	214	Not Available																									NOT HISPANIC OR LATINO
TCGA-F4-6704	47	Alive	T3	N2b	MX	Stage IIIC				60	Sigmoid Colon	TCGA-F4-6704	c6ed47f4-358b-4f06-b5cd-cdf1d5c47b43	NO	Not Available	Not Available	NO	25	-21949	Not Applicable	0	47	Not Available																									NOT HISPANIC OR LATINO
TCGA-DM-A1DB	1348	Dead	T3	N0	M0	Stage IIA				68	Sigmoid Colon	TCGA-DM-A1DB	d71ae66e-2c8a-4fd8-8b4b-a5a2d456a21d	YES	Normal	Not Available	Not Available	Not Available	-24888	1348	0	1348	1348																									NOT HISPANIC OR LATINO
TCGA-NH-A6GC	389	Alive	T4b	N1b	M1b	Stage IVB				66	Descending Colon	TCGA-NH-A6GC	0687BEA4-911A-4EF2-9FA2-531EF6BA7910	NO	Not Available	1	NO	3	-24355	Not Applicable	0	40	Not Available		TCGA-NH-A6GC-D60511;TCGA-NH-A6GC-D60512;TCGA-NH-A6GC-D60513	38D95D8B-82F3-487D-9992-7A0D08960E60;0FD6191F-0FF6-4426-8563-73D20C9BD713;072FE925-4152-4D53-82CE-09E9B5CC0652	Not Available;Not Available;Not Available	10;10;10	Not Available;Not Available;Not Available	186;186;186	fluorouracil;oxaliplatin;bevacizumab	Not Applicable;Not Applicable;Not Applicable	6;6;6	Not Available;Not Available;Not Available	Not Available;Not Available;Not Available	Not Available;Not Available;Not Available	Not Available;Not Available;Not Available	Not Applicable;Not Applicable;Not Applicable	Not Available;Not Available;Not Available	Not Available;Not Available;Not Available	YES;YES;YES	Chemotherapy;Chemotherapy;Immunotherapy	Not Available;Not Available;Not Available	Not Available;Not Available;Not Available	Not Available;Not Available;Not Available	NO;NO;NO	2014;2014;2014	NOT HISPANIC OR LATINO
TCGA-CK-4952	475	Alive	T4	N2	M0	Stage IIIC				48	Ascending Colon	TCGA-CK-4952	5342e2e8-1465-4f7b-9450-ef27280f80c7	NO	Not Available	21	NO	31	-17826	Not Applicable	0	475	Not Available																									NOT HISPANIC OR LATINO
TCGA-G4-6297	2506	Alive	T3	N2	M1	Stage IV				55	Cecum	TCGA-G4-6297	622cc1c4-d721-4b5c-a88b-216d6368660b	NO	Not Available	Not Available	YES	30	-20103	Not Applicable	0	2289	Not Available		TCGA-G4-6297-D22073;TCGA-G4-6297-D22080;TCGA-G4-6297-D22087;TCGA-G4-6297-D22074;TCGA-G4-6297-D22096;TCGA-G4-6297-D22071;TCGA-G4-6297-D22093;TCGA-G4-6297-D22076;TCGA-G4-6297-D22089;TCGA-G4-6297-D22079;TCGA-G4-6297-D22084;TCGA-G4-6297-D22086;TCGA-G4-6297-D22082;TCGA-G4-6297-D22097;TCGA-G4-6297-D22068	26aae8b9-b217-4ae4-84d2-20eb58eaa2b2;f0c7c99e-319d-4edb-b480-dd3e75e87b4e;25C9F9E7-35F7-4297-95CE-B9DAD4C1947F;6ab9bc08-f684-4502-8451-741d5a9dbff9;FEAAEA2D-1E20-4535-A045-B8681E6342A9;8425101a-756c-410d-81a8-2076b80de3bb;99251907-ED41-4F3E-B4C8-B927812A6053;991cc478-d3ed-4616-beae-0cc297dd9613;D9C655DD-4834-48B8-92CE-1F9B3F354760;c9ab9ffe-f904-4dfa-914c-0e8d4b3ed184;f7189321-dcef-43c0-9505-44974…	Not Available;Not Available;Not Available;Not Available;Not Available;Not Available;Not Available;Not Available;Not Available;Not Available;Not Available;Not Available;Not Available;Not Available;Not Available	19;19;19;19;19;19;19;19;19;19;19;19;19;19;19	103;1181;Not Available;103;Not Available;103;2373;726;1636;719;1181;1181;1076;2450;103	33;1041;1377;33;2450;33;1687;565;1377;565;1041;1041;1041;2450;33	Fluorouracil;Bevacizumab;Bevacizumab;Leucovorin;Oxaliplatin;Oxaliplatin;Irinotecan;Cetuximab;Xeloda;Irinotecan;Fluorouracil;Leucovorin;Oxaliplatin;Fluorouracil;Avastin	Not Available;Not Available;Not Available;Not Available;Not Available;Not Available;Not Available;Not Available;Not Available;Not Available;Not Available;Not Available;Not Available;Not Available;Not Available	1;1;1;1;1;1;1;1;1;1;1;1;1;1;1	Not Available;10;61;Not Available;4;Not Available;45;23;13;12;10;10;3;1;Not Available	400;445;712;400;168;85;300;760;3600;342;800;800;170;792;5	mg/m2;mg;mg;mg/m2;mg;mg/m2;mg;mg;mg/day;mg;mg;mg;mg;mg;mg/kg	ADJUVANT;RECURRENCE;PROGRESSION;ADJUVANT;PROGRESSION;ADJUVANT;PROGRESSION;PROGRESSION;PROGRESSION;PROGRESSION;PROGRESSION;RECURRENCE;PROGRESSION;PROGRESSION;ADJUVANT	Not Applicable;Not Applicable;Not Applicable;Not Applicable;Not Applicable;Not Applicable;Not Applicable;Not Applicable;Not Applicable;Not Applicable;Not Applicable;Not Applicable;Not Applicable;Not Applicable;Not Applicable	1;3;4;1;6;1;5;2;4;2;3;3;3;6;1	IV;IV;IV;IV;IV;IV;IV;IV;PO;IV;IV;IV;IV;IV;IV	NO;NO;YES;NO;YES;NO;NO;NO;NO;NO;NO;NO;NO;NO;NO	Chemotherapy;Chemotherapy;Chemotherapy;Chemotherapy;Chemotherapy;Chemotherapy;Chemotherapy;Chemotherapy;Chemotherapy;Chemotherapy;Chemotherapy;Chemotherapy;Chemotherapy;Chemotherapy;Chemotherapy	Not Available;Not Available;Not Available;Not Available;Not Available;Not Available;Not Available;Not Available;Not Available;Not Available;Not Available;Not Available;Not Available;Not Available;Not Available	Not Available;4310;30661;Not Available;630;Not Available;13386;11210;655200;4104;7900;7900;510;792;Not Available	Not Available;mg;mg;Not Available;mg;Not Available;mg;mg;mg;mg;mg;mg;mg;mg;Not Available	Not Available;Not Available;Not Available;Not Available;Not Available;Not Available;Not Available;Not Available;Not Available;Not Available;Not Available;Not Available;Not Available;Not Available;Not Available	2012;2012;2012;2012;2012;2012;2012;2012;2012;2012;2012;2012;2012;2012;2012	NOT HISPANIC OR LATINO
TCGA-G4-6302	0	Alive	T3	N0	M0	Stage IIA				90	Cecum	TCGA-G4-6302	7144a65f-a63f-4b79-8fe2-cfe48696de03	NO	Not Available	1	YES	5	-32872	Not Applicable	0	0	Not Available																									NOT HISPANIC OR LATINO
TCGA-CM-4750	244	Alive	T1	N1b	M0	Stage IIIA				34	Not Available	TCGA-CM-4750	c777a777-373a-4773-9566-6c373261f00a	NO	Not Available	4	YES	24	-12478	Not Applicable	0	244	Not Available		TCGA-CM-4750-D9917;TCGA-CM-4750-D9914;TCGA-CM-4750-D9915;TCGA-CM-4750-D9916	f1f12f68-b591-4801-b1a8-66c57856433c;52a49370-98c2-41f8-a0bf-4f67af1d0fae;0d015d60-0914-4165-8746-4ed9f2f0a395;0d47bdc8-bec1-4090-b4be-f7bfe1c3ea6a	Not Available;Not Available;Not Available;Not Available	17;17;17;17	210;168;210;210	49;49;49;49	Fluorouracil;Oxaliplatin;Leucovorin;Fluorouracil	Not Available;Not Available;Not Available;Not Available	1;1;1;1	11;9;12;12	2300-4650;80-165;40-770;400-750	mg;mg;mg;mg	ADJUVANT;ADJUVANT;ADJUVANT;ADJUVANT	Not Applicable;Not Applicable;Not Applicable;Not Applicable	1;1;1;1	IV;IV;IV;Intravesical	NO;NO;NO;NO	Chemotherapy;Chemotherapy;Other, specify in notes;Chemotherapy	Not Available;Not Available;Ancillary;Not Available	41450;1075;5690;6950	mg;mg;mg/day;mg	Not Available;Not Available;Not Available;Not Available	2011;2011;2011;2011	NOT HISPANIC OR LATINO
TCGA-CK-5916	643	Dead	T1	N0	M0	Stage I				71	Cecum	TCGA-CK-5916	38d65618-4857-490e-86b3-0a3f772a9f60	NO	Not Available	Not Available	NO	Not Available	-26024	643	0	Not Available	Not Available																									NOT HISPANIC OR LATINO
TCGA-AA-3856	30	Alive	T3	N0	M0	Stage IIA				59	Sigmoid Colon	TCGA-AA-3856	0b8de222-119a-40f3-8beb-12b9d933225b	NO	Not Available	Not Available	Not Available	18	-21670	Not Applicable	0	30	Not Available																									Not Available
TCGA-CM-6168	395	Alive	T3	N0	M0	Stage IIA				84	Ascending Colon	TCGA-CM-6168	75c3004d-1ef4-49f9-86e0-1bb7b9553a3d	NO	Not Available	Not Available	NO	19	-30834	Not Applicable	0	181	Not Available																									NOT HISPANIC OR LATINO
TCGA-AZ-6603	899	Dead	T2	N1	MX					77	Sigmoid Colon	TCGA-AZ-6603	56d5b0b9-9093-4286-a2c6-7faa9a1680f5	Not Available	Not Available	Not Available	Not Available	2	-28424	899	0	Not Available	Not Available																									NOT HISPANIC OR LATINO
TCGA-D5-6922	308	Alive	T3	N1	M0	Stage IIIA				76	Sigmoid Colon	TCGA-D5-6922	0a94eecf-4db2-4846-8383-c83ff02e4a9f	NO	Not Available	Not Available	NO	18	-27771	Not Applicable	0	134	Not Available																									NOT HISPANIC OR LATINO
TCGA-AA-3561	424	Alive	T3	N0	M0	Stage IIA				72	Ascending Colon	TCGA-AA-3561	01ad5016-f691-4bca-82a0-910429d8d25b	NO	Not Available	Not Available	Not Available	18	-26420	Not Applicable	0	0	Not Available																									Not Available
TCGA-AD-6548	650	Alive	T2	N0	M0	Stage I				81	Splenic Flexure	TCGA-AD-6548	c113808a-773f-4179-82d6-9083518404b5	Not Available	Not Available	4	YES	22	-29758	Not Applicable	0	3	Not Available																									NOT HISPANIC OR LATINO
TCGA-CM-5341	884	Alive	T2	N1a	M0	Stage IIIA				82	Sigmoid Colon	TCGA-CM-5341	2d3ce817-b269-4662-a92d-392bd3662399	NO	Not Available	Not Available	NO	10	-30163	Not Applicable	0	183	Not Available		TCGA-CM-5341-D5927;TCGA-CM-5341-D16156;TCGA-CM-5341-D16157	a7fd2c6d-39f7-4b7a-a2a0-1c7922e5fb77;929311bf-d001-4c25-8554-b7e6d5bb7f98;516885c2-a0e5-4bd5-ad56-d9d59a1c9a8a	Not Available;Not Available;Not Available	10;14;14	273;273;273	122;122;122	fluorouracil;fluorouracil;Leucovorin Calcium	Not Available;Not Available;Not Available	1;9;9	11;11;11	600;1700;600	mg;mg;mg	ADJUVANT;ADJUVANT;ADJUVANT	Not Applicable;Not Applicable;Not Applicable	1;1;1	IV;IV;IV	NO;NO;NO	Chemotherapy;Chemotherapy;Other, specify in notes	Not Available;Not Available;Ancillary	5900;16600;4580	mg;mg;mg	Not Available;Not Available;Not Available	2011;2011;2011	NOT HISPANIC OR LATINO
TCGA-AA-3842	1126	Alive	T2	N1	M0	Stage IIIA				51	Sigmoid Colon	TCGA-AA-3842	80311cf5-7e18-4545-92ad-c4b7dd5c9677	NO	Not Available	Not Available	Not Available	18	-18842	Not Applicable	0	31	Not Available		TCGA-AA-3842-D37475;TCGA-AA-3842-D37476;TCGA-AA-3842-D37477	ADAADEA5-5CC5-4AA4-BA47-150B275E7461;8940A6B1-1A17-428B-9929-BD7948D255D9;2CE1D74C-9405-46AD-BC26-F102D37AE18D	Not Available;Not Available;Not Available	3;3;3	212;212;212	59;59;59	Folinic acid;5-Fluorouracil;Oxaliplatin	Unknown;Unknown;Unknown	12;12;12	Not Available;Not Available;Not Available	Not Available;Not Available;Not Available	Not Available;Not Available;Not Available	Not Available;Not Available;Not Available	Not Applicable;Not Applicable;Not Applicable	Not Available;Not Available;Not Available	Not Available;Not Available;Not Available	NO;NO;NO	Chemotherapy;Chemotherapy;Chemotherapy	Not Available;Not Available;Not Available	Not Available;Not Available;Not Available	Not Available;Not Available;Not Available	NO;NO;NO	2012;2012;2012	Not Available
TCGA-AA-3977	761	Alive	T2	N0						65	Sigmoid Colon	TCGA-AA-3977	33e989b9-fac4-47d8-b429-269044ac772a	NO	Not Available	Not Available	Not Available	18	-23832	Not Applicable	0	31	Not Available																									Not Available
TCGA-CK-5915	0	Alive	T2	N0	MX	Stage I				63	Sigmoid Colon	TCGA-CK-5915	c658f35d-ceeb-4189-8e3d-03e3b9706667	NO	Not Available	Not Available	YES	Not Available	-23040	Not Applicable	0	0	Not Available																									NOT HISPANIC OR LATINO
TCGA-AA-3489	214	Dead	T3	N0	M0	Stage II				75	Sigmoid Colon	TCGA-AA-3489	b95720b1-aa00-4c6a-b202-3350d035829f	NO	Not Available	Not Available	Not Available	18	-27606	Not Applicable	0	31	Not Available																									Not Available
TCGA-A6-2680	1068	Alive	T3	N0	M0	Stage II				72	Hepatic Flexure	TCGA-A6-2680	ff1407c6-9174-4bae-a19b-d34ca71b898c	NO	Not Available	Not Available	NO	19	-26533	Not Applicable	0	522	Not Available																									NOT HISPANIC OR LATINO
TCGA-CM-4746	1126	Alive	T2	N0	M0	Stage I				61	Sigmoid Colon	TCGA-CM-4746	c0b8c55c-b993-481d-aeea-9ebfa64ee20e	NO	Not Available	Not Available	YES	10	-22403	Not Applicable	0	699	Not Available																									NOT HISPANIC OR LATINO
TCGA-AA-3696	153	Dead	T3	N1	M1	Stage IV				75	Sigmoid Colon	TCGA-AA-3696	aa909ffb-03e1-4e3f-8888-2212b23d90b7	NO	Not Available	Not Available	YES	18	-27667	Not Applicable	0	0	Not Available																									Not Available
TCGA-AA-3968	669	Alive	T2	N0	M0	Stage I				55	Sigmoid Colon	TCGA-AA-3968	cab7bdbc-0a11-4901-97c3-26b884f79cb5	NO	Not Available	Not Available	Not Available	18	-20089	Not Applicable	0	0	Not Available																									Not Available
TCGA-CM-5344	670	Alive	T3	N1b	M0	Stage IIIB				39	Sigmoid Colon	TCGA-CM-5344	b6202d8d-dd3c-4fa2-9242-6e55759846af	NO	Not Available	Not Available	YES	3	-14426	Not Applicable	0	304	Not Available		TCGA-CM-5344-D15264;TCGA-CM-5344-D15259;TCGA-CM-5344-D15262;TCGA-CM-5344-D15261;TCGA-CM-5344-D15260;TCGA-CM-5344-D15263	a3bae552-da95-42e8-b17c-c73532e66b4d;06418df1-95ee-4f7e-ac89-3b3af2d0490a;d4db4d65-33e4-4814-99eb-8354ca36eeca;82888328-8e75-4806-a3b5-fa5170d5a665;983af547-6cba-4e7d-a1c7-2ca7836f519c;c73bd755-af7e-413c-8d7d-ccd715806859	Not Available;Not Available;Not Available;Not Available;Not Available;Not Available	15;15;15;15;15;15	217;215;229;229;229;81	91;68;68;68;68;81	Pegfilgrastim (Peg G-CSF);Oxaliplatin;Fluorouracil;Fluorouracil;Leucovorin;Filgrastim (G-CSF)	Not Available;Not Available;Not Available;Not Available;Not Available;Not Available	8;8;8;8;8;8	10;11;12;12;12;1	6;140;2000;650;650;300	mg;mg;mg;mg;mg;ug	ADJUVANT;ADJUVANT;ADJUVANT;ADJUVANT;ADJUVANT;ADJUVANT	Not Applicable;Not Applicable;Not Applicable;Not Applicable;Not Applicable;Not Applicable	1;1;1;1;1;1	SC;IV;IV;IV;IV;SC	NO;NO;NO;NO;NO;NO	Other, specify in notes;Chemotherapy;Chemotherapy;Chemotherapy;Other, specify in notes;Other, specify in notes	Ancillary agent;Not Available;Not Available;Not Available;Ancillary agent;Ancillary agent	60;1540;23900;7800;6340;300	mg;mg;mg;mg;mg;ug	Not Available;Not Available;Not Available;Not Available;Not Available;Not Available	2011;2011;2011;2011;2011;2011	HISPANIC OR LATINO
TCGA-G4-6321	672	Alive	T2	N1	MX	Stage III				60	Cecum	TCGA-G4-6321	e7dbfca1-9657-4952-8e0d-dec6373dda5b	NO	Not Available	110	YES	13	-21921	Not Applicable	0	572	Not Available		TCGA-G4-6321-D21918;TCGA-G4-6321-D21919;TCGA-G4-6321-D21917	939cf32b-c067-4fe7-b0d4-5ab549c56393;cdfb2842-633d-48b2-8a2b-47d9c6ffa86e;2de2d207-7fac-4c6a-b0b3-57c575eff4f3	Not Available;Not Available;Not Available	30;30;22	257;257;243	103;103;103	Fluorouracil;Leucovorin;Oxaliplatin	Not Available;Not Available;Not Available	1;1;2	12;12;11	824;824;175	mg;mg;mg	ADJUVANT;ADJUVANT;ADJUVANT	Not Applicable;Not Applicable;Not Applicable	1;1;1	IV;IV;IV	NO;NO;NO	Chemotherapy;Chemotherapy;Chemotherapy	Not Available;Not Available;Not Available	9680;9680;1890	mg;mg;mg	Not Available;Not Available;Not Available	2012;2012;2012	NOT HISPANIC OR LATINO
TCGA-AA-3994	822	Alive	T3	N1	M0	Stage IIIB				69	Transverse Colon	TCGA-AA-3994	750770db-53cf-4021-a8c2-5e0ddb97fef5	NO	Not Available	Not Available	Not Available	18	-25323	Not Applicable	0	0	Not Available		TCGA-AA-3994-D37439	09F57FC8-2E45-4B15-83F1-490E1762A214	Not Available	3	334	30	Capecitabine	Complete Response	12	Not Available	Not Available	Not Available	Not Available	Not Applicable	Not Available	Not Available	NO	Chemotherapy	Not Available	Not Available	Not Available	NO	2012	Not Available
TCGA-A6-6650	627	Alive	T3	N0	M0	Stage IIA		FPPP	TCGA	69	Discrepancy	TCGA-A6-6650	6cd8d2dd-5545-43b0-b796-ae0506d62eb8	NO	Not Available	Not Available	NO	20	-25516	Not Applicable	0	173	Not Available																									NOT HISPANIC OR LATINO
TCGA-G4-6303	2003	Dead	T3	N1	M1	Stage IV				54	Sigmoid Colon	TCGA-G4-6303	264c0d45-078a-4207-a101-71f99bcd237e	NO	Not Available	Not Available	YES	1	-19800	Not Applicable	0	1882	Not Available		TCGA-G4-6303-D21602;TCGA-G4-6303-D21722;TCGA-G4-6303-D21793;TCGA-G4-6303-D21603;TCGA-G4-6303-D21789;TCGA-G4-6303-D21600;TCGA-G4-6303-D21604;TCGA-G4-6303-D21727;TCGA-G4-6303-D21794;TCGA-G4-6303-D21605;TCGA-G4-6303-D21717;TCGA-G4-6303-D21790;TCGA-G4-6303-D21725;TCGA-G4-6303-D21720;TCGA-G4-6303-D21601	d5338126-8849-4359-bd0e-9639362668d3;8513635f-8463-49de-83f2-6c54d479b728;57D9E884-76A1-4676-9427-18237D676857;57970f69-f63f-427e-bf68-86d90b0f5ac8;c92c9a04-8347-4909-960b-0f4878f27b08;30f4a7a0-2e8d-4001-b5ff-cc4797c7fd66;469d1453-719a-4bec-bf80-abd497cca359;d26c7bb7-87f7-4960-9ed4-8ef58ac71e95;5CEB94A7-D009-4796-A6B3-E5D560CC9B81;7a35095d-25fa-4780-95aa-88c2c4032d95;34bd5fb4-ebfa-4d5b-9ae9-96be7…	Not Available;Not Available;Not Available;Not Available;Not Available;Not Available;Not Available;Not Available;Not Available;Not Available;Not Available;Not Available;Not Available;Not Available;Not Available	23;23;23;23;23;23;23;23;23;23;23;23;23;23;23	682;1596;1994;1443;1994;682;1443;1838;1994;1443;1596;1994;1838;1596;682	516;1443;1840;896;1840;516;896;1596;1840;896;1443;1840;1596;1443;516	5-FU;5-FU;Leucovorin;Avastin;Oxaliplatin;Leucovorin;Leucovorin;Irinotecan;5-FU;5-FU;Leucovorin;Bevacizumab;Erbitux;Irinotecan;Oxaliplatin	Not Available;Not Available;Not Available;Not Available;Not Available;Not Available;Not Available;Not Available;Not Available;Not Available;Not Available;Not Available;Not Available;Not Available;Not Available	1;1;1;1;1;1;1;1;1;1;1;1;1;1;1	6;Not Available;10;Not Available;10;6;Not Available;12;10;Not Available;Not Available;10;12;Not Available;6	660;Not Available;680;Not Available;145;660;Not Available;Not Available;Not Available;Not Available;Not Available;325;Not Available;Not Available;165	mg;Not Available;mg;Not Available;mg;mg;Not Available;Not Available;Not Available;Not Available;Not Available;mg;Not Available;Not Available;mg	PROGRESSION;PROGRESSION;PROGRESSION;PROGRESSION;PROGRESSION;PROGRESSION;PROGRESSION;PROGRESSION;PROGRESSION;PROGRESSION;PROGRESSION;PROGRESSION;PROGRESSION;PROGRESSION;PROGRESSION	Not Applicable;Not Applicable;Not Applicable;Not Applicable;Not Applicable;Not Applicable;Not Applicable;Not Applicable;Not Applicable;Not Applicable;Not Applicable;Not Applicable;Not Applicable;Not Applicable;Not Applicable	1;3;5;2;5;1;2;4;5;2;3;5;4;3;1	IV;Not Available;IV;Not Available;IV;IV;Not Available;Not Available;IV;Not Available;Not Available;IV;Not Available;Not Available;IV	NO;NO;NO;NO;NO;NO;NO;NO;NO;NO;NO;NO;NO;NO;NO	Chemotherapy;Chemotherapy;Chemotherapy;Chemotherapy;Chemotherapy;Chemotherapy;Chemotherapy;Chemotherapy;Chemotherapy;Chemotherapy;Chemotherapy;Chemotherapy;Chemotherapy;Chemotherapy;Chemotherapy	Not Available;Not Available;Not Available;Not Available;Not Available;Not Available;Not Available;Not Available;Not Available;Not Available;Not Available;Not Available;Not Available;Not Available;Not Available	3960;Not Available;6790;Not Available;1450;3960;Not Available;Not Available;Not Available;Not Available;Not Available;3240;Not Available;Not Available;990	mg;Not Available;mg;Not Available;mg;mg;Not Available;Not Available;Not Available;Not Available;Not Available;mg;Not Available;Not Available;mg	Not Available;Not Available;Not Available;Not Available;Not Available;Not Available;Not Available;Not Available;Not Available;Not Available;Not Available;Not Available;Not Available;Not Available;Not Available	2012;2012;2012;2012;2012;2012;2012;2012;2012;2012;2012;2012;2012;2012;2012	NOT HISPANIC OR LATINO
TCGA-F4-6854	16	Alive	T3	N0	M0	Stage IIA				77	Sigmoid Colon	TCGA-F4-6854	01240896-3f3f-4bf9-9799-55c87bfacf36	NO	Not Available	Not Available	NO	7	-28272	Not Applicable	0	16	Not Available																									NOT HISPANIC OR LATINO
TCGA-A6-2675	1321	Alive	T3	N0	MX	Stage IIA				78	Sigmoid Colon	TCGA-A6-2675	07dc5a1d-64b7-42ba-928e-9753bd533c1e	NO	Not Available	Not Available	NO	30	-28813	Not Applicable	0	515	Not Available																									NOT HISPANIC OR LATINO
TCGA-CM-6171	427	Alive	T2	N0	M0	Stage I				77	Ascending Colon	TCGA-CM-6171	eed7405f-f8f3-41a4-a0e7-242f23087f59	NO	Not Available	Not Available	NO	19	-28307	Not Applicable	0	182	Not Available																									NOT HISPANIC OR LATINO
TCGA-AA-3966	61	Alive	T3	N0	M0	Stage IIA				89	Hepatic Flexure	TCGA-AA-3966	bc42fe2d-1a33-428d-a601-b1871f4c8d9b	NO	Not Available	Not Available	Not Available	18	-32537	Not Applicable	0	61	Not Available																									Not Available
TCGA-AA-3543	30	Alive	T2	N0	M0	Stage I				84	Cecum	TCGA-AA-3543	912b61a1-6a5b-451c-b753-9c3dac03e8cb	NO	Not Available	Not Available	Not Available	18	-30772	Not Applicable	0	0	Not Available																									Not Available
TCGA-F4-6570	188	Dead	T3	N0	M0	Stage IIA				78	Transverse Colon	TCGA-F4-6570	eeb42912-0c7a-46bb-bd95-369b2b425727	NO	Not Available	Not Available	Not Available	20	-28772	Not Applicable	0	0	Not Available																									NOT HISPANIC OR LATINO
TCGA-AZ-6607	97	Dead	T4	N2	M1	Stage IV				69	Sigmoid Colon	TCGA-AZ-6607	64dcf1a5-c78c-4d3f-852c-15865b3b6189	Not Available	Not Available	Not Available	Not Available	2	-25448	97	0	Not Available	Not Available																									NOT HISPANIC OR LATINO
TCGA-CM-6166	669	Alive	T2	N0	M0	Stage I				48	Ascending Colon	TCGA-CM-6166	aedde4a5-6520-40b9-9721-c9b826490b7a	NO	Not Available	Not Available	NO	19	-17807	Not Applicable	0	424	Not Available																									NOT HISPANIC OR LATINO
TCGA-T9-A92H	362	Alive	T3	N0	M0	Stage IIA				82	Sigmoid Colon	TCGA-T9-A92H	81A7184E-F9F5-4E3F-9603-5F5642386C1E	NO	Not Available	53	NO	30	-30058	Not Applicable	0	0	Not Available																									NOT HISPANIC OR LATINO
TCGA-AA-3972	1551	Alive	T3	N1	M1	Stage IV				72	Sigmoid Colon	TCGA-AA-3972	93cd5d07-e0d3-40f8-ae7f-beadb1efb7c1	NO	Not Available	Not Available	Not Available	18	-26360	Not Applicable	0	0	Not Available		TCGA-AA-3972-D37426;TCGA-AA-3972-D37427;TCGA-AA-3972-D37428;TCGA-AA-3972-D37429;TCGA-AA-3972-D37430;TCGA-AA-3972-D37431	45D2A60B-C35E-4BAC-9769-B1D5C0153FED;2DAFDB28-A410-42B2-AF63-E120355C65F7;DB748C7A-3F23-4440-959F-0652EF839B25;96844749-3509-4378-99E8-349FDEC7EFE8;A6074E5B-5C69-431C-837C-BFE344753B77;D468F9E0-47B4-4132-AD13-0ABB40C4E310	Not Available;Not Available;Not Available;Not Available;Not Available;Not Available	3;3;3;3;3;3	1246;1246;1369;1369;1369;1369	60;60;1277;1277;1277;1246	Capecitabine;Oxaliplatin;Folinic acid;5-Fluoruoracil;Oxaliplatin;Bevacizumab	Clinical Progressive Disease;Clinical Progressive Disease;Clinical Progressive Disease;Clinical Progressive Disease;Clinical Progressive Disease;Clinical Progressive Disease	12;12;12;12;12;12	Not Available;Not Available;Not Available;Not Available;Not Available;Not Available	Not Available;Not Available;Not Available;Not Available;Not Available;Not Available	Not Available;Not Available;Not Available;Not Available;Not Available;Not Available	Not Available;Not Available;Not Available;Not Available;Not Available;Not Available	Not Applicable;Not Applicable;Not Applicable;Not Applicable;Not Applicable;Not Applicable	Not Available;Not Available;Not Available;Not Available;Not Available;Not Available	Not Available;Not Available;Not Available;Not Available;Not Available;Not Available	NO;NO;NO;NO;NO;NO	Chemotherapy;Chemotherapy;Chemotherapy;Chemotherapy;Chemotherapy;Targeted Molecular therapy	Not Available;Not Available;Not Available;Not Available;Not Available;Not Available	Not Available;Not Available;Not Available;Not Available;Not Available;Not Available	Not Available;Not Available;Not Available;Not Available;Not Available;Not Available	NO;NO;NO;NO;NO;NO	2012;2012;2012;2012;2012;2012	Not Available
TCGA-AD-6895	763	Alive	T3	N1a	M0	Stage IIIB				84	Cecum	TCGA-AD-6895	4f601d7b-8db1-4c6d-9374-21dcd804980d	NO	Not Available	1	NO	22	-30879	Not Applicable	0	22	Not Available																									NOT HISPANIC OR LATINO
TCGA-F4-6808	1024	Alive	T1	N0	M0	Stage I				54	Sigmoid Colon	TCGA-F4-6808	4a785dc7-f5f6-4607-a19d-e6354b2fb5a9	NO	Not Available	Not Available	NO	31	-19803	Not Applicable	0	14	Not Available																									NOT HISPANIC OR LATINO
TCGA-AA-3544	426	Alive	T2	N0	M0	Stage I				68	Sigmoid Colon	TCGA-AA-3544	e831369c-78c0-4c75-9cf3-f46ed669312e	NO	Not Available	Not Available	Not Available	18	-24959	Not Applicable	0	0	Not Available																									Not Available
TCGA-D5-6540	491	Alive	T2	N0	M0	Stage I				66	Cecum	TCGA-D5-6540	b08b5f49-9434-4653-9772-097ec29b2ca3	Not Available	Not Available	Not Available	YES	16	-24282	Not Applicable	0	186	Not Available																									NOT HISPANIC OR LATINO
TCGA-AD-6901	682	Dead	T3	N0	MX					78	Cecum	TCGA-AD-6901	b76d1de7-6447-474d-bf67-77e0bb2da73a	NO	Not Available	1	NO	25	-28579	Not Applicable	0	31	Not Available		TCGA-AD-6901-D47119	CCB03758-E07C-42D8-B066-C6C9C73796AC	Not Available	22	214	61	Xeloda	Complete Response	8	Not Available	Not Available	Not Available	Not Available	Not Applicable	Not Available	Not Available	NO	Chemotherapy	Not Available	Not Available	Not Available	NO	2013	Not Available
TCGA-A6-2683	504	Dead	T4	N0	M1	Stage IV				57	Ascending Colon	TCGA-A6-2683	fafd4576-0709-49e1-926f-ad1ee09907ec	NO	Not Available	Not Available	NO	18	-20871	Not Applicable	0	472	Not Available		TCGA-A6-2683-D4970;TCGA-A6-2683-D4959;TCGA-A6-2683-D4967;TCGA-A6-2683-D4963;TCGA-A6-2683-D4964;TCGA-A6-2683-D4968;TCGA-A6-2683-D4966;TCGA-A6-2683-D4960;TCGA-A6-2683-D4961;TCGA-A6-2683-D4969;TCGA-A6-2683-D4962	e3bedc74-6ed7-4959-8d5c-fb6ccfc417a5;dfdef027-98d3-4ae2-82b7-d26157156291;b7e6fdf1-0994-4881-8f03-6dcd65d58c18;da116895-1b80-4709-94ed-70230241fc46;055caca7-c379-485e-8fa9-9f66029b7acb;62e33cf5-3a37-43dc-8fdb-c2258a9c910b;616c70ed-f4d1-4ac8-bcd5-95fb57094d0a;0b8a83b5-8223-41a9-b90f-e9b2b1a54ae8;8e1fe263-78d0-40af-a3a7-8cb7a9185893;6a41add5-5273-4d56-b4b0-6b9065dd9ddf;1f797061-446e-4ba7-8117-30d48…	Not Available;Not Available;Not Available;Not Available;Not Available;Not Available;Not Available;Not Available;Not Available;Not Available;Not Available	18;18;18;18;18;18;18;18;18;18;18	443;287;350;287;350;352;350;287;287;350;289	443;48;322;105;322;322;322;48;48;322;48	Mitomycin C;Irinotecan;Leucovorin;Avastin;Oxaliplatin;5 FU;5 FU;5 FU;Levcovorin;Avastin;5 FU	Not Available;Not Available;Not Available;Not Available;Not Available;Not Available;Not Available;Not Available;Not Available;Not Available;Not Available	10;10;10;10;10;10;10;10;10;10;10	1;12;3;12;3;3;3;16;16;3;16	16;300;650;275;140;3950;650;625;625;300;4000	mg;mg;mg;mg;mg;mg;mg;mg;mg;mg;mg	PROGRESSION;ADJUVANT;PROGRESSION;ADJUVANT;PROGRESSION;PROGRESSION;PROGRESSION;ADJUVANT;ADJUVANT;PROGRESSION;ADJUVANT	Not Applicable;Not Applicable;Not Applicable;Not Applicable;Not Applicable;Not Applicable;Not Applicable;Not Applicable;Not Applicable;Not Applicable;Not Applicable	3;1;2;1;2;2;2;1;1;2;1	IV;IV;IV;IV;IV;Not Available;IV;IV;IV;IV;Not Available	NO;NO;NO;NO;NO;NO;NO;NO;NO;NO;NO	Chemotherapy;Chemotherapy;Other, specify in notes;Targeted Molecular therapy;Chemotherapy;Chemotherapy;Chemotherapy;Chemotherapy;Other, specify in notes;Targeted Molecular therapy;Chemotherapy	Not Available;Not Available;Ancillary Agent;Not Available;Not Available;Not Available;Not Available;Not Available;Ancillary;Not Available;Not Available	16;3365;1950;3210;420;11850;1950;10050;10050;900;60525	mg;mg;mg;mg;mg;mg;mg;mg;mg;mg;mg	Not Available;Not Available;Not Available;Not Available;Not Available;Not Available;Not Available;Not Available;Not Available;Not Available;Not Available	2010;2010;2010;2010;2010;2010;2010;2010;2010;2010;2010	NOT HISPANIC OR LATINO
TCGA-D5-6927	287	Alive	T3	N0	M0	Stage IIA				34	Transverse Colon	TCGA-D5-6927	a782f174-241d-42c6-9bc4-61cc39f8b397	NO	Not Available	13	NO	18	-12737	Not Applicable	0	67	Not Available																									NOT HISPANIC OR LATINO
TCGA-AA-A004	424	Alive	T3	N0	M0	Stage IIA				76	Sigmoid Colon	TCGA-AA-A004	d2c99bed-3446-4d12-99e0-00611faa37dc	NO	Not Available	Not Available	Not Available	15	-27943	Not Applicable	0	31	Not Available																									Not Available
TCGA-G4-6627	2175	Alive	T3	N0	M0	Stage IIA				84	Ascending Colon	TCGA-G4-6627	19089ae0-b590-4649-9d94-a147fa506e32	NO	Not Available	6	YES	14	-30697	Not Applicable	0	1434	Not Available																									NOT HISPANIC OR LATINO
TCGA-DM-A1D0	3974	Alive	T3	N0	M0	Stage IIA				79	Sigmoid Colon	TCGA-DM-A1D0	1b0b0533-7c4f-4edd-a75e-8b56f49d54ab	YES	Normal	Not Available	Not Available	Not Available	-28875	Not Applicable	0	3625	3625																									NOT HISPANIC OR LATINO
TCGA-G4-6295	254	Alive	T3	N0	M0	Stage II				70	Cecum	TCGA-G4-6295	e17959bd-045d-4540-b43a-c3863e8ff3c0	NO	Not Available	Not Available	YES	28	-25758	Not Applicable	0	254	Not Available																									NOT HISPANIC OR LATINO
TCGA-NH-A50U	334	Dead	T4a	N0	M1a	Stage IVA				42	Cecum	TCGA-NH-A50U	9D68516E-7E5C-403E-8ACA-EA1ABE0D6014	NO	Not Available	5	YES	8	-15450	334	0	Not Available	Not Available		TCGA-NH-A50U-D55540;TCGA-NH-A50U-D55541;TCGA-NH-A50U-D55542;TCGA-NH-A50U-D55544;TCGA-NH-A50U-D55545;TCGA-NH-A50U-D55546;TCGA-NH-A50U-D55547	7EC61416-55CA-4A5A-8732-EAFED12F5DBC;1E720CC7-E366-4CE8-9105-592433C65063;5DC389D6-7100-4C95-9EEA-2FAEC49C30E9;BC6D54D8-A6D1-46EA-B3C9-6672E953FD2D;BAE5FBCF-0997-4137-9D72-74785EBD0A67;82B8C7FF-E00A-425B-8E6C-831795E65E18;AE3FD02D-394D-4F6E-8768-2E54B0E05B02	Not Available;Not Available;Not Available;Not Available;Not Available;Not Available;Not Available	8;8;8;8;8;8;8	189;189;266;266;253;113;Not Available	21;21;21;21;238;98;280	leucovorin calcium;oxaliplatin;bevacizumab;fluorouracil;avastin;capecitabine;regorafenib	Partial Response;Partial Response;Clinical Progressive Disease;Clinical Progressive Disease;Clinical Progressive Disease;Clinical Progressive Disease;Clinical Progressive Disease	1;1;1;1;1;1;1	Not Available;Not Available;Not Available;Not Available;Not Available;Not Available;Not Available	Not Available;Not Available;Not Available;Not Available;Not Available;Not Available;Not Available	Not Available;Not Available;Not Available;Not Available;Not Available;Not Available;Not Available	Not Available;Not Available;Not Available;Not Available;Not Available;Not Available;Not Available	Not Applicable;Not Applicable;Not Applicable;Not Applicable;Not Applicable;Not Applicable;Not Applicable	Not Available;Not Available;Not Available;Not Available;Not Available;Not Available;Not Available	Not Available;Not Available;Not Available;Not Available;Not Available;Not Available;Not Available	NO;NO;NO;NO;NO;NO;NO	Ancillary;Chemotherapy;Chemotherapy;Chemotherapy;Immunotherapy;Chemotherapy;Chemotherapy	Not Available;Not Available;Not Available;Not Available;Not Available;Not Available;Not Available	Not Available;Not Available;Not Available;Not Available;Not Available;Not Available;Not Available	Not Available;Not Available;Not Available;Not Available;Not Available;Not Available;Not Available	NO;NO;NO;NO;NO;NO;NO	2014;2014;2014;2014;2014;2014;2014	NOT HISPANIC OR LATINO
TCGA-AA-3509	1915	Alive	T3	N0	M0	Stage II				54	Sigmoid Colon	TCGA-AA-3509	80e677b1-5ebe-4069-a1a5-1538ffee6642	NO	Not Available	Not Available	Not Available	18	-19786	Not Applicable	0	0	Not Available																									Not Available
TCGA-A6-2674	1331	Alive	T3	N2	M1	Stage IV		FPPP	TCGA	71	Sigmoid Colon	TCGA-A6-2674	57cdaa1c-4e94-4a28-ab3b-300c0457555f	NO	Not Available	Not Available	NO	15	-26292	Not Applicable	0	523	Not Available		TCGA-A6-2674-D4952;TCGA-A6-2674-D4948;TCGA-A6-2674-D4949;TCGA-A6-2674-D4947;TCGA-A6-2674-D4951;TCGA-A6-2674-D18367;TCGA-A6-2674-D18369;TCGA-A6-2674-D18370;TCGA-A6-2674-D18366;TCGA-A6-2674-D18368	3ce98d9a-0b40-4e25-9ba2-58794d288247;b5b3adc2-ffb4-480a-866c-996bf91eed24;5022a88e-849c-499e-8708-80ef8f39165c;365ae66b-f33f-45f3-8894-0ad421609e63;5a028017-d8ab-465a-8dca-6416332d59d8;ba5c0262-3fbf-4e10-b18e-6d74b224da07;a127ba7d-746f-46df-a7e8-d89a4a9945b6;a2845a5c-66f7-4f7e-879d-33b8d06cb6ba;13dd3946-99d8-43e0-b529-b79140588e52;3779457f-da47-48bc-bb01-e9f988c8a6fc	Not Available;Not Available;Not Available;Not Available;Not Available;Not Available;Not Available;Not Available;Not Available;Not Available	15;15;15;15;15;14;14;14;14;14	237;237;237;237;239;944;944;946;944;944	90;75;75;75;75;761;761;761;761;761	Avastin;Levcovorin;5 FU;Oxaliplatin;5 FU;Oxaliplatin;Fluorouracil;Fluorouracil;Bevacizumab;Leucovorin	Not Available;Not Available;Not Available;Not Available;Not Available;Not Available;Not Available;Not Available;Not Available;Not Available	10;10;10;10;10;11;11;11;11;11	10;12;12;12;12;12;12;12;12;12	440;800;800;170;4800;173-177;812-832;4872-4992;400-448;50-800	mg;mg;mg;mg;mg;mg;mg;mg;mg;mg	ADJUVANT;ADJUVANT;ADJUVANT;ADJUVANT;ADJUVANT;RECURRENCE;RECURRENCE;RECURRENCE;RECURRENCE;RECURRENCE	Not Applicable;Not Applicable;Not Applicable;Not Applicable;Not Applicable;Not Applicable;Not Applicable;Not Applicable;Not Applicable;Not Applicable	1;1;1;1;1;2;2;2;2;2	IV;IV;IV;IV;IV;IV;IV;IV;IV;IV	NO;NO;NO;NO;NO;NO;NO;NO;NO;NO	Targeted Molecular therapy;Other, specify in notes;Chemotherapy;Chemotherapy;Chemotherapy;Chemotherapy;Chemotherapy;Chemotherapy;Targeted Molecular therapy;Other, specify in notes	Not Available;Ancillary;Not Available;Not Available;Not Available;Not Available;Not Available;Not Available;Not Available;ancillary	4400;9150;9150;1950;54600;2093;9852;59112;5173;1750	mg;mg;mg;mg;mg;mg;mg;mg;mg;mg	Not Available;Not Available;Not Available;Not Available;Not Available;Not Available;Not Available;Not Available;Not Available;Not Available	2010;2010;2010;2010;2010;2011;2011;2011;2011;2011	NOT HISPANIC OR LATINO
TCGA-CM-4751	822	Alive	T3	N1b	M0	Stage IIIB				62	Cecum	TCGA-CM-4751	e3ca9046-9634-4332-b19f-88b18110f941	NO	Not Available	Not Available	NO	8	-22891	Not Applicable	0	607	Not Available		TCGA-CM-4751-D16812;TCGA-CM-4751-D16809;TCGA-CM-4751-D16808;TCGA-CM-4751-D16811	38f342e3-3027-4015-9bd8-e32b4147942b;ea440ecc-252e-439d-80d0-8b9ddf66e13c;ebbc8014-2a28-4c55-a8cf-ad5368fff25c;7814e988-0038-4dcb-8e97-89c1cbbb1f6f	Not Available;Not Available;Not Available;Not Available	26;26;26;26	208;208;208;208	54;54;54;54	Oxaliplatin;Fluorouracil;Fluorouracil;Leucovorin Calcium	Not Available;Not Available;Not Available;Not Available	9;9;9;9	12;12;12;12	150;2800;900;900	mg;mg;mg;mg	ADJUVANT;ADJUVANT;ADJUVANT;ADJUVANT	Not Applicable;Not Applicable;Not Applicable;Not Applicable	1;1;1;1	IV;IV;IV;IV	NO;NO;NO;NO	Chemotherapy;Chemotherapy;Chemotherapy;Other, specify in notes	Not Available;Not Available;Not Available;Ancillary	1950;28200;9450;9450	mg;mg;mg;mg	Not Available;Not Available;Not Available;Not Available	2011;2011;2011;2011	NOT HISPANIC OR LATINO
TCGA-A6-2681	1387	Alive	T3	N0	M0	Stage IIA				73	Cecum	TCGA-A6-2681	7d8eab0a-e6c8-4449-9ebf-50c41db94a06	NO	Not Available	Not Available	NO	14	-26929	Not Applicable	0	552	Not Available																									NOT HISPANIC OR LATINO
TCGA-D5-6537	146	Dead	T3	N1a	MX	Stage IIIB				64	Transverse Colon	TCGA-D5-6537	ebc5a6f8-34fd-48c1-a2b9-7f60f45fbf27	NO	Not Available	18	YES	9	-23381	Not Applicable	0	137	Not Available																									NOT HISPANIC OR LATINO
TCGA-AA-3973	397	Alive	T4	N1	M1	Stage IV				69	Sigmoid Colon	TCGA-AA-3973	e8841edf-e070-425b-b4d4-bbb2115f9dbd	NO	Not Available	Not Available	Not Available	18	-25536	Not Applicable	0	0	Not Available		TCGA-AA-3973-D37432;TCGA-AA-3973-D37433;TCGA-AA-3973-D37434;TCGA-AA-3973-D37435	02288D76-A58F-4E92-B19E-08FA0A8A09A3;8C12A90B-FDED-4D29-B7FA-DCDA7A730754;33052D56-5F11-49F8-BABA-6F23D89EB61D;830E21DE-6412-4062-B970-4C321B01D3D4	Not Available;Not Available;Not Available;Not Available	3;3;3;3	305;305;305;305	31;31;31;Not Available	Folinic acid;5-Fluorouracil;Irinotecan;Bevacizumab	Stable Disease;Stable Disease;Stable Disease;Stable Disease	12;12;12;12	Not Available;Not Available;Not Available;Not Available	Not Available;Not Available;Not Available;Not Available	Not Available;Not Available;Not Available;Not Available	Not Available;Not Available;Not Available;Not Available	Not Applicable;Not Applicable;Not Applicable;Not Applicable	Not Available;Not Available;Not Available;Not Available	Not Available;Not Available;Not Available;Not Available	NO;NO;NO;NO	Chemotherapy;Chemotherapy;Chemotherapy;Targeted Molecular therapy	Not Available;Not Available;Not Available;Not Available	Not Available;Not Available;Not Available;Not Available	Not Available;Not Available;Not Available;Not Available	NO;NO;NO;NO	2012;2012;2012;2012	Not Available
TCGA-CM-6167	456	Alive	T3	N2b	M0	Stage IIIC				57	Cecum	TCGA-CM-6167	d42bc7f0-cfb2-4ece-ae47-521308635633	NO	Not Available	Not Available	YES	19	-21031	Not Applicable	0	122	Not Available																									NOT HISPANIC OR LATINO
TCGA-A6-3807	1054	Alive	T3	N2	M0	Stage IIIC				53	Sigmoid Colon	TCGA-A6-3807	5116e3b4-2bac-40f5-8046-b9c1783faaa5	NO	Not Available	Not Available	YES	26	-19624	Not Applicable	0	333	Not Available		TCGA-A6-3807-D2548;TCGA-A6-3807-D2549;TCGA-A6-3807-D2547;TCGA-A6-3807-D2550	96c56ecc-18dd-4d47-9052-82db0bb3e1b6;ed12b670-cdaf-487d-823f-f127a5dae4ed;5ef50513-5321-43a8-bc76-7532cf293e1c;4a311e57-72d6-43e9-8b60-bd0c5e8c7bb6	Not Available;Not Available;Not Available;Not Available	26;26;26;26	242;242;242;244	74;74;74;74	Leucovorin;5-FU;Oxaliplatin;5 FU	Not Available;Not Available;Not Available;Not Available	10;10;10;10	12;12;12;12	360-925;360-925;100-195;2150-5500	mg;mg;mg;mg	ADJUVANT;ADJUVANT;ADJUVANT;ADJUVANT	Not Applicable;Not Applicable;Not Applicable;Not Applicable	1;1;1;1	IV;IV;IV;IV	NO;NO;NO;NO	Other, specify in notes;Chemotherapy;Chemotherapy;Chemotherapy	Ancillary;Not Available;Not Available;Not Available	5515;5515;1295;33,350	mg;mg;mg;mg	Not Available;Not Available;Not Available;Not Available	2010;2010;2010;2010	NOT HISPANIC OR LATINO
TCGA-A6-4107	987	Alive	T3	N1b	M0	Stage IIIB				57	Ascending Colon	TCGA-A6-4107	b079a153-62f9-4026-a2f8-a1390168bbb9	NO	Not Available	Not Available	NO	4	-21064	Not Applicable	0	231	Not Available		TCGA-A6-4107-D7159;TCGA-A6-4107-D7160;TCGA-A6-4107-D7151;TCGA-A6-4107-D7158	fc232b41-59b3-4ad0-a64c-ec240b773181;efcd9394-67ff-45db-a8c8-2a14eafa65f6;4e2c6d3a-81e4-478e-9011-aa1486b9be7b;f448b097-dfa4-4115-9bcc-0bfb694afc51	Not Available;Not Available;Not Available;Not Available	4;4;4;4	197;199;197;197	50;50;50;50	5 FU;5 FU;Oxaliplatin;Leucovorin	Not Available;Not Available;Not Available;Not Available	2;2;2;2	11;11;11;11	546-752;3276-4512;77-160;50-750	mg;mg;mg;mg	ADJUVANT;ADJUVANT;ADJUVANT;ADJUVANT	Not Applicable;Not Applicable;Not Applicable;Not Applicable	1;1;1;1	IV;IV;IV;IV	NO;NO;NO;NO	Chemotherapy;Chemotherapy;Chemotherapy;Other, specify in notes	Not Available;Not Available;Not Available;Ancillary	7800;46800;1414;4050	mg;mg;mg;mg	Not Available;Not Available;Not Available;Not Available	2011;2011;2011;2011	NOT HISPANIC OR LATINO
TCGA-AU-6004	824	Alive	T2	N0	M0	Stage I				69	Cecum	TCGA-AU-6004	32b77693-18e1-4692-8488-add1940c9e7c	NO	Not Available	90	NO	3	-25259	Not Applicable	0	203	Not Available																									NOT HISPANIC OR LATINO
TCGA-AZ-5407	2683	Alive	T1	N0	M0	Stage I				51	Cecum	TCGA-AZ-5407	b718134c-5231-4f29-a423-7bad17c93fc5	Not Available	Not Available	Not Available	Not Available	29	-18820	Not Applicable	0	1395	Not Available																									NOT HISPANIC OR LATINO
TCGA-AY-6197	652	Alive	T3	N0		Stage IIA				60	Cecum	TCGA-AY-6197	f6c674bf-396d-4bfe-8d08-e7266c314be3	NO	Not Available	Not Available	NO	14	-21957	Not Applicable	0	113	Not Available																									NOT HISPANIC OR LATINO
TCGA-AA-3684	0	Alive	T4	N2	M1	Stage IV				65	Cecum	TCGA-AA-3684	d761bc06-dee8-478a-be99-8af9c504e49c	NO	Not Available	Not Available	Not Available	18	-23741	Not Applicable	0	0	Not Available																									Not Available
TCGA-AZ-4615	1002	Alive	T3	N1	M0	Stage IIIB				84	Not Available	TCGA-AZ-4615	bf69a4ce-ec7e-4752-a86d-dcc80e3c9a57	Not Available	Not Available	50	Not Available	22	-30908	Not Applicable	0	506	Not Available		TCGA-AZ-4615-D20214	9550a75a-dc24-400b-92c2-7665b57c6325	Not Available	6	264	89	XELODA	Not Available	1	8	Not Available	Not Available	ADJUVANT	Not Applicable	Not Available	PO	NO	Chemotherapy	Not Available	Not Available	Not Available	Not Available	2012	NOT HISPANIC OR LATINO
TCGA-AA-3494	31	Alive	T3	N0	M1	Stage IV				55	Sigmoid Colon	TCGA-AA-3494	67ba29e7-f294-4dcd-9630-ad768c22c588	NO	Not Available	Not Available	Not Available	18	-20089	Not Applicable	0	31	Not Available		TCGA-AA-3494-D37440;TCGA-AA-3494-D37441;TCGA-AA-3494-D37442;TCGA-AA-3494-D37443;TCGA-AA-3494-D37444;TCGA-AA-3494-D37445	96AC2755-D00C-43F2-AF85-250EEE267909;22607192-21C1-46B1-9007-82F8207BD46F;8D724D6C-49CF-4BD7-840D-2DF9295914B5;43259854-0480-42D0-98A2-F62606319067;2F9DDCC4-8761-4EF4-9C8C-9487B219A252;D326355B-264D-4391-9026-C1B14D59A663	Not Available;Not Available;Not Available;Not Available;Not Available;Not Available	3;3;3;3;3;3	184;184;792;334;1065;1065	92;92;184;212;334;792	Folinic acid;5-Fluorouracil;Capecitabine;Oxaliplatin;Irinotecan;Cetuximab	Partial Response;Partial Response;Stable Disease;Partial Response;Stable Disease;Stable Disease	12;12;12;12;12;12	Not Available;Not Available;Not Available;Not Available;Not Available;Not Available	Not Available;Not Available;Not Available;Not Available;Not Available;Not Available	Not Available;Not Available;Not Available;Not Available;Not Available;Not Available	Not Available;Not Available;Not Available;Not Available;Not Available;Not Available	Not Applicable;Not Applicable;Not Applicable;Not Applicable;Not Applicable;Not Applicable	Not Available;Not Available;Not Available;Not Available;Not Available;Not Available	Not Available;Not Available;Not Available;Not Available;Not Available;Not Available	NO;NO;NO;NO;NO;NO	Chemotherapy;Chemotherapy;Chemotherapy;Chemotherapy;Chemotherapy;Targeted Molecular therapy	Not Available;Not Available;Not Available;Not Available;Not Available;Not Available	Not Available;Not Available;Not Available;Not Available;Not Available;Not Available	Not Available;Not Available;Not Available;Not Available;Not Available;Not Available	NO;NO;NO;NO;NO;NO	2012;2012;2012;2012;2012;2012	Not Available
TCGA-QG-A5Z1	256	Dead	T3	N1b	MX	Stage IIIB				71	Sigmoid Colon	TCGA-QG-A5Z1	9C45EAEC-D854-4F51-80A3-2D80D6B4AEBC	NO	Not Available	5	NO	20	-26220	Not Applicable	0	202	Not Available		TCGA-QG-A5Z1-D44489	807D7DF2-414D-4DA2-9BC6-74DBA0713296	Not Available	17	Not Available	Not Available	Not Available	Complete Response	2	Not Available	Not Available	Not Available	Not Available	Not Applicable	Not Available	Not Available	NO	Chemotherapy	Not Available	Not Available	Not Available	NO	2014	NOT HISPANIC OR LATINO
TCGA-A6-6651	662	Alive	T3	N1b	MX	Stage IIIB				55	Transverse Colon	TCGA-A6-6651	0ec6ed47-db99-4273-9823-ffbde6a77091	NO	Not Available	Not Available	YES	7	-20110	Not Applicable	0	249	Not Available		TCGA-A6-6651-D18528;TCGA-A6-6651-D18527;TCGA-A6-6651-D18529;TCGA-A6-6651-D18530	a528abe3-9cc5-4833-8f81-9086291a9c00;8ab6ac64-e947-4bbd-85c6-2e8d7b472d87;74c23414-80cb-4ae3-bcf2-a52122118f4f;1d1b2876-8f89-4115-a26e-e437e8174fc0	Not Available;Not Available;Not Available;Not Available	18;18;18;18	247;205;249;247	77;77;77;77	Leucovorin;Oxaliplatin;Fluorouracil;Fluorouracil	Not Available;Not Available;Not Available;Not Available	11;11;11;11	12;9;12;12	50-350;130-164;4560-4704;760-784	mg;mg;mg;mg	ADJUVANT;ADJUVANT;ADJUVANT;ADJUVANT	Not Applicable;Not Applicable;Not Applicable;Not Applicable	1;1;1;1	IV;IV;IV;IV	NO;NO;NO;NO	Other, specify in notes;Chemotherapy;Chemotherapy;Chemotherapy	Ancillary;Not Available;Not Available;Not Available	1150;1304;55368;9228	mg;mg;mg;mg	Not Available;Not Available;Not Available;Not Available	2011;2011;2011;2011	NOT HISPANIC OR LATINO
TCGA-CM-5862	153	Dead	T3	N1a	M1a	Stage IVA				80	Ascending Colon	TCGA-CM-5862	a19cd9f8-482b-4b70-b7d7-06d6bb1b0260	YES	Normal	Not Available	YES	18	-29493	153	0	Not Available	Not Available																									NOT HISPANIC OR LATINO
TCGA-AA-3841	1124	Alive	T3	N0	M0	Stage IIA				66	Sigmoid Colon	TCGA-AA-3841	7dfbc0ed-e684-4966-8b59-fb6b9e80c129	NO	Not Available	Not Available	Not Available	18	-24230	Not Applicable	0	0	Not Available		TCGA-AA-3841-D37472;TCGA-AA-3841-D37473;TCGA-AA-3841-D37474	906C70DA-8292-4D49-8219-0605D0D83B41;61C33BB9-928A-45B2-9AAE-FE545603CFCF;4C4944D0-9643-4CFB-9322-92554CEE4DA5	Not Available;Not Available;Not Available	3;3;3	242;242;242	59;59;59	Folinic acid;5-Fluorouracil;Oxaliplatin	Complete Response;Complete Response;Complete Response	12;12;12	Not Available;Not Available;Not Available	Not Available;Not Available;Not Available	Not Available;Not Available;Not Available	Not Available;Not Available;Not Available	Not Applicable;Not Applicable;Not Applicable	Not Available;Not Available;Not Available	Not Available;Not Available;Not Available	NO;NO;NO	Chemotherapy;Chemotherapy;Chemotherapy	Not Available;Not Available;Not Available	Not Available;Not Available;Not Available	Not Available;Not Available;Not Available	NO;NO;NO	2012;2012;2012	Not Available
TCGA-D5-5541	1701	Alive	T3	N1a	M0	Stage IIIB				63	Sigmoid Colon	TCGA-D5-5541	94067eb7-98b7-4975-bab1-c09e1b454a25	NO	Not Available	36	NO	25	-23109	Not Applicable	0	202	Not Available		TCGA-D5-5541-D13833	a81be0b5-fa86-4b78-91df-05546d47d69c	Not Available	4	279	19	Calcium Foliatum, fluorouracilum, oxaliplatinum, dexamethassone	Not Available	7	12	Calcium Foliatum 768mg, fluorouracilum 3890mg, oxaliplatinum 163,2mg, dexamethassone 8mg	mg	ADJUVANT	Not Applicable	FOL FOX4	IV	NO	Chemotherapy	Not Available	Not Available	mg	Not Available	2011	NOT HISPANIC OR LATINO
TCGA-AA-3852	0	Dead	T3	N0	M0	Stage IIA				88	Transverse Colon	TCGA-AA-3852	6fc5e56a-1f5e-4ff1-948e-5ef636ebb48d	NO	Not Available	Not Available	Not Available	18	-32203	0	0	Not Available	Not Available																									Not Available
TCGA-G4-6310	1935	Alive	T3	N1	M0	Stage IIIB				69	Cecum	TCGA-G4-6310	14c13b05-abfe-472e-83a9-b28f60e58ad8	NO	Not Available	8	NO	6	-25243	Not Applicable	0	1205	Not Available		TCGA-G4-6310-D21934;TCGA-G4-6310-D21935;TCGA-G4-6310-D21938;TCGA-G4-6310-D21933;TCGA-G4-6310-D21937;TCGA-G4-6310-D21928;TCGA-G4-6310-D21936	ced5bc62-7f2c-48e6-b830-f6f4a131fb03;5e979430-9982-4b1b-8485-4805ba371049;477f4c3c-ef6e-4873-9d95-3b1aa1e0d9a9;892163e8-62fc-4fbe-a0ed-712508e46f84;7648d80e-9205-4675-b34d-f82fa7ab36a7;cb1310c0-860e-4d70-a72e-96e0fdc38613;1b57d686-2c1f-43ea-a842-1360b246b826	Not Available;Not Available;Not Available;Not Available;Not Available;Not Available;Not Available	25;25;25;25;25;25;25	76;132;194;76;194;76;194	34;90;153;34;153;34;153	5-FU;Xeloda;5-FU;Leucovorin;Leucovorin;Oxaliplatin;Oxaliplatin	Not Available;Not Available;Not Available;Not Available;Not Available;Not Available;Not Available	1;1;1;1;1;1;1	4;Not Available;4;4;4;4;4	Not Available;3000;Not Available;840;800;180;170	Not Available;mg/day;Not Available;mg;mg;mg;mg	ADJUVANT;ADJUVANT;ADJUVANT;ADJUVANT;ADJUVANT;ADJUVANT;ADJUVANT	Not Applicable;Not Applicable;Not Applicable;Not Applicable;Not Applicable;Not Applicable;Not Applicable	1;2;3;1;3;1;3	Not Available;PO;Not Available;IV;IV;IV;IV	NO;NO;NO;NO;NO;NO;NO	Chemotherapy;Chemotherapy;Chemotherapy;Other, specify in notes;Other, specify in notes;Chemotherapy;Chemotherapy	Not Available;Not Available;Not Available;Ancillary;Ancillary;Not Available;Not Available	Not Available;90000;Not Available;3200;3200;684;680	Not Available;mg;Not Available;mg;mg;mg;mg	Not Available;Not Available;Not Available;Not Available;Not Available;Not Available;Not Available	2012;2012;2012;2012;2012;2012;2012	NOT HISPANIC OR LATINO
TCGA-A6-2678	1286	Alive	T3	N1	M0	Stage IIIB				43	Transverse Colon	TCGA-A6-2678	3a785e32-7960-4c72-84c4-fb42c4dd86f1	NO	Not Available	Not Available	NO	25	-16030	Not Applicable	0	437	Not Available		TCGA-A6-2678-D2528;TCGA-A6-2678-D2529;TCGA-A6-2678-D2527;TCGA-A6-2678-D2530	62fa0dfa-21c9-4bbf-b910-f7f695e7f169;a47a2727-c80a-47bf-82e3-43613c0f7535;203e134c-6cea-4850-85fb-61d0590d6783;b23a79b4-3671-4ae4-8a1b-461b91a9de9a	Not Available;Not Available;Not Available;Not Available	25;25;25;25	214;214;214;214	60;60;60;60	5- FU;5- FU;Oxaliplatin;Leucovorin	Not Available;Not Available;Not Available;Not Available	10;10;10;10	12;12;12;12	776-804;4656-4872;100-170;800	mg;mg;mg;mg	ADJUVANT;ADJUVANT;ADJUVANT;ADJUVANT	Not Applicable;Not Applicable;Not Applicable;Not Applicable	1;1;1;1	IV;IV;IV;IV	NO;NO;NO;NO	Chemotherapy;Chemotherapy;Chemotherapy;Other, specify in notes	Not Available;Not Available;Not Available;Ancillary	9588;57528;1531;9600	mg;mg;mg;mg	Not Available;Not Available;Not Available;Not Available	2010;2010;2010;2010	NOT HISPANIC OR LATINO
TCGA-AU-3779	441	Alive	T3	N0	M0	Stage IIA				80	Rectosigmoid Junction	TCGA-AU-3779	fb4cc403-694c-421f-b360-3108b6d57ad5	NO	Not Available	35	NO	28	-29460	Not Applicable	0	441	Not Available																									NOT HISPANIC OR LATINO
TCGA-F4-6461	338	Dead	T4b	N2	M0	Stage IIIC				41	Hepatic Flexure	TCGA-F4-6461	2900eadd-7e27-4371-94e5-7d58cdff0138	NO	Not Available	Not Available	NO	20	-15151	Not Applicable	0	0	Not Available																									NOT HISPANIC OR LATINO
TCGA-AA-3666	61	Dead	T3	N1	M0	Stage III				68	Cecum	TCGA-AA-3666	a512701f-88bb-4b05-8c94-fd285b9dd13e	NO	Not Available	Not Available	Not Available	18	-25020	61	0	Not Available	Not Available																									Not Available
TCGA-F4-6460	972	Dead	T3	N1	M0	Stage IIIB				51	Sigmoid Colon	TCGA-F4-6460	2a7bbafe-d499-4241-ba3d-a52ba0a5db3c	NO	Not Available	Not Available	NO	20	-18637	Not Applicable	0	0	Not Available		TCGA-F4-6460-D29825;TCGA-F4-6460-D29827;TCGA-F4-6460-D29828	24A4BE6E-8504-46A7-9FE6-9F601A1E0AAA;E00AA1AF-9E7F-47DD-BA9D-3662DCE2FD87;DE75E343-2A6A-4264-A2B7-1F99A217E0C7	Not Available;Not Available;Not Available	29;29;29	229;138;Not Available	26;26;313	Capecitabine;Oxaliplatin;Raltitrexed	Not Available;Not Available;Not Available	3;3;3	10;6;5	4;150;4	g/day;mg/day;g/day	ADJUVANT;ADJUVANT;ADJUVANT	Not Applicable;Not Applicable;Not Applicable	Not Available;Not Available;Not Available	PO;IV;IV	NO;NO;YES	Chemotherapy;Chemotherapy;Chemotherapy	Not Available;Not Available;Not Available	640;900;20	g/day;mg;Not Available	Not Available;Not Available;Not Available	2012;2012;2012	NOT HISPANIC OR LATINO
TCGA-AA-3818	30	Dead	T3	N0	M0	Stage IIA				78	Hepatic Flexure	TCGA-AA-3818	fdffda5f-72b2-4153-b7f1-d7043b7ca898	NO	Not Available	Not Available	Not Available	18	-28763	30	0	Not Available	Not Available																									Not Available
TCGA-AA-3496	31	Alive	T3	N0	M0	Stage II				83	Ascending Colon	TCGA-AA-3496	639e1050-088a-48fe-a0ef-4a01a3468cac	NO	Not Available	Not Available	Not Available	18	-30438	Not Applicable	0	31	Not Available																									Not Available
TCGA-AA-3492	1	Dead	T3	N0	M0	Stage II				90	Ascending Colon	TCGA-AA-3492	85e95dda-6198-464a-9187-fd0832bebb72	NO	Not Available	Not Available	Not Available	18	-32871	Not Applicable	0	0	Not Available																									Not Available
TCGA-CA-6719	435	Alive	T3	N0	M0	Stage IIA				77	Descending Colon	TCGA-CA-6719	9cdca5d8-ea77-4df9-b2ba-0d5e8ec37bcd	Not Available	Not Available	Not Available	Not Available	8	-28343	Not Applicable	0	41	Not Available																									NOT HISPANIC OR LATINO
TCGA-CM-4752	396	Alive	T3	N0	M0	Stage IIA				58	Ascending Colon	TCGA-CM-4752	7ea546ce-f48a-4d9c-96b4-a0124c692870	NO	Not Available	Not Available	NO	10	-21519	Not Applicable	0	123	Not Available																									NOT HISPANIC OR LATINO
TCGA-CK-6746	0	Alive	T4b	N0	MX	Stage IIB				84	Cecum	TCGA-CK-6746	a6f98ee5-9638-4ebe-804b-fba54aea9f90	NO	Not Available	20	NO	Not Available	-30957	Not Applicable	0	0	Not Available																									NOT HISPANIC OR LATINO
TCGA-AA-3967	943	Alive	T3	N1	M0	Stage IIIB				77	Sigmoid Colon	TCGA-AA-3967	86a9e44f-728e-48e4-9e1b-682b023f7c0a	NO	Not Available	Not Available	Not Available	18	-28216	Not Applicable	0	0	Not Available		TCGA-AA-3967-D37420;TCGA-AA-3967-D37421;TCGA-AA-3967-D37422	88E98323-5636-42CA-B3E4-61BD63936922;ED66B9C8-A20C-4B19-914C-BA8AFC2CB529;845B10DA-CB7B-4517-ADFB-318C6F3A217E	Not Available;Not Available;Not Available	3;3;3	213;213;182	60;60;90	Folinic acid;5-Fluorouracil;Oxaliplatin	Complete Response;Complete Response;Complete Response	12;12;12	Not Available;Not Available;Not Available	Not Available;Not Available;Not Available	Not Available;Not Available;Not Available	Not Available;Not Available;Not Available	Not Applicable;Not Applicable;Not Applicable	Not Available;Not Available;Not Available	Not Available;Not Available;Not Available	NO;NO;NO	Chemotherapy;Chemotherapy;Chemotherapy	Not Available;Not Available;Not Available	Not Available;Not Available;Not Available	Not Available;Not Available;Not Available	NO;NO;NO	2012;2012;2012	Not Available
TCGA-AA-3672	0	Alive	T3	N1	M0	Stage III				90	Transverse Colon	TCGA-AA-3672	c46971a1-cbac-425d-bac2-f4142c92522e	NO	Not Available	Not Available	Not Available	18	-32873	Not Applicable	0	0	Not Available																									Not Available
TCGA-D5-6539	380	Alive	T3	N0	M0					45	Transverse Colon	TCGA-D5-6539	ef4bb5bf-4535-4bd1-8a74-aba920123ee2	NO	Not Available	Not Available	Not Available	9	-16703	Not Applicable	0	145	Not Available																									NOT HISPANIC OR LATINO
TCGA-AA-3678	1430	Alive	T2	N1	M0	Stage III				60	Sigmoid Colon	TCGA-AA-3678	c616f95f-4ea1-4019-8c17-041878085c88	NO	Not Available	Not Available	Not Available	18	-22219	Not Applicable	0	0	Not Available		TCGA-AA-3678-D37451;TCGA-AA-3678-D37452	A670C33A-E236-4318-9A49-820A1091CD06;12C68CEF-0CF7-4B84-9CF2-95B80C236707	Not Available;Not Available	3;3	242;242	30;30	Folinic acid;5-Fluorouracil	Complete Response;Complete Response	12;12	Not Available;Not Available	Not Available;Not Available	Not Available;Not Available	Not Available;Not Available	Not Applicable;Not Applicable	Not Available;Not Available	Not Available;Not Available	NO;NO	Chemotherapy;Chemotherapy	Not Available;Not Available	Not Available;Not Available	Not Available;Not Available	NO;NO	2012;2012	Not Available
TCGA-AA-3986	580	Alive	T2	N0	M0	Stage I				73	Transverse Colon	TCGA-AA-3986	04d7a52f-a89b-4114-a608-a6254b4d604f	NO	Not Available	Not Available	Not Available	18	-26967	Not Applicable	0	30	Not Available																									Not Available
TCGA-CM-6164	883	Alive	T3	N0	M0	Stage IIA				46	Sigmoid Colon	TCGA-CM-6164	6a4031c6-ee88-48be-81a5-a522720edd02	NO	Not Available	Not Available	NO	19	-16802	Not Applicable	0	487	Not Available																									NOT HISPANIC OR LATINO
TCGA-DM-A28M	2895	Alive	T3	N0	M0	Stage IIA				63	Descending Colon	TCGA-DM-A28M	C48E2CE0-3806-4675-92F3-D38FF67C5EFA	YES	Normal	Not Available	Not Available	27	-23043	Not Applicable	0	2775	Not Available																									NOT HISPANIC OR LATINO
TCGA-AZ-6608	59	Dead	T2	N1	M0	Stage IIIA				55	Sigmoid Colon	TCGA-AZ-6608	f1e6ce83-b4a0-4643-8e8e-a1ef8a158a27	Not Available	Not Available	Not Available	Not Available	2	-20094	59	0	Not Available	Not Available																									NOT HISPANIC OR LATINO
TCGA-5M-AATE	1200	Alive	T3	N0	M0	Stage IIA				76	Ascending Colon	TCGA-5M-AATE	A54B322B-80D3-435C-8D14-25841B741F6C	NO	Not Available	Not Available	NO	27	-27870	Not Applicable	0	1200	Not Available																									HISPANIC OR LATINO
TCGA-DM-A282	4233	Alive	T3	N0	M0	Stage IIA				60	Hepatic Flexure	TCGA-DM-A282	E75985CB-357E-4072-B047-EEA37965D70C	YES	Normal	Not Available	NO	27	-22265	Not Applicable	0	4122	Not Available																									NOT HISPANIC OR LATINO
TCGA-AA-3989	242	Dead	T3	N2	M1	Stage IV				84	Transverse Colon	TCGA-AA-3989	d5619045-060a-4b60-86e4-6a5774994fd4	NO	Not Available	Not Available	Not Available	18	-30712	Not Applicable	0	0	Not Available																									Not Available
TCGA-A6-A566	758	Dead	T4	N1	M0	Stage IIIB				55	Descending Colon	TCGA-A6-A566	790266BC-C252-43F4-85D1-1B06EE529CF8	Unknown	Not Available	Not Available	NO	15	-20181	758	0	Not Available	Not Available		TCGA-A6-A566-D42252;TCGA-A6-A566-D42254;TCGA-A6-A566-D42262;TCGA-A6-A566-D42264	74C0E183-B802-4EFC-BD08-FCBB9930035D;F111779F-8AA9-4640-9CCE-7CA1D108F7CE;843A4503-B4D5-4C02-8919-45C327BA724F;4F12D452-984F-40FF-A277-8CDEDCAA4B42	Not Available;Not Available;Not Available;Not Available	15;15;15;15	237;251;251;253	76;76;76;76	Oxaliplatin;Fluorouracil;Leucovorin;Fluorouracil	Clinical Progressive Disease;Clinical Progressive Disease;Clinical Progressive Disease;Clinical Progressive Disease	4;4;4;4	Not Available;Not Available;Not Available;Not Available	Not Available;Not Available;Not Available;Not Available	Not Available;Not Available;Not Available;Not Available	Not Available;Not Available;Not Available;Not Available	Not Applicable;Not Applicable;Not Applicable;Not Applicable	Not Available;Not Available;Not Available;Not Available	Not Available;Not Available;Not Available;Not Available	NO;NO;NO;NO	Chemotherapy;Chemotherapy;Ancillary;Chemotherapy	Not Available;Not Available;Not Available;Not Available	Not Available;Not Available;Not Available;Not Available	Not Available;Not Available;Not Available;Not Available	NO;NO;NO;NO	2013;2013;2013;2013	NOT HISPANIC OR LATINO
TCGA-5M-AAT4	49	Dead	T3	N0	M1b	Stage IV				74	Ascending Colon	TCGA-5M-AAT4	1136DD50-242A-4659-AAD4-C53F9E759BB3	NO	Not Available	Not Available	YES	27	-27095	49	0	Not Available	Not Available																									HISPANIC OR LATINO
TCGA-AA-3867	731	Alive	T3	N2	M1	Stage IV				74	Sigmoid Colon	TCGA-AA-3867	d655bbf6-c710-411d-aff5-ceb0fb6e6680	NO	Not Available	Not Available	Not Available	18	-27028	Not Applicable	0	0	Not Available																									Not Available
TCGA-AA-3947	1004	Alive	T4	N0	M0	Stage IIB				60	Ascending Colon	TCGA-AA-3947	654c6f5c-3e5c-49f0-b53f-87cd9797d7c9	NO	Not Available	Not Available	Not Available	18	-22035	Not Applicable	0	30	Not Available																									Not Available
TCGA-CM-4747	761	Alive	T4a	N1b	M1a	Stage IVA				47	Cecum	TCGA-CM-4747	56eb96a4-d2c2-42fb-b26c-1a80012bcb8e	NO	Not Available	Not Available	YES	23	-17198	Not Applicable	0	244	Not Available		TCGA-CM-4747-D8966;TCGA-CM-4747-D8958;TCGA-CM-4747-D8964;TCGA-CM-4747-D8956;TCGA-CM-4747-D8959	75a88a6f-c67a-4802-a0fe-6962eb8331f4;a5741352-2a80-414c-8129-cf4997f46eb0;41e99931-ad70-4652-8a54-e3f9d30b28b4;cbe7aceb-2049-4af1-b953-31d04eb6176f;559f4cb9-8305-40ca-8643-2a5077baa4b1	Not Available;Not Available;Not Available;Not Available;Not Available	17;17;17;17;17	254;252;225;252;252	114;98;98;98;98	Pegfilgrastim;Fluorouracil;Oxaliplatin;Fluorouracil;Leucovorin	Not Available;Not Available;Not Available;Not Available;Not Available	1;1;1;1;1	11;12;10;12;12	6;410-850;180;2500;410-850	mg;mg;mg;mg;mg	ADJUVANT;ADJUVANT;ADJUVANT;ADJUVANT;ADJUVANT	Not Applicable;Not Applicable;Not Applicable;Not Applicable;Not Applicable	1;1;1;1;1	SC;IV;IV;IV;IV	NO;NO;NO;NO;NO	Other, specify in notes;Chemotherapy;Chemotherapy;Chemotherapy;Other, specify in notes	Ancillary;Not Available;Not Available;Not Available;Ancillary	66;5360;1800;30000;5360	mg;mg;mg;mg;mg	Not Available;Not Available;Not Available;Not Available;Not Available	2011;2011;2011;2011;2011	NOT HISPANIC OR LATINO
TCGA-AY-5543	1004	Alive	T3	N1a	M1	Stage IVA				65	Ascending Colon	TCGA-AY-5543	14cc6f5b-5692-471e-98b4-ae200b3d8fed	NO	Not Available	Not Available	NO	7	-23870	Not Applicable	0	230	Not Available		TCGA-AY-5543-D19914;TCGA-AY-5543-D19915;TCGA-AY-5543-D19916	aea534a6-3b75-4e1b-b24f-56f269f3fa86;3fe50558-8e39-4aa2-9862-d96cf58a0c6f;465c3779-5d7e-4817-8fd0-d76b54c4dfff	Not Available;Not Available;Not Available	4;4;4	251;251;251	60;60;60	Oxaliplatin;Leucovorin;5FU	Not Available;Not Available;Not Available	1;1;1	12;12;12	85;200;2800	mg/m2;mg/m2;mg/m2	ADJUVANT;ADJUVANT;ADJUVANT	Not Applicable;Not Applicable;Not Applicable	1;1;1	IV;IV;IV	NO;NO;NO	Chemotherapy;Other, specify in notes;Chemotherapy	Not Available;Ancillary agent;Not Available	Not Available;Not Available;Not Available	Not Available;Not Available;Not Available	Not Available;Not Available;Not Available	2012;2012;2012	NOT HISPANIC OR LATINO
TCGA-D5-5540	1706	Alive	T3	N0	M0	Stage IIA				73	Cecum	TCGA-D5-5540	31d960d7-8f5b-4d22-bf5e-fae0849c4efd	NO	Not Available	70	NO	25	-26972	Not Applicable	0	198	Not Available																									NOT HISPANIC OR LATINO
TCGA-AA-A01F	974	Alive	T3	N1	M0	Stage IIIB				72	Sigmoid Colon	TCGA-AA-A01F	132229e5-947d-43e9-a54c-a97d4be7d604	NO	Not Available	Not Available	Not Available	15	-26298	Not Applicable	0	31	Not Available		TCGA-AA-A01F-D37400;TCGA-AA-A01F-D37401;TCGA-AA-A01F-D37402	A2B884E1-ED59-4356-819B-62212890077A;988E2E95-014A-4780-BDFE-813A1F8ACD26;AED5627D-9A57-44F6-82C4-CDAC2CB1EE4C	Not Available;Not Available;Not Available	3;3;3	215;215;215	62;62;62	Folinic acid;5-Fluorouracil;Oxaliplatin	Complete Response;Complete Response;Complete Response	12;12;12	Not Available;Not Available;Not Available	Not Available;Not Available;Not Available	Not Available;Not Available;Not Available	Not Available;Not Available;Not Available	Not Applicable;Not Applicable;Not Applicable	Not Available;Not Available;Not Available	Not Available;Not Available;Not Available	NO;NO;NO	Chemotherapy;Chemotherapy;Chemotherapy	Not Available;Not Available;Not Available	Not Available;Not Available;Not Available	Not Available;Not Available;Not Available	NO;NO;NO	2012;2012;2012	Not Available
TCGA-QG-A5Z2	952	Alive	T2	N0	M0	Stage I				61	Cecum	TCGA-QG-A5Z2	84959E50-17F5-4F2B-8E0C-5EBB139D2C3A	NO	Not Available	Not Available	YES	20	-22367	Not Applicable	0	449	Not Available																									NOT HISPANIC OR LATINO
TCGA-CM-5863	457	Alive	T3	N1b	M0	Stage IIIB				60	Ascending Colon	TCGA-CM-5863	cc1d6ad3-b60d-482e-8fa4-0af26823007d	NO	Not Available	Not Available	NO	26	-22127	Not Applicable	0	304	Not Available		TCGA-CM-5863-D17066;TCGA-CM-5863-D17062;TCGA-CM-5863-D17068;TCGA-CM-5863-D17065;TCGA-CM-5863-D17064	8419859d-441b-466d-9c75-b60790d0a64b;2e32a9b2-feed-4616-84aa-8c1d6ca8acd6;8ed1a0ab-3763-46c2-9f61-21677b677973;93087750-78fd-430a-9c55-be528ae2e4bb;999f4791-5483-46b6-b0e8-cec6ba836469	Not Available;Not Available;Not Available;Not Available;Not Available	30;30;30;30;30	240;240;229;240;240	86;86;229;86;86	Oxaliplatin;Fluorouracil;Pegfilgrastim;Leucovorin Calcium;Fluorouracil	Not Available;Not Available;Not Available;Not Available;Not Available	9;9;9;9;9	12;12;1;12;12	140;650;6;650;1900	mg;mg;mg;mg;mg	ADJUVANT;ADJUVANT;ADJUVANT;ADJUVANT;ADJUVANT	Not Applicable;Not Applicable;Not Applicable;Not Applicable;Not Applicable	1;1;1;1;1	IV;IV;SC;IV;IV	NO;NO;NO;NO;NO	Chemotherapy;Chemotherapy;Other, specify in notes;Other, specify in notes;Chemotherapy	Not Available;Not Available;Ancillary;Ancillary;Not Available	1510;7450;6;5000;21800	mg;mg;mg;mg;mg	Not Available;Not Available;Not Available;Not Available;Not Available	2011;2011;2011;2011;2011	NOT HISPANIC OR LATINO
TCGA-AZ-4681	3247	Alive	T3	N0	M0	Stage IIA				79	Ascending Colon	TCGA-AZ-4681	6fbc2b46-6762-4778-aa7e-782162c5397c	Not Available	Not Available	Not Available	YES	22	-28906	Not Applicable	0	2180	Not Available																									NOT HISPANIC OR LATINO
TCGA-AA-3984	0	Alive	T3	N0	M0	Stage IIA				61	Sigmoid Colon	TCGA-AA-3984	db246424-3979-4f23-b316-8d30c449ee15	NO	Not Available	Not Available	Not Available	18	-22585	Not Applicable	0	0	Not Available																									Not Available
TCGA-A6-6781	598	Alive	T4b	N1b	MX	Stage IIIC		FPPP	TCGA	43	Discrepancy	TCGA-A6-6781	b54865b6-824e-4163-b759-21a6eacc98ce	NO	Not Available	Not Available	YES	1	-15842	Not Applicable	0	158	Not Available		TCGA-A6-6781-D29217;TCGA-A6-6781-D29222;TCGA-A6-6781-D29223;TCGA-A6-6781-D29219	8bf9874b-b3a3-4f9f-a2fd-d5f1c20afc24;d19e09cd-4f33-4fdc-98be-45cb96a40be2;15555c80-b097-4e8e-a035-7b621c250a15;c2c8bb68-9f4d-4197-8e3e-b42eb78201c6	Not Available;Not Available;Not Available;Not Available	12;12;12;12	158;221;223;221	32;32;32;32	Oxaliplatin;Fluorouracil;Fluorouracil;Leucovorin	Not Available;Not Available;Not Available;Not Available	3;3;3;3	8;12;12;12	113-189;872-936;5232-5616;50-900	mg;mg;mg;mg	ADJUVANT;ADJUVANT;ADJUVANT;ADJUVANT	Not Applicable;Not Applicable;Not Applicable;Not Applicable	1;1;1;1	IV;IV;IV;IV	NO;NO;NO;NO	Chemotherapy;Chemotherapy;Chemotherapy;Other, specify in notes	Not Available;Not Available;Not Available;Ancillary	1308;10832;64992;2000	mg;mg;mg;mg	Not Available;Not Available;Not Available;Not Available	2012;2012;2012;2012	NOT HISPANIC OR LATINO
TCGA-AA-A01V	31	Alive	T2	N0	M0	Stage I				59	Cecum	TCGA-AA-A01V	0cb0dac8-4ce2-444a-b1ae-1550e065b4d9	NO	Not Available	Not Available	Not Available	15	-21792	Not Applicable	0	31	Not Available																									Not Available
TCGA-NH-A50V	588	Alive	T3	N2a	M0	Stage IIIB				69	Cecum	TCGA-NH-A50V	D3B7ADA6-5395-4212-A921-8E97C92B605D	NO	Not Available	0.45	NO	8	-25467	Not Applicable	0	154	Not Available		TCGA-NH-A50V-D40977;TCGA-NH-A50V-D40978;TCGA-NH-A50V-D67775	86D33EB0-1853-4CA8-9F9A-BF0D9C9B2279;1543E54E-1A13-4C79-B149-E1B59A6882F6;16E59916-25D8-47FA-BCB8-D292AF311082	Not Available;Not Available;Not Available	8;8;11	210;210;210	22;53;53	fluorouracil;oxaliplatin;leucovorin	Complete Response;Complete Response;Complete Response	3;3;11	Not Available;Not Available;Not Available	Not Available;Not Available;Not Available	Not Available;Not Available;Not Available	Not Available;Not Available;Not Available	Not Applicable;Not Applicable;Not Applicable	Not Available;Not Available;Not Available	Not Available;Not Available;Not Available	NO;NO;NO	Chemotherapy;Chemotherapy;Ancillary	Not Available;Not Available;Not Available	Not Available;Not Available;Not Available	Not Available;Not Available;Not Available	NO;NO;NO	2013;2013;2014	NOT HISPANIC OR LATINO
TCGA-DM-A280	236	Dead	T3	N0	M0	Stage IIA				70	Ascending Colon	TCGA-DM-A280	6775CE57-B4CF-425C-A898-061BB9A8A1A8	YES	Normal	Not Available	NO	27	-25649	236	0	236	Not Available																									NOT HISPANIC OR LATINO
TCGA-AA-3552	396	Dead	T3	N2	M0	Stage IIIC				85	Cecum	TCGA-AA-3552	265d7b06-65fe-42c5-ad21-e6b160e94718	NO	Not Available	Not Available	Not Available	18	-31290	Not Applicable	0	0	Not Available																									Not Available
TCGA-A6-6138	685	Alive	T2	N0	M0	Stage I				61	Cecum	TCGA-A6-6138	4ad9784e-1edc-4186-9b45-4dfe0003f74b	NO	Not Available	Not Available	YES	2	-22523	Not Applicable	0	182	Not Available																									NOT HISPANIC OR LATINO
TCGA-G4-6311	1199	Alive	T3	N1	MX	Stage III				80	Ascending Colon	TCGA-G4-6311	79d33c28-a7e2-4fca-8be1-a16fb6d68d49	NO	Not Available	Not Available	NO	12	-29297	Not Applicable	0	1112	Not Available		TCGA-G4-6311-D21921;TCGA-G4-6311-D21923;TCGA-G4-6311-D21922	47dfca4c-93b9-421c-be8f-617d251452ae;1e9c5fe9-4666-4187-ab0c-6c2b09dc240a;f10cb485-4558-454a-9a1e-905a5cabba57	Not Available;Not Available;Not Available	27;27;27	148;190;190	36;36;36	Oxaliplatin;Leucovorin;Fluorouracil	Not Available;Not Available;Not Available	1;1;1	9;12;12	152;400;400	mg;mg/m2;mg/m2	ADJUVANT;ADJUVANT;ADJUVANT	Not Applicable;Not Applicable;Not Applicable	1;1;1	IV;IV;IV	NO;NO;NO	Chemotherapy;Chemotherapy;Chemotherapy	Not Available;Not Available;Not Available	1369;4800;4800	mg;mg/m2;mg/m2	Not Available;Not Available;Not Available	2012;2012;2012	NOT HISPANIC OR LATINO
TCGA-QG-A5YV	1301	Alive	T4b	N1a	MX	Stage IIIC				64	Sigmoid Colon	TCGA-QG-A5YV	C83D38FC-E011-4F75-A100-96513611F3E9	NO	Not Available	4	NO	20	-23499	Not Applicable	0	821	Not Available		TCGA-QG-A5YV-D44472	90AC2E57-1CE1-40BD-A06A-24E02797C282	Not Available	20	174	72	Xeloda	Complete Response	6	Not Available	Not Available	Not Available	Not Available	Not Applicable	Not Available	Not Available	NO	Chemotherapy	Not Available	Not Available	Not Available	NO	2013	NOT HISPANIC OR LATINO
TCGA-AA-A02H	61	Dead	T3	N2	M1	Stage IV				74	Sigmoid Colon	TCGA-AA-A02H	69fb431f-0caf-4cdd-9085-eda5b18ed15d	NO	Not Available	Not Available	Not Available	15	-27362	61	0	Not Available	Not Available																									Not Available
TCGA-AA-3851	1006	Alive	T3	N0	M0	Stage IIA				74	Ascending Colon	TCGA-AA-3851	1add38c2-df6f-47c9-9373-0bec0e40baf8	NO	Not Available	Not Available	Not Available	18	-27090	Not Applicable	0	0	Not Available																									Not Available
TCGA-AA-3930	61	Dead	T3	N2	M1	Stage IV				66	Ascending Colon	TCGA-AA-3930	81f6b141-2195-4091-9cd3-dfb022663949	NO	Not Available	Not Available	Not Available	18	-24321	Not Applicable	0	0	Not Available		TCGA-AA-3930-D37377	7BFAB3A6-37A3-4A3A-9D2D-FF9B6CAE4884	Not Available	3	31	Not Available	Capecitabine	Clinical Progressive Disease	12	Not Available	Not Available	Not Available	Not Available	Not Applicable	Not Available	Not Available	NO	Chemotherapy	Not Available	Not Available	Not Available	NO	2012	Not Available
TCGA-AA-3556	700	Alive	T2	N0	M0	Stage I				78	Sigmoid Colon	TCGA-AA-3556	fd16b634-2e04-44a3-862d-fb03cd73c057	NO	Not Available	Not Available	Not Available	18	-28704	Not Applicable	0	0	Not Available																									Not Available
TCGA-D5-6532	555	Alive	T3	N0	M0	Stage IIA				61	Sigmoid Colon	TCGA-D5-6532	ac13d568-f79e-4ba7-b7bf-18e4354e0920	Not Available	Not Available	10	Not Available	13	-22344	Not Applicable	0	107	Not Available																									NOT HISPANIC OR LATINO
TCGA-AA-3548	1034	Alive	T3	N2	M0	Stage IIIC				71	Cecum	TCGA-AA-3548	2dced66c-1f0d-4039-a5e5-54cca77c16e9	NO	Not Available	Not Available	Not Available	18	-26175	Not Applicable	0	0	Not Available		TCGA-AA-3548-D37456;TCGA-AA-3548-D37457;TCGA-AA-3548-D37458	93B49DE9-A03F-4B39-B6E3-8BD4788D0490;F7F32AFA-44B0-4A6A-9750-E45777A0FCE0;E07A2591-6A1E-4F73-A3D3-516AC60E8D80	Not Available;Not Available;Not Available	3;3;3	304;304;304	31;31;31	Folinic acid;5-Fluorouracil;Irinotecan	Complete Response;Complete Response;Complete Response	12;12;12	Not Available;Not Available;Not Available	Not Available;Not Available;Not Available	Not Available;Not Available;Not Available	Not Available;Not Available;Not Available	Not Applicable;Not Applicable;Not Applicable	Not Available;Not Available;Not Available	Not Available;Not Available;Not Available	NO;NO;NO	Chemotherapy;Chemotherapy;Chemotherapy	Not Available;Not Available;Not Available	Not Available;Not Available;Not Available	Not Available;Not Available;Not Available	NO;NO;NO	2012;2012;2012	Not Available
TCGA-AA-A017	457	Alive	T3	N0	M0	Stage IIA				57	Sigmoid Colon	TCGA-AA-A017	af06cde0-c69a-4bb1-a234-8023b95e4835	NO	Not Available	Not Available	Not Available	15	-21032	Not Applicable	0	31	Not Available																									Not Available
TCGA-AD-6965	805	Alive	T4a	N2b	M0	Stage IIIC				62	Cecum	TCGA-AD-6965	c8de215d-53a4-4e6c-be58-5887a8094815	NO	Not Available	Not Available	Not Available	17	-22853	Not Applicable	0	6	Not Available		TCGA-AD-6965-D47146;TCGA-AD-6965-D47150;TCGA-AD-6965-D47186;TCGA-AD-6965-D47187;TCGA-AD-6965-D72561;TCGA-AD-6965-D72562	6FD88F0C-8E92-4A08-99F2-27BA67D1E2A1;F1C233D6-4F49-413E-86F4-3272232F0EB1;6F3BBC44-C6FD-4257-8A06-C3B96F2C35BE;8C42CF4F-ED5B-413A-83DC-A315C8C6ED8A;3ED672C0-CD23-4467-B904-44021DC2B3A9;9904C076-BC2D-4783-B9E1-4E983C9C15D4	Not Available;Not Available;Not Available;Not Available;Not Available;Not Available	22;22;22;22;16;16	196;Not Available;Not Available;Not Available;196;196	42;665;665;665;42;42	Oxaliplatin;Avastin;Irinotecan;5-FU;5FU;Leucovorin	Complete Response;Not Applicable;Not Applicable;Not Applicable;Complete Response;Complete Response	8;8;8;8;7;7	Not Available;Not Available;Not Available;Not Available;Not Available;Not Available	Not Available;Not Available;Not Available;Not Available;Not Available;Not Available	Not Available;Not Available;Not Available;Not Available;Not Available;Not Available	Not Available;Not Available;Not Available;Not Available;Not Available;Not Available	Not Applicable;Not Applicable;Not Applicable;Not Applicable;Not Applicable;Not Applicable	Not Available;Not Available;Not Available;Not Available;Not Available;Not Available	Not Available;Not Available;Not Available;Not Available;Not Available;Not Available	NO;YES;YES;YES;NO;NO	Chemotherapy;Chemotherapy;Chemotherapy;Chemotherapy;Chemotherapy;Ancillary	Not Available;Not Available;Not Available;Not Available;Not Available;Not Available	Not Available;Not Available;Not Available;Not Available;Not Available;Not Available	Not Available;Not Available;Not Available;Not Available;Not Available;Not Available	NO;NO;NO;NO;NO;NO	2013;2013;2013;2013;2015;2015	NOT HISPANIC OR LATINO
TCGA-AZ-4313	2310	Alive	T1	N0	M0	Stage I				51	Descending Colon	TCGA-AZ-4313	1fd75c4d-e74c-410c-a150-814722c6c1cc	Not Available	Not Available	12	Not Available	11	-18765	Not Applicable	0	957	Not Available																									NOT HISPANIC OR LATINO
TCGA-AA-A00K	549	Alive	T3	N0	M0	Stage IIA				79	Sigmoid Colon	TCGA-AA-A00K	0cbe9848-8eac-4ea8-a36b-fb74b4a33de7	NO	Not Available	Not Available	Not Available	15	-29189	Not Applicable	0	31	Not Available																									Not Available
TCGA-F4-6459	262	Dead	T3	N2a	M0	Stage IIIB				61	Sigmoid Colon	TCGA-F4-6459	9fd08502-355b-4f5a-a25c-73ec7184f6d3	NO	Not Available	Not Available	NO	20	-22574	Not Applicable	0	0	Not Available																									NOT HISPANIC OR LATINO
TCGA-AA-3662	184	Alive	T4	N2	M1	Stage IV				80	Sigmoid Colon	TCGA-AA-3662	d9fb85c3-ade1-47bf-8159-170f81eb130f	NO	Not Available	Not Available	Not Available	18	-29554	Not Applicable	0	0	Not Available		TCGA-AA-3662-D37403	7ABB665F-CA40-4858-A7EB-4D5B975E83F4	Not Available	3	184	62	Capecitabine	Partial Response	12	Not Available	Not Available	Not Available	Not Available	Not Applicable	Not Available	Not Available	NO	Chemotherapy	Not Available	Not Available	Not Available	NO	2012	Not Available
TCGA-G4-6625	2792	Alive	T3	N0	M0	Stage IIA				77	Sigmoid Colon	TCGA-G4-6625	5eed7e8a-c219-4497-a99f-bfc48faca4d8	NO	Not Available	Not Available	YES	14	-28163	Not Applicable	0	2673	Not Available																									NOT HISPANIC OR LATINO
TCGA-NH-A6GA	302	Dead	T4a	N2a	MX	Stage IIIC				58	Ascending Colon	TCGA-NH-A6GA	51DCBFAC-6F04-4364-877D-0BF1BD566335	NO	Not Available	50	NO	10	-21313	Not Applicable	0	182	Not Available		TCGA-NH-A6GA-D48254;TCGA-NH-A6GA-D48255;TCGA-NH-A6GA-D50201;TCGA-NH-A6GA-D50202;TCGA-NH-A6GA-D58979;TCGA-NH-A6GA-D58980;TCGA-NH-A6GA-D58981;TCGA-NH-A6GA-D58982	5EADFF6A-01B3-4724-8D7F-B59A13338091;A41B6E53-6845-4700-8105-90A0A05F439F;BEFD528B-A161-4395-A63C-4F97439D0540;D27B898F-FB23-4CBA-9769-24BAF44B08C2;0544F341-FD79-42FB-9733-CD6D396CC274;38DFFC3E-A27E-4F6B-BE5E-EBE2884CCC62;BB7CA757-40E5-485F-B40D-261FA200138F;74ED3264-9A64-47E0-8F75-79C3CC3E61DC	Not Available;Not Available;Not Available;Not Available;Not Available;Not Available;Not Available;Not Available	10;14;17;17;29;29;29;29	135;302;135;302;302;302;135;135	61;192;61;192;192;192;61;61	oxaliplatin;avastin;avastin;leucovorin;5-FU;irinotecan;leucovorin;fluorouracil	Clinical Progressive Disease;Clinical Progressive Disease;Unknown;Clinical Progressive Disease;Clinical Progressive Disease;Clinical Progressive Disease;Clinical Progressive Disease;Clinical Progressive Disease	9;9;10;10;4;4;4;4	Not Available;Not Available;Not Available;Not Available;Not Available;Not Available;Not Available;Not Available	Not Available;Not Available;Not Available;Not Available;Not Available;Not Available;Not Available;Not Available	Not Available;Not Available;Not Available;Not Available;Not Available;Not Available;Not Available;Not Available	Not Available;Not Available;Not Available;Not Available;Not Available;Not Available;Not Available;Not Available	Not Applicable;Not Applicable;Not Applicable;Not Applicable;Not Applicable;Not Applicable;Not Applicable;Not Applicable	Not Available;Not Available;Not Available;Not Available;Not Available;Not Available;Not Available;Not Available	Not Available;Not Available;Not Available;Not Available;Not Available;Not Available;Not Available;Not Available	NO;NO;NO;NO;NO;NO;NO;NO	Chemotherapy;Chemotherapy;Chemotherapy;Ancillary;Chemotherapy;Chemotherapy;Ancillary;Chemotherapy	Not Available;Not Available;Not Available;Not Available;Not Available;Not Available;Not Available;Not Available	Not Available;Not Available;Not Available;Not Available;Not Available;Not Available;Not Available;Not Available	Not Available;Not Available;Not Available;Not Available;Not Available;Not Available;Not Available;Not Available	NO;NO;NO;NO;NO;NO;NO;NO	2013;2013;2013;2013;2014;2014;2014;2014	NOT HISPANIC OR LATINO
TCGA-CM-6165	488	Alive	T3	N0	M0	Stage IIA				74	Sigmoid Colon	TCGA-CM-6165	f4e047a5-bdb2-4bc2-aff0-e0f45bcc9062	NO	Not Available	Not Available	NO	19	-27302	Not Applicable	0	212	Not Available																									NOT HISPANIC OR LATINO
TCGA-G4-6586	1089	Alive	T3	N0	M0	Stage IIA				73	Ascending Colon	TCGA-G4-6586	7570761b-c333-40df-ac8c-9b7f94c58ef9	NO	Not Available	Not Available	NO	14	-27020	Not Applicable	0	741	Not Available																									NOT HISPANIC OR LATINO
TCGA-QL-A97D	666	Alive	T2	N0	MX	Stage I				84	Cecum	TCGA-QL-A97D	D5A1F43E-25A7-47F5-B63E-43714F9F732A	Not Available	Not Available	Not Available	Not Available	20	-30914	Not Applicable	0	295	Not Available																									Not Evaluated
TCGA-DM-A28K	2988	Alive	T3	N0	M0	Stage IIA				75	Hepatic Flexure	TCGA-DM-A28K	3E1886A8-2ED2-41EE-8B58-10F5321ADE6F	NO	Not Available	Not Available	Not Available	27	-27428	Not Applicable	0	2835	Not Available																									NOT HISPANIC OR LATINO
TCGA-CA-5256	379	Alive	T3	N0	M0	Stage IIA				54	Hepatic Flexure	TCGA-CA-5256	17633a60-e12b-4a7c-bd8a-c16341ddc606	NO	Not Available	Not Available	Not Available	5	-19785	Not Applicable	0	0	Not Available		TCGA-CA-5256-D70889;TCGA-CA-5256-D70890;TCGA-CA-5256-D70891	528CCCB5-6DF2-456B-BDF6-1CE1FB302BA5;25467727-76C8-4DBE-BB26-2F51C287E804;A8E9F2B5-BB30-43C6-81DA-577AEFBC529C	Not Available;Not Available;Not Available	10;10;10	206;206;206	20;20;20	oxaliplatin;5-Fluorouracil;Folinic Acid	Complete Response;Complete Response;Complete Response	3;3;3	Not Available;Not Available;Not Available	Not Available;Not Available;Not Available	Not Available;Not Available;Not Available	Not Available;Not Available;Not Available	Not Applicable;Not Applicable;Not Applicable	Not Available;Not Available;Not Available	Not Available;Not Available;Not Available	NO;NO;NO	Chemotherapy;Chemotherapy;Chemotherapy	Not Available;Not Available;Not Available	Not Available;Not Available;Not Available	Not Available;Not Available;Not Available	NO;NO;NO	2015;2015;2015	Not Available
TCGA-F4-6855	1442	Alive	T3	N0	M0	Stage IIA				70	Sigmoid Colon	TCGA-F4-6855	1c111912-c664-42f5-9802-065b1994a2f4	Not Available	Not Available	Not Available	NO	7	-25890	Not Applicable	0	42	Not Available																									NOT HISPANIC OR LATINO
TCGA-AA-3549	639	Alive	T2	N0	M0	Stage I				69	Cecum	TCGA-AA-3549	e6ec5a68-7555-4f26-bd7e-9cdb4c5f7004	NO	Not Available	Not Available	Not Available	18	-25415	Not Applicable	0	0	Not Available																									Not Available
TCGA-DM-A28E	3648	Alive	T3	N0	M0	Stage IIA				72	Sigmoid Colon	TCGA-DM-A28E	85BDC1AC-A1A4-46C2-BC2D-E5FABF5C89E9	YES	Normal	Not Available	YES	2	-26602	Not Applicable	0	3530	Not Available																									NOT HISPANIC OR LATINO
TCGA-AA-3815	1005	Alive	T3	N0	M0	Stage IIA				65	Cecum	TCGA-AA-3815	b16bb717-d1cf-4237-a554-43f3995b82f2	NO	Not Available	Not Available	Not Available	18	-23922	Not Applicable	0	0	Not Available																									Not Available
TCGA-AA-3860	945	Alive	T3	N1	M0	Stage IIIB				53	Sigmoid Colon	TCGA-AA-3860	ac6a3df9-41b1-4e5a-a15e-f44481384c23	NO	Not Available	Not Available	Not Available	18	-19449	Not Applicable	0	0	Not Available		TCGA-AA-3860-D37483;TCGA-AA-3860-D37484;TCGA-AA-3860-D37485	A46935F0-B18B-4309-974A-98F5C9843423;66C6E947-FA93-4F75-B11C-3B9D3AB625D9;572E00AF-360A-426A-8377-D9A247751050	Not Available;Not Available;Not Available	3;3;3	184;184;184	31;31;31	Folinic acid;5-Fluorouracil;Oxaliplatin	Complete Response;Complete Response;Complete Response	12;12;12	Not Available;Not Available;Not Available	Not Available;Not Available;Not Available	Not Available;Not Available;Not Available	Not Available;Not Available;Not Available	Not Applicable;Not Applicable;Not Applicable	Not Available;Not Available;Not Available	Not Available;Not Available;Not Available	NO;NO;NO	Chemotherapy;Chemotherapy;Chemotherapy	Not Available;Not Available;Not Available	Not Available;Not Available;Not Available	Not Available;Not Available;Not Available	NO;NO;NO	2012;2012;2012	Not Available
TCGA-G4-6299	2268	Alive	T3	N2	M0	Stage IIIC				69	Descending Colon	TCGA-G4-6299	23252dca-e836-47a0-b294-758ad60aa259	NO	Not Available	Not Available	NO	1	-25318	Not Applicable	0	2077	Not Available		TCGA-G4-6299-D22030;TCGA-G4-6299-D22032;TCGA-G4-6299-D22033;TCGA-G4-6299-D22029	7c7ee768-9568-4ec4-9026-3ce737ed05dc;cdfa4fa2-4682-4fc8-883a-185c52a8986d;3a112e40-6f15-46f9-a153-7cf96e71c8f4;f7f479e8-c97f-4318-841c-4093a7451dfc	Not Available;Not Available;Not Available;Not Available	20;20;20;20	192;192;192;363	38;38;38;38	Leucovorin;Oxaliplatin;Fluorouracil;Bevacizumab	Not Available;Not Available;Not Available;Not Available	1;1;1;1	12;12;12;24	Not Available;Not Available;Not Available;5	Not Available;Not Available;Not Available;mg/kg	ADJUVANT;ADJUVANT;ADJUVANT;ADJUVANT	Not Applicable;Not Applicable;Not Applicable;Not Applicable	1;1;1;1	IV;IV;IV;IV	NO;NO;NO;NO	Other, specify in notes;Other, specify in notes;Other, specify in notes;Other, specify in notes	Phase III Clinical Trial;Phase III Clinical Trial;Phase III Clinical Trial;Phase III Clinical Trial	Not Available;Not Available;Not Available;120	Not Available;Not Available;Not Available;mg/kg	Not Available;Not Available;Not Available;Not Available	2012;2012;2012;2012	NOT HISPANIC OR LATINO
TCGA-F4-6809	403	Dead	T3	N1	M1	Stage IVA				52	Sigmoid Colon	TCGA-F4-6809	e7af286b-3dec-4cf2-8fbd-fa64b3efdf7f	NO	Not Available	Not Available	NO	25	-19039	Not Applicable	0	39	Not Available																									NOT HISPANIC OR LATINO
TCGA-AD-A5EJ	0	Alive	T3	N0	MX	Stage IIA				74	Cecum	TCGA-AD-A5EJ	613AA3E8-A70B-45A9-9C08-0C2346C8BF00	Unknown	Not Available	1	YES	12	-27180	Not Applicable	0	0	Not Available																									NOT HISPANIC OR LATINO
TCGA-DM-A0XD	743	Dead	T3	N0	M0	Stage IIA				65	Discrepancy	TCGA-DM-A0XD	a56f6562-d2af-47b9-bf81-94b3b4893173	YES	Normal	Not Available	YES	15	-23966	743	0	Not Available	Not Available																									NOT HISPANIC OR LATINO
TCGA-CK-4948	4502	Alive	T3	N1	M0	Stage III				45	Sigmoid Colon	TCGA-CK-4948	5d73b382-3da3-4220-890e-2095228bbe6c	NO	Not Available	1	NO	30	-16736	Not Applicable	0	3116	Not Available																									NOT HISPANIC OR LATINO
TCGA-AA-3837	1186	Alive	T3	N0	M0	Stage IIA				67	Hepatic Flexure	TCGA-AA-3837	0f940ec0-eb0b-422a-a764-a26c8e5c216d	NO	Not Available	Not Available	Not Available	18	-24655	Not Applicable	0	31	Not Available																									Not Available
TCGA-AA-A029	1581	Alive	T3	N0	M0	Stage II				67	Cecum	TCGA-AA-A029	93ca8937-97c0-4f6e-bdec-66d32f2a7b3d	NO	Not Available	Not Available	Not Available	15	-24686	Not Applicable	0	120	Not Available																									Not Available
TCGA-D5-6529	614	Alive	T3	N0	M0	Stage IIA				69	Discrepancy	TCGA-D5-6529	9c34830b-4d7f-4b41-9659-fbfc36c145c9	NO	Not Available	50	NO	9	-25394	Not Applicable	0	260	Not Available		TCGA-D5-6529-D28929	8f6e7fb1-f1f1-4c84-a677-d71f8713a584	Not Available	2	Not Available	502	oxaliplatinum+ 5-FU	Not Available	3	9	Not Available	Not Available	PROGRESSION	Not Applicable	Not Available	IV	YES	Chemotherapy	Not Available	1530+36000	mg	Not Available	2012	NOT HISPANIC OR LATINO
TCGA-AA-A02K	426	Dead	T4	N2	M1	Stage IV				50	Ascending Colon	TCGA-AA-A02K	10881458-55b2-41d1-8358-4ee6ccb8ec85	NO	Not Available	Not Available	Not Available	15	-18506	Not Applicable	0	0	Not Available		TCGA-AA-A02K-D37383;TCGA-AA-A02K-D37384;TCGA-AA-A02K-D37385;TCGA-AA-A02K-D37386	284D9612-89A5-4F4D-82AD-D73C214BF630;DA114F4F-D777-4640-A175-AC51FF4D0346;B72BBC44-9B88-4103-84CC-157C43ADFAE9;AD48478E-2CDC-4B13-B6E6-61CAE4FEE9E9	Not Available;Not Available;Not Available;Not Available	3;3;3;3	275;275;275;275	31;31;31;31	Folinic acid;5-Fluorouracil;Irinotecan;Bevacizumab	Clinical Progressive Disease;Clinical Progressive Disease;Clinical Progressive Disease;Clinical Progressive Disease	12;12;12;12	Not Available;Not Available;Not Available;Not Available	Not Available;Not Available;Not Available;Not Available	Not Available;Not Available;Not Available;Not Available	Not Available;Not Available;Not Available;Not Available	Not Applicable;Not Applicable;Not Applicable;Not Applicable	Not Available;Not Available;Not Available;Not Available	Not Available;Not Available;Not Available;Not Available	NO;NO;NO;NO	Chemotherapy;Chemotherapy;Chemotherapy;Targeted Molecular therapy	Not Available;Not Available;Not Available;Not Available	Not Available;Not Available;Not Available;Not Available	Not Available;Not Available;Not Available;Not Available	NO;NO;NO;NO	2012;2012;2012;2012	Not Available
TCGA-DM-A0XF	1162	Dead	T3	N2	M0	Stage IIIC				68	Discrepancy	TCGA-DM-A0XF	b823d6e5-54b0-43d3-95e2-9be33dc6f734	NO	Not Available	Not Available	Not Available	15	-25032	1162	0	Not Available	Not Available		TCGA-DM-A0XF-D30352;TCGA-DM-A0XF-D30353	85F76F5C-1C87-421C-AE2C-9346148FFA56;5A51E617-F6C8-4325-A8B3-8355D2A9C937	Not Available;Not Available	10;12	174;Not Available	45;201	Mayo 425-20;FOLFIRI	Complete Response;Unknown	4;4	Not Available;Not Available	Not Available;Not Available	Not Available;Not Available	Not Available;Not Available	Not Applicable;Not Applicable	Not Available;Not Available	Not Available;Not Available	NO;NO	Chemotherapy;Chemotherapy	Not Available;Not Available	Not Available;Not Available	Not Available;Not Available	NO;NO	2012;2012	NOT HISPANIC OR LATINO
TCGA-4T-AA8H	385	Alive	T3	N0	MX	Stage IIA				42	Descending Colon	TCGA-4T-AA8H	A5E14ADD-1552-4606-9FFE-3A03BCF76640	NO	Not Available	20	NO	5	-15494	Not Applicable	0	160	Not Available																									NOT HISPANIC OR LATINO
TCGA-AA-3811	306	Dead	T3	N2	M0	Stage III				84	Hepatic Flexure	TCGA-AA-3811	d7ebd11a-1339-4b28-be90-a788d2cfa706	NO	Not Available	Not Available	Not Available	18	-30893	Not Applicable	0	30	Not Available																									Not Available
TCGA-A6-5665	671	Alive	T3	N0	M0	Stage IIA				84	Ascending Colon	TCGA-A6-5665	4c6c8d3d-e4a3-490a-9211-cfbe7e6ee25b	YES	Abnormal	Not Available	YES	20	-30915	Not Applicable	0	286	Not Available																									NOT HISPANIC OR LATINO
TCGA-NH-A5IV	0	Alive	T3	N0	MX	Stage IIA				90	Transverse Colon	TCGA-NH-A5IV	CC22913D-2DDA-48BB-82AA-9960B73F3E44	NO	Not Available	30	NO	13	-32872	Not Applicable	0	0	Not Available																									NOT HISPANIC OR LATINO
TCGA-AA-3518	31	Alive	T3	N0	M0	Stage IIA				81	Cecum	TCGA-AA-3518	c5c4a0a5-900d-483d-9282-475654d63265	NO	Not Available	Not Available	Not Available	18	-29769	Not Applicable	0	31	Not Available																									Not Available
TCGA-3L-AA1B	475	Alive	T2	N0	M0	Stage I				61	Cecum	TCGA-3L-AA1B	A94E1279-A975-480A-93E9-7B1FF05CBCBF	NO	Not Available	Not Available	YES	22	-22379	Not Applicable	0	154	Not Available																									NOT HISPANIC OR LATINO
TCGA-D5-6898	229	Alive	T2	N0	M0	Stage I				51	Sigmoid Colon	TCGA-D5-6898	27e2438d-bd01-4c50-9102-563276ed9922	NO	Not Available	23	NO	18	-18874	Not Applicable	0	45	Not Available																									NOT HISPANIC OR LATINO
TCGA-AA-3502	1065	Alive	T2	N0	M0	Stage I				73	Transverse Colon	TCGA-AA-3502	8368d745-c74d-4236-ba75-16ca7aaeb3ca	NO	Not Available	Not Available	Not Available	18	-26724	Not Applicable	0	31	Not Available																									Not Available
TCGA-D5-6533	775	Alive	T4b	N0	M0					68	Transverse Colon	TCGA-D5-6533	fa83dfb5-7386-4a35-9861-aa866478d5f1	NO	Not Available	0	NO	15	-24971	Not Applicable	0	40	Not Available		TCGA-D5-6533-D34457	752BD87B-FBD0-4A45-AA82-C60FF3B4B3F3	Not Available	15	195	67	Oxaliplatin, Folinic acid, Fluorouracil	Complete Response	8	Not Available	Not Available	Not Available	Not Available	Not Applicable	Not Available	Not Available	NO	Chemotherapy	Not Available	Not Available	Not Available	NO	2012	NOT HISPANIC OR LATINO
TCGA-DM-A28H	3561	Alive	T3	N2	M0	Stage IIIC				50	Cecum	TCGA-DM-A28H	AEC0C661-AFAC-4F7A-8C31-154D743F2499	YES	Normal	Not Available	Not Available	27	-18325	Not Applicable	0	3423	Not Available																									NOT HISPANIC OR LATINO
TCGA-CM-5868	518	Alive	T4a	N1a	M1a	Stage IVA				59	Sigmoid Colon	TCGA-CM-5868	4aadf2a2-ce1e-4f94-b146-59292e83e7fd	YES	Normal	Not Available	NO	18	-21672	Not Applicable	0	304	Not Available		TCGA-CM-5868-D15265;TCGA-CM-5868-D15270;TCGA-CM-5868-D15266;TCGA-CM-5868-D15267;TCGA-CM-5868-D15269;TCGA-CM-5868-D15268	231ad9ed-6fbf-41e0-b7f6-f37b39bfe7c6;e1b8376b-e4a5-40b0-aa12-f2f19ef1d26a;91d3a944-24bc-4e79-9a0b-bcd64ee991b2;1071fb4b-8369-4469-8f2b-3263a3bd1f05;45dc93fc-8988-4181-bd98-c69db74aef7a;4f3182e8-b6a8-4457-b4c7-719105d866d1	Not Available;Not Available;Not Available;Not Available;Not Available;Not Available	15;15;15;15;15;15	Not Available;Not Available;Not Available;Not Available;Not Available;Not Available	31;316;45;45;316;78	Floxuridine;Fluorouracil;Oxaliplatin;Irinotecan HCl;Leucovorin;Dexamethasone	Not Available;Not Available;Not Available;Not Available;Not Available;Not Available	8;8;8;8;8;8	9;2;9;20;2;2	290;2200;180;260;850;25	mg;mg;mg;mg;mg;mg	ADJUVANT;ADJUVANT;ADJUVANT;ADJUVANT;ADJUVANT;ADJUVANT	Not Applicable;Not Applicable;Not Applicable;Not Applicable;Not Applicable;Not Applicable	1;1;1;1;1;1	IV;IV;IV;IV;IV;IV	YES;YES;YES;YES;YES;YES	Chemotherapy;Chemotherapy;Chemotherapy;Chemotherapy;Other, specify in notes;Other, specify in notes	Not Available;Not Available;Not Available;Not Available;Ancillary agent;Ancillary agent	1084;4400;1100;4160;1700;40	mg;mg;mg;mg;mg;mg	Not Available;Not Available;Not Available;Not Available;Not Available;Not Available	2011;2011;2011;2011;2011;2011	NOT HISPANIC OR LATINO
TCGA-AA-3542	395	Alive	T3	N2	M0	Stage IIIC				69	Sigmoid Colon	TCGA-AA-3542	9dcb4e16-b582-4cd0-87cf-04f480ec2cec	NO	Not Available	Not Available	Not Available	18	-25324	Not Applicable	0	0	Not Available		TCGA-AA-3542-D37453;TCGA-AA-3542-D37454;TCGA-AA-3542-D37455	977CAA41-165B-4CFC-966E-54A9B8400418;C5B20829-CD88-4658-A64D-378175527DD5;FA7BF379-E96D-4367-95B2-B00912AE20E1	Not Available;Not Available;Not Available	3;3;3	214;214;214	30;30;30	Folinic acid;5-Fluorouracil;Oxaliplatin	Complete Response;Complete Response;Complete Response	12;12;12	Not Available;Not Available;Not Available	Not Available;Not Available;Not Available	Not Available;Not Available;Not Available	Not Available;Not Available;Not Available	Not Applicable;Not Applicable;Not Applicable	Not Available;Not Available;Not Available	Not Available;Not Available;Not Available	NO;NO;NO	Chemotherapy;Chemotherapy;Chemotherapy	Not Available;Not Available;Not Available	Not Available;Not Available;Not Available	Not Available;Not Available;Not Available	NO;NO;NO	2012;2012;2012	Not Available
TCGA-A6-5667	887	Alive	T3	N1a	MX	Stage IIIB				40	Sigmoid Colon	TCGA-A6-5667	28d03569-8717-40da-8989-70baf2b18f9f	NO	Not Available	Not Available	NO	27	-14756	Not Applicable	0	320	Not Available		TCGA-A6-5667-D13423;TCGA-A6-5667-D13426;TCGA-A6-5667-D13424;TCGA-A6-5667-D13429	db0386f8-b893-4fa3-bd66-33eac054e066;b3dc8aab-d46f-4239-b2fa-2050e3721e71;1f9e7cb8-aa9f-439d-b187-ba5f32ace987;70fb07b7-8554-46f0-b865-ad8979c5ddba	Not Available;Not Available;Not Available;Not Available	27;27;27;27	160;223;223;225	62;62;62;62	Oxaliplatin;Leucovorin;5 FU;5FU	Not Available;Not Available;Not Available;Not Available	6;6;6;6	8;12;12;12	100-158;50-125;662-744;3974-4464	mg;mg;mg;mg	ADJUVANT;ADJUVANT;ADJUVANT;ADJUVANT	Not Applicable;Not Applicable;Not Applicable;Not Applicable	1;1;1;1	IV;IV;IV;IV	NO;NO;NO;NO	Chemotherapy;Other, specify in notes;Chemotherapy;Chemotherapy	Not Available;Ancillary;Not Available;Not Available	1026;925;8674;52044	mg;mg;mg;mg	Not Available;Not Available;Not Available;Not Available	2011;2011;2011;2011	NOT HISPANIC OR LATINO
TCGA-AA-3553	730	Alive	T2	N0	M0	Stage I				61	Sigmoid Colon	TCGA-AA-3553	d181c72b-843c-4b2d-b014-2a6dd1c3c1ec	NO	Not Available	Not Available	Not Available	18	-22524	Not Applicable	0	0	Not Available																									Not Available
TCGA-AD-6888	472	Dead	T3	N1b	M0	Stage IIIB				73	Hepatic Flexure	TCGA-AD-6888	13eff2e5-e33a-485f-9ba4-8a7ccb3c7528	NO	Not Available	90	YES	22	-26816	Not Applicable	0	155	Not Available																									NOT HISPANIC OR LATINO
TCGA-A6-2677	740	Dead	T3	N2	M0	Stage IIIC		FPPP	TCGA	68	Cecum	TCGA-A6-2677	d976782c-90c1-421d-b83c-7fc2617e2709	NO	Not Available	Not Available	NO	21	-25143	Not Applicable	0	541	Not Available		TCGA-A6-2677-D2516;TCGA-A6-2677-D2514;TCGA-A6-2677-D2518;TCGA-A6-2677-D2510	8bcbb764-ba22-4dca-98cb-b56141536845;fc790e21-4b95-4088-b256-6f1f47d9e46f;f63c40b8-a6dc-4a65-b2ed-e7b458fd120a;07c7b730-6602-4b6b-bb72-99d5b986f227	Not Available;Not Available;Not Available;Not Available	21;21;21;21	617;617;252;252	112;112;112;112	Leucovorin;5- FU;5-FU;Oxaliplatin	Not Available;Not Available;Not Available;Not Available	10;10;10;10	9;9;9;9	600;592-620;3552-3720;66-150	mg;mg;mg;mg	ADJUVANT;ADJUVANT;ADJUVANT;ADJUVANT	Not Applicable;Not Applicable;Not Applicable;Not Applicable	1;1;1;1	IV;IV;IV;IV	NO;NO;NO;NO	Other, specify in notes;Chemotherapy;Chemotherapy;Chemotherapy	Ancillary;Not Available;Not Available;Not Available	5400;5504;33,024;976	mg;mg;mg;mg	Not Available;Not Available;Not Available;Not Available	2010;2010;2010;2010	NOT HISPANIC OR LATINO
TCGA-DM-A28G	1849	Dead	T3	N0	M0	Stage IIA				75	Ascending Colon	TCGA-DM-A28G	FFA7E03A-4A3C-41F0-937A-4FB862FD2194	YES	Normal	Not Available	YES	27	-27641	1849	0	1849	Not Available																									NOT HISPANIC OR LATINO
TCGA-AA-3955	638	Alive	T2	N2a	M0	Stage IIIB				38	Descending Colon	TCGA-AA-3955	5c24435e-8e50-42c2-80c7-919b1cad0133	NO	Not Available	Not Available	Not Available	18	-14186	Not Applicable	0	0	Not Available		TCGA-AA-3955-D37378;TCGA-AA-3955-D37379	923A811E-F19F-43E7-84A9-1C1FBA0ABD65;CDACF96B-2A58-4F42-8195-990F0E68F7C0	Not Available;Not Available	3;3	181;150	28;28	Capecitabine;Oxaliplatin	Complete Response;Complete Response	12;12	Not Available;Not Available	Not Available;Not Available	Not Available;Not Available	Not Available;Not Available	Not Applicable;Not Applicable	Not Available;Not Available	Not Available;Not Available	NO;NO	Chemotherapy;Chemotherapy	Not Available;Not Available	Not Available;Not Available	Not Available;Not Available	NO;NO	2012;2012	Not Available
TCGA-AA-3952	61	Dead	T3	N2	M0	Stage IIIC				68	Descending Colon	TCGA-AA-3952	c1e141af-bdd1-4176-8c0e-cf1ab0c1d9d3	NO	Not Available	Not Available	Not Available	18	-24868	61	0	Not Available	Not Available																									Not Available
TCGA-AA-3821	31	Alive	T2	N0	M0	Stage I				81	Hepatic Flexure	TCGA-AA-3821	0e87e5fd-d5bb-4c0d-952d-711a6abbf336	NO	Not Available	Not Available	Not Available	18	-29706	Not Applicable	0	0	Not Available																									Not Available
TCGA-DM-A1D7			T3	N0	M0	Stage IIA				82	Sigmoid Colon	TCGA-DM-A1D7	fac2c617-8149-45bb-b766-fbe13dc3c425	YES	Normal	Not Available	Not Available	Not Available	-30142	Not Applicable	0	Not Available	0																									NOT HISPANIC OR LATINO
TCGA-AA-3655	1856	Alive	T3	N0	M0	Stage II				68	Sigmoid Colon	TCGA-AA-3655	31a3877d-3e82-450e-811f-3448b06f3950	NO	Not Available	Not Available	Not Available	18	-24896	Not Applicable	0	0	Not Available																									Not Available
TCGA-AA-A00Z	669	Alive	T3	N0	M0	Stage IIA				70	Sigmoid Colon	TCGA-AA-A00Z	af3a0634-4292-45bd-b948-6b6bd2d58090	NO	Not Available	Not Available	Not Available	15	-25872	Not Applicable	0	31	Not Available																									Not Available
TCGA-AA-A00D	578	Alive	T2	N0	M0	Stage I				70	Ascending Colon	TCGA-AA-A00D	081a3dc7-45e1-457d-add0-c4686140a8d0	NO	Not Available	Not Available	Not Available	15	-25689	Not Applicable	0	31	Not Available																									Not Available
TCGA-AZ-6600	368	Dead	T4	N1	M1	Stage IV				64	Hepatic Flexure	TCGA-AZ-6600	aee20b98-df51-4ead-86cc-0d5f60a74b90	Not Available	Not Available	Not Available	Not Available	30	-23581	368	0	Not Available	Not Available		TCGA-AZ-6600-D34149;TCGA-AZ-6600-D34150;TCGA-AZ-6600-D34151	B95F4311-53FF-4CA7-975C-9F2B508C6EA8;BC76525A-EFC5-4518-8284-ED321B464F5E;D03EF7A0-DCCB-4070-9D2D-89B401069535	Not Available;Not Available;Not Available	31;31;31	144;144;144	122;122;122	CPT-11;5-FU;Leucovorin	Clinical Progressive Disease;Clinical Progressive Disease;Clinical Progressive Disease	7;7;7	Not Available;Not Available;Not Available	Not Available;Not Available;Not Available	Not Available;Not Available;Not Available	Not Available;Not Available;Not Available	Not Applicable;Not Applicable;Not Applicable	Not Available;Not Available;Not Available	Not Available;Not Available;Not Available	NO;NO;NO	Chemotherapy;Chemotherapy;Chemotherapy	Not Available;Not Available;Not Available	Not Available;Not Available;Not Available	Not Available;Not Available;Not Available	NO;NO;NO	2012;2012;2012	NOT HISPANIC OR LATINO
TCGA-A6-6142	763	Alive	T3	N1a	M1a	Stage IVA				56	Sigmoid Colon	TCGA-A6-6142	c7c5348f-5708-45bf-b40e-1bf7c9348f60	NO	Not Available	Not Available	NO	21	-20485	Not Applicable	0	134	Not Available		TCGA-A6-6142-D28730;TCGA-A6-6142-D28729;TCGA-A6-6142-D28726;TCGA-A6-6142-D28727	16ab0b29-4834-4c89-aac1-63c46bbc2872;50512b15-54bb-4a84-b660-746ec73824f5;e3ae1ca9-0fc8-416c-b5b0-5b3bbebdb77b;698bfec7-fb37-43b9-aa00-8567f13f8a4a	Not Available;Not Available;Not Available;Not Available	26;28;28;28	340;338;338;338	142;142;142;142	Fluorouracil;Fluorouracil;Oxaliplatin;Leucovorin	Not Available;Not Available;Not Available;Not Available	2;2;2;2	12;12;12;12	2850-4512;494-752;95-150;50-752	mg;mg;mg;mg	ADJUVANT;ADJUVANT;ADJUVANT;ADJUVANT	Not Applicable;Not Applicable;Not Applicable;Not Applicable	1;1;1;1	IV;IV;IV;IV	NO;NO;NO;NO	Chemotherapy;Chemotherapy;Chemotherapy;Other, specify in notes	Not Available;Not Available;Not Available;Ancillary	44695;7545;1501;5048	mg;mg;mg;mg	Not Available;Not Available;Not Available;Not Available	2012;2012;2012;2012	NOT HISPANIC OR LATINO
TCGA-AA-A00A	1157	Alive	T3	N0	M0	Stage IIA				80	Ascending Colon	TCGA-AA-A00A	10628a61-bd5e-4415-af97-631c5ca320cb	NO	Not Available	Not Available	Not Available	15	-29463	Not Applicable	0	0	Not Available																									Not Available
TCGA-AM-5820	14	Alive	T4a	N2	M1	Stage IVA				59	Sigmoid Colon	TCGA-AM-5820	26a12266-c6d8-42f9-bd4e-5093d827ac9a	NO	Not Available	Not Available	NO	15	-21902	Not Applicable	0	14	Not Available																									NOT HISPANIC OR LATINO
TCGA-A6-2676	1305	Dead	T4	N0	M0	Stage IIB				75	Cecum	TCGA-A6-2676	89a6384e-1cea-440b-9f17-d57cb0805174	NO	Not Available	Not Available	NO	25	-27403	Not Applicable	0	447	Not Available		TCGA-A6-2676-D2539;TCGA-A6-2676-D2541;TCGA-A6-2676-D2538;TCGA-A6-2676-D2540	716560b1-bfca-4513-9253-66e8ce01bffa;108e080e-0872-4a94-9b2a-b8990dc5b718;6c3085ac-6d53-49fe-a8c0-4585b9ae2945;5b1553bb-4c01-431e-b6c3-32fd8f32636b	Not Available;Not Available;Not Available;Not Available	25;25;25;25	111;113;111;111	76;76;76;76	5- FU;5-FU;Oxaliplatin;Leucovorin	Not Available;Not Available;Not Available;Not Available	10;10;10;10	3;3;3;3	461-576;2765-3456;116-122;550-600	mg;mg;mg;mg	ADJUVANT;ADJUVANT;ADJUVANT;ADJUVANT	Not Applicable;Not Applicable;Not Applicable;Not Applicable	1;1;1;1	IV;IV;IV;IV	NO;NO;NO;NO	Chemotherapy;Chemotherapy;Chemotherapy;Other, specify in notes	Not Available;Not Available;Not Available;Ancillary	1581;9485;360;1750	mg;mg;mg;mg	Not Available;Not Available;Not Available;Not Available	2010;2010;2010;2010	NOT HISPANIC OR LATINO
TCGA-AA-3819	761	Alive	T3	N0	M0	Stage IIA				41	Sigmoid Colon	TCGA-AA-3819	192da41f-f0a5-494e-8eb9-96bcdae56ff8	NO	Not Available	Not Available	Not Available	18	-15280	Not Applicable	0	0	Not Available																									Not Available
TCGA-F4-6463	1087	Alive	T3	N0	M0	Stage IIA				51	Transverse Colon	TCGA-F4-6463	cbe23011-93b7-4e9f-b934-bd0122f91f54	NO	Not Available	Not Available	Not Available	20	-18804	Not Applicable	0	0	Not Available																									NOT HISPANIC OR LATINO
TCGA-DM-A28F	1094	Dead	T3	N1	M0	Stage IIIB				73	Sigmoid Colon	TCGA-DM-A28F	022F39E9-57EE-4B2B-8B3A-8929E3D69A37	YES	Normal	Not Available	YES	27	-26856	1094	0	1094	Not Available																									NOT HISPANIC OR LATINO
TCGA-A6-A5ZU	293	Alive	T3	N1	M0	Stage IIIB				59	Transverse Colon	TCGA-A6-A5ZU	4881A390-C4E4-48B4-AE66-140C64A87614	NO	Not Available	Not Available	NO	15	-21554	Not Applicable	0	117	Not Available		TCGA-A6-A5ZU-D51210;TCGA-A6-A5ZU-D51211;TCGA-A6-A5ZU-D51212;TCGA-A6-A5ZU-D51213	0A3C8862-F409-415A-AA9C-4FAF2B00D046;B0A001F1-04BE-42CE-827C-E68CCC501CA3;16A5338C-26CA-4F43-A103-F39855600088;8049EF92-87B1-4195-A843-E594E482D74A	Not Available;Not Available;Not Available;Not Available	13;13;13;13	245;272;272;274	105;105;105;105	Oxaliplatin;Leucovorin;Fluorouracil;Fluorouracil	Complete Response;Complete Response;Complete Response;Complete Response	11;11;11;11	Not Available;Not Available;Not Available;Not Available	Not Available;Not Available;Not Available;Not Available	Not Available;Not Available;Not Available;Not Available	Not Available;Not Available;Not Available;Not Available	Not Applicable;Not Applicable;Not Applicable;Not Applicable	Not Available;Not Available;Not Available;Not Available	Not Available;Not Available;Not Available;Not Available	NO;NO;NO;NO	Chemotherapy;Ancillary;Chemotherapy;Chemotherapy	Not Available;Not Available;Not Available;Not Available	Not Available;Not Available;Not Available;Not Available	Not Available;Not Available;Not Available;Not Available	NO;NO;NO;NO	2013;2013;2013;2013	NOT HISPANIC OR LATINO
TCGA-AA-3519	276	Alive	T3	N1	M0	Stage III				63	Sigmoid Colon	TCGA-AA-3519	09942e9f-c178-44bc-9cd9-f5bfa350b23f	NO	Not Available	Not Available	Not Available	18	-23131	Not Applicable	0	0	Not Available																									Not Available
TCGA-AA-3939	395	Alive	T3	N0	M0	Stage IIA				83	Ascending Colon	TCGA-AA-3939	81555ac5-9cc2-49ae-9033-657f56243f20	NO	Not Available	Not Available	Not Available	18	-30439	Not Applicable	0	30	Not Available																									Not Available
TCGA-A6-5657	962	Alive	T3	N1	M0	Stage IIIB				65	Discrepancy	TCGA-A6-5657	dbbee8f5-d83d-4195-85cf-f89d327da0a9	NO	Not Available	Not Available	NO	31	-23920	Not Applicable	0	367	Not Available		TCGA-A6-5657-D12386;TCGA-A6-5657-D12385;TCGA-A6-5657-D12384	5c18e079-5a69-4390-b00f-e806fc54ad99;06252ba3-ef9d-4962-b9fe-71a2a400610b;acfd75b3-5851-4076-9e2d-847babf77bf1	Not Available;Not Available;Not Available	31;31;31	54;54;54	40;40;40	Leucovorin;5 FU;Oxaliplatin	Not Available;Not Available;Not Available	5;5;5	1;1;1	1000-1050;1000-1055;178-179	mg;mg;mg	ADJUVANT;ADJUVANT;ADJUVANT	Not Applicable;Not Applicable;Not Applicable	1;1;1	IV;IV;IV	NO;NO;NO	Other, specify in notes;Chemotherapy;Chemotherapy	Leucovorin;Not Available;Not Available	3050;3055;357	mg;mg;mg	Not Available;Not Available;Not Available	2011;2011;2011	NOT HISPANIC OR LATINO
TCGA-AA-A02W	1247	Alive	T2	N0	M0	Stage I				73	Sigmoid Colon	TCGA-AA-A02W	73448b56-a6c6-4c98-a153-ab704261e073	NO	Not Available	Not Available	Not Available	15	-26693	Not Applicable	0	31	Not Available																									Not Available
TCGA-AA-A03F	0	Alive	T3	N2	M0	Stage III				90	Cecum	TCGA-AA-A03F	2a971e32-b0e7-4a3f-8c40-62d69c0307d8	NO	Not Available	Not Available	Not Available	15	-32873	Not Applicable	0	0	Not Available																									Not Available
TCGA-G4-6306	1359	Alive	T2	N0	M0					71	Ascending Colon	TCGA-G4-6306	303286c2-bc58-4bbb-9171-74cdb1d7f62f	NO	Not Available	15	NO	12	-26163	Not Applicable	0	1359	Not Available																									NOT HISPANIC OR LATINO
TCGA-DM-A1D6	570	Dead	T3	N0	M0	Stage IIA				88	Splenic Flexure	TCGA-DM-A1D6	eb191e71-4b6e-4c8d-8348-519be5a1e657	YES	Normal	Not Available	Not Available	Not Available	-32302	570	0	570	570																									NOT HISPANIC OR LATINO
TCGA-AA-A01D	334	Dead	T3	N2	M0	Stage IIIC				47	Sigmoid Colon	TCGA-AA-A01D	e2edbf3f-25d8-49aa-b656-2a59c3b99aeb	NO	Not Available	Not Available	Not Available	15	-17318	Not Applicable	0	30	Not Available		TCGA-AA-A01D-D37404;TCGA-AA-A01D-D37405;TCGA-AA-A01D-D37406;TCGA-AA-A01D-D37407;TCGA-AA-A01D-D37408;TCGA-AA-A01D-D37409	4F739C3B-57E6-4AB5-8F2A-79326FE773E6;C597CB1C-8B1F-4EAE-AACF-2ACB2C0B0267;9E59767B-446A-4F48-BFEF-20BDB4731B47;F2A4FAE7-D172-454F-8F86-44237D0514DF;2F4FDF3B-F5D5-4507-975B-07A38AC4D75C;45839A4B-3333-43FE-ABE2-E6FCFE5D837D	Not Available;Not Available;Not Available;Not Available;Not Available;Not Available	3;3;3;3;3;3	273;153;273;304;273;304	61;61;214;273;214;273	Capecitabine;Oxaliplatin;Irinotecan;Mitomycin;Bevacizumab;Panitumumab	Clinical Progressive Disease;Clinical Progressive Disease;Clinical Progressive Disease;Clinical Progressive Disease;Clinical Progressive Disease;Clinical Progressive Disease	12;12;12;12;12;12	Not Available;Not Available;Not Available;Not Available;Not Available;Not Available	Not Available;Not Available;Not Available;Not Available;Not Available;Not Available	Not Available;Not Available;Not Available;Not Available;Not Available;Not Available	Not Available;Not Available;Not Available;Not Available;Not Available;Not Available	Not Applicable;Not Applicable;Not Applicable;Not Applicable;Not Applicable;Not Applicable	Not Available;Not Available;Not Available;Not Available;Not Available;Not Available	Not Available;Not Available;Not Available;Not Available;Not Available;Not Available	NO;NO;NO;YES;NO;NO	Chemotherapy;Chemotherapy;Chemotherapy;Chemotherapy;Targeted Molecular therapy;Targeted Molecular therapy	Not Available;Not Available;Not Available;Not Available;Not Available;Not Available	Not Available;Not Available;Not Available;Not Available;Not Available;Not Available	Not Available;Not Available;Not Available;Not Available;Not Available;Not Available	NO;NO;NO;NO;NO;NO	2012;2012;2012;2012;2012;2012	Not Available
TCGA-A6-2679	1366	Alive	T3	N0		Stage IIB				73	Ascending Colon	TCGA-A6-2679	0f74d992-00da-4728-9564-086ca1b95921	NO	Not Available	Not Available	NO	14	-26820	Not Applicable	0	595	Not Available																									NOT HISPANIC OR LATINO
TCGA-AA-A01T	1005	Alive	T3	N1	M0	Stage III				63	Sigmoid Colon	TCGA-AA-A01T	f87c6dcc-1a9e-4df5-962c-1f946e2611f8	NO	Not Available	Not Available	Not Available	15	-23192	Not Applicable	0	31	Not Available		TCGA-AA-A01T-D37392;TCGA-AA-A01T-D37393	45AADB1F-5899-4657-BE24-711FD3CEFC2C;70E04694-EC9B-4596-B5C3-25BC492B1919	Not Available;Not Available	3;3	184;184	61;61	5-Fluorouracil;Folinic acid	Complete Response;Complete Response	12;12	Not Available;Not Available	Not Available;Not Available	Not Available;Not Available	Not Available;Not Available	Not Applicable;Not Applicable	Not Available;Not Available	Not Available;Not Available	NO;NO	Chemotherapy;Chemotherapy	Not Available;Not Available	Not Available;Not Available	Not Available;Not Available	NO;NO	2012;2012	Not Available
TCGA-CM-6676	337	Alive	T2	N0	M0	Stage I				82	Sigmoid Colon	TCGA-CM-6676	4138aca8-e085-45fb-b353-74852efe61bf	NO	Not Available	Not Available	NO	26	-30223	Not Applicable	0	153	Not Available																									NOT HISPANIC OR LATINO
TCGA-AZ-5403	1910	Dead	T3	N0	MX	Stage II				43	Sigmoid Colon	TCGA-AZ-5403	85a57cfe-f1c9-44d9-8b50-022c0d3438d1	Not Available	Not Available	65	Not Available	26	-15983	1910	0	Not Available	Not Available																									NOT HISPANIC OR LATINO
TCGA-AA-3488	153	Dead	T3	N2	M1	Stage IV				58	Sigmoid Colon	TCGA-AA-3488	6e9e0c2f-2ddb-40f1-8e8c-618119e62ec1	NO	Not Available	Not Available	Not Available	18	-21519	153	0	Not Available	Not Available																									Not Available
TCGA-G4-6626	1	Dead	T3	N0	M0	Stage IIA				90	Ascending Colon	TCGA-G4-6626	3aae5316-6a5d-4b83-9020-ad691d4edf99	Not Available	Not Available	Not Available	NO	1	-32871	1	0	Not Available	Not Available																									NOT HISPANIC OR LATINO
TCGA-CA-5797	383	Alive	T3	N0	M0	Stage IIA				56	Sigmoid Colon	TCGA-CA-5797	3e0c34cb-fca5-4bcf-a5c1-5a7d286dd072	Not Available	Not Available	Not Available	Not Available	2	-20662	Not Applicable	0	8	Not Available																									NOT HISPANIC OR LATINO
TCGA-AA-3521			T3	N0	M0	Stage II				87	Sigmoid Colon	TCGA-AA-3521	ad440651-a2de-4bb1-90da-1e5e8975ab59	NO	Not Available	Not Available	Not Available	18	-31805	Not Applicable	0	Discrepancy	Not Available																									Not Available
TCGA-AA-3976	791	Alive	T2	N1	M0	Stage IIIA				70	Sigmoid Colon	TCGA-AA-3976	14efca0c-882d-4fba-b15c-64af6e213b80	NO	Not Available	Not Available	Not Available	18	-25599	Not Applicable	0	0	Not Available		TCGA-AA-3976-D37436;TCGA-AA-3976-D37437;TCGA-AA-3976-D37438	71E44A11-E322-4B4A-9E01-EAA0DA75FD43;899F6FBF-C49A-43F7-9946-8B8993D26711;22945031-905D-47E4-814D-EB4815FCF8B5	Not Available;Not Available;Not Available	3;3;3	242;242;61	30;30;30	Folinic acid;5-Fluorouracil;Oxaliplatin	Complete Response;Complete Response;Complete Response	12;12;12	Not Available;Not Available;Not Available	Not Available;Not Available;Not Available	Not Available;Not Available;Not Available	Not Available;Not Available;Not Available	Not Applicable;Not Applicable;Not Applicable	Not Available;Not Available;Not Available	Not Available;Not Available;Not Available	NO;NO;NO	Chemotherapy;Chemotherapy;Chemotherapy	Not Available;Not Available;Not Available	Not Available;Not Available;Not Available	Not Available;Not Available;Not Available	NO;NO;NO	2012;2012;2012	Not Available
TCGA-D5-6929	408	Alive	T3	N1	M1	Stage IV				49	Sigmoid Colon	TCGA-D5-6929	64b0461f-038d-4712-948e-818dc2f10eef	NO	Not Available	Not Available	NO	21	-17919	Not Applicable	0	146	Not Available		TCGA-D5-6929-D29898	5EED9D54-58D8-44C3-ADFA-E95A41C3B1D7	Not Available	30	216	48	oxaliplatinum+5 fluorouracilum	Not Available	3	7+12	158.1+3720	mg/m2	ADJUVANT	Not Applicable	Not Available	IV	NO	Chemotherapy	Not Available	1106.7+44640	mg	Not Available	2012	NOT HISPANIC OR LATINO
TCGA-G4-6307	1674	Alive	T3	N1	M0	Stage IIIB				37	Sigmoid Colon	TCGA-G4-6307	568dbda7-88b5-4330-881f-dc5d6c7ce4ae	NO	Not Available	Not Available	YES	13	-13648	Not Applicable	0	1485	Not Available		TCGA-G4-6307-D21941;TCGA-G4-6307-D21942;TCGA-G4-6307-D21943	bcf0997e-092d-4457-9be6-90cb82e51bd4;716a76ab-cae0-4593-820b-39fdc2d598d4;14d134ef-0304-4361-99b3-d74891f94c8a	Not Available;Not Available;Not Available	25;25;25	229;187;229	47;47;47	Fluorouracil;Oxaliplatin;Leucovorin	Not Available;Not Available;Not Available	1;1;1	12;8;12	720;153;720	mg;mg;mg	ADJUVANT;ADJUVANT;ADJUVANT	Not Applicable;Not Applicable;Not Applicable	1;1;1	IV;IV;IV	NO;NO;NO	Chemotherapy;Chemotherapy;Chemotherapy	Not Available;Not Available;Not Available	8640;1056;8640	mg;mg;mg	Not Available;Not Available;Not Available	2012;2012;2012	NOT HISPANIC OR LATINO
TCGA-AZ-4315	1776	Alive	T3	N0	M0	Stage IIA				61	Cecum	TCGA-AZ-4315	de287a25-981d-49f8-81af-fe0300e4cd31	Not Available	Not Available	5	Not Available	21	-22340	Not Applicable	0	1334	Not Available																									NOT HISPANIC OR LATINO
TCGA-AZ-4614	172	Dead	T4a	N1	M1	Stage IVA				71	Not Available	TCGA-AZ-4614	3334201d-a3c0-45ec-a9ed-cf48cc8c38e8	Not Available	Not Available	Not Available	Not Available	21	-26267	172	0	Not Available	Not Available																									NOT HISPANIC OR LATINO
TCGA-AA-3532	882	Alive	T3	N0	M0	Stage IIA				63	Sigmoid Colon	TCGA-AA-3532	aa85d9e8-caa6-422c-95ce-780e4ac2a5e4	NO	Not Available	Not Available	Not Available	18	-23133	Not Applicable	0	0	Not Available																									Not Available
TCGA-AY-A69D	543	Alive	T3	N0	M0	Stage IIA				55	Transverse Colon	TCGA-AY-A69D	ACD51808-870C-4684-A2DE-AA0B058729E1	NO	Not Available	Not Available	NO	18	-20299	Not Applicable	0	168	Not Available																									NOT HISPANIC OR LATINO
TCGA-A6-5656	1001	Alive	T2	N0	M0	Stage I		FPPP	TCGA	74	Sigmoid Colon	TCGA-A6-5656	eb4e4e09-98b3-4e85-8dd2-75676ff2af14	NO	Not Available	Not Available	NO	15	-27184	Not Applicable	0	462	Not Available																									NOT HISPANIC OR LATINO
TCGA-AA-3529	0	Dead	T3	N2	M0	Stage IIIC				78	Sigmoid Colon	TCGA-AA-3529	bfb07784-693b-4c25-874e-4ad6e04a5d46	NO	Not Available	Not Available	Not Available	18	-28609	0	0	Not Available	Not Available																									Not Available
TCGA-AA-A02J	153	Dead	T3	N0	M1	Stage IV				70	Sigmoid Colon	TCGA-AA-A02J	73a142e1-8ac2-4cfe-b8cf-7e9dea64f488	NO	Not Available	Not Available	Not Available	15	-25749	153	0	Not Available	Not Available																									Not Available
TCGA-AA-3524	1096	Alive	T3	N0	M0	Stage II				85	Sigmoid Colon	TCGA-AA-3524	03efbc94-a43d-4db0-9377-e397348430a6	NO	Not Available	Not Available	Not Available	18	-31197	Not Applicable	0	0	Not Available																									Not Available
TCGA-A6-5659	926	Alive	T2	N0	M0	Stage I		FPPP	TCGA	82	Cecum	TCGA-A6-5659	98d45099-feae-4dad-aa38-ec03fed6d999	NO	Not Available	Not Available	YES	26	-30028	Not Applicable	0	286	Not Available																									NOT HISPANIC OR LATINO
TCGA-AA-3877	943	Alive	T1	N0	M0	Stage I				83	Transverse Colon	TCGA-AA-3877	043a4745-566b-4106-b159-99cb8b394b81	NO	Not Available	Not Available	Not Available	18	-30377	Not Applicable	0	30	Not Available																									Not Available
TCGA-CM-5861	457	Alive	T3	N0	M0	Stage IIA				63	Cecum	TCGA-CM-5861	9743d31a-ea8f-4847-87d2-ebf77cc5983d	Not Available	Not Available	Not Available	NO	18	-23253	Not Applicable	0	335	Not Available																									NOT HISPANIC OR LATINO
TCGA-AZ-4684	1977	Alive	T3	N2	M1	Stage IVA				49	Not Available	TCGA-AZ-4684	cac80259-3a26-4a99-b0d3-13454068e6ed	Not Available	Not Available	34	Not Available	23	-18252	Not Applicable	0	1705	Not Available		TCGA-AZ-4684-D30846	2bb28cde-e6d2-4b5b-be40-2e267a44ce8b	Not Available	25	Not Available	22	Folfox	Clinical Progressive Disease	4	Not Available	Not Available	Not Available	Not Available	Not Applicable	Not Available	Not Available	NO	Chemotherapy	Not Available	Not Available	Not Available	NO	2012	NOT HISPANIC OR LATINO
TCGA-CM-6678	335	Alive	T4a	N1c	M1a	Stage IVA				63	Sigmoid Colon	TCGA-CM-6678	d7048098-09b3-4763-ad54-9c5c6fe14bc0	YES	Normal	Not Available	NO	Not Available	-23070	Not Applicable	0	122	Not Available		TCGA-CM-6678-D30951;TCGA-CM-6678-D30953;TCGA-CM-6678-D17051;TCGA-CM-6678-D17050;TCGA-CM-6678-D17049	e903ec03-d66a-4f5b-87a8-e1e78e0e79e6;fbd5870c-73a8-401f-a792-4a7aeda61922;f1e0900b-3a55-4d01-b8ed-d23892afb723;0452e18b-530a-40c8-bd25-d973c1784af8;01518ad8-5c28-40d7-8e5f-2d15a4df5355	Not Available;Not Available;Not Available;Not Available;Not Available	19;19;19;19;19	275;306;214;91;214	275;275;17;30;0	Floxuridine;IRINOtecan HCl;Irinotecan HCL;Oxaliplatin;Floxuridine	Unknown;Unknown;Not Available;Not Available;Not Available	4;4;4;4;4	Not Available;Not Available;12;7;7	Not Available;Not Available;200;130;170	Not Available;Not Available;mg;mg;mg	Not Available;Not Available;ADJUVANT;ADJUVANT;ADJUVANT	Not Applicable;Not Applicable;Not Applicable;Not Applicable;Not Applicable	Not Available;Not Available;1;1;1	Not Available;Not Available;IV;IV;IH	NO;NO;NO;NO;NO	Chemotherapy;Chemotherapy;Chemotherapy;Chemotherapy;Chemotherapy	Not Available;Not Available;Not Available;Not Available;Not Available	Not Available;Not Available;2040;770;475	Not Available;Not Available;mg;mg;mg	NO;NO;Not Available;Not Available;Not Available	2012;2012;2012;2012;2012	NOT HISPANIC OR LATINO
TCGA-AA-3522	1127	Alive	T3	N0	M0	Stage IIA				67	Ascending Colon	TCGA-AA-3522	d7ba64d7-b4e5-488d-9f28-bcb7bf3c0f35	NO	Not Available	Not Available	Not Available	18	-24653	Not Applicable	0	0	Not Available																									Not Available
TCGA-F4-6805	1047	Alive	T3	N0	M0	Stage IIA				58	Descending Colon	TCGA-F4-6805	e76258b7-e13a-4b05-855b-d792701ffba1	NO	Not Available	Not Available	NO	25	-21241	Not Applicable	0	16	Not Available		TCGA-F4-6805-D35065	8EEA3753-54B7-4A29-9F52-588A974F7AA9	Not Available	14	111	29	Xeloda	Complete Response	9	Not Available	Not Available	Not Available	Not Available	Not Applicable	Not Available	Not Available	NO	Chemotherapy	Not Available	Not Available	Not Available	NO	2012	NOT HISPANIC OR LATINO
TCGA-CK-4950	2599	Alive	T3	N1	M0	Stage IIIB				68	Cecum	TCGA-CK-4950	c293a148-a88c-4fb3-b2f4-e64e918044f9	NO	Not Available	25	NO	1	-24944	Not Applicable	0	1227	Not Available		TCGA-CK-4950-D9825;TCGA-CK-4950-D72393;TCGA-CK-4950-D72394;TCGA-CK-4950-D72395	c3ab7778-ee30-49f8-8136-659414100e0f;1AC65ADB-8FFA-41F4-B7F5-36245EE1E553;A516255A-FACF-432D-BCC2-21F20A2A4338;41B9C695-3F5C-4EC0-B94D-60E1AE573021	Not Available;Not Available;Not Available;Not Available	1;9;9;9	259;237;237;237	49;49;49;49	FolFox;Oxaliplatin;Leucovorin;Fluorouracil	Not Available;Complete Response;Complete Response;Complete Response	4;6;6;6	11;Not Available;Not Available;Not Available	2280;Not Available;Not Available;Not Available	mg;Not Available;Not Available;Not Available	ADJUVANT;Not Available;Not Available;Not Available	Not Applicable;Not Applicable;Not Applicable;Not Applicable	Not Available;Not Available;Not Available;Not Available	IV;Not Available;Not Available;Not Available	NO;NO;NO;NO	Chemotherapy;Chemotherapy;Ancillary;Chemotherapy	Not Available;Not Available;Not Available;Not Available	Not Available;Not Available;Not Available;Not Available	Not Available;Not Available;Not Available;Not Available	Not Available;NO;NO;NO	2011;2015;2015;2015	NOT HISPANIC OR LATINO
TCGA-D5-6923	378	Alive	T2	N0	M0	Stage I				57	Sigmoid Colon	TCGA-D5-6923	b3c267aa-345d-40d8-a8da-f9f08c64f9c7	NO	Not Available	10	NO	16	-21118	Not Applicable	0	43	Not Available																									NOT HISPANIC OR LATINO
TCGA-G4-6298	0	Dead	T4a	N1	MX	Stage IIIB				90	Cecum	TCGA-G4-6298	ab9cc98a-86ae-4913-bcb2-cc3aeff8abb1	NO	Not Available	Not Available	NO	30	-32873	0	0	Not Available	Not Available		TCGA-G4-6298-D21968;TCGA-G4-6298-D21967	b201fb4c-7422-447a-87c1-c46516ed2b91;4b271363-fb42-41fc-ba0a-4a1866ebd1d7	Not Available;Not Available	20;20	0;0	0;0	Irinotecan;Erbitux	Not Available;Not Available	1;1	4;4	176;440	mg;mg	PROGRESSION;PROGRESSION	Not Applicable;Not Applicable	1;1	IV;IV	NO;NO	Chemotherapy;Chemotherapy	Not Available;Not Available	704;1760	mg;mg	Not Available;Not Available	2012;2012	NOT HISPANIC OR LATINO
TCGA-CM-4748	792	Alive	T4a	N1a	M0	Stage IIIB				53	Transverse Colon	TCGA-CM-4748	cd845618-4cc4-49c2-9055-c171d4c24ee1	NO	Not Available	Not Available	NO	10	-19509	Not Applicable	0	214	Not Available		TCGA-CM-4748-D8952;TCGA-CM-4748-D8951;TCGA-CM-4748-D8954;TCGA-CM-4748-D8953;TCGA-CM-4748-D33829;TCGA-CM-4748-D33830;TCGA-CM-4748-D33832;TCGA-CM-4748-D33833;TCGA-CM-4748-D33835;TCGA-CM-4748-D33837;TCGA-CM-4748-D33838	3ff80bdd-5baf-45b1-a8ff-9fddc1b4a34f;b1b3b1e6-0123-4bf9-96d0-4ce2774d4221;5087eeea-c516-4cce-a7cb-06359bc561a4;1c8484ba-c8e5-4fdb-a458-c6da76730125;6589D529-DF32-4845-817C-4B19554CF287;276FBB94-B1E7-4154-961B-0B78CE2BCFBE;711D3DA5-341B-4192-9BEE-893C7345A568;575D70B6-ED2E-42D8-8622-7DE4314F43B0;76DE2CCB-26BA-4C2B-AD02-F3CEE6D3643A;A0608323-E407-4B3A-8409-32F07626D6C4;BD739F62-0557-4954-8F18-02B97…	Not Available;Not Available;Not Available;Not Available;Not Available;Not Available;Not Available;Not Available;Not Available;Not Available;Not Available	17;17;17;17;19;19;19;19;19;19;19	229;229;229;229;214;365;335;518;518;Not Available;Not Available	75;75;75;75;153;276;304;396;396;670;670	Fluorouracil;Fluorouracil;Oxaliplatin;Leucovorin;Oxaliplatin;IRINOtecan HCl;BEVACIZumab;Floxuridine;Leucovorin Calcium;CETUXimab;IRINOtecan HCl	Not Available;Not Available;Not Available;Not Available;Stable Disease;Stable Disease;Stable Disease;Stable Disease;Stable Disease;Not Applicable;Not Applicable	1;1;1;1;7;7;7;7;7;7;7	12;12;12;12;Not Available;Not Available;Not Available;Not Available;Not Available;Not Available;Not Available	850;2500-2502.1;95-180;850;Not Available;Not Available;Not Available;Not Available;Not Available;Not Available;Not Available	mg;mg;mg;mg;Not Available;Not Available;Not Available;Not Available;Not Available;Not Available;Not Available	ADJUVANT;ADJUVANT;ADJUVANT;ADJUVANT;Not Available;Not Available;Not Available;Not Available;Not Available;Not Available;Not Available	Not Applicable;Not Applicable;Not Applicable;Not Applicable;Not Applicable;Not Applicable;Not Applicable;Not Applicable;Not Applicable;Not Applicable;Not Applicable	1;1;1;1;Not Available;Not Available;Not Available;Not Available;Not Available;Not Available;Not Available	IV;IV;IV;IV;Not Available;Not Available;Not Available;Not Available;Not Available;Not Available;Not Available	NO;NO;NO;NO;NO;NO;NO;NO;NO;YES;YES	Chemotherapy;Chemotherapy;Chemotherapy;Other, specify in notes;Chemotherapy;Chemotherapy;Chemotherapy;Chemotherapy;Ancillary;Chemotherapy;Chemotherapy	Not Available;Not Available;Not Available;Ancillary;Not Available;Not Available;Not Available;Not Available;Not Available;Not Available;Not Available	10200;30010.5;185;10200;Not Available;Not Available;Not Available;Not Available;Not Available;Not Available;Not Available	mg;mg;mg;mg;Not Available;Not Available;Not Available;Not Available;Not Available;Not Available;Not Available	Not Available;Not Available;Not Available;Not Available;NO;NO;NO;NO;NO;NO;NO	2011;2011;2011;2011;2012;2012;2012;2012;2012;2012;2012	NOT HISPANIC OR LATINO
TCGA-A6-5661	1020	Alive	T3	N0	M0	Stage IIA				80	Ascending Colon	TCGA-A6-5661	4beee9d4-ee52-4fed-bcc4-d300f5ddd4d0	NO	Not Available	Not Available	YES	27	-29446	Not Applicable	0	306	Not Available																									NOT HISPANIC OR LATINO
TCGA-AA-3844	454	Alive	T3	N2	M0	Stage IIIC				78	Sigmoid Colon	TCGA-AA-3844	4f786107-3cf5-4ab3-bba4-f399dee23f0e	NO	Not Available	Not Available	Not Available	18	-28521	Not Applicable	0	28	Not Available		TCGA-AA-3844-D37478;TCGA-AA-3844-D37479;TCGA-AA-3844-D37480;TCGA-AA-3844-D37481;TCGA-AA-3844-D37482	44AB9D89-3E3C-461B-ADFD-22214943A595;E2943FD1-7025-4ADC-A4C1-E1DA1ABA85AF;69922414-9463-4B03-9D7F-D4E028CF5C63;0984FEF0-6099-46AD-9223-E34AFE4BC94C;BAC19AFA-78D6-45CA-B1DB-BC08D71E505E	Not Available;Not Available;Not Available;Not Available;Not Available	3;3;3;3;3	59;424;424;424;393	59;393;393;393;393	Capecitabine;Folinic acid;5-Fluorouracil;Oxaliplatin;Bevacizumab	Clinical Progressive Disease;Clinical Progressive Disease;Clinical Progressive Disease;Clinical Progressive Disease;Clinical Progressive Disease	12;12;12;12;12	Not Available;Not Available;Not Available;Not Available;Not Available	Not Available;Not Available;Not Available;Not Available;Not Available	Not Available;Not Available;Not Available;Not Available;Not Available	Not Available;Not Available;Not Available;Not Available;Not Available	Not Applicable;Not Applicable;Not Applicable;Not Applicable;Not Applicable	Not Available;Not Available;Not Available;Not Available;Not Available	Not Available;Not Available;Not Available;Not Available;Not Available	NO;NO;NO;NO;NO	Chemotherapy;Chemotherapy;Chemotherapy;Chemotherapy;Targeted Molecular therapy	Not Available;Not Available;Not Available;Not Available;Not Available	Not Available;Not Available;Not Available;Not Available;Not Available	Not Available;Not Available;Not Available;Not Available;Not Available	NO;NO;NO;NO;NO	2012;2012;2012;2012;2012	Not Available
TCGA-AA-3982	822	Alive	T3	N1	M0	Stage IIIB				75	Sigmoid Colon	TCGA-AA-3982	5a195baa-2d05-4273-a7c4-64cc816b0406	NO	Not Available	Not Available	Not Available	18	-27608	Not Applicable	0	0	Not Available																									Not Available
TCGA-D5-6536	543	Alive	T3	N0	M0	Stage IIA				73	Sigmoid Colon	TCGA-D5-6536	e83e5700-f968-4978-bb78-56a83936ce8c	NO	Not Available	11	NO	9	-26890	Not Applicable	0	287	Not Available		TCGA-D5-6536-D28926	16cf1090-853e-4a5c-8ba5-6eb873d29def	Not Available	3	Not Available	539	5-FU	Not Available	2	1	425	mg/m2/day	PALLIATIVE	Not Applicable	Not Available	IV	YES	Chemotherapy	Not Available	3750	mg	Not Available	2012	NOT HISPANIC OR LATINO
TCGA-AA-A01K	943	Alive	T3	N2	M0	Stage IIIC				74	Sigmoid Colon	TCGA-AA-A01K	a72dd578-3a6f-4807-a843-4a942500944e	NO	Not Available	Not Available	Not Available	15	-27029	Not Applicable	0	31	Not Available		TCGA-AA-A01K-D37397;TCGA-AA-A01K-D37398;TCGA-AA-A01K-D37399	3A2C3BC3-3631-4F1C-BB13-DAC6A294936E;6796D8BC-15FF-4367-ADF9-C70A1F2D542B;4BEE62E4-B052-4D7B-B1AE-7020CE37EC3F	Not Available;Not Available;Not Available	3;3;3	243;243;243	61;61;61	Folinic acid;5-Fluorouracil;Oxaliplatin	Complete Response;Complete Response;Complete Response	12;12;12	Not Available;Not Available;Not Available	Not Available;Not Available;Not Available	Not Available;Not Available;Not Available	Not Available;Not Available;Not Available	Not Applicable;Not Applicable;Not Applicable	Not Available;Not Available;Not Available	Not Available;Not Available;Not Available	NO;NO;NO	Chemotherapy;Chemotherapy;Chemotherapy	Not Available;Not Available;Not Available	Not Available;Not Available;Not Available	Not Available;Not Available;Not Available	NO;NO;NO	2012;2012;2012	Not Available
TCGA-DM-A28A	805	Dead	T3	N2	M0	Stage IIIC				78	Cecum	TCGA-DM-A28A	9B2C325C-1F03-43C7-AD5C-B49C6D205635	YES	Normal	Not Available	Not Available	27	-28833	805	0	805	Not Available																									NOT HISPANIC OR LATINO
TCGA-D5-6924	435	Alive	T3	N0	M0	Stage IIA				68	Sigmoid Colon	TCGA-D5-6924	be85f845-b281-467c-8b97-bed7b7fdff64	NO	Not Available	Not Available	NO	21	-24964	Not Applicable	0	89	Not Available																									NOT HISPANIC OR LATINO
TCGA-A6-5660	888	Alive	T3	N2b	M0	Stage IIIC				73	Cecum	TCGA-A6-5660	0dc41cd5-0672-407c-9b4a-0f5f3970aa54	NO	Not Available	Not Available	YES	31	-26803	Not Applicable	0	342	Not Available		TCGA-A6-5660-D12435;TCGA-A6-5660-D12415;TCGA-A6-5660-D12418;TCGA-A6-5660-D12432	5f1e45b0-0859-4efb-a7e5-efb825e22fc3;609032be-e6d6-428c-909f-f0ba7b2bf342;ef6fde9e-c1b4-4576-aacb-a8869a522738;75cb6eb3-4e9a-421e-a611-3bb290130d80	Not Available;Not Available;Not Available;Not Available	1;1;1;1	243;201;243;245	82;82;82;82	Leucovorin;Oxaliplatin;5FU;5 FU	Not Available;Not Available;Not Available;Not Available	6;6;6;6	12;9;12;12	50-800;131-173;804-820;4824-4920	mg;mg;mg;mg	ADJUVANT;ADJUVANT;ADJUVANT;ADJUVANT	Not Applicable;Not Applicable;Not Applicable;Not Applicable	1;1;1;1	IV;IV;IV;IV	NO;NO;NO;NO	Other, specify in notes;Chemotherapy;Chemotherapy;Chemotherapy	Ancillary;Not Available;Not Available;Not Available	1350;1509;9752;58512	mg;mg;mg;mg	Not Available;Not Available;Not Available;Not Available	2011;2011;2011;2011	NOT HISPANIC OR LATINO
TCGA-AA-3692	1095	Dead	T3	N2	M1	Stage IV				47	Splenic Flexure	TCGA-AA-3692	bce3ce45-4fb3-4d8e-9ec7-d24427c2ba4d	NO	Not Available	Not Available	Not Available	18	-17167	Not Applicable	0	0	Not Available		TCGA-AA-3692-D37486;TCGA-AA-3692-D37487;TCGA-AA-3692-D37488;TCGA-AA-3692-D37489;TCGA-AA-3692-D37490	C5BC9915-EBBF-4648-A0FA-9F09297020A2;781EDB20-2832-4C12-A42B-CA09749FD454;CFE1096A-3879-429A-8A98-B8F0C2BBD23B;FDE51FAB-DA6B-4B36-A1E9-31903F8BBFDA;086DF84A-9DAF-4E7C-8F35-043714901C01	Not Available;Not Available;Not Available;Not Available;Not Available	3;3;3;3;3	669;669;883;669;883	31;31;31;31;883	Folinic acid;5-Fluorouracil;Irinotecan;Bevacizumab;Cetuximab	Clinical Progressive Disease;Clinical Progressive Disease;Clinical Progressive Disease;Clinical Progressive Disease;Clinical Progressive Disease	12;12;12;12;12	Not Available;Not Available;Not Available;Not Available;Not Available	Not Available;Not Available;Not Available;Not Available;Not Available	Not Available;Not Available;Not Available;Not Available;Not Available	Not Available;Not Available;Not Available;Not Available;Not Available	Not Applicable;Not Applicable;Not Applicable;Not Applicable;Not Applicable	Not Available;Not Available;Not Available;Not Available;Not Available	Not Available;Not Available;Not Available;Not Available;Not Available	NO;NO;NO;NO;NO	Chemotherapy;Chemotherapy;Chemotherapy;Targeted Molecular therapy;Targeted Molecular therapy	Not Available;Not Available;Not Available;Not Available;Not Available	Not Available;Not Available;Not Available;Not Available;Not Available	Not Available;Not Available;Not Available;Not Available;Not Available	NO;NO;NO;NO;NO	2012;2012;2012;2012;2012	Not Available
TCGA-A6-A565	494	Dead	T3	N2	MX	Stage IIIC				34	Transverse Colon	TCGA-A6-A565	DD7A53EE-CB08-40C4-9935-51D1CA17E9E8	Unknown	Not Available	Not Available	YES	12	-12526	494	0	Not Available	Not Available		TCGA-A6-A565-D42141;TCGA-A6-A565-D42143;TCGA-A6-A565-D42144	9F6660B3-7566-45BC-8FAC-96CC0EFC39B4;297A845E-BC66-4A57-9FFD-7244BD48D447;5BD8C24D-85AD-4D45-8D64-5DF0775A2B08	Not Available;Not Available;Not Available	12;12;12	Not Available;Not Available;Not Available	Not Available;Not Available;Not Available	5FU;Leucovorin;Oxaliplatin	Clinical Progressive Disease;Clinical Progressive Disease;Clinical Progressive Disease	4;4;4	Not Available;Not Available;Not Available	Not Available;Not Available;Not Available	Not Available;Not Available;Not Available	Not Available;Not Available;Not Available	Not Applicable;Not Applicable;Not Applicable	Not Available;Not Available;Not Available	Not Available;Not Available;Not Available	NO;NO;NO	Chemotherapy;Ancillary;Chemotherapy	Not Available;Not Available;Not Available	Not Available;Not Available;Not Available	Not Available;Not Available;Not Available	NO;NO;NO	2013;2013;2013	Unknown
TCGA-A6-6653	742	Alive	T2	N0	M0	Stage I				82	Ascending Colon	TCGA-A6-6653	68801d41-535f-4b38-989b-ef4fe5f00039	YES	Abnormal	Not Available	NO	10	-29996	Not Applicable	0	91	Not Available																									NOT HISPANIC OR LATINO
TCGA-A6-6649	735	Alive	T3	N1b	M0	Stage IIIB				66	Discrepancy	TCGA-A6-6649	39b6ae01-c97b-4234-8a28-208fdf170432	NO	Not Available	Not Available	YES	9	-24237	Not Applicable	0	147	Not Available		TCGA-A6-6649-D19132;TCGA-A6-6649-D19131;TCGA-A6-6649-D19161;TCGA-A6-6649-D19176	e68051a4-b42e-43a5-9114-81f73b2852ff;b90ac8b4-29d6-490c-bacc-1b28fc09e6ca;6d48ab98-3956-42ff-b409-3acaa4fe5334;5a80c12d-0cbd-4019-9d7c-d07152df3d3d	Not Available;Not Available;Not Available;Not Available	2;2;5;5	145;68;147;145	68;68;68;68	Fluorouracil;Oxaliplatin;Fluorouracil;Leucovorin	Not Available;Not Available;Not Available;Not Available	12;12;12;12	6;1;6;6	664-948;197;3982-5688;50-175	mg;mg;mg;mg	ADJUVANT;ADJUVANT;ADJUVANT;ADJUVANT	Not Applicable;Not Applicable;Not Applicable;Not Applicable	1;1;1;1	IV;IV;IV;IV	NO;NO;NO;NO	Chemotherapy;Chemotherapy;Chemotherapy;Other, specify in notes	Not Available;Not Available;Not Available;Ancillary	4713;197;28277;575	mg;mg;mg;mg	Not Available;Not Available;Not Available;Not Available	2011;2011;2011;2011	NOT HISPANIC OR LATINO
TCGA-AA-3866	518	Alive	T2	N0	M0	Stage I				78	Cecum	TCGA-AA-3866	02f9668c-71e6-485f-88b1-b37dc8bdd2ab	NO	Not Available	Not Available	Not Available	18	-28672	Not Applicable	0	0	Not Available																									Not Available
TCGA-CM-5348	699	Alive	T3	N1a	M0	Stage IIIB				72	Cecum	TCGA-CM-5348	b89267a4-0e6b-401e-85b0-e66775858aa6	NO	Not Available	Not Available	YES	3	-26543	Not Applicable	0	393	Not Available																									NOT HISPANIC OR LATINO
TCGA-A6-2682	424	Dead	T4b	N1	M1	Stage IV				70	Discrepancy	TCGA-A6-2682	77a44132-af22-4115-9fa2-78f2f74bf687	NO	Not Available	Not Available	NO	28	-25683	424	0	Not Available	Not Available		TCGA-A6-2682-D6910;TCGA-A6-2682-D6907;TCGA-A6-2682-D6909;TCGA-A6-2682-D6905;TCGA-A6-2682-D6906;TCGA-A6-2682-D6911;TCGA-A6-2682-D6908;TCGA-A6-2682-D6912	6daa7738-34ec-47e4-b489-6b1935932b6d;22f90f8f-9bd8-4e02-b69d-306207facef8;450d6b36-99fe-499b-93bc-548de8a785d9;06febf7e-3cba-45b5-a1fb-b6935217ea74;f0e8ad72-519f-4d7a-806d-4c861525fef7;273a2571-4f64-4350-b5d6-02ac929b2184;6d41c707-6c72-4ead-9e68-6677b9ae902d;ce77ae94-e1dc-41e4-989a-8891fd070a58	Not Available;Not Available;Not Available;Not Available;Not Available;Not Available;Not Available;Not Available	28;28;28;28;28;28;1;1	282;106;282;106;106;282;108;284	231;43;231;43;43;231;43;231	5 FU;5 FU;Oxaliplatin;Oxaliplatin;Leucovorin;Leucovorin;5 FU;5 FU	Not Available;Not Available;Not Available;Not Available;Not Available;Not Available;Not Available;Not Available	1;1;1;1;1;1;2;2	4;5;4;5;5;4;5;4	420-856;400-836;89-182;100-178;400-850;400-850;2000-5000;2500-5136	mg;mg;mg;mg;mg;mg;mg;mg	ADJUVANT;ADJUVANT;ADJUVANT;ADJUVANT;ADJUVANT;ADJUVANT;ADJUVANT;ADJUVANT	Not Applicable;Not Applicable;Not Applicable;Not Applicable;Not Applicable;Not Applicable;Not Applicable;Not Applicable	2;1;2;1;1;2;1;2	IV;IV;IV;IV;IV;IV;IV;IV	NO;NO;NO;NO;NO;NO;NO;NO	Chemotherapy;Chemotherapy;Chemotherapy;Chemotherapy;Other, specify in notes;Other, specify in notes;Chemotherapy;Chemotherapy	Not Available;Not Available;Not Available;Not Available;Ancillary;Ancillary;Not Available;Not Available	2972;3310;631;783;3350;2950;19,021;17812	mg;mg;mg;mg;mg;mg;mg;mg	Not Available;Not Available;Not Available;Not Available;Not Available;Not Available;Not Available;Not Available	2011;2011;2011;2011;2011;2011;2011;2011	NOT HISPANIC OR LATINO
TCGA-CM-6680	366	Alive	T3	N2a	M0	Stage IIIB				78	Cecum	TCGA-CM-6680	fb9e7684-a7f7-4f17-bc5d-1f359e1b0d42	NO	Not Available	Not Available	NO	Not Available	-28701	Not Applicable	0	91	Not Available																									NOT HISPANIC OR LATINO
TCGA-AA-3495	1127	Alive	T2	N0	M0	Stage I				79	Hepatic Flexure	TCGA-AA-3495	15b987ba-77ab-477b-a54a-65ec5c7c399e	NO	Not Available	Not Available	Not Available	18	-28886	Not Applicable	0	31	Not Available																									Not Available
TCGA-AA-A01S	31	Alive	T3	N1	M0	Stage III				47	Sigmoid Colon	TCGA-AA-A01S	84e34cf2-b3bb-4a1a-8fb7-6c2c604c4008	NO	Not Available	Not Available	Not Available	15	-17257	Not Applicable	0	31	Not Available																									Not Available
TCGA-CM-4743	701	Alive	T3	N0	M0	Stage IIA				69	Hepatic Flexure	TCGA-CM-4743	c8d7eb0f-2502-4277-a8ef-435b08f3c863	NO	Not Available	Not Available	NO	24	-25291	Not Applicable	0	184	Not Available		TCGA-CM-4743-D8949	84924e2f-cab0-49c8-988d-1c3f4b53769a	Not Available	17	235	108	Capecitabine	Not Available	1	6	1500	mg	ADJUVANT	Not Applicable	1	PO	NO	Chemotherapy	Not Available	9000	mg	Not Available	2011	NOT HISPANIC OR LATINO
TCGA-G4-6323	419	Alive	Tis	N0	MX	Stage IA				50	Cecum	TCGA-G4-6323	0c463362-7925-4d9a-9d63-098b50af2fb9	NO	Not Available	Not Available	NO	13	-18334	Not Applicable	0	201	Not Available																									NOT HISPANIC OR LATINO
TCGA-CK-5912	1493	Dead	T2	N0	MX	Stage I				81	Cecum	TCGA-CK-5912	c085da47-d634-491a-80ea-514e5a231f70	NO	Not Available	140	YES	Not Available	-29938	Not Applicable	0	1466	Not Available																									NOT HISPANIC OR LATINO
TCGA-AA-A01C	457	Alive	T2	N1	M0	Stage IIIA				75	Ascending Colon	TCGA-AA-A01C	80809d79-92e1-4d6c-ba2e-0a9589997792	NO	Not Available	Not Available	Not Available	15	-27729	Not Applicable	0	30	Not Available																									Not Available
TCGA-AA-A00R	30	Alive	T2	N0	M0	Stage I				64	Cecum	TCGA-AA-A00R	ca22edd4-eb7c-4677-84aa-6f0354459a19	NO	Not Available	Not Available	Not Available	15	-23528	Not Applicable	0	30	Not Available																									Not Available
TCGA-DM-A285	179	Dead	T3	N2	M1	Stage IV				71	Ascending Colon	TCGA-DM-A285	99C532B0-6B42-4925-A344-FC7262C415EE	YES	Normal	Not Available	YES	27	-26021	179	0	Not Available	Not Available																									NOT HISPANIC OR LATINO
TCGA-G4-6315	1883	Alive	T3	N1	M1	Stage IV				66	Descending Colon	TCGA-G4-6315	ca5b878f-8bff-410a-8e6e-b1c133018c8d	NO	Not Available	1	YES	5	-24174	Not Applicable	0	937	Not Available		TCGA-G4-6315-D21985;TCGA-G4-6315-D21992;TCGA-G4-6315-D21990	9a8027b9-bdd9-4354-a3df-7c8b335184b3;fcc343e4-8a19-46af-93e6-fe2c4ef5ad4b;ac5b93fb-3aa7-4ff2-8699-5acfe146f59e	Not Available;Not Available;Not Available	27;27;27	180;180;138	40;40;40	Fluorouracil;Bevacizumab;Oxaliplatin	Not Available;Not Available;Not Available	1;1;1	10;11;8	672;298;143	mg;mg;mg	ADJUVANT;ADJUVANT;ADJUVANT	Not Applicable;Not Applicable;Not Applicable	1;1;1	IV;IV;IV	NO;NO;NO	Chemotherapy;Chemotherapy;Chemotherapy	Not Available;Not Available;Not Available	6742;3267;1136	mg;mg;mg	Not Available;Not Available;Not Available	2012;2012;2012	NOT HISPANIC OR LATINO
TCGA-AY-A8YK	573	Alive	T3	N2a	M1	Stage IVA				44	Sigmoid Colon	TCGA-AY-A8YK	C6F6C032-5D4E-4028-AED0-24A587620354	NO	Not Available	Not Available	NO	10	-16140	Not Applicable	0	209	Not Available		TCGA-AY-A8YK-D66229;TCGA-AY-A8YK-D66236;TCGA-AY-A8YK-D66237	809D0B32-3328-4D10-8884-A1A6FAAA9656;B61E9618-2291-43AD-97BE-8C4C0B8DF4FD;8E470806-DD81-425B-AAD4-C6CFF304F12C	Not Available;Not Available;Not Available	6;6;6	286;146;111	69;69;83	5FU;Oxaliplatin;Bevacizumab	Complete Response;Complete Response;Complete Response	10;10;10	Not Available;Not Available;Not Available	Not Available;Not Available;Not Available	Not Available;Not Available;Not Available	Not Available;Not Available;Not Available	Not Applicable;Not Applicable;Not Applicable	Not Available;Not Available;Not Available	Not Available;Not Available;Not Available	NO;NO;NO	Chemotherapy;Chemotherapy;Immunotherapy	Not Available;Not Available;Not Available	Not Available;Not Available;Not Available	Not Available;Not Available;Not Available	NO;NO;NO	2014;2014;2014	NOT HISPANIC OR LATINO
TCGA-AA-3526	580	Alive	T2	N0	M0	Stage I				57	Sigmoid Colon	TCGA-AA-3526	88e64f45-adc4-4223-9838-4d7d45b8f0c0	NO	Not Available	Not Available	Not Available	18	-21123	Not Applicable	0	30	Not Available																									Not Available
TCGA-NH-A50T	553	Alive	T3	N0	MX	Stage IIA				68	Splenic Flexure	TCGA-NH-A50T	490EABCA-4575-4BD6-9604-6B6E23D069CE	NO	Not Available	Not Available	NO	8	-25089	Not Applicable	0	125	Not Available																									NOT HISPANIC OR LATINO
TCGA-AA-A00E	913	Alive	T3	N0	M0	Stage IIA				65	Ascending Colon	TCGA-AA-A00E	124b6856-f581-46da-9068-b0a49b999785	NO	Not Available	Not Available	Not Available	15	-23741	Not Applicable	0	0	Not Available																									Not Available
TCGA-AA-3848	306	Dead	T3	N2	M0	Stage IIIC				82	Sigmoid Colon	TCGA-AA-3848	0a815133-0edd-4422-89f2-2f067b6f2156	NO	Not Available	Not Available	Not Available	18	-30194	Not Applicable	0	30	Not Available																									Not Available
TCGA-AA-3660	2375	Alive	T3	N0	M0	Stage II				51	Sigmoid Colon	TCGA-AA-3660	f9b5e6a5-c2da-4a0d-9251-bb6f557b7b58	NO	Not Available	Not Available	Not Available	18	-18932	Not Applicable	0	31	Not Available																									Not Available
TCGA-A6-3810	1111	Alive	T3	N0	M0	Stage IIA		FPPP	TCGA	62	Sigmoid Colon	TCGA-A6-3810	b728e6e8-a0e4-496b-904c-6f07c12e901f	NO	Not Available	Not Available	NO	19	-22999	Not Applicable	0	247	Not Available																									NOT HISPANIC OR LATINO
TCGA-AA-3555	911	Alive	T3	N0	M0	Stage IIA				81	Hepatic Flexure	TCGA-AA-3555	36eaf209-c332-4321-b6aa-51a3368ecd79	NO	Not Available	Not Available	Not Available	18	-29617	Not Applicable	0	30	Not Available																									Not Available
TCGA-AA-3979	730	Alive	T3	N0	M0	Stage IIA				84	Sigmoid Colon	TCGA-AA-3979	af17788e-a562-43aa-bd36-fd3e031f483c	NO	Not Available	Not Available	Not Available	18	-30742	Not Applicable	0	0	Not Available																									Not Available
TCGA-AA-3949	791	Alive	T3	N1	M0	Stage IIIB				87	Ascending Colon	TCGA-AA-3949	cbdabbcd-d8f1-4d7c-9e18-ebd83d888c51	NO	Not Available	Not Available	Not Available	18	-32081	Not Applicable	0	30	Not Available																									Not Available
TCGA-AA-A03J	1246	Alive	T2	N0	M0	Stage I				65	Sigmoid Colon	TCGA-AA-A03J	e6c8c5fc-158a-4de4-b3f6-3b645584bbc7	NO	Not Available	Not Available	Not Available	15	-23986	Not Applicable	0	0	Not Available																									Not Available
TCGA-CK-4951	1492	Alive	T3	N0	M0	Stage IIA				79	Ascending Colon	TCGA-CK-4951	2db3c23d-c591-4ea0-b0a8-ed9c4343c80e	NO	Not Available	72	NO	29	-28982	Not Applicable	0	1492	Not Available																									NOT HISPANIC OR LATINO
TCGA-AA-3980	242	Alive	T2	N0	M0	Stage I				89	Sigmoid Colon	TCGA-AA-3980	384400c1-98d6-4cc3-8724-de6711f6208b	NO	Not Available	Not Available	Not Available	18	-32630	Not Applicable	0	0	Not Available																									Not Available
TCGA-D5-6930	406	Alive	T3	N0	M0	Stage IIA				67	Ascending Colon	TCGA-D5-6930	286cbae3-8324-43b7-9b20-0f40dda1588e	NO	Not Available	40	YES	21	-24764	Not Applicable	0	46	Not Available																									NOT HISPANIC OR LATINO
TCGA-AA-3516	396	Dead	T3	N2	M0	Stage III				74	Ascending Colon	TCGA-AA-3516	d9d7f0d4-fa64-48f2-8037-52cbf0b34ad8	NO	Not Available	Not Available	Not Available	18	-27303	Not Applicable	0	0	Not Available																									Not Available
TCGA-AY-A54L	525	Alive	T2	N0	M0	Stage I				74	Transverse Colon	TCGA-AY-A54L	D8E9EA52-FF28-4626-BAA3-71350FD53DDF	Not Available	Not Available	Not Available	NO	26	-27074	Not Applicable	0	158	Not Available																									Not Evaluated
TCGA-AA-3680	335	Dead	T4	N2	M1	Stage IV				67	Cecum	TCGA-AA-3680	f3b9defb-88ed-4c95-9feb-7197d869676c	NO	Not Available	Not Available	Not Available	18	-24655	Not Applicable	0	0	Not Available		TCGA-AA-3680-D37466;TCGA-AA-3680-D37467;TCGA-AA-3680-D37468	CC56A6EE-BBEF-44F2-876A-0AB791B6F9B1;60CA88E0-83DA-4B36-BE1D-F18C24A1D8E7;AE2B4E60-C99E-48F0-8B68-5A121C279908	Not Available;Not Available;Not Available	3;3;3	90;90;90	31;31;31	Folinic acid;5-Fluorouracil;Oxaliplatin	Clinical Progressive Disease;Clinical Progressive Disease;Clinical Progressive Disease	12;12;12	Not Available;Not Available;Not Available	Not Available;Not Available;Not Available	Not Available;Not Available;Not Available	Not Available;Not Available;Not Available	Not Applicable;Not Applicable;Not Applicable	Not Available;Not Available;Not Available	Not Available;Not Available;Not Available	NO;NO;NO	Chemotherapy;Chemotherapy;Chemotherapy	Not Available;Not Available;Not Available	Not Available;Not Available;Not Available	Not Available;Not Available;Not Available	NO;NO;NO	2012;2012;2012	Not Available
TCGA-CM-6675	397	Alive	T3	N2b	M1b	Stage IVB				35	Cecum	TCGA-CM-6675	fce1fd5a-54d2-4260-b187-4eb7035e96e9	NO	Not Available	Not Available	NO	Not Available	-12935	Not Applicable	0	153	Not Available		TCGA-CM-6675-D17053;TCGA-CM-6675-D17055;TCGA-CM-6675-D17056;TCGA-CM-6675-D17058;TCGA-CM-6675-D30935;TCGA-CM-6675-D30939;TCGA-CM-6675-D30940;TCGA-CM-6675-D30942;TCGA-CM-6675-D30943;TCGA-CM-6675-D17052	95f85e67-bcf8-41f4-ab52-2987bb657f7f;7ca01e01-187e-4151-8bb8-ce64a784aa3b;561e1b28-4f4f-4a49-ac98-773ff5f37469;c2e7d5c5-7b1f-4a5c-9df4-a5a48969c93c;d1a17bb6-9a68-4c16-9360-01cd3518b8d4;e3a83403-6a75-451b-a0e6-0cbd8e0635a8;e24f390b-4610-43a6-8399-34d5373fb519;a3363539-73b2-432d-aaaa-e0638f2cc5df;63a50739-dc5b-40cd-90f2-b709c14dfde0;c2c0fc72-b0b4-41c1-83bf-df641b19a714	Not Available;Not Available;Not Available;Not Available;Not Available;Not Available;Not Available;Not Available;Not Available;Not Available	19;19;30;30;19;19;19;19;19;19	184;184;150;152;Not Available;Not Available;Not Available;Not Available;Not Available;178	24;24;24;54;337;337;337;366;337;24	Fluorouracil;Leucovorin Calcium;Oxaliplatin;Pegfilgrastim;Fluorouracil;IRINOtecan HCl;Leucovorin Calcium;Cetuximab;Floxuridine;Fluorouracil	Not Available;Not Available;Not Available;Not Available;Not Applicable;Not Applicable;Not Applicable;Not Applicable;Not Applicable;Not Available	4;4;9;9;4;4;4;4;4;4	12;12;10;7;Not Available;Not Available;Not Available;Not Available;Not Available;12	2800;900;190;6;Not Available;Not Available;Not Available;Not Available;Not Available;900	mg;mg;mg;mg;Not Available;Not Available;Not Available;Not Available;Not Available;mg	ADJUVANT;ADJUVANT;ADJUVANT;ADJUVANT;Not Available;Not Available;Not Available;Not Available;Not Available;ADJUVANT	Not Applicable;Not Applicable;Not Applicable;Not Applicable;Not Applicable;Not Applicable;Not Applicable;Not Applicable;Not Applicable;Not Applicable	1;1;1;1;Not Available;Not Available;Not Available;Not Available;Not Available;1	IV;IV;IV;SC;Not Available;Not Available;Not Available;Not Available;Not Available;IV	NO;NO;NO;NO;YES;YES;YES;YES;YES;NO	Chemotherapy;Other, specify in notes;Chemotherapy;Other, specify in notes;Chemotherapy;Chemotherapy;Chemotherapy;Chemotherapy;Chemotherapy;Chemotherapy	Not Available;Ancillary;Not Available;Ancillary;Not Available;Not Available;Not Available;Not Available;Not Available;Not Available	32600;9400;1780;42;Not Available;Not Available;Not Available;Not Available;Not Available;9400	mg;mg;mg;mg;Not Available;Not Available;Not Available;Not Available;Not Available;mg	Not Available;Not Available;Not Available;Not Available;NO;NO;NO;NO;NO;Not Available	2011;2011;2011;2011;2012;2012;2012;2012;2012;2012	NOT HISPANIC OR LATINO
TCGA-AA-3845	0	Dead	T3	N0	M0	Stage IIA				86	Ascending Colon	TCGA-AA-3845	bc02f801-081b-489b-87cb-d275c70299d5	NO	Not Available	Not Available	Not Available	18	-31593	0	0	Not Available	Not Available																									Not Available
TCGA-CA-6715	383	Alive	T3	N1	M0	Stage IIIB				63	Sigmoid Colon	TCGA-CA-6715	794131b8-f4be-4f15-b3b9-6f0b10a5a38b	Not Available	Not Available	Not Available	Not Available	8	-23075	Not Applicable	0	2	Not Available		TCGA-CA-6715-D70876;TCGA-CA-6715-D70878;TCGA-CA-6715-D70879	2A89E239-0062-4F9E-8946-8BD697383709;A3B59973-3FCE-44E7-99DE-11330368700D;56419CB6-A31A-4499-A503-8EBEDBCC1950	Not Available;Not Available;Not Available	10;10;10	227;227;227	44;44;44	oxaliplatin;5-Fluorouracil;Folinic Acid	Complete Response;Complete Response;Complete Response	3;3;3	Not Available;Not Available;Not Available	Not Available;Not Available;Not Available	Not Available;Not Available;Not Available	Not Available;Not Available;Not Available	Not Applicable;Not Applicable;Not Applicable	Not Available;Not Available;Not Available	Not Available;Not Available;Not Available	NO;NO;NO	Chemotherapy;Chemotherapy;Chemotherapy	Not Available;Not Available;Not Available	Not Available;Not Available;Not Available	Not Available;Not Available;Not Available	NO;NO;NO	2015;2015;2015	NOT HISPANIC OR LATINO
TCGA-AA-A01P	1158	Dead	T3	N1	M0	Stage III				80	Ascending Colon	TCGA-AA-A01P	13ae9d83-a22f-451f-88bb-686051725cf3	NO	Not Available	Not Available	Not Available	15	-29554	Not Applicable	0	0	Not Available																									Not Available
TCGA-AA-3869	822	Dead	T4	N2	M1	Stage IV				76	Cecum	TCGA-AA-3869	39d3b5b3-d51e-4d77-a8aa-2977fa734fab	NO	Not Available	Not Available	Not Available	18	-28062	Not Applicable	0	0	Not Available		TCGA-AA-3869-D37491;TCGA-AA-3869-D37492;TCGA-AA-3869-D37493;TCGA-AA-3869-D37494;TCGA-AA-3869-D37495;TCGA-AA-3869-D37496	DA64549C-BBD5-4E27-B064-182E142FC782;ECAD1937-2E65-4E73-959F-DF8DA17FBAD6;7BB5F82C-B67C-4405-840E-B5EB1385A49D;70A670E1-B68A-4FDE-804F-E54569FE7655;689C50C2-8AC3-4B58-BA25-84BE69AE99F1;634D660B-99EA-421D-A10D-A9B924C6AB3B	Not Available;Not Available;Not Available;Not Available;Not Available;Not Available	3;3;3;3;3;3	365;396;761;761;580;761	92;365;365;365;365;608	Capecitabine;Folinic acid;5-Fluorouracil;Irinotecan;Bevacizumab;Cetuximab	Partial Response;Partial Response;Partial Response;Partial Response;Partial Response;Partial Response	12;12;12;12;12;12	Not Available;Not Available;Not Available;Not Available;Not Available;Not Available	Not Available;Not Available;Not Available;Not Available;Not Available;Not Available	Not Available;Not Available;Not Available;Not Available;Not Available;Not Available	Not Available;Not Available;Not Available;Not Available;Not Available;Not Available	Not Applicable;Not Applicable;Not Applicable;Not Applicable;Not Applicable;Not Applicable	Not Available;Not Available;Not Available;Not Available;Not Available;Not Available	Not Available;Not Available;Not Available;Not Available;Not Available;Not Available	NO;NO;NO;NO;NO;NO	Chemotherapy;Chemotherapy;Chemotherapy;Chemotherapy;Targeted Molecular therapy;Targeted Molecular therapy	Not Available;Not Available;Not Available;Not Available;Not Available;Not Available	Not Available;Not Available;Not Available;Not Available;Not Available;Not Available	Not Available;Not Available;Not Available;Not Available;Not Available;Not Available	NO;NO;NO;NO;NO;NO	2012;2012;2012;2012;2012;2012	Not Available
TCGA-D5-5537	1381	Dead	T3	N2	MX					83	Ascending Colon	TCGA-D5-5537	ae6b315f-3f78-4695-adfa-48b0bbab2c89	NO	Not Available	Not Available	YES	28	-30505	Not Applicable	0	456	Not Available																									NOT HISPANIC OR LATINO
TCGA-AA-3831	547	Alive	T3	N0	M0	Stage IIA				66	Sigmoid Colon	TCGA-AA-3831	bce5579c-08c6-48e9-853e-fac85ba8cbea	NO	Not Available	Not Available	Not Available	18	-24411	Not Applicable	0	0	Not Available																									Not Available
TCGA-AZ-6605	159	Dead	T4	N1	M0	Stage IIIB				77	Ascending Colon	TCGA-AZ-6605	849031de-ac8a-4012-9362-d192512997f1	Not Available	Not Available	Not Available	Not Available	2	-28485	159	0	Not Available	Not Available		TCGA-AZ-6605-D34155	06300BAA-C980-4F05-B262-22DD1912B178	Not Available	31	105	56	FOLFOX	Stable Disease	7	Not Available	Not Available	Not Available	Not Available	Not Applicable	Not Available	Not Available	NO	Chemotherapy	Not Available	Not Available	Not Available	NO	2012	NOT HISPANIC OR LATINO
TCGA-AA-A00W	456	Alive	T1	N0	M0	Stage I				80	Sigmoid Colon	TCGA-AA-A00W	fa96d094-0165-401c-8fd5-6d1ee4ef3994	NO	Not Available	Not Available	Not Available	15	-29311	Not Applicable	0	30	Not Available																									Not Available
TCGA-A6-6782	617	Alive	T4a	N0	MX	Stage IIB				82	Discrepancy	TCGA-A6-6782	3eb37b12-b8b4-40a3-bd8b-f89fc39c05fa	NO	Not Available	Not Available	NO	6	-30012	Not Applicable	0	164	Not Available																									NOT HISPANIC OR LATINO
TCGA-AA-3527	0	Alive	T3	N0	M0	Stage IIA				90	Cecum	TCGA-AA-3527	269e8ca8-722d-449b-ace1-6545bd72bdd6	NO	Not Available	Not Available	Not Available	18	-32871	Not Applicable	0	0	Not Available																									Not Available
TCGA-AA-A01X	791	Alive	T2	N1	M0	Stage III				80	Sigmoid Colon	TCGA-AA-A01X	2e386e48-b99b-4806-a3e3-081d72a606e7	NO	Not Available	Not Available	Not Available	15	-29281	Not Applicable	0	30	Not Available																									Not Available
TCGA-4N-A93T	146	Alive	T4a	N1b	M0	Stage IIIB				67	Ascending Colon	TCGA-4N-A93T	92554413-9EBC-4354-8E1B-9682F3A031D9	NO	Not Available	30	YES	1	-24523	Not Applicable	0	8	Not Available		TCGA-4N-A93T-D65957	25E5CD87-BB8D-4D2A-8219-1660D2F13AEE	Not Available	1	Not Available	68	Xeloda	Not Applicable	10	Not Available	Not Available	Not Available	Not Available	Not Applicable	Not Available	Not Available	YES	Chemotherapy	Not Available	Not Available	Not Available	NO	2014	NOT HISPANIC OR LATINO
TCGA-NH-A8F8	511	Dead	T4a	N2b	M1	Stage IV				79	Ascending Colon	TCGA-NH-A8F8	1E0789D6-7EFB-4807-8D36-CD9224675A0C	NO	Not Available	80	NO	15	-29185	Not Applicable	0	167	Not Available		TCGA-NH-A8F8-D58585;TCGA-NH-A8F8-D58586;TCGA-NH-A8F8-D58588;TCGA-NH-A8F8-D67094;TCGA-NH-A8F8-D67096	49ED1A3E-5F7C-4833-B8EC-4A3E03CE86FB;7642A17D-2740-4D28-A1B8-38B3CD34BF8E;913BD500-F875-4D0F-A2E7-65FF6CC7FFE6;D595C873-FA75-4453-89C2-319731CC8214;3B1F2085-8877-45C8-9B40-3405840006A1	Not Available;Not Available;Not Available;Not Available;Not Available	15;15;15;30;30	476;181;469;Not Available;Not Available	49;49;76;292;323	fluorouracil;oxaliplatin;bevacizumab;bevacizumab;capecitabine	Clinical Progressive Disease;Unknown;Unknown;Not Applicable;Not Applicable	4;4;4;10;10	Not Available;Not Available;Not Available;Not Available;Not Available	Not Available;Not Available;Not Available;Not Available;Not Available	Not Available;Not Available;Not Available;Not Available;Not Available	Not Available;Not Available;Not Available;Not Available;Not Available	Not Applicable;Not Applicable;Not Applicable;Not Applicable;Not Applicable	Not Available;Not Available;Not Available;Not Available;Not Available	Not Available;Not Available;Not Available;Not Available;Not Available	NO;NO;NO;YES;YES	Chemotherapy;Chemotherapy;Immunotherapy;Immunotherapy;Chemotherapy	Not Available;Not Available;Not Available;Not Available;Not Available	Not Available;Not Available;Not Available;Not Available;Not Available	Not Available;Not Available;Not Available;Not Available;Not Available	NO;NO;NO;NO;NO	2014;2014;2014;2014;2014	NOT HISPANIC OR LATINO
TCGA-AA-3531	1035	Alive	T3	N0	M0	Stage IIA				75	Sigmoid Colon	TCGA-AA-3531	401a37f3-6630-4400-a811-a262351e37de	NO	Not Available	Not Available	Not Available	18	-27514	Not Applicable	0	0	Not Available																									Not Available
TCGA-D5-6538	521	Alive	T3	N2	M0	Stage IIIB				79	Hepatic Flexure	TCGA-D5-6538	a117ace8-ac5a-48d8-8aee-3024d6f0f873	Not Available	Not Available	Not Available	NO	13	-29194	Not Applicable	0	246	Not Available		TCGA-D5-6538-D28625	fe993031-2966-48c0-af72-b6e31f2652ec	Not Available	27	Not Available	23	XELODA	Not Available	2	Not Available	500mg	mg	ADJUVANT	Not Applicable	Not Available	PO	YES	Chemotherapy	Not Available	Not Available	Not Available	Not Available	2012	NOT HISPANIC OR LATINO
TCGA-A6-A567	1881	Dead	T3	N1	M1	Stage IV				56	Sigmoid Colon	TCGA-A6-A567	857A5889-19E7-4208-8362-F1377C408037	Unknown	Not Available	Not Available	YES	18	-20493	1881	0	Not Available	Not Available																									Not Evaluated
TCGA-AA-3534	882	Alive	T3	N0	M0	Stage IIA				78	Ascending Colon	TCGA-AA-3534	df228c56-89ac-4122-93b3-6c0740c4ec09	NO	Not Available	Not Available	Not Available	18	-28489	Not Applicable	0	0	Not Available																									Not Available
TCGA-AD-6963	834	Alive	T3	N0	MX					58	Ascending Colon	TCGA-AD-6963	47a8e514-904c-4867-8f43-7eb573be835b	NO	Not Available	48	Not Available	17	-21294	Not Applicable	0	3	Not Available																									Not Available
TCGA-AA-3833	485	Alive	T3	N0	M0	Stage IIA				63	Ascending Colon	TCGA-AA-3833	1a09207e-9184-4f32-bd07-a9f4dc6c825d	NO	Not Available	Not Available	Not Available	18	-23011	Not Applicable	0	0	Not Available																									Not Available
TCGA-AA-3814	0	Alive	T3	N0	M0	Stage IIA				85	Ascending Colon	TCGA-AA-3814	f38d49b7-6cad-4460-abd0-3685a3b2d941	NO	Not Available	Not Available	Not Available	18	-31380	Not Applicable	0	0	Not Available																									Not Available
TCGA-AA-3854	1096	Alive	T2	N0	M0	Stage I				71	Sigmoid Colon	TCGA-AA-3854	7a6c54f1-f4e4-426b-b306-2ca3c4de12ca	NO	Not Available	Not Available	Not Available	18	-26022	Not Applicable	0	31	Not Available																									Not Available
TCGA-A6-6141	255	Alive	T3	N0	M0	Stage IIA				31	Cecum	TCGA-A6-6141	58facedb-fcb8-4ecf-8338-2bfa4947acef	NO	Not Available	Not Available	Not Available	17	-11391	Not Applicable	0	130	Not Available		TCGA-A6-6141-D21504;TCGA-A6-6141-D21501;TCGA-A6-6141-D21502;TCGA-A6-6141-D21503	268e1286-26c0-4536-9f42-c7f5ea328d67;f3ddb88f-1ac9-4fe8-99c0-9c299af34ae0;7fd0f190-15dc-4f21-bd5a-4b7a10378e8a;9b6fffa2-0197-4e5d-83b7-6799693aecb7	Not Available;Not Available;Not Available;Not Available	14;14;14;14	216;214;214;214	60;60;60;60	5FU;Oxaliplatin;Leucovorin;5FU	Not Available;Not Available;Not Available;Not Available	2;2;2;2	12;12;12;12	5150;180;550;850	mg;mg;mg;mg	ADJUVANT;ADJUVANT;ADJUVANT;ADJUVANT	Not Applicable;Not Applicable;Not Applicable;Not Applicable	1;1;1;1	IV;IV;IV;IV	NO;NO;NO;NO	Chemotherapy;Chemotherapy;Other, specify in notes;Chemotherapy	Not Available;Not Available;Ancillary;Not Available	61800;2160;4900;10200	mg;mg;mg;mg	Not Available;Not Available;Not Available;Not Available	2012;2012;2012;2012	NOT HISPANIC OR LATINO
TCGA-AA-3688	578	Alive	T3	N1	M1	Stage IV				80	Sigmoid Colon	TCGA-AA-3688	2c9996bb-af6e-4424-881a-e81b9c9aeb78	NO	Not Available	Not Available	Not Available	18	-29220	Not Applicable	0	0	Not Available																									Not Available
TCGA-AA-A02E	90	Dead	T3	N1	M1	Stage IV				82	Cecum	TCGA-AA-A02E	35620be9-3ba5-4be7-9e00-83103e6a92e6	NO	Not Available	Not Available	Not Available	15	-30256	90	0	Not Available	Not Available																									Not Available
TCGA-DM-A1DA	228	Dead	T3	N2	M0	Stage IIIC				71	Cecum	TCGA-DM-A1DA	f4a804d3-b5c4-4da5-800f-6e5757ecfa1c	YES	Normal	Not Available	Not Available	Not Available	-26169	228	0	228	228																									NOT HISPANIC OR LATINO
TCGA-AA-3554	546	Alive	T3	N0	M0	Stage IIA				62	Ascending Colon	TCGA-AA-3554	ba49b428-246d-46d2-b549-39a5fc8f7003	NO	Not Available	Not Available	Not Available	18	-22799	Not Applicable	0	0	Not Available																									Not Available
TCGA-AA-3681	182	Alive	T3	N1	M0	Stage III				77	Cecum	TCGA-AA-3681	abb0d53f-f74e-45dc-8fbb-40863016f3c6	NO	Not Available	Not Available	Not Available	18	-28399	Not Applicable	0	0	Not Available																									Not Available
TCGA-WS-AB45	2130	Alive	T3	N0	MX	Stage IIA				52	Cecum	TCGA-WS-AB45	7F6898E2-A840-4AD1-80F7-783F8B766FCC	Not Available	Not Available	0.05	NO	16	Not Available	Not Applicable	0	2038	Not Available																									NOT HISPANIC OR LATINO
TCGA-D5-6535	460	Alive	T3	N1	MX	Stage IIIB				80	Ascending Colon	TCGA-D5-6535	a123dc45-e427-461e-8d60-c51307aa498c	NO	Not Available	1	YES	9	-29278	Not Applicable	0	10	Not Available																									NOT HISPANIC OR LATINO
TCGA-CM-6679	306	Alive	T3	N0	M0	Stage IIA				58	Sigmoid Colon	TCGA-CM-6679	76e96b5a-b565-42c7-a651-34d5132e6dde	NO	Not Available	40	NO	Not Available	-21519	Not Applicable	0	122	Not Available																									NOT HISPANIC OR LATINO
TCGA-D5-6932	346	Alive	T3	N0	M0	Stage IIA				69	Transverse Colon	TCGA-D5-6932	131e0571-de86-415f-b3fb-dc9f971258d3	NO	Not Available	Not Available	YES	21	-25466	Not Applicable	0	19	Not Available																									NOT HISPANIC OR LATINO
TCGA-AA-3712	0	Alive	T3	N2	M0	Stage III				65	Descending Colon	TCGA-AA-3712	2b94070a-21ec-457b-88af-3d2a89b97ac6	NO	Not Available	Not Available	Not Available	18	-23831	Not Applicable	0	0	Not Available																									Not Available
TCGA-AA-3664	1643	Alive	T3	N0	M0	Stage II				74	Cecum	TCGA-AA-3664	a06c09a8-0951-49f4-a765-5147bbcae109	NO	Not Available	Not Available	Not Available	18	-27363	Not Applicable	0	0	Not Available																									Not Available
TCGA-AA-3511	212	Alive	T4	N0	M0	Stage II				64	Sigmoid Colon	TCGA-AA-3511	93edb105-5dc9-4a4a-9fca-c91f0161fcc7	NO	Not Available	Not Available	Not Available	18	-23407	Not Applicable	0	0	Not Available																									Not Available
TCGA-AZ-4616	156	Dead	T3	N2	M1	Stage IV				82	Cecum	TCGA-AZ-4616	e703af88-c05f-4d7b-b225-d640e4d1a2a5	Not Available	Not Available	Not Available	Not Available	30	-30043	156	0	Not Available	Not Available		TCGA-AZ-4616-D31069	ee6f05bf-df9b-4ced-8826-a19eafb73cc6	Not Available	23	Not Available	113	XELODA	Stable Disease	4	Not Available	Not Available	Not Available	Not Available	Not Applicable	Not Available	Not Available	NO	Chemotherapy	Not Available	Not Available	Not Available	NO	2012	NOT HISPANIC OR LATINO
TCGA-A6-2671	1331	Dead	T3	N2	M1	Stage IV				85	Sigmoid Colon	TCGA-A6-2671	565e2726-4942-4726-89d3-c5e3797f7204	NO	Not Available	Not Available	NO	28	-31329	Not Applicable	0	648	Not Available		TCGA-A6-2671-D6020;TCGA-A6-2671-D6055;TCGA-A6-2671-D6059;TCGA-A6-2671-D6049;TCGA-A6-2671-D6091;TCGA-A6-2671-D6025;TCGA-A6-2671-D6046;TCGA-A6-2671-D6092;TCGA-A6-2671-D6051;TCGA-A6-2671-D6056;TCGA-A6-2671-D12772;TCGA-A6-2671-D12770;TCGA-A6-2671-D12768;TCGA-A6-2671-D12771;TCGA-A6-2671-D12773;TCGA-A6-2671-D31097;TCGA-A6-2671-D31177;TCGA-A6-2671-D31178;TCGA-A6-2671-D31179;TCGA-A6-2671-D31180;TCGA-A6-2…	3aefce87-3734-4b5f-a4e2-c62dbba5badf;409b319f-5642-4f38-8e5d-d948107d0425;dc9ad6a9-f324-4d56-93ae-dad6cd659a43;891f0411-bdcc-468d-bc50-acc539d6bc11;75929a1b-da0b-4859-9592-e0b096b3e46c;b7b6c0f7-bf3f-45c3-b847-79b03842ba16;c8f771fa-6176-48de-8426-1f572f7866d8;fdda207f-5b42-4d35-87bc-c3156b31312d;25d52ff6-0b91-435d-8fc0-dcdc5519fa81;4c5e40d8-6a8a-4638-8b23-2461b1dcdd79;6d5ce679-235e-463c-85a8-d6812…	Not Available;Not Available;Not Available;Not Available;Not Available;Not Available;Not Available;Not Available;Not Available;Not Available;Not Available;Not Available;Not Available;Not Available;Not Available;Not Available;Not Available;Not Available;Not Available;Not Available;Not Available;Not Available	11;12;12;12;12;12;12;12;12;12;7;7;7;7;7;24;24;24;24;24;24;24	270;270;Not Available;270;Not Available;270;186;Not Available;272;Not Available;754;754;711;756;739;984;844;844;846;984;1105;1091	96;96;551;96;551;96;96;551;96;551;725;551;551;551;551;844;844;844;844;844;1041;1041	Study drug AMG 655;5 FU;Irinotecan;Leucovorin;5 FU;Avastin;Oxaliplatin;5 FU;5 FU;Avastin;Leucovorin;5 FU;Irinotecan;5FU;Avastin;Irinotecan;5-FU;Leucovorin;5-FU;Avastin;Irinotecan;Erbitux	Not Available;Not Available;Not Available;Not Available;Not Available;Not Available;Not Available;Not Available;Not Available;Not Available;Not Available;Not Available;Not Available;Not Available;Not Available;Clinical Progressive Disease;Clinical Progressive Disease;Clinical Progressive Disease;Clinical Progressive Disease;Clinical Progressive Disease;Clinical Progressive Disease;Clinical Progre…	1;1;1;1;1;1;1;1;1;1;6;6;6;6;6;4;4;4;4;4;4;4	12;12;7;12;7;12;7;7;12;7;3;13;9;13;12;Not Available;Not Available;Not Available;Not Available;Not Available;Not Available;Not Available	Not Available;450-735;320-325;700-735;725;300-320;115-155;4300-4325;2650-4400;300-325;500;725;300-320;4300-4325;300-325;Not Available;Not Available;Not Available;Not Available;Not Available;Not Available;Not Available	mg/kg;mg;mg;mg;mg;mg;mg;mg;mg;mg;mg;mg;mg;mg;mg;Not Available;Not Available;Not Available;Not Available;Not Available;Not Available;Not Available	PALLIATIVE;PALLIATIVE;PROGRESSION;PALLIATIVE;PROGRESSION;PALLIATIVE;PALLIATIVE;PROGRESSION;PALLIATIVE;PROGRESSION;PROGRESSION;PROGRESSION;PROGRESSION;PROGRESSION;PROGRESSION;Not Available;Not Available;Not Available;Not Available;Not Available;Not Available;Not Available	Not Applicable;Not Applicable;Not Applicable;Not Applicable;Not Applicable;Not Applicable;Not Applicable;Not Applicable;Not Applicable;Not Applicable;Not Applicable;Not Applicable;Not Applicable;Not Applicable;Not Applicable;Not Applicable;Not Applicable;Not Applicable;Not Applicable;Not Applicable;Not Applicable;Not Applicable	1;1;1;1;2;1;1;2;1;2;2;2;2;2;2;Not Available;Not Available;Not Available;Not Available;Not Available;Not Available;Not Available	IV;IV;IV;IV;IV;IV;IV;IV;IV;IV;Intravesical;IV;IV;IV;IV;Not Available;Not Available;Not Available;Not Available;Not Available;Not Available;Not Available	NO;NO;YES;NO;YES;NO;NO;YES;NO;YES;NO;NO;NO;NO;NO;NO;NO;NO;NO;NO;NO;NO	Other, specify in notes;Chemotherapy;Chemotherapy;Other, specify in notes;Chemotherapy;Targeted Molecular therapy;Chemotherapy;Chemotherapy;Chemotherapy;Targeted Molecular therapy;Other, specify in notes;Chemotherapy;Chemotherapy;Chemotherapy;Targeted Molecular therapy;Chemotherapy;Chemotherapy;Ancillary;Chemotherapy;Targeted Molecular therapy;Chemotherapy;Targeted Molecular therapy	Protocol AMG 20060464;Not Available;Not Available;Ancillary;Not Available;Not Available;Not Available;Not Available;Not Available;Not Available;Ancillary;Not Available;Not Available;Not Available;Not Available;Not Available;Not Available;Not Available;Not Available;Not Available;Not Available;Not Available	Not Available;7185;2250;8435;5075;3620;985;30200;42950;2200;1500;9425;2890;56000;3775;Not Available;Not Available;Not Available;Not Available;Not Available;Not Available;Not Available	mg/kg;mg;mg;mg;mg;mg;mg;mg;mg;mg;mg;mg;mg;mg;mg;Not Available;Not Available;Not Available;Not Available;Not Available;Not Available;Not Available	Not Available;Not Available;Not Available;Not Available;Not Available;Not Available;Not Available;Not Available;Not Available;Not Available;Not Available;Not Available;Not Available;Not Available;Not Available;NO;NO;NO;NO;NO;NO;NO	2011;2011;2011;2011;2011;2011;2011;2011;2011;2011;2011;2011;2011;2011;2011;2012;2012;2012;2012;2012;2012;2012	NOT HISPANIC OR LATINO
TCGA-AA-A02F	1216	Alive	T3	N1	M1	Stage IV				68	Sigmoid Colon	TCGA-AA-A02F	dd4be58e-da22-4bcd-bf4c-2b9e60ffda19	NO	Not Available	Not Available	Not Available	15	-25051	Not Applicable	0	31	Not Available		TCGA-AA-A02F-D37387;TCGA-AA-A02F-D37388;TCGA-AA-A02F-D37389;TCGA-AA-A02F-D37390;TCGA-AA-A02F-D37391	F6A5DA6A-5BF9-4460-ACFE-CBA48519AAB4;71DCC297-9D24-453F-A455-1F3541C60CE2;FD42DB4E-C958-48D6-BE29-86FBF6F1B815;FFAE6F6B-0040-4DAB-8FD5-F053839270BC;9C785800-15D7-46C2-95F4-282E60286F9C	Not Available;Not Available;Not Available;Not Available;Not Available	3;3;3;3;3	1127;1127;1127;700;1096	59;59;59;670;59	Folinic acid;5-Fluorouracil;Irinotecan;Oxaliplatin;Bevacizumab	Partial Response;Partial Response;Partial Response;Partial Response;Partial Response	12;12;12;12;12	Not Available;Not Available;Not Available;Not Available;Not Available	Not Available;Not Available;Not Available;Not Available;Not Available	Not Available;Not Available;Not Available;Not Available;Not Available	Not Available;Not Available;Not Available;Not Available;Not Available	Not Applicable;Not Applicable;Not Applicable;Not Applicable;Not Applicable	Not Available;Not Available;Not Available;Not Available;Not Available	Not Available;Not Available;Not Available;Not Available;Not Available	NO;NO;NO;NO;NO	Chemotherapy;Chemotherapy;Chemotherapy;Chemotherapy;Targeted Molecular therapy	Not Available;Not Available;Not Available;Not Available;Not Available	Not Available;Not Available;Not Available;Not Available;Not Available	Not Available;Not Available;Not Available;Not Available;Not Available	NO;NO;NO;NO;NO	2012;2012;2012;2012;2012	Not Available
TCGA-D5-6534	1316	Alive	T3	N0	M0	Stage IIA				62	Ascending Colon	TCGA-D5-6534	d259eeb2-d15e-436d-9d37-2d0b7658bc91	NO	Not Available	Not Available	YES	9	-22778	Not Applicable	0	241	Not Available																									NOT HISPANIC OR LATINO
TCGA-AM-5821	28	Alive	T3	N0	M0	Stage IIA				68	Sigmoid Colon	TCGA-AM-5821	605baa86-79e3-484d-82d2-4de27d405ba1	NO	Not Available	Not Available	Not Available	15	-24903	Not Applicable	0	28	Not Available																									NOT HISPANIC OR LATINO
TCGA-A6-3808	1014	Alive	T3	N0	M0	Stage IIA				73	Cecum	TCGA-A6-3808	4f9775f2-b663-4daf-aa9e-50915cae9407	NO	Not Available	Not Available	NO	11	-26666	Not Applicable	0	279	Not Available																									NOT HISPANIC OR LATINO
TCGA-AA-3517	1186	Alive	T3	N0	M0	Stage IIA				60	Splenic Flexure	TCGA-AA-3517	c4d74653-d26b-4e51-aee0-82ee3d42f883	NO	Not Available	Not Available	Not Available	18	-22099	Not Applicable	0	0	Not Available		TCGA-AA-3517-D37446;TCGA-AA-3517-D37447;TCGA-AA-3517-D37448;TCGA-AA-3517-D37449;TCGA-AA-3517-D37450	4B85C082-B80A-4078-9ACE-04A97F890D2C;F87AD537-F5FE-44DB-8AF5-E6409F211742;F1363524-2B4B-4BEF-AA3A-4C1332C21770;21ACA8B4-7BE6-4C0B-910C-F3B95A355C06;0DADF926-9A5E-4BB7-A9EF-9122111FAC39	Not Available;Not Available;Not Available;Not Available;Not Available	3;3;3;3;3	1065;1155;1127;1065;1127	821;821;821;1004;821	Folinic acid;5-Fluorouracil;Irinotecan;Oxaliplatin;Bevacizumab	Complete Response;Complete Response;Complete Response;Complete Response;Complete Response	12;12;12;12;12	Not Available;Not Available;Not Available;Not Available;Not Available	Not Available;Not Available;Not Available;Not Available;Not Available	Not Available;Not Available;Not Available;Not Available;Not Available	Not Available;Not Available;Not Available;Not Available;Not Available	Not Applicable;Not Applicable;Not Applicable;Not Applicable;Not Applicable	Not Available;Not Available;Not Available;Not Available;Not Available	Not Available;Not Available;Not Available;Not Available;Not Available	NO;NO;NO;NO;NO	Chemotherapy;Chemotherapy;Chemotherapy;Chemotherapy;Targeted Molecular therapy	Not Available;Not Available;Not Available;Not Available;Not Available	Not Available;Not Available;Not Available;Not Available;Not Available	Not Available;Not Available;Not Available;Not Available;Not Available	NO;NO;NO;NO;NO	2012;2012;2012;2012;2012	Not Available
TCGA-A6-2672	1419	Alive	T3	N1	M0	Stage IIIB				82	Discrepancy	TCGA-A6-2672	b612d491-7442-4119-a53c-5ebcc35c31f4	NO	Not Available	Not Available	NO	4	-30237	Not Applicable	0	503	Not Available																									NOT HISPANIC OR LATINO
TCGA-F4-6569	1087	Alive	T2	N0	M0	Stage I				60	Transverse Colon	TCGA-F4-6569	d3062aac-4c42-41b4-a9f3-90aa72e6fb1e	NO	Not Available	Not Available	Not Available	20	-22203	Not Applicable	0	0	Not Available		TCGA-F4-6569-D63479;TCGA-F4-6569-D63480	07B6950E-FF2F-4B33-BFF0-9CB598F7EFE2;6AC4AB3C-AA5A-4D66-B031-2ED464C10E17	Not Available;Not Available	11;11	201;201	23;23	Leucovorin;5-Fluorouracil	Complete Response;Complete Response	8;8	Not Available;Not Available	Not Available;Not Available	Not Available;Not Available	Not Available;Not Available	Not Applicable;Not Applicable	Not Available;Not Available	Not Available;Not Available	NO;NO	Ancillary;Chemotherapy	Not Available;Not Available	Not Available;Not Available	Not Available;Not Available	NO;NO	2014;2014	NOT HISPANIC OR LATINO
TCGA-RU-A8FL	1177	Alive	T3	N2a	MX	Stage IIIB				51	Cecum	TCGA-RU-A8FL	5F6ED48B-3B5A-4D20-8FBF-C9AA3FEEA186	NO	Not Available	65	NO	24	-18975	Not Applicable	0	921	Not Available		TCGA-RU-A8FL-D68261;TCGA-RU-A8FL-D68258;TCGA-RU-A8FL-D68257;TCGA-RU-A8FL-D68088	C47FCF93-73B8-400B-B465-F031923491F1;35B51064-B60A-468F-A98F-BAC6F14F516D;09D26C80-A0A1-453B-901C-347775472D0F;6F9A2902-54C7-401D-BEEB-5A1F444AFCCE	Not Available;Not Available;Not Available;Not Available	14;14;14;14	756;677;334;210	679;343;270;48	C1 FOLFIRI/Zaltrap;Irinotecan + Cetuximab;FOLFIRI/Avastin;FOLFOX	Clinical Progressive Disease;Clinical Progressive Disease;Clinical Progressive Disease;Clinical Progressive Disease	11;11;11;11	Not Available;Not Available;Not Available;Not Available	Not Available;Not Available;Not Available;Not Available	Not Available;Not Available;Not Available;Not Available	Not Available;Not Available;Not Available;Not Available	Not Applicable;Not Applicable;Not Applicable;Not Applicable	Not Available;Not Available;Not Available;Not Available	Not Available;Not Available;Not Available;Not Available	NO;NO;NO;NO	Chemotherapy;Chemotherapy;Chemotherapy;Chemotherapy	Not Available;Not Available;Not Available;Not Available	Not Available;Not Available;Not Available;Not Available	Not Available;Not Available;Not Available;Not Available	NO;NO;NO;NO	2014;2014;2014;2014	NOT HISPANIC OR LATINO
TCGA-AA-3872	0	Alive	T4	N2	M1	Stage IV				45	Sigmoid Colon	TCGA-AA-3872	20ccd267-74e5-4574-a8e1-028bcd74aaeb	NO	Not Available	Not Available	Not Available	18	-16651	Not Applicable	0	0	Not Available																									Not Available
TCGA-CA-5796	377	Alive	T3	N0	M0	Stage IIA				52	Ascending Colon	TCGA-CA-5796	65ab030d-39f2-48ab-80ac-90cb1faa823a	Not Available	Not Available	Not Available	Not Available	2	-19353	Not Applicable	0	12	Not Available		TCGA-CA-5796-D70884;TCGA-CA-5796-D70885;TCGA-CA-5796-D70887	92A15186-B406-49DF-A981-9E54C965CEB6;1B08A697-B28B-4C55-A3F5-C60EDC93DF2E;5D7CAFE8-C18A-445B-9AB4-094EB5D34245	Not Available;Not Available;Not Available	10;10;10	183;183;183	30;30;30	oxaliplatin;5-Fluorouracil;Folinic Acid	Complete Response;Complete Response;Complete Response	3;3;3	Not Available;Not Available;Not Available	Not Available;Not Available;Not Available	Not Available;Not Available;Not Available	Not Available;Not Available;Not Available	Not Applicable;Not Applicable;Not Applicable	Not Available;Not Available;Not Available	Not Available;Not Available;Not Available	NO;NO;NO	Chemotherapy;Chemotherapy;Chemotherapy	Not Available;Not Available;Not Available	Not Available;Not Available;Not Available	Not Available;Not Available;Not Available	NO;NO;NO	2015;2015;2015	NOT HISPANIC OR LATINO
TCGA-A6-6140	734	Alive	T3	N0	M0	Stage IIA				62	Descending Colon	TCGA-A6-6140	21ddbfaa-1b21-4a2b-be2c-237dd69b20ff	NO	Not Available	Not Available	NO	14	-22835	Not Applicable	0	125	Not Available		TCGA-A6-6140-D20354;TCGA-A6-6140-D20356;TCGA-A6-6140-D20355	ba8de936-a9ae-4858-ba46-6e682ed17c82;25c8886e-fa04-4b3a-ab0a-ed022afa6405;555b9c92-b76f-4e07-8f57-cde03e8e773d	Not Available;Not Available;Not Available	9;9;9	181;188;188	34;34;34	Oxaliplatin;Leucovorin;Fluorouracil	Not Available;Not Available;Not Available	1;1;1	3;3;3	83-163;50-175;720-960	mg;mg;mg	ADJUVANT;ADJUVANT;ADJUVANT	Not Applicable;Not Applicable;Not Applicable	1;1;1	IV;IV;IV	NO;NO;NO	Chemotherapy;Other, specify in notes;Chemotherapy	Not Available;Ancillary;Not Available	985;1525;13801	mg;mg;mg	Not Available;Not Available;Not Available	2012;2012;2012	NOT HISPANIC OR LATINO
TCGA-SS-A7HO	1829	Alive	T4a	N0	M0	Stage IIB				44	Cecum	TCGA-SS-A7HO	8D0FA506-3F51-4108-8427-7DABF270BCD4	NO	Not Available	1	NO	31	-16416	Not Applicable	0	1829	Not Available		TCGA-SS-A7HO-D71978;TCGA-SS-A7HO-D71979;TCGA-SS-A7HO-D71980	55A13292-9E26-4AFA-8FCF-9772EE2C47E2;6E855AC1-15F0-41DD-995C-21AA794684C2;056AC44F-3B85-41FF-9157-7475F0735646	Not Available;Not Available;Not Available	31;31;31	93;93;93	37;37;37	Oxaliplatin;5-FU;Leucovorin	Complete Response;Complete Response;Complete Response	3;3;3	Not Available;Not Available;Not Available	Not Available;Not Available;Not Available	Not Available;Not Available;Not Available	Not Available;Not Available;Not Available	Not Applicable;Not Applicable;Not Applicable	Not Available;Not Available;Not Available	Not Available;Not Available;Not Available	NO;NO;NO	Chemotherapy;Chemotherapy;Ancillary	Not Available;Not Available;Not Available	Not Available;Not Available;Not Available	Not Available;Not Available;Not Available	NO;NO;NO	2015;2015;2015	NOT HISPANIC OR LATINO
TCGA-AZ-6599	206	Dead	T2	N0	MX	Stage I				72	Cecum	TCGA-AZ-6599	fbb69964-f962-4b89-b59b-dd05f8faf61a	Not Available	Not Available	Not Available	Not Available	29	-26438	206	0	Not Available	Not Available																									NOT HISPANIC OR LATINO
TCGA-AA-A01Q	31	Alive	T3	N0	M0	Stage II				48	Ascending Colon	TCGA-AA-A01Q	4be66108-e72a-406b-bb4b-f58ff2877336	NO	Not Available	Not Available	Not Available	15	-17715	Not Applicable	0	31	Not Available																									Not Available
TCGA-AA-3855	975	Alive	T2	N0	M0	Stage I				72	Sigmoid Colon	TCGA-AA-3855	b4c3cf95-a27c-4bcf-9321-38723473e83b	NO	Not Available	Not Available	Not Available	18	-26541	Not Applicable	0	0	Not Available																									Not Available
TCGA-AY-A71X	588	Alive	T2	N0	M0	Stage I				54	Cecum	TCGA-AY-A71X	D4DA3298-3A02-44A6-BDCD-D260F38E520B	NO	Not Available	Not Available	YES	9	-19904	Not Applicable	0	235	Not Available																									NOT HISPANIC OR LATINO
TCGA-AA-3713	579	Alive	T3	N0	M1	Stage IV				68	Ascending Colon	TCGA-AA-3713	57a2044d-20cc-4d02-b268-ce570a0fabe3	Not Available	Not Available	Not Available	Not Available	18	-24927	Not Applicable	0	30	Not Available		TCGA-AA-3713-D37500	9597EA4B-6886-4161-8F9B-825AF0C1FD21	Not Available	3	456	244	5-Fluorouracil	Partial Response	12	Not Available	Not Available	Not Available	Not Available	Not Applicable	Not Available	Not Available	NO	Chemotherapy	Not Available	Not Available	Not Available	NO	2012	Not Available
TCGA-AA-3538	791	Alive	T2	N0	M0	Stage I				54	Descending Colon	TCGA-AA-3538	c594196e-49ef-4195-a6b6-4ef4a1d9ec15	NO	Not Available	Not Available	Not Available	18	-19752	Not Applicable	0	0	Not Available																									Not Available
TCGA-G4-6293	4051	Alive	T3	N1	M0	Stage III				49	Transverse Colon	TCGA-G4-6293	27d9c162-11bb-48fb-a41a-aa05fcb4c1c2	NO	Not Available	Not Available	YES	27	-18076	Not Applicable	0	3203	Not Available		TCGA-G4-6293-D21800	b280e2a2-cbfb-45dd-9277-bb4a0c42f558	Not Available	19	235	25	Fluorouracil	Not Available	1	4	500	mg/m2	ADJUVANT	Not Applicable	1	IV	NO	Chemotherapy	Not Available	2000	mg/m2	Not Available	2012	NOT HISPANIC OR LATINO
TCGA-AA-A00L	1157	Alive	T3	N0	M0	Stage IIA				66	Transverse Colon	TCGA-AA-A00L	381cf7f3-cd7b-4660-8175-ff8062f7bf78	NO	Not Available	Not Available	Not Available	15	-24319	Not Applicable	0	31	Not Available																									Not Available
TCGA-AA-A00N	122	Dead	T4	N0	M0	Stage IIB				75	Cecum	TCGA-AA-A00N	e457344d-76fb-46bf-b362-61a6e811d131	NO	Not Available	Not Available	Not Available	15	-27667	122	0	Not Available	Not Available																									Not Available
TCGA-AA-3558	638	Alive	T2	N0	M0	Stage I				70	Sigmoid Colon	TCGA-AA-3558	a56d528b-238a-4556-92c8-7645304a2da0	NO	Not Available	Not Available	Not Available	18	-25752	Not Applicable	0	0	Not Available																									Not Available
TCGA-AA-3679	457	Alive	T3	N2	M1	Stage IV				59	Descending Colon	TCGA-AA-3679	d17a2ab0-faef-40de-a87d-1291868b200d	NO	Not Available	Not Available	Not Available	18	-21611	Not Applicable	0	30	Not Available		TCGA-AA-3679-D37459;TCGA-AA-3679-D37460;TCGA-AA-3679-D37461;TCGA-AA-3679-D37462	190D149A-867E-4A51-AC82-5253C7C98D08;547AD4AC-2155-44BE-A664-9C74D157121B;840B021A-FBFE-4ED4-944D-A1B47F95B6A6;AED3958D-DA22-4743-AE53-4EF7F530F02B	Not Available;Not Available;Not Available;Not Available	3;3;3;3	Not Available;Not Available;Not Available;Not Available	61;61;61;61	Folinic acid;5-Fluorouracil;Irinotecan;Bevacizumab	Not Applicable;Not Applicable;Not Applicable;Not Applicable	12;12;12;12	Not Available;Not Available;Not Available;Not Available	Not Available;Not Available;Not Available;Not Available	Not Available;Not Available;Not Available;Not Available	Not Available;Not Available;Not Available;Not Available	Not Applicable;Not Applicable;Not Applicable;Not Applicable	Not Available;Not Available;Not Available;Not Available	Not Available;Not Available;Not Available;Not Available	YES;YES;YES;YES	Chemotherapy;Chemotherapy;Chemotherapy;Targeted Molecular therapy	Not Available;Not Available;Not Available;Not Available	Not Available;Not Available;Not Available;Not Available	Not Available;Not Available;Not Available;Not Available	NO;NO;NO;NO	2012;2012;2012;2012	Not Available
TCGA-F4-6856	1074	Alive	T2	N0	M0	Stage I				45	Cecum	TCGA-F4-6856	64bd568d-0509-48fe-8d0a-aef2a85d5c57	NO	Not Available	Not Available	Not Available	7	-16519	Not Applicable	0	20	Not Available		TCGA-F4-6856-D63483;TCGA-F4-6856-D63488	033361EE-254A-46F4-99D4-61E8F52D027B;62D6AB27-A225-4519-9D76-92ACDD34CADF	Not Available;Not Available	11;11	41;41	11;11	Leucovorin;5-Fluorouracil	Complete Response;Complete Response	8;8	Not Available;Not Available	Not Available;Not Available	Not Available;Not Available	Not Available;Not Available	Not Applicable;Not Applicable	Not Available;Not Available	Not Available;Not Available	NO;NO	Ancillary;Chemotherapy	Not Available;Not Available	Not Available;Not Available	Not Available;Not Available	NO;NO	2014;2014	NOT HISPANIC OR LATINO
TCGA-DM-A1HA	2600	Alive	T3	N2	M0	Stage IIIC				82	Ascending Colon	TCGA-DM-A1HA	56c8b812-ca8e-4eb2-b0fe-f264316789bf	YES	Normal	Not Available	YES	Not Available	-30272	Not Applicable	0	2600	2600																									NOT HISPANIC OR LATINO
TCGA-5M-AAT6	290	Dead	T4a	N2b	M1a	Stage IV				40	Transverse Colon	TCGA-5M-AAT6	CE00896A-F7D2-4123-BB95-24CB6E53FC32	Not Available	Not Available	Not Available	YES	27	-14852	290	0	Not Available	Not Available																									HISPANIC OR LATINO
TCGA-CM-5860	974	Alive	T3	N0	M0	Stage IIA				44	Ascending Colon	TCGA-CM-5860	96e013d9-8e89-46a7-8d07-bae95af36708	NO	Not Available	Not Available	NO	11	-16344	Not Applicable	0	304	Not Available		TCGA-CM-5860-D15254;TCGA-CM-5860-D15257;TCGA-CM-5860-D15258;TCGA-CM-5860-D15253	4ba86384-0a23-4be8-8325-35f6d8b205df;adf45a83-5b88-431b-b19c-a7c9ef785048;a83b56b5-b668-4477-b60c-6df4812fea50;615d6a0c-5eb5-45db-9971-0001fd1f9cd8	Not Available;Not Available;Not Available;Not Available	15;15;15;15	211;211;211;197	57;57;57;57	Leucovorin;Fluorouracil;Fluorouracil;Oxaliplatin	Not Available;Not Available;Not Available;Not Available	8;8;8;8	12;12;12;11	850;850;2602.17;180	mg;mg;mg;mg	ADJUVANT;ADJUVANT;ADJUVANT;ADJUVANT	Not Applicable;Not Applicable;Not Applicable;Not Applicable	1;1;1;1	IV;IV;IV;IV	NO;NO;NO;NO	Other, specify in notes;Chemotherapy;Chemotherapy;Chemotherapy	Ancillary agent;Not Available;Not Available;Not Available	7680;9800;30402.17;1940	mg;mg;mg;mg	Not Available;Not Available;Not Available;Not Available	2011;2011;2011;2011	NOT HISPANIC OR LATINO
TCGA-A6-A56B	1711	Dead	T3	N1	M0	Stage IIIB				57	Sigmoid Colon	TCGA-A6-A56B	74A0264D-1D31-430D-9A88-E7334C8AA96C	NO	Not Available	15	YES	10	-20903	Not Applicable	0	1595	Not Available		TCGA-A6-A56B-D42088;TCGA-A6-A56B-D42089;TCGA-A6-A56B-D42090;TCGA-A6-A56B-D42091;TCGA-A6-A56B-D42092	07E34E9E-9C88-42C3-9978-261BEA4751F6;4222D044-05CB-4518-9BAC-DB508925FB7E;0D9ACB99-4600-4500-A13E-6F8C9A486B11;06E9668D-3E5E-4CC8-A928-31E4FFE59F82;E4C65970-C55E-48AF-A90D-85AC6045F18C	Not Available;Not Available;Not Available;Not Available;Not Available	10;10;10;10;10	110;236;236;238;243	82;82;82;82;82	Fluorouracil;Leucovorin;Oxaliplatin;Fluorouracil;Cetuximab	Complete Response;Complete Response;Complete Response;Complete Response;Complete Response	4;4;4;4;4	Not Available;Not Available;Not Available;Not Available;Not Available	Not Available;Not Available;Not Available;Not Available;Not Available	Not Available;Not Available;Not Available;Not Available;Not Available	Not Available;Not Available;Not Available;Not Available;Not Available	Not Applicable;Not Applicable;Not Applicable;Not Applicable;Not Applicable	Not Available;Not Available;Not Available;Not Available;Not Available	Not Available;Not Available;Not Available;Not Available;Not Available	NO;NO;NO;NO;NO	Chemotherapy;Ancillary;Chemotherapy;Chemotherapy;Targeted Molecular therapy	Not Available;Not Available;Not Available;Not Available;Not Available	Not Available;Not Available;Not Available;Not Available;Not Available	Not Available;Not Available;Not Available;Not Available;Not Available	YES;YES;YES;YES;YES	2013;2013;2013;2013;2013	NOT HISPANIC OR LATINO
TCGA-G4-6322	792	Alive	T3	N1	MX	Stage IIIB				65	Descending Colon	TCGA-G4-6322	b3fea9bb-53f9-4ddb-922d-b570562d7a7d	NO	Not Available	Not Available	YES	13	-23825	Not Applicable	0	547	Not Available		TCGA-G4-6322-D21961;TCGA-G4-6322-D21963;TCGA-G4-6322-D21962	609871f8-cee5-4029-bf5c-1f625ca7472f;9f9a389b-abde-4403-819f-44e648bcc4b2;48474a61-d438-4c32-8b45-e077144102f9	Not Available;Not Available;Not Available	30;30;30	190;190;190	36;36;36	Oxaliplatin;Leucovorin;Fluorouracil	Not Available;Not Available;Not Available	1;1;1	12;12;12	180;844;844	mg;mg;mg	ADJUVANT;ADJUVANT;ADJUVANT	Not Applicable;Not Applicable;Not Applicable	1;1;1	IV;IV;IV	NO;NO;NO	Chemotherapy;Chemotherapy;Chemotherapy	Not Available;Not Available;Not Available	2148;10096;10096	mg;mg;mg	Not Available;Not Available;Not Available	2012;2012;2012	NOT HISPANIC OR LATINO
TCGA-AA-3850	0	Dead	T2	N0	M0	Stage I				74	Transverse Colon	TCGA-AA-3850	21bdad0d-c6a2-428c-b2b4-0de282b34abc	NO	Not Available	Not Available	Not Available	18	-27090	0	0	Not Available	Not Available																									Not Available
TCGA-AA-3858	945	Alive	T2	N0	M0	Stage I				67	Sigmoid Colon	TCGA-AA-3858	44c2854e-3f8c-48e1-b4d5-1b5778d4fce4	NO	Not Available	Not Available	Not Available	18	-24806	Not Applicable	0	0	Not Available																									Not Available
TCGA-DM-A1D8	383	Dead	T3	N1						50	Ascending Colon	TCGA-DM-A1D8	92c043b6-8d53-4c1c-808a-c4be5e2926e6	YES	Normal	Not Available	Not Available	Not Available	-18311	383	0	383	383																									NOT HISPANIC OR LATINO
TCGA-A6-6137	824	Alive	T3	N1c	M0	Stage IIIB				55	Hepatic Flexure	TCGA-A6-6137	326c1637-ea91-4006-b440-d38420af1ae5	NO	Not Available	Not Available	NO	14	-20095	Not Applicable	0	195	Not Available		TCGA-A6-6137-D18041;TCGA-A6-6137-D18039;TCGA-A6-6137-D18042	49b125ba-8d58-4fcc-8642-e6904a9d2eea;2c4dc053-3db9-4821-8c56-1a278c580100;2b2b0da3-33bf-4d8f-bb44-a404410e818d	Not Available;Not Available;Not Available	3;3;3	218;211;218	28;28;28	Fluorouracil;Oxaliplatin;Leucovorin	Not Available;Not Available;Not Available	11;11;11	3;3;3	1000-1070;177-182;50-200	mg;mg;mg	ADJUVANT;ADJUVANT;ADJUVANT	Not Applicable;Not Applicable;Not Applicable	1;1;1	IV;IV;IV	NO;NO;NO	Chemotherapy;Chemotherapy;Other, specify in notes	Not Available;Not Available;Ancillary	18070;1619;1450	mg;mg;mg	Not Available;Not Available;Not Available	2011;2011;2011	NOT HISPANIC OR LATINO
TCGA-D5-6931	365	Alive	T4b	N2	M0	Stage IIIC				77	Transverse Colon	TCGA-D5-6931	5d66191d-da49-4d7e-89a4-a382db338340	NO	Not Available	Not Available	NO	21	-28292	Not Applicable	0	43	Not Available																									NOT HISPANIC OR LATINO
TCGA-G4-6628	2424	Alive	T2	N0	M0	Stage I				78	Cecum	TCGA-G4-6628	2c0a725a-e829-4d84-89d9-d0d47f6cfa37	NO	Not Available	Not Available	YES	2	-28772	Not Applicable	0	1606	Not Available																									NOT HISPANIC OR LATINO
TCGA-G4-6314	1093	Alive	T3	N2	M1	Stage IV				76	Cecum	TCGA-G4-6314	abe658e0-33f9-4f57-849b-dec4d20964d6	YES	Normal	Not Available	YES	13	-27958	Not Applicable	0	1031	Not Available		TCGA-G4-6314-D21814;TCGA-G4-6314-D21821;TCGA-G4-6314-D21817;TCGA-G4-6314-D21815;TCGA-G4-6314-D21810;TCGA-G4-6314-D21822;TCGA-G4-6314-D21819;TCGA-G4-6314-D21813	e59c220a-3767-418d-a106-a86a8ac11057;6b644f7b-34e8-4860-ab40-d199dd3202cd;cf59cdd0-7a94-4432-90cf-15a5b6c41bc2;7e1069d3-9265-49bc-a9dd-2004971ed7bb;17ca7309-e359-4399-9b2f-67b7fbe11468;1b0ba903-4ca7-483f-bf97-9e3138b7afdc;25e50ae8-9511-4f12-b1c4-73a2e8b2b2cc;d2536ed5-5f4a-4cda-a592-2ff4aac998f2	Not Available;Not Available;Not Available;Not Available;Not Available;Not Available;Not Available;Not Available	9;9;9;9;9;9;9;9	209;1045;561;561;209;1045;561;181	103;954;337;337;48;954;337;48	Fluorouracil;Cetuximab;Leucovorin;Bevacizumab;Leucovorin;Irinotecan;Irinotecan;Oxaliplatin	Not Available;Not Available;Not Available;Not Available;Not Available;Not Available;Not Available;Not Available	2;2;2;2;2;2;2;2	8;7;17;17;12;7;17;10	752;825;740;386;756;165;240;160	mg;mg;mg;mg;mg;mg;mg;mg	ADJUVANT;PROGRESSION;PROGRESSION;PROGRESSION;ADJUVANT;PROGRESSION;PROGRESSION;ADJUVANT	Not Applicable;Not Applicable;Not Applicable;Not Applicable;Not Applicable;Not Applicable;Not Applicable;Not Applicable	2;4;3;3;1;4;3;1	IV;IV;IV;IV;IV;IV;IV;IV	NO;NO;NO;NO;NO;NO;NO;NO	Chemotherapy;Chemotherapy;Chemotherapy;Chemotherapy;Chemotherapy;Chemotherapy;Chemotherapy;Chemotherapy	Not Available;Not Available;Not Available;Not Available;Not Available;Not Available;Not Available;Not Available	6000;5765;12464;6404;8976;1085;3874;1577	mg;mg;mg;mg;mg;mg;mg;mg	Not Available;Not Available;Not Available;Not Available;Not Available;Not Available;Not Available;Not Available	2012;2012;2012;2012;2012;2012;2012;2012	NOT HISPANIC OR LATINO
TCGA-AA-3697	2587	Alive	T3	N0	M0	Stage II				77	Sigmoid Colon	TCGA-AA-3697	dde411b2-5d2b-4638-8149-89bc1eb3c7ad	NO	Not Available	Not Available	Not Available	18	-28367	Not Applicable	0	30	Not Available																									Not Available
TCGA-A6-6780	612	Alive	T3	N0	MX	Stage IIA		FPPP	TCGA	74	Discrepancy	TCGA-A6-6780	88832340-46ad-449c-8f81-6a8e5b495510	NO	Not Available	Not Available	NO	11	-27250	Not Applicable	0	87	Not Available																									NOT HISPANIC OR LATINO
TCGA-AD-6889	2532	Dead	T3	N0	M0	Stage IIA				76	Ascending Colon	TCGA-AD-6889	955464c8-9c62-430c-87b8-107db5c980a8	NO	Not Available	Not Available	Not Available	12	Not Available	Not Applicable	0	1720	Not Available		TCGA-AD-6889-D47707	2285FF7F-F87C-4232-BE93-94606723E640	Not Available	28	Not Available	42	Xeloda	Complete Response	8	Not Available	Not Available	Not Available	Not Available	Not Applicable	Not Available	Not Available	NO	Chemotherapy	Not Available	Not Available	Not Available	YES	2013	Not Available
TCGA-AA-A02O	28	Alive	T3	N0	M0	Stage II				82	Transverse Colon	TCGA-AA-A02O	6fa41234-9077-4d05-a295-6820f3bedf5b	NO	Not Available	Not Available	Not Available	15	-30288	Not Applicable	0	28	Not Available																									Not Available
TCGA-F4-6703	1456	Alive	T3	N0	M0	Stage IIA				64	Ascending Colon	TCGA-F4-6703	0c53b010-4243-4da3-a059-7f54c9a850ec	Not Available	Not Available	Not Available	NO	23	-23644	Not Applicable	0	56	Not Available																									NOT HISPANIC OR LATINO
TCGA-A6-6648	766	Alive	T3	N0	M1a	Stage IVA				56	Discrepancy	TCGA-A6-6648	65056295-8fcd-4f82-a3c9-a5acd79521fe	NO	Not Available	Not Available	NO	16	-20641	Not Applicable	0	253	Not Available		TCGA-A6-6648-D17990;TCGA-A6-6648-D17991;TCGA-A6-6648-D17989;TCGA-A6-6648-D17992	999f6885-13bd-4180-ac46-94bb3a6e01e1;4786b23e-8b48-48c6-bfee-d431500e366a;a356522b-2132-46f8-a9d8-7c380201e8ba;186076eb-7755-4b35-8e49-fd1156a8beea	Not Available;Not Available;Not Available;Not Available	1;1;1;1	91;91;77;93	63;63;63;63	Oxaliplatin;Leucovorin;Cetuximab Study drug;5 FU	Not Available;Not Available;Not Available;Not Available	11;11;11;11	1;1;1;1	180;840-850;1050;6300	mg;mg;mg;mg	OTHER, SPECIFY IN NOTES;OTHER, SPECIFY IN NOTES;OTHER, SPECIFY IN NOTES;OTHER, SPECIFY IN NOTES	Metastatic;Metastatic;Metastatic;Metastatic	1;1;1;1	IV;IV;IV;IV	NO;NO;NO;NO	Discrepancy;Discrepancy;Discrepancy;Discrepancy	Discrepancy;Discrepancy;Discrepancy;Discrepancy	540;2540;Not Available;18900	mg;mg;mg;mg	Not Available;Not Available;Not Available;Not Available	2011;2011;2011;2011	NOT HISPANIC OR LATINO
TCGA-AA-A01G	365	Alive	T3	N0	M0	Stage IIA				63	Cecum	TCGA-AA-A01G	6f2b5a14-569c-4084-8c67-b1a44d787897	NO	Not Available	Not Available	Not Available	15	-23133	Not Applicable	0	31	Not Available																									Not Available
TCGA-DM-A288	427	Dead	T3	N2	M0	Stage IIIC				68	Cecum	TCGA-DM-A288	143F2DD6-A280-41C5-9242-442EF91B73EC	NO	Not Available	Not Available	Not Available	27	-25084	427	0	427	Not Available																									NOT HISPANIC OR LATINO
TCGA-AZ-6601	3042	Dead	T3	N0	M0	Stage II				68	Sigmoid Colon	TCGA-AZ-6601	7ad0617e-bc4a-4869-8419-744f04d9b7a3	Not Available	Not Available	Not Available	Not Available	15	-25082	3042	0	Not Available	Not Available																									NOT HISPANIC OR LATINO
TCGA-DM-A1HB	4126	Alive	T3	N1	M0	Stage IIIB				75	Transverse Colon	TCGA-DM-A1HB	8C0894FB-5E78-40AE-BE0B-329CA30F758A	YES	Abnormal	Not Available	NO	Not Available	-27708	Not Applicable	0	3786	3786																									NOT HISPANIC OR LATINO
TCGA-A6-2686	1126	Dead	T3	N0	M0	Stage IIA				81	Cecum	TCGA-A6-2686	19d1a5fc-3ce9-4e43-a364-a4150bcf911b	NO	Not Available	Not Available	NO	19	-29623	Not Applicable	0	488	Not Available																									NOT HISPANIC OR LATINO
TCGA-D5-6926	275	Alive	T4a	N1	M0	Stage IIIB				65	Sigmoid Colon	TCGA-D5-6926	3a8ca50f-bc9f-4250-8c8d-22893763ea46	NO	Not Available	Not Available	NO	18	-23768	Not Applicable	0	95	Not Available		TCGA-D5-6926-D29710	b896f753-4ea9-43d6-a893-529e05927fbb	Not Available	28	196	42	5-Fluorouracil + leucovorin	Not Available	3	6	Not Available	mg/m2	ADJUVANT	Not Applicable	Not Available	IV	NO	Chemotherapy	Not Available	Not Available	mg	Not Available	2012	NOT HISPANIC OR LATINO
TCGA-AA-3870	912	Alive	T3	N2	M1	Stage IV				71	Ascending Colon	TCGA-AA-3870	beb63625-d9bf-4ccd-bc53-635b53d24240	NO	Not Available	Not Available	Not Available	18	-26086	Not Applicable	0	0	Not Available		TCGA-AA-3870-D37497;TCGA-AA-3870-D37498;TCGA-AA-3870-D37499	A524BF8C-3693-4873-8114-6CC5177E2C3D;D94292F6-51D0-454D-B608-9D1D674D5981;C0DDC956-119F-4DAE-B704-8917CA66D803	Not Available;Not Available;Not Available	3;3;3	212;212;153	30;30;30	Folinic acid;5-Fluorouracil;Oxaliplatin	Complete Response;Complete Response;Complete Response	12;12;12	Not Available;Not Available;Not Available	Not Available;Not Available;Not Available	Not Available;Not Available;Not Available	Not Available;Not Available;Not Available	Not Applicable;Not Applicable;Not Applicable	Not Available;Not Available;Not Available	Not Available;Not Available;Not Available	NO;NO;NO	Chemotherapy;Chemotherapy;Chemotherapy	Not Available;Not Available;Not Available	Not Available;Not Available;Not Available	Not Available;Not Available;Not Available	NO;NO;NO	2012;2012;2012	Not Available
TCGA-D5-6530	621	Alive	T2	N0	M0	Stage I				53	Discrepancy	TCGA-D5-6530	f89bbd17-c732-4847-b71c-a8627a702747	NO	Not Available	40	NO	9	-19591	Not Applicable	0	271	Not Available																									NOT HISPANIC OR LATINO
TCGA-CA-5254	386	Alive	T3	N0	M0	Stage IIA				42	Transverse Colon	TCGA-CA-5254	26a41625-4680-47b2-afa9-6a72b148e1c0	Not Available	Not Available	Not Available	Not Available	8	-15415	Not Applicable	0	5	Not Available		TCGA-CA-5254-D70898;TCGA-CA-5254-D70899;TCGA-CA-5254-D70900	6190AB74-8B52-4AE1-AE80-30570CA4BD5A;B70702AA-8E86-45A0-BF1D-43057580E3D6;7C8A2022-E668-46AD-A54F-04CFC91BA4D1	Not Available;Not Available;Not Available	10;10;10	204;204;204	50;50;50	oxaliplatin;5-Fluorouracil;Folinic Acid	Complete Response;Complete Response;Complete Response	3;3;3	Not Available;Not Available;Not Available	Not Available;Not Available;Not Available	Not Available;Not Available;Not Available	Not Available;Not Available;Not Available	Not Applicable;Not Applicable;Not Applicable	Not Available;Not Available;Not Available	Not Available;Not Available;Not Available	NO;NO;NO	Chemotherapy;Chemotherapy;Chemotherapy	Not Available;Not Available;Not Available	Not Available;Not Available;Not Available	Not Available;Not Available;Not Available	NO;NO;NO	2015;2015;2015	NOT HISPANIC OR LATINO
TCGA-AA-3971	489	Alive	T3	N1	M0	Stage III				58	Sigmoid Colon	TCGA-AA-3971	10994156-7c2f-420e-aeb8-11d566b3d5e4	NO	Not Available	Not Available	Not Available	18	-21518	Not Applicable	0	0	Not Available		TCGA-AA-3971-D37423;TCGA-AA-3971-D37424;TCGA-AA-3971-D37425	5F0380B5-59E5-4BB8-B7AC-1DD2C7E02145;F71B9357-6613-4BF8-8F2D-9B49B35F1912;969A32A8-5D14-4A37-9062-DAF425EA1C5B	Not Available;Not Available;Not Available	3;3;3	215;215;215	31;31;31	Folinic acid;5-Fluorouracil;Oxaliplatin	Complete Response;Complete Response;Complete Response	12;12;12	Not Available;Not Available;Not Available	Not Available;Not Available;Not Available	Not Available;Not Available;Not Available	Not Available;Not Available;Not Available	Not Applicable;Not Applicable;Not Applicable	Not Available;Not Available;Not Available	Not Available;Not Available;Not Available	NO;NO;NO	Chemotherapy;Chemotherapy;Chemotherapy	Not Available;Not Available;Not Available	Not Available;Not Available;Not Available	Not Available;Not Available;Not Available	NO;NO;NO	2012;2012;2012	Not Available
TCGA-D5-6928	354	Alive	T3	N0	M0	Stage IIA				80	Ascending Colon	TCGA-D5-6928	eecaa5cd-0b69-4af2-a782-035025f207b6	NO	Not Available	65	NO	18	-29411	Not Applicable	0	20	Not Available																									NOT HISPANIC OR LATINO
TCGA-CM-6169	396	Alive	T3	N0	M0	Stage IIA				67	Cecum	TCGA-CM-6169	8e87ddca-f43e-4c6f-9d5b-430b666a7f6c	NO	Not Available	Not Available	NO	19	-24564	Not Applicable	0	243	Not Available		TCGA-CM-6169-D15236;TCGA-CM-6169-D15240;TCGA-CM-6169-D15238;TCGA-CM-6169-D15215	7997d2ef-1c60-43b9-9096-e0c4fe13dea2;bcc4b8af-2a42-4ea6-b631-67417436a9e2;11bdf997-2b4c-4fd3-a358-3621721d4fa8;d843573b-abb6-4375-b320-65b6e417f688	Not Available;Not Available;Not Available;Not Available	15;15;15;15	243;243;243;159	89;89;89;89	Leucovorin;Fluorouracil;Fluorouracil;Oxaliplatin	Not Available;Not Available;Not Available;Not Available	8;8;8;8	12;12;12;6	850;2600;850;180	mg;mg;mg;mg	ADJUVANT;ADJUVANT;ADJUVANT;ADJUVANT	Not Applicable;Not Applicable;Not Applicable;Not Applicable	1;1;1;1	IV;IV;IV;IV	NO;NO;NO;NO	Other, specify in notes;Chemotherapy;Chemotherapy;Chemotherapy	Ancillary agent;Not Available;Not Available;Not Available	7050;31200;10200;1080	mg;mg;mg;mg	Not Available;Not Available;Not Available;Not Available	2011;2011;2011;2011	NOT HISPANIC OR LATINO
TCGA-CA-6716	371	Alive	T3	N0	M0	Stage IIA				65	Ascending Colon	TCGA-CA-6716	95a54459-3fac-42d5-8ec1-ed66d971d64d	Not Available	Not Available	Not Available	Not Available	8	-23943	Not Applicable	0	8	Not Available		TCGA-CA-6716-D70865;TCGA-CA-6716-D70867;TCGA-CA-6716-D70869	5685C16B-388E-4342-84D9-0156CCCC3F43;5260D8B7-8E40-4BB5-BA69-A1C26F5C97F2;1824EB06-30F9-4726-A683-F2313A935926	Not Available;Not Available;Not Available	10;10;10	226;226;226	42;42;42	oxaliplatin;5-Fluorouracil;Folinic Acid	Complete Response;Complete Response;Complete Response	3;3;3	Not Available;Not Available;Not Available	Not Available;Not Available;Not Available	Not Available;Not Available;Not Available	Not Available;Not Available;Not Available	Not Applicable;Not Applicable;Not Applicable	Not Available;Not Available;Not Available	Not Available;Not Available;Not Available	NO;NO;NO	Chemotherapy;Chemotherapy;Chemotherapy	Not Available;Not Available;Not Available	Not Available;Not Available;Not Available	Not Available;Not Available;Not Available	NO;NO;NO	2015;2015;2015	NOT HISPANIC OR LATINO
TCGA-AA-3875	549	Alive	T1	N0	M0	Stage I				78	Ascending Colon	TCGA-AA-3875	5498d5ef-ad24-4034-9750-7c996c5355e1	NO	Not Available	Not Available	Not Available	18	-28640	Not Applicable	0	0	Not Available																									Not Available
TCGA-CM-6161	457	Alive	T2	N0	M0	Stage I				36	Sigmoid Colon	TCGA-CM-6161	3470b1af-689f-467a-9f9e-de74088f9b94	NO	Not Available	Not Available	YES	19	-13363	Not Applicable	0	212	Not Available																									NOT HISPANIC OR LATINO
TCGA-AA-3675	1431	Alive	T3	N0	M0	Stage II				84	Hepatic Flexure	TCGA-AA-3675	41658cf8-0de1-4a97-bb60-0f0107c84e00	NO	Not Available	Not Available	Not Available	18	-30801	Not Applicable	0	31	Not Available																									Not Available
TCGA-AD-6899	176	Dead	T4a	N2b	MX	Stage IIIC				84	Cecum	TCGA-AD-6899	ea923671-3903-4a79-830d-e7e4b1eabab0	Not Available	Not Available	1	NO	25	-30693	Not Applicable	0	48	Not Available																									Not Available
TCGA-A6-6652	751	Alive	T3	N0	M1	Stage IVA				59	Sigmoid Colon	TCGA-A6-6652	96ac1f4b-79b0-4517-8caf-fc05abcaaf4f	NO	Not Available	Not Available	YES	15	-21638	Not Applicable	0	135	Not Available		TCGA-A6-6652-D30459;TCGA-A6-6652-D30908;TCGA-A6-6652-D30907;TCGA-A6-6652-D30909;TCGA-A6-6652-D30910	8eac1749-f057-4382-af62-127ed368dd65;c13ce170-4baf-4507-9eda-d0f4897f8151;3a8d9c47-535d-49bc-8901-149af8ad9273;f0c12b8f-7c6f-4be3-8c5e-c2e71bf85879;2cfdae08-2b02-48d5-b9ea-12f073efa831	Not Available;Not Available;Not Available;Not Available;Not Available	18;18;19;19;19	Not Available;Not Available;254;Not Available;Not Available	86;86;86;86;86	Cetuximab;Leucovorin;Oxaliplatin;Fluorouracil;Fluorouracil	Not Applicable;Not Applicable;Stable Disease;Not Applicable;Not Applicable	4;4;4;4;4	Not Available;Not Available;Not Available;Not Available;Not Available	Not Available;Not Available;Not Available;Not Available;Not Available	Not Available;Not Available;Not Available;Not Available;Not Available	Not Available;Not Available;Not Available;Not Available;Not Available	Not Applicable;Not Applicable;Not Applicable;Not Applicable;Not Applicable	Not Available;Not Available;Not Available;Not Available;Not Available	Not Available;Not Available;Not Available;Not Available;Not Available	YES;YES;NO;YES;YES	Targeted Molecular therapy;Ancillary;Chemotherapy;Chemotherapy;Chemotherapy	Not Available;Not Available;Not Available;Not Available;Not Available	Not Available;Not Available;Not Available;Not Available;Not Available	Not Available;Not Available;Not Available;Not Available;Not Available	YES;YES;YES;YES;YES	2012;2012;2012;2012;2012	NOT HISPANIC OR LATINO
TCGA-AA-A00F	1035	Alive	T3	N2	M0	Stage IIIC				66	Sigmoid Colon	TCGA-AA-A00F	60ad2c8a-6bbf-43fc-ae73-cc1f6d6c163c	NO	Not Available	Not Available	Not Available	15	-24379	Not Applicable	0	0	Not Available		TCGA-AA-A00F-D37417;TCGA-AA-A00F-D37418;TCGA-AA-A00F-D37419	A79924C7-E384-46D8-9AA7-C45D0D21E753;41FF725E-E12B-4A08-8828-37F0E889E44E;157B2E65-0CA0-485B-9762-7F17FCBD7934	Not Available;Not Available;Not Available	3;3;3	213;213;213	61;61;61	Folinic acid;5-Fluorouracil;Oxaliplatin	Partial Response;Partial Response;Partial Response	12;12;12	Not Available;Not Available;Not Available	Not Available;Not Available;Not Available	Not Available;Not Available;Not Available	Not Available;Not Available;Not Available	Not Applicable;Not Applicable;Not Applicable	Not Available;Not Available;Not Available	Not Available;Not Available;Not Available	NO;NO;NO	Chemotherapy;Chemotherapy;Chemotherapy	Not Available;Not Available;Not Available	Not Available;Not Available;Not Available	Not Available;Not Available;Not Available	NO;NO;NO	2012;2012;2012	Not Available
TCGA-AA-A00O	822	Alive	T3	N2	M0	Stage IIIC				83	Sigmoid Colon	TCGA-AA-A00O	01f493d4-229d-47a6-baa8-32a342c65d01	NO	Not Available	Not Available	Not Available	15	-30316	Not Applicable	0	0	Not Available																									Not Available
TCGA-D5-6531	540	Alive	T3	N0	M0	Stage IIA				75	Hepatic Flexure	TCGA-D5-6531	e4c0d890-a634-48bd-9108-e674532b0d2e	Not Available	Not Available	Not Available	Not Available	13	-27633	Not Applicable	0	17	Not Available																									NOT HISPANIC OR LATINO
TCGA-A6-6654	726	Alive	T3	N1	M0	Stage IIIB				65	Descending Colon	TCGA-A6-6654	81e7cca8-2d71-4446-9692-872c2fe68d0a	NO	Not Available	Not Available	Not Available	16	-23953	Not Applicable	0	178	Not Available		TCGA-A6-6654-D29549;TCGA-A6-6654-D29785;TCGA-A6-6654-D29787;TCGA-A6-6654-D29786	85858a5a-2a25-49e2-964e-5508bef1349c;4904bd04-a129-4cfa-9261-34f59d0ab226;f603532b-fd11-437c-ac3b-3467cf35c2ef;a044ff74-4c3b-4a2e-b545-074c96ff4752	Not Available;Not Available;Not Available;Not Available	22;28;28;28	276;290;292;290	136;136;136;136	Oxaliplatin;Leucovorin;5 FU;5 FU	Not Available;Not Available;Not Available;Not Available	3;3;3;3	11;12;12;12	80-180;350-850;4800-5100;800-850	mg;mg;mg;mg	ADJUVANT;ADJUVANT;ADJUVANT;ADJUVANT	Not Applicable;Not Applicable;Not Applicable;Not Applicable	1;1;1;1	IV;IV;IV;IV	NO;NO;NO;NO	Chemotherapy;Other, specify in notes;Chemotherapy;Chemotherapy	Not Available;Ancillary;Not Available;Not Available	1640;6100;60300;10050	mg;mg;mg;mg	Not Available;Not Available;Not Available;Not Available	2012;2012;2012;2012	NOT HISPANIC OR LATINO
TCGA-NH-A8F7	543	Alive	T3	N0	MX	Stage IIA				53	Sigmoid Colon	TCGA-NH-A8F7	6454FF0C-26F8-4CC2-B77C-7E5ABDC20ACD	NO	Not Available	Not Available	NO	19	-19535	Not Applicable	0	158	Not Available		TCGA-NH-A8F7-D56709;TCGA-NH-A8F7-D56710;TCGA-NH-A8F7-D56711;TCGA-NH-A8F7-D67148;TCGA-NH-A8F7-D67149	F230456E-0328-4F0F-95A1-8D60F7CEA832;F0209F5E-3A9E-49B9-9A3B-9896B8E2E4C6;28D39D44-463B-4B21-A04E-B6C5ABD0A0DD;DA840463-6BA2-4192-ADCD-5837BB952757;F3DB5B7D-5099-444B-B993-6B84A5F90C3A	Not Available;Not Available;Not Available;Not Available;Not Available	19;19;19;31;31	228;228;249;Not Available;397	74;74;74;245;334	FLUOROURACIL;OXALIPLATIN;BEVACIZUMAB;XELODA;BEVACIZUMAB	Partial Response;Partial Response;Partial Response;Not Applicable;Unknown	2;2;2;10;10	Not Available;Not Available;Not Available;Not Available;Not Available	Not Available;Not Available;Not Available;Not Available;Not Available	Not Available;Not Available;Not Available;Not Available;Not Available	Not Available;Not Available;Not Available;Not Available;Not Available	Not Applicable;Not Applicable;Not Applicable;Not Applicable;Not Applicable	Not Available;Not Available;Not Available;Not Available;Not Available	Not Available;Not Available;Not Available;Not Available;Not Available	NO;NO;NO;YES;NO	Chemotherapy;Chemotherapy;Immunotherapy;Chemotherapy;Immunotherapy	Not Available;Not Available;Not Available;Not Available;Not Available	Not Available;Not Available;Not Available;Not Available;Not Available	Not Available;Not Available;Not Available;Not Available;Not Available	NO;NO;NO;NO;NO	2014;2014;2014;2014;2014	NOT HISPANIC OR LATINO
TCGA-AA-A010	1064	Alive	T4	N0	M0	Stage IIB				46	Transverse Colon	TCGA-AA-A010	0712566e-3371-4715-95f1-5b792e72d758	NO	Not Available	Not Available	Not Available	15	-16922	Not Applicable	0	0	Not Available		TCGA-AA-A010-D37410;TCGA-AA-A010-D37411;TCGA-AA-A010-D37412	F4C201FC-604D-4378-BF80-1D0B46DC40EF;196D63A5-A0C3-4567-B52C-C80754DC5D60;5E8AE646-9F65-4EE8-BED1-F1874A391471	Not Available;Not Available;Not Available	3;3;3	183;183;183	0;0;0	Folinic acid;5-Fluorouracil;Oxaliplatin	Complete Response;Complete Response;Complete Response	12;12;12	Not Available;Not Available;Not Available	Not Available;Not Available;Not Available	Not Available;Not Available;Not Available	Not Available;Not Available;Not Available	Not Applicable;Not Applicable;Not Applicable	Not Available;Not Available;Not Available	Not Available;Not Available;Not Available	NO;NO;NO	Chemotherapy;Chemotherapy;Chemotherapy	Not Available;Not Available;Not Available	Not Available;Not Available;Not Available	Not Available;Not Available;Not Available	NO;NO;NO	2012;2012;2012	Not Available
TCGA-A6-2685	1133	Alive	T3	N0	M0	Stage IIA				48	Sigmoid Colon	TCGA-A6-2685	e5921d6b-51cf-44be-b295-610cf7c3a69a	NO	Not Available	Not Available	NO	2	-17757	Not Applicable	0	464	Not Available																									NOT HISPANIC OR LATINO
TCGA-AA-A00J	549	Alive	T4	N1	M0	Stage IIIB				80	Ascending Colon	TCGA-AA-A00J	56e612e8-2c29-4782-be79-2813cc8dd2e6	NO	Not Available	Not Available	Not Available	15	-29371	Not Applicable	0	0	Not Available		TCGA-AA-A00J-D37416	B3019D2B-1967-4313-8010-AE45C7D73ADA	Not Available	3	245	31	5-Fluorouracil	Partial Response	12	Not Available	Not Available	Not Available	Not Available	Not Applicable	Not Available	Not Available	NO	Chemotherapy	Not Available	Not Available	Not Available	NO	2012	Not Available
TCGA-AD-A5EK	500	Alive	T2	N0	MX	Stage I				51	Ascending Colon	TCGA-AD-A5EK	E8EC26BD-C88D-42B9-AC8A-AB121B8140F8	NO	Not Available	15	YES	12	-18731	Not Applicable	0	13	Not Available																									NOT HISPANIC OR LATINO
TCGA-CA-6717	388	Alive	T3	N0	M0	Stage IIA				57	Ascending Colon	TCGA-CA-6717	268c01b3-d2ce-44c0-a2fe-ea846a1253cc	Not Available	Not Available	Not Available	Not Available	8	-20984	Not Applicable	0	10	Not Available		TCGA-CA-6717-D70860;TCGA-CA-6717-D70861;TCGA-CA-6717-D70862	0CBC9366-A33A-4693-8D94-0F35F6A6D07B;885F39FF-3425-4DF0-9AA1-21700116EE9A;9D0EF700-AC63-4DFE-A616-CF5C42039D73	Not Available;Not Available;Not Available	10;10;10	318;318;318	128;128;128	oxaliplatin;5-Fluorouracil;Folinic Acid	Complete Response;Complete Response;Complete Response	3;3;3	Not Available;Not Available;Not Available	Not Available;Not Available;Not Available	Not Available;Not Available;Not Available	Not Available;Not Available;Not Available	Not Applicable;Not Applicable;Not Applicable	Not Available;Not Available;Not Available	Not Available;Not Available;Not Available	NO;NO;NO	Chemotherapy;Chemotherapy;Chemotherapy	Not Available;Not Available;Not Available	Not Available;Not Available;Not Available	Not Available;Not Available;Not Available	NO;NO;NO	2015;2015;2015	NOT HISPANIC OR LATINO
TCGA-CM-6170	457	Alive	T2	N0	M0	Stage I				73	Descending Colon	TCGA-CM-6170	9d8c4693-8e36-473b-bb34-a7cdc04dd223	NO	Not Available	Not Available	YES	19	-26663	Not Applicable	0	242	Not Available																									NOT HISPANIC OR LATINO
TCGA-D5-6541	474	Alive	T3	N0	M0	Stage IIA				49	Splenic Flexure	TCGA-D5-6541	39aec099-a33e-47a4-a602-cbf65ddd3830	NO	Not Available	30	Not Available	16	-18029	Not Applicable	0	108	Not Available																									NOT HISPANIC OR LATINO
TCGA-AY-6386	542	Alive	T3	N1a	M0	Stage IIIB				66	Cecum	TCGA-AY-6386	35c9264f-34ec-4d75-ab80-aaac86108fc8	NO	Not Available	Not Available	YES	1	-24453	Not Applicable	0	169	Not Available		TCGA-AY-6386-D21745;TCGA-AY-6386-D21748;TCGA-AY-6386-D21747	dcd152ef-7b0f-4554-8701-587498c2fb1b;beee8dab-75b8-4e6b-a1a8-bd422660278c;9cf53d79-7012-4ee9-bd20-adcaaa841a4c	Not Available;Not Available;Not Available	20;20;20	246;246;246	73;73;73	5FU;Oxaliplatin;Leucovorin	Not Available;Not Available;Not Available	2;2;2	12;12;12	2800;85;200	mg/m2;mg/m2;mg/m2	ADJUVANT;ADJUVANT;ADJUVANT	Not Applicable;Not Applicable;Not Applicable	1;1;1	IV;IV;IV	NO;NO;NO	Chemotherapy;Chemotherapy;Other, specify in notes	Not Available;Not Available;Ancillary agent	Not Available;Not Available;Not Available	Not Available;Not Available;Not Available	Not Available;Not Available;Not Available	2012;2012;2012	NOT HISPANIC OR LATINO
TCGA-DM-A1D9	4270	Alive	T3	N0	M0	Stage IIA				67	Cecum	TCGA-DM-A1D9	e3b6018c-ab2c-47c5-b183-a295d0110835	NO	Not Available	Not Available	YES	Not Available	-24514	Not Applicable	0	3920	3920																									NOT HISPANIC OR LATINO
TCGA-G4-6309	2600	Alive	T3	N1	M0	Stage IIIB				40	Sigmoid Colon	TCGA-G4-6309	e4be17c8-0855-432c-bb80-28bb24b62f32	NO	Not Available	Not Available	YES	2	-14729	Not Applicable	0	1386	Not Available		TCGA-G4-6309-D21947	0104d92b-90fe-42c8-9f02-dd916ce7b46f	Not Available	6	254	73	Xeloda	Not Available	2	8	3600	mg/day	ADJUVANT	Not Applicable	1	PO	NO	Chemotherapy	Not Available	355600	mg	Not Available	2012	NOT HISPANIC OR LATINO
TCGA-AA-3941	730	Alive	T4	N1b	M1a	Stage IVA				84	Ascending Colon	TCGA-AA-3941	835c3e23-ac2b-4bc9-ac65-e3e81adecf77	NO	Not Available	Not Available	Not Available	18	-31015	Not Applicable	0	31	Not Available																									Not Available
TCGA-QG-A5YX	1003	Alive	T3	N0	MX	Stage IIA				61	Sigmoid Colon	TCGA-QG-A5YX	300FFF5A-0F61-402D-B845-3938BA7B1294	NO	Not Available	25	YES	20	-22617	Not Applicable	0	526	Not Available		TCGA-QG-A5YX-D44483	07AF7F33-432C-43A3-BF5B-12A81384FB74	Not Available	20	527	42	Xeloda	Complete Response	6	Not Available	Not Available	Not Available	Not Available	Not Applicable	Not Available	Not Available	NO	Chemotherapy	Not Available	Not Available	Not Available	NO	2013	NOT HISPANIC OR LATINO
TCGA-CK-6751	518	Alive	T2	N0	MX	Stage I				88	Ascending Colon	TCGA-CK-6751	7a70f061-9a6f-408e-a416-7f5295ceba3b	NO	Not Available	Not Available	NO	Not Available	-32354	Not Applicable	0	518	Not Available																									NOT HISPANIC OR LATINO
TCGA-AA-3950	730	Alive	T3	N0	M0	Stage IIA				79	Ascending Colon	TCGA-AA-3950	cc53bf9e-5e27-4305-a08b-552120c10aa5	NO	Not Available	Not Available	Not Available	18	-29130	Not Applicable	0	31	Not Available																									Not Available
TCGA-G4-6294	858	Dead	T3	N1	M1	Stage IV				75	Cecum	TCGA-G4-6294	41f8c9fd-ae52-4458-886b-faf37de77dd0	NO	Not Available	Not Available	YES	27	-27755	858	0	Not Available	Not Available		TCGA-G4-6294-D22041;TCGA-G4-6294-D22044;TCGA-G4-6294-D22038;TCGA-G4-6294-D22047;TCGA-G4-6294-D22039;TCGA-G4-6294-D22042;TCGA-G4-6294-D22036;TCGA-G4-6294-D22045;TCGA-G4-6294-D22046;TCGA-G4-6294-D22043	0ea0145e-3a7d-40d6-b958-54abb60540af;dcdccc6a-81a7-4b9d-bf04-6561175b1d1a;ae9c5e2a-c767-42b1-a16a-9c9f73074e4d;96567c06-fd8b-432c-9b95-35f1c462b05c;7101e3e7-3beb-48f7-9c4e-8aeb5c76bc14;5a510a56-eb65-4936-9e48-2d8ecdb51c1f;f5cb0992-8578-4bd2-ba86-8513ec065440;1a072c20-b6cb-46c5-af5d-9dccfd8d1afb;fc42c0f1-55d8-42a0-8845-2934c2f3ec16;4801f827-3069-49da-9725-5b242a26f836	Not Available;Not Available;Not Available;Not Available;Not Available;Not Available;Not Available;Not Available;Not Available;Not Available	21;21;21;21;21;21;21;21;21;21	349;699;349;846;349;699;Not Available;699;699;699	1;535;1;819;1;535;1;699;699;535	Fluorouracil;Oxaliplatin;Leucovorin;Erbitux;Oxaliplatin;Leucovorin;Avastin;Irinotecan;Erbitux;Fluorouracil	Not Available;Not Available;Not Available;Not Available;Not Available;Not Available;Not Available;Not Available;Not Available;Not Available	2;2;2;2;2;2;2;2;2;2	20;13;20;4;20;13;Not Available;1;1;13	Not Available;55;Not Available;560;Not Available;Not Available;Not Available;125;Not Available;Not Available	Not Available;mg/m2;Not Available;mg;Not Available;Not Available;Not Available;mg/m2;Not Available;Not Available	ADJUVANT;PROGRESSION;ADJUVANT;PROGRESSION;ADJUVANT;PROGRESSION;ADJUVANT;PROGRESSION;PROGRESSION;PROGRESSION	Not Applicable;Not Applicable;Not Applicable;Not Applicable;Not Applicable;Not Applicable;Not Applicable;Not Applicable;Not Applicable;Not Applicable	1;2;1;4;1;2;1;3;3;2	IV;IV;IV;IV;IV;IV;IV;IV;IV;IV	NO;NO;NO;NO;NO;NO;NO;NO;NO;NO	Chemotherapy;Chemotherapy;Chemotherapy;Chemotherapy;Chemotherapy;Chemotherapy;Chemotherapy;Chemotherapy;Chemotherapy;Chemotherapy	Not Available;Not Available;Not Available;Not Available;Not Available;Not Available;Not Available;Not Available;Not Available;Not Available	Not Available;715;Not Available;1610;Not Available;Not Available;Not Available;125;Not Available;Not Available	Not Available;mg/m2;Not Available;mg;Not Available;Not Available;Not Available;mg/m2;Not Available;Not Available	Not Available;Not Available;Not Available;Not Available;Not Available;Not Available;Not Available;Not Available;Not Available;Not Available	2012;2012;2012;2012;2012;2012;2012;2012;2012;2012	NOT HISPANIC OR LATINO
TCGA-AA-3663	212	Alive	T3	N0	M0	Stage II				42	Cecum	TCGA-AA-3663	c21d2c68-920f-4526-b754-286579c049f3	NO	Not Available	Not Available	Not Available	18	-15675	Not Applicable	0	31	Not Available																									Not Available
TCGA-CM-6162	365	Alive	T3	N1a	M0	Stage IIIB				48	Ascending Colon	TCGA-CM-6162	ec3f3f11-75df-4fcc-ba03-f19aca907645	NO	Not Available	Not Available	YES	19	-17624	Not Applicable	0	212	Not Available		TCGA-CM-6162-D15247;TCGA-CM-6162-D15251;TCGA-CM-6162-D15252;TCGA-CM-6162-D15250	e7fcc21e-a928-4e42-a8ea-b0e4c41801be;22258b34-c867-40d2-86f5-1c577600455d;d1f5f997-c18a-4c1a-a070-423e4d0edcc0;d84d0e07-d035-423a-8c82-89b97d740df7	Not Available;Not Available;Not Available;Not Available	15;15;15;15	240;240;240;240	86;86;86;86	Oxaliplatin;Fluorouracil;Fluorouracil;Leucovorin	Not Available;Not Available;Not Available;Not Available	8;8;8;8	12;12;12;12	190;850-900;2700;900	mg;mg;mg;mg	ADJUVANT;ADJUVANT;ADJUVANT;ADJUVANT	Not Applicable;Not Applicable;Not Applicable;Not Applicable	1;1;1;1	IV;IV;IV;IV	NO;NO;NO;NO	Chemotherapy;Chemotherapy;Chemotherapy;Other, specify in notes	Not Available;Not Available;Not Available;Ancillary agent	2220;10500;31600;7980	mg;mg;mg;mg	Not Available;Not Available;Not Available;Not Available	2011;2011;2011;2011	NOT HISPANIC OR LATINO
TCGA-AA-3861	914	Alive	T3	N0	M0	Stage IIA				72	Cecum	TCGA-AA-3861	5da56982-6de7-4994-aa9e-3b01200b2959	NO	Not Available	Not Available	Not Available	18	-26602	Not Applicable	0	0	Not Available																									Not Available
TCGA-DM-A1D4	2821	Dead	T3	N0	M0	Stage IIA				80	Cecum	TCGA-DM-A1D4	849442d3-eb82-416e-9d36-2fc15dfac67a	YES	Normal	Not Available	Not Available	Not Available	-29403	2821	0	2821	2821																									NOT HISPANIC OR LATINO
TCGA-AD-5900	370	Alive	T2	N0	MX	Stage I				67	Ascending Colon	TCGA-AD-5900	0f008098-d8aa-46dc-8445-cca59838c582	Not Available	Not Available	Not Available	NO	22	-24776	Not Applicable	0	2	Not Available																									NOT HISPANIC OR LATINO
TCGA-CA-6718	306	Dead	T3	N0	M0	Stage IIA				46	Ascending Colon	TCGA-CA-6718	df5ab6cc-6f68-4b6b-95e2-954c6b57ba9c	Not Available	Not Available	Not Available	Not Available	8	-17109	Not Applicable	0	3	Not Available																									NOT HISPANIC OR LATINO
TCGA-D5-5538	1661	Dead	T3	N1b	M0	Stage IIIB				60	Cecum	TCGA-D5-5538	0dacc5ce-498f-4c60-9f78-7a013ffaa9ce	NO	Not Available	50	NO	16	-21974	Not Applicable	0	204	Not Available		TCGA-D5-5538-D13828	20ccac76-619d-4720-a197-8a648eb7ef26	Not Available	20	282	22	Calcium Foliatum, fluorouracilum, oxaliplatinum, dexamethassone	Not Available	6	12	Calcium Foliatum 708mg, fluorouracilum 3950mg, oxaliplatinum 150,45mg, dexamethassone 8mg	mg	ADJUVANT	Not Applicable	FOL FOX4	IV	NO	Chemotherapy	Not Available	Not Available	mg	Not Available	2011	NOT HISPANIC OR LATINO
TCGA-AA-3970	1096	Alive	T3	N0	M0	Stage IIA				65	Sigmoid Colon	TCGA-AA-3970	733d8b6a-ca9d-4a69-8c9c-1f88733e8b68	NO	Not Available	Not Available	Not Available	18	-23741	Not Applicable	0	0	Not Available																									Not Available
TCGA-CM-6674	394	Alive	T3	N0	M0	Stage IIA				39	Hepatic Flexure	TCGA-CM-6674	55697871-b9aa-4acd-8dbe-dcd5391db8f0	NO	Not Available	Not Available	NO	Not Available	-14368	Not Applicable	0	150	Not Available																									NOT HISPANIC OR LATINO
TCGA-CK-6747	820	Alive	T3	N0	MX	Stage IIA				87	Cecum	TCGA-CK-6747	755d3bde-76c3-45c1-8427-8e4d5d686dc1	NO	Not Available	Not Available	NO	Not Available	-32052	Not Applicable	0	89	Not Available																									NOT HISPANIC OR LATINO
TCGA-CK-6748	61	Alive	T3	N1	M1	Stage IV				45	Sigmoid Colon	TCGA-CK-6748	8a84b03a-e37e-4827-98f0-4d480ec31037	NO	Not Available	26	NO	Not Available	-16529	Not Applicable	0	61	Not Available																									NOT HISPANIC OR LATINO
TCGA-G4-6304	1631	Alive	T4	N0	M0	Stage IIB				66	Transverse Colon	TCGA-G4-6304	567ddc8e-2b00-417d-a326-479cb02e08dd	NO	Not Available	Not Available	NO	2	-24172	Not Applicable	0	1631	Not Available		TCGA-G4-6304-D21873;TCGA-G4-6304-D21877;TCGA-G4-6304-D21879	dd809433-8215-46dc-84c1-61087ef5c99b;3ebc93a4-f712-4cce-bf92-ac8e144d6365;acd0a481-2c9c-4f44-8241-5c356396a8e8	Not Available;Not Available;Not Available	6;6;6	258;258;258	46;46;46	Fluorouracil;Oxaliplatin;Leucovorin	Not Available;Not Available;Not Available	2;2;2	Not Available;Not Available;Not Available	Not Available;Not Available;Not Available	Not Available;Not Available;Not Available	ADJUVANT;ADJUVANT;ADJUVANT	Not Applicable;Not Applicable;Not Applicable	1;1;1	Not Available;Not Available;Not Available	NO;NO;NO	Chemotherapy;Chemotherapy;Chemotherapy	Not Available;Not Available;Not Available	Not Available;Not Available;Not Available	Not Available;Not Available;Not Available	Not Available;Not Available;Not Available	2012;2012;2012	NOT HISPANIC OR LATINO
TCGA-AA-A01R	1065	Alive	T3	N2	M0	Stage III				47	Ascending Colon	TCGA-AA-A01R	97f6c8d3-09a0-4128-8f10-41e736648a5f	NO	Not Available	Not Available	Not Available	15	-17289	Not Applicable	0	29	Not Available		TCGA-AA-A01R-D37394;TCGA-AA-A01R-D37395;TCGA-AA-A01R-D37396	D951161C-677D-4A62-9684-DD8794840413;EF93527A-31EB-43F2-98FB-343C3AE08F54;8EF3060A-3D3D-4F10-83A7-29CB9FDF2D8A	Not Available;Not Available;Not Available	3;3;3	820;820;820	60;669;669	5-Fluorouracil;Folinic acid;Irinotecan	Partial Response;Partial Response;Partial Response	12;12;12	Not Available;Not Available;Not Available	Not Available;Not Available;Not Available	Not Available;Not Available;Not Available	Not Available;Not Available;Not Available	Not Applicable;Not Applicable;Not Applicable	Not Available;Not Available;Not Available	Not Available;Not Available;Not Available	NO;NO;NO	Chemotherapy;Chemotherapy;Chemotherapy	Not Available;Not Available;Not Available	Not Available;Not Available;Not Available	Not Available;Not Available;Not Available	NO;NO;NO	2012;2012;2012	Not Available
TCGA-AA-3685	1127	Alive	T3	N0	M0	Stage II				69	Sigmoid Colon	TCGA-AA-3685	dca004bf-9c14-45a1-b186-ab3759f6c7fe	NO	Not Available	Not Available	Not Available	18	-25506	Not Applicable	0	31	Not Available																									Not Available
TCGA-A6-2670	775	Alive	T3	N0	M0	Stage IIA				45	Sigmoid Colon	TCGA-A6-2670	65bb7520-f055-43a8-b735-1152fa2c9e04	NO	Not Available	Not Available	NO	14	-16512	Not Applicable	0	424	424																									NOT HISPANIC OR LATINO
TCGA-AY-4071	29	Dead	T1	N0		Stage I				63	Not Available	TCGA-AY-4071	315ef7f6-ca21-4d87-8f19-40bd455885ec	NO	Not Available	Not Available	YES	7	-23320	29	0	Not Available	Not Available																									NOT HISPANIC OR LATINO
TCGA-AY-6196	6	Alive	T3	N2b		Stage IIIC				47	Cecum	TCGA-AY-6196	2c30dc20-18a8-44f9-ab10-558c1e5634dc	NO	Not Available	Not Available	NO	14	-17311	Not Applicable	0	6	Not Available																									NOT HISPANIC OR LATINO
TCGA-AZ-4682	680	Dead	T3	N0	M1	Stage IVA				61	Sigmoid Colon	TCGA-AZ-4682	e588714a-7753-4c3c-abb6-eaf1aab53ab3	Not Available	Not Available	Not Available	Not Available	23	-22409	680	0	Not Available	Not Available		TCGA-AZ-4682-D30816;TCGA-AZ-4682-D31200;TCGA-AZ-4682-D31202;TCGA-AZ-4682-D31203	4f6af62d-0d2a-4536-9c92-c4fc73ff58d5;4198e4c8-9a65-40d9-9a74-0e231eb35917;c8a170f2-d094-44f4-a6a1-e2b2b06f7ae6;5e969a71-8847-4099-91f4-03911df0d7ab	Not Available;Not Available;Not Available;Not Available	17;25;25;25	Not Available;Not Available;Not Available;Not Available	103;100;100;100	Avastin;Camptosar;Folinic acid;5-FU	Unknown;Clinical Progressive Disease;Clinical Progressive Disease;Clinical Progressive Disease	4;4;4;4	Not Available;Not Available;Not Available;Not Available	Not Available;Not Available;Not Available;Not Available	Not Available;Not Available;Not Available;Not Available	Not Available;Not Available;Not Available;Not Available	Not Applicable;Not Applicable;Not Applicable;Not Applicable	Not Available;Not Available;Not Available;Not Available	Not Available;Not Available;Not Available;Not Available	NO;NO;NO;NO	Chemotherapy;Chemotherapy;Chemotherapy;Chemotherapy	Not Available;Not Available;Not Available;Not Available	Not Available;Not Available;Not Available;Not Available	Not Available;Not Available;Not Available;Not Available	NO;NO;NO;NO	2012;2012;2012;2012	NOT HISPANIC OR LATINO
TCGA-AA-A00Q	1278	Alive	T4	N1	M0	Stage IIIB				66	Sigmoid Colon	TCGA-AA-A00Q	62d39be5-f029-4eb8-8b00-46470e06a755	NO	Not Available	Not Available	Not Available	15	-24199	Not Applicable	0	0	Not Available		TCGA-AA-A00Q-D37413;TCGA-AA-A00Q-D37414;TCGA-AA-A00Q-D37415	14525E0B-771C-4858-85EA-04411066C462;551F6AA8-2C03-4ACC-9760-585B262DAC5F;2FFB89A0-6358-4261-AD46-64CC67C11629	Not Available;Not Available;Not Available	3;3;3	334;334;334	61;61;61	Folinic acid;5-Fluorouracil;Oxaliplatin	Complete Response;Complete Response;Complete Response	12;12;12	Not Available;Not Available;Not Available	Not Available;Not Available;Not Available	Not Available;Not Available;Not Available	Not Available;Not Available;Not Available	Not Applicable;Not Applicable;Not Applicable	Not Available;Not Available;Not Available	Not Available;Not Available;Not Available	NO;NO;NO	Chemotherapy;Chemotherapy;Chemotherapy	Not Available;Not Available;Not Available	Not Available;Not Available;Not Available	Not Available;Not Available;Not Available	NO;NO;NO	2012;2012;2012	Not Available
TCGA-AA-3715	579	Dead	T3	N0	M0	Stage II				77	Ascending Colon	TCGA-AA-3715	e394e9ec-7288-4ede-9ef8-41b631d100dd	NO	Not Available	Not Available	Not Available	18	-28428	Not Applicable	0	30	Not Available																									Not Available
TCGA-A6-2684	1127	Alive	T2	N0	M0	Stage I		FPPP	TCGA	75	Cecum	TCGA-A6-2684	49929108-023e-4d35-b26d-50ab4d3ae581	NO	Not Available	Not Available	NO	24	-27708	Not Applicable	0	387	Not Available																									NOT HISPANIC OR LATINO
TCGA-F4-6807	1309	Alive	T3	N2b	M0	Stage IIIC				51	Hepatic Flexure	TCGA-F4-6807	9382987c-b5b3-48fe-8194-4d83fe340cd0	NO	Not Available	Not Available	NO	25	-18690	Not Applicable	0	16	Not Available		TCGA-F4-6807-D35070	7599BE98-8FE6-4E14-A6BF-8F31624CF90F	Not Available	14	284	73	Xeloda	Complete Response	9	Not Available	Not Available	Not Available	Not Available	Not Applicable	Not Available	Not Available	NO	Chemotherapy	Not Available	Not Available	Not Available	YES	2012	NOT HISPANIC OR LATINO
TCGA-AA-3514	31	Alive	T2	N0	M0	Stage I				81	Ascending Colon	TCGA-AA-3514	ddf69ed9-4c53-48b8-9f01-495bd60c3425	NO	Not Available	Not Available	Not Available	18	-29738	Not Applicable	0	0	Not Available																									Not Available
TCGA-QG-A5YW	896	Alive	T3	N2b	MX	Stage IIIC				55	Cecum	TCGA-QG-A5YW	9F45A227-1FD5-478C-A194-4A5C61B68CC3	NO	Not Available	165	NO	20	-20391	Not Applicable	0	399	Not Available		TCGA-QG-A5YW-D44480;TCGA-QG-A5YW-D48503	0D4D2171-F422-48BB-B6AF-7B11900BA704;8B2088DB-6AF0-441E-A2FF-1AD44019549B	Not Available;Not Available	20;16	197;197	42;42	capecitabine;oxaliplatin	Complete Response;Complete Response	6;9	Not Available;Not Available	Not Available;Not Available	Not Available;Not Available	Not Available;Not Available	Not Applicable;Not Applicable	Not Available;Not Available	Not Available;Not Available	NO;NO	Chemotherapy;Chemotherapy	Not Available;Not Available	Not Available;Not Available	Not Available;Not Available	NO;NO	2013;2013	NOT HISPANIC OR LATINO
TCGA-F4-6806	1260	Alive	T2	N0	M0	Stage I				59	Sigmoid Colon	TCGA-F4-6806	bab21810-f51b-421e-a87f-1f1136cbc77a	NO	Not Available	Not Available	NO	31	-21625	Not Applicable	0	20	Not Available		TCGA-F4-6806-D35434;TCGA-F4-6806-D35435;TCGA-F4-6806-D35436;TCGA-F4-6806-D35438;TCGA-F4-6806-D35439;TCGA-F4-6806-D35440;TCGA-F4-6806-D35441;TCGA-F4-6806-D55585;TCGA-F4-6806-D55586;TCGA-F4-6806-D55587;TCGA-F4-6806-D55588;TCGA-F4-6806-D55589;TCGA-F4-6806-D65811;TCGA-F4-6806-D65812;TCGA-F4-6806-D65813	21322B68-CA4A-4EBD-B6C2-2DE312E8C191;CE89B929-B40D-4B1D-8F2A-17FA387A40C0;C8070FFD-ED9D-4F92-8CC9-CDA03C1EF7FF;DB534232-0D51-49A2-8358-24D5BBA3A286;3CC4372C-CC95-4B06-B228-9917C5A2C310;270B1EAE-76FD-4BA8-82A9-61109D1AC48E;039AEB96-42C2-4F56-B70A-9C5F9D2CA39F;2843DF68-7A05-4F45-A0BD-415396178241;4A462DE8-23F3-43E1-B382-753F79648D56;8FBAFE5C-1DDC-4C8A-B9B1-1EE6000053B5;0457213A-4DDB-44D8-BAC8-B2125…	Not Available;Not Available;Not Available;Not Available;Not Available;Not Available;Not Available;Not Available;Not Available;Not Available;Not Available;Not Available;Not Available;Not Available;Not Available	27;27;27;27;27;27;27;9;9;9;9;9;30;30;30	158;158;158;263;263;412;412;760;760;760;760;883;Not Available;Not Available;Not Available	42;42;42;173;173;361;361;641;641;641;641;760;1161;1161;1161	Irinotecan;Leucovorin;5-Fluorouracil;Mitomycin;Capecitabine;Oxaliplatin;Capecitabine;Oxaliplatin;Leucovorin;Camptosar;5-Fluorouracil;Avastin;Oxaliplatin;Capecitabine;Bevacizumab	Complete Response;Complete Response;Complete Response;Complete Response;Complete Response;Complete Response;Complete Response;Partial Response;Partial Response;Partial Response;Partial Response;Partial Response;Not Applicable;Not Applicable;Not Applicable	9;9;9;9;9;9;9;1;1;1;1;1;9;9;9	Not Available;Not Available;Not Available;Not Available;Not Available;Not Available;Not Available;Not Available;Not Available;Not Available;Not Available;Not Available;Not Available;Not Available;Not Available	Not Available;Not Available;Not Available;Not Available;Not Available;Not Available;Not Available;Not Available;Not Available;Not Available;Not Available;Not Available;Not Available;Not Available;Not Available	Not Available;Not Available;Not Available;Not Available;Not Available;Not Available;Not Available;Not Available;Not Available;Not Available;Not Available;Not Available;Not Available;Not Available;Not Available	Not Available;Not Available;Not Available;Not Available;Not Available;Not Available;Not Available;Not Available;Not Available;Not Available;Not Available;Not Available;Not Available;Not Available;Not Available	Not Applicable;Not Applicable;Not Applicable;Not Applicable;Not Applicable;Not Applicable;Not Applicable;Not Applicable;Not Applicable;Not Applicable;Not Applicable;Not Applicable;Not Applicable;Not Applicable;Not Applicable	Not Available;Not Available;Not Available;Not Available;Not Available;Not Available;Not Available;Not Available;Not Available;Not Available;Not Available;Not Available;Not Available;Not Available;Not Available	Not Available;Not Available;Not Available;Not Available;Not Available;Not Available;Not Available;Not Available;Not Available;Not Available;Not Available;Not Available;Not Available;Not Available;Not Available	NO;NO;NO;NO;NO;NO;NO;NO;NO;NO;NO;NO;YES;YES;YES	Chemotherapy;Ancillary;Chemotherapy;Chemotherapy;Chemotherapy;Chemotherapy;Chemotherapy;Chemotherapy;Ancillary;Chemotherapy;Chemotherapy;Chemotherapy;Chemotherapy;Chemotherapy;Targeted Molecular therapy	Not Available;Not Available;Not Available;Not Available;Not Available;Not Available;Not Available;Not Available;Not Available;Not Available;Not Available;Not Available;Not Available;Not Available;Not Available	Not Available;Not Available;Not Available;Not Available;Not Available;Not Available;Not Available;Not Available;Not Available;Not Available;Not Available;Not Available;Not Available;Not Available;Not Available	Not Available;Not Available;Not Available;Not Available;Not Available;Not Available;Not Available;Not Available;Not Available;Not Available;Not Available;Not Available;Not Available;Not Available;Not Available	NO;NO;NO;NO;NO;NO;NO;NO;NO;NO;NO;NO;NO;NO;NO	2012;2012;2012;2012;2012;2012;2012;2014;2014;2014;2014;2014;2014;2014;2014	NOT HISPANIC OR LATINO
TCGA-DM-A28C	2475	Dead	T3	N0	M0	Stage IIA				74	Sigmoid Colon	TCGA-DM-A28C	F83B909C-DA90-41ED-B532-A2EF9371CFF9	NO	Not Available	Not Available	YES	27	-27073	2475	0	2475	Not Available																									NOT HISPANIC OR LATINO
TCGA-A6-4105	442	Dead	T3	N0	M0	Stage IIA				79	Ascending Colon	TCGA-A6-4105	95d4f0c4-5997-4ffb-b876-0ddfeee972bb	NO	Not Available	Not Available	YES	24	-29097	442	0	Not Available	Not Available																									NOT HISPANIC OR LATINO
TCGA-AA-3562	608	Alive	T3	N2	M0	Stage IIIC				82	Descending Colon	TCGA-AA-3562	127f738d-afa1-42f6-a9a0-f33806667b84	NO	Not Available	Not Available	Not Available	18	-30254	Not Applicable	0	31	Not Available		TCGA-AA-3562-D37469;TCGA-AA-3562-D37470;TCGA-AA-3562-D37471	2E29FE7B-26FB-403C-A4E4-94AF2131E766;72A86237-359D-4847-82EA-73CC155CEE90;F7B983DE-0C58-48A5-A415-655D45D9C330	Not Available;Not Available;Not Available	3;3;3	243;243;182	62;62;62	Folinic acid;5-Fluorouracil;Oxaliplatin	Complete Response;Complete Response;Complete Response	12;12;12	Not Available;Not Available;Not Available	Not Available;Not Available;Not Available	Not Available;Not Available;Not Available	Not Available;Not Available;Not Available	Not Applicable;Not Applicable;Not Applicable	Not Available;Not Available;Not Available	Not Available;Not Available;Not Available	NO;NO;NO	Chemotherapy;Chemotherapy;Chemotherapy	Not Available;Not Available;Not Available	Not Available;Not Available;Not Available	Not Available;Not Available;Not Available	NO;NO;NO	2012;2012;2012	Not Available
TCGA-A6-3809	996	Alive	T4	N0	M0	Stage IIB		FPPP	TCGA	71	Transverse Colon	TCGA-A6-3809	8632579e-d318-4dab-9994-d3945afc42ab	NO	Not Available	Not Available	YES	29	-26274	Not Applicable	0	314	Not Available																									NOT HISPANIC OR LATINO
TCGA-CK-4947	534	Alive	T4	N1	M0	Stage IIIB				46	Sigmoid Colon	TCGA-CK-4947	73f9681a-f9ef-4880-bd16-93624fd117c6	NO	Not Available	Not Available	NO	31	-16980	Not Applicable	0	534	Not Available		TCGA-CK-4947-D9803;TCGA-CK-4947-D14537;TCGA-CK-4947-D14535	3ebddb06-e6bd-46ca-ac04-5ad4941844f6;51ec77f6-eaf7-41d2-8888-10797b91ff48;74525cbb-3c61-46d2-a8ee-503e66ff4ad3	Not Available;Not Available;Not Available	31;2;2	448;448;448	448;448;448	Folinic Acid;Fluorouracil;Oxaliplatin	Not Available;Not Available;Not Available	3;8;8	1;1;1	200;600;85	mg/kg;mg/m2;mg/m2	RECURRENCE;PALLIATIVE;PALLIATIVE	Not Applicable;Not Applicable;Not Applicable	Not Available;Not Available;Not Available	IV;IV;IV	NO;NO;NO	Other, specify in notes;Chemotherapy;Chemotherapy	Not Available;Not Available;Not Available	Not Available;Not Available;Not Available	mg/m2;Not Available;Not Available	Not Available;Not Available;Not Available	2011;2011;2011	NOT HISPANIC OR LATINO
TCGA-G4-6588	796	Alive	T3	N0	M0	Stage IIA				58	Cecum	TCGA-G4-6588	93690a96-421c-4c59-85ba-fa6dd538c721	NO	Not Available	Not Available	NO	11	-21532	Not Applicable	0	644	Not Available																									NOT HISPANIC OR LATINO
TCGA-AA-A00U	518	Alive	T3	N1	M0	Stage IIIB				50	Ascending Colon	TCGA-AA-A00U	091e3084-04ee-4497-893c-d46226dec78f	NO	Not Available	Not Available	Not Available	15	-18263	Not Applicable	0	31	Not Available		TCGA-AA-A00U-D37380;TCGA-AA-A00U-D37381;TCGA-AA-A00U-D37382	573E799A-7A71-49F9-A262-26BF0DCB98ED;DD9FE9D1-175B-495F-9E2D-9DF63C15AD70;EA070337-0D97-467F-B588-9F256BE4C9F4	Not Available;Not Available;Not Available	3;3;3	214;214;214	61;61;61	Folinic acid;5-Fluorouracil;Oxaliplatin	Complete Response;Complete Response;Complete Response	12;12;12	Not Available;Not Available;Not Available	Not Available;Not Available;Not Available	Not Available;Not Available;Not Available	Not Available;Not Available;Not Available	Not Applicable;Not Applicable;Not Applicable	Not Available;Not Available;Not Available	Not Available;Not Available;Not Available	NO;NO;NO	Chemotherapy;Chemotherapy;Chemotherapy	Not Available;Not Available;Not Available	Not Available;Not Available;Not Available	Not Available;Not Available;Not Available	NO;NO;NO	2012;2012;2012	Not Available
TCGA-AA-3864	1612	Alive	T3	N0	M0	Stage II				71	Cecum	TCGA-AA-3864	c82bbe23-0264-45a7-b1a6-82b4654108c8	NO	Not Available	Not Available	Not Available	18	-26237	Not Applicable	0	0	Not Available																									Not Available
TCGA-AY-4070	496	Dead	T3	N2	M0	Stage IIIC				50	Cecum	TCGA-AY-4070	6baf61b6-ae5b-42f0-adc9-0d26fda231f7	NO	Not Available	Not Available	NO	18	-18621	496	0	Not Available	Not Available		TCGA-AY-4070-D3537;TCGA-AY-4070-D3554;TCGA-AY-4070-D20685;TCGA-AY-4070-D20674	68a125c7-6377-4105-866f-eef2a90ed085;86b293fc-06bc-4c36-956a-a2b8525fd5da;2a9501ce-b4e0-48b7-bcc1-39ccd2b189df;5be9b21f-28da-47a0-8c21-25f848f38f4f	Not Available;Not Available;Not Available;Not Available	18;18;19;19	146;239;239;146	64;212;212;64	5FU;XELODA;Irinotecan;Oxaliplatin	Not Available;Not Available;Not Available;Not Available	11;11;1;1	7;3;3;7	Not Available;Not Available;Not Available;Not Available	mg/m2;mg/m2;mg/m2;mg/m2	ADJUVANT;PROGRESSION;PROGRESSION;ADJUVANT	Not Applicable;Not Applicable;Not Applicable;Not Applicable	1;2;2;1	IV;PO;IV;IV	NO;NO;NO;NO	Chemotherapy;Chemotherapy;Chemotherapy;Chemotherapy	Not Available;Not Available;Not Available;Not Available	Not Available;Not Available;Not Available;Not Available	Not Available;Not Available;Not Available;Not Available	Not Available;Not Available;Not Available;Not Available	2010;2010;2012;2012	NOT HISPANIC OR LATINO
TCGA-AA-A02R	670	Dead	T3	N0	M0	Stage IIA				84	Cecum	TCGA-AA-A02R	764c97c9-01d3-45cb-86bd-f8a52b5468da	NO	Not Available	Not Available	Not Available	15	-30834	670	0	Not Available	Not Available																									Not Available
[truncated: 117 more columns]
