# Supplementary material for: Molecular subtypes based on DNA methylation predict prognosis in colon adenocarcinoma patients
Source: Aging (Albany NY). 2019 Dec 18;11(24):11880–92. doi: 10.18632/aging.102492 (PMC6949097; doi:10.18632/aging.102492)
Supplement: Supplementary Table 2 [file aging-11-102492-s011..xlsx]

## Sheet: Supplementary Table 3
	TCGA-A6-5666-01	TCGA-A6-5664-01	TCGA-NH-A6GB-01	TCGA-CM-6677-01	TCGA-D5-5539-01	TCGA-CK-5913-01	TCGA-CM-5349-01	TCGA-CM-6172-01	TCGA-D5-6920-01	TCGA-AZ-6606-01	TCGA-CM-6163-01	TCGA-AZ-4323-01	TCGA-AZ-6598-01	TCGA-A6-5662-01	TCGA-DM-A0X9-01	TCGA-AA-3510-01	TCGA-AZ-4308-01	TCGA-CK-5914-01	TCGA-AA-3506-01	TCGA-CA-5255-01	TCGA-AD-6964-01	TCGA-CM-5864-01	TCGA-G4-6320-01	TCGA-AD-6890-01	TCGA-G4-6317-01	TCGA-D5-7000-01	TCGA-CM-4744-01	TCGA-F4-6704-01	TCGA-DM-A1DB-01	TCGA-NH-A6GC-01	TCGA-CK-4952-01	TCGA-G4-6297-01	TCGA-G4-6302-01	TCGA-CM-4750-01	TCGA-CK-5916-01	TCGA-CM-6168-01	TCGA-AZ-6603-01	TCGA-D5-6922-01	TCGA-AD-6548-01	TCGA-CM-5341-01	TCGA-CK-5915-01	TCGA-AA-3489-01	TCGA-A6-2680-01	TCGA-CM-4746-01	TCGA-CM-5344-01	TCGA-G4-6321-01	TCGA-A6-6650-01	TCGA-G4-6303-01	TCGA-F4-6854-01
cg00000292	0.509622	0.703832	0.691782	0.752852	0.384556	0.603451	0.776602	0.715882	0.729687	0.732378	0.577011	0.591284	0.838609	0.787131	0.719977	0.753086	0.515238	0.81638	0.608248	0.708395	0.737175	0.757064	0.516174	0.566598	0.861773	0.792162	0.752501	0.65528	0.884704	0.762095	0.915356	0.528458	0.698801	0.757064	0.630828	0.746418	0.477917	0.418133	0.796257	0.77941	0.880375	0.642995	0.424685	0.595028	0.627786	0.687336	0.832798	0.714829	0.726529
cg00002426	0.264405	0.430264	0.292912	0.395109	0.304067	0.287166	0.335053	0.564123	0.28187	0.194884	0.327616	0.588461	0.216518	0.846039	0.179222	0.289419	0.204349	0.211786	0.238377	0.397926	0.81156	0.190264	0.581363	0.253814	0.165926	0.254264	0.303053	0.29449	0.146884	0.390828	0.168969	0.474095	0.537194	0.761306	0.839954	0.452912	0.194884	0.207166	0.409081	0.279166	0.061363	0.559053	0.165701	0.1488	0.375616	0.332123	0.158565	0.526152	0.274997
cg00003994	0.79522	0.0593804	0.124984	0.346371	0.0256443	0.284319	0.173298	0.0614363	0.407021	0.752512	0.278992	0.114517	0.722608	0.428421	0.54561	0.213856	0.0408769	0.568973	0.0209717	0.172924	0.0505025	0.261703	0.789893	0.0561096	0.027233	0.0431198	0.0227473	0.109657	0.188718	0.0234949	0.674106	0.0461102	0.0341484	0.138627	0.551591	0.0326532	0.166102	0.0363912	0.0505959	0.550469	0.847459	0.229369	0.0245229	0.0341484	0.0227473	0.420385	0.218653	0.0704077	0.0546143
cg00005847	0.844903	0.734604	0.53354	0.770061	0.712523	0.761356	0.769318	0.854033	0.811145	0.853184	0.669954	0.489697	0.855413	0.928132	0.855731	0.732163	0.721865	0.833226	0.868577	0.740125	0.726536	0.84777	0.874097	0.823247	0.795221	0.790019	0.709126	0.759446	0.840445	0.897239	0.862844	0.493306	0.646493	0.79883	0.694689	0.610717	0.796389	0.750847	0.809977	0.731207	0.857642	0.54957	0.879617	0.83726	0.700528	0.665814	0.874592	0.751696	0.801697
cg00007981	0.0560878	0.0285221	0.0183074	0.0328598	0.0272627	0.026703	0.0283822	0.0318804	0.0293617	0.0356584	0.0215257	0.0225052	0.0219455	0.0257235	0.0216656	0.024884	0.0321602	0.0230649	0.0236246	0.0334196	0.0318804	0.0523098	0.0216656	0.0276825	0.0307609	0.0329998	0.0471325	0.0289419	0.0194268	0.0237645	0.0265631	0.0230649	0.0213858	0.0240444	0.030621	0.020966	0.0225052	0.0353785	0.0401361	0.020966	0.0348188	0.0292217	0.0227851	0.03258	0.0173279	0.0244642	0.0408824	0.0296415	0.0281023
cg00008493	0.949207	0.964981	0.956037	0.963354	0.964818	0.964981	0.970184	0.951727	0.951077	0.965712	0.970997	0.973111	0.935141	0.951727	0.96929	0.958395	0.962379	0.966282	0.961891	0.963598	0.948719	0.957338	0.969453	0.956362	0.959777	0.959696	0.959452	0.9575	0.963517	0.955224	0.949288	0.971892	0.962623	0.956687	0.962297	0.969534	0.961078	0.939043	0.967582	0.941239	0.964981	0.96555	0.96368	0.916277	0.962297	0.959126	0.940073	0.959777	0.941483
cg00008713	0.0352263	0.0348056	0.0425469	0.0536541	0.0369092	0.0321129	0.0366568	0.0497834	0.0468384	0.0442298	0.0296727	0.047764	0.034469	0.0409482	0.0348056	0.0319446	0.0318605	0.0475957	0.041453	0.048942	0.0359836	0.0372458	0.0448189	0.0353946	0.0498676	0.0313556	0.034469	0.0464176	0.0354787	0.0274008	0.0392653	0.0369933	0.0381714	0.0420421	0.0366568	0.0417896	0.0343848	0.0499517	0.0561785	0.0398543	0.0526444	0.0453237	0.0276532	0.0512139	0.0421262	0.052392	0.0350299	0.0226886	0.0358994
cg00009407	0.0352166	0.0265254	0.0251047	0.0288653	0.029701	0.0294503	0.0246032	0.0363866	0.029116	0.0376402	0.0210097	0.0318738	0.0249375	0.0276953	0.040398	0.0271103	0.0257732	0.0293667	0.0291996	0.0284475	0.0294503	0.0361359	0.0233497	0.0299517	0.0334617	0.0266089	0.0226811	0.0274446	0.0265254	0.0210933	0.0189205	0.0240183	0.0222633	0.032626	0.0258568	0.0249375	0.024269	0.031456	0.038058	0.032041	0.0352166	0.0349659	0.0247704	0.0277789	0.021929	0.0246032	0.0231268	0.0241018	0.0228483
cg00011459	0.898885	0.956503	0.958872	0.960957	0.919923	0.933001	0.948638	0.959062	0.942857	0.963042	0.934423	0.870266	0.951196	0.90495	0.927978	0.945605	0.931201	0.971097	0.932148	0.933191	0.942478	0.945605	0.949301	0.921629	0.942857	0.94352	0.93556	0.941151	0.946174	0.928168	0.950438	0.944657	0.957167	0.93954	0.920966	0.951481	0.951765	0.926178	0.965316	0.942952	0.939824	0.902202	0.926841	0.936128	0.948164	0.947121	0.946774	0.958114	0.955745
cg00012199	0.0392004	0.0302885	0.021187	0.0399589	0.0312366	0.0298145	0.0252638	0.0213767	0.0275391	0.0293405	0.0269703	0.0383471	0.0347445	0.0367354	0.0216611	0.0264014	0.0230832	0.0337016	0.0216611	0.022704	0.0319003	0.0292457	0.0287716	0.0293405	0.0283924	0.0319003	0.0227988	0.035977	0.0203338	0.0257378	0.0348393	0.0277287	0.0306678	0.0282976	0.0204286	0.0239365	0.0323743	0.0276339	0.0414758	0.0238416	0.0260222	0.031047	0.0244105	0.0267807	0.0203338	0.0288664	0.036451	0.0340808	0.0265911
cg00012386	0.0175263	0.0408765	0.0385856	0.0448416	0.0314483	0.0456347	0.0301266	0.022725	0.0470445	0.035854	0.031184	0.041229	0.0285406	0.0338274	0.0258972	0.0317127	0.0351491	0.0289811	0.0431675	0.0246636	0.041229	0.038938	0.0418458	0.0238705	0.0259853	0.0248398	0.0184075	0.0533006	0.0315364	0.018848	0.0331225	0.0367352	0.0252804	0.0359421	0.037352	0.038938	0.0344442	0.0380569	0.0399954	0.0464277	0.0401716	0.0426388	0.0332987	0.0446654	0.0326819	0.0405241	0.032447	0.0281	0.0496879
cg00012792	0.0907912	0.068733	0.0469227	0.0668329	0.0465096	0.053284	0.0549363	0.0574974	0.0626195	0.0945089	0.0602237	0.0639414	0.0516317	0.0465922	0.0540276	0.0595628	0.0580757	0.0570017	0.0594802	0.0593149	0.0551842	0.067659	0.0435355	0.064437	0.0500621	0.0568365	0.0589019	0.061876	0.054358	0.0560103	0.0581583	0.0501447	0.0745161	0.064024	0.0648501	0.0493185	0.0536971	0.066172	0.0795556	0.058654	0.0566713	0.0514665	0.0589019	0.0527057	0.0500621	0.0600585	0.0595903	0.0345305	0.0659241
cg00013618	0.641726	0.797492	0.39723	0.473048	0.56219	0.378741	0.879714	0.895208	0.720022	0.770016	0.815155	0.75948	0.711449	0.918552	0.584811	0.436068	0.371923	0.629124	0.498768	0.848416	0.494326	0.462098	0.518187	0.572209	0.809578	0.501453	0.328024	0.640073	0.88839	0.483377	0.13125	0.696678	0.792947	0.497218	0.646064	0.644515	0.325441	0.495979	0.528619	0.819287	0.694819	0.671887	0.462925	0.447224	0.714134	0.524384	0.452595	0.550724	0.482241
cg00014085	0.0174866	0.034619	0.0285238	0.0821448	0.0382431	0.0296769	0.0139448	0.0396434	0.0288533	0.0293475	0.0197105	0.0276177	0.0217697	0.0304182	0.0463151	0.0288533	0.0275354	0.0367605	0.0276177	0.0239112	0.0347013	0.040467	0.027453	0.0642712	0.0629533	0.0315714	0.0389021	0.035525	0.0161687	0.0294298	0.0582584	0.029018	0.0207813	0.0289356	0.0281943	0.0239112	0.0337953	0.022511	0.0328893	0.0207813	0.036431	0.0319008	0.0327245	0.0300064	0.0273706	0.0286062	0.0355799	0.0215226	0.0284414
cg00015770	0.770995	0.501698	0.588153	0.736943	0.59818	0.429337	0.576329	0.750848	0.593545	0.802967	0.717174	0.234387	0.824817	0.894151	0.783576	0.696553	0.75501	0.846289	0.624381	0.183782	0.168458	0.858302	0.662595	0.393582	0.633178	0.540385	0.729376	0.706485	0.171769	0.764942	0.798616	0.726727	0.440215	0.73193	0.665149	0.549088	0.196457	0.694188	0.665717	0.684067	0.696932	0.530548	0.701756	0.66496	0.49432	0.598085	0.844965	0.520332	0.662406
cg00016968	0.235258	0.465507	0.362957	0.433705	0.383212	0.374014	0.466877	0.335264	0.409926	0.306789	0.491732	0.678925	0.322445	0.353954	0.47588	0.35141	0.324794	0.353269	0.359238	0.500147	0.459929	0.425779	0.338102	0.396716	0.269605	0.345735	0.366088	0.46766	0.374699	0.323326	0.254535	0.51414	0.554652	0.346615	0.48087	0.52735	0.319999	0.329784	0.452688	0.423332	0.504257	0.638121	0.30992	0.309529	0.415406	0.419712	0.270387	0.372253	0.399358
cg00019495	0.034428	0.16632	0.168293	0.160872	0.133723	0.130341	0.103005	0.113902	0.0773588	0.0870347	0.0999984	0.172708	0.0311401	0.0557525	0.0629859	0.106199	0.0917317	0.227851	0.0386553	0.118599	0.0845922	0.0816801	0.0320795	0.10075	0.0717224	0.0686223	0.0773588	0.246076	0.070783	0.0372462	0.0321734	0.136635	0.1961	0.0875983	0.136635	0.133253	0.141708	0.0768891	0.125738	0.158899	0.039125	0.168951	0.0500221	0.0603556	0.111177	0.0970863	0.0402836	0.116814	0.137293
cg00020533	0.872976	0.938417	0.704129	0.939316	0.950306	0.651176	0.949807	0.92443	0.918934	0.960397	0.951105	0.928126	0.938417	0.941214	0.947109	0.940515	0.933321	0.966591	0.761377	0.933222	0.911441	0.933721	0.925529	0.928226	0.94611	0.929525	0.881468	0.911241	0.948608	0.926528	0.83531	0.934321	0.933122	0.92433	0.874275	0.943512	0.926128	0.915837	0.940315	0.927727	0.946609	0.926528	0.936619	0.927227	0.938617	0.923231	0.774065	0.948308	0.927727
cg00021527	0.0166025	0.0394618	0.0819632	0.03108	0.0306567	0.0351439	0.0181264	0.0430177	0.0437797	0.0314187	0.0448803	0.0359906	0.0193117	0.0286248	0.0173644	0.0294714	0.0286248	0.0361599	0.0366679	0.0384458	0.0499602	0.0289634	0.0283708	0.0734122	0.0259155	0.0411551	0.0150785	0.0347206	0.033874	0.0242222	0.019735	0.0320113	0.03362	0.0186344	0.0366679	0.0325193	0.0320113	0.0389538	0.0433564	0.0221903	0.0288788	0.0397158	0.0200737	0.0276935	0.0254075	0.0242222	0.052105	0.0223596	0.0411551
cg00022866	0.260855	0.476849	0.764703	0.671733	0.758567	0.758879	0.728513	0.255552	0.445963	0.859336	0.686292	0.627224	0.805884	0.926516	0.828346	0.305573	0.727993	0.840514	0.658941	0.729241	0.666117	0.838954	0.77687	0.330947	0.815347	0.792989	0.698043	0.786021	0.55838	0.793613	0.738288	0.763559	0.559836	0.780301	0.76751	0.637519	0.34769	0.6735	0.801724	0.776142	0.161438	0.332403	0.46593	0.760751	0.759919	0.52219	0.788448	0.795484	0.738288
cg00024396	0.0470852	0.306935	0.0604738	0.0623705	0.0476431	0.412258	0.2015	0.0400562	0.0610316	0.343642	0.0758706	0.0573498	0.71484	0.0630399	0.0643788	0.0544489	0.0600275	0.0551183	0.0358165	0.0446306	0.0758706	0.0329156	0.784683	0.0680606	0.070292	0.313852	0.0878087	0.101197	0.0224279	0.0302379	0.0335851	0.0478662	0.0280065	0.40813	0.0562341	0.0583539	0.0354818	0.10633	0.0571266	0.0505439	0.488684	0.0575729	0.0471968	0.0514365	0.0579076	0.338733	0.0412835	0.0436265	0.11916
cg00024812	0.0244258	0.0222778	0.0257146	0.0279486	0.0309558	0.0258005	0.0208171	0.0294092	0.0305262	0.0282923	0.0233088	0.0280345	0.0266598	0.0344786	0.0228792	0.0330179	0.026402	0.0215904	0.0262301	0.0297529	0.0276908	0.0227933	0.019786	0.0264879	0.0276049	0.0249413	0.0243399	0.0308699	0.0236525	0.0169506	0.023137	0.0308699	0.0221059	0.0393761	0.0248554	0.0191846	0.0226214	0.0261442	0.0279486	0.0264879	0.0306121	0.0254569	0.0259724	0.0225355	0.0213326	0.0238243	0.0262588	0.0184972	0.0245117
cg00025138	0.0240264	0.0150357	0.0173627	0.0175742	0.0151415	0.0178916	0.0165165	0.0160934	0.0233917	0.0191608	0.0147184	0.0178916	0.0140838	0.0172569	0.0156703	0.013026	0.0149299	0.0164107	0.0147184	0.0142953	0.0193724	0.0136607	0.0152472	0.0224398	0.0154588	0.0266707	0.0132376	0.0171512	0.0117568	0.013026	0.0146126	0.0173627	0.0128145	0.0219109	0.0142953	0.0145068	0.0158819	0.0201128	0.0188435	0.015353	0.0205359	0.0150357	0.0135549	0.0157761	0.0134491	0.0161992	0.0207474	0.0161992	0.0224398
cg00025991	0.677946	0.517283	0.525434	0.613327	0.698864	0.675098	0.714479	0.725674	0.616077	0.740896	0.670777	0.561671	0.661841	0.768197	0.705542	0.657814	0.548905	0.709077	0.525532	0.473679	0.500588	0.524255	0.608712	0.529853	0.75268	0.631986	0.531915	0.551949	0.454333	0.681678	0.70839	0.590249	0.55136	0.628647	0.653395	0.619121	0.364082	0.551163	0.382447	0.601444	0.766134	0.602426	0.599284	0.646128	0.621478	0.611363	0.606649	0.672741	0.651431
cg00027083	0.67524	0.119753	0.684274	0.569041	0.538225	0.645428	0.12969	0.238198	0.487836	0.579279	0.0568164	0.19353	0.648038	0.697323	0.629066	0.0936548	0.541236	0.162513	0.600559	0.564825	0.261786	0.108711	0.534511	0.107306	0.576268	0.589518	0.593131	0.561412	0.596243	0.12688	0.647737	0.0917476	0.378124	0.585503	0.571651	0.513432	0.526983	0.597448	0.531199	0.506205	0.75775	0.329641	0.566833	0.6913	0.51303	0.542943	0.63877	0.289591	0.548765
cg00029826	0.0706504	0.0732187	0.0778739	0.0621426	0.034051	0.0451271	0.0518691	0.0554006	0.08895	0.0746634	0.0470534	0.0712924	0.197785	0.0655136	0.0493007	0.0600558	0.0643899	0.0521902	0.0826896	0.064711	0.0605374	0.0430403	0.0544375	0.0749845	0.0537954	0.0634268	0.0659952	0.0436824	0.0423982	0.0414351	0.0552401	0.0868632	0.0724161	0.0786765	0.037422	0.0322852	0.0814054	0.117202	0.0844554	0.0443245	0.0472139	0.081566	0.0578085	0.0653531	0.0412746	0.0624637	0.10313	0.0550796	0.113029
cg00029931	0.0184436	0.0332715	0.184618	0.3557	0.0269313	0.401002	0.469721	0.22409	0.382697	0.0275448	0.0219205	0.029181	0.186458	0.0288742	0.339134	0.0322488	0.274403	0.0330669	0.0349076	0.0283629	0.0357257	0.0269313	0.0223295	0.033885	0.498866	0.330544	0.0462586	0.0308172	0.0180346	0.143611	0.42442	0.514409	0.372164	0.209569	0.456632	0.42984	0.306615	0.029181	0.27154	0.235135	0.0321466	0.0262154	0.29281	0.031533	0.304774	0.433214	0.460211	0.380754	0.157314
cg00030047	0.853553	0.422655	0.718267	0.828623	0.763584	0.80181	0.558716	0.802031	0.44138	0.661981	0.20715	0.553509	0.856766	0.918149	0.556722	0.470742	0.733114	0.225765	0.69655	0.328365	0.648464	0.863636	0.811782	0.132582	0.166155	0.697215	0.595169	0.749069	0.824967	0.865076	0.820092	0.488913	0.544866	0.168038	0.553619	0.588521	0.165157	0.1461	0.724139	0.462653	0.939422	0.317063	0.691232	0.752726	0.699985	0.646358	0.67199	0.840368	0.650236
cg00031162	0.383556	0.396761	0.311501	0.271262	0.320963	0.373471	0.429098	0.326577	0.297152	0.348828	0.434297	0.555117	0.492003	0.773883	0.226033	0.407471	0.321483	0.461538	0.243709	0.42182	0.488364	0.361825	0.456548	0.256498	0.6122	0.407991	0.266271	0.630084	0.350492	0.356211	0.282804	0.441471	0.375862	0.29684	0.664084	0.386156	0.233727	0.364321	0.459979	0.396761	0.281868	0.523716	0.2121	0.28769	0.343941	0.251091	0.299578	0.294969	0.454572
cg00032227	0.031467	0.0128039	0.0136561	0.0145083	0.0116961	0.0143379	0.0122926	0.0387958	0.0180023	0.0116109	0.0130596	0.0113552	0.0164684	0.0288252	0.0125483	0.0113552	0.0122074	0.014764	0.0110143	0.0134857	0.0157866	0.01323	0.0105882	0.0145083	0.0122926	0.0169797	0.0108439	0.0148492	0.0127187	0.0166388	0.0114404	0.0142527	0.0123778	0.0126335	0.0226042	0.0142527	0.0134005	0.013997	0.0135709	0.01323	0.013997	0.0129744	0.0116109	0.013997	0.0129744	0.0124631	0.0203885	0.0142527	0.0157866
cg00033516	0.0258102	0.0547221	0.0590117	0.0608991	0.0339604	0.0306145	0.0335314	0.0375637	0.0425396	0.0449418	0.0412527	0.142401	0.0480303	0.0325877	0.0479445	0.0421106	0.0246949	0.0418533	0.0461429	0.0702504	0.0716231	0.0319872	0.0307861	0.0669903	0.0313009	0.038679	0.0433117	0.036191	0.0276976	0.0258102	0.0217779	0.0373063	0.0754837	0.053521	0.0534352	0.0456281	0.0569527	0.0446844	0.0699073	0.0343894	0.0297566	0.0653603	0.0385932	0.0480303	0.0343894	0.0693067	0.0327307	0.0180031	0.0424538
cg00033773	0.764674	0.850751	0.764086	0.867025	0.860162	0.851241	0.813006	0.811046	0.827516	0.917808	0.812418	0.80183	0.905749	0.709185	0.887906	0.871044	0.592227	0.772321	0.739969	0.831829	0.684578	0.785164	0.856143	0.723989	0.708009	0.868985	0.881044	0.771733	0.917416	0.875456	0.844378	0.871142	0.807418	0.848496	0.848692	0.846241	0.735361	0.674676	0.705166	0.843986	0.867515	0.832712	0.661539	0.878103	0.8333	0.844084	0.814771	0.853201	0.811536
cg00034039	0.196522	0.0741931	0.108891	0.0785304	0.0921618	0.0790614	0.10898	0.098535	0.108891	0.0830447	0.0907456	0.0857002	0.0646333	0.120664	0.0725998	0.0675543	0.057375	0.0688821	0.0682625	0.0892408	0.111458	0.084992	0.0768485	0.0998627	0.0667577	0.0809203	0.0761404	0.0992431	0.0760519	0.0870279	0.0751667	0.0713605	0.0587027	0.0579946	0.104908	0.0700328	0.0634826	0.0970302	0.0996857	0.0702983	0.0612697	0.0980924	0.0789729	0.0678199	0.0689706	0.0766715	0.0809203	0.0641907	0.0961451
cg00035623	0.162627	0.0474331	0.0358804	0.104197	0.0164407	0.0708719	0.0678726	0.0559866	0.183622	0.072427	0.0372134	0.0514321	0.0302151	0.19462	0.0231057	0.144743	0.0232168	0.085646	0.0642068	0.106086	0.0544314	0.234721	0.145631	0.0774258	0.0728714	0.0303262	0.192176	0.061763	0.0293264	0.0111086	0.0487661	0.0594302	0.043323	0.0594302	0.0619851	0.250162	0.024883	0.0836465	0.363023	0.0655398	0.166849	0.0580972	0.0437673	0.134079	0.0553201	0.0383242	0.0470258	0.0836465	0.0317703
cg00037763	0.461322	0.894962	0.404161	0.545526	0.883508	0.581583	0.940563	0.742461	0.868661	0.773004	0.902703	0.738644	0.914263	0.797608	0.668438	0.870994	0.509257	0.633336	0.415296	0.712025	0.682225	0.528028	0.420705	0.584022	0.892841	0.33438	0.348591	0.92158	0.94576	0.950426	0.896871	0.678831	0.880221	0.608308	0.909279	0.632911	0.762081	0.50247	0.501409	0.869722	0.703859	0.828256	0.648713	0.778306	0.814364	0.877888	0.313523	0.571296	0.638532
cg00037940	0.881997	0.918407	0.938516	0.864029	0.716128	0.681979	0.940895	0.9309	0.918526	0.944584	0.929235	0.90746	0.927926	0.943989	0.896751	0.885328	0.876761	0.940538	0.883186	0.934946	0.797634	0.934589	0.878784	0.844991	0.907579	0.873786	0.825477	0.895323	0.945893	0.930662	0.844753	0.938159	0.939467	0.903533	0.933518	0.941728	0.904128	0.865576	0.934589	0.923642	0.911862	0.933161	0.802751	0.87926	0.914361	0.90508	0.683882	0.94625	0.924951
cg00040861	0.0353838	0.034544	0.0270693	0.0248857	0.028917	0.0256416	0.0207704	0.0255576	0.0276572	0.0321924	0.0298408	0.0277412	0.0336202	0.0225341	0.0264814	0.023458	0.0273213	0.0254736	0.0266494	0.0280771	0.0274053	0.028665	0.0218622	0.0284971	0.0243818	0.0329483	0.0253896	0.034292	0.0246337	0.0223661	0.0348799	0.0308486	0.0195107	0.0371475	0.0389112	0.0281611	0.0279092	0.0264814	0.0396671	0.0276572	0.0325284	0.0300928	0.0235419	0.0235419	0.0211064	0.0258935	0.0366996	0.0325284	0.0262295
cg00040873	0.081303	0.107591	0.242789	0.153492	0.0793209	0.107174	0.306424	0.192299	0.137427	0.127412	0.0857887	0.124074	0.220361	0.203044	0.130333	0.133671	0.048651	0.0713926	0.0751481	0.233401	0.100498	0.115833	0.170913	0.095699	0.212119	0.0634644	0.181032	0.140243	0.0459387	0.0798425	0.137009	0.0657594	0.119797	0.0676371	0.109782	0.18823	0.0687847	0.048651	0.176129	0.0681587	0.0682631	0.128247	0.0694106	0.0855801	0.0914219	0.110512	0.311605	0.0449999	0.0645076
cg00041575	0.58449	0.492162	0.286268	0.390136	0.45366	0.171925	0.740633	0.625805	0.432809	0.495363	0.661107	0.332722	0.53338	0.869523	0.492162	0.233218	0.295384	0.6324	0.248347	0.575374	0.351149	0.712217	0.197722	0.286074	0.792034	0.238649	0.134974	0.372873	0.811624	0.744803	0.316429	0.627939	0.505546	0.549673	0.64074	0.39644	0.399544	0.578768	0.610191	0.494781	0.484695	0.309641	0.39518	0.215082	0.488186	0.403326	0.339479	0.582551	0.398477
cg00043004	0.0145017	0.0994557	0.117645	0.115398	0.0525919	0.0464932	0.0658593	0.137867	0.0639334	0.0763448	0.0668222	0.1292	0.00925898	0.0640404	0.0391106	0.0555878	0.0991347	0.0128968	0.0667152	0.110476	0.162048	0.0823365	0.0419994	0.0422134	0.17478	0.0520569	0.0157857	0.153916	0.0746329	0.0149297	0.0337608	0.0851184	0.205167	0.0359007	0.108122	0.118073	0.0213494	0.0810526	0.129628	0.0380406	0.0407155	0.0851184	0.04981	0.029053	0.136797	0.106731	0.0803749	0.0682132	0.0632914
cg00044245	0.704717	0.296318	0.571561	0.46708	0.0649321	0.560051	0.179038	0.504288	0.215651	0.534849	0.30763	0.226565	0.555288	0.382245	0.596466	0.0818991	0.0393327	0.212872	0.468271	0.240456	0.105812	0.0647336	0.600137	0.0651305	0.258217	0.480177	0.507066	0.236388	0.573744	0.0635429	0.536238	0.165543	0.171894	0.526911	0.458646	0.0898368	0.0578873	0.0817998	0.434138	0.445449	0.726943	0.242143	0.496053	0.24125	0.258912	0.378276	0.0692317	0.0489573	0.442076
cg00047050	0.0752011	0.0499054	0.0611758	0.0419744	0.0246096	0.0287004	0.102918	0.0330415	0.0387185	0.0417239	0.0337094	0.0719453	0.0418909	0.0351287	0.0369653	0.0378836	0.0391359	0.0320397	0.0446459	0.0341268	0.0343773	0.075869	0.0539126	0.0342103	0.0393864	0.0487366	0.0527439	0.0416404	0.0420579	0.0461486	0.0275316	0.0748672	0.0432266	0.0440615	0.114439	0.0487366	0.0341268	0.0354626	0.0474843	0.0524099	0.0532448	0.0591721	0.038468	0.0552484	0.0261958	0.0364644	0.0425031	0.0261123	0.0349617
cg00047469	0.0707797	0.0686196	0.0570711	0.0824944	0.0600621	0.086067	0.0613914	0.0718598	0.0643824	0.0613914	0.0494275	0.0678719	0.057985	0.130018	0.0641331	0.0587328	0.0538309	0.0643824	0.0572373	0.0711121	0.0652963	0.0491783	0.0562403	0.0707797	0.0661271	0.0637177	0.0567388	0.0809989	0.0462704	0.0540801	0.0768448	0.0502583	0.0646316	0.0475997	0.0583174	0.055908	0.0611422	0.0666256	0.0864824	0.0584835	0.0588989	0.0583174	0.0500091	0.065047	0.0593143	0.0487629	0.0691181	0.0455226	0.0858177
cg00050312	0.0404072	0.0490269	0.0371434	0.0559728	0.033796	0.0235863	0.0317038	0.0284401	0.0464326	0.0355534	0.0370598	0.0558054	0.0323733	0.0343818	0.0321223	0.0345492	0.0261806	0.032206	0.026599	0.0384824	0.0435873	0.0317875	0.0520396	0.0538806	0.0494453	0.0388172	0.0317875	0.0573118	0.0305322	0.0292769	0.0317038	0.0304486	0.0314528	0.0246742	0.0302812	0.0249253	0.0317875	0.0530438	0.0592366	0.033796	0.0282727	0.085765	0.0265153	0.0283564	0.0312854	0.0237537	0.0286911	0.0285238	0.0449262
cg00051979	0.0743293	0.0637887	0.0739999	0.0577773	0.0628005	0.056048	0.0680708	0.0737529	0.0856934	0.0515188	0.043531	0.0593419	0.0518482	0.104469	0.0495424	0.0427899	0.0531658	0.134197	0.0483896	0.0432016	0.0991162	0.0839641	0.0701296	0.0837994	0.0630476	0.0788585	0.0474837	0.100187	0.0502836	0.0846229	0.0600007	0.0348021	0.0442722	0.0535775	0.10661	0.0649416	0.0632123	0.0862698	0.0596713	0.0576126	0.0710354	0.0502836	0.0374372	0.0474837	0.0735058	0.0573655	0.0673023	0.0400724	0.0957399
cg00053292	0.277508	0.0545469	0.0388661	0.0764347	0.0573237	0.0605906	0.0438481	0.0654908	0.0764347	0.0979142	0.0518518	0.0644291	0.0594472	0.0675326	0.0609173	0.061489	0.0578138	0.0721062	0.0542203	0.0578138	0.0512801	0.0595289	0.0529135	0.0587938	0.0583038	0.0592838	0.0658175	0.0765164	0.0409896	0.0664709	0.0528319	0.0465432	0.0507901	0.0564254	0.0708811	0.049075	0.0609173	0.0609989	0.069656	0.0407446	0.075618	0.0600189	0.0536486	0.0536486	0.036171	0.0636941	0.0584671	0.0443381	0.0506267
cg00054706	0.0368291	0.0317206	0.0291663	0.0299079	0.0259529	0.0423496	0.0247993	0.0280951	0.030155	0.0300726	0.0245521	0.0335333	0.0258705	0.0276832	0.0518252	0.01829	0.0360052	0.0356756	0.0361699	0.0296607	0.0359228	0.0235634	0.0276008	0.0396306	0.0339453	0.0346044	0.0264472	0.0325445	0.0219155	0.018702	0.0257881	0.023893	0.0277656	0.0263648	0.0403721	0.0244697	0.0225746	0.0292487	0.0328741	0.0260353	0.0392186	0.0341924	0.0296607	0.0268592	0.0189492	0.0201027	0.0308417	0.0238106	0.0299079
cg00056767	0.015521	0.0297286	0.0505202	0.06184	0.0417415	0.498001	0.0256858	0.0456688	0.0389693	0.0766252	0.0368901	0.0464773	0.280614	0.0519063	0.00731984	0.0381607	0.0224515	0.055487	0.0247617	0.0240686	0.144198	0.0276494	0.0325008	0.035504	0.0487875	0.0404709	0.0229135	0.0632261	0.0212964	0.0197948	0.0271874	0.0322698	0.0203723	0.0449757	0.0579127	0.0433586	0.0334248	0.0405864	0.0535234	0.0318077	0.0240686	0.0366591	0.0173691	0.0279959	0.0349265	0.0322698	0.0428196	0.0309992	0.0465929
cg00059225	0.216989	0.471899	0.532203	0.419851	0.33185	0.468763	0.374282	0.267469	0.47702	0.792339	0.291403	0.449951	0.556137	0.458834	0.239146	0.683853	0.25106	0.29318	0.517885	0.551643	0.510778	0.269768	0.75555	0.498236	0.194623	0.601287	0.448069	0.399888	0.504193	0.516108	0.600451	0.281265	0.481409	0.210195	0.356202	0.418701	0.229739	0.26726	0.390169	0.330805	0.208628	0.451518	0.25221	0.581325	0.210927	0.614247	0.250921	0.402501	0.574636
cg00059424	0.027968	0.0317925	0.0397434	0.0261563	0.0176015	0.0237409	0.0291757	0.0249486	0.0357176	0.0296789	0.0212247	0.0283705	0.0266596	0.0351138	0.0202183	0.0253512	0.0298802	0.0278673	0.0408505	0.0294776	0.0494054	0.0255525	0.0251499	0.0265589	0.0301821	0.0354157	0.0247473	0.0327989	0.0306854	0.0201176	0.0191112	0.0380325	0.0230363	0.0314905	0.0327989	0.0212247	0.0249486	0.0273641	0.0338054	0.0260557	0.0322957	0.0282699	0.0291757	0.0296789	0.0272634	0.0290751	0.0357847	0.0170983	0.0542363
cg00059740	0.0292291	0.0299696	0.0367156	0.0344943	0.0233881	0.0208377	0.0267611	0.0219072	0.0330135	0.0287355	0.0270901	0.0287355	0.0256916	0.0168065	0.0190278	0.0247044	0.0249512	0.027337	0.0288178	0.0379496	0.0346589	0.023059	0.0218249	0.0502077	0.0371269	0.0311213	0.0238817	0.0323554	0.0260207	0.0327667	0.020015	0.0126931	0.0250334	0.0237994	0.025527	0.0212491	0.0249512	0.0428035	0.03071	0.0256093	0.0310391	0.0268433	0.025527	0.0296405	0.0235526	0.0254448	0.038169	0.0265143	0.0369624
cg00059930	0.909779	0.690508	0.773613	0.841645	0.493644	0.779418	0.520531	0.857838	0.610255	0.87118	0.744995	0.596812	0.839608	0.53265	0.828609	0.650484	0.492727	0.8723	0.618199	0.742041	0.660464	0.851626	0.835432	0.749782	0.549556	0.763531	0.785936	0.777076	0.503523	0.88116	0.833803	0.568296	0.670445	0.484885	0.716886	0.704563	0.444759	0.797648	0.7453	0.759864	0.879225	0.652215	0.800907	0.775141	0.828813	0.703239	0.850913	0.844191	0.776872
cg00060762	0.0364245	0.0290808	0.0304752	0.0314977	0.0211794	0.022109	0.0275935	0.0306611	0.087737	0.0575258	0.0281512	0.0384695	0.0159738	0.0371681	0.0212724	0.0271287	0.0327062	0.026478	0.0350301	0.0367033	0.0446977	0.0267569	0.0274076	0.0369822	0.0260132	0.0448836	0.0415371	0.0285231	0.0203428	0.0295456	0.0256414	0.026385	0.0188555	0.0281512	0.0295456	0.0208076	0.0215512	0.0306611	0.0420019	0.0437681	0.0446047	0.0355878	0.0260132	0.0380977	0.0382836	0.0212724	0.0303822	0.0234104	0.0543653
cg00060882	0.107883	0.174362	0.066042	0.117205	0.182131	0.066042	0.140956	0.308873	0.125418	0.163707	0.0874618	0.163818	0.181687	0.138304	0.0707033	0.150167	0.0717021	0.132299	0.132965	0.161932	0.191453	0.092678	0.122532	0.147282	0.0513922	0.0713692	0.140734	0.135531	0.0455101	0.174473	0.0544997	0.0846872	0.085797	0.108216	0.155162	0.101113	0.085908	0.139513	0.124974	0.144396	0.161155	0.180355	0.115541	0.187014	0.092345	0.0947867	0.0785091	0.140179	0.092345
cg00061059	0.0671442	0.0417779	0.0555944	0.034114	0.0349776	0.0367046	0.0328187	0.0464194	0.103305	0.0486862	0.0317393	0.054515	0.0451241	0.0547309	0.0442606	0.0412382	0.0585089	0.0329267	0.0621789	0.0576453	0.0769669	0.0431811	0.0354093	0.0753478	0.0404826	0.0886246	0.0412382	0.0625027	0.0266661	0.0603439	0.041562	0.030552	0.0338982	0.0903517	0.0414541	0.0469591	0.0440447	0.069411	0.0676839	0.0457717	0.0491179	0.0485782	0.0520324	0.0531118	0.0423176	0.0371364	0.065669	0.0538674	0.0815004
cg00061629	0.74739	0.409228	0.213239	0.334081	0.839212	0.115786	0.528121	0.821346	0.397858	0.793518	0.26294	0.597312	0.638351	0.49399	0.246806	0.232188	0.295749	0.859569	0.533102	0.31524	0.230889	0.437273	0.682529	0.508305	0.307227	0.176424	0.242583	0.595363	1.02838	0.493146	0.093372	0.157041	0.271928	0.102359	0.632828	0.381183	0.45763	0.176099	0.235329	0.641383	0.864767	0.411827	0.316106	0.484375	0.465101	0.487407	0.172525	0.775002	0.447235
cg00062776	0.974778	0.828087	0.961969	0.975223	0.565223	0.955174	0.981238	0.95963	0.941251	0.624144	0.953726	0.956734	0.954506	0.684403	0.276519	0.953726	0.961857	0.967315	0.927551	0.964308	0.678388	0.663685	0.956288	0.946598	0.957513	0.961857	0.917972	0.626149	0.680281	0.667138	0.562995	0.797233	0.904495	0.933121	0.808372	0.780749	0.631384	0.464533	0.952613	0.918975	0.643748	0.981127	0.935905	0.688301	0.814275	0.947489	0.719897	0.953169	0.932229
cg00063144	0.922671	0.925244	0.744886	0.936707	0.93542	0.907583	0.948169	0.939865	0.905477	0.842434	0.916238	0.927116	0.943023	0.921735	0.931326	0.919981	0.927233	0.925595	0.903489	0.928402	0.863253	0.932145	0.854949	0.890623	0.924893	0.803836	0.862552	0.872494	0.943608	0.919162	0.757752	0.889921	0.921618	0.893781	0.933783	0.935537	0.902085	0.912729	0.926063	0.8946	0.907466	0.921267	0.862084	0.923607	0.926765	0.908168	0.821341	0.905711	0.938578
cg00065385	0.952477	0.961217	0.927277	0.966611	0.945688	0.947455	0.954336	0.943364	0.942992	0.966053	0.953127	0.958149	0.960288	0.85521	0.95787	0.943364	0.941597	0.973399	0.950524	0.958056	0.947083	0.962426	0.937133	0.95973	0.954615	0.954057	0.951082	0.958428	0.968285	0.949408	0.936947	0.942806	0.961217	0.957963	0.955173	0.959823	0.853723	0.949501	0.965867	0.955452	0.964193	0.964658	0.93546	0.952105	0.955638	0.966053	0.940202	0.924673	0.94699
cg00065408	0.15884	0.0625925	0.0444424	0.0502888	0.0439188	0.0550008	0.0471474	0.040952	0.0481946	0.0501143	0.0466239	0.032575	0.0426099	0.0443551	0.0328368	0.0467984	0.0426972	0.037287	0.0488054	0.0431335	0.0397303	0.0371125	0.0513359	0.0381597	0.0515977	0.043308	0.0399921	0.0532556	0.0347565	0.0403412	0.0537792	0.0386832	0.0375488	0.0437443	0.038596	0.0387705	0.0449659	0.0392068	0.06076	0.0313534	0.0641631	0.0426099	0.0379851	0.065123	0.0467111	0.0390323	0.0473801	0.0239363	0.0411265
cg00066153	0.910476	0.956013	0.955375	0.951368	0.952279	0.928782	0.965029	0.958472	0.934155	0.966759	0.965211	0.948545	0.958016	0.92186	0.959747	0.951823	0.955375	0.957925	0.954373	0.95747	0.947361	0.959747	0.96257	0.94472	0.959565	0.956832	0.955831	0.957106	0.963025	0.955193	0.960931	0.957106	0.96002	0.957561	0.937252	0.955284	0.965393	0.943445	0.955557	0.95155	0.951186	0.954191	0.948545	0.948727	0.963936	0.958927	0.948423	0.947725	0.959474
cg00066816	0.0757691	0.337937	0.143369	0.181119	0.134699	0.100241	0.304796	0.109459	0.392697	0.0991437	0.122957	0.27363	0.832204	0.101997	0.107264	0.0837801	0.0864139	0.322354	0.0703919	0.157525	0.193081	0.06699	0.401367	0.164878	0.0804879	0.482574	0.156757	0.236428	0.129542	0.045481	0.5054	0.214699	0.354617	0.340242	0.19747	0.265728	0.102326	0.229185	0.20197	0.211407	0.59802	0.179034	0.0893768	0.472917	0.182985	0.263863	0.0383114	0.126469	0.481037
cg00067471	0.209414	0.0868633	0.0549206	0.05846	0.0535049	0.0492576	0.284537	0.134291	0.0646539	0.103056	0.145882	0.127035	0.0437716	0.0551861	0.0394359	0.094473	0.0385511	0.0611145	0.0468686	0.113762	0.172516	0.0873942	0.0762453	0.0540358	0.0489037	0.0593448	0.0595218	0.0731483	0.0509388	0.0271366	0.0604951	0.05262	0.101729	0.0718211	0.0949154	0.0887215	0.061026	0.0679278	0.0963311	0.0399668	0.238259	0.0762453	0.0595218	0.121991	0.0620878	0.0981893	0.0412646	0.0497885	0.0543897
cg00069261	0.0571251	0.0562666	0.0380233	0.0369502	0.0334089	0.0436036	0.0386672	0.0458572	0.0291163	0.0266481	0.0364136	0.0618469	0.0989773	0.0441402	0.0196728	0.0363063	0.0270774	0.0311553	0.0325504	0.0477889	0.0586275	0.0275066	0.0404916	0.0445695	0.0674272	0.0455353	0.061203	0.0561593	0.0198874	0.0313699	0.0493986	0.020424	0.0712905	0.0227849	0.0497205	0.041672	0.0384526	0.0279359	0.0676418	0.0412427	0.0539057	0.0492912	0.0314772	0.0412427	0.0419939	0.0384526	0.0307976	0.027292	0.0363063
cg00071250	0.717044	0.683391	0.60716	0.78835	0.829082	0.682878	0.802303	0.855757	0.765265	0.851961	0.761366	0.599055	0.622755	0.906031	0.773063	0.817591	0.796866	0.893924	0.605724	0.737153	0.626654	0.822413	0.735204	0.781271	0.880689	0.672516	0.465471	0.654458	0.821079	0.83811	0.77768	0.769677	0.673952	0.785169	0.732844	0.725354	0.429254	0.849807	0.801175	0.806715	0.857604	0.57874	0.701859	0.758904	0.837495	0.616907	0.734041	0.751722	0.756955
cg00071998	0.0852212	0.0383179	0.0555797	0.042677	0.0434616	0.0534002	0.0424154	0.050436	0.0383179	0.0430257	0.0580208	0.141191	0.0411077	0.0394513	0.042677	0.032564	0.0428513	0.0477334	0.0394513	0.0334358	0.044159	0.0520053	0.0398	0.0466001	0.0449437	0.036923	0.0403231	0.0386666	0.0411077	0.0445949	0.0538361	0.0367487	0.0376205	0.0506104	0.0651696	0.0314306	0.0414564	0.0473847	0.0664773	0.035005	0.0528771	0.0360512	0.0357897	0.0316922	0.0303845	0.0413692	0.0385504	0.0418051	0.0480822
cg00072216	0.0196421	0.018504	0.0180772	0.0193575	0.0119602	0.0133828	0.0106799	0.0176505	0.0202111	0.0150898	0.0162279	0.0159434	0.0105376	0.0170814	0.0142363	0.0142363	0.0133828	0.0130982	0.012387	0.0139518	0.0189308	0.0163701	0.0126715	0.0210646	0.0103954	0.0193575	0.00883054	0.0199266	0.0102531	0.0130982	0.00982634	0.0109644	0.0103954	0.0243365	0.0130982	0.0105376	0.0156589	0.0193575	0.0176505	0.0142363	0.0278929	0.0133828	0.0163701	0.0187885	0.0103954	0.0121024	0.0210646	0.0159434	0.0204956
cg00075967	0.122442	0.523194	0.726782	0.567008	0.439147	0.472218	0.660113	0.714354	0.451575	0.388697	0.415344	0.630307	0.367317	0.238929	0.234189	0.700767	0.572906	0.796505	0.337089	0.493914	0.776283	0.202066	0.274738	0.329611	0.311917	0.346252	0.277582	0.437567	0.105275	0.511924	0.144876	0.553948	0.601975	0.484857	0.649159	0.74753	0.447467	0.373531	0.555107	0.397544	0.0707291	0.723517	0.337721	0.50729	0.5629	0.410815	0.279022	0.740579	0.841583
cg00076645	0.0317385	0.0307363	0.0481757	0.0439662	0.0173059	0.0286315	0.0259254	0.0259254	0.0401576	0.0300347	0.0292329	0.0420619	0.195709	0.0271281	0.0259254	0.0243218	0.0236202	0.0242215	0.0337431	0.0423625	0.0304356	0.0165041	0.0291326	0.039456	0.0318388	0.026627	0.0243218	0.0320392	0.0351462	0.0334424	0.0535879	0.0333422	0.0181077	0.035046	0.0273286	0.0474741	0.0321394	0.0368501	0.0430641	0.0383535	0.0340437	0.0349458	0.0227181	0.0271281	0.0302351	0.0351462	0.0276627	0.025324	0.0348456
cg00077877	0.615333	0.829753	0.361852	0.382421	0.542094	0.582194	0.425222	0.703532	0.553105	0.472386	0.754124	0.649927	0.764721	0.592063	0.135069	0.525784	0.722335	0.354891	0.395719	0.804925	0.628319	0.0977741	0.295053	0.741762	0.517784	0.791627	0.308766	0.784979	0.864347	0.589258	0.32892	0.752358	0.728569	0.49815	0.622605	0.796718	0.695741	0.696676	0.529212	0.302429	0.114707	0.641616	0.290586	0.797653	0.683586	0.783628	0.672713	0.748515	0.525887
cg00078194	0.0248847	0.0199247	0.0487438	0.0258253	0.0220626	0.0314694	0.0243716	0.0289039	0.0399356	0.0344625	0.0259964	0.0250557	0.031897	0.0253978	0.0372846	0.0231743	0.0231743	0.0173592	0.0230033	0.0275357	0.0423301	0.0318115	0.0247991	0.0389949	0.0319825	0.0409618	0.0204378	0.0263384	0.0253978	0.0167606	0.0225757	0.024115	0.0210364	0.0250557	0.0249702	0.0245426	0.0297591	0.0333508	0.0297591	0.0362584	0.0244571	0.0224902	0.0181288	0.0312984	0.0266805	0.0236874	0.0319255	0.0306998	0.0369425
cg00078867	0.912578	0.762097	0.344304	0.565582	0.920409	0.479759	0.7985	0.875646	0.700296	0.883477	0.813421	0.57246	0.844428	0.885699	0.73109	0.825697	0.78506	0.923478	0.572884	0.465261	0.53394	0.88771	0.745482	0.798923	0.791092	0.467483	0.498066	0.756805	0.854269	0.862947	0.186097	0.525369	0.68675	0.678496	0.812998	0.655003	0.623573	0.76379	0.58209	0.80432	0.926018	0.655215	0.66876	0.78051	0.848872	0.700296	0.568898	0.783685	0.733418
cg00079563	0.0192998	0.0134032	0.0140383	0.0166691	0.0122239	0.0125868	0.0117703	0.0148547	0.025015	0.187852	0.0126775	0.0155805	0.133694	0.0340867	0.0118611	0.0146733	0.0114982	0.0301859	0.0211142	0.0229285	0.016034	0.0118611	0.0179391	0.0193906	0.016034	0.0153083	0.0188463	0.0134032	0.0104096	0.0114075	0.0142197	0.009956	0.0121332	0.0495993	0.0128589	0.0212049	0.0132218	0.014764	0.0167598	0.0173948	0.0173041	0.0268293	0.0166691	0.0136754	0.0103189	0.0159433	0.0196022	0.0241986	0.0153083
cg00080012	0.0267298	0.0200543	0.0168793	0.0214382	0.0172864	0.0200543	0.0193216	0.023392	0.0209498	0.0207055	0.0150069	0.019403	0.0188331	0.0227408	0.013623	0.0248574	0.0223337	0.0215196	0.0154954	0.0154954	0.0259157	0.0197286	0.0187517	0.0272183	0.017205	0.0228222	0.0184261	0.0202171	0.0178562	0.0190774	0.0144371	0.0154954	0.0170421	0.0242061	0.0303932	0.0182633	0.0199729	0.0218453	0.0199729	0.0225779	0.021601	0.0185075	0.019403	0.0259971	0.0171235	0.018019	0.0178291	0.0220081	0.0169607
cg00081935	0.0694737	0.0451535	0.0328048	0.0673999	0.026112	0.0213045	0.0426083	0.0256407	0.0451535	0.262339	0.0303539	0.0595759	0.34991	0.0212103	0.0893635	0.0341245	0.0352557	0.0266776	0.0334647	0.0332761	0.0752238	0.0222472	0.0216816	0.0384607	0.0196078	0.250744	0.0785231	0.0344073	0.0272432	0.0240382	0.153558	0.0240382	0.0671171	0.0345016	0.0263948	0.0393091	0.0247923	0.0319564	0.0632522	0.117926	0.0214931	0.0970932	0.0264891	0.0266776	0.0145175	0.121131	0.0763236	0.0269604	0.0411001
cg00081975	0.018103	0.107895	0.128122	0.0365108	0.0239892	0.0186381	0.0300895	0.0292333	0.0458217	0.0399355	0.0400426	0.056738	0.0257016	0.0219558	0.0203505	0.0251665	0.0224909	0.0157485	0.0334072	0.0570591	0.0460358	0.0261297	0.0311597	0.0365108	0.0334072	0.0400426	0.0156415	0.0358687	0.0303035	0.0194943	0.0151064	0.0244173	0.0586644	0.0651927	0.0201365	0.0388653	0.0267718	0.0353336	0.0502097	0.0248454	0.0183171	0.154235	0.0366178	0.0205645	0.0404706	0.103507	0.0335499	0.0163907	0.0366178
cg00083937	0.790273	0.560428	0.631896	0.795803	0.912969	0.832319	0.692827	0.834615	0.482387	0.798098	0.728821	0.582547	0.836388	0.897423	0.717345	0.701486	0.724439	0.917246	0.893145	0.595588	0.637634	0.908482	0.894815	0.50002	0.789856	0.821051	0.750001	0.598823	0.697208	0.629601	0.800394	0.707537	0.647129	0.72204	0.801959	0.706703	0.543839	0.469241	0.705346	0.677385	0.824912	0.553021	0.645146	0.664448	0.692201	0.697626	0.826546	0.672377	0.652658
cg00084687	0.0196615	0.0149129	0.0157212	0.0132963	0.0118818	0.0149129	0.0126901	0.015216	0.0207729	0.0156201	0.0127912	0.0147108	0.0134984	0.0191564	0.0126901	0.0142056	0.0128922	0.0138015	0.012185	0.0132963	0.0202677	0.0119829	0.0138015	0.0203688	0.0124881	0.0173377	0.0101643	0.0148119	0.0109725	0.0112756	0.0125891	0.0112756	0.012387	0.0188533	0.0178429	0.0145088	0.0133974	0.0177419	0.0141046	0.0178429	0.0142056	0.0140036	0.0129932	0.0229957	0.015216	0.0138015	0.0175735	0.0149129	0.0176408
cg00089071	0.0130389	0.0137114	0.017458	0.0170737	0.0115018	0.0193794	0.0116939	0.0130389	0.0288902	0.0144799	0.0119821	0.0147681	0.01179	0.0125585	0.014672	0.0128467	0.014672	0.0113096	0.0201479	0.0155367	0.0200519	0.0113096	0.017362	0.0204361	0.0101568	0.0162091	0.018803	0.0149602	0.0110214	0.0141917	0.0139035	0.0152484	0.0101568	0.0191873	0.0113096	0.013231	0.0116939	0.0204361	0.0115978	0.0153445	0.0161131	0.0153445	0.0126546	0.0179384	0.0087158	0.0118861	0.020212	0.0134231	0.020244
cg00090147	0.355081	0.405292	0.444489	0.386503	0.275607	0.485414	0.504095	0.661531	0.455827	0.704184	0.515757	0.246668	0.799963	0.844451	0.629353	0.14225	0.17648	0.774803	0.423757	0.389311	0.380672	0.513489	0.639071	0.400541	0.151429	0.500531	0.262001	0.384992	0.133396	0.183823	0.119142	0.520076	0.377325	0.670278	0.306921	0.409179	0.196349	0.185443	0.25455	0.590264	0.921009	0.44233	0.315992	0.407128	0.252499	0.545559	0.271252	0.648573	0.621794
cg00091693	0.582326	0.554357	0.230634	0.330606	0.284443	0.598198	0.317541	0.205955	0.453901	0.317831	0.343574	0.697008	0.592101	0.171793	0.220859	0.308444	0.26799	0.233537	0.188245	0.447998	0.418384	0.535002	0.197923	0.276894	0.169857	0.296346	0.270603	0.4179	0.153792	0.174406	0.163373	0.295185	0.755946	0.240699	0.705912	0.540518	0.25928	0.295282	0.775689	0.363704	0.858144	0.444223	0.254248	0.207117	0.276603	0.365543	0.159244	0.258119	0.33438
cg00093177	0.904231	0.928331	0.859145	0.90573	0.87967	0.927639	0.924987	0.890048	0.900656	0.924641	0.930637	0.899042	0.943552	0.924064	0.922681	0.929369	0.938939	0.905499	0.938132	0.92072	0.911726	0.944474	0.893738	0.896275	0.932828	0.920951	0.922335	0.889933	0.940208	0.897428	0.91507	0.861105	0.926486	0.894891	0.901579	0.909535	0.90573	0.861336	0.903193	0.905961	0.888088	0.924295	0.862604	0.902732	0.885781	0.928215	0.921412	0.941591	0.93352
cg00094851	0.094749	0.0805362	0.0902174	0.0847589	0.0709581	0.0751807	0.0739448	0.0777555	0.0897024	0.0841409	0.0671474	0.0921742	0.0816691	0.0784764	0.0567453	0.0676623	0.0632337	0.0633367	0.0745627	0.0912473	0.0923802	0.0737388	0.0708551	0.0845529	0.0756956	0.0776525	0.0893935	0.0935131	0.0643666	0.0791973	0.0757986	0.0769315	0.0667354	0.0767256	0.0766226	0.0854798	0.0798153	0.0753867	0.105666	0.0634397	0.0784764	0.0920712	0.0649846	0.0652935	0.0745627	0.0768285	0.0882949	0.0663235	0.0749747
cg00095526	0.660184	0.716401	0.500871	0.702992	0.66366	0.806983	0.736067	0.777385	0.733881	0.777683	0.737854	0.546261	0.76785	0.762784	0.730703	0.759209	0.645186	0.803904	0.557187	0.707462	0.636545	0.76775	0.581223	0.590261	0.797746	0.68859	0.583408	0.59622	0.850784	0.695742	0.431643	0.718884	0.657304	0.678261	0.819001	0.727425	0.475941	0.620654	0.695444	0.778875	0.648663	0.652934	0.641412	0.566324	0.735967	0.623633	0.722956	0.72683	0.723949
cg00095674	0.0683015	0.0573807	0.0559999	0.0735736	0.0557489	0.0626528	0.0474642	0.129809	0.0534894	0.0735736	0.044326	0.0744523	0.0888878	0.0539915	0.0534894	0.0603933	0.0580084	0.177258	0.0522342	0.0527363	0.0484684	0.04646	0.182279	0.0447026	0.0439494	0.157425	0.0598912	0.0519831	0.0436984	0.0479663	0.04646	0.0659165	0.0390539	0.0683015	0.584716	0.0706865	0.0583849	0.04169	0.0640336	0.0670462	0.0613976	0.0536149	0.0498492	0.0600168	0.0394305	0.23023	0.0605189	0.0444515	0.0534894
cg00096922	0.0292682	0.212742	0.0956174	0.576465	0.531956	0.570659	0.430036	0.593237	0.217811	0.660323	0.318348	0.211821	0.699856	0.0416166	0.381103	0.411882	0.588629	0.403128	0.59167	0.404879	0.0703679	0.0245685	0.561076	0.463395	0.0565451	0.411698	0.481364	0.0705522	0.553335	0.0101928	0.741693	0.0560844	0.206937	0.428469	0.541355	0.137823	0.0369168	0.484682	0.501269	0.105478	0.463395	0.184636	0.0173807	0.0336915	0.0193158	0.468832	0.0253979	0.358895	0.0695385
cg00097536	0.0347124	0.0593244	0.0395528	0.0630983	0.0525151	0.0382401	0.0566171	0.0552224	0.0595705	0.0516947	0.0514486	0.0498898	0.0418499	0.0528433	0.0333178	0.0524331	0.0439009	0.0617036	0.0510384	0.064575	0.0549763	0.0480849	0.0548122	0.0599807	0.0493155	0.0547302	0.0413577	0.0572734	0.0495617	0.0434087	0.0462801	0.0364353	0.0561249	0.058422	0.0448854	0.0421781	0.0521869	0.0503821	0.06679	0.0418499	0.0616215	0.0539098	0.0497257	0.0498078	0.0548943	0.0601448	0.0481396	0.0319231	0.0606371
cg00098239	0.0303666	0.0240593	0.0210389	0.0211277	0.0166859	0.0161529	0.0189068	0.0268132	0.0255695	0.025303	0.0236151	0.0319656	0.0201505	0.0261025	0.0191733	0.0291229	0.0200617	0.0203282	0.0190845	0.0254806	0.02477	0.0216607	0.014998	0.0256583	0.019351	0.0287676	0.0199728	0.0273462	0.0166859	0.018818	0.018285	0.021483	0.0141985	0.019884	0.019351	0.0203282	0.0199728	0.0228156	0.0265467	0.0159752	0.0299224	0.0275239	0.0245035	0.0202393	0.019351	0.0213942	0.0231709	0.0222826	0.0293894
cg00101227	0.870511	0.900703	0.760658	0.755432	0.921837	0.785392	0.90918	0.935192	0.895013	0.922999	0.878872	0.900238	0.767509	0.932985	0.915218	0.905696	0.890484	0.952378	0.816397	0.891297	0.893271	0.933914	0.812217	0.890019	0.919631	0.904419	0.869582	0.8157	0.92776	0.91847	0.661837	0.873414	0.858666	0.874459	0.898613	0.889903	0.627696	0.799095	0.922882	0.826035	0.910573	0.888974	0.908251	0.37234	0.905696	0.879104	0.918547	0.893619	0.88851
cg00103783	0.0246511	0.0177771	0.0209016	0.0255438	0.0176878	0.0157238	0.0181342	0.0155453	0.0249189	0.0253653	0.0175986	0.0216158	0.0198304	0.0245618	0.0141169	0.0160809	0.0163487	0.0184913	0.0206338	0.0188484	0.0255438	0.0218836	0.0166166	0.0195625	0.0169736	0.0200982	0.0170629	0.0209016	0.0180449	0.0133135	0.0153667	0.0188484	0.0135813	0.0326856	0.0191162	0.0167951	0.0200982	0.0207231	0.0200089	0.0183127	0.0185805	0.0197411	0.0202767	0.0159916	0.0155453	0.0168844	0.0234013	0.0176878	0.0189376
cg00105253	0.0571195	0.0638488	0.032625	0.0496725	0.0551456	0.0577476	0.0591831	0.0632207	0.0636693	0.0600804	0.0506594	0.0808962	0.0474294	0.0645665	0.0421357	0.0381879	0.0282286	0.0346887	0.0370215	0.0703088	0.0746156	0.0635796	0.0518258	0.054697	0.0375598	0.0473397	0.0340606	0.092291	0.0324456	0.0625926	0.0374701	0.0407001	0.0770381	0.038457	0.0548764	0.0714752	0.054697	0.0509286	0.0881638	0.0529922	0.0493136	0.0489547	0.0319072	0.0442891	0.0367523	0.0490444	0.0395636	0.0333428	0.0449171
cg00105470	0.0324038	0.0148333	0.0174795	0.0168444	0.0151508	0.0173736	0.0173736	0.0202315	0.0226659	0.0157859	0.0154684	0.0165268	0.0173736	0.0230893	0.0157859	0.0153625	0.020549	0.0175853	0.0168444	0.0139865	0.0174795	0.0183262	0.0157859	0.0206548	0.0188555	0.0195964	0.017797	0.0190672	0.0152567	0.0144099	0.0148333	0.0170561	0.0147275	0.0218192	0.0200198	0.0158918	0.0161035	0.0192788	0.0155742	0.019173	0.0175853	0.0135631	0.0167385	0.0182204	0.0168444	0.0169502	0.0221367	0.0217133	0.0175853
cg00107187	0.172567	0.492584	0.61198	0.687782	0.547023	0.66219	0.536178	0.512212	0.471654	0.666636	0.429036	0.412227	0.68236	0.125177	0.693096	0.53954	0.117695	0.160747	0.340654	0.422963	0.214968	0.383056	0.653189	0.578905	0.269082	0.604823	0.547999	0.215185	0.489114	0.525551	0.64961	0.173326	0.380887	0.130057	0.542034	0.409191	0.14936	0.620439	0.596473	0.536829	0.683445	0.277215	0.16118	0.448881	0.155758	0.49497	0.698084	0.413745	0.607642
cg00107632	0.0184116	0.0358809	0.0360457	0.0362929	0.0335736	0.0339857	0.0366225	0.0215429	0.0433795	0.0475821	0.0433795	0.0475821	0.0292063	0.0474173	0.0283823	0.0293711	0.0352217	0.0546687	0.0348097	0.0382706	0.0385178	0.0325848	0.0331616	0.0342329	0.0348921	0.0406603	0.0363753	0.0482413	0.0338208	0.0274759	0.0384354	0.0303599	0.0339857	0.0409899	0.0359633	0.0329968	0.0377762	0.0426379	0.0547511	0.0469228	0.0353865	0.0413195	0.0295359	0.0333264	0.0294535	0.0349745	0.0486258	0.0203892	0.040001
cg00108454	0.387823	0.369597	0.270057	0.303604	0.284978	0.26505	0.368696	0.323332	0.239614	0.2296	0.355878	0.422371	0.159201	0.211475	0.216682	0.225795	0.238413	0.251431	0.189644	0.334347	0.296194	0.180832	0.17963	0.262947	0.228699	0.257139	0.255737	0.319226	0.223692	0.170818	0.169115	0.352974	0.420068	0.216482	0.367694	0.379411	0.213277	0.23661	0.334247	0.288083	0.134467	0.376106	0.232004	0.206368	0.313719	0.268655	0.159201	0.275865	0.252833
cg00109274	0.0463195	0.0409116	0.0884767	0.028498	0.0745882	0.0264085	0.0453362	0.0396825	0.0444759	0.070778	0.0484089	0.0555375	0.0434926	0.080119	0.0398054	0.0412803	0.0393138	0.0473028	0.0437385	0.0444759	0.0622974	0.0417719	0.0427552	0.0621745	0.056275	0.0507442	0.0346433	0.0785212	0.0396825	0.0418948	0.0386993	0.0321852	0.0164531	0.0383305	0.0710238	0.0454592	0.0584873	0.0361182	0.0595935	0.0389451	0.0233359	0.0577499	0.0550459	0.0442301	0.0473028	0.0444759	0.0733591	0.0642639	0.0608225
cg00112517	0.0763211	0.0892695	0.0606712	0.0954177	0.0481885	0.0560134	0.0818172	0.0427855	0.0735264	0.0541504	0.0625342	0.126997	0.0502379	0.0391525	0.0480022	0.0631863	0.0368236	0.0592738	0.0469775	0.0839597	0.103988	0.0543367	0.0499584	0.0816309	0.0492132	0.0684961	0.0552682	0.0881517	0.0582491	0.047909	0.0362647	0.129885	0.0862886	0.0577834	0.0801404	0.0790226	0.0464185	0.0839597	0.104267	0.0451144	0.0456733	0.0844255	0.0440897	0.0655152	0.0670056	0.103429	0.0506105	0.0409224	0.0555477
cg00113951	0.0962207	0.1149	0.0752557	0.0926438	0.0532971	0.060451	0.0905572	0.138846	0.0748583	0.0733679	0.0611466	0.0720762	0.0855892	0.0488259	0.0459444	0.148286	0.0695922	0.0606497	0.0976118	0.0905572	0.075057	0.0660152	0.0722749	0.119372	0.152459	0.11649	0.139244	0.0841981	0.0533964	0.0905572	0.150273	0.0810186	0.0616434	0.0693935	0.092147	0.0804224	0.0556817	0.0870796	0.286198	0.089961	0.128612	0.0936374	0.0733679	0.0848937	0.0683999	0.0625376	0.0617096	0.0472361	0.0753551
cg00116234	0.0726078	0.0472886	0.647375	0.678921	0.0368081	0.422408	0.577851	0.244343	0.44617	0.0611934	0.65163	0.0505054	0.615311	0.0808054	0.450529	0.0291293	0.680373	0.715551	0.219646	0.0890031	0.502931	0.097512	0.568512	0.0527883	0.569342	0.0412701	0.542363	0.625792	0.840798	0.0285067	0.372599	0.0775887	0.363572	0.488923	0.0908709	0.375401	0.0378457	0.837685	0.0473923	0.643744	0.043968	0.406635	0.0384684	0.577125	0.542363	0.427492	0.0741643	0.641564	0.722607
cg00116838	0.0870106	0.0564332	0.438602	0.0919584	0.0623705	0.644827	0.309464	0.19517	0.0602925	0.300063	0.0476261	0.0718703	0.59139	0.0602925	0.211003	0.0665267	0.0538603	0.0212048	0.0371367	0.118875	0.144009	0.0855263	0.335589	0.0541572	0.0814691	0.0920574	0.0921564	0.100568	0.038819	0.040897	0.76872	0.0663288	0.171123	0.0551467	0.486398	0.281658	0.0425793	0.0469334	0.122041	0.0490114	0.050001	0.0846357	0.0288244	0.095323	0.0625684	0.275126	0.0521451	0.0479229	0.0406991
cg00117172	0.119669	0.129167	0.034085	0.409291	0.0448631	0.780548	0.0306701	0.134076	0.655053	0.583555	0.0369663	0.30279	0.913194	0.140265	0.0471041	0.773078	0.0447564	0.0445429	0.0276822	0.536921	0.425191	0.0230935	0.662309	0.0503055	0.027362	0.552181	0.0220263	0.145494	0.639473	0.0410214	0.459873	0.0312037	0.310794	0.601056	0.682585	0.186793	0.322533	0.308766	0.17324	0.557837	0.115081	0.0269352	0.115828	0.290945	0.068767	0.576298	0.640718	0.409398	0.0344051
cg00119079	0.0339234	0.0574097	0.0386039	0.0428666	0.0488844	0.036598	0.0359294	0.032001	0.0456247	0.0439531	0.0350935	0.0474635	0.0558216	0.0316667	0.0291593	0.0346756	0.0251474	0.0517262	0.0341742	0.0465441	0.0329204	0.0357622	0.0430337	0.0345085	0.0361801	0.0371831	0.0259832	0.0592484	0.0307473	0.0394398	0.0337562	0.0410278	0.0416129	0.0349264	0.0311652	0.0289086	0.0363473	0.0526455	0.0493023	0.0257325	0.0461262	0.037601	0.0415293	0.0308309	0.0309981	0.0444546	0.0437024	0.0401084	0.0392726
cg00121158	0.0120854	0.0369054	0.0192483	0.0346567	0.0263278	0.0235793	0.0294095	0.0269108	0.0286599	0.0313251	0.028993	0.0332407	0.0237458	0.0467335	0.0241623	0.0239957	0.0202477	0.0250785	0.0182488	0.0297426	0.0348232	0.0290763	0.0287432	0.0309087	0.029576	0.0350731	0.0317416	0.0484826	0.0291596	0.0234127	0.0241623	0.0219135	0.0289097	0.020331	0.0258281	0.0279936	0.0317416	0.0257448	0.0385712	0.0205809	0.0294095	0.0340736	0.0241623	0.0235793	0.0317416	0.0256615	0.023024	0.0260779	0.0319914
cg00121640	0.0970651	0.14494	0.261207	0.279486	0.073936	0.208234	0.0996764	0.114225	0.3102	0.650421	0.0499366	0.161105	0.464145	0.125044	0.194804	0.143696	0.0478226	0.178141	0.081024	0.2147	0.0673455	0.0719464	0.319154	0.156504	0.0518018	0.232482	0.319278	0.0603819	0.20612	0.170556	0.231238	0.0525479	0.1095	0.0522992	0.172297	0.166328	0.141582	0.0690864	0.174535	0.403338	0.358821	0.099179	0.391276	0.035139	0.0503096	0.366779	0.224855	0.347008	0.375235
cg00121904	0.022383	0.0411853	0.257562	0.328649	0.0304267	0.451618	0.381436	0.159529	0.38023	0.0304267	0.0236901	0.0781866	0.150178	0.0351525	0.34715	0.0258016	0.0977932	0.0282147	0.0300246	0.0284158	0.0359568	0.0365601	0.0460115	0.0626018	0.385961	0.339609	0.0402804	0.0388727	0.0303262	0.0743658	0.156412	0.259071	0.253541	0.142738	0.397725	0.319499	0.235643	0.0377667	0.223477	0.122729	0.0305273	0.170991	0.221265	0.0362585	0.16335	0.355495	0.379995	0.445887	0.0897495
cg00123035	0.0358701	0.0688752	0.0556282	0.089756	0.0748251	0.0641602	0.0518113	0.0968285	0.057649	0.0746006	0.0769581	0.0721308	0.0541688	0.0633743	0.0461982	0.0470963	0.0468718	0.0659564	0.039687	0.053383	0.0543934	0.0870617	0.0391257	0.0766213	0.0385644	0.110075	0.0744883	0.0715695	0.055516	0.0493416	0.0522604	0.0616904	0.0428303	0.0766213	0.062813	0.055516	0.0575367	0.0611291	0.0589961	0.0600065	0.0573122	0.0802137	0.0635989	0.058098	0.0481067	0.0541688	0.0598942	0.062813	0.0558528
cg00126034	0.0416039	0.048798	0.500995	0.52196	0.0187885	0.599451	0.0224883	0.0365681	0.340054	0.628946	0.0180691	0.0988479	0.637682	0.0275241	0.387329	0.0619528	0.0440704	0.352078	0.0440704	0.381265	0.0763409	0.348173	0.593387	0.0370819	0.081685	0.53306	0.330085	0.0508534	0.0214606	0.0195079	0.586296	0.0926816	0.232657	0.207272	0.502228	0.131529	0.0205356	0.0484896	0.415283	0.0725383	0.030299	0.0409873	0.210767	0.0296824	0.0382124	0.452898	0.162567	0.00727805	0.0821989
cg00126657	0.235211	0.730341	0.304891	0.461923	0.399413	0.270556	0.747711	0.760031	0.516758	0.741955	0.718829	0.793659	0.792447	0.841728	0.334076	0.484241	0.452733	0.848595	0.346295	0.607745	0.674901	0.736401	0.602292	0.634608	0.496258	0.417187	0.467982	0.576541	0.864046	0.230465	0.095246	0.28631	0.535339	0.612189	0.536248	0.513324	0.493632	0.737309	0.36932	0.654199	0.875053	0.692371	0.371642	0.751548	0.594011	0.3981	0.16533	0.506053	0.448694
cg00126698	0.937197	0.852334	0.627777	0.728423	0.902862	0.569357	0.768702	0.84188	0.631877	0.92828	0.866683	0.779873	0.892408	0.919261	0.612198	0.898045	0.882979	0.935147	0.734265	0.87068	0.822407	0.921515	0.910139	0.908602	0.551934	0.73447	0.789302	0.865863	0.926537	0.860328	0.358944	0.752713	0.660984	0.777106	0.744206	0.618348	0.738774	0.92213	0.631569	0.788277	0.933712	0.738979	0.868425	0.887284	0.808981	0.673795	0.883184	0.70649	0.850489
cg00128197	0.0463217	0.027061	0.396516	0.32143	0.0217051	0.443071	0.377667	0.562343	0.3685	0.0377728	0.0208811	0.030254	0.185369	0.0363308	0.328228	0.0310779	0.087727	0.025001	0.0228381	0.029842	0.0354039	0.0231471	0.026443	0.0397298	0.513831	0.286617	0.0311809	0.0390088	0.0198511	0.0452917	0.112241	0.377049	0.204012	0.206793	0.414643	0.162195	0.244902	0.027988	0.268592	0.183309	0.0340649	0.027164	0.0961728	0.0371548	0.199274	0.368912	0.418763	0.485918	0.15859
cg00128560	0.888657	0.946027	0.954566	0.927625	0.907059	0.943501	0.951199	0.926783	0.943621	0.959137	0.949635	0.95192	0.949034	0.936044	0.961903	0.944824	0.945065	0.942298	0.917522	0.945305	0.946989	0.940133	0.934841	0.947951	0.953123	0.952161	0.950717	0.953484	0.953003	0.917643	0.948673	0.949394	0.96082	0.876269	0.852214	0.945425	0.95168	0.935563	0.94735	0.944944	0.925701	0.947109	0.940975	0.941216	0.957212	0.950357	0.925581	0.935082	0.939893
cg00128654	0.173698	0.0399046	0.0476548	0.0530392	0.0366413	0.0461864	0.0470837	0.0512444	0.0415362	0.0986432	0.0291358	0.0552419	0.0527944	0.0973379	0.0355808	0.0481443	0.055405	0.0407204	0.051897	0.0376203	0.0625842	0.0449626	0.0361518	0.0464311	0.0399046	0.0416994	0.0325623	0.0615236	0.02677	0.0447179	0.0328886	0.056384	0.0363966	0.0510812	0.0466758	0.0428415	0.0507549	0.0323175	0.0637263	0.0474101	0.0520602	0.041781	0.0409651	0.0467574	0.0383545	0.0325623	0.0565744	0.0526313	0.0519786
cg00128877	0.0278548	0.0801836	0.0385769	0.0919547	0.0560587	0.0441711	0.0654989	0.0368288	0.106989	0.0896238	0.059322	0.0803001	0.0224937	0.0448704	0.0737736	0.04522	0.027039	0.0441711	0.0333324	0.0959172	0.10594	0.0603709	0.0553595	0.101162	0.0996467	0.103376	0.0396258	0.102211	0.0607205	0.072142	0.0720254	0.0525624	0.073424	0.0299526	0.0475509	0.0792512	0.0653824	0.107572	0.0796009	0.0277382	0.0614198	0.145099	0.0414906	0.0318173	0.0575738	0.092887	0.0295252	0.0181815	0.0851951
cg00129774	0.0281876	0.0308862	0.0294063	0.0297545	0.0297545	0.0278394	0.0264465	0.0341941	0.0434216	0.0419417	0.0303639	0.0363704	0.0258372	0.0296674	0.0227904	0.0264465	0.0293192	0.0321919	0.0276653	0.0320178	0.0361092	0.0334106	0.0193954	0.0387208	0.0274041	0.0368927	0.0363704	0.037415	0.0203529	0.0231386	0.02044	0.023835	0.0251408	0.0190472	0.0278394	0.0266206	0.0307121	0.0287099	0.0378503	0.0260983	0.0367186	0.0312344	0.0256631	0.0276653	0.0235738	0.0331495	0.0313214	0.039156	0.0378503
cg00131557	0.908508	0.933798	0.955117	0.95125	0.945294	0.947593	0.942263	0.962328	0.903492	0.939337	0.936202	0.950414	0.942681	0.953132	0.943517	0.927946	0.929618	0.959297	0.883427	0.940382	0.926901	0.950519	0.944144	0.932649	0.944249	0.92502	0.910807	0.943204	0.941636	0.903387	0.927841	0.955117	0.927005	0.920631	0.929722	0.961596	0.764291	0.915092	0.945085	0.916137	0.912166	0.952087	0.935052	0.91645	0.939441	0.928573	0.93453	0.923348	0.939859
cg00132141	0.0913811	0.471031	0.267305	0.310785	0.598462	0.195659	0.333755	0.739293	0.424999	0.610312	0.258372	0.616328	0.70192	0.0637619	0.0999494	0.446602	0.513235	0.119	0.223917	0.445053	0.548784	0.362651	0.112984	0.204775	0.531374	0.227563	0.25582	0.348887	0.527181	0.241874	0.109247	0.455444	0.472672	0.166673	0.309965	0.451433	0.353444	0.0985821	0.37523	0.492087	0.313793	0.369761	0.511412	0.121826	0.277059	0.388629	0.134283	0.389723	0.463283
cg00133909	0.0394377	0.0758604	0.0837429	0.0652598	0.055384	0.0301962	0.0677061	0.0704242	0.0592799	0.0545686	0.0826557	0.120709	0.29648	0.0311022	0.0700618	0.0421559	0.0622699	0.0421559	0.0540249	0.0552028	0.0641725	0.0291995	0.060186	0.0786691	0.0392565	0.0555652	0.0301056	0.0648068	0.0473203	0.0603672	0.0451458	0.0625417	0.060639	0.0547498	0.0372633	0.0491323	0.055384	0.0604578	0.0804812	0.0370821	0.0426089	0.0794846	0.0269344	0.0319176	0.0370821	0.0720551	0.0928939	0.0296526	0.0642631
cg00134539	0.904813	0.786135	0.84592	0.89357	0.897853	0.900441	0.878758	0.924712	0.883933	0.885182	0.848329	0.646397	0.906955	0.949073	0.873671	0.863588	0.90401	0.954873	0.827806	0.861179	0.765076	0.942291	0.903386	0.881613	0.916414	0.85172	0.814957	0.900084	0.890626	0.939882	0.925694	0.885896	0.78435	0.892232	0.787027	0.804784	0.9041	0.836908	0.880632	0.865373	0.946485	0.779264	0.875278	0.883309	0.893124	0.777836	0.833011	0.94943	0.919358
cg00134787	0.224377	0.573138	0.423297	0.359777	0.360972	0.418193	0.906914	0.859464	0.690404	0.783675	0.613964	0.7359	0.89421	0.613747	0.384425	0.861961	0.55381	0.905828	0.406575	0.838942	0.422211	0.186157	0.437521	0.493983	0.861961	0.470203	0.301252	0.543387	0.85599	0.814838	0.124266	0.530248	0.773251	0.288331	0.292023	0.70908	0.297126	0.556633	0.613638	0.714401	0.811363	0.82385	0.47661	0.731882	0.659893	0.78867	0.208561	0.875643	0.44599
cg00135056	0.0566655	0.0994218	0.0881312	0.146805	0.0966454	0.0810977	0.0988665	0.0673083	0.112193	0.0942392	0.103494	0.181973	0.133479	0.0666605	0.0790616	0.0545369	0.0590717	0.0706399	0.073694	0.11062	0.117376	0.0781362	0.0801722	0.111916	0.0764703	0.0937765	0.0903523	0.109787	0.0698996	0.0675859	0.0692517	0.08082	0.112101	0.0832262	0.164297	0.100162	0.0721207	0.0880386	0.110527	0.0645319	0.0788765	0.114229	0.0704548	0.0693443	0.0763778	0.128204	0.069005	0.0829486	0.109232
cg00136105	0.0607322	0.024233	0.0266776	0.0437892	0.0223786	0.0283634	0.0238116	0.0269304	0.0273519	0.0275205	0.0248231	0.0265933	0.0238116	0.0409232	0.0174052	0.0356127	0.0319038	0.032831	0.0336739	0.0249917	0.0214513	0.024233	0.0252446	0.0240645	0.0286163	0.0260875	0.0369614	0.0351069	0.0222943	0.024233	0.0259189	0.0469924	0.0260032	0.0410075	0.025076	0.0235587	0.0226315	0.0235587	0.0305551	0.0346855	0.0227158	0.0238959	0.0348541	0.0378043	0.0209456	0.0238116	0.0365961	0.026509	0.0245702
cg00136405	0.519898	0.509146	0.500854	0.246723	0.35397	0.212644	0.293922	0.652294	0.293558	0.495114	0.459577	0.508235	0.343036	0.291736	0.220571	0.38732	0.217838	0.29128	0.176561	0.548327	0.441353	0.0741427	0.103119	0.24162	0.0796099	0.289458	0.20417	0.285539	0.134373	0.0993828	0.101843	0.454566	0.583499	0.167631	0.76674	0.503861	0.162711	0.25219	0.328639	0.263853	0.0285831	0.556346	0.243078	0.168907	0.355975	0.47279	0.155694	0.226859	0.219934
cg00136477	0.291368	0.471154	0.361995	0.382334	0.441206	0.360502	0.638625	0.59151	0.497838	0.327755	0.455107	0.551111	0.327102	0.856197	0.305923	0.309748	0.367966	0.370485	0.327195	0.473674	0.352945	0.459772	0.304897	0.35845	0.513885	0.35705	0.320197	0.461078	0.771109	0.250504	0.253862	0.47498	0.556896	0.284651	0.351546	0.46537	0.353692	0.357983	0.456693	0.417135	0.574529	0.453988	0.495039	0.296406	0.472461	0.386533	0.260207	0.504089	0.371325
cg00138126	0.345872	0.714886	0.370042	0.566475	0.467887	0.534672	0.781989	0.615981	0.560644	0.6128	0.663578	0.570609	0.743614	0.776477	0.50499	0.611846	0.610362	0.756653	0.529902	0.727713	0.68531	0.793014	0.561598	0.65796	0.705451	0.560114	0.609408	0.706936	0.781777	0.744993	0.646617	0.668031	0.722307	0.524284	0.746901	0.670363	0.429724	0.546651	0.762908	0.740752	0.785382	0.626687	0.549726	0.731317	0.538171	0.609302	0.510326	0.619373	0.692731
cg00141162	0.761167	0.50599	0.606498	0.601874	0.665944	0.692034	0.666494	0.741792	0.589435	0.768653	0.585141	0.414179	0.607489	0.850446	0.772066	0.618717	0.702052	0.784395	0.689392	0.547933	0.520521	0.761167	0.787037	0.667155	0.785056	0.619158	0.601984	0.645027	0.798046	0.719555	0.763259	0.645908	0.469002	0.636771	0.498064	0.522613	0.71251	0.614204	0.624221	0.653064	0.831071	0.408565	0.667375	0.705024	0.705574	0.563675	0.626166	0.651963	0.658898
cg00141845	0.0395002	0.143017	0.172142	0.214848	0.117224	0.396088	0.436487	0.19563	0.18615	0.0640983	0.0756287	0.132768	0.242606	0.0559844	0.0652941	0.11227	0.102362	0.0520555	0.0624756	0.117394	0.225438	0.0440269	0.0487245	0.0816075	0.0495786	0.276087	0.0488953	0.100056	0.0360838	0.100483	0.11022	0.418722	0.369867	0.10185	0.480474	0.323489	0.131316	0.0666607	0.236542	0.22057	0.0455643	0.140199	0.100996	0.110305	0.208869	0.340486	0.123373	0.29556	0.140284
cg00143376	0.357686	0.427197	0.47444	0.272982	0.217415	0.707947	0.575064	0.496396	0.394939	0.517728	0.306801	0.524908	0.62137	0.351962	0.612525	0.182659	0.168923	0.520017	0.294418	0.378289	0.316166	0.293377	0.387134	0.284845	0.662161	0.443222	0.374855	0.408674	0.488904	0.32241	0.455605	0.495668	0.466115	0.407426	0.669341	0.527614	0.177248	0.246759	0.381931	0.566011	0.630424	0.398685	0.161535	0.323867	0.362785	0.441141	0.333024	0.395979	0.236561
cg00143998	0.0560101	0.032105	0.0462129	0.28879	0.0325949	0.277915	0.0309294	0.0318111	0.230105	0.0510135	0.0418042	0.0443515	0.0265207	0.0667869	0.285165	0.0469967	0.0212302	0.03573	0.032301	0.0276963	0.0352401	0.0335746	0.0306355	0.0492501	0.0342604	0.0419022	0.028676	0.0557162	0.025443	0.0181931	0.0275004	0.0314192	0.0407265	0.0350442	0.0376894	0.0360239	0.0422941	0.297804	0.0858914	0.0304395	0.0342604	0.0622803	0.0374935	0.205221	0.025345	0.0541486	0.0484663	0.0809928	0.0399428
cg00145118	0.085635	0.338905	0.154506	0.231288	0.299043	0.340832	0.180675	0.184022	0.266788	0.124888	0.222362	0.416296	0.293363	0.0360359	0.116571	0.236258	0.103994	0.0782306	0.166677	0.259384	0.372073	0.082085	0.39814	0.145681	0.0854321	0.137466	0.193353	0.538214	0.179762	0.337485	0.621184	0.192441	0.309592	0.123874	0.245995	0.324299	0.114745	0.158259	0.285249	0.297725	0.198932	0.302593	0.149231	0.127627	0.159882	0.390228	0.0767768	0.101762	0.199642
cg00145348	0.0271697	0.0314187	0.448033	0.477449	0.0322903	0.581712	0.483877	0.29311	0.449232	0.0396987	0.034905	0.0422045	0.132522	0.0558229	0.369809	0.0405703	0.158124	0.0367571	0.0438387	0.0392629	0.0414419	0.0327261	0.0383913	0.0341424	0.513511	0.404128	0.0367571	0.0399166	0.0255355	0.147448	0.467099	0.571906	0.360113	0.249749	0.499565	0.499892	0.40489	0.0365392	0.484749	0.263694	0.0400255	0.0325082	0.439753	0.0405703	0.319367	0.434633	0.401585	0.386696	0.244847
cg00146096	0.0205692	0.0143895	0.0192619	0.0183112	0.0135576	0.0135576	0.0132011	0.0143895	0.0202126	0.0173605	0.0146271	0.0134387	0.0123692	0.0178358	0.0121315	0.0137953	0.0130822	0.0139141	0.0148648	0.0160532	0.0253228	0.0133199	0.0140329	0.0181924	0.0165286	0.0203315	0.0142706	0.0158156	0.00939817	0.0158156	0.0129634	0.0133199	0.0121315	0.0164098	0.0205692	0.0132011	0.017004	0.0196184	0.0168851	0.0148648	0.0171228	0.0173605	0.0161721	0.0175982	0.011775	0.015459	0.0175189	0.015459	0.0165286
cg00149659	0.0196561	0.18952	0.0278845	0.0319579	0.0240554	0.0590872	0.0284548	0.0273957	0.0358685	0.0518364	0.0386384	0.039779	0.0312247	0.029025	0.0202264	0.0418157	0.0337503	0.0553396	0.0346464	0.0390458	0.0260921	0.0295139	0.0263366	0.0329356	0.0318765	0.0298397	0.0254404	0.0389643	0.0220187	0.0242184	0.0298397	0.0312247	0.0225075	0.0348094	0.0303286	0.0361129	0.0262551	0.037009	0.043771	0.023811	0.0363573	0.037172	0.0335873	0.0352982	0.0279659	0.0379867	0.161046	0.0299212	0.0298397
cg00149976	0.0280536	0.036239	0.0273921	0.0407865	0.0235061	0.0329318	0.0339239	0.0312781	0.0388848	0.0501294	0.028715	0.0464088	0.0246637	0.0288804	0.0328491	0.0317742	0.0434322	0.0326837	0.040373	0.0249944	0.0466568	0.0373139	0.0381407	0.043763	0.0431842	0.0395462	0.0330971	0.0454993	0.0369831	0.0316916	0.0390502	0.0199509	0.0376446	0.0439283	0.0703862	0.0281363	0.0340066	0.0402077	0.0314435	0.0395462	0.0391328	0.0311955	0.0349161	0.0465741	0.0408691	0.0442591	0.0302584	0.0252424	0.0583148
cg00151234	0.0478929	0.0320226	0.393281	0.455196	0.0320226	0.559501	0.438386	0.271017	0.405392	0.0343197	0.0281595	0.0323359	0.280205	0.0325447	0.474616	0.0388093	0.193649	0.0336932	0.0389137	0.0295168	0.0398534	0.0272198	0.0324403	0.0343197	0.477853	0.380438	0.035677	0.0426724	0.0192846	0.0984273	0.439534	0.494976	0.40748	0.255982	0.542169	0.467098	0.321551	0.052487	0.451855	0.262351	0.0337976	0.0296212	0.282502	0.0395401	0.280622	0.416773	0.513665	0.417295	0.240111
cg00151607	0.0327513	0.012366	0.0142875	0.0134521	0.0121153	0.0141204	0.0128672	0.0170446	0.0174623	0.0147053	0.0137863	0.0126166	0.0133685	0.0189661	0.0117811	0.012366	0.0161256	0.0113634	0.0127001	0.0105279	0.0168775	0.0197181	0.0113634	0.0158749	0.011447	0.0208042	0.0126166	0.0131179	0.00868992	0.00994311	0.0110292	0.018632	0.011614	0.012366	0.0157914	0.0162091	0.011614	0.0155407	0.0111128	0.0136192	0.0142875	0.0103608	0.0121153	0.0143711	0.0117811	0.0111963	0.0216675	0.0127001	0.0137027
cg00155167	0.0254891	0.0398086	0.0298435	0.0437443	0.0459216	0.042237	0.0414834	0.0605761	0.0532907	0.0527045	0.0907224	0.050611	0.0453354	0.0334443	0.0407297	0.0292574	0.0377988	0.0412322	0.0542956	0.0403948	0.0603248	0.0398923	0.03872	0.040311	0.0330256	0.0436606	0.0197947	0.0444143	0.0268289	0.0306809	0.0205484	0.0658517	0.0393061	0.0395574	0.0421533	0.0500248	0.0331931	0.0439956	0.030011	0.033863	0.0585663	0.0449167	0.0291736	0.0378826	0.0371289	0.046424	0.053849	0.0341143	0.0728021
cg00155485	0.0290213	0.0202545	0.0341021	0.0217488	0.0163692	0.0199556	0.0187601	0.0211511	0.0246379	0.0230439	0.0184613	0.0202545	0.0155722	0.0246379	0.0167677	0.0232432	0.0188598	0.0223466	0.0179631	0.0205534	0.0260326	0.0195571	0.0208522	0.0326078	0.0257338	0.027527	0.0199556	0.0222469	0.018262	0.0204537	0.0168673	0.0187601	0.0189594	0.024339	0.0185609	0.0187601	0.0171662	0.0304161	0.0216492	0.0213503	0.0185609	0.0186605	0.019856	0.0217488	0.0167677	0.0212507	0.0212839	0.0218485	0.0253353
cg00155609	0.0424624	0.0405342	0.0419268	0.0321788	0.0379633	0.0399986	0.0209312	0.0464259	0.0374277	0.0863818	0.0217881	0.0685998	0.0300364	0.0361423	0.0718134	0.0432122	0.0342141	0.0290723	0.0335714	0.078562	0.0519961	0.0297151	0.0255374	0.0470686	0.0272513	0.0346426	0.0541385	0.0321788	0.0224309	0.0280011	0.0323931	0.0203956	0.0242519	0.0275726	0.0274655	0.0558525	0.03325	0.0482469	0.050068	0.0426766	0.0215739	0.0301435	0.0194315	0.0458903	0.0391417	0.0335714	0.0426766	0.0297151	0.0439621
cg00156216	0.0207014	0.0165255	0.0218497	0.0189266	0.0132892	0.020597	0.0151684	0.020597	0.0208058	0.0165255	0.0175695	0.0162123	0.019553	0.0168387	0.0130804	0.0197618	0.0193442	0.0160035	0.0187178	0.0204926	0.0167343	0.0181959	0.0147508	0.020597	0.0143332	0.0244596	0.0203882	0.0173607	0.0132892	0.0184047	0.0144376	0.0130804	0.0142288	0.0242509	0.0212234	0.0174651	0.0178827	0.0178827	0.0164211	0.0162123	0.0184047	0.0168387	0.0226849	0.0262344	0.0163167	0.0151684	0.0272784	0.0170475	0.0238333
cg00156744	0.050746	0.0232643	0.0308388	0.0358884	0.0269544	0.0288966	0.0316156	0.0362768	0.0379277	0.0251094	0.0400641	0.0408409	0.0182147	0.0269544	0.0243325	0.0352086	0.040938	0.0437542	0.0551159	0.0249151	0.0364711	0.0269544	0.0361797	0.0466674	0.0271486	0.0300619	0.0398699	0.0366653	0.0179233	0.0350144	0.0628846	0.0150101	0.0263718	0.0430744	0.0234585	0.0207395	0.0199626	0.0294792	0.0398699	0.0586118	0.0363739	0.0323925	0.0250122	0.0509402	0.031033	0.0313243	0.0794254	0.0352086	0.0392872
cg00158308	0.0683991	0.0773438	0.0853162	0.0740382	0.0409818	0.1244	0.0502181	0.117109	0.146957	0.248848	0.0543016	0.110108	0.628121	0.119248	0.0260092	0.0325232	0.0636351	0.103303	0.0452597	0.0516765	0.072677	0.0637323	0.0507042	0.0418568	0.0241619	0.0672324	0.348989	0.308155	0.452436	0.0242592	0.662928	0.0697603	0.0694686	0.148123	0.040204	0.090858	0.368143	0.0615934	0.0573155	0.0635379	0.0153145	0.0666491	0.582231	0.113706	0.0543016	0.14404	0.0857375	0.0581905	0.0700519
cg00160914	0.101953	0.0967303	0.079504	0.0828943	0.118904	0.109283	0.11643	0.129625	0.06915	0.17324	0.175531	0.213557	0.0653015	0.0510991	0.0551307	0.103419	0.055314	0.0453264	0.0434022	0.175989	0.110016	0.0721737	0.159771	0.0657597	0.057788	0.078771	0.07703	0.114231	0.0620945	0.0586126	0.0618197	0.163619	0.170583	0.0712574	0.200179	0.162886	0.109283	0.0477088	0.12541	0.168567	0.0929735	0.140162	0.0663095	0.0746477	0.0945312	0.114415	0.0424249	0.0736398	0.0739147
cg00162401	0.0445527	0.0534896	0.0351597	0.0444615	0.0368924	0.0264964	0.0316944	0.0921556	0.0318768	0.0325151	0.0290498	0.026314	0.0303265	0.0347038	0.0228486	0.0284114	0.029597	0.02677	0.0257668	0.0278643	0.0477444	0.0299617	0.0197481	0.0439143	0.0403578	0.0304177	0.0259492	0.0510274	0.0222103	0.0378955	0.0335183	0.0299617	0.0473797	0.0272259	0.0439143	0.0237606	0.0256756	0.0483828	0.0528513	0.0240342	0.0271347	0.0362541	0.0327887	0.0339742	0.0261316	0.0293234	0.0363757	0.0284114	0.0513922
cg00162643	0.350793	0.0310176	0.0259229	0.0421409	0.0226114	0.024904	0.0321214	0.0342442	0.0284702	0.0340744	0.0253285	0.0311025	0.0306779	0.0450279	0.0230359	0.0279608	0.0284702	0.0254134	0.0285551	0.0259229	0.0290646	0.0304232	0.0288099	0.0289797	0.0243096	0.0297439	0.0328856	0.0284702	0.0221868	0.0230359	0.025838	0.0412918	0.0209131	0.0431598	0.0491036	0.0300835	0.0234605	0.0323761	0.0295741	0.0306779	0.028725	0.0309327	0.0253285	0.0322912	0.0222717	0.0249889	0.0304232	0.0279608	0.0316119
cg00164898	0.0761477	0.0367669	0.0399043	0.106441	0.031682	0.0387143	0.0202139	0.0146963	0.0298427	0.115204	0.0272462	0.0327639	0.0553754	0.0529952	0.0241087	0.130891	0.0342785	0.0224859	0.0267053	0.0333048	0.0262725	0.0167519	0.0218368	0.0343867	0.0509396	0.0383897	0.045422	0.0435828	0.0130734	0.0144799	0.0329802	0.0103687	0.0180501	0.0578637	0.0588374	0.048884	0.0230268	0.0656533	0.0336294	0.0387143	0.031682	0.0407698	0.0178338	0.0533198	0.0215122	0.0278953	0.0319705	0.0207549	0.047694
cg00165981	0.0698284	0.0812099	0.0746944	0.0849213	0.0479727	0.0912718	0.0912718	0.089045	0.11354	0.0629006	0.0812099	0.0847564	0.0533335	0.0610861	0.037251	0.0796429	0.0692511	0.0807976	0.155685	0.0628181	0.0678491	0.0576222	0.0723027	0.0944884	0.0673542	0.0676016	0.0678491	0.0852512	0.0657872	0.098942	0.0649624	0.119643	0.0547356	0.0976224	0.0623233	0.0674367	0.0772512	0.113293	0.0733749	0.0902821	0.076179	0.0581995	0.0653748	0.0667769	0.0691687	0.0546531	0.0837941	0.0362613	0.0691687
cg00167504	0.0413386	0.0333998	0.0393178	0.0502877	0.0316677	0.031379	0.0238733	0.0452358	0.0400395	0.043648	0.018677	0.0844966	0.0394621	0.0266158	0.0180996	0.0403282	0.0312347	0.0332555	0.0361423	0.0315234	0.0398952	0.042782	0.0450914	0.0580821	0.0452358	0.0505764	0.0589482	0.067753	0.0318121	0.0476896	0.0212752	0.0224299	0.0316677	0.0365753	0.0671756	0.0204091	0.0487	0.0426376	0.0588038	0.0435037	0.0263271	0.036431	0.0287809	0.0318121	0.0406169	0.0394621	0.0373932	0.0211308	0.0404725
cg00168082	0.0376249	0.0326055	0.0389507	0.0557135	0.036299	0.0303326	0.0516412	0.0279649	0.0481371	0.0565658	0.0432124	0.0428336	0.0399925	0.0440648	0.0297643	0.0445383	0.040466	0.0463377	0.0363937	0.0463377	0.0550506	0.0352572	0.0438754	0.0366778	0.0341208	0.049463	0.0427389	0.05524	0.0317531	0.0277755	0.0463377	0.0618693	0.0380984	0.0523988	0.0570394	0.0386666	0.0534406	0.0416025	0.0531565	0.032132	0.0359202	0.0441595	0.0401819	0.0414131	0.0470006	0.0440648	0.0502206	0.0348784	0.0375301
cg00168785	0.0227468	0.136314	0.0506612	0.098852	0.0690282	0.0526615	0.0925781	0.0464786	0.0658458	0.0571169	0.0949422	0.180504	0.0552984	0.0290207	0.0749384	0.0509339	0.0377496	0.0307483	0.0888501	0.0652093	0.148498	0.0480243	0.0405684	0.0784845	0.0352037	0.0610267	0.0961242	0.0804849	0.0698466	0.0382043	0.0354765	0.100216	0.115037	0.0457511	0.0765751	0.0778481	0.0581171	0.0506612	0.0873044	0.0588445	0.0292026	0.157408	0.0366585	0.0455693	0.0711195	0.0743019	0.0536314	0.0389317	0.0831218
cg00168942	0.771226	0.576166	0.289007	0.818351	0.313389	0.566126	0.776143	0.700537	0.594914	0.543486	0.657202	0.679535	0.585182	0.237681	0.30171	0.464294	0.535187	0.72912	0.518488	0.6906	0.373628	0.86435	0.239422	0.475461	0.583133	0.560799	0.360105	0.522586	0.900411	0.837611	0.174266	0.476075	0.644601	0.661197	0.534573	0.524021	0.443804	0.352729	0.447185	0.647982	0.845295	0.554755	0.698795	0.541641	0.424749	0.550145	0.188779	0.581801	0.538671
cg00171126	0.238428	0.0387381	0.0374116	0.0447518	0.0442212	0.0418334	0.0355544	0.0391803	0.036085	0.0407722	0.0488199	0.0399762	0.032636	0.0474934	0.0282142	0.0274182	0.0416565	0.0422756	0.0350238	0.0299829	0.0378538	0.0308673	0.0306904	0.035466	0.0352891	0.03467	0.0440443	0.0359082	0.0328129	0.0426293	0.0453709	0.0336088	0.0316632	0.0382075	0.0336972	0.0325476	0.0355544	0.0351122	0.0352891	0.0303367	0.0375	0.0359082	0.024323	0.0267108	0.0343163	0.031221	0.0499696	0.0375	0.0372347
cg00171161	0.0893987	0.0670617	0.0412569	0.0643078	0.0689996	0.0558422	0.0564542	0.0582901	0.0685917	0.0714475	0.0576781	0.0681837	0.0447247	0.061452	0.0553322	0.0424808	0.0420728	0.0660418	0.0331992	0.0640019	0.0876648	0.0503345	0.0656338	0.082973	0.0667557	0.0630839	0.0412569	0.0625739	0.0329952	0.0676737	0.0780772	0.0552302	0.0529863	0.0526804	0.0619619	0.0748134	0.060432	0.0733854	0.0820551	0.0594121	0.0551282	0.0619619	0.0458467	0.0556382	0.0596161	0.0462546	0.0528163	0.0367691	0.0551282
cg00174500	0.718987	0.564106	0.397276	0.352863	0.654848	0.410126	0.764189	0.786057	0.505941	0.69757	0.701741	0.575716	0.722256	0.75427	0.24138	0.436729	0.336969	0.578534	0.354328	0.489145	0.565458	0.776025	0.603672	0.515635	0.786959	0.337871	0.317017	0.467164	0.854931	0.447776	0.137787	0.49061	0.475055	0.479	0.747393	0.50301	0.479563	0.488356	0.485876	0.721693	0.673334	0.643012	0.658117	0.306759	0.486327	0.622271	0.179795	0.654735	0.392316
cg00174901	0.435007	0.493569	0.335992	0.292882	0.121526	0.701933	0.426444	0.626737	0.408826	0.643567	0.435302	0.358137	0.771125	0.583135	0.671716	0.339732	0.0856994	0.472506	0.094656	0.405775	0.195541	0.418274	0.661579	0.346425	0.575753	0.67152	0.46729	0.372606	0.4916	0.299477	0.706067	0.31552	0.326445	0.679984	0.636678	0.314339	0.315028	0.1419	0.40292	0.478313	0.487171	0.535694	0.354496	0.225658	0.353019	0.536875	0.438517	0.599473	0.283729
cg00176210	0.586125	0.404887	0.232305	0.314049	0.469427	0.740847	0.661842	0.415187	0.341442	0.486083	0.621957	0.425487	0.663815	0.225182	0.833438	0.472057	0.31624	0.301557	0.403791	0.570347	0.324787	0.581195	0.463291	0.25948	0.780732	0.609027	0.645406	0.416612	0.173353	0.229127	0.663705	0.289065	0.558184	0.595768	0.698879	0.543391	0.34736	0.240633	0.488712	0.635654	0.529584	0.406859	0.229675	0.199103	0.338813	0.550732	0.246988	0.274492	0.437869
cg00176879	0.960256	0.939933	0.925138	0.920098	0.944648	0.935543	0.939526	0.949606	0.8636	0.939851	0.915545	0.91457	0.908717	0.957329	0.922211	0.905628	0.922292	0.943997	0.873192	0.909367	0.896848	0.91587	0.863925	0.895304	0.93977	0.904652	0.870428	0.925382	0.948631	0.916927	0.926926	0.908961	0.916683	0.876281	0.938795	0.925788	0.87051	0.870672	0.925869	0.881565	0.926763	0.895222	0.910749	0.904327	0.874249	0.906034	0.925056	0.903514	0.928471
cg00177013	0.0559296	0.0840108	0.0437864	0.100166	0.0321853	0.0321853	0.0664465	0.0394495	0.076096	0.109815	0.0700244	0.0985393	0.0473643	0.0505085	0.0586401	0.0351126	0.0447622	0.0598328	0.0450874	0.0752286	0.0829266	0.0437864	0.0647117	0.0874803	0.0835771	0.071976	0.0350042	0.092034	0.0745781	0.0992982	0.0564717	0.0589654	0.0653623	0.0463885	0.0461716	0.0706749	0.0947445	0.0974551	0.10537	0.0448706	0.0347874	0.087155	0.0321853	0.0444369	0.065796	0.0564717	0.0649647	0.0512675	0.0883476
cg00177698	0.0306722	0.0379347	0.0288988	0.0413126	0.0257742	0.0417348	0.0399614	0.0379347	0.0288143	0.0343034	0.0283077	0.0309255	0.0316856	0.0378502	0.0235786	0.0328678	0.0384414	0.0353168	0.0316856	0.0321078	0.0690959	0.0331212	0.0272098	0.0333745	0.0360768	0.0367524	0.025352	0.038188	0.03101	0.0268721	0.0401303	0.0269565	0.0437616	0.0351479	0.034979	0.0282232	0.0312633	0.038188	0.0383569	0.0270409	0.034979	0.0355702	0.0210452	0.0303344	0.0286455	0.0265343	0.0370621	0.0361613	0.0337123
cg00177923	0.0382086	0.0397805	0.033493	0.0400286	0.0208355	0.0502043	0.0292739	0.0214973	0.0335758	0.0381259	0.0153754	0.0334103	0.0343203	0.0291911	0.0248065	0.0300184	0.0218282	0.0266265	0.0363886	0.0361404	0.0362231	0.0244756	0.0272056	0.0435033	0.0219937	0.0357267	0.0224901	0.0344031	0.0268747	0.0192636	0.0314248	0.0265438	0.0322521	0.0331621	0.0430069	0.0340721	0.023731	0.0282811	0.0406077	0.0177745	0.0261302	0.031673	0.024641	0.0248892	0.0218282	0.0223246	0.0348167	0.0326658	0.0344031
cg00179446	0.041044	0.0549409	0.249879	0.357247	0.0435188	0.439772	0.562465	0.30699	0.453764	0.0458032	0.0449465	0.0507528	0.296234	0.0765478	0.315652	0.0655064	0.213138	0.0387595	0.0527517	0.0408536	0.0913966	0.0330485	0.0439947	0.0531324	0.176968	0.356581	0.0549409	0.0474213	0.0272422	0.0786419	0.309941	0.374381	0.422068	0.158787	0.578456	0.396083	0.272723	0.0853048	0.350775	0.269963	0.0547505	0.0547505	0.280528	0.0725501	0.306419	0.448529	0.352298	0.171542	0.250165
cg00180012	0.0788866	0.0369986	0.0504232	0.026208	0.0426913	0.046005	0.040992	0.0708999	0.0686908	0.0441357	0.0423514	0.063083	0.0416717	0.0365738	0.0330902	0.0371685	0.0296066	0.0382731	0.0351294	0.0432011	0.0539917	0.0539917	0.0321556	0.0561159	0.0439658	0.0398025	0.0323255	0.043541	0.0319007	0.026208	0.0216198	0.0229793	0.038443	0.0382731	0.0449854	0.0380182	0.0337699	0.0478742	0.0432861	0.0390378	0.0358941	0.0378483	0.0429462	0.0392077	0.040907	0.0352993	0.0593729	0.0398874	0.05824
cg00180631	0.0951469	0.236847	0.357476	0.440699	0.156621	0.57573	0.566257	0.279377	0.517252	0.166384	0.159231	0.259949	0.31746	0.112739	0.454811	0.153238	0.205434	0.124241	0.162517	0.295519	0.269614	0.0748488	0.161937	0.120858	0.584525	0.419724	0.473659	0.167737	0.0708858	0.153528	0.535617	0.549922	0.455004	0.299385	0.705058	0.505846	0.323066	0.144539	0.483131	0.260818	0.0822914	0.28247	0.333795	0.105103	0.332732	0.509229	0.478782	0.404355	0.238684
cg00183916	0.0248449	0.0279053	0.0653436	0.118696	0.0317817	0.750148	0.0311697	0.0489197	0.0321898	0.41759	0.0287214	0.476757	0.795747	0.060447	0.0223967	0.0301496	0.0311697	0.0376984	0.0399427	0.0328019	0.0483076	0.0268852	0.0395346	0.0368823	0.0328019	0.249271	0.461353	0.0364743	0.025151	0.033924	0.517663	0.0367803	0.025049	0.03423	0.0203564	0.0349441	0.025151	0.0394326	0.0348421	0.0298435	0.0354542	0.042391	0.0415749	0.0287214	0.0245389	0.436156	0.0504499	0.0394326	0.0438191
cg00184884	0.0326104	0.0220717	0.0212007	0.026862	0.0208523	0.0178039	0.0225943	0.0224201	0.0272104	0.0225072	0.0156265	0.0226814	0.0174555	0.0218975	0.0158007	0.0164104	0.0194588	0.025904	0.021462	0.0209394	0.025033	0.0180652	0.0193717	0.0248588	0.0242491	0.0213749	0.0150168	0.025991	0.0177168	0.0166717	0.0185878	0.0211136	0.0169329	0.0158007	0.018762	0.0168458	0.0168458	0.0245975	0.0209394	0.0208523	0.0240749	0.025991	0.0171071	0.0189362	0.0169329	0.0182394	0.0245975	0.0152781	0.0235523
cg00184893	0.0588342	0.0456798	0.0275416	0.0383265	0.0247636	0.0281952	0.0214955	0.0171652	0.0367741	0.0336694	0.0215772	0.0427385	0.0360388	0.0227211	0.0272148	0.0381631	0.029911	0.0235381	0.0516442	0.0484578	0.028522	0.0291757	0.0216589	0.0981337	0.0277867	0.027705	0.0315451	0.0227211	0.026316	0.0121812	0.0235381	0.0220674	0.032117	0.0305646	0.033506	0.0356303	0.0206785	0.0297476	0.13008	0.0223942	0.0281135	0.0469054	0.0161847	0.0224759	0.0321987	0.0313	0.0311638	0.0224759	0.0223125
cg00185839	0.0218648	0.0261619	0.022008	0.0444962	0.0263051	0.0230107	0.0285969	0.0178541	0.029886	0.0389099	0.0313184	0.0320346	0.0202892	0.0443529	0.016565	0.024443	0.0323211	0.0386235	0.0178541	0.0212918	0.0264483	0.049223	0.0251592	0.0320346	0.0253025	0.0307454	0.0182839	0.0333237	0.0188568	0.0182839	0.0167083	0.0128409	0.0235836	0.0278807	0.0447826	0.0221512	0.0218648	0.0417747	0.0370479	0.0161353	0.0221512	0.0251592	0.022008	0.0310319	0.0157056	0.0182839	0.0253025	0.016565	0.0232971
cg00186141	0.0715561	0.0311835	0.0216409	0.0411339	0.0304495	0.0247402	0.0269424	0.0283289	0.0753079	0.0300417	0.0344459	0.0442332	0.0263714	0.0322438	0.0360772	0.0403183	0.0263714	0.0243324	0.0226196	0.0469247	0.0522262	0.0306942	0.033141	0.0448857	0.0271055	0.0437439	0.0436623	0.0566305	0.0329779	0.0248218	0.047251	0.0217225	0.0388502	0.0312651	0.0424389	0.0361587	0.0267792	0.0391765	0.0423573	0.0379531	0.0381162	0.0388502	0.0301232	0.0292261	0.0350984	0.0424389	0.0364034	0.0243324	0.0324885
cg00186701	0.79158	0.527985	0.336761	0.749334	0.602003	0.84171	0.656016	0.899136	0.672373	0.86042	0.726034	0.502449	0.831236	0.706382	0.816056	0.759925	0.534927	0.88525	0.401247	0.552932	0.189194	0.166365	0.826529	0.0879928	0.782165	0.745686	0.253799	0.509862	0.904431	0.864657	0.149773	0.67861	0.464204	0.574231	0.668019	0.517276	0.168836	0.611652	0.412897	0.769927	0.799699	0.471618	0.567759	0.769456	0.492446	0.622832	0.757806	0.742626	0.732035
cg00186954	0.805414	0.826951	0.910474	0.920665	0.718844	0.821593	0.907743	0.927704	0.900704	0.912155	0.904906	0.784086	0.934638	0.899338	0.811822	0.861516	0.800896	0.868345	0.794277	0.918144	0.899968	0.921611	0.933062	0.598339	0.928965	0.874964	0.893034	0.866139	0.897972	0.898392	0.862882	0.915202	0.691738	0.902385	0.875489	0.909108	0.841239	0.765175	0.918144	0.827897	0.945459	0.740486	0.689637	0.91205	0.830313	0.909003	0.911245	0.899548	0.854792
cg00187380	0.0618333	0.107111	0.0548611	0.0911503	0.0387325	0.0263841	0.0473848	0.0440247	0.0644374	0.0599852	0.0656134	0.149448	0.0558691	0.0269721	0.0301642	0.0288202	0.0373885	0.0393205	0.0373885	0.100979	0.0782979	0.0309202	0.0401606	0.0450327	0.0362124	0.0608253	0.052761	0.0626733	0.0302482	0.0303322	0.0295762	0.0660334	0.0919903	0.0500729	0.0956025	0.0579692	0.0309202	0.0404126	0.0874542	0.0456207	0.0442767	0.0978705	0.0453687	0.0370524	0.0383125	0.0733417	0.0337763	0.0428486	0.0511649
cg00187686	0.581476	0.410338	0.0979933	0.284383	0.236515	0.152193	0.736497	0.608815	0.6893	0.575528	0.333307	0.575912	0.106531	0.750407	0.289755	0.334267	0.359784	0.858423	0.269706	0.423097	0.278724	0.522096	0.510776	0.228745	0.536485	0.195361	0.171091	0.289372	0.123606	0.0702698	0.0282529	0.447271	0.591932	0.38367	0.208887	0.644309	0.589438	0.711364	0.347888	0.74609	0.553081	0.597784	0.37283	0.133103	0.308174	0.37072	0.154176	0.290331	0.390097
cg00191052	0.326186	0.259056	0.698872	0.738457	0.15785	0.766615	0.726724	0.571651	0.574201	0.842825	0.327206	0.141322	0.832929	0.4833	0.598687	0.0622553	0.546451	0.602767	0.251812	0.735804	0.484932	0.77243	0.838234	0.129386	0.737232	0.697954	0.749475	0.485646	-0.0535396	0.370362	0.813953	0.643984	0.651126	0.607665	0.789774	0.627457	0.507887	0.289968	0.802424	0.647351	0.866596	0.130712	0.729275	0.0694989	0.355568	0.684079	0.478335	0.668674	0.3925
cg00197381	0.0265457	0.0355641	0.033393	0.0363991	0.0223705	0.0193644	0.0268797	0.0282158	0.0351466	0.0318899	0.0331425	0.044499	0.0746439	0.0183623	0.0191139	0.032725	0.0301364	0.0236231	0.0485072	0.0233726	0.0389043	0.0208674	0.0253766	0.0279653	0.0250426	0.0402403	0.0309714	0.033059	0.0166087	0.0277147	0.0353136	0.0208674	0.0262117	0.0278818	0.0195314	0.0289673	0.022955	0.0316394	0.0403238	0.0395723	0.0242076	0.0406578	0.0245416	0.0272137	0.0193644	0.0247921	0.0384032	0.0199489	0.0387373
cg00197641	0.0598445	0.0623822	0.042899	0.0720419	0.0613998	0.0594351	0.0496936	0.0499391	0.0545234	0.0552602	0.0460098	0.0725331	0.0441269	0.0875138	0.0581253	0.0433083	0.042326	0.0641013	0.0573886	0.0422441	0.0633645	0.0490387	0.0384784	0.0576342	0.0517401	0.0491205	0.0487112	0.0656567	0.0415892	0.0447	0.0727787	0.045273	0.0466647	0.0465009	0.0539504	0.0508396	0.052968	0.047647	0.0579616	0.0618091	0.063692	0.0353677	0.0417529	0.0419985	0.051822	0.0557513	0.0625186	0.0410162	0.0578798
cg00199549	0.960449	0.947285	0.901886	0.78642	0.482414	0.96107	0.938786	0.863225	0.90966	0.937438	0.986879	0.875041	0.924793	0.969259	0.925104	0.949669	0.925829	0.950809	0.967704	0.9335	0.744234	0.938682	0.909971	0.958479	0.944279	0.962107	0.867267	0.518484	0.480652	0.575077	0.732833	0.971125	0.935158	0.926348	0.877943	0.946559	0.408926	0.44085	0.821557	0.917537	0.961589	0.688471	0.932878	0.829331	0.938267	0.916294	0.310493	0.920025	0.962107
cg00200063	0.0234797	0.0302593	0.0281732	0.0307808	0.019916	0.0249573	0.0216544	0.0275648	0.0274779	0.0268695	0.0180038	0.0272171	0.0233058	0.0297377	0.0226105	0.0230451	0.0355612	0.0226105	0.0285209	0.0218282	0.0306938	0.0255657	0.0221759	0.0212198	0.0269564	0.0275648	0.0283471	0.0386034	0.021046	0.025218	0.0221759	0.0202637	0.0181777	0.0240012	0.0287816	0.0226974	0.0228712	0.0306938	0.0268695	0.0221759	0.0280863	0.0215675	0.0215675	0.0219151	0.0215675	0.0242619	0.0296798	0.027304	0.0288686
cg00201234	0.60936	0.441714	0.41203	0.456357	0.492914	0.367005	0.376568	0.419301	0.449683	0.438427	0.448886	0.27865	0.518315	0.407746	0.477873	0.392307	0.553279	0.470502	0.44789	0.425677	0.250958	0.567424	0.463629	0.438028	0.46572	0.476777	0.435937	0.444105	0.487237	0.630976	0.385334	0.326663	0.300963	0.48883	0.451775	0.353259	0.547302	0.511641	0.481559	0.439124	0.623904	0.390514	0.511243	0.484746	0.375173	0.389019	0.41804	0.532062	0.434642
cg00202702	0.0279895	0.0449155	0.0376761	0.0545002	0.0283973	0.0546021	0.0353309	0.0333936	0.0443038	0.0443038	0.0323739	0.0486882	0.41005	0.0394095	0.0249305	0.0210559	0.0161616	0.0287032	0.0254404	0.0439979	0.037982	0.023503	0.336125	0.0269698	0.0589866	0.0246246	0.0347191	0.0454254	0.0370643	0.0219736	0.0182009	0.0261541	0.049402	0.0230952	0.0674496	0.0255423	0.0410409	0.0420605	0.329396	0.292179	0.186238	0.0928387	0.0358407	0.0313543	0.0299268	0.0565395	0.0344132	0.0222795	0.0388996
cg00202711	0.923838	0.615983	0.7132	0.644931	0.770701	0.79461	0.614896	0.80202	0.600768	0.89489	0.77732	0.472627	0.823953	0.548701	0.842132	0.31781	0.733158	0.886493	0.726439	0.615983	0.312574	0.890148	0.889358	0.754893	0.841243	0.699369	0.754597	0.75025	0.909315	0.803502	0.809134	0.7297	0.360194	0.720512	0.681881	0.588813	0.699072	0.595927	0.742445	0.618058	0.957825	0.547318	0.737208	0.189471	0.683956	0.683265	0.851683	0.675262	0.672594
cg00206052	0.0275211	0.0345282	0.0347785	0.0284387	0.0228497	0.0271874	0.0228497	0.0355293	0.0267704	0.0316086	0.0268538	0.035279	0.0303573	0.0291895	0.027104	0.0216818	0.026103	0.0237673	0.0259362	0.0283553	0.0296066	0.0274377	0.0366137	0.0337775	0.0274377	0.0288558	0.0245181	0.0293563	0.0246849	0.0229331	0.0267704	0.0284387	0.0240176	0.0321091	0.0336941	0.0286056	0.0301071	0.0242678	0.0285221	0.0345282	0.027104	0.0373645	0.0314418	0.0312749	0.0212648	0.0271874	0.0296344	0.0203472	0.027104
cg00207534	0.0303981	0.0164458	0.0192528	0.0183446	0.0154551	0.0180969	0.0190876	0.0263527	0.0245365	0.0194179	0.0172714	0.0168586	0.0223074	0.0290771	0.0186749	0.0180969	0.0165283	0.019583	0.019583	0.0176016	0.0205737	0.0192528	0.0161981	0.0222248	0.0180144	0.0222248	0.0169411	0.0172714	0.0165283	0.0161156	0.0168586	0.0266004	0.0185923	0.021069	0.0209865	0.0185923	0.0162807	0.0209865	0.0181795	0.0179318	0.0189225	0.0151249	0.0159504	0.0241237	0.0205737	0.0168586	0.0264078	0.0199132	0.0199958
cg00208830	0.241457	0.487409	0.253632	0.369097	0.193838	0.296342	0.353584	0.249606	0.329823	0.134927	0.264334	0.606114	0.271502	0.21534	0.143273	0.416913	0.240868	0.268654	0.291433	0.367231	0.418287	0.204147	0.141604	0.344944	0.2283	0.309303	0.247741	0.489667	0.237628	0.128054	0.182841	0.254221	0.600419	0.214849	0.334143	0.521675	0.238806	0.232915	0.359769	0.2932	0.221722	0.480536	0.180877	0.160259	0.329627	0.30675	0.176426	0.234682	0.336107
cg00208967	0.447365	0.335543	0.33203	0.375159	0.481615	0.70887	0.455171	0.512839	0.521523	0.820107	0.229672	0.269679	0.843623	0.502594	0.103799	0.140878	0.0799903	0.44073	0.0827224	0.570604	0.256116	0.311441	0.761171	0.568653	0.0806733	0.344422	0.371744	0.217866	0.0390082	0.447561	0.844794	0.100384	0.396918	0.224696	0.642128	0.228697	0.341983	0.246358	0.445316	0.428533	0.56553	0.391357	0.282071	0.782443	0.112971	0.61266	0.410319	0.587583	0.635883
cg00209066	0.943671	0.928685	0.903114	0.944889	0.899742	0.885879	0.936553	0.905736	0.911731	0.944327	0.940674	0.929434	0.867614	0.944046	0.935054	0.91604	0.908546	0.913885	0.908827	0.931214	0.862088	0.920255	0.92372	0.913698	0.913604	0.88616	0.897025	0.903676	0.94976	0.935148	0.921566	0.951727	0.869207	0.929621	0.923346	0.917351	0.931307	0.879791	0.939082	0.929996	0.926156	0.947137	0.924751	0.931495	0.920629	0.913417	0.935803	0.913698	0.922128
cg00209951	0.0451792	0.0467971	0.042375	0.0569354	0.0357959	0.449743	0.0407572	0.0448557	0.0526212	0.0526212	0.0519741	0.0543469	0.819793	0.0443164	0.0474442	0.0418357	0.0400022	0.0437771	0.0397865	0.0463656	0.0504641	0.0402179	0.0484149	0.0455028	0.0448557	0.0473363	0.0556412	0.0493856	0.040865	0.0393551	0.0453949	0.0409729	0.22918	0.047552	0.644097	0.0459342	0.0457185	0.0502484	0.0596318	0.0412965	0.0441007	0.0484149	0.0417279	0.0479835	0.0434536	0.258948	0.0471925	0.04313	0.0463656
cg00210842	0.030968	0.0287882	0.0230182	0.0312244	0.0400717	0.0273777	0.0195562	0.0346864	0.0331477	0.0289164	0.027506	0.0325066	0.0290446	0.0450724	0.0232746	0.0255826	0.0289164	0.0262238	0.0299422	0.0304551	0.0287882	0.026352	0.0213513	0.0343017	0.0257109	0.0276342	0.0235311	0.0372508	0.0187869	0.0189151	0.0209667	0.025198	0.015966	0.0223771	0.0295575	0.0254544	0.0255826	0.0328913	0.0272495	0.0243004	0.0325066	0.0289164	0.0273777	0.0244286	0.0153249	0.0234029	0.0307543	0.0212231	0.0493037
cg00211661	0.0318147	0.025859	0.0154846	0.0317187	0.0264354	0.0189427	0.0269157	0.0201915	0.0317187	0.484064	0.02413	0.0680292	0.262838	0.0201915	0.0230733	0.0172137	0.0153885	0.0292211	0.0231694	0.0319108	0.286853	0.0224969	0.259092	0.0256669	0.0319108	0.0155806	0.493189	0.0399798	0.0267236	0.0153885	0.0272999	0.0189427	0.0296054	0.0276842	0.157365	0.0250905	0.0440143	0.293962	0.0405562	0.0170215	0.0346005	0.0204797	0.0130831	0.658412	0.0236497	0.032295	0.0270758	0.0320068	0.0266275
cg00213331	0.932741	0.935773	0.949415	0.950647	0.946857	0.920709	0.94392	0.94771	0.933025	0.952352	0.935773	0.930183	0.94752	0.939941	0.95112	0.934162	0.948563	0.940794	0.921657	0.936625	0.945057	0.948847	0.945531	0.933404	0.954531	0.944583	0.94591	0.948657	0.95311	0.932173	0.935204	0.953299	0.942594	0.93511	0.949226	0.9551	0.922983	0.928667	0.953205	0.938141	0.959931	0.952447	0.935678	0.932552	0.949415	0.94951	0.926678	0.932552	0.946099
cg00214855	0.0812812	0.0545866	0.0867238	0.0849096	0.0478482	0.0908705	0.0478482	0.079467	0.114973	0.100719	0.0605475	0.0898338	0.0750611	0.0877604	0.0372222	0.0538091	0.0558825	0.0701369	0.0838729	0.0789486	0.0996823	0.0755794	0.0841321	0.119379	0.082577	0.100201	0.0786895	0.0771345	0.0351489	0.0540683	0.033853	0.05977	0.044479	0.0745427	0.0921663	0.0654718	0.0618434	0.0763569	0.101756	0.0564008	0.0836137	0.0659901	0.0748019	0.0654718	0.0501807	0.0618434	0.0848232	0.0548458	0.0748019
cg00215066	0.928285	0.944948	0.934117	0.960029	0.928285	0.93845	0.955363	0.899458	0.925119	0.950281	0.926786	0.9382	0.946615	0.976442	0.960695	0.945698	0.925952	0.938033	0.950364	0.940033	0.909372	0.943365	0.943699	0.942366	0.968777	0.93945	0.946781	0.95203	0.941949	0.95403	0.928535	0.953113	0.956113	0.942699	0.949531	0.944199	0.935284	0.943282	0.956196	0.949531	0.93795	0.913871	0.948614	0.927785	0.940533	0.942366	0.940616	0.934201	0.941366
cg00216361	0.116167	0.104415	0.0311198	0.0539022	0.100086	0.203379	0.0490571	0.0659635	0.0408101	0.548414	0.0413255	0.0927663	0.0727673	0.0239037	0.0441089	0.0263778	0.0277179	0.0296766	0.0600875	0.065345	0.0634894	0.0349341	0.0995701	0.0863748	0.0400885	0.106168	0.0484386	0.071324	0.0268932	0.0453459	0.25781	0.0244191	0.0702932	0.041841	0.0417379	0.209255	0.034831	0.057201	0.0645203	0.329249	0.045449	0.255542	0.0177184	0.0576134	0.0182339	0.221214	0.0286801	0.0342125	0.310797
cg00216758	0.0660542	0.0572098	0.0500828	0.0541186	0.0508556	0.0533458	0.051886	0.0534316	0.0457035	0.0788486	0.0439862	0.0628771	0.0548055	0.0782475	0.0501687	0.0500828	0.0548055	0.0648521	0.0521436	0.0553207	0.0624478	0.0530882	0.0506839	0.0512849	0.0633065	0.0523154	0.0540327	0.0686303	0.0542045	0.040208	0.0493959	0.0489665	0.0451025	0.0468198	0.0826267	0.0461329	0.0547197	0.0451883	0.0641651	0.0485372	0.053174	0.0524012	0.0446731	0.048623	0.0591848	0.0432134	0.0833137	0.0617608	0.0553207
cg00217795	0.405883	0.569673	0.599836	0.517347	0.550213	0.553132	0.696813	0.662433	0.78579	0.899308	0.598431	0.630973	0.808169	0.903956	0.323069	0.826116	0.638865	0.854765	0.472264	0.73768	0.54178	0.262093	0.77087	0.338745	0.214308	0.323717	0.470318	0.280905	0.884604	0.188901	0.404261	0.691948	0.597458	0.310311	0.781357	0.585674	0.538969	0.387287	0.664704	0.46675	0.883307	0.595944	0.706219	0.391179	0.420478	0.754978	0.562393	0.568376	0.373341
cg00221494	0.0488228	0.238857	0.367764	0.115667	0.0896781	0.365997	0.262975	0.0792823	0.0879108	0.0867673	0.0680549	0.148414	0.491786	0.067847	0.075124	0.0945641	0.0421695	0.0769953	0.0698222	0.145191	0.132924	0.0601541	0.498751	0.0762676	0.166191	0.637326	0.349156	0.211828	0.021482	0.12336	0.510602	0.077515	0.212868	0.0537088	0.210269	0.184071	0.0959155	0.109326	0.233555	0.0899899	0.119306	0.150077	0.0492386	0.14831	0.0929007	0.172012	0.057278	0.0267838	0.0941482
cg00223186	0.0236986	0.0299443	0.0289406	0.0276022	0.0216911	0.0245909	0.0226949	0.0364131	0.0337364	0.0410974	0.0243678	0.0383091	0.0252601	0.0341825	0.0199066	0.0238102	0.0341825	0.0291636	0.0265984	0.0258177	0.0307251	0.0262638	0.0213565	0.0287175	0.0262638	0.0282714	0.0309481	0.0332903	0.0193489	0.0234756	0.0165607	0.0177875	0.0187913	0.0365246	0.0224718	0.0226949	0.0261523	0.0265984	0.0369708	0.0297213	0.0247024	0.0226949	0.0307251	0.0311712	0.0234756	0.0222487	0.0268587	0.0193489	0.0259292
cg00223950	0.0455006	0.0447533	0.0360356	0.0512294	0.0418474	0.0486556	0.0380282	0.0390245	0.0681667	0.0585357	0.0420965	0.0462478	0.0299747	0.0569582	0.0544674	0.037281	0.0338769	0.0445043	0.0389415	0.034126	0.0524748	0.031137	0.0454175	0.0552977	0.040436	0.0535541	0.0328806	0.0541353	0.0332127	0.0429268	0.0507312	0.037364	0.034209	0.0370319	0.0931577	0.0507312	0.0411832	0.0508143	0.0422625	0.0474932	0.0554637	0.0385264	0.034209	0.0317182	0.059532	0.0413493	0.0400762	0.0296426	0.0546335
cg00224508	0.0293275	0.0375851	0.0185675	0.0299114	0.0445916	0.02841	0.0421727	0.0423395	0.0358335	0.0495128	0.0321634	0.0437575	0.0297445	0.038586	0.034916	0.0307455	0.0355833	0.0267418	0.034916	0.0324971	0.025157	0.0306621	0.0301616	0.0408381	0.0311625	0.0271588	0.0382524	0.0308289	0.0279929	0.0196519	0.030245	0.0314127	0.0294109	0.0321634	0.0313293	0.0218206	0.0275759	0.0462598	0.0273256	0.0312459	0.0419225	0.0324137	0.0425897	0.0390865	0.0285768	0.0391699	0.0276871	0.025574	0.0273256
cg00226923	0.811917	0.806577	0.771513	0.613019	0.775745	0.626218	0.841641	0.876302	0.751361	0.876907	0.842246	0.636697	0.762042	0.888897	0.871768	0.811716	0.77373	0.897361	0.730202	0.781186	0.665917	0.823908	0.789851	0.798617	0.854438	0.785115	0.80698	0.81756	0.907235	0.87066	0.730202	0.851516	0.754082	0.768692	0.840734	0.796602	0.780682	0.793478	0.795494	0.898671	0.833177	0.649292	0.847183	0.886378	0.854035	0.749245	0.849097	0.82693	0.805166
cg00228799	0.0422132	0.0285897	0.0362791	0.0448878	0.0321836	0.0314314	0.0224884	0.0321001	0.0318493	0.0309299	0.0270017	0.0320165	0.0290912	0.0323508	0.025748	0.0371984	0.0336045	0.0224884	0.0454729	0.0334373	0.0292583	0.0336045	0.0343567	0.0303449	0.0281718	0.0295927	0.0327687	0.0373656	0.0279211	0.0272524	0.0311807	0.0295927	0.0310971	0.0516578	0.0501533	0.0290912	0.0300941	0.0298434	0.0467266	0.0242435	0.0453057	0.0316822	0.0250793	0.032518	0.0318493	0.0249958	0.0305399	0.0359447	0.0336881
cg00229387	0.260792	0.277695	0.16521	0.241676	0.175875	0.175372	0.25717	0.164405	0.164707	0.203745	0.17507	0.291579	0.0795893	0.216724	0.124764	0.150823	0.166317	0.131002	0.0979007	0.223968	0.206663	0.221553	0.132109	0.166317	0.163701	0.162796	0.16843	0.170342	0.108867	0.120639	0.106352	0.175976	0.255862	0.148509	0.188351	0.299025	0.146496	0.144082	0.215718	0.141566	0.0796899	0.190967	0.0859279	0.198915	0.162695	0.158771	0.088745	0.144585	0.15042
cg00230271	0.0551771	0.0303719	0.0315583	0.0451472	0.0314504	0.0286464	0.0316661	0.0231461	0.033176	0.0332838	0.0379213	0.0493532	0.021097	0.0567948	0.0247638	0.0435294	0.0309112	0.0227147	0.0250874	0.0311269	0.031774	0.0371664	0.0305876	0.0328525	0.0375978	0.0382449	0.0329603	0.0455786	0.0413725	0.0305876	0.0269208	0.033176	0.0315583	0.0384606	0.0391077	0.0319897	0.0389998	0.05453	0.0464413	0.0235775	0.0300484	0.0359801	0.0311269	0.0351173	0.0302641	0.0350094	0.0422712	0.031019	0.0400783
cg00230368	0.172882	0.034547	0.0383965	0.0506001	0.0402802	0.0342194	0.0331546	0.0304518	0.0442935	0.0373317	0.0337279	0.0326632	0.0257833	0.0435564	0.0375774	0.0306975	0.0354479	0.02693	0.0434745	0.0297147	0.0437202	0.0506001	0.0322537	0.0327451	0.0422459	0.0410174	0.0343832	0.0416726	0.0330727	0.0308613	0.0392155	0.027749	0.034547	0.0446211	0.0374955	0.0324175	0.0373317	0.0465049	0.0493715	0.0329089	0.0372498	0.0347108	0.027749	0.038806	0.0288137	0.0267661	0.0416999	0.0254557	0.0443754
cg00230502	0.147519	0.127274	0.0525654	0.1155	0.0583253	0.0983903	0.0834824	0.0616287	0.21003	0.0885646	0.294819	0.170897	0.617541	0.0346082	0.0301189	0.0368105	0.0359634	0.40739	0.127359	0.17852	0.0953409	0.0929692	0.0461279	0.0487537	0.061544	0.412896	0.215197	0.0784001	0.0475679	0.0174133	0.0228343	0.147349	0.249587	0.0474832	0.0684051	0.189701	0.0436715	0.0275777	0.125919	0.195885	0.025206	0.169372	0.0459585	0.0318976	0.0477373	0.353349	0.0358787	0.0311353	0.05697
cg00230685	0.0415005	0.0520831	0.54364	0.406184	0.0273507	0.593699	0.425091	0.251131	0.495245	0.0403114	0.0562448	0.0520831	0.276696	0.0432841	0.397148	0.0416194	0.229134	0.0381711	0.0406681	0.0298477	0.0714647	0.0263995	0.0325826	0.0381711	0.524852	0.414865	0.0393602	0.0459	0.0342472	0.225923	0.5132	0.556244	0.400001	0.335198	0.509751	0.549347	0.315459	0.0350796	0.467421	0.270275	0.0279452	0.250299	0.445542	0.0325826	0.302023	0.444948	0.41974	0.546731	0.291678
cg00231140	0.0219755	0.0535771	0.0487471	0.055647	0.0182495	0.0422612	0.0461252	0.716521	0.0755188	0.0444692	0.0230794	0.0664109	0.0281854	0.0426752	0.0755188	0.0226655	0.0244594	0.055923	0.0484711	0.0629609	0.277134	0.0399152	0.0450212	0.0740008	0.0207335	0.576314	0.0208715	0.0469531	0.0451592	0.0219755	0.0945625	0.0403292	0.0439172	0.0367413	0.117884	0.0441932	0.0439172	0.0642029	0.056613	0.0203195	0.0494371	0.055371	0.0182495	0.0255634	0.0468151	0.0317733	0.060155	0.0240454	0.0648929
cg00231644	0.26602	0.0917196	0.671319	0.199171	0.0596279	0.151187	0.40505	0.553615	0.101973	0.246642	0.237927	0.0942829	0.0834148	0.190661	0.289499	0.326307	0.148008	0.194967	0.0809541	0.112738	0.261509	0.461031	0.185432	0.158364	0.351324	0.175384	0.235979	0.271864	0.0676252	0.0437358	0.584271	0.146983	0.105459	0.435193	0.382596	0.24131	0.0583976	0.0718289	0.398796	0.262739	0.143292	0.103408	0.0925399	0.230852	0.124529	0.320771	0.112875	0.441653	0.10915
cg00231920	0.0807114	0.0593254	0.0493168	0.0699329	0.0354587	0.0470071	0.0511988	0.0375973	0.0475204	0.0560748	0.0519687	0.0619773	0.0865284	0.0502578	0.0689919	0.0368274	0.0302406	0.0341756	0.0543639	0.053594	0.0423022	0.0595821	0.046665	0.0552193	0.061464	0.0577857	0.0411046	0.0474349	0.0501723	0.05847	0.0490602	0.0600953	0.0604375	0.0547916	0.0463228	0.044783	0.0535085	0.0737823	0.0715582	0.0488036	0.076092	0.0573579	0.0516265	0.0565025	0.0454674	0.0478626	0.0591544	0.0617207	0.0397359
cg00233307	0.655758	0.406255	0.223909	0.457775	0.377908	0.567116	0.551705	0.614586	0.459238	0.480723	0.540793	0.226271	0.57049	0.568691	0.335949	0.31795	0.306364	0.550017	0.389269	0.375095	0.23797	0.698504	0.659695	0.432803	0.533706	0.474986	0.464187	0.438652	0.305801	0.525382	0.633935	0.4679	0.260243	0.531119	0.462613	0.386119	0.224246	0.315363	0.476336	0.545293	0.793671	0.361484	0.4589	0.577465	0.534494	0.443489	0.551855	0.601425	0.441014
cg00234616	0.0505001	0.16749	0.111568	0.289178	0.0786851	0.669452	0.284257	0.0866261	0.16078	0.406728	0.1317	0.257302	0.814068	0.127673	0.210551	0.343982	0.0603425	0.0734284	0.117831	0.200708	0.183149	0.101949	0.396326	0.12689	0.145792	0.276987	0.149148	0.226545	0.0898696	0.0560924	0.710947	0.121746	0.382681	0.138299	0.62505	0.238624	0.0790206	0.0915473	0.406951	0.0827115	0.379997	0.221288	0.106311	0.130022	0.0874091	0.522152	0.141617	0.0604543	0.20988
cg00236832	0.0263288	0.100416	0.0317953	0.0821562	0.0327257	0.0490087	0.0238864	0.03133	0.0370291	0.0409835	0.0606394	0.200092	0.0978577	0.0257473	0.0413325	0.439102	0.0292365	0.0381922	0.0433097	0.10251	0.119026	0.033191	0.160547	0.0550567	0.0251658	0.0770387	0.0424955	0.301744	0.0748289	0.0297017	0.0317953	0.0290039	0.186018	0.04645	0.305698	0.0590111	0.024119	0.0359823	0.0715723	0.04645	0.034354	0.0585459	0.0442401	0.0454032	0.0352845	0.0431934	0.0465663	0.0497066	0.327448
cg00237010	0.869894	0.722298	0.83011	0.646357	0.837913	0.871982	0.843628	0.841649	0.597232	0.814834	0.700208	0.560636	0.899567	0.746806	0.728233	0.861871	0.629213	0.863849	0.64361	0.836374	0.60009	0.672843	0.642181	0.766038	0.845716	0.733948	0.739113	0.693614	0.834946	0.832967	0.800986	0.820768	0.777248	0.838133	0.81857	0.827692	0.252257	0.733838	0.80846	0.80769	0.849782	0.815273	0.319186	0.781204	0.788018	0.784721	0.389558	0.735047	0.857475
cg00239071	0.914149	0.938461	0.890769	0.940976	0.932313	0.906418	0.93725	0.92039	0.850808	0.939951	0.9352	0.92719	0.916571	0.894122	0.939299	0.901667	0.940883	0.958953	0.886763	0.917875	0.853323	0.93902	0.908187	0.876796	0.934548	0.884434	0.90707	0.930636	0.943118	0.920949	0.906045	0.933151	0.930543	0.90707	0.921601	0.92514	0.926538	0.891514	0.934083	0.918993	0.943118	0.909398	0.924209	0.906883	0.929984	0.916198	0.929705	0.923557	0.899059
cg00239685	0.0282974	0.0760978	0.0254088	0.0628665	0.0259679	0.0364039	0.0329563	0.0332358	0.036963	0.0438581	0.0551327	0.0543873	0.0363107	0.0428332	0.0336085	0.0353789	0.0308132	0.0407833	0.0286701	0.04274	0.0610961	0.0414355	0.0390129	0.045349	0.0414355	0.0522442	0.031745	0.048983	0.0499147	0.0367766	0.0419014	0.0364971	0.0462808	0.0398515	0.0621211	0.0377084	0.034913	0.044324	0.0542009	0.0351926	0.029695	0.059978	0.031745	0.0413423	0.0288564	0.064171	0.034882	0.0285769	0.0516851
cg00240432	0.72667	0.404349	0.670017	0.686743	0.599057	0.705885	0.47154	0.735371	0.423298	0.782453	0.642175	0.182476	0.819383	0.741268	0.738755	0.624966	0.0587291	0.816	0.545498	0.497739	0.085412	0.778876	0.711975	0.437413	0.827504	0.665087	0.664507	0.271708	0.594029	0.3156	0.734984	0.642465	0.22279	0.625836	0.60128	0.28969	0.47299	0.587262	0.611335	0.625836	0.872846	0.37641	0.578464	0.562513	0.0496415	0.514368	0.603278	0.521715	0.647685
cg00241355	0.0351232	0.0448283	0.0990624	0.0448283	0.0366728	0.0423001	0.0348786	0.0364281	0.059182	0.0336552	0.0299853	0.065951	0.0403428	0.0523313	0.0253366	0.057714	0.0456438	0.0308824	0.0520867	0.0440127	0.0469487	0.0529022	0.0414845	0.0864214	0.0290882	0.043605	0.0438496	0.0339815	0.0378146	0.0195462	0.0411583	0.0248473	0.0789183	0.0326766	0.0418107	0.0389563	0.0792445	0.0926195	0.0572247	0.0328397	0.0458069	0.0379777	0.025092	0.0449914	0.0345523	0.0361019	0.0573606	0.0433603	0.0610577
cg00243313	0.109015	0.443589	0.634172	0.639174	0.479979	0.661244	0.44202	0.60249	0.445845	0.728728	0.555997	0.248789	0.786599	0.167475	0.703813	0.443982	0.630346	0.786108	0.464285	0.445551	0.16718	0.476546	0.603961	0.512642	0.0792947	0.633681	0.60759	0.0919479	0.410142	0.584834	0.473113	0.510386	0.226523	0.673112	0.59327	0.427699	0.124317	0.565609	0.402589	0.566884	0.893906	0.412398	0.619459	0.108525	0.540401	0.511269	0.643654	0.628385	0.427797
cg00247489	0.0222305	0.0292783	0.0206526	0.0286471	0.0238083	0.410176	0.0225461	0.0224409	0.0277004	0.304038	0.0237032	0.0411649	0.776136	0.0321184	0.0263329	0.0207578	0.02749	0.364417	0.0237032	0.0244395	0.0301198	0.0296991	0.603307	0.0257018	0.0308562	0.0886061	0.0336963	0.0222305	0.0205474	0.0183384	0.7592	0.0170761	0.203685	0.0306458	0.0286471	0.0218097	0.0260174	0.0286471	0.030225	0.0242291	0.0335911	0.0330652	0.0166553	0.0248603	0.0178124	0.453199	0.0339067	0.0263329	0.0291731
cg00250430	0.487059	0.419718	0.511462	0.786275	0.432181	0.725112	0.647193	0.660493	0.433961	0.606138	0.0197517	0.459201	0.844191	0.700605	0.78795	0.511881	0.0512756	0.864404	0.109925	0.542881	0.592942	0.67945	0.595141	0.0272923	0.69872	0.558486	0.717153	0.641328	0.86011	0.492191	0.866917	0.46161	0.39542	0.311322	0.762291	0.600483	0.462238	0.018076	0.0400695	0.497533	0.757264	0.537121	0.223138	0.85613	0.0577689	0.633892	0.472327	0.0512756	0.602473
cg00253200	0.0324348	0.0321742	0.0346932	0.0378202	0.0241828	0.029742	0.0327822	0.0345195	0.0281785	0.0315661	0.0326953	0.0346063	0.0237485	0.0304369	0.0233142	0.0289602	0.0203608	0.0225324	0.0194922	0.042424	0.0414685	0.0308712	0.0359093	0.0338246	0.0243565	0.0276573	0.0181893	0.03921	0.0248777	0.0216638	0.0313924	0.0225324	0.0372122	0.024704	0.0258332	0.0201002	0.0300895	0.0305238	0.0339983	0.0246171	0.0412079	0.032261	0.0168863	0.0309581	0.0223587	0.0345195	0.0367779	0.022793	0.0301763
cg00256074	0.818177	0.93498	0.933332	0.952816	0.952331	0.943898	0.954851	0.6595	0.940214	0.952816	0.935174	0.824865	0.93624	0.9533	0.955723	0.957565	0.91443	0.947969	0.945739	0.935174	0.916854	0.832329	0.852685	0.925868	0.955917	0.930618	0.907936	0.945255	0.684799	0.956014	0.939342	0.946612	0.902896	0.902702	0.951362	0.934398	0.926353	0.911426	0.951943	0.929455	0.948841	0.820988	0.943607	0.737918	0.840375	0.947775	0.874204	0.891167	0.915981
cg00256166	0.0240864	0.0516154	0.0373733	0.0216548	0.0350286	0.0336391	0.0389365	0.0352891	0.0456233	0.0404996	0.0358101	0.0448417	0.0422365	0.026518	0.0282549	0.030947	0.0418891	0.0306864	0.0306864	0.0362444	0.042497	0.0479681	0.035897	0.0434523	0.0219154	0.0376338	0.0332917	0.0334654	0.0392838	0.0255627	0.0291233	0.0185285	0.0307733	0.0252154	0.0587365	0.0361575	0.0315549	0.037547	0.0305128	0.0340733	0.0324233	0.029818	0.0338996	0.0304259	0.0356365	0.0308601	0.0270391	0.0275601	0.0278206
cg00256281	0.0516221	0.0334828	0.0333968	0.0509344	0.0306459	0.0346004	0.0269492	0.0429393	0.0396725	0.0391567	0.0387269	0.0462921	0.0285826	0.030302	0.0315915	0.0403603	0.0424235	0.0348583	0.0468079	0.0375233	0.0507624	0.0335688	0.0430253	0.0259176	0.0471518	0.0358899	0.0279808	0.0453464	0.0296142	0.0429393	0.466333	0.0352881	0.0382111	0.0408761	0.035718	0.0287546	0.0351162	0.0448306	0.0585856	0.0390707	0.0389848	0.033053	0.0314196	0.0512782	0.0297862	0.0380391	0.0257457	0.0233386	0.0479255
cg00259755	0.0136151	0.0380088	0.0607346	0.0226846	0.0319625	0.0190359	0.0492674	0.236286	0.0523948	0.0149703	0.0436381	0.0274799	0.396096	0.0167425	0.00965375	0.0370706	0.0141363	0.0507269	0.0158043	0.0349857	0.201572	0.0175765	0.181869	0.0519778	0.0298776	0.108688	0.0414489	0.150282	0.0147618	0.0220591	0.11463	0.0179935	0.0590666	0.0456188	0.193753	0.0701168	0.0183062	0.0715762	0.0606303	0.024561	0.451242	0.166858	0.0193487	0.0362366	0.0147618	0.039781	0.0205301	0.0204954	0.0483292
cg00261552	0.0271026	0.031954	0.0361245	0.0364649	0.030422	0.029656	0.0305071	0.0303369	0.0345925	0.0344222	0.0305071	0.0421674	0.0302517	0.0396141	0.023613	0.0269324	0.0262515	0.0258259	0.0299113	0.0313582	0.0337413	0.0271026	0.0273579	0.0562109	0.0339116	0.0430185	0.0291453	0.0320391	0.025145	0.0276133	0.0291453	0.0303369	0.0290602	0.034252	0.0240386	0.0253153	0.0307624	0.0405503	0.0322093	0.0348478	0.0328902	0.0346776	0.0294857	0.0289751	0.0397843	0.0267622	0.0330037	0.0268473	0.0392736
cg00261781	0.0166179	0.0190035	0.018878	0.0298015	0.0148601	0.0172457	0.0124745	0.0152368	0.020008	0.0143579	0.013479	0.0143579	0.0100889	0.0167435	0.0142323	0.0131023	0.0126	0.0124745	0.0147345	0.0119723	0.0252814	0.0123489	0.0132278	0.0172457	0.0115956	0.0213891	0.0141067	0.0159901	0.00870774	0.0169946	0.00908442	0.0164923	0.0163668	0.0213891	0.014609	0.0161157	0.0161157	0.0164923	0.0154879	0.0230214	0.0169946	0.0281693	0.0163668	0.0230214	0.0126	0.0388417	0.0190454	0.01147	0.0161157
cg00262415	0.0298302	0.0289743	0.0285464	0.0292311	0.0245239	0.0207582	0.0259789	0.0289743	0.0356499	0.0346229	0.0246095	0.0256365	0.0239248	0.0258933	0.0228122	0.0268347	0.0315419	0.0349653	0.0221275	0.0293167	0.0264924	0.0248662	0.0270915	0.0380463	0.0254653	0.0288032	0.0257221	0.0252942	0.0300013	0.0196456	0.0210149	0.04224	0.025123	0.025123	0.0288887	0.0291455	0.0247807	0.0300869	0.0328256	0.0265779	0.0267491	0.0291455	0.0282896	0.0302581	0.0217852	0.0223843	0.0388736	0.0289743	0.0295734
cg00263760	0.0439775	0.576907	0.703775	0.734693	0.576907	0.574639	0.5666	0.178266	0.391397	0.825284	0.165177	0.411184	0.79148	0.0495428	0.835281	0.394591	0.0460388	0.0759265	0.205165	0.160334	0.136939	0.727479	0.800961	0.127251	0.0699489	0.690274	0.730261	0.147451	0.07335	0.102104	0.82044	0.429529	0.368929	0.504867	0.747885	0.131683	0.0644867	0.107463	0.644308	0.15415	0.771795	0.571238	0.107875	0.0845836	0.0776785	0.595251	0.833872	0.0808734	0.130343
cg00265415	0.0303663	0.0281334	0.0193675	0.0412823	0.0269757	0.0263968	0.0194502	0.0302009	0.0349973	0.0282161	0.0286296	0.0398765	0.0192848	0.0231716	0.0251563	0.0286296	0.0239159	0.0371475	0.0259833	0.0287123	0.0397938	0.0206907	0.0227581	0.0257352	0.0276372	0.0322683	0.0205253	0.0311932	0.0194502	0.0192021	0.0245774	0.0246601	0.0231716	0.0281334	0.0287123	0.0259833	0.0334261	0.0355762	0.0299528	0.037809	0.0255698	0.0235851	0.0230889	0.0321856	0.0192848	0.0337569	0.0281886	0.0215176	0.0205253
cg00265490	0.0393356	0.0373355	0.0362688	0.0401356	0.0405356	0.0250686	0.0480024	0.0441357	0.0545359	0.0406689	0.0441357	0.0537359	0.0812032	0.0406689	0.042269	0.0437357	0.0545359	0.0386689	0.0310687	0.042269	0.0512025	0.0289353	0.0416023	0.056936	0.027602	0.0480024	0.0410689	0.0440023	0.0412023	0.0397356	0.0326688	0.029602	0.030802	0.0353355	0.0294687	0.0372022	0.0376022	0.0588027	0.0374689	0.0389356	0.029202	0.042669	0.0309354	0.0460024	0.0366688	0.043069	0.0409356	0.0212018	0.0481358
cg00268009	0.037009	0.029045	0.0166927	0.0227063	0.0157175	0.0228688	0.0222187	0.0172616	0.0219749	0.0214873	0.0183993	0.0253881	0.0169365	0.0344085	0.0175054	0.0237628	0.0257131	0.0152299	0.0208372	0.0211623	0.0209997	0.0192119	0.0181555	0.0201058	0.0194557	0.0247379	0.0166114	0.0188056	0.0141735	0.0136859	0.0179117	0.0206747	0.0151487	0.0225438	0.0213248	0.0179929	0.0247379	0.0229501	0.0249817	0.0204309	0.0231126	0.0287199	0.0164489	0.0206747	0.0213248	0.0162864	0.0216499	0.0182367	0.0200246
cg00268338	0.0355231	0.0356364	0.0229408	0.0415308	0.0257746	0.197732	0.0244144	0.0263414	0.0333693	0.0358631	0.0197669	0.0321225	0.0265681	0.0346162	0.0391504	0.106369	0.0159129	0.0226007	0.0213538	0.0328026	0.0358631	0.0341628	0.0298554	0.027815	0.0407373	0.0307622	0.268125	0.0342762	0.0182933	0.0142126	0.0435712	0.0226007	0.0144393	0.0456115	0.691161	0.0282684	0.0352964	0.0267948	0.101382	0.025888	0.03711	0.0428911	0.0263414	0.0267948	0.031669	0.0365432	0.0355608	0.0402839	0.033256
cg00269115	0.0305414	0.027235	0.020021	0.0268342	0.0177165	0.0247301	0.0150112	0.0222252	0.0355511	0.0237282	0.015913	0.0294393	0.0203216	0.0210229	0.0197204	0.0198206	0.0205219	0.0177165	0.0201212	0.0218245	0.0224256	0.0235278	0.0198206	0.0181173	0.0167146	0.0248303	0.0198206	0.0208225	0.0137087	0.0168147	0.0172155	0.0239286	0.0157126	0.0212233	0.0396591	0.0173157	0.0233274	0.0245297	0.0323449	0.0181173	0.0223254	0.0220249	0.0191192	0.0225258	0.0148109	0.0177165	0.0234276	0.0238284	0.0199208
cg00273068	0.909295	0.453964	0.291345	0.421198	0.363284	0.422286	0.647534	0.613559	0.441631	0.700974	0.460372	0.46944	0.629398	0.512603	0.530618	0.455414	0.249874	0.658536	0.467868	0.326166	0.223033	0.314317	0.366307	0.254227	0.405843	0.341279	0.350468	0.394236	0.819462	0.419264	0.384201	0.526265	0.334146	0.416845	0.596633	0.430871	0.0520724	0.380574	0.497248	0.517197	0.614527	0.361954	0.277441	0.380574	0.382871	0.420231	0.449974	0.519857	0.305975
cg00273124	0.356001	0.576604	0.365398	0.418893	0.360379	0.584933	0.424446	0.423164	0.327919	0.338703	0.336995	0.690429	0.366252	0.323007	0.328239	0.307311	0.345217	0.302933	0.293536	0.550657	0.525671	0.264066	0.333258	0.347886	0.26492	0.383123	0.396577	0.552045	0.3418	0.216656	0.54425	0.471321	0.681887	0.26492	0.538057	0.533359	0.287236	0.294818	0.441103	0.334432	0.226053	0.53731	0.259261	0.240895	0.369669	0.388035	0.235164	0.283606	0.33518
cg00274399	0.0400658	0.0495273	0.0456726	0.0502281	0.0362111	0.0482132	0.0303414	0.0327068	0.0551341	0.0551341	0.0405038	0.0412046	0.0654717	0.0748456	0.0310423	0.0434824	0.0341085	0.0465486	0.0526811	0.0436576	0.0459354	0.0337581	0.0424311	0.0424311	0.0365615	0.0384012	0.0294654	0.0414675	0.0441833	0.0329696	0.0448841	0.0439204	0.0309547	0.0563606	0.0403286	0.048476	0.0374376	0.0362987	0.0662601	0.0320936	0.0429568	0.0384012	0.0247346	0.0495273	0.0474247	0.043132	0.0303998	0.0288521	0.0457602
cg00275232	0.068117	0.0240747	0.0189963	0.0272269	0.0236369	0.0182958	0.0194341	0.057785	0.0210102	0.0248628	0.0182083	0.0199594	0.112685	0.0505176	0.014093	0.0168073	0.017858	0.0238121	0.0158442	0.017858	0.0203097	0.0196092	0.0161944	0.0203972	0.0160193	0.0194341	0.01707	0.0260886	0.0120791	0.0210102	0.0147059	0.0224111	0.0147935	0.0177705	0.0233743	0.0180331	0.0175953	0.0190839	0.022236	0.0190839	0.0210977	0.0142681	0.0182958	0.0177705	0.0185585	0.0158442	0.0279273	0.0217106	0.0215355
cg00276797	0.0339545	0.0318048	0.0243703	0.0276845	0.0206082	0.0282219	0.0207874	0.0282219	0.0375374	0.0258034	0.0370896	0.0356564	0.0181898	0.0292968	0.0180106	0.0301925	0.022131	0.038254	0.0347607	0.028401	0.0342233	0.0258034	0.0245494	0.0354773	0.0223101	0.0312674	0.0320735	0.0305508	0.022131	0.0266992	0.023385	0.0316257	0.0352085	0.0425535	0.0204291	0.0278636	0.0325214	0.027147	0.0313569	0.0268783	0.0239224	0.0301029	0.0232058	0.0393289	0.0330588	0.0239224	0.0374479	0.0249077	0.0400455
cg00278366	0.444956	0.4997	0.342033	0.559229	0.389989	0.69264	0.692083	0.380532	0.57603	0.478337	0.31989	0.357722	0.73826	0.442397	0.316663	0.659704	0.258581	0.520952	0.202279	0.397778	0.560675	0.351379	0.634446	0.464206	0.518282	0.564904	0.417918	0.376303	0.441173	0.29619	0.799569	0.325787	0.395887	0.488685	0.424928	0.491911	0.188148	0.344147	0.537865	0.53386	0.582373	0.368403	0.330572	0.625879	0.545098	0.589049	0.358686	0.639565	0.326344
cg00279797	0.0220678	0.0473205	0.240745	0.236089	0.0342464	0.181554	0.272624	0.182897	0.287489	0.0355001	0.0304854	0.0452609	0.183434	0.0606632	0.413842	0.0400671	0.0800057	0.0341569	0.0223365	0.0466937	0.0364851	0.0162472	0.0217096	0.0375597	0.233044	0.255789	0.0330823	0.0348733	0.0141876	0.0621855	0.334234	0.238417	0.229193	0.152271	0.387873	0.249879	0.217462	0.0377388	0.203224	0.158181	0.0331718	0.0492906	0.152361	0.0507233	0.19606	0.35868	0.300653	0.174837	0.092632
cg00282347	0.0831619	0.0449556	0.0515111	0.089615	0.0445458	0.330428	0.144517	0.154658	0.283412	0.458875	0.0290789	0.139703	0.86378	0.0453653	0.0543791	0.0408584	0.0590909	0.0385025	0.0332785	0.0861324	0.0996531	0.0432142	0.590292	0.0696412	0.0485406	0.482843	0.445969	0.0828546	0.0401413	0.0255963	0.315063	0.0644172	0.236704	0.0485406	0.765345	0.152814	0.035532	0.0477212	0.0754797	0.467991	0.74322	0.0885907	0.0365563	0.109999	0.0384	0.600945	0.0320494	0.0503843	0.0502819
cg00282683	0.0332063	0.0330435	0.0256329	0.0376852	0.0287274	0.0306004	0.0278316	0.0272616	0.0373595	0.0357308	0.0245743	0.030519	0.0306819	0.0182224	0.0191996	0.0291346	0.0236785	0.0219684	0.0327991	0.0370337	0.0323105	0.0335321	0.0388253	0.0337764	0.0352422	0.0235971	0.0240042	0.0418384	0.032962	0.0274245	0.0213169	0.0302747	0.0244928	0.031089	0.0277502	0.0244114	0.0297046	0.0398025	0.0469687	0.0241671	0.0240857	0.029216	0.0298675	0.0270987	0.0301118	0.0242485	0.0381467	0.0283203	0.0296232
cg00283535	0.125871	0.545271	0.153409	0.416426	0.233046	0.247041	0.335074	0.313766	0.285324	0.123162	0.393673	0.730999	0.146006	0.106458	0.164515	0.262029	0.1721	0.123252	0.252278	0.459585	0.445771	0.0970681	0.192776	0.327761	0.171558	0.255799	0.289207	0.426448	0.119821	0.131017	0.071245	0.417871	0.487033	0.158737	0.588972	0.519177	0.175169	0.133546	0.280268	0.157473	0.0724187	0.490826	0.138692	0.118828	0.239547	0.455973	0.121025	0.21571	0.208306
cg00288562	0.0382702	0.0127577	0.0293873	0.0115183	0.0111051	0.0119314	0.00965905	0.0149268	0.024636	0.0119314	0.0138939	0.0127577	0.0130676	0.0309367	0.0191617	0.0150301	0.0159597	0.0105887	0.012861	0.0145137	0.0502518	0.0170959	0.0137906	0.0247393	0.0127577	0.0256689	0.00986563	0.0120347	0.00955576	0.0112084	0.0105887	0.0107952	0.00924589	0.0150301	0.0148235	0.0141005	0.0151334	0.0331057	0.0126544	0.0215373	0.011415	0.0108985	0.0176123	0.017509	0.0127577	0.0122413	0.0225014	0.0144104	0.0218472
cg00290028	0.0368002	0.0252664	0.0291557	0.0330451	0.02473	0.0166831	0.018829	0.0274123	0.0366661	0.227779	0.0213771	0.0205725	0.0208407	0.0545033	0.0125256	0.012928	0.0223159	0.0397507	0.0274123	0.0225842	0.0256688	0.0288875	0.0243276	0.0304969	0.0217795	0.0350568	0.0255347	0.0211089	0.0140009	0.0137326	0.0241935	0.0382755	0.0194995	0.0263394	0.0418966	0.0225842	0.0170855	0.0287534	0.0252664	0.0211089	0.0255347	0.0211089	0.0304969	0.0349226	0.0240594	0.0169514	0.0262946	0.00675872	0.0477976
cg00290506	0.0298904	0.447327	0.535294	0.637365	0.450127	0.624337	0.490826	0.478336	0.380572	0.672896	0.0186927	0.373143	0.688616	0.017293	0.677418	0.349778	0.467354	0.016647	0.606571	0.520866	0.0607917	0.0491634	0.639949	0.452711	0.0194464	0.577716	0.655992	0.0125556	0.474675	0.0293521	0.688077	0.439144	0.305849	0.634027	0.545738	0.0648832	0.662775	0.017616	0.593328	0.01697	0.0206308	0.0801723	0.0944925	0.0167547	0.0149243	0.503746	0.605495	0.0442105	0.584714
cg00291877	0.0722555	0.0551247	0.079529	0.0486169	0.0451716	0.0270837	0.0345486	0.0342615	0.0464157	0.039238	0.0353142	0.0683317	0.0303376	0.0328259	0.0361755	0.0365583	0.0445017	0.0555075	0.0445974	0.0512966	0.0395251	0.0530192	0.0299548	0.0560817	0.0337829	0.0638337	0.0486169	0.045363	0.0346443	0.0311033	0.0400993	0.0434489	0.0313904	0.031199	0.064695	0.0314861	0.0406736	0.052445	0.0491911	0.0402907	0.0405779	0.0673747	0.0376111	0.036654	0.0413435	0.0343572	0.0451078	0.0330173	0.0807731
cg00292662	0.0342343	0.0651198	0.0498829	0.0740148	0.0633079	0.0603428	0.0460119	0.0554012	0.0739325	0.0542481	0.0428822	0.0740972	0.0534245	0.0424704	0.0502124	0.0484004	0.0376111	0.0601781	0.0460943	0.0507066	0.0559777	0.0409879	0.0516949	0.0614959	0.0542481	0.0525185	0.0502947	0.0527656	0.0538363	0.0520243	0.0541657	0.0649551	0.0509536	0.0515302	0.0675907	0.0605899	0.0550717	0.0670141	0.0946052	0.0500477	0.0536716	0.07245	0.032587	0.0526009	0.0558953	0.0511184	0.0503222	0.0362933	0.0490593
cg00292971	0.881021	0.837744	0.846007	0.831443	0.74241	0.850965	0.812852	0.900852	0.908289	0.936176	0.849312	0.811509	0.943613	0.926674	0.937932	0.916965	0.809547	0.9212	0.916035	0.912007	0.899199	0.85458	0.84673	0.903228	0.937209	0.91304	0.862533	0.812025	0.932148	0.951566	0.931941	0.840016	0.818223	0.831856	0.913143	0.852411	0.568269	0.860674	0.938552	0.853547	0.939378	0.849002	0.887941	0.906016	0.895481	0.892073	0.636231	0.924092	0.909631
cg00293409	0.066734	0.0409381	0.0397289	0.100793	0.0448679	0.526022	0.0349929	0.0332799	0.0513169	0.545671	0.0485962	0.0468832	0.87346	0.0661294	0.038822	0.041845	0.0419457	0.0537353	0.033683	0.0358998	0.0561536	0.0477901	0.387671	0.0481932	0.0512161	0.471709	0.117217	0.0610911	0.0408373	0.0364037	0.0334815	0.0354968	0.360263	0.0363029	0.700446	0.0537353	0.0345899	0.0378144	0.05041	0.0366052	0.0380159	0.0488985	0.045271	0.0773143	0.038822	0.444402	0.0711005	0.0552467	0.0492008
cg00294382	0.375256	0.235752	0.0886111	0.208489	0.299655	0.0786534	0.460717	0.264368	0.551109	0.18142	0.308066	0.206653	0.496197	0.148647	0.0389196	0.322374	0.220381	0.566771	0.159765	0.219994	0.293468	0.271716	0.469418	0.318797	0.627	0.14681	0.381346	0.380476	0.729863	0.022678	0.228308	0.112683	0.264948	0.0882244	0.118097	0.304585	0.182	0.454047	0.244356	0.529647	0.575858	0.237589	0.526264	0.273359	0.385697	0.195051	0.201625	0.372935	0.613272
cg00295206	0.0273905	0.0622118	0.0508279	0.0412018	0.0351751	0.0461404	0.0205267	0.0535065	0.0480656	0.0522509	0.0283113	0.0448011	0.0326639	0.0746001	0.0259675	0.0381047	0.0290646	0.0346728	0.0286461	0.029818	0.0460567	0.0360121	0.048819	0.0397788	0.0321617	0.0365144	0.033501	0.0482331	0.034338	0.0273905	0.0247957	0.0279764	0.029818	0.0402811	0.0334173	0.0294831	0.0327476	0.0482331	0.0376025	0.0452197	0.0418715	0.0403648	0.0388581	0.0377699	0.0266372	0.0328313	0.0396951	0.0288972	0.0531716
cg00295325	0.461327	0.74372	0.740888	0.725482	0.78733	0.766601	0.763543	0.862091	0.713702	0.911366	0.79979	0.699656	0.906042	0.893581	0.807493	0.819387	0.729107	0.876817	0.727635	0.830488	0.685837	0.570523	0.734998	0.708265	0.879762	0.796505	0.668166	0.72333	0.878629	0.892789	0.857787	0.747118	0.78801	0.785291	0.842382	0.732279	0.560895	0.748704	0.778721	0.772038	0.539146	0.71676	0.532123	0.826297	0.743153	0.783705	0.795448	0.830148	0.581624
cg00297584	0.0330566	0.100926	0.0466901	0.0470882	0.0330566	0.0248964	0.0595275	0.120729	0.0464911	0.0989353	0.0645033	0.0608212	0.184319	0.0241003	0.0206173	0.0192241	0.0337532	0.0446999	0.038729	0.116947	0.0623139	0.049377	0.146205	0.0427096	0.0357435	0.0446999	0.0887848	0.133666	0.0248964	0.0444013	0.0421125	0.0407193	0.0640057	0.0300712	0.178249	0.0859984	0.0370372	0.0857994	0.0647023	0.153867	0.0425105	0.0412168	0.0243989	0.065996	0.0271853	0.0853018	0.0286117	0.0376343	0.0395251
cg00298357	0.832313	0.805826	0.756091	0.814753	0.788758	0.788856	0.826133	0.831332	0.674377	0.850068	0.794545	0.810535	0.822797	0.853011	0.845163	0.670649	0.555385	0.68762	0.620423	0.79533	0.743535	0.754326	0.649754	0.657798	0.824563	0.793662	0.713125	0.738434	0.647008	0.685952	0.724504	0.885187	0.751873	0.756876	0.80769	0.807396	0.514184	0.687522	0.785128	0.798862	0.791799	0.808279	0.696056	0.591779	0.794349	0.727153	0.565097	0.788169	0.648087
cg00302793	0.0595481	0.060364	0.0704006	0.0797027	0.0491852	0.0640359	0.0734197	0.0742356	0.0791315	0.0818242	0.061588	0.091616	0.0572633	0.0817426	0.0620776	0.0597929	0.056529	0.0631384	0.0714613	0.0731749	0.0560394	0.0622408	0.069095	0.0677078	0.069911	0.0625672	0.0666471	0.0836194	0.0455133	0.0432285	0.0735829	0.0545706	0.0643623	0.0615064	0.0635464	0.0542442	0.0676262	0.0610984	0.0945535	0.0575081	0.0697478	0.0672182	0.0637911	0.076194	0.0659127	0.0723589	0.0663751	0.0529387	0.0690134
cg00303548	0.0485766	0.0278781	0.0247905	0.0299365	0.0363405	0.0294791	0.0301652	0.0469756	0.0356543	0.0768225	0.027192	0.0963775	0.927633	0.0361117	0.0410291	0.0278781	0.0234182	0.0267345	0.025934	0.0260484	0.0295934	0.025934	0.0273063	0.0367979	0.0266202	0.028793	0.387986	0.0308514	0.025934	0.0326811	0.436473	0.0330241	0.0969492	0.0322236	0.533447	0.0258197	0.027192	0.0309657	0.0329098	0.0283355	0.0416008	0.0254766	0.0231895	0.029136	0.025934	0.415774	0.0367216	0.0367979	0.0278781
cg00307685	0.880141	0.900134	0.728811	0.918106	0.908535	0.919063	0.866316	0.915129	0.89588	0.887585	0.913214	0.854831	0.916937	0.841644	0.918957	0.923105	0.91247	0.887266	0.914597	0.918425	0.807294	0.613	0.883544	0.921935	0.928316	0.919063	0.914065	0.795277	0.962559	0.891201	0.890244	0.917256	0.913321	0.882906	0.90258	0.923317	0.897263	0.790385	0.892158	0.923955	0.903537	0.910556	0.867273	0.812611	0.868975	0.879822	0.897333	0.851747	0.913533
cg00308133	0.0403945	0.0261365	0.0265786	0.0388471	0.0290102	0.810104	0.379049	0.026026	0.0309997	0.556887	0.021826	0.0297839	0.89532	0.0653736	0.0192839	0.0222681	0.0191733	0.0306681	0.0221576	0.0255839	0.0307787	0.0297839	0.529255	0.0276839	0.0243681	0.672387	0.269627	0.0244786	0.0175154	0.0228207	0.0389577	0.0288997	0.0242576	0.0240365	0.598445	0.0735526	0.0211628	0.0253629	0.0334313	0.0209418	0.0332103	0.0210523	0.0212734	0.0248102	0.0248102	0.362912	0.0321787	0.0282366	0.0263576
cg00308665	0.11432	0.308117	0.163137	0.186856	0.29451	0.186305	0.222986	0.409336	0.257185	0.256726	0.217286	0.417885	0.379549	0.0883033	0.196509	0.221791	0.0655957	0.0968531	0.151921	0.276675	0.286696	0.11432	0.122503	0.203496	0.126364	0.156242	0.114964	0.239258	0.172882	0.0782825	0.119193	0.15707	0.374585	0.094279	0.30067	0.251394	0.0896823	0.100898	0.280996	0.26785	0.177479	0.364196	0.0962096	0.340661	0.128294	0.28449	0.0838905	0.174905	0.15992
cg00309056	0.0668535	0.0495443	0.0766512	0.0570558	0.0481563	0.0466866	0.03942	0.0872653	0.0541982	0.0733036	0.0586071	0.0648123	0.0652206	0.0903679	0.0600768	0.0430941	0.0502791	0.0518304	0.0358275	0.0408897	0.0481563	0.0638326	0.0550146	0.0759164	0.0663636	0.0738752	0.0608933	0.0682415	0.0485645	0.0490544	0.0644857	0.050769	0.0346028	0.0576274	0.047993	0.0556678	0.0513405	0.0606483	0.0702827	0.0537899	0.0462784	0.0548513	0.0415428	0.0435024	0.0451353	0.0378687	0.0557495	0.0679966	0.0626895
cg00309204	0.0405865	0.0304187	0.0260281	0.0316897	0.0239484	0.0252193	0.0284545	0.0278768	0.0306498	0.0300721	0.0212909	0.0281079	0.0336539	0.0233706	0.0193267	0.0209442	0.0372357	0.0245261	0.0301876	0.0199044	0.0318052	0.0312275	0.0276457	0.0358492	0.0334228	0.0260281	0.0314586	0.0344627	0.0238328	0.0256815	0.017478	0.0263747	0.016207	0.0417419	0.0346938	0.0247572	0.0304187	0.0281079	0.0388533	0.0275302	0.035156	0.0244105	0.0277613	0.0430129	0.025797	0.0195577	0.0437061	0.029841	0.0308809
cg00311768	0.177337	0.441792	0.240457	0.316059	0.485226	0.234571	0.33118	0.23447	0.275265	0.249286	0.365378	0.598883	0.145269	0.137151	0.160796	0.237007	0.230005	0.221075	0.224322	0.352896	0.368321	0.139485	0.175206	0.27841	0.234673	0.238123	0.265624	0.372888	0.284195	0.139688	0.0990962	0.341531	0.506435	0.221988	0.344677	0.423425	0.213261	0.263594	0.310174	0.319307	0.171654	0.444837	0.18302	0.165362	0.30855	0.318901	0.142428	0.184136	0.269379
cg00312919	0.027819	0.0381386	0.0387066	0.0374759	0.0484581	0.0285764	0.0563161	0.0166474	0.043251	0.0309433	0.0325528	0.0402214	0.0355824	0.0479847	0.0289551	0.0448605	0.0450498	0.0285764	0.0418309	0.0545173	0.0855706	0.0442924	0.0327421	0.042683	0.0441978	0.0406001	0.0398427	0.0530972	0.0469433	0.0295232	0.0406001	0.0440084	0.0297125	0.0402214	0.0506356	0.0340676	0.0413575	0.0354877	0.0584936	0.0324581	0.0302806	0.0263989	0.0308486	0.0282924	0.0258309	0.0210025	0.0599769	0.0344463	0.0376652
cg00314943	0.918608	0.921608	0.89107	0.914429	0.908964	0.521399	0.932537	0.904035	0.877355	0.930501	0.904678	0.892249	0.921179	0.944431	0.946038	0.85421	0.909607	0.935538	0.886998	0.919251	0.855496	0.901035	0.900071	0.901356	0.922037	0.862996	0.891713	0.917751	0.919358	0.897178	0.860853	0.926966	0.922787	0.876497	0.921822	0.914215	0.896535	0.865461	0.583975	0.883462	0.902106	0.884212	0.902749	0.883248	0.930823	0.908	0.870354	0.883034	0.919894
cg00315936	0.0677293	0.0677293	0.0470507	0.0672098	0.0387377	0.039569	0.0434138	0.0398808	0.0486094	0.0678333	0.0433099	0.0878884	0.0447646	0.040816	0.0435177	0.0582733	0.0465312	0.0433099	0.047882	0.0434138	0.0587929	0.0481938	0.0435177	0.077601	0.0404003	0.0559872	0.0511033	0.0620141	0.0488172	0.0328147	0.0451803	0.0782245	0.0453881	0.0679372	0.0382181	0.0469468	0.0621181	0.0452842	0.0677293	0.047882	0.0425825	0.0521424	0.0468429	0.0639885	0.0556755	0.0516229	0.0479513	0.044349	0.0519346
cg00317680	0.194314	0.054869	0.0960075	0.0425274	0.0432367	0.0741616	0.0496203	0.0630967	0.110903	0.0513226	0.0731686	0.0266395	0.070757	0.0395485	0.101398	0.0604014	0.0384136	0.043946	0.0907588	0.0572806	0.0455064	0.0879217	0.0879217	0.0978517	0.0525993	0.138706	0.0748708	0.0418182	0.0891984	0.0345835	0.0395485	0.056855	0.036002	0.113882	0.0643734	0.063806	0.0445134	0.0633804	0.0738778	0.0801196	0.0347253	0.0335905	0.132607	0.0971424	0.0368532	0.0581317	0.0698586	0.0450809	0.072743
cg00318573	0.0948678	0.442519	0.563845	0.603233	0.611498	0.610784	0.440784	0.324152	0.477825	0.759763	0.600069	0.421397	0.783028	0.15599	0.754967	0.277112	0.365887	0.517723	0.608539	0.564049	0.256602	0.473029	0.575376	0.446295	0.250887	0.5266	0.63609	0.283234	0.595886	0.702824	0.743538	0.797211	0.433438	0.52007	0.683334	0.562212	0.12548	0.378234	0.471601	0.433642	0.829966	0.385173	0.599253	0.566498	0.272826	0.546906	0.365037	0.48405	0.408336
cg00318865	0.0384508	0.0338217	0.0429145	0.0474608	0.0328298	0.0346484	0.0268782	0.0453116	0.0380375	0.0350617	0.0377895	0.0476262	0.0255556	0.0331605	0.0425838	0.0272089	0.0287794	0.0283661	0.0335738	0.0314246	0.0348963	0.0264649	0.035475	0.0316726	0.0243984	0.0286141	0.0284488	0.0323338	0.034483	0.0322512	0.0283661	0.0318379	0.0346484	0.0334911	0.0375415	0.0275395	0.0250597	0.0262169	0.0462209	0.035723	0.0367149	0.0459729	0.025721	0.0382028	0.035475	0.0476262	0.0412888	0.0228278	0.0388641
cg00319761	0.016565	0.0123078	0.0140455	0.00996204	0.00978828	0.0100489	0.00848506	0.014393	0.0174338	0.0131767	0.0115259	0.0117866	0.00883258	0.00978828	0.00961452	0.0119603	0.00787689	0.0102227	0.0139586	0.0110915	0.0142192	0.0108309	0.011439	0.0160437	0.00996204	0.0154356	0.0135242	0.0161306	0.00987516	0.0100489	0.00926699	0.00918011	0.0087457	0.0124816	0.0130898	0.0109177	0.00987516	0.016565	0.0133504	0.0145668	0.0131767	0.0119603	0.00935387	0.0121341	0.00848506	0.0112653	0.0141324	0.0100489	0.014393
cg00320243	0.0207219	0.0562636	0.0779333	0.0497791	0.0237589	0.04075	0.0315568	0.045757	0.03681	0.0622556	0.0379592	0.0602856	0.0393546	0.035743	0.0312284	0.0441975	0.032788	0.0336909	0.0402575	0.0461674	0.0398471	0.0475628	0.0369742	0.0425558	0.0531444	0.0360713	0.0317209	0.0484657	0.0444437	0.0336088	0.0461674	0.0391904	0.0375488	0.030736	0.0382054	0.0485478	0.0390263	0.0481374	0.0493686	0.0249081	0.0354146	0.0542115	0.0306539	0.0444437	0.027781	0.0551965	0.0545946	0.0316389	0.030818
cg00321065	0.0337107	0.0297175	0.0266699	0.030348	0.0290869	0.0265649	0.0350769	0.0350769	0.0298225	0.0402261	0.0298225	0.0285615	0.0251987	0.0288768	0.0193139	0.0329751	0.0296124	0.036443	0.0258293	0.0265649	0.0329751	0.0338158	0.0266699	0.0290869	0.0237275	0.0358125	0.0234123	0.0345514	0.0167918	0.0236224	0.0215207	0.0268801	0.0240428	0.0253038	0.0489483	0.0196292	0.0271954	0.0319243	0.0348667	0.0309785	0.0477923	0.0304531	0.0295073	0.0263547	0.030348	0.0276157	0.0335006	0.0270903	0.0296124
cg00321478	0.235773	0.538444	0.439846	0.834682	0.464579	0.574267	0.39526	0.776565	0.561513	0.857751	0.586135	0.696933	0.87716	0.427868	0.593233	0.852205	0.274037	0.549535	0.270821	0.627282	0.684622	0.424097	0.314408	0.479108	0.276477	0.667209	0.560958	0.59534	0.985407	0.169561	0.568722	0.354779	0.77346	0.610867	0.657006	0.687284	0.277919	0.390713	0.561735	0.488757	0.132406	0.617411	0.34025	0.38794	0.569831	0.632716	0.251633	0.412784	0.873389
cg00323915	0.804876	0.518198	0.207004	0.242614	0.766096	0.752359	0.559303	0.827595	0.691283	0.794627	0.426055	0.513971	0.877788	0.121729	0.776029	0.852322	0.315737	0.724568	0.537958	0.709141	0.658737	0.621859	0.685788	0.268292	0.213344	0.443807	0.172239	0.62767	0.876731	0.740207	0.557929	0.383893	0.562895	0.722983	0.772647	0.531089	0.343105	0.329791	0.619217	0.685471	0.389388	0.5667	0.72647	0.626085	0.709035	0.716115	0.876273	0.505517	0.8482
cg00324733	0.0221066	0.048809	0.0473201	0.0606216	0.025978	0.0311398	0.0593312	0.042456	0.0434487	0.0589341	0.025978	0.0391803	0.0365994	0.0325295	0.0299486	0.0349119	0.0260772	0.0572466	0.0305442	0.0449377	0.0438458	0.0238934	0.0382869	0.0541694	0.037592	0.0427538	0.0285589	0.0442428	0.0473201	0.0406693	0.0368972	0.0401729	0.0455333	0.0330258	0.0282611	0.0305442	0.0324302	0.0518863	0.0408678	0.0352097	0.0427538	0.0438458	0.0134705	0.0366986	0.0279633	0.0457318	0.0365994	0.0302464	0.0411656
cg00327185	0.0751189	0.0512023	0.0387751	0.0376027	0.0270512	0.0237685	0.0270512	0.0444025	0.0436991	0.0329131	0.0312718	0.0727742	0.0422922	0.0784016	0.0458094	0.059409	0.0460438	0.0418232	0.029396	0.049092	0.0549539	0.044637	0.0303339	0.0373682	0.039713	0.0608159	0.0408853	0.0507334	0.0202514	0.0345545	0.0422922	0.0361958	0.024472	0.0383061	0.03432	0.0347889	0.044168	0.0444025	0.0528437	0.0481541	0.0404164	0.0453404	0.0235341	0.0415888	0.0263478	0.0399474	0.03135	0.0371337	0.0509678
cg00327483	0.905991	0.860496	0.826463	0.881656	0.850709	0.859614	0.908547	0.871429	0.826375	0.879805	0.860319	0.866932	0.901847	0.889856	0.881303	0.857762	0.852825	0.899202	0.764745	0.85935	0.834222	0.871164	0.817205	0.848417	0.910928	0.832899	0.839688	0.874338	0.898055	0.883948	0.841099	0.900171	0.871517	0.852649	0.838277	0.866932	0.825934	0.818087	0.86702	0.854412	0.886417	0.858732	0.892853	0.835103	0.894088	0.869401	0.872986	0.8858	0.84683
cg00328227	0.542975	0.497739	0.678892	0.334617	0.283371	0.705675	0.499848	0.416336	0.60234	0.41138	0.62016	0.384281	0.151671	0.430677	0.226115	0.42435	0.407901	0.209138	0.319433	0.337148	0.554784	0.187944	0.419921	0.394615	0.550672	0.660123	0.228962	0.278837	0.714111	0.111286	0.245306	0.441432	0.290436	0.345161	0.648102	0.484769	0.215359	0.246044	0.557631	0.217574	0.144923	0.253636	0.612251	0.186995	0.584309	0.38175	0.126505	0.450711	0.238874
cg00331237	0.0925518	0.0501261	0.035842	0.0678212	0.0245427	0.380045	0.0439434	0.0535372	0.036375	0.0570549	0.0275274	0.0939375	0.0741104	0.0193195	0.0441566	0.0481007	0.0264615	0.0300858	0.05439	0.0378674	0.0871153	0.0376542	0.179962	0.0380806	0.119627	0.182093	0.225052	0.0371212	0.0179337	0.0182535	0.0348827	0.0187865	0.0542834	0.0978816	0.146597	0.10609	0.014949	0.0326441	0.109927	0.0447962	0.0274208	0.0415983	0.0184667	0.0285934	0.0323243	0.0352024	0.0268523	0.0249691	0.0324309
cg00331433	0.14658	0.0786336	0.068626	0.0656413	0.0501911	0.0716108	0.0614276	0.0815305	0.0576528	0.0799504	0.0608131	0.0767901	0.0771413	0.0940839	0.0532636	0.0415881	0.0515078	0.0788092	0.0433438	0.0554582	0.0670459	0.0777558	0.0679238	0.0594963	0.0626566	0.0511567	0.0645001	0.0693283	0.0482598	0.0520346	0.0561605	0.0455384	0.0530002	0.0810038	0.0414125	0.0820573	0.0512445	0.0611643	0.095664	0.0625688	0.0697673	0.055546	0.0573895	0.0844275	0.0529124	0.0632711	0.0657584	0.0691528	0.0398323
cg00332153	0.720863	0.573447	0.613886	0.102524	0.11395	0.794011	0.651188	0.808237	0.097931	0.509485	0.674488	0.106444	0.811262	0.0651097	0.04237	0.0841527	0.532449	0.132657	0.0693664	0.18116	0.109469	0.0660058	0.746291	0.477896	0.098043	0.545331	0.523487	0.531777	0.0587246	0.15226	0.588346	0.640546	0.414158	0.616014	0.572103	0.162229	0.161781	0.719743	0.152596	0.460533	0.721199	0.485065	0.0568203	0.0493151	0.716382	0.622735	0.0677981	0.839378	0.103084
cg00332745	0.03601	0.0289604	0.0257329	0.0404266	0.0234396	0.0243739	0.0290453	0.0267521	0.0321879	0.0289604	0.0259027	0.0285357	0.0289604	0.0324427	0.0282809	0.0198724	0.0212313	0.0270918	0.028111	0.0289604	0.0380484	0.0266671	0.0259877	0.030744	0.0276014	0.0343962	0.0298947	0.0301495	0.0245438	0.0263274	0.0274316	0.0338866	0.0304892	0.0301495	0.0370292	0.0252232	0.0296399	0.0379635	0.0350757	0.0195326	0.0340565	0.0295549	0.0275165	0.0276864	0.0285357	0.0293001	0.0301778	0.0220807	0.0379635
cg00333226	0.749472	0.468384	0.62473	0.630046	0.599722	0.683704	0.485712	0.111979	0.415416	0.711862	0.590665	0.351027	0.752721	0.285259	0.702509	0.612522	0.26163	0.794859	0.593815	0.496936	0.216932	0.600609	0.72348	0.639104	0.240167	0.622859	0.643732	0.579244	0.608485	0.324542	0.692565	0.631326	0.328973	0.663816	0.595489	0.500087	0.722594	0.226777	0.574912	0.60563	0.860036	0.442589	0.657121	0.649737	0.136298	0.475571	0.578916	0.519974	0.63743
cg00333528	0.480563	0.268136	0.339227	0.606959	0.213784	0.155513	0.426423	0.711318	0.516797	0.552819	0.313588	0.37917	0.289114	0.705173	0.583121	0.616706	0.309244	0.505672	0.519128	0.404809	0.302251	0.196938	0.254257	0.337002	0.51881	0.259872	0.260931	0.303311	0.829981	0.38754	0.143646	0.207321	0.328844	0.323335	0.452274	0.470074	0.126801	0.147461	0.415404	0.559176	0.809427	0.469226	0.232113	0.260402	0.261885	0.340287	0.406363	0.380653	0.35745
cg00334507	0.5885	0.762429	0.414059	0.802582	0.562072	0.821941	0.764682	0.81682	0.684786	0.738357	0.815591	0.591265	0.83495	0.895795	0.530523	0.861787	0.537796	0.623531	0.759868	0.655285	0.648013	0.861275	0.65928	0.742352	0.856256	0.742864	0.805962	0.837409	0.888522	0.579998	0.848471	0.59229	0.644018	0.609191	0.741533	0.683761	0.567911	0.725041	0.758844	0.756488	0.929802	0.610625	0.662968	0.273727	0.689907	0.675976	0.63753	0.641047	0.692673
cg00335286	0.819836	0.532744	0.359963	0.596475	0.516457	0.457683	0.688834	0.635219	0.395773	0.694802	0.649584	0.511804	0.731624	0.877699	0.222284	0.655046	0.281867	0.521009	0.257184	0.533452	0.462337	0.768649	0.721306	0.390108	0.318386	0.39638	0.263861	0.503306	0.885995	0.384848	0.14692	0.438969	0.491268	0.470025	0.494404	0.459403	0.205188	0.298862	0.437552	0.497136	0.3283	0.501587	0.497641	0.696724	0.577153	0.618022	0.238065	0.797985	0.621259
cg00336605	0.0397416	0.0431133	0.0254348	0.0398328	0.0342741	0.0275307	0.0338184	0.0273485	0.0371901	0.0422021	0.0353676	0.0509502	0.0259816	0.0281686	0.0314492	0.0361877	0.0357321	0.0329072	0.0424754	0.0370079	0.0364611	0.0317225	0.0415642	0.0346386	0.0270751	0.0423843	0.0401973	0.037099	0.0271662	0.0267106	0.040015	0.0643457	0.0315403	0.047214	0.0338184	0.0287154	0.0289888	0.0402884	0.0359143	0.0458471	0.0268929	0.0346386	0.0311758	0.0427488	0.0275307	0.0384659	0.0507375	0.026984	0.0348208
cg00338702	0.100868	0.24369	0.762265	0.349012	0.266619	0.719515	0.544228	0.736443	0.43837	0.426048	0.204583	0.187761	0.887408	0.0600462	0.829872	0.452299	0.0907964	0.376012	0.386298	0.513906	0.584407	0.839622	0.810051	0.120582	0.475227	0.398298	0.509192	0.0590819	0.493013	0.37087	0.859444	0.390048	0.298762	0.722943	0.654586	0.465156	0.0902607	0.0388318	0.627371	0.47962	0.473084	0.112654	0.727657	0.792694	0.0819035	0.582157	0.572335	0.755408	0.661443
cg00338893	0.0261212	0.0243878	0.0194186	0.035944	0.0382553	0.0250811	0.0262368	0.0201119	0.0253123	0.0669149	0.0216143	0.0284325	0.0228854	0.0362907	0.0204586	0.0251967	0.0227699	0.0279702	0.0227699	0.0258901	0.0282013	0.0254278	0.0219609	0.0250811	0.0238099	0.0260056	0.0201119	0.0314371	0.0224232	0.0199964	0.0245033	0.0402199	0.0219609	0.0221921	0.0257745	0.0235788	0.0314371	0.0282013	0.0353662	0.0271613	0.0373308	0.0300503	0.0197652	0.0210364	0.0265835	0.0318993	0.0295496	0.0186096	0.0270457
cg00342530	0.46873	0.493782	0.538317	0.633062	0.365528	0.419163	0.508662	0.552234	0.560585	0.606084	0.482648	0.582745	0.665714	0.704361	0.373879	0.503845	0.547524	0.682415	0.308253	0.601373	0.402034	0.54367	0.453635	0.426229	0.636916	0.415095	0.553412	0.543242	0.516049	0.387796	0.724488	0.504166	0.575144	0.620001	0.720098	0.609188	0.433188	0.502453	0.650298	0.3211	0.417343	0.642269	0.584244	0.572361	0.564653	0.469373	0.442716	0.590775	0.685198
cg00343092	0.024502	0.0465447	0.061755	0.0233633	0.0233633	0.0117319	0.0419898	0.0314158	0.0305211	0.0260475	0.0446739	0.0567934	0.0110812	0.0213298	0.0167749	0.0210045	0.0354014	0.0165309	0.0236887	0.0724103	0.0460567	0.0199471	0.0162869	0.040607	0.0198657	0.0226313	0.0221432	0.0190524	0.0245834	0.007665	0.0127893	0.017995	0.0764772	0.0349133	0.0224686	0.0586641	0.024258	0.0402817	0.0249087	0.0164495	0.013684	0.0292197	0.0281623	0.0259661	0.0212485	0.0780227	0.0250443	0.0162869	0.0397936
cg00344358	0.898493	0.889375	0.862124	0.907104	0.903659	0.901127	0.90609	0.898594	0.834569	0.923515	0.884411	0.882892	0.894136	0.882892	0.91227	0.875901	0.901127	0.911966	0.836595	0.890287	0.878941	0.899404	0.842673	0.856552	0.929796	0.835886	0.892009	0.909231	0.906901	0.892009	0.857667	0.931518	0.895352	0.863542	0.913283	0.898999	0.871039	0.777939	0.897277	0.872255	0.894238	0.900215	0.87965	0.853817	0.906192	0.876813	0.876307	0.76558	0.862732
cg00344372	0.575866	0.568066	0.438866	0.532666	0.604166	0.504266	0.635966	0.669566	0.468866	0.566366	0.614866	0.628266	0.757666	0.721066	0.475666	0.484666	0.453966	0.427266	0.490066	0.557066	0.527366	0.591466	0.572466	0.477666	0.628066	0.540166	0.568866	0.675066	0.527166	0.648566	0.487666	0.647266	0.700966	0.460966	0.611166	0.619666	0.396266	0.459266	0.530666	0.498066	0.584666	0.547166	0.423966	0.564166	0.536766	0.442366	0.495266	0.513266	0.546266
cg00346145	0.0297878	0.0571321	0.0499174	0.0819824	0.0548162	0.0482251	0.0889298	0.0563304	0.067286	0.0678204	0.0485814	0.0639013	0.0534802	0.0748568	0.0589134	0.0566867	0.0614074	0.0617637	0.057043	0.0700471	0.0642576	0.0501846	0.0497393	0.067286	0.0502737	0.0647029	0.0487595	0.0578446	0.0665734	0.0521442	0.0432372	0.0436826	0.0394073	0.0663953	0.0605167	0.0620309	0.0778852	0.0792212	0.0964116	0.0671969	0.0425247	0.0587353	0.0465328	0.0693345	0.0528567	0.0384275	0.058379	0.0727192	0.0615855
cg00347729	0.0782851	0.359512	0.347082	0.203921	0.219837	0.290569	0.412717	0.450989	0.229226	0.285203	0.320524	0.515997	0.1331	0.160015	0.112265	0.351285	0.152593	0.134888	0.16243	0.406368	0.366039	0.1407	0.106095	0.212952	0.157154	0.266157	0.266962	0.256052	0.189166	0.0849022	0.119418	0.369974	0.573315	0.162877	0.364072	0.428097	0.151163	0.175932	0.364609	0.237543	0.353878	0.478619	0.167616	0.106542	0.217691	0.240493	0.128062	0.160194	0.185589
cg00347904	0.396309	0.409834	0.548832	0.729134	0.716337	0.814863	0.647046	0.800402	0.272917	0.89539	0.110094	0.0866847	0.931284	0.858144	0.864282	0.828492	0.763675	0.918279	0.493587	0.30184	0.207372	0.640387	0.860953	0.404112	0.655369	0.736625	0.839105	0.639347	0.924522	0.62062	0.944185	0.522822	0.267715	0.896639	0.752959	0.37342	0.101667	0.0783615	0.443543	0.694801	0.960728	0.164715	0.80113	0.91932	0.0917827	0.67805	0.449543	0.7128	0.130382
cg00350296	0.796178	0.443427	0.585941	0.643011	0.682254	0.713453	0.54898	0.704539	0.669753	0.805092	0.653012	0.411032	0.80194	0.847814	0.785851	0.592137	0.719214	0.809332	0.712909	0.519521	0.62964	0.821833	0.754327	0.706713	0.769654	0.676493	0.548872	0.665731	0.825638	0.733564	0.777372	0.620618	0.379073	0.744108	0.690842	0.514629	0.730302	0.591702	0.636706	0.650621	0.889666	0.444188	0.769654	0.746826	0.65486	0.61877	0.808607	0.740521	0.658665
cg00350478	0.309938	0.476639	0.324343	0.38765	0.348889	0.320931	0.350784	0.262268	0.315719	0.249948	0.35647	0.563733	0.267386	0.237249	0.236965	0.29269	0.300177	0.256772	0.247674	0.437878	0.389924	0.200383	0.212419	0.290984	0.232131	0.333251	0.316667	0.47228	0.214315	0.171194	0.173184	0.464129	0.547717	0.229667	0.448398	0.499479	0.295343	0.273925	0.406414	0.317899	0.179629	0.428401	0.245115	0.215547	0.296765	0.34832	0.187305	0.303683	0.361777
cg00350702	0.166296	0.026563	0.0307673	0.0353839	0.0341473	0.033158	0.0282942	0.0306025	0.0461833	0.0320039	0.0313444	0.0296956	0.0199679	0.0348068	0.0261508	0.0235952	0.0310971	0.0376097	0.0276347	0.0279644	0.0332405	0.0264805	0.0228533	0.038599	0.0307673	0.0274698	0.0315093	0.0329107	0.0282942	0.0270576	0.0212045	0.0296956	0.0170826	0.0349717	0.0263981	0.0351366	0.0346419	0.0371151	0.0353839	0.0233479	0.0370326	0.0277996	0.0267279	0.0386814	0.0311795	0.0266454	0.0421438	0.0304376	0.0279644
cg00351011	0.00302024	0.0645639	0.675099	0.51868	0.551794	0.354092	0.0397286	0.0224092	0.285903	0.813763	0.414764	0.258236	0.417923	0.00552556	0.193424	0.162707	0.0157647	0.582293	0.0224092	0.488181	0.0458285	0.126217	0.670197	0.291676	0.00781302	0.734246	0.522819	0.0196861	0.004872	0.443956	0.553972	0.0148933	0.348645	0.154211	0.551794	0.430667	0.012279	0.537633	0.536871	0.483279	0.0373322	0.259543	0.383393	0.0472445	0.0199039	0.542535	0.108207	0.00922907	0.025677
cg00354258	0.825825	0.903739	0.828493	0.867171	0.898181	0.886289	0.897737	0.90874	0.887511	0.900293	0.893624	0.806708	0.95331	0.904294	0.855946	0.906406	0.924856	0.801817	0.771363	0.902627	0.872062	0.926079	0.911963	0.934081	0.919188	0.879731	0.861503	0.911519	0.951531	0.935193	0.819823	0.911296	0.84183	0.893847	0.888512	0.886622	0.911963	0.898181	0.867171	0.914409	0.911408	0.876397	0.897737	0.860169	0.886955	0.948864	0.906702	0.900738	0.891624
cg00354572	0.671952	0.508099	0.134878	0.406622	0.490617	0.409311	0.491341	0.700502	0.376934	0.73019	0.504685	0.209253	0.766188	0.602955	0.732983	0.586094	0.342694	0.740431	0.220632	0.442826	0.136533	0.762154	0.580405	0.584129	0.757912	0.415414	0.243389	0.350763	0.73019	0.74943	0.429069	0.491031	0.243493	0.630368	0.554648	0.370106	0.53158	0.528891	0.207805	0.50003	0.687054	0.331626	0.543476	0.37714	0.489272	0.485238	0.529994	0.68664	0.563234
cg00355802	0.0857927	0.0467965	0.0344119	0.0412695	0.0303178	0.0326719	0.0380965	0.0502765	0.0342072	0.0480247	0.0392224	0.0324672	0.0270425	0.0659364	0.0259166	0.0454659	0.0456706	0.0340025	0.0419859	0.0347189	0.0392224	0.0286801	0.026019	0.0345142	0.0312389	0.040553	0.0369707	0.0503788	0.0324672	0.0290895	0.0336954	0.0331836	0.0231531	0.0459777	0.0328766	0.0336954	0.0424977	0.0416789	0.0387107	0.0303178	0.045773	0.0410648	0.0368683	0.035333	0.0322625	0.0258143	0.0425318	0.0515047	0.0410648
cg00359325	0.0550293	0.0562643	0.0621746	0.0609396	0.0466491	0.0516772	0.0525594	0.0963129	0.0633213	0.0604985	0.0567054	0.0744361	0.0641152	0.054059	0.0384453	0.0484134	0.0454141	0.0617335	0.0603221	0.0721426	0.0551175	0.063586	0.0575875	0.0694962	0.0538825	0.0579403	0.0634977	0.0771707	0.0575875	0.0643799	0.0621746	0.0630567	0.0537943	0.0510597	0.0887266	0.041621	0.0661441	0.0738186	0.0800817	0.0467373	0.0639388	0.0535297	0.0464727	0.0683494	0.0508833	0.0591753	0.0706724	0.0501776	0.0596164
cg00359973	0.101676	0.0518809	0.0783386	0.0814586	0.0163128	0.0686042	0.101052	0.172937	0.0679802	0.055625	0.0281689	0.0334105	0.0297913	0.0386521	0.0400249	0.0297913	0.0370297	0.016812	0.0397753	0.0501337	0.0384025	0.0385273	0.060617	0.0477625	0.0594938	0.0586202	0.0290425	0.055625	0.0437689	0.0628634	0.0402745	0.0412729	0.0703514	0.0558746	0.0617402	0.0417721	0.267037	0.058121	0.100928	0.056873	0.0465145	0.0401497	0.0396505	0.0406489	0.0478873	0.0397753	0.467924	0.507777	0.0669818
cg00363813	0.743829	0.566049	0.647103	0.678159	0.729695	0.735656	0.638738	0.767193	0.595279	0.719022	0.641622	0.553935	0.753444	0.795268	0.749117	0.615951	0.696812	0.739117	0.675563	0.572491	0.574318	0.754597	0.671717	0.649699	0.716234	0.674121	0.671717	0.651045	0.749502	0.682678	0.743636	0.715176	0.435768	0.667583	0.686909	0.566915	0.672679	0.661045	0.615855	0.610951	0.810268	0.540378	0.716234	0.666621	0.678255	0.593163	0.749341	0.709023	0.644122
cg00364814	0.890477	0.92545	0.834166	0.943232	0.941652	0.916657	0.928611	0.911125	0.910334	0.941256	0.914385	0.941849	0.918633	0.935724	0.912705	0.926932	0.884155	0.936119	0.776867	0.884155	0.912409	0.932069	0.925944	0.915076	0.904308	0.894528	0.869138	0.926438	0.931377	0.929401	0.920411	0.894034	0.924758	0.911026	0.939577	0.910038	0.881685	0.896306	0.921992	0.906778	0.929599	0.931772	0.910532	0.883068	0.902431	0.917151	0.913628	0.940861	0.921498
cg00367281	0.412952	0.609835	0.436612	0.332467	0.364471	0.399221	0.468933	0.755597	0.460166	0.686624	0.522695	0.612898	0.512978	0.368484	0.390137	0.883613	0.424676	0.471468	0.396052	0.433021	0.534842	0.199591	0.457314	0.307751	0.621665	0.283034	0.333417	0.412635	0.189663	0.80355	0.347888	0.487628	0.656521	0.279232	0.590401	0.514774	0.293491	0.193571	0.53368	0.484671	0.183853	0.458159	0.236349	0.372076	0.364788	0.579838	0.373308	0.319475	0.508647
cg00367438	0.0537919	0.0700723	0.060304	0.0637271	0.0794231	0.0622243	0.0636436	0.0767514	0.0945346	0.0966219	0.064562	0.0826791	0.0430218	0.0653134	0.0628087	0.0555451	0.0678181	0.068486	0.0592187	0.068319	0.0906106	0.0567975	0.067985	0.0871876	0.0573819	0.0784212	0.0577159	0.0917795	0.060805	0.0619738	0.0619738	0.0660648	0.0549607	0.0688199	0.0660648	0.0780872	0.0663987	0.0809259	0.0716586	0.056714	0.0896088	0.0700723	0.0609719	0.0553782	0.0687364	0.0664822	0.0598309	0.0620573	0.0851003
cg00368022	0.281484	0.215953	0.0544619	0.0331282	0.018764	0.018254	0.0343181	0.0251386	0.0327032	0.0335531	0.0232687	0.0258186	0.0239487	0.0247986	0.0233537	0.0265835	0.0276885	0.0310883	0.0209739	0.0201239	0.0348281	0.0205489	0.0274335	0.0396728	0.0337231	0.0382279	0.0224188	0.0208039	0.0208889	0.018594	0.0245437	0.0225888	0.018849	0.036103	0.0308333	0.0291334	0.0241187	0.0404377	0.0290484	0.0281984	0.0316832	0.0258186	0.0342331	0.0372079	0.0255636	0.0232687	0.0268102	0.0230137	0.0434975
cg00368415	0.0386109	0.0458784	0.0347683	0.0310092	0.0369402	0.0391956	0.0269996	0.0447925	0.0361049	0.0398639	0.031594	0.0342671	0.0280855	0.0378591	0.0261642	0.0293385	0.0293385	0.0275008	0.0431218	0.0441242	0.0441242	0.0401145	0.026916	0.0418688	0.0350189	0.0369402	0.0243264	0.0510576	0.0369402	0.0308422	0.0268325	0.0264148	0.0300903	0.0257465	0.0362719	0.030508	0.0264984	0.042537	0.0470479	0.0349354	0.031761	0.0333482	0.0381097	0.0421194	0.0271666	0.0239923	0.0364668	0.0234076	0.0411169
cg00371195	0.808149	0.933264	0.904906	0.941983	0.929963	0.866643	0.959844	0.943676	0.931909	0.964416	0.951125	0.966447	0.965177	0.950956	0.925137	0.939105	0.783177	0.95231	0.942914	0.94994	0.936311	0.923106	0.950702	0.929878	0.960098	0.944269	0.921751	0.958659	0.947655	0.930978	0.938258	0.84675	0.94139	0.931486	0.968564	0.958151	0.883912	0.942406	0.901943	0.919127	0.932079	0.923614	0.893732	0.938682	0.933687	0.938004	0.908574	0.912355	0.942322
cg00374717	0.924281	0.919885	0.932654	0.836049	0.925641	0.932758	0.926583	0.941027	0.920722	0.95704	0.934119	0.872891	0.946051	0.930456	0.912558	0.931293	0.897173	0.946365	0.700929	0.926479	0.878543	0.930037	0.928362	0.936631	0.951284	0.920617	0.836468	0.946993	0.961331	0.934328	0.918315	0.947621	0.902092	0.904499	0.943748	0.896126	0.908267	0.916745	0.943434	0.943329	0.946469	0.940922	0.932654	0.918943	0.944062	0.945318	0.922048	0.950342	0.930874
cg00375964	0.0278736	0.0545722	0.0577256	0.046899	0.0379644	0.039436	0.0197799	0.0298707	0.0461632	0.0361775	0.042274	0.0283992	0.0340752	0.0525751	0.0344957	0.0427996	0.044061	0.0257713	0.031027	0.0397513	0.0573052	0.0311321	0.0299758	0.0554131	0.0477399	0.0343906	0.0333395	0.0361775	0.0371235	0.0493166	0.0279787	0.0309219	0.0365979	0.0322883	0.0277685	0.0305014	0.0259816	0.0340752	0.0323934	0.0393309	0.0341804	0.0246151	0.0474246	0.0435354	0.0362826	0.0367031	0.0521196	0.0393309	0.0352315
cg00376639	0.0926339	0.0565739	0.0373807	0.0696602	0.0365082	0.0461049	0.0315645	0.0402887	0.0574463	0.0597728	0.035345	0.0574463	0.0431968	0.0629717	0.0237127	0.041452	0.036799	0.0597728	0.0434876	0.0577371	0.0522118	0.0493037	0.0289473	0.0571555	0.0554107	0.0780936	0.0286565	0.0408703	0.0388347	0.0208047	0.0240035	0.0478497	0.0347634	0.0708234	0.0510486	0.0458141	0.0306921	0.0763488	0.0536658	0.0783844	0.060936	0.0751855	0.0455232	0.0853638	0.0801293	0.0530842	0.0648134	0.050467	0.0583187
cg00380464	0.0498795	0.0485495	0.0579426	0.0457232	0.0498795	0.0598544	0.0390732	0.0463882	0.0547007	0.0483832	0.0525395	0.0586076	0.0417332	0.0624313	0.0358314	0.0619326	0.0467207	0.0490482	0.0420657	0.0458895	0.0619326	0.0458063	0.040902	0.0527888	0.0363301	0.0530382	0.0461388	0.0567788	0.0432295	0.0486326	0.0451413	0.034917	0.0358314	0.0483001	0.046222	0.0476351	0.0431463	0.0590232	0.054202	0.0441438	0.0483001	0.0478845	0.0463051	0.0629301	0.0465545	0.0379926	0.0695246	0.0279345	0.0586076
cg00381076	0.0439174	0.0470374	0.0633904	0.0626373	0.0229383	0.0463919	0.0279948	0.0406899	0.0601629	0.0213245	0.0261658	0.0324058	0.0273493	0.0297161	0.0387533	0.0350954	0.0303617	0.0212169	0.0668332	0.0366016	0.062207	0.0150845	0.028963	0.0421961	0.0308996	0.0435947	0.0664028	0.062207	0.0334816	0.0161604	0.0328361	0.0218624	0.0271341	0.0265962	0.0901792	0.0362789	0.0297161	0.0888882	0.0504802	0.0233686	0.0313299	0.0499422	0.0233686	0.0355258	0.0279948	0.0435947	0.0403671	0.0205714	0.0420885
cg00382515	0.0260566	0.026801	0.0287036	0.0368928	0.0219206	0.0363965	0.02829	0.0431795	0.0329223	0.0318469	0.0244849	0.0376373	0.0238231	0.0325914	0.0226651	0.0279591	0.0242367	0.0222515	0.0244022	0.0281245	0.0331704	0.0287863	0.0277109	0.0274628	0.0268837	0.02829	0.0236577	0.033005	0.0224996	0.0160475	0.0161302	0.0206798	0.0239886	0.0329223	0.0706423	0.022086	0.0220033	0.0299444	0.0310197	0.02829	0.0287863	0.0237404	0.0304407	0.0203489	0.0224996	0.0252294	0.0301649	0.0250639	0.0273801
cg00386408	0.0258609	0.14341	0.166016	0.164006	0.0863435	0.0364102	0.143611	0.0917688	0.319432	0.0521839	0.159586	0.285876	0.0401276	0.0132018	0.0924721	0.154562	0.0232487	0.0272675	0.155567	0.235541	0.193343	0.0243539	0.0391229	0.0754928	0.04706	0.0691632	0.0608243	0.0905632	0.106739	0.0579107	0.0206365	0.0701679	0.176565	0.0510788	0.106236	0.209117	0.0889557	0.073383	0.303056	0.0538919	0.0188281	0.379915	0.100007	0.0249567	0.0802149	0.233531	0.0538919	0.0524853	0.0950843
cg00387170	0.0429941	0.111138	0.0564596	0.119217	0.159124	0.137253	0.0849413	0.180587	0.10061	0.120849	0.0980804	0.145087	0.0991413	0.145985	0.109587	0.165816	0.147291	0.115708	0.177405	0.13252	0.0632332	0.102895	0.0608665	0.0935919	0.104772	0.0926126	0.136518	0.11481	0.098162	0.158798	0.0688642	0.134641	0.0718838	0.0968563	0.149168	0.108608	0.127378	0.0860838	0.17765	0.0718838	0.233062	0.135213	0.126072	0.102406	0.142639	0.11024	0.133635	0.110485	0.0939999
cg00392257	0.106153	0.419697	0.260408	0.272843	0.2384	0.294161	0.367291	0.218464	0.246197	0.18787	0.260507	0.461937	0.178691	0.385352	0.114048	0.259125	0.235044	0.204943	0.195864	0.300082	0.369857	0.237216	0.422164	0.239979	0.23238	0.234748	0.253895	0.29199	0.196851	0.464602	0.183823	0.274916	0.427099	0.223892	0.343013	0.427987	0.268797	0.208299	0.358607	0.465292	0.169316	0.398675	0.147011	0.181356	0.311827	0.267909	0.183231	0.217576	0.249059
cg00393585	0.910567	0.343797	0.528026	0.728124	0.489142	0.728124	0.40286	0.390038	0.532755	0.72928	0.0568918	0.361033	0.842466	0.900688	0.634276	0.621139	0.0569969	0.782247	0.564914	0.473483	0.09977	0.780251	0.697647	0.0753883	0.349472	0.575003	0.663282	0.479683	0.583726	0.312164	0.791391	0.439117	0.218526	0.729596	0.619878	0.470435	0.0767545	0.634906	0.221153	0.575213	0.98203	0.0845314	0.297031	0.781196	0.229876	0.4821	0.785225	0.376586	0.0732864
cg00394658	0.663719	0.382715	0.472168	0.622036	0.179338	0.704581	0.493009	0.320074	0.417255	0.295252	0.269728	0.399575	0.770617	0.189056	0.600376	0.363981	0.187183	0.43189	0.187534	0.328153	0.477436	0.536213	0.273943	0.29455	0.714299	0.691702	0.577895	0.494063	0.538086	0.381193	0.287291	0.356956	0.322182	0.632223	0.711606	0.445941	0.256731	0.311527	0.621334	0.492775	0.528134	0.423109	0.344545	0.2853	0.361054	0.396531	0.162127	0.500971	0.514318
cg00396163	0.0375808	0.0203109	0.20047	0.020413	0.0161211	0.0166321	0.0211284	0.0184715	0.0482084	0.0182671	0.182587	0.0256247	0.019289	0.0294057	0.199346	0.0159167	0.0193912	0.0158145	0.186368	0.271695	0.0199021	0.0181649	0.0197999	0.0227634	0.0180627	0.0202087	0.0197999	0.0168364	0.014997	0.0177561	0.022559	0.0266466	0.0372742	0.0224568	0.0255225	0.0207196	0.277929	0.0256247	0.0203109	0.0177561	0.0160189	0.0232743	0.0240918	0.270571	0.0175518	0.0236831	0.0286903	0.0173474	0.0218437
cg00396894	0.776412	0.572714	0.770638	0.580919	0.486211	0.291528	0.791707	0.819968	0.692036	0.870107	0.607052	0.659015	0.455722	0.841036	0.808116	0.755749	0.714827	0.85076	0.630451	0.642302	0.512749	0.619207	0.384007	0.637845	0.734173	0.787149	0.419054	0.621436	0.544859	0.815916	0.174435	0.633793	0.719486	0.710572	0.669853	0.775906	0.399303	0.51356	0.74805	0.732249	0.654558	0.594593	0.62731	0.777931	0.763852	0.553671	0.810007	0.770942	0.37712
cg00397740	0.018485	0.0338609	0.0429055	0.0451667	0.0377049	0.0232335	0.0227812	0.0141888	0.0363482	0.0336348	0.0257207	0.0571508	0.0487846	0.0309214	0.00401362	0.0370265	0.0650649	0.0352176	0.037931	0.0551158	0.0309214	0.028208	0.0377049	0.0634821	0.0169022	0.0207462	0.0144149	0.0191634	0.0377049	0.0273035	0.0209723	0.0668738	0.00401362	0.0390616	0.0327303	0.0200678	0.0128321	0.0557941	0.0447145	0.0196156	0.026173	0.0245902	0.0429055	0.0392877	0.0273035	0.000621884	0.0622008	0.0103449	0.0325042
cg00398048	0.433078	0.196732	0.483675	0.370562	0.15974	0.676732	0.307822	0.225517	0.296016	0.383493	0.193134	0.347737	0.0497753	0.450394	0.570815	0.474793	0.120949	0.327723	0.0711386	0.169635	0.348412	0.463661	0.190323	0.110829	0.4378	0.422846	0.375172	0.0769854	0.213823	0.0647296	0.321651	0.421834	0.238222	0.463549	0.651321	0.280274	0.155355	0.0144696	0.449157	0.117126	0.313106	0.127245	0.166262	0.289719	0.107231	0.173345	0.17818	0.316479	0.254413
cg00399483	0.72996	0.444286	0.642363	0.665247	0.618734	0.733153	0.465041	0.659499	0.59138	0.802123	0.56988	0.332848	0.870667	0.776153	0.808509	0.715271	0.149247	0.803932	0.600427	0.492182	0.215343	0.477281	0.787435	0.710908	0.79563	0.712504	0.651623	0.631507	0.753163	0.788925	0.734217	0.562749	0.348494	0.436942	0.693026	0.422254	0.6777	0.185222	0.635764	0.599895	0.911752	0.526667	0.655561	0.74337	0.327633	0.602662	0.82263	0.819365	0.628739
cg00400263	0.90854	0.943327	0.933828	0.969898	0.993773	0.96579	0.946151	0.903534	0.910722	0.94859	0.956163	0.952184	0.969384	0.964763	0.938962	0.991206	0.940503	0.928693	0.958602	0.9509	0.944867	0.918296	0.945894	0.915087	0.962324	0.909439	0.935496	0.946022	0.922917	0.948076	0.977728	0.95642	0.985045	0.903021	0.985943	0.946022	0.937807	0.895704	0.978627	0.950002	0.927923	0.962838	0.915472	0.92818	0.955136	0.958987	0.949317	0.885306	0.903406
cg00402366	0.0668329	0.033098	0.0509965	0.0521512	0.0271594	0.0434907	0.0445629	0.031201	0.0435732	0.0293864	0.033098	0.0546257	0.0209733	0.0328506	0.0292214	0.0396965	0.0439031	0.0207258	0.0336754	0.048522	0.0355725	0.0213857	0.0225404	0.0539658	0.0279017	0.0797	0.0246024	0.0307061	0.028809	0.0749161	0.0559454	0.0255097	0.102217	0.033263	0.0306236	0.0326856	0.026747	0.0594921	0.0341703	0.0307061	0.0335104	0.0321083	0.0249324	0.0622139	0.0408513	0.0639461	0.0438756	0.0324382	0.0362323
cg00404599	0.278894	0.45385	0.678488	0.731596	0.684484	0.70001	0.606321	0.69305	0.539187	0.797981	0.38875	0.406096	0.705363	0.892419	0.783419	0.356308	0.422264	0.846699	0.455564	0.53983	0.63673	0.803334	0.786203	0.735558	0.755794	0.662106	0.694656	0.618635	0.430723	0.378793	0.667567	0.500855	0.402884	0.494431	0.646688	0.523876	0.615315	0.313157	0.62356	0.42205	0.893489	0.566919	0.557389	0.778172	0.477728	0.567561	0.667674	0.651399	0.673884
cg00405070	0.116105	0.0289484	0.0270519	0.0442028	0.036287	0.0404098	0.0288659	0.029608	0.0387607	0.0541801	0.0403274	0.0612713	0.0259799	0.0527783	0.0245782	0.0431309	0.0319168	0.0426362	0.0303501	0.0376063	0.0444502	0.0411519	0.028701	0.0432958	0.034473	0.0450274	0.0278764	0.0395853	0.0348028	0.0271343	0.0319993	0.0327414	0.034308	0.0347203	0.0362045	0.0381835	0.0436256	0.0434607	0.04008	0.0272168	0.0295256	0.0377712	0.0275466	0.0448625	0.0333186	0.0360396	0.0417566	0.027794	0.0437905
cg00405568	0.0288924	0.047624	0.0538082	0.0443975	0.0344492	0.0588272	0.0284443	0.0305057	0.0695822	0.043322	0.0270103	0.0671623	0.0703888	0.0313123	0.0357935	0.0295198	0.0398267	0.0279962	0.0362417	0.0329255	0.102743	0.0219017	0.0287132	0.0612471	0.0409918	0.0465485	0.0338218	0.0584687	0.028265	0.0369587	0.0414399	0.0312227	0.0256659	0.042605	0.0298783	0.0420673	0.0270999	0.0556007	0.0431428	0.0345388	0.037586	0.0339114	0.0428739	0.0366002	0.033284	0.0391993	0.0324774	0.0243215	0.0746908
cg00407150	0.7694	0.641466	0.360751	0.43899	0.531809	0.618056	0.772583	0.732847	0.501314	0.701223	0.798149	0.63664	0.55296	0.637154	0.484372	0.383956	0.521746	0.62052	0.4317	0.561584	0.512403	0.446793	0.603168	0.35459	0.571647	0.503367	0.357465	0.444842	0.563227	0.619596	0.240826	0.493613	0.656251	0.448333	0.597726	0.673706	0.301199	0.327484	0.496488	0.73449	0.808519	0.624833	0.378616	0.522773	0.509425	0.619699	0.266529	0.57637	0.729151
cg00410419	0.0855627	0.0728577	0.0629396	0.0431853	0.0506444	0.0605625	0.0398246	0.079579	0.0706445	0.0547428	0.0629396	0.0571198	0.0431853	0.0595789	0.0374475	0.0372016	0.0258081	0.0662183	0.033759	0.0456443	0.0729396	0.0535132	0.0421197	0.0546608	0.0482673	0.0428574	0.036218	0.0522837	0.0453164	0.0347426	0.059169	0.0463001	0.0487591	0.0375295	0.0734314	0.0522837	0.038677	0.0685134	0.0653986	0.0505624	0.0674478	0.0598248	0.0244146	0.0607264	0.0634314	0.0408902	0.0495515	0.0449886	0.0458902
cg00410898	0.0479954	0.0785922	0.113574	0.0780203	0.0663916	0.0595288	0.108426	0.493793	0.152272	0.663934	0.0915553	0.089077	0.463387	0.0899349	0.060196	0.113288	0.0873613	0.0926038	0.089363	0.0916506	0.085455	0.0619117	0.106139	0.0806891	0.103279	0.0919366	0.0938429	0.107759	0.146744	0.0947008	0.458431	0.122438	0.0689651	0.0822142	0.0636274	0.0702043	0.0895536	0.221568	0.0984181	0.0552395	0.069823	0.194593	0.117577	0.123296	0.111477	0.279616	0.109507	0.122724	0.157705
cg00411097	0.146911	0.41319	0.198873	0.258464	0.251414	0.211911	0.262134	0.182067	0.23625	0.184675	0.216258	0.32897	0.107312	0.195879	0.134452	0.168352	0.216161	0.178397	0.157438	0.271503	0.247744	0.120834	0.134065	0.243397	0.144303	0.219058	0.143337	0.291979	0.114362	0.146911	0.162171	0.234898	0.364899	0.149615	0.192402	0.345196	0.230552	0.203219	0.274883	0.218479	0.113976	0.259527	0.160626	0.144786	0.239824	0.231324	0.142565	0.122958	0.227365
cg00412772	0.241625	0.496252	0.366054	0.431004	0.327959	0.275542	0.359191	0.248189	0.35929	0.278128	0.364761	0.537032	0.460445	0.204227	0.227998	0.261716	0.315228	0.223622	0.242122	0.403253	0.421057	0.228297	0.212184	0.35014	0.230385	0.365755	0.298518	0.541806	0.228794	0.193683	0.201939	0.354516	0.542005	0.309061	0.349046	0.50033	0.265894	0.303093	0.404248	0.366054	0.133806	0.516542	0.27037	0.180057	0.339199	0.400667	0.257539	0.282803	0.368043
cg00412805	0.91714	0.941079	0.919916	0.941513	0.955217	0.960855	0.944809	0.955217	0.932752	0.967446	0.954696	0.889732	0.957819	0.94689	0.949319	0.932579	0.959467	0.957125	0.863451	0.938824	0.906645	0.957038	0.952962	0.932579	0.951661	0.938043	0.935875	0.942293	0.961982	0.947758	0.956344	0.885916	0.935528	0.932405	0.942814	0.934314	0.94689	0.936309	0.958426	0.953222	0.95964	0.907166	0.939084	0.921737	0.943334	0.931018	0.928936	0.968227	0.9514
cg00415978	0.0411945	0.0511428	0.0461686	0.104694	0.0508253	0.0512486	0.0517778	0.0610911	0.0551645	0.115807	0.0480736	0.0676528	0.869658	0.0432053	0.0551645	0.0917828	0.0418295	0.055482	0.0333628	0.0543178	0.0536828	0.0657478	0.0604561	0.047862	0.0528361	0.0578103	0.119511	0.0433111	0.0517778	0.0411945	0.0589745	0.047862	0.0487086	0.0435228	0.058022	0.0495553	0.0463803	0.049767	0.049767	0.0513545	0.0354795	0.0528361	0.055482	0.0541061	0.0476503	0.121522	0.0917475	0.0456395	0.0597153
cg00415993	0.65581	0.597748	0.559796	0.605316	0.738416	0.658946	0.728901	0.825131	0.559148	0.869029	0.726955	0.555471	0.904169	0.864704	0.84135	0.790532	0.689328	0.839728	0.612128	0.693761	0.641862	0.810859	0.840809	0.658513	0.845026	0.719495	0.667379	0.729118	0.862109	0.833349	0.752905	0.672569	0.478488	0.560878	0.70652	0.68749	0.627157	0.571906	0.379771	0.633861	0.0334516	0.558715	0.822212	0.797884	0.372635	0.798965	0.735749	0.846107	0.771502
cg00417297	0.0209268	0.0283562	0.0216953	0.0259651	0.0216953	0.0263067	0.0218661	0.0210976	0.0327968	0.0278438	0.020329	0.0364688	0.0235741	0.0226347	0.0178525	0.0184503	0.0178525	0.0206706	0.0218661	0.0236594	0.0249404	0.0259651	0.0269045	0.0325406	0.0284416	0.0372374	0.020329	0.0309181	0.0238302	0.0185357	0.0245988	0.0214392	0.025709	0.0300641	0.0223785	0.0231471	0.0210976	0.0319428	0.0262213	0.020329	0.0296372	0.038006	0.0228909	0.0216099	0.0210122	0.019902	0.0255382	0.0242572	0.0377498
cg00418150	0.751559	0.571568	0.707217	0.72324	0.503642	0.711752	0.581242	0.723543	0.533272	0.670634	0.591018	0.490944	0.803763	0.782297	0.758211	0.509992	0.497495	0.823012	0.643826	0.467563	0.612484	0.776553	0.769196	0.651586	0.78915	0.676277	0.713566	0.449524	0.344713	0.54214	0.616011	0.584871	0.534179	0.670029	0.633043	0.584568	0.281021	0.508077	0.616314	0.719008	0.847804	0.513216	0.504146	0.713566	0.622764	0.597166	0.754616	0.752265	0.708426
cg00419564	0.0400752	0.02655	0.0315593	0.0353998	0.0193699	0.0235443	0.0293886	0.025882	0.0450845	0.0559381	0.0198708	0.0380715	0.0273848	0.0350658	0.0217076	0.0253811	0.0150285	0.018702	0.0200378	0.0347319	0.0627842	0.0247132	0.0197038	0.0439157	0.0484241	0.0387394	0.0202048	0.0454185	0.0166982	0.0155294	0.0158633	0.0320602	0.0158633	0.0208727	0.0238783	0.0212067	0.0308914	0.0477562	0.0390733	0.0151954	0.02655	0.0288876	0.0136926	0.0195369	0.0205387	0.0355668	0.0278301	0.00868329	0.0293886
cg00420568	0.0353105	0.0356069	0.0280482	0.0400532	0.0267143	0.0486494	0.046278	0.0281964	0.0482048	0.0446477	0.0437584	0.046278	0.0203413	0.0283446	0.030716	0.03783	0.0402014	0.028641	0.0304195	0.0382747	0.0465744	0.0240465	0.0279	0.0551706	0.0373854	0.043462	0.0203413	0.0456852	0.0188591	0.0393121	0.0338284	0.0305677	0.0510207	0.0450923	0.100078	0.0330873	0.0387193	0.0579866	0.0634704	0.0290856	0.0382747	0.0720666	0.0333837	0.0281964	0.0262697	0.0280482	0.0298761	0.0216751	0.0347176
cg00420715	0.0315659	0.0260109	0.0715619	0.021396	0.0313096	0.0256691	0.0227634	0.0271219	0.0408812	0.0274638	0.0290876	0.0307113	0.023618	0.0319078	0.0331897	0.0243872	0.0252418	0.0172084	0.0228489	0.0197723	0.0378046	0.0353262	0.0255836	0.0263528	0.0375482	0.0307968	0.0272074	0.0265237	0.0213106	0.0267801	0.0233616	0.0246436	0.0190886	0.0345571	0.0266092	0.0146446	0.0201141	0.0378046	0.0463508	0.0190031	0.0337879	0.0289166	0.0227634	0.0243872	0.0194304	0.0230198	0.0330188	0.0207123	0.0275493
cg00420929	0.434183	0.407253	0.417586	0.326776	0.38836	0.716529	0.505265	0.447752	0.375521	0.266445	0.302769	0.374164	0.144112	0.564448	0.425415	0.296506	0.241603	0.309762	0.14787	0.248596	0.425832	0.436896	0.423953	0.333456	0.47489	0.455058	0.434183	0.266445	0.44222	0.13858	0.188787	0.331264	0.40099	0.3178	0.413202	0.378653	0.245882	0.252876	0.459442	0.462261	0.0679153	0.332099	0.313311	0.348696	0.388882	0.276987	0.569563	0.291183	0.283459
cg00422913	0.0415705	0.0570278	0.0366109	0.0561186	0.0559533	0.0468607	0.0290063	0.0370242	0.0495885	0.0825697	0.0330566	0.0679389	0.0407439	0.0471914	0.0312381	0.0428931	0.031734	0.0333872	0.0357017	0.0644672	0.0481006	0.0393387	0.0459515	0.0367763	0.0405786	0.0471087	0.0369416	0.0700054	0.0196657	0.0364456	0.039752	0.0484313	0.0562013	0.0463648	0.0569452	0.0427277	0.0371069	0.0371896	0.0714106	0.0376855	0.0536388	0.0637233	0.0364456	0.0364456	0.051655	0.0612435	0.048817	0.027601	0.0497538
cg00424946	0.0252292	0.0464821	0.030219	0.0288329	0.01719	0.0185761	0.0237507	0.0394594	0.0288329	0.0226419	0.0187609	0.0418619	0.0250444	0.0406606	0.0147875	0.0230115	0.0295722	0.0202394	0.0190381	0.0252292	0.0288329	0.0217178	0.0223646	0.0239355	0.0185761	0.0264304	0.0203318	0.0325291	0.015804	0.0212558	0.0199621	0.0349316	0.0192229	0.0265228	0.0212558	0.0288329	0.030219	0.0241203	0.0466669	0.0222722	0.0328987	0.0184837	0.0237507	0.0272621	0.0225495	0.0179293	0.0280013	0.021533	0.0280937
cg00425710	0.8135	0.741424	0.827769	0.82829	0.744757	0.858704	0.757777	0.786836	0.52301	0.906511	0.63956	0.655809	0.893283	0.813917	0.671224	0.849955	0.704449	0.765589	0.809542	0.569672	0.639977	0.781212	0.743299	0.749861	0.903386	0.813813	0.779233	0.856204	0.802147	0.694138	0.899428	0.733821	0.776421	0.816729	0.923384	0.821312	0.611126	0.705699	0.831519	0.824853	0.877972	0.750798	0.51874	0.83756	0.792565	0.865578	0.678931	0.727676	0.785066
cg00425792	0.0767398	0.0575004	0.0743034	0.0816127	0.0439739	0.049771	0.0597688	0.0586766	0.0816967	0.0841332	0.0574163	0.0716989	0.0718669	0.0479226	0.0620372	0.0748915	0.0594327	0.0412014	0.060777	0.0568282	0.0937109	0.0683383	0.0528795	0.0853934	0.0633814	0.0580045	0.0651457	0.0750595	0.0615331	0.0369167	0.0358245	0.0588446	0.055736	0.0564082	0.0674141	0.0682543	0.0593487	0.0912744	0.0816127	0.0685063	0.0708588	0.0516193	0.0528795	0.0477546	0.0638855	0.0846372	0.0661259	0.077664	0.0727911
cg00426056	0.019063	0.0555372	0.0193886	0.073123	0.0155621	0.0272046	0.068808	0.0414523	0.0846841	0.0632717	0.0587125	0.0710876	0.0157249	0.0355904	0.0516293	0.0183302	0.0180046	0.021424	0.0226453	0.0497567	0.0793106	0.0289957	0.0531762	0.0674239	0.0656328	0.0613178	0.0256577	0.0701921	0.0621319	0.0675054	0.051385	0.0649	0.0622947	0.0174347	0.0199585	0.0541532	0.0434877	0.0913602	0.072716	0.0172718	0.0241108	0.0536647	0.021424	0.0165391	0.0653071	0.0612363	0.0322523	0.0202028	0.0555372
cg00426498	0.0605881	0.143078	0.127456	0.144372	0.0961117	0.0969077	0.326169	0.120192	0.183577	0.359902	0.114918	0.241291	0.128451	0.0984003	0.124471	0.093624	0.0999924	0.112033	0.0961117	0.139795	0.178801	0.209449	0.107057	0.116908	0.0790962	0.10656	0.107754	0.208752	0.0870566	0.0806883	0.0708372	0.111436	0.179199	0.102082	0.14686	0.142183	0.105167	0.0974052	0.136511	0.113923	0.102281	0.143874	0.140193	0.18915	0.119496	0.150442	0.103276	0.0771061	0.118998
cg00426963	0.045002	0.0195585	0.0179991	0.0270274	0.0160293	0.0189019	0.0199689	0.0303105	0.042786	0.0253859	0.0225133	0.0247293	0.0224312	0.0430322	0.0246472	0.0196406	0.0204614	0.0239085	0.0214463	0.0201331	0.0349888	0.0202972	0.0221029	0.0280944	0.0238265	0.0340859	0.0183274	0.0259604	0.0216104	0.0185736	0.0189019	0.0505011	0.0193123	0.0273557	0.0244831	0.0212	0.0202972	0.0335114	0.0220208	0.0170142	0.0268633	0.0212	0.0326086	0.0185736	0.0246472	0.0244831	0.0254406	0.0172604	0.0283406
cg00427635	0.0462789	0.225959	0.0834256	0.14497	0.176705	0.0949824	0.176889	0.17588	0.113051	0.0881034	0.198076	0.372069	0.0981009	0.18441	0.0771886	0.0778307	0.115619	0.0872779	0.0773721	0.163039	0.12149	0.190463	0.0631554	0.160838	0.112318	0.0936066	0.136715	0.191839	0.0343553	0.0957161	0.61898	0.118188	0.328777	0.0793899	0.156343	0.251916	0.130937	0.123599	0.247421	0.365557	0.0393082	0.225959	0.0791148	0.0906715	0.186519	0.146621	0.0600675	0.0732447	0.169734
cg00430287	0.321429	0.593389	0.391665	0.451619	0.320131	0.538088	0.495232	0.416447	0.405517	0.385496	0.46255	0.785481	0.558001	0.172625	0.423157	0.642305	0.270782	0.219269	0.275111	0.5422	0.791109	0.2289	0.372185	0.391881	0.202711	0.387336	0.337662	0.605726	0.211801	0.124467	0.319481	0.591549	0.700095	0.243943	0.744357	0.575424	0.226952	0.231281	0.498262	0.361255	0.220567	0.676286	0.228576	0.231065	0.330736	0.499669	0.138896	0.316776	0.336472
cg00431050	0.498593	0.332745	0.269978	0.349046	0.251724	0.365446	0.461694	0.272906	0.362517	0.224294	0.349632	0.54457	0.584982	0.224099	0.228882	0.396097	0.186517	0.402051	0.266366	0.359589	0.449492	0.293308	0.296237	0.274566	0.284718	0.329133	0.395316	0.360272	0.174022	0.148252	0.24167	0.34192	0.409177	0.274664	0.629104	0.486879	0.175682	0.352658	0.366031	0.414741	0.340359	0.407713	0.284035	0.338309	0.306389	0.371107	0.17041	0.185931	0.268611
cg00431549	0.596553	0.613221	0.396227	0.643797	0.633878	0.771621	0.738285	0.810786	0.790335	0.834204	0.759657	0.417497	0.286809	0.70096	0.614142	0.65934	0.0909823	0.85803	0.724786	0.706584	0.663533	0.757714	0.801788	0.620379	0.81457	0.711697	0.229237	0.693802	0.916011	0.862632	0.511575	0.603404	0.303784	0.445004	0.578555	0.543685	0.65075	0.75209	0.723661	0.739512	0.90916	0.342438	0.329145	0.794016	0.750965	0.644206	0.274743	0.691552	0.780109
cg00432979	0.0171198	0.0185868	0.0210317	0.0180978	0.0136969	0.017022	0.0149682	0.0147727	0.0229876	0.0167286	0.0156528	0.0190757	0.0149682	0.0136969	0.0159462	0.016533	0.0173154	0.0146749	0.0174132	0.0194669	0.0207383	0.0169242	0.0163374	0.0214229	0.0194669	0.0224987	0.016044	0.0169242	0.0144793	0.0157506	0.0163374	0.0126211	0.0135991	0.0152616	0.0171198	0.0179022	0.015066	0.0191735	0.016044	0.0197603	0.0182934	0.0179022	0.0139903	0.0249436	0.0140881	0.0166308	0.0180652	0.0159462	0.0193691
cg00433406	0.703859	0.83761	0.866737	0.928401	0.882421	0.919049	0.897033	0.892455	0.846962	0.952755	0.879499	0.758022	0.948566	0.957723	0.923141	0.905995	0.831376	0.933077	0.851151	0.868198	0.690319	0.906288	0.804002	0.784227	0.922946	0.92616	0.679895	0.773414	0.955093	0.944377	0.633623	0.868491	0.804879	0.839753	0.884175	0.842871	0.680382	0.831376	0.871218	0.862646	0.776823	0.845598	0.833714	0.846962	0.856216	0.794163	0.861996	0.902001	0.868198
cg00434413	0.907115	0.976425	0.951248	0.961357	0.757219	0.928598	0.965829	0.964954	0.921307	0.953386	0.949206	0.952122	0.871051	0.975452	0.887382	0.968939	0.762274	0.944637	0.848401	0.973703	0.929084	0.918877	0.915669	0.841499	0.785799	0.805726	0.962329	0.91878	0.958733	0.906726	0.942499	0.892922	0.954844	0.934139	0.936666	0.961746	0.466469	0.614712	0.915475	0.894478	0.917711	0.970884	0.805921	0.953192	0.82964	0.928987	0.943827	0.934528	0.896519
cg00435408	0.037333	0.0308957	0.0306423	0.0304733	0.0239684	0.0336835	0.0321629	0.0255735	0.0394281	0.033937	0.0264183	0.0360489	0.0325008	0.0449193	0.0286992	0.0303888	0.0261649	0.0265028	0.0344438	0.0307267	0.0290372	0.0282768	0.0270097	0.0437365	0.0309802	0.0367248	0.0325853	0.0340214	0.0273476	0.0224478	0.0296285	0.0348662	0.0259114	0.0314026	0.0360489	0.0308957	0.0248132	0.0372316	0.0314026	0.033599	0.0300509	0.0322474	0.0233771	0.0346128	0.033768	0.0287837	0.0340496	0.0344438	0.0352041
cg00436282	0.125359	0.770893	0.383655	0.688904	0.640512	0.437903	0.910828	0.893568	0.896753	0.87004	0.917096	0.839114	0.668869	0.91802	0.385402	0.390744	0.626025	0.207965	0.787126	0.861306	0.763392	0.216081	0.328893	0.356223	0.600442	0.627361	0.348106	0.560373	0.922336	0.604552	0.212383	0.76555	0.865622	0.634039	0.638354	0.877643	0.715309	0.592942	0.798222	0.438622	0.697945	0.914835	0.83521	0.8236	0.454753	0.657259	0.239541	0.513316	0.866649
cg00436301	0.0199733	0.0349851	0.027138	0.0571617	0.0217645	0.0284174	0.0241527	0.030038	0.0435146	0.0358381	0.0298674	0.0343881	0.0282469	0.027138	0.0252615	0.0299527	0.0345586	0.0292704	0.0316586	0.0369469	0.0303792	0.0328528	0.0257733	0.0301233	0.0298674	0.0345586	0.0195468	0.025688	0.0295263	0.0287586	0.0302086	0.0360086	0.0279057	0.0370322	0.043941	0.0273086	0.028588	0.0360939	0.0376292	0.0320851	0.035241	0.0370322	0.025688	0.0312322	0.0232998	0.0259439	0.0340469	0.022788	0.036691
cg00436603	0.346915	0.618577	0.342943	0.485098	0.395833	0.398551	0.516664	0.726447	0.474332	0.475272	0.483007	0.627148	0.798046	0.25441	0.235909	0.803377	0.288068	0.470464	0.330923	0.656519	0.394474	0.29413	0.630701	0.385276	0.465342	0.387262	0.412557	0.63436	0.64314	0.3535	0.411198	0.499	0.54405	0.464402	0.497745	0.66739	0.31608	0.441824	0.434089	0.465238	0.17079	0.511229	0.30406	0.564119	0.476945	0.512483	0.227582	0.7069	0.387053
cg00441382	0.0374684	0.0324412	0.0209132	0.0302743	0.0288008	0.0204798	0.0246403	0.0392886	0.0227334	0.0257671	0.0253337	0.0245536	0.0256804	0.0238602	0.0175328	0.0214333	0.0205665	0.0212599	0.0261138	0.0270672	0.0309677	0.024727	0.0250737	0.0229068	0.0227334	0.0254204	0.0201331	0.0342614	0.0227334	0.0143258	0.0230801	0.0245536	0.018573	0.0288008	0.028194	0.0292341	0.0234268	0.0262005	0.0359082	0.0214333	0.0216066	0.0265472	0.0268939	0.0249003	0.0242936	0.0288874	0.0298698	0.0178796	0.0159727
cg00443307	0.221144	0.397002	0.411258	0.275502	0.253887	0.137354	0.499647	0.783762	0.42901	0.666584	0.457338	0.712204	0.682496	0.217189	0.137446	0.211119	0.565594	0.170649	0.29169	0.59797	0.334918	0.122086	0.133491	0.278997	0.726552	0.207991	0.201369	0.441427	0.728024	0.21351	0.0967923	0.401914	0.680472	0.219029	0.532207	0.457982	0.370881	0.665296	0.401049	0.814849	0.612778	0.392587	0.209555	0.188125	0.287367	0.502775	0.224547	0.73529	0.363431
cg00445824	0.0514282	0.0442778	0.192648	0.494552	0.0412985	0.0544075	0.0428875	0.0608627	0.0972104	0.566552	0.0587772	0.0454696	0.781262	0.0632462	0.0569896	0.0714889	0.0482503	0.0695027	0.0491441	0.227506	0.168515	0.0499385	0.182022	0.124819	0.0781428	0.187881	0.214993	0.0602668	0.0442778	0.0611606	0.28163	0.0418944	0.0777455	0.0846973	0.838862	0.196322	0.0471579	0.113199	0.0600682	0.0898614	0.0518254	0.12035	0.0611606	0.0640407	0.0480516	0.496141	0.0825786	0.0502365	0.141404
cg00446235	0.111559	0.166373	0.143833	0.0803958	0.065369	0.048976	0.0511959	0.0622953	0.0449632	0.0409503	0.0382182	0.103107	0.0455608	0.072114	0.0364252	0.0444509	0.0817619	0.0789444	0.0382182	0.0679304	0.0386451	0.0452193	0.0296802	0.0727116	0.0645152	0.0464146	0.0472684	0.0587947	0.034803	0.0314732	0.0406088	0.063576	0.0942274	0.0389012	0.0655397	0.0944835	0.0656251	0.0605877	0.0748461	0.0885069	0.0347176	0.102168	0.0495737	0.0427433	0.0798835	0.0406942	0.0622099	0.029424	0.0658812
cg00447208	0.393999	0.530726	0.445088	0.598565	0.657087	0.638034	0.566949	0.770468	0.629972	0.76963	0.605684	0.417241	0.78502	0.850137	0.50204	0.615316	0.590295	0.756648	0.635521	0.548942	0.564017	0.614583	0.704512	0.685354	0.697289	0.599717	0.550721	0.699068	0.645048	0.786485	0.733931	0.584746	0.514917	0.617724	0.658972	0.478171	0.504029	0.676665	0.456395	0.611547	0.772143	0.428861	0.640965	0.628402	0.730895	0.562028	0.682178	0.647142	0.620236
cg00448720	0.414557	0.532512	0.32634	0.363962	0.298698	0.427929	0.410466	0.541194	0.438108	0.482715	0.397692	0.602566	0.727207	0.622325	0.400486	0.473734	0.304785	0.530716	0.42274	0.741877	0.514549	0.420445	0.288519	0.327139	0.314565	0.48521	0.526624	0.343205	0.894859	0.438308	0.426432	0.347197	0.563348	0.300095	0.661444	0.589494	0.261076	0.203795	0.464753	0.402083	0.421143	0.509061	0.164577	0.2015	0.42743	0.508362	0.414491	0.359172	0.507564
cg00449941	0.0237737	0.0395068	0.0251378	0.0463275	0.0244103	0.0317767	0.0207726	0.0380517	0.0375061	0.0460547	0.0279571	0.0377789	0.0366876	0.0337774	0.0262291	0.0350506	0.0318676	0.0194084	0.0263201	0.0432355	0.0384155	0.0274114	0.0304125	0.0357781	0.0445996	0.0422351	0.0196812	0.0442358	0.0317767	0.0235008	0.0273204	0.032868	0.0235918	0.0329589	0.0314129	0.0224095	0.0302306	0.0435083	0.0411438	0.0299578	0.0279571	0.0310491	0.0183171	0.0262291	0.0249559	0.0298669	0.0361419	0.0254106	0.0302306
cg00451635	0.209529	0.321392	0.255335	0.3006	0.244073	0.264648	0.293995	0.284682	0.234869	0.233677	0.259992	0.449065	0.177042	0.155276	0.247972	0.265839	0.169137	0.184622	0.175743	0.299084	0.315111	0.210503	0.229671	0.205197	0.201407	0.2601	0.250246	0.271579	0.199241	0.101564	0.189712	0.383983	0.307639	0.20184	0.284573	0.357019	0.151594	0.207255	0.321284	0.266164	0.16892	0.353229	0.153543	0.201949	0.216351	0.296485	0.144483	0.19361	0.233894
cg00453193	0.0291347	0.0216243	0.0448901	0.0386859	0.0243183	0.0370532	0.0273387	0.0284816	0.0355838	0.0267673	0.0296245	0.0300326	0.0404818	0.0437472	0.019012	0.0221958	0.034196	0.0234203	0.0224407	0.0426859	0.0270122	0.0197467	0.0228488	0.0328082	0.0330531	0.0272571	0.0298694	0.0236652	0.0368899	0.0279918	0.031747	0.0207263	0.0191753	0.0319102	0.0214611	0.0225223	0.0255428	0.0296245	0.0301143	0.0242366	0.0302775	0.0372981	0.0303592	0.0406451	0.0297061	0.0300326	0.0368899	0.0319919	0.0243183
cg00453258	0.814906	0.70154	0.612762	0.650394	0.699851	0.689622	0.774083	0.784687	0.677703	0.787878	0.759068	0.732978	0.792946	0.767138	0.730914	0.441963	0.716556	0.79257	0.656588	0.701259	0.660905	0.740768	0.657714	0.683428	0.435769	0.668694	0.546038	0.721811	0.817158	0.786283	0.707452	0.70642	0.741988	0.709705	0.718339	0.725846	0.617924	0.656964	0.709329	0.743395	0.80721	0.655274	0.670383	0.714303	0.744991	0.625995	0.412652	0.742832	0.741143
cg00459975	0.0651381	0.078013	0.0397184	0.0903377	0.0492921	0.0668988	0.0448904	0.269926	0.0629373	0.0467611	0.0582055	0.0993611	0.0796636	0.0751519	0.0501724	0.0565548	0.0378477	0.0416992	0.0501724	0.126101	0.189375	0.0576552	0.0474213	0.0889072	0.0522632	0.0561147	0.0497322	0.0698699	0.0479715	0.04379	0.0396084	0.0392782	0.0773528	0.0572151	0.335951	0.0631573	0.0313552	0.0552343	0.0961699	0.046541	0.0788933	0.0905578	0.0358669	0.0528134	0.0433498	0.0612866	0.049182	0.0350966	0.0589757
cg00461841	0.632434	0.784444	0.831039	0.815106	0.85679	0.787779	0.691997	0.798154	0.683197	0.808807	0.778609	0.764343	0.808992	0.856976	0.85818	0.668191	0.702742	0.755728	0.674119	0.760267	0.734886	0.796579	0.738313	0.699315	0.750634	0.744983	0.739425	0.680974	0.8617	0.408449	0.52235	0.587982	0.520905	0.734145	0.77972	0.782962	0.820756	0.682549	0.782777	0.7762	0.815754	0.809455	0.713858	0.756284	0.750448	0.694869	0.708794	0.754061	0.687829
cg00462311	0.053088	0.0477882	0.0397281	0.0531984	0.0428197	0.053088	0.0591607	0.0571733	0.0525359	0.0579461	0.0458008	0.0529776	0.0295702	0.0642396	0.0509902	0.0717477	0.116796	0.0459112	0.0822368	0.0548546	0.0528672	0.0384032	0.076385	0.0550754	0.0535297	0.0578357	0.0808015	0.0434822	0.0577253	0.0379615	0.0579461	0.0912906	0.0473466	0.106417	0.044255	0.0396177	0.062473	0.0499965	0.0504381	0.0601544	0.0428197	0.0580566	0.0929468	0.0900761	0.0607064	0.0599336	0.0426725	0.0242704	0.0836722
cg00462994	0.0192191	0.114783	0.0904788	0.102631	0.0484781	0.177194	0.166458	0.105698	0.0976756	0.0959059	0.07231	0.160559	0.64982	0.0342026	0.0494219	0.0618098	0.0308991	0.0674728	0.0513096	0.178846	0.114665	0.0352644	0.346495	0.0635795	0.0557928	0.0917766	0.0641694	0.187458	0.0556748	0.0344385	0.127996	0.0849338	0.13189	0.077619	0.179317	0.129766	0.0700684	0.122451	0.157609	0.066529	0.115373	0.148643	0.0416353	0.066411	0.049186	0.182621	0.0362869	0.0245282	0.089299
cg00463202	0.646614	0.803223	0.883662	0.834861	0.850076	0.793853	0.860003	0.88626	0.875312	0.869374	0.846829	0.57703	0.901754	0.883662	0.702837	0.891362	0.764071	0.892383	0.807862	0.741155	0.809903	0.867797	0.813151	0.849798	0.899063	0.839407	0.869281	0.75303	0.949534	0.894424	0.877075	0.870395	0.646057	0.823356	0.804801	0.774926	0.832912	0.778266	0.862694	0.816212	0.933948	0.831057	0.857684	0.854344	0.827253	0.856571	0.888115	0.813336	0.839871
cg00463577	0.35411	0.271619	0.311838	0.0225224	0.0165761	0.026847	0.44763	0.52677	0.331514	0.0393883	0.212372	0.0885805	0.816842	0.239401	0.0351718	0.398437	0.0236036	0.0141976	0.0345232	0.0379828	0.412601	0.00468347	0.166207	0.0293336	0.19356	0.0246847	0.0193871	0.0291174	0.0301986	0.0405776	0.0169004	0.265564	0.0436048	0.0251172	0.0232792	0.0397127	0.0343069	0.414871	0.605477	0.613586	0.608288	0.274322	0.145773	0.0393883	0.0542	0.341785	0.0153508	0.196263	0.0273876
cg00463848	0.907318	0.794234	0.699155	0.539355	0.89661	0.849541	0.932029	0.884019	0.596074	0.918379	0.911084	0.814357	0.836244	0.838362	0.839068	0.586424	0.692212	0.943797	0.457102	0.919909	0.420388	0.396501	0.400384	0.602193	0.952034	0.5037	0.639377	0.439687	0.738105	0.7181	0.474047	0.914261	0.906377	0.676444	0.669384	0.878606	0.219521	0.852482	0.837773	0.649262	0.685387	0.674561	0.833773	0.729514	0.881312	0.722101	0.0809023	0.604075	0.561007
cg00464269	0.0631174	0.0377736	0.028899	0.036323	0.0230111	0.0295817	0.0248031	0.032483	0.0364936	0.0399923	0.0277897	0.0321417	0.0286431	0.0420403	0.0283017	0.031203	0.032995	0.0273631	0.0190858	0.0331657	0.0284724	0.034531	0.0279604	0.0316297	0.0274484	0.0329097	0.0253151	0.038627	0.0208778	0.0242911	0.0248031	0.0276191	0.0209631	0.0260831	0.0280457	0.0258271	0.0260831	0.0361523	0.0305204	0.0262537	0.0326537	0.0292404	0.029667	0.0253151	0.0280457	0.0254004	0.0295533	0.0226698	0.0298377
cg00465284	0.0941696	0.081762	0.382797	0.27667	0.0399617	0.633358	0.225835	0.0906762	0.206922	0.126092	0.0503214	0.111034	0.707201	0.0465871	0.0286382	0.0385161	0.0222537	0.37328	0.264744	0.134284	0.191021	0.149944	0.633117	0.0601993	0.400143	0.450497	0.497838	0.0654996	0.0235788	0.0576696	0.7955	0.0139419	0.19584	0.457724	0.515787	0.0832076	0.0367092	0.0470689	0.390868	0.0445392	0.0279155	0.11778	0.0223742	0.208247	0.0317702	0.165001	0.0747351	0.0200854	0.053333
cg00466249	0.170089	0.437783	0.217273	0.309548	0.277585	0.246573	0.371573	0.25894	0.205857	0.157341	0.261889	0.427604	0.181124	0.135747	0.168376	0.201481	0.27416	0.204906	0.170564	0.360442	0.347219	0.292615	0.144689	0.192159	0.14545	0.253232	0.183692	0.388506	0.10816	0.135937	0.161051	0.337516	0.504944	0.185595	0.286432	0.398114	0.240199	0.212897	0.390598	0.218414	0.127185	0.400397	0.178746	0.220412	0.237345	0.278536	0.143992	0.173323	0.273019
cg00466544	0.0302778	0.0315328	0.061234	0.0363854	0.0247558	0.0182299	0.0393137	0.0278515	0.0347957	0.035967	0.0297758	0.0356324	0.0275168	0.0274331	0.0235009	0.0267638	0.0497718	0.0303614	0.0251742	0.035214	0.038979	0.0296921	0.0254252	0.0311981	0.0253415	0.034712	0.0290228	0.0340427	0.0259272	0.0251742	0.0227479	0.0328714	0.0240865	0.0343774	0.0260108	0.0278515	0.0318674	0.0328714	0.038477	0.0411543	0.0274331	0.0265965	0.0406523	0.038477	0.0244212	0.0281025	0.0348236	0.0260108	0.0479312
cg00468146	0.0699717	0.190047	0.172908	0.670866	0.101772	0.617281	0.133262	0.14751	0.235786	0.141109	0.185608	0.287409	0.688005	0.0488062	0.162068	0.125209	0.167436	0.122421	0.136256	0.36505	0.276258	0.10714	0.233411	0.153601	0.0909308	0.677474	0.121801	0.355551	0.152053	0.138837	0.750366	0.165371	0.334386	0.136256	0.505362	0.385183	0.112716	0.352247	0.425552	0.166404	0.0761665	0.362056	0.160725	0.0758568	0.115194	0.474801	0.170706	0.113438	0.183646
cg00469635	0.046592	0.0105031	0.0110597	0.0112453	0.0096681	0.0105958	0.0108742	0.0143996	0.0158839	0.0116163	0.0103175	0.0096681	0.0103175	0.0197804	0.0112453	0.00985365	0.00938978	0.0115236	0.0108742	0.00976087	0.0145851	0.00976087	0.00938978	0.0139357	0.0119874	0.0147706	0.0103175	0.00976087	0.00883314	0.012173	0.0115236	0.0115236	0.0105958	0.0110597	0.0119874	0.0110597	0.00957533	0.0139357	0.00948255	0.0104103	0.0134718	0.0100392	0.00938978	0.013379	0.0100392	0.0106886	0.01341	0.0112453	0.0120802
cg00471562	0.0661425	0.0332858	0.0268381	0.0498908	0.0301061	0.0410583	0.0394685	0.0465345	0.0331975	0.0501558	0.0478593	0.0373487	0.0334624	0.0362888	0.0488309	0.0432665	0.0372604	0.0356705	0.0381436	0.0260432	0.0331091	0.0411467	0.0384086	0.0419416	0.0415	0.0481243	0.0406167	0.0315193	0.0277213	0.0448563	0.0336391	0.0637578	0.0437964	0.0396451	0.0443264	0.0401751	0.0425599	0.0308127	0.0483893	0.0488309	0.0332858	0.0317843	0.0490076	0.0359355	0.0427365	0.0444147	0.0641994	0.0547487	0.0389386
cg00472814	0.0812955	0.505994	0.675215	0.617985	0.734196	0.655349	0.546138	0.053092	0.434456	0.78103	0.584944	0.444647	0.829717	0.0575181	0.817777	0.204506	0.0518568	0.799763	0.639086	0.511244	0.374962	0.807586	0.641042	0.43703	0.600383	0.696831	0.623852	0.0551506	0.490555	0.0670908	0.552108	0.718962	0.314952	0.680259	0.636101	0.420046	0.0661644	0.0854127	0.594105	0.0464014	0.582988	0.498069	0.682215	0.505377	0.0578269	0.608206	0.118591	0.107337	0.701463
cg00474004	0.159402	0.868104	0.69207	0.414747	0.334693	0.610317	0.678692	0.885729	0.505206	0.921933	0.901654	0.876279	0.628579	0.642593	0.607344	0.890825	0.877872	0.646309	0.369624	0.904627	0.658307	0.168214	0.549586	0.546401	0.167365	0.322801	0.470594	0.203463	0.892311	0.765966	0.275873	0.715428	0.901867	0.453606	0.746005	0.802702	0.59163	0.364103	0.598001	0.504781	0.681134	0.89263	0.334905	0.876916	0.583986	0.857062	0.837632	0.719781	0.367182
cg00474209	0.0554848	0.0545237	0.15384	0.0673387	0.0568731	0.767679	0.0392525	0.0526014	0.0454464	0.0826099	0.073319	0.0642417	0.055378	0.0578342	0.037971	0.0383981	0.0412815	0.0508928	0.0386117	0.050252	0.0477958	0.0341265	0.0487569	0.0479026	0.0539897	0.0453396	0.271952	0.0530286	0.0561255	0.0564459	0.0417087	0.039466	0.0449124	0.0326314	0.466633	0.0376506	0.0682998	0.0406408	0.0709696	0.0284665	0.055378	0.0498248	0.0360487	0.0387185	0.0347672	0.0347672	0.0510351	0.0537761	0.0377574
cg00475955	0.0251474	0.013533	0.0139664	0.0143998	0.0128396	0.0187335	0.0156999	0.0160466	0.0222871	0.0178667	0.0154399	0.0130996	0.0144864	0.0150932	0.0176067	0.0161332	0.013533	0.0128396	0.0177801	0.0151798	0.0185601	0.013273	0.0173467	0.0203803	0.0185601	0.0185601	0.0150065	0.020987	0.0120595	0.00989268	0.0151798	0.0113661	0.0121462	0.0215071	0.0209004	0.013273	0.0160466	0.0178667	0.0214204	0.0169133	0.0187335	0.0169133	0.01674	0.0183001	0.0139664	0.0134463	0.0184157	0.0146598	0.0180401
cg00476580	0.05143	0.0174593	0.076136	0.0162879	0.0781593	0.0282149	0.0308772	0.0381186	0.0519625	0.00925945	0.0333265	0.0560091	0.0256591	0.063144	0.00979191	0.00947243	0.0339654	0.0784788	0.0286409	0.0111763	0.0301317	0.0352433	0.0383316	0.0347109	0.04536	0.088276	0.0102179	0.0178852	0.0998835	0.0438691	0.0315161	0.0438691	0.00893998	0.0420588	0.00308295	0.0322616	0.0351368	0.0595233	0.0838034	0.0191631	0.0341784	0.0237423	0.0086205	0.0535598	0.0133061	0.00404138	0.0364502	0.0687881	0.088702
cg00479269	0.0500495	0.0347347	0.0258011	0.0455827	0.0351905	0.0282624	0.0288094	0.0347347	0.0363756	0.034917	0.0319999	0.0446711	0.0411159	0.0313618	0.0280801	0.0359198	0.0385634	0.0229751	0.0442153	0.0330939	0.0381076	0.0307237	0.0310883	0.0365579	0.035464	0.0355552	0.0345524	0.0395662	0.0268038	0.0261657	0.0281712	0.0426656	0.026895	0.0375607	0.0261657	0.0344612	0.0325469	0.0365579	0.0378341	0.0283536	0.028627	0.0382899	0.0313618	0.0456739	0.0306325	0.0293563	0.0482871	0.0317265	0.0386546
cg00480115	0.251512	0.54019	0.316688	0.414785	0.314024	0.326107	0.402796	0.184813	0.371969	0.175298	0.333053	0.68253	0.251607	0.144566	0.132958	0.30841	0.274157	0.210788	0.21193	0.460551	0.456745	0.171588	0.114309	0.320589	0.203652	0.358362	0.330104	0.447611	0.225536	0.21488	0.138571	0.407649	0.657507	0.239333	0.516117	0.563786	0.26312	0.283957	0.431341	0.319447	0.0914733	0.615927	0.197848	0.128866	0.304509	0.408886	0.178597	0.292615	0.324966
cg00480209	0.0239964	0.0388224	0.0262203	0.0355277	0.0319859	0.0258908	0.0529894	0.0384929	0.0392342	0.0420347	0.0208664	0.0425289	0.0536484	0.0376692	0.0277029	0.0280323	0.0212783	0.0316565	0.0349511	0.0404697	0.0368456	0.0459059	0.0315741	0.0341275	0.0341275	0.0370927	0.0327272	0.0391518	0.0354453	0.0281971	0.0337156	0.0355277	0.0368456	0.0346217	0.0376692	0.0403873	0.0316565	0.0737458	0.0399755	0.0201251	0.0414581	0.0326449	0.0231727	0.0293502	0.0277029	0.0340451	0.0408815	0.02482	0.0340451
cg00480356	0.108688	0.0507795	0.133116	0.0747117	0.0557396	0.0387514	0.0491675	0.0528875	0.0766957	0.0433395	0.0727277	0.0386274	0.0468115	0.0816557	0.0511515	0.0527635	0.0474315	0.0549956	0.0543755	0.0438355	0.0995118	0.0526395	0.0402395	0.132744	0.0748357	0.12766	0.0535075	0.0647916	0.0571036	0.0854998	0.0453235	0.0523915	0.0630556	0.0584676	0.0714877	0.0478035	0.0447035	0.107944	0.0511515	0.0926918	0.0574756	0.0412315	0.0486715	0.0625596	0.0413555	0.0419755	0.0904185	0.0771917	0.214957
cg00483154	0.013637	0.0332462	0.038426	0.0244591	0.0177068	0.0171519	0.0286214	0.0313038	0.0330612	0.0417559	0.0225166	0.0241816	0.0300088	0.0222392	0.025384	0.0222392	0.0237191	0.0214067	0.025384	0.0296389	0.0350036	0.0278814	0.0172444	0.0289914	0.0280664	0.0269565	0.0298238	0.0245516	0.0120646	0.0325987	0.0243666	0.0225166	0.0171519	0.0271415	0.0351886	0.0319513	0.0217767	0.0344487	0.037501	0.0256615	0.0226091	0.0309338	0.0191868	0.0354661	0.0184468	0.0298238	0.033277	0.0157644	0.0301938
cg00485296	0.0199997	0.0233476	0.0381031	0.0307873	0.0261995	0.0219836	0.0265715	0.0285554	0.0291754	0.0321513	0.0149159	0.0254555	0.0257035	0.0233476	0.0178918	0.0218596	0.0201237	0.0341352	0.0259515	0.0249595	0.0214876	0.0214876	0.0233476	0.0296714	0.0345072	0.0242156	0.0260755	0.0315313	0.0178918	0.0218596	0.0271915	0.0157838	0.0202477	0.0254555	0.0304154	0.0234716	0.0294234	0.0285554	0.0573225	0.0224796	0.0275634	0.0378551	0.0186357	0.0266955	0.0216116	0.0209917	0.0264475	0.0201237	0.0254555
cg00485380	0.0232087	0.0338018	0.0242175	0.0320363	0.0296823	0.0263194	0.0253946	0.0222839	0.0203502	0.0274123	0.0227042	0.0302708	0.0243857	0.0334656	0.0186687	0.0299345	0.0206024	0.0278327	0.0214431	0.0302708	0.0195095	0.0381736	0.018921	0.0279167	0.0301026	0.0229565	0.0220316	0.027076	0.0210228	0.0203502	0.0331293	0.0227883	0.0294301	0.0159784	0.024722	0.0233768	0.028253	0.0264034	0.0269079	0.0234609	0.0369966	0.0353992	0.0240494	0.0230405	0.0217794	0.0182484	0.0289256	0.0184165	0.0195935
cg00487159	0.0134696	0.0419584	0.0519964	0.0493196	0.0364136	0.0385168	0.0460692	0.0532392	0.0489372	0.051136	0.0384212	0.0422452	0.0562984	0.0404288	0.0373696	0.034406	0.0317292	0.0518052	0.0381344	0.0485548	0.0364136	0.0419584	0.0416716	0.0422452	0.0527612	0.0294348	0.0413848	0.044922	0.0328764	0.04062	0.0376564	0.0386124	0.0410024	0.0464516	0.0591664	0.03584	0.0472164	0.0383256	0.066432	0.0194924	0.0409068	0.057828	0.0293392	0.0252284	0.0436792	0.0476944	0.0616839	0.0354576	0.050658
cg00488364	0.900002	0.907059	0.745688	0.61929	0.934248	0.343559	0.607252	0.91588	0.702829	0.930097	0.911729	0.906644	0.894917	0.925738	0.662564	0.894191	0.863577	0.918267	0.705112	0.896162	0.831407	0.934248	0.854652	0.913908	0.543326	0.696706	0.318964	0.767585	0.936635	0.851435	0.126149	0.785849	0.738735	0.763434	0.84936	0.603723	0.726593	0.873228	0.442145	0.843963	0.922106	0.840643	0.761669	0.873228	0.741952	0.646064	0.466083	0.906644	0.902908
cg00488718	0.110221	0.034181	0.026602	0.0385951	0.0340144	0.0276847	0.0334314	0.028934	0.0375124	0.0349306	0.0321821	0.0296003	0.0273516	0.0476733	0.0229374	0.0299334	0.0357634	0.0271017	0.0340977	0.0319323	0.0238536	0.0301833	0.0226043	0.0286841	0.0326819	0.0301	0.0263521	0.0251029	0.0231873	0.0174406	0.0278513	0.0329317	0.0292671	0.0332649	0.0358467	0.0310161	0.0298501	0.0311827	0.045258	0.0244366	0.0374291	0.0270184	0.031266	0.0223544	0.0221046	0.0251029	0.0307663	0.023687	0.0290173
cg00489401	0.794843	0.590801	0.729408	0.7968	0.804816	0.7968	0.67376	0.850956	0.620536	0.829797	0.762218	0.541399	0.892529	0.659778	0.789529	0.782072	0.807519	0.859718	0.73817	0.617273	0.5606	0.861769	0.861303	0.770701	0.822061	0.740966	0.716731	0.704613	0.782632	0.872768	0.832127	0.81451	0.477269	0.744601	0.775734	0.666023	0.790928	0.743669	0.708901	0.696597	0.93028	0.599936	0.778064	0.520799	0.734348	0.664439	0.853908	0.816468	0.735094
cg00491404	0.368066	0.505951	0.336845	0.383726	0.37693	0.351422	0.403227	0.212059	0.322564	0.254114	0.402636	0.619509	0.220234	0.291836	0.263668	0.297253	0.340588	0.285434	0.243084	0.472071	0.392689	0.205658	0.201718	0.34827	0.280115	0.352308	0.306511	0.447055	0.228212	0.19768	0.229197	0.469805	0.62335	0.27332	0.475518	0.490094	0.287404	0.260024	0.389734	0.394954	0.174141	0.581	0.338421	0.230772	0.418591	0.358808	0.22181	0.351914	0.321579
cg00491839	0.0702467	0.0649162	0.0803467	0.0881087	0.0597726	0.0703402	0.0680023	0.0647291	0.0962448	0.0780087	0.0587439	0.0729587	0.0463995	0.0718365	0.0784763	0.0596791	0.0520106	0.0829652	0.0568736	0.0653837	0.0810948	0.0864254	0.0583699	0.0768865	0.0863319	0.112798	0.0746421	0.0955902	0.0594921	0.0377958	0.0757643	0.069405	0.0567801	0.0555643	0.0854902	0.0417236	0.0802532	0.0737069	0.106532	0.056593	0.0603338	0.0601467	0.0636069	0.0679087	0.0535069	0.0481764	0.071556	0.0442486	0.0683763
cg00493400	0.0397011	0.0315803	0.0191453	0.0324262	0.0268431	0.0259126	0.0263356	0.0248975	0.030819	0.030396	0.0287042	0.0309035	0.0254051	0.0353869	0.0174534	0.0240516	0.0375863	0.0268431	0.0228673	0.0245591	0.0331029	0.0266739	0.0303114	0.0261664	0.0325108	0.0327646	0.0293809	0.0377555	0.0211755	0.0212601	0.0330184	0.0280274	0.022106	0.0224443	0.0302268	0.0223598	0.0283658	0.0276891	0.0336951	0.0207525	0.0369096	0.0291271	0.0293809	0.0272661	0.0230365	0.0246437	0.0283094	0.0248975	0.0317495
cg00495415	0.0277717	0.0259265	0.0206079	0.0317878	0.0220189	0.0372149	0.0195224	0.0263606	0.0283144	0.0313536	0.0213677	0.0251667	0.024841	0.0215847	0.0162661	0.0247325	0.0265777	0.0221275	0.0233214	0.0202822	0.0229958	0.0195224	0.0244069	0.0262521	0.0292913	0.0278802	0.0226702	0.0246239	0.0150722	0.0191968	0.0200651	0.0290742	0.0202822	0.0283144	0.0212591	0.0190883	0.02343	0.027229	0.0235385	0.0237556	0.0305938	0.0270119	0.0211506	0.0235385	0.0175687	0.0330903	0.0363827	0.0297255	0.0263606
cg00495442	0.0614307	0.0553726	0.111389	0.0757876	0.0561195	0.0538788	0.0361194	0.105663	0.086825	0.0704764	0.0703104	0.0744598	0.0914724	0.0561195	0.0442522	0.0464099	0.0447501	0.0567834	0.059439	0.0705594	0.0356214	0.0727171	0.0355384	0.0759536	0.0420115	0.059522	0.0578622	0.0571153	0.0518871	0.0215135	0.0326339	0.0474057	0.038692	0.0469078	0.059688	0.0406007	0.0586091	0.113381	0.0537128	0.0376961	0.0460779	0.0618456	0.0410986	0.0401858	0.0480696	0.0396878	0.0692316	0.0535468	0.0546257
cg00496170	0.0359858	0.0337429	0.0222793	0.0332445	0.0256851	0.0283434	0.0202025	0.0285926	0.0276788	0.0277619	0.0246052	0.0359858	0.0211993	0.0509385	0.0256021	0.0246052	0.0318323	0.027845	0.0229438	0.0288418	0.0304201	0.0413854	0.0275957	0.027928	0.0244391	0.0262666	0.0333276	0.0366504	0.02311	0.0269312	0.0230269	0.0215316	0.0284264	0.0222793	0.0342414	0.0270973	0.0298386	0.0459543	0.0317493	0.0216978	0.0329953	0.032663	0.0222793	0.0379795	0.0217808	0.0271804	0.0256298	0.0216147	0.0250206
cg00497084	0.935607	0.926482	0.404686	0.44213	0.91935	0.510094	0.665741	0.921972	0.889248	0.934243	0.907183	0.907078	0.910959	0.907288	0.485656	0.91484	0.868796	0.757305	0.560124	0.918825	0.901205	0.939487	0.897324	0.902988	0.929733	0.648121	0.455764	0.907183	0.940641	0.656616	0.603336	0.884109	0.907708	0.860615	0.810376	0.895226	0.893024	0.764122	0.616236	0.904561	0.943997	0.898163	0.901624	0.902463	0.893129	0.773142	0.643296	0.659134	0.899317
cg00497251	0.127005	0.103993	0.0849981	0.0773273	0.0727613	0.0755922	0.0878291	0.092669	0.0849981	0.0783318	0.0639032	0.11486	0.0419864	0.0683779	0.0662775	0.0591546	0.0902947	0.0692911	0.0570542	0.0914819	0.0704783	0.0808887	0.0775099	0.079245	0.094952	0.0622595	0.0634466	0.0981482	0.0550452	0.0762314	0.0764141	0.0756835	0.088103	0.0798842	0.0602504	0.0971437	0.103719	0.0736745	0.104267	0.0856374	0.0690171	0.0813453	0.0439041	0.074679	0.0753182	0.0654557	0.0697781	0.0471003	0.0565976
cg00498305	0.233108	0.356062	0.207893	0.424103	0.341578	0.207267	0.5556	0.743781	0.461614	0.706582	0.655734	0.450465	0.467866	0.400971	0.235922	0.546222	0.104007	0.682721	0.188512	0.281352	0.269057	0.389301	0.404097	0.170798	0.46724	0.414933	0.220605	0.220917	0.449214	0.478077	0.272078	0.24332	0.404305	0.450881	0.495686	0.374296	0.141414	0.226231	0.513921	0.51986	0.894555	0.485579	0.31605	0.224147	0.200286	0.493707	0.716898	0.449527	0.285103
cg00498604	0.525289	0.12883	0.752698	0.538849	0.0220559	0.758122	0.612676	0.186787	0.362165	0.759026	0.62704	0.143595	0.87936	0.89081	0.80282	0.739539	0.0330045	0.42635	0.452968	0.276786	0.0276809	0.700265	0.909092	0.345089	0.045962	0.757419	0.660489	0.0528928	0.0425469	0.278494	0.875141	0.436193	0.324699	0.0391317	0.664607	0.330223	0.0375246	0.245146	0.688513	0.606549	0.513034	0.331127	0.437901	0.545077	0.0712743	0.715131	0.836235	0.0461629	0.203963
cg00499599	0.0340152	0.0371612	0.068526	0.0475526	0.0455506	0.0269605	0.0342058	0.0584206	0.0411652	0.0444066	0.0383052	0.0646173	0.0420232	0.0530819	0.0414512	0.0350639	0.0384005	0.0399259	0.0455506	0.0406885	0.0525099	0.0328712	0.0477432	0.0741507	0.0431672	0.0533679	0.0649033	0.0578486	0.0367799	0.0282952	0.0404979	0.0352545	0.0305832	0.060232	0.059946	0.0318225	0.0465992	0.0604226	0.0567046	0.0348732	0.0580393	0.0375425	0.0260071	0.0548933	0.0310598	0.0455506	0.0437074	0.0424046	0.0392585
cg00499822	0.128507	0.618799	0.754236	0.75877	0.715005	0.739845	0.666015	0.768332	0.668282	0.837627	0.586567	0.458326	0.864636	0.391002	0.811112	0.708795	0.570894	0.866607	0.644527	0.5843	0.558967	0.417912	0.825109	0.736198	0.751969	0.73531	0.692629	0.538365	0.833783	0.84019	0.595044	0.382525	0.595635	0.721511	0.652806	0.626981	0.762516	0.47114	0.501894	0.605985	0.599184	0.518553	0.733339	0.776218	0.626882	0.632501	0.836937	0.752758	0.44354
cg00500400	0.0532218	0.0544587	0.0385441	0.0598186	0.0721874	0.0390389	0.0383792	0.0608905	0.0862054	0.090081	0.0389564	0.0556956	0.0500059	0.0874423	0.0524797	0.0530569	0.0650135	0.0494287	0.0422548	0.0578395	0.0538815	0.0318649	0.0691364	0.0879371	0.0806807	0.0860405	0.0416776	0.0696312	0.0406881	0.044811	0.0396161	0.0479445	0.040853	0.0540464	0.047862	0.0480269	0.0523972	0.0459654	0.0602309	0.0702084	0.0552833	0.0374722	0.0500059	0.0421723	0.0598186	0.0368125	0.053799	0.0584168	0.078042
cg00502442	0.0611635	0.016243	0.016148	0.0148185	0.0136788	0.0140587	0.0139638	0.016148	0.0215613	0.0160531	0.0169078	0.0195669	0.0139638	0.0239355	0.0185223	0.0146285	0.0170028	0.0165279	0.0137738	0.0142487	0.0189022	0.0137738	0.0136788	0.0173826	0.0178575	0.0195669	0.0148185	0.0153883	0.013299	0.0151984	0.0135839	0.0232707	0.0158631	0.0199468	0.0319129	0.0168128	0.0130141	0.0211814	0.0133939	0.0150084	0.0230808	0.0118744	0.0148185	0.0160531	0.0174776	0.0166229	0.0205166	0.0150084	0.0182374
cg00503458	0.0831297	0.100704	0.058112	0.0593525	0.0314402	0.0433288	0.0530464	0.071758	0.0656587	0.0775472	0.0386768	0.0766168	0.0738256	0.0382632	0.0417781	0.0483944	0.0711377	0.0686567	0.0870581	0.0642114	0.058939	0.0459133	0.0594559	0.0775472	0.0733087	0.0635911	0.0627641	0.0719648	0.0470504	0.0740324	0.0571816	0.108768	0.0481876	0.0678296	0.0565613	0.0566647	0.0663823	0.0660722	0.0844736	0.0680364	0.0718614	0.0721715	0.0305098	0.0457065	0.0505653	0.0471538	0.0764101	0.0746526	0.0728952
cg00503840	0.782308	0.545645	0.685759	0.699707	0.684763	0.658044	0.556876	0.719089	0.560046	0.736117	0.646089	0.489672	0.779953	0.873695	0.784844	0.49719	0.643915	0.764918	0.663026	0.513764	0.603702	0.767454	0.740917	0.675796	0.741551	0.685125	0.643372	0.663116	0.743453	0.763741	0.747529	0.699345	0.42274	0.681321	0.681955	0.571005	0.631869	0.653697	0.611491	0.531516	0.851414	0.55742	0.677336	0.679148	0.424371	0.578251	0.817963	0.769175	0.700703
cg00504595	0.172815	0.332693	0.146426	0.190104	0.228412	0.273546	0.230505	0.152159	0.223681	0.0913741	0.190013	0.377553	0.11749	0.0692624	0.094104	0.153524	0.105296	0.09374	0.11203	0.253891	0.242426	0.111757	0.0991087	0.174998	0.128409	0.308852	0.158801	0.246338	0.125315	0.0841855	0.076269	0.173543	0.314312	0.106843	0.30048	0.290835	0.13669	0.126498	0.285011	0.146608	0.123222	0.333876	0.100383	0.168538	0.15225	0.243882	0.0703543	0.0961969	0.153251
cg00509616	0.0543475	0.176936	0.200425	0.182682	0.12542	0.098201	0.0986042	0.0274305	0.115138	0.110702	0.205466	0.293677	0.0440646	0.0116029	0.0682596	0.113424	0.0333784	0.0961847	0.0753165	0.14891	0.222806	0.0780384	0.121892	0.0547507	0.0725946	0.13903	0.0527345	0.178045	0.0878173	0.0827766	0.0376125	0.093362	0.182783	0.0501133	0.452457	0.172601	0.0497101	0.0952774	0.209297	0.082071	0.0153329	0.203954	0.0612027	0.055154	0.0560613	0.170685	0.0895983	0.0646304	0.128042
cg00510787	0.260728	0.17842	0.196899	0.130443	0.121542	0.148413	0.064071	0.103826	0.207919	0.188507	0.105945	0.181217	0.11332	0.185625	0.08433	0.203087	0.222244	0.130019	0.106793	0.097384	0.217667	0.151634	0.0912808	0.300992	0.12612	0.243012	0.157568	0.161213	0.0619518	0.130104	0.145446	0.156466	0.119932	0.129425	0.125102	0.121627	0.196221	0.19495	0.153414	0.134342	0.0572049	0.18215	0.214954	0.107132	0.0811089	0.0627147	0.100916	0.105352	0.220125
cg00510956	0.914035	0.945133	0.929087	0.949961	0.832528	0.953653	0.941583	0.943997	0.925537	0.958055	0.944707	0.936897	0.954647	0.742926	0.938743	0.948541	0.869164	0.933915	0.928803	0.943571	0.940447	0.946695	0.950245	0.950671	0.941867	0.937181	0.941725	0.941299	0.953511	0.927667	0.959759	0.8561	0.941725	0.930507	0.922271	0.946979	0.437627	0.924969	0.962173	0.939737	0.930365	0.960327	0.865898	0.898132	0.941867	0.931217	0.736063	0.940589	0.932921
cg00511475	0.273368	0.444441	0.302467	0.459142	0.283034	0.563356	0.367312	0.299849	0.382818	0.853244	0.287968	0.447059	0.674418	0.289478	0.238529	0.330258	0.192815	0.395304	0.285853	0.505661	0.328949	0.570203	0.450986	0.559832	0.187479	0.507272	0.444038	0.32039	0.189493	0.150324	0.380301	0.298641	0.36852	0.363284	0.733926	0.351	0.226043	0.209631	0.497706	0.400137	0.677338	0.329251	0.229467	0.193822	0.427626	0.472534	0.21443	0.43548	0.286357
cg00512279	0.122888	0.410984	0.618566	0.630944	0.654057	0.62229	0.404849	0.635873	0.421609	0.687358	0.509681	0.362128	0.752645	0.487773	0.640584	0.220162	0.209974	0.758013	0.499384	0.381079	0.467945	0.517239	0.63423	0.366838	0.0170708	0.611884	0.582088	0.444065	0.744539	0.40222	0.724383	0.465426	0.252367	0.620209	0.548459	0.432563	0.498946	0.590413	0.533561	0.532247	0.871717	0.401892	0.576721	0.0566154	0.594795	0.462578	0.721535	0.719454	0.640365
cg00512374	0.0753086	0.0544407	0.0520104	0.039607	0.0295502	0.0607262	0.0241866	0.0437135	0.026617	0.0323158	0.0506695	0.0560331	0.0381823	0.0212533	0.0235999	0.0453896	0.0514237	0.0349138	0.0413669	0.0488257	0.0338243	0.0383499	0.0254437	0.0323996	0.032232	0.0267846	0.0343272	0.031813	0.0368414	0.032651	0.0323158	0.0265332	0.0186553	0.0299692	0.0510885	0.0482391	0.0486581	0.0339081	0.0640785	0.0402774	0.029215	0.0476524	0.0278741	0.0505018	0.0227619	0.0350814	0.0504739	0.0273712	0.0242704
cg00513467	0.0754893	0.0421613	0.0795537	0.0472824	0.0345202	0.0472824	0.0411045	0.0679295	0.0511842	0.0563867	0.0578498	0.0663038	0.0280985	0.0544357	0.0302933	0.0447625	0.0433806	0.0327319	0.0440309	0.046876	0.0428116	0.0372027	0.0311874	0.0521597	0.0398039	0.0504526	0.0293991	0.0481766	0.0305371	0.0627271	0.029643	0.0566305	0.0304558	0.0406168	0.438683	0.0654909	0.065816	0.0499649	0.0534603	0.0475263	0.0481766	0.0332196	0.0415923	0.0368776	0.0284236	0.0367963	0.0900669	0.0396414	0.0350892
cg00514407	0.117981	0.19345	0.0534016	0.142919	0.121901	0.242565	0.170036	0.161433	0.0102763	0.170581	0.0774691	0.140741	0.491734	0.0897751	0.0491544	0.0434915	0.115585	0.112536	0.0601536	0.202053	0.0952202	0.0500257	0.0891216	0.110684	0.0470853	0.12299	0.161106	0.236684	0.00395991	0.0800827	0.0651631	0.122119	0.194975	0.0805183	0.48716	0.174066	0.102843	0.0724596	0.297343	0.193015	0.117545	0.13791	0.0280274	0.0210576	0.0934777	0.198024	0.028463	0.103932	0.0569954
cg00514895	0.034304	0.0360793	0.25411	0.361516	0.108978	0.774388	0.437189	0.0663706	0.0672583	0.741433	0.151142	0.0974386	0.798022	0.132501	0.464928	0.0193248	0.246232	0.600518	0.0299767	0.531725	0.0409615	0.523514	0.724235	0.0432916	0.103541	0.544707	0.401572	0.0173276	0.240018	0.548479	0.459048	0.0171057	0.208285	0.0489504	0.660324	0.278632	0.0199906	0.153805	0.0274247	0.315802	0.424651	0.155469	0.0185481	0.517744	0.013666	0.615719	0.257809	0.190421	0.154471
cg00515905	0.240179	0.608404	0.409047	0.458398	0.475695	0.413835	0.48146	0.295296	0.406115	0.350999	0.518302	0.743361	0.245847	0.464359	0.295882	0.357937	0.391847	0.372009	0.321486	0.576057	0.518205	0.253568	0.256206	0.382075	0.329108	0.423608	0.361064	0.557294	0.280833	0.266956	0.248486	0.509507	0.736423	0.336145	0.428494	0.614658	0.368687	0.312398	0.491526	0.42566	0.22728	0.715901	0.359012	0.265099	0.491917	0.438364	0.253503	0.418722	0.41794
cg00516481	0.107025	0.391182	0.54168	0.515838	0.178409	0.615818	0.613382	0.683282	0.421367	0.451021	0.623443	0.403891	0.825414	0.85528	0.231999	0.429522	0.284742	0.359091	0.227551	0.382921	0.313762	0.617194	0.178938	0.496669	0.725011	0.594318	0.433017	0.299676	0.602367	0.416071	0.106496	0.250216	0.410246	0.543905	0.672374	0.370106	0.141234	0.136045	0.550683	0.575889	0.783579	0.435029	0.389699	0.12217	0.499105	0.336215	0.218196	0.666125	0.45547
cg00518989	0.236673	0.0395531	0.030297	0.0380104	0.0309826	0.0219837	0.0208695	0.0492377	0.031154	0.035525	0.0353536	0.0403244	0.0258404	0.0254118	0.0294399	0.035525	0.0348393	0.0402387	0.0296114	0.0359535	0.0371533	0.0360392	0.0278116	0.0371533	0.0300399	0.0342394	0.045381	0.0354393	0.0338109	0.0280687	0.0652644	0.0234406	0.0274687	0.0235263	0.0338109	0.0319254	0.0249833	0.0325253	0.0334681	0.0278973	0.0506089	0.0344108	0.0300399	0.0342394	0.0230978	0.0337252	0.0303256	0.0235263	0.0283258
cg00519208	0.526221	0.602667	0.527144	0.432355	0.385114	0.295552	0.807719	0.431945	0.475804	0.472217	0.49302	0.751255	0.764577	0.702682	0.187441	0.515359	0.346891	0.88355	0.358778	0.582275	0.478468	0.520483	0.433072	0.265014	0.805259	0.287968	0.332237	0.543847	0.354884	0.120935	0.194307	0.577664	0.696431	0.33152	0.460433	0.685774	0.306209	0.369641	0.613735	0.514847	0.589756	0.836616	0.654007	0.118578	0.409503	0.404379	0.140371	0.685262	0.853832
cg00519627	0.0138207	0.0120484	0.0153132	0.013914	0.0130745	0.0143804	0.0113955	0.0153132	0.0192308	0.0150333	0.012235	0.0141005	0.0114887	0.0138207	0.0113955	0.0136341	0.0123282	0.0113955	0.0156863	0.01494	0.0161527	0.011582	0.0129812	0.0177384	0.0127946	0.018951	0.0140073	0.0138207	0.0118619	0.0103694	0.0103694	0.0111156	0.011582	0.0154997	0.0131678	0.0130745	0.0130745	0.0184846	0.0141005	0.0138207	0.01494	0.0135409	0.0118619	0.0160594	0.0107425	0.013914	0.0159661	0.0143804	0.0177384
cg00520135	0.348857	0.678155	0.776431	0.646574	0.479142	0.832848	0.682116	0.963775	0.641115	0.845588	0.7274	0.720227	0.72558	0.319418	0.601291	0.768081	0.843982	0.775039	0.717337	0.765725	0.73757	0.878774	0.746563	0.756412	0.930695	0.737784	0.808012	0.746349	0.931017	0.358599	0.860361	0.69614	0.65728	0.86368	0.749881	0.748169	0.499911	0.820002	0.859612	0.762193	0.797734	0.790134	0.775467	0.648287	0.685114	0.641971	0.693999	0.643898	0.822464
cg00520708	0.059941	0.102448	0.0550694	0.154889	0.102639	0.0703528	0.0848719	0.0573619	0.110663	0.0824839	0.108848	0.101779	0.0724542	0.0526814	0.0558336	0.159378	0.114961	0.0763706	0.195294	0.123558	0.0757019	0.110949	0.0757019	0.0809556	0.0923226	0.0668185	0.132537	0.129194	0.0943285	0.10837	0.103498	0.124274	0.0949971	0.140561	0.0859227	0.0832481	0.146005	0.143235	0.123367	0.0777079	0.0931822	0.100919	0.0889793	0.165396	0.0841078	0.110758	0.0964618	0.085063	0.0825794
cg00521434	0.86618	0.894953	0.668969	0.905559	0.967516	0.922571	0.926457	0.918476	0.898209	0.928977	0.926247	0.91585	0.936853	0.940843	0.943678	0.927927	0.902724	0.96069	0.909025	0.943573	0.867125	0.900939	0.883612	0.898839	0.961425	0.930657	0.898419	0.91291	0.944098	0.923936	0.501267	0.950084	0.872796	0.871851	0.935067	0.95544	0.756864	0.890753	0.81798	0.929187	0.953864	0.922361	0.913225	0.933702	0.934857	0.901254	0.888268	0.947774	0.950609
cg00521598	0.0407538	0.0529423	0.0369786	0.0517558	0.0438819	0.0412932	0.0521873	0.0488436	0.0486278	0.0575804	0.0497065	0.0479806	0.0393516	0.0694454	0.0467942	0.0334192	0.0429111	0.0320169	0.0404302	0.0495986	0.0559625	0.0373022	0.0330956	0.0522952	0.0611399	0.0580119	0.0498143	0.0501379	0.040646	0.052403	0.0549917	0.0392438	0.0408617	0.0505694	0.0598456	0.0416167	0.0530502	0.0512165	0.0643758	0.0410774	0.0425875	0.0402145	0.0420482	0.036655	0.0385966	0.0463627	0.0486997	0.0710633	0.0510008
cg00522034	0.0328395	0.0137143	0.0124393	0.0157543	0.0100592	0.0137993	0.0112493	0.0142243	0.0137993	0.0132043	0.0132043	0.0137143	0.0157543	0.0171143	0.0107392	0.0111643	0.0171993	0.0116743	0.0110792	0.0136293	0.0109942	0.0132043	0.0137143	0.0126943	0.0102292	0.0120993	0.0124393	0.0122693	0.0109942	0.00835921	0.0107392	0.0126943	0.0121843	0.0120143	0.0140543	0.0153293	0.0113343	0.0121843	0.0132893	0.0120143	0.0173693	0.0115893	0.00946423	0.0109092	0.00835921	0.0119293	0.0173127	0.0113343	0.0135443
cg00522316	0.0197343	0.0720624	0.0431636	0.0595722	0.057613	0.0578579	0.0354899	0.0539394	0.0487147	0.0442248	0.0558986	0.0554088	0.0284692	0.0581028	0.0360613	0.0375307	0.0363062	0.0453677	0.0375307	0.0501025	0.0490413	0.0542659	0.0338572	0.0511638	0.0356531	0.036796	0.0468371	0.0828382	0.0267549	0.0326326	0.0305918	0.0336939	0.0471637	0.0405512	0.0372858	0.0365511	0.0533679	0.0468371	0.0584293	0.0401431	0.0388369	0.0526332	0.0400614	0.042837	0.0450412	0.047082	0.0456126	0.034347	0.0496127
cg00524288	0.0311743	0.0433595	0.0472211	0.0364088	0.0339203	0.0497954	0.0442177	0.0318608	0.0369237	0.0447325	0.0265404	0.0420724	0.0312601	0.0371811	0.021735	0.0311743	0.0354649	0.0256823	0.0386399	0.0430163	0.0470495	0.0531421	0.0358081	0.0377818	0.0314317	0.0461913	0.0300587	0.0538286	0.0243951	0.0332338	0.0260256	0.036752	0.0334912	0.0312601	0.0553732	0.0346067	0.0434454	0.0400129	0.0571752	0.0302303	0.0301445	0.0281709	0.0277418	0.0350358	0.0425872	0.0214775	0.0441605	0.0328905	0.0479076
cg00528052	0.0254095	0.0320463	0.0263576	0.0313568	0.028771	0.0258405	0.0151525	0.0217894	0.0277367	0.0286848	0.0266162	0.0345459	0.0272195	0.0326497	0.0250647	0.022048	0.0281677	0.0404071	0.0268748	0.0281677	0.0239442	0.0304949	0.0201517	0.024289	0.023858	0.0232547	0.0218756	0.0317878	0.0279953	0.0233409	0.0262714	0.0178245	0.0248923	0.0259267	0.0387694	0.019376	0.0214446	0.0279953	0.0282539	0.0304949	0.0275643	0.0276505	0.028771	0.0173074	0.0227375	0.0186003	0.0376202	0.0242028	0.0300639
cg00528967	0.0136651	0.0169262	0.0194956	0.0189026	0.0115899	0.0158392	0.0138628	0.0154439	0.0228555	0.0150486	0.0156416	0.015938	0.0117875	0.0139616	0.013171	0.0146533	0.0111946	0.0107993	0.0108982	0.0163333	0.0207802	0.0160368	0.0142581	0.0205826	0.0171239	0.0178156	0.0141592	0.0326387	0.014851	0.0162345	0.0125781	0.013764	0.0122817	0.0196932	0.0175191	0.0147522	0.0189026	0.0209779	0.013764	0.0178156	0.0191991	0.0150486	0.0114911	0.0215708	0.0133687	0.0156416	0.0140604	0.0173215	0.0180132
cg00532335	0.6984	0.642523	0.372793	0.556939	0.497416	0.410652	0.643596	0.758352	0.648422	0.626436	0.629546	0.60016	0.605952	0.776477	0.35188	0.715024	0.322172	0.625793	0.297933	0.517793	0.541924	0.650889	0.398104	0.553722	0.696362	0.620323	0.411081	0.588256	0.841791	0.811547	0.41655	0.489694	0.512431	0.479076	0.430171	0.46803	0.37955	0.602305	0.498488	0.689177	0.63759	0.540852	0.4158	0.527446	0.629439	0.481221	0.442648	0.59512	0.450119
cg00532890	0.0419753	0.0485427	0.035408	0.0396477	0.0292562	0.0289237	0.0425573	0.038567	0.0476283	0.0400633	0.0313345	0.0567727	0.0810471	0.0378188	0.0290069	0.100666	0.0555258	0.0448849	0.0603474	0.0361562	0.0480439	0.0330803	0.0453837	0.0609293	0.0574378	0.0412272	0.0510367	0.0449681	0.0273442	0.0394814	0.0395645	0.0304201	0.046215	0.0838736	0.052533	0.0388995	0.0402296	0.0344935	0.0681617	0.058186	0.0444693	0.0822109	0.0579366	0.0415597	0.0461319	0.0438874	0.0569944	0.032249	0.052533
cg00534274	0.0574261	0.219776	0.0996656	0.186377	0.130117	0.107792	0.116811	0.116722	0.135118	0.104041	0.126277	0.207988	0.0531397	0.10556	0.0549257	0.0808231	0.191021	0.122795	0.104667	0.181912	0.128867	0.086449	0.0540327	0.1336	0.0668921	0.105649	0.102791	0.142709	0.127974	0.0778761	0.0543899	0.148067	0.300504	0.10038	0.135654	0.179233	0.0858239	0.117883	0.145566	0.134315	0.0547471	0.14637	0.0976117	0.0694818	0.168517	0.107971	0.0794538	0.108328	0.120651
cg00536175	0.938319	0.926012	0.745377	0.884228	0.951023	0.827258	0.89842	0.938021	0.932463	0.944075	0.899214	0.921347	0.940205	0.946259	0.931967	0.883037	0.923233	0.940006	0.87063	0.935441	0.920355	0.925317	0.870729	0.931272	0.929089	0.805919	0.831426	0.804927	0.961047	0.900505	0.687414	0.81773	0.880555	0.887701	0.807209	0.840557	0.830533	0.758478	0.745972	0.926508	0.948939	0.939311	0.889686	0.856834	0.915888	0.8879	0.905864	0.931669	0.932066
cg00537910	0.864296	0.881124	0.887206	0.916502	0.89197	0.885381	0.929376	0.906669	0.877677	0.904642	0.907074	0.905655	0.892781	0.887206	0.927754	0.926639	0.901094	0.912447	0.902716	0.878184	0.881529	0.907176	0.89937	0.870987	0.928362	0.861762	0.917009	0.916502	0.945595	0.884165	0.911839	0.936472	0.858214	0.909406	0.893795	0.897343	0.885685	0.8572	0.911332	0.906973	0.907581	0.909811	0.910622	0.893694	0.900384	0.884976	0.902851	0.866729	0.894302
cg00539322	0.871257	0.878447	0.78095	0.900016	0.843697	0.888796	0.882695	0.908622	0.868316	0.909385	0.890212	0.882151	0.871039	0.888687	0.840211	0.881061	0.842825	0.922893	0.83923	0.854917	0.866355	0.8925	0.894352	0.872456	0.897511	0.883131	0.853283	0.889123	0.910583	0.872347	0.878992	0.819513	0.907097	0.859274	0.849034	0.866246	0.881497	0.869079	0.895659	0.86581	0.899472	0.895768	0.867445	0.831278	0.889667	0.855135	0.834909	0.890539	0.874416
cg00539716	0.075126	0.0884988	0.0803545	0.0735172	0.045565	0.0734167	0.0476765	0.0684898	0.0777402	0.0592395	0.060446	0.076232	0.0749249	0.0465704	0.0463694	0.0467715	0.0500896	0.0759304	0.041342	0.0714057	0.0777402	0.0656745	0.0614515	0.0808572	0.0781424	0.0729139	0.0675849	0.0860857	0.0649707	0.0645685	0.065574	0.0471737	0.0636636	0.0445595	0.0525028	0.0643674	0.0696964	0.0759304	0.0795501	0.0495869	0.0614515	0.0670822	0.0523017	0.0471737	0.0705008	0.0479781	0.061418	0.0567258	0.0461683
cg00540544	0.0672423	0.0361614	0.0655252	0.0313533	0.0344442	0.0306664	0.0241411	0.0231108	0.0269744	0.0359038	0.0310098	0.0269744	0.0245704	0.0507574	0.0223381	0.0287775	0.0183885	0.0310098	0.0422574	0.0355604	0.0439745	0.0243128	0.0308381	0.0383937	0.0411412	0.0326411	0.0251714	0.0356462	0.0158128	0.0180451	0.0308381	0.0215653	0.0268027	0.0390806	0.0524746	0.0230249	0.0325553	0.0343583	0.0261159	0.0273179	0.0241411	0.0316108	0.0256007	0.0408836	0.0234542	0.0338432	0.0331563	0.0416563	0.0334139
cg00544557	0.544879	0.777792	0.570221	0.620262	0.883134	0.528879	0.857684	0.839215	0.642705	0.818812	0.749335	0.771349	0.880879	0.940476	0.603725	0.602544	0.556584	0.373067	0.417953	0.794221	0.73602	0.870785	0.638409	0.653228	0.615644	0.552826	0.439644	0.65151	0.922651	0.645174	0.238195	0.65602	0.816235	0.781228	0.581067	0.776825	0.477228	0.331081	0.630356	0.839322	0.527268	0.669658	0.578705	0.559376	0.49194	0.706597	0.839429	0.867671	0.763403
cg00545573	0.0593331	0.0543107	0.0430104	0.0575543	0.0543107	0.0799456	0.046254	0.0558802	0.0681222	0.0542061	0.0742955	0.0720982	0.0437429	0.0723075	0.0341167	0.0588099	0.0726214	0.055357	0.0469865	0.0412317	0.0502301	0.0664481	0.0446846	0.0515903	0.0683315	0.0444753	0.0642508	0.0623674	0.0446846	0.0524273	0.0502301	0.10715	0.0476143	0.0791086	0.046254	0.0672851	0.0669712	0.0587053	0.0678083	0.0703195	0.0599609	0.0554617	0.0583914	0.103906	0.0465679	0.0571358	0.0538922	0.0772252	0.0556709
cg00546491	0.652207	0.418998	0.613858	0.60918	0.635785	0.622574	0.479456	0.652023	0.482942	0.732206	0.573675	0.435236	0.718261	0.585143	0.654042	0.596978	0.463401	0.722023	0.588813	0.464777	0.508355	0.677252	0.737068	0.500924	0.606702	0.611932	0.586978	0.453126	0.746151	0.760188	0.686335	0.587895	0.329273	0.650372	0.5834	0.49707	0.698261	0.384319	0.621932	0.570464	0.826792	0.506336	0.629546	0.579638	0.614776	0.533217	0.758781	0.702849	0.43441
cg00546897	0.0672921	0.405596	0.295662	0.392792	0.270555	0.279257	0.300564	0.224541	0.293862	0.216338	0.35358	0.537437	0.196532	0.19113	0.218039	0.226841	0.261352	0.242046	0.235344	0.342877	0.371186	0.201033	0.203334	0.326972	0.265553	0.28946	0.266153	0.35258	0.170724	0.150518	0.128511	0.344077	0.473517	0.266353	0.390692	0.433005	0.270155	0.242546	0.364984	0.248748	0.12581	0.380589	0.227241	0.192731	0.317269	0.362183	0.187662	0.202034	0.334674
cg00547018	0.163216	0.0859127	0.0683207	0.12837	0.0547884	0.0547884	0.0723804	0.0926788	0.0777933	0.12448	0.0585098	0.0969077	0.0671366	0.0754252	0.0351666	0.100629	0.112977	0.073057	0.134291	0.110102	0.0637536	0.0874351	0.0603705	0.0786391	0.0402412	0.0596939	0.122281	0.107226	0.10638	0.0759326	0.0684899	0.070858	0.0669675	0.106549	0.168629	0.116191	0.0661217	0.0706889	0.191972	0.0713655	0.115684	0.0996141	0.111793	0.106888	0.0727187	0.113146	0.133163	0.124649	0.0793157
cg00547789	0.916822	0.353803	0.274648	0.625046	0.0294818	0.719601	0.629358	0.200728	0.505646	0.816621	0.0195232	0.0248619	0.730484	0.0228085	0.834176	0.0278392	0.100629	0.0211659	0.0249645	0.0683922	0.0218846	0.0159299	0.837359	0.0208579	0.429878	0.659131	0.108842	0.0363604	0.010694	0.0615136	0.746603	0.380907	0.309143	0.169415	0.605232	0.484497	0.289021	0.652047	0.584699	0.551743	0.659747	0.0209606	0.706666	0.708513	0.226806	0.605745	0.295386	0.273826	0.111409
cg00547829	0.0280731	0.0436623	0.0633184	0.0336649	0.0350205	0.0295134	0.0376469	0.0395956	0.068656	0.0417984	0.0454415	0.0489152	0.0758575	0.0395109	0.0262092	0.0361219	0.0374775	0.0260397	0.0548459	0.0294287	0.0512875	0.0311232	0.0262092	0.0485763	0.0408664	0.0440012	0.043154	0.0351899	0.0255314	0.0355288	0.0528126	0.0466277	0.0229896	0.0626406	0.0470513	0.0325635	0.036715	0.0501014	0.0321399	0.0368844	0.05205	0.0392567	0.0482374	0.0464582	0.0282425	0.0295981	0.0547612	0.0387483	0.0390872
cg00548060	0.91654	0.919934	0.742093	0.935834	0.904303	0.873665	0.892512	0.92574	0.905821	0.939317	0.924847	0.895906	0.930742	0.954055	0.930117	0.927348	0.912699	0.948875	0.901802	0.92976	0.921185	0.924936	0.890726	0.929134	0.943426	0.912431	0.799259	0.917969	0.936995	0.926723	0.671617	0.902784	0.930028	0.909394	0.933601	0.9244	0.925115	0.923954	0.942086	0.927973	0.933779	0.940389	0.912431	0.920649	0.907608	0.910019	0.925561	0.936816	0.934583
cg00548268	0.907364	0.605726	0.767157	0.786843	0.585751	0.730184	0.6717	0.768117	0.652974	0.818534	0.724326	0.470608	0.883068	0.4587	0.805282	0.694556	0.35316	0.824968	0.727303	0.628486	0.511902	0.740652	0.775127	0.617538	0.247525	0.729512	0.714435	0.615329	0.833323	0.81258	0.768213	0.548683	0.498074	0.716067	0.65912	0.627333	0.73998	0.729128	0.697725	0.6596	0.890463	0.59401	0.736234	0.741036	0.671988	0.673621	0.84203	0.805474	0.750447
cg00550617	0.190573	0.44742	0.271565	0.372603	0.290895	0.256798	0.392828	0.275234	0.307631	0.328841	0.354973	0.584434	0.255545	0.36598	0.136161	0.271296	0.283825	0.203639	0.186188	0.406431	0.333763	0.247222	0.190483	0.219748	0.231561	0.306288	0.347455	0.376541	0.159966	0.126674	0.182966	0.450462	0.486618	0.19809	0.377973	0.43668	0.147705	0.348261	0.422003	0.18046	0.106986	0.460754	0.178939	0.195406	0.231829	0.287136	0.159399	0.232456	0.28651
cg00554250	0.559588	0.563318	0.627376	0.752641	0.632203	0.684963	0.658638	0.773592	0.638564	0.863098	0.690776	0.526572	0.877686	0.817577	0.719405	0.792568	0.815493	0.875383	0.676517	0.385951	0.65776	0.864633	0.831398	0.651727	0.864304	0.744853	0.761745	0.738381	0.826681	0.844012	0.850045	0.714798	0.615969	0.819551	0.729058	0.579003	0.765475	0.773592	0.644597	0.739698	0.683098	0.515493	0.571654	0.846644	0.769314	0.649424	0.830959	0.833482	0.759771
cg00554682	0.856254	0.0666676	0.407628	0.549049	0.0641902	0.651141	0.331652	0.416815	0.347549	0.55772	0.51901	0.213663	0.668071	0.230593	0.666729	0.134591	0.521694	0.811557	0.512197	0.141404	0.101146	0.320504	0.716691	0.0697645	0.380066	0.588689	0.520352	0.0694548	0.384195	0.0569643	0.32391	0.0487061	0.148424	0.64629	0.544507	0.236167	0.160605	0.429306	0.335472	0.539449	0.865545	0.336091	0.402157	0.0590288	0.574134	0.440557	0.0651536	0.106204	0.590444
cg00554702	0.0997981	0.0617388	0.0645236	0.0980576	0.0588379	0.062435	0.0605785	0.089587	0.105368	0.0980576	0.0778676	0.0852938	0.134608	0.0811165	0.0615067	0.0745026	0.0750827	0.0949246	0.092836	0.0703253	0.0798402	0.0631312	0.110473	0.0833212	0.0834372	0.129039	0.086222	0.0890069	0.0794921	0.0671924	0.0797241	0.07926	0.0564012	0.0767072	0.110937	0.0782157	0.0710215	0.0842495	0.103743	0.0745026	0.0669603	0.0933001	0.0700933	0.107108	0.0649878	0.0777515	0.0777902	0.0364433	0.194714
cg00556408	0.706216	0.789868	0.798034	0.853295	0.651619	0.848453	0.849497	0.829557	0.820727	0.793761	0.791957	0.78493	0.711723	0.889092	0.840477	0.372747	0.744006	0.845699	0.735651	0.804775	0.51223	0.833071	0.754831	0.809618	0.849022	0.651239	0.589521	0.466274	0.812371	0.715711	0.601389	0.799363	0.798223	0.813226	0.823575	0.801737	0.59047	0.644687	0.851586	0.776195	0.769643	0.798888	0.665956	0.729099	0.75673	0.587716	0.77572	0.667096	0.62038
cg00557354	0.0646374	0.40791	0.630015	0.725263	0.132175	0.75898	0.10615	0.096457	0.230163	0.871296	0.0879226	0.438149	0.791958	0.327307	0.798807	0.150087	0.0875011	0.376723	0.479241	0.471549	0.0937176	0.283266	0.705455	0.0886601	0.0766487	0.751183	0.6808	0.0880279	0.0655856	0.109733	0.773941	0.225527	0.376301	0.31066	0.605466	0.460802	0.0689572	0.146821	0.640446	0.152826	0.78806	0.324146	0.318246	0.0759112	0.0657964	0.539614	0.347994	0.076438	0.40359
cg00559473	0.10935	0.0510025	0.0643097	0.0742048	0.0524526	0.0579973	0.0492111	0.0799201	0.0649068	0.0760815	0.0380365	0.0667835	0.0991132	0.0376099	0.0634567	0.0468226	0.0442636	0.0347096	0.0499788	0.0395719	0.0721575	0.0554382	0.0512584	0.0450313	0.0453725	0.0523673	0.0458843	0.0386336	0.0480169	0.0398278	0.0457137	0.0371834	0.0517702	0.0588503	0.0580826	0.0452019	0.0407661	0.063542	0.087512	0.0469079	0.0571443	0.0558647	0.0515996	0.0600446	0.0479316	0.0390601	0.0436949	0.0594474	0.0403396
cg00560119	0.0312712	0.0296353	0.0246415	0.0333376	0.0245554	0.0257608	0.0257608	0.0270523	0.0320461	0.035404	0.0237805	0.0359206	0.0292048	0.0240388	0.0246415	0.0318739	0.0239527	0.0238666	0.033682	0.0299797	0.0341986	0.0307546	0.0329071	0.0376426	0.0255025	0.035404	0.0428947	0.0267079	0.0243832	0.0267079	0.041431	0.03196	0.0292909	0.0361789	0.0465108	0.0260191	0.0274828	0.0313573	0.0358345	0.0279133	0.0346291	0.0392785	0.0292909	0.0304963	0.0251581	0.0242971	0.0398238	0.0256747	0.0340264
cg00563229	0.0413389	0.0259579	0.0221817	0.0275236	0.0221817	0.0268789	0.0241158	0.0277078	0.0228264	0.0200633	0.029734	0.0292735	0.0167476	0.030563	0.0198791	0.0200633	0.0254052	0.0249447	0.022458	0.0245763	0.0290893	0.028813	0.023379	0.0351681	0.0265105	0.0296419	0.0185897	0.0255894	0.0202475	0.0211685	0.0177608	0.0208001	0.0177608	0.0270631	0.026971	0.0184976	0.0208001	0.0219975	0.0287209	0.0208922	0.0262342	0.029734	0.0258657	0.0249447	0.0246684	0.019787	0.0350146	0.0200633	0.019787
cg00563845	0.251402	0.174388	0.102615	0.155645	0.0575788	0.229373	0.229906	0.184337	0.105724	0.0939984	0.197927	0.29555	0.115761	0.131484	0.0680605	0.28569	0.0810295	0.138679	0.069393	0.143565	0.307986	0.172434	0.122246	0.131306	0.257087	0.166926	0.165683	0.167193	0.124111	0.0659287	0.110698	0.235235	0.127575	0.124644	0.261262	0.238966	0.083339	0.105635	0.155201	0.108389	0.229195	0.277606	0.0962191	0.0992393	0.141166	0.178652	0.196891	0.0854709	0.157511
cg00563926	0.0811743	0.305219	0.165179	0.60095	0.154577	0.143471	0.234341	0.680613	0.127013	0.0938961	0.449299	0.365496	0.136706	0.231312	0.560362	0.100257	0.129032	0.293204	0.132768	0.244639	0.369737	0.390132	0.287853	0.163765	0.65315	0.529971	0.407195	0.241206	0.114998	0.280785	0.15801	0.202738	0.337024	0.184261	0.462626	0.512706	0.15488	0.140745	0.540572	0.422542	0.783902	0.279978	0.0957135	0.261905	0.217681	0.113686	0.112137	0.342375	0.14549
cg00563932	0.765369	0.682922	0.343008	0.707475	0.749893	0.611271	0.73604	0.801195	0.677286	0.785432	0.756485	0.634677	0.741008	0.806067	0.582324	0.718844	0.528537	0.768426	0.36307	0.691425	0.600762	0.71636	0.601908	0.605157	0.669356	0.616621	0.538473	0.710054	0.76728	0.801864	0.631333	0.622258	0.648816	0.624168	0.648625	0.670121	0.470165	0.558249	0.695629	0.734416	0.862433	0.682063	0.618627	0.525385	0.6299	0.687986	0.765783	0.682158	0.651873
cg00564163	0.0323558	0.153812	0.0767826	0.123659	0.0796543	0.136919	0.126108	0.109131	0.122561	0.077036	0.0986581	0.231938	0.297565	0.0657181	0.0645357	0.0697723	0.0731507	0.0612417	0.0563429	0.0954486	0.151024	0.0606504	0.050684	0.0642823	0.0313423	0.089114	0.184049	0.0978135	0.0317646	0.0397884	0.145196	0.0953641	0.22155	0.0640289	0.167579	0.167832	0.0721372	0.0636066	0.168254	0.107189	0.239709	0.247057	0.0521198	0.0474744	0.0533867	0.147899	0.0503743	0.100432	0.0785563
cg00565075	0.0817881	0.210359	0.175444	0.201136	0.129769	0.179287	0.41425	0.253399	0.171931	0.714762	0.314885	0.239785	0.406125	0.574882	0.232209	0.379555	0.0966106	0.157877	0.113629	0.27986	0.0666363	0.295561	0.514494	0.467721	0.139102	0.363195	0.128781	0.084533	0.33344	0.0741024	0.157108	0.118789	0.223205	0.131196	0.492645	0.240224	0.149313	0.0537902	0.271296	0.195317	0.407662	0.275029	0.259877	0.138223	0.223535	0.300282	0.092109	0.368465	0.217606
cg00565688	0.0502756	0.513164	0.523204	0.379432	0.542353	0.70248	0.472692	0.544838	0.349207	0.701238	0.227275	0.460996	0.736017	0.0443757	0.729186	0.431703	0.036095	0.0344389	0.617914	0.54225	0.221685	0.0388897	0.703619	0.220029	0.0372336	0.105445	0.411519	0.0603159	0.0649738	0.0410634	0.17138	0.307804	0.19881	0.565643	0.636028	0.570715	0.0429266	0.0769807	0.630542	0.0688036	0.821618	0.200362	0.0945771	0.195912	0.0567966	0.578271	0.0589013	0.51099	0.0780158
cg00566759	0.0425485	0.0387511	0.0479145	0.0418881	0.0377604	0.0348711	0.0399068	0.0295877	0.0406498	0.0282668	0.0525375	0.0759	0.0287621	0.0243868	0.0326421	0.0344583	0.0266983	0.0226532	0.0266983	0.0366872	0.0479145	0.0340455	0.0300004	0.0375128	0.0325596	0.0461809	0.032477	0.0474192	0.0333026	0.0382558	0.0168745	0.0356141	0.0318166	0.0326421	0.0283494	0.0569128	0.0244694	0.0423834	0.053363	0.0366872	0.0411451	0.109747	0.0366047	0.0316515	0.0403196	0.0449426	0.042466	0.0345409	0.0375128
cg00567479	0.121995	0.0234561	0.0246737	0.0255434	0.0291962	0.0282396	0.0291962	0.0304138	0.0341536	0.0264132	0.0281526	0.0230213	0.0277177	0.0424159	0.0322403	0.0280656	0.0285874	0.0244998	0.0336318	0.0224125	0.0314575	0.0248477	0.0291093	0.0339797	0.0248477	0.0307617	0.0241519	0.0242389	0.0274568	0.020673	0.0278047	0.0370237	0.0245868	0.0294572	0.0447642	0.0321533	0.0274568	0.0304138	0.0203251	0.0261522	0.0303269	0.0225864	0.0310226	0.0339797	0.0283265	0.0236301	0.0362699	0.032936	0.0322403
cg00567749	0.0569722	0.18462	0.749168	0.627645	0.74139	0.51808	0.688406	0.607909	0.432819	0.879149	0.631242	0.103832	0.819068	0.0318898	0.6292	0.551814	0.104998	0.554342	0.293408	0.479387	0.173051	0.344544	0.836178	0.414347	0.217772	0.756556	0.699781	0.388001	0.0594999	0.848331	0.26677	0.39257	0.241493	0.426111	0.769681	0.0462782	0.106554	0.571064	0.683643	0.248104	0.896746	0.325879	0.537523	0.604896	0.262687	0.660505	0.165987	0.806138	0.16751
cg00568128	0.0795727	0.0699929	0.0616274	0.0655403	0.0366659	0.0571748	0.0489443	0.0674293	0.0668896	0.0784933	0.0604131	0.0609528	0.0447616	0.0307292	0.0776837	0.0509682	0.0397693	0.0411185	0.0400391	0.080922	0.071612	0.0388248	0.0523175	0.0454362	0.0542064	0.0608179	0.0416582	0.0546112	0.0675642	0.0597384	0.051373	0.0188556	0.058659	0.0399042	0.0515079	0.0554208	0.0689135	0.0609528	0.089962	0.0467855	0.0319435	0.073501	0.0350468	0.0632465	0.0350468	0.045706	0.0607279	0.0304593	0.0587939
cg00568792	0.0549777	0.0505292	0.0652435	0.0518124	0.0414611	0.0469362	0.0548066	0.115888	0.0587418	0.0523257	0.0397502	0.0542078	0.0363283	0.074996	0.0473639	0.046594	0.0414611	0.0478772	0.0408623	0.053609	0.0486472	0.0526679	0.0335052	0.040349	0.060795	0.0422311	0.0430865	0.0526679	0.0470218	0.0395791	0.0660134	0.0364993	0.0466796	0.0510425	0.0714885	0.0424022	0.0508714	0.0671256	0.0529246	0.0382959	0.0696064	0.0512136	0.0494171	0.0584852	0.0585707	0.047535	0.0525253	0.0471929	0.0504437
cg00569620	0.0696982	0.0427298	0.0336046	0.0472925	0.052018	0.0501441	0.0313232	0.0579657	0.0536475	0.0358859	0.0421595	0.0478628	0.045337	0.0391449	0.0406115	0.0510403	0.0413447	0.0235016	0.0391449	0.0352341	0.0541364	0.0357229	0.0344193	0.0540549	0.037271	0.0402041	0.0427298	0.0459888	0.0474554	0.0241534	0.0290419	0.0387375	0.0424039	0.0534846	0.0357229	0.0410188	0.0384931	0.0402041	0.0423224	0.0459888	0.0477813	0.0461518	0.0424039	0.0397967	0.0408559	0.0299382	0.0455271	0.0337675	0.0411003
cg00571634	0.0487865	0.0960921	0.0752658	0.086869	0.0591997	0.079431	0.0856789	0.0731831	0.0803236	0.0949021	0.071398	0.0895467	0.0702079	0.0580096	0.078836	0.0880591	0.0841913	0.079431	0.0856789	0.0940095	0.0946045	0.0654476	0.0696129	0.0806211	0.110373	0.10115	0.0764558	0.0779434	0.0871665	0.0556295	0.0740757	0.0705054	0.0797286	0.111266	0.100555	0.0818112	0.0815137	0.0892492	0.102935	0.0871665	0.0791335	0.078836	0.0928194	0.0800261	0.0889517	0.0764558	0.0991665	0.0702079	0.0687203
cg00573606	0.406535	0.617128	0.296126	0.693925	0.597113	0.4817	0.611581	0.768003	0.764087	0.838382	0.710895	0.68642	0.519772	0.852741	0.328106	0.853611	0.678153	0.828483	0.501715	0.498343	0.49334	0.846867	0.727429	0.768764	0.266756	0.732977	0.481918	0.569593	0.940307	0.800092	0.324517	0.731127	0.486487	0.661292	0.795415	0.555778	0.483658	0.35628	0.388369	0.698712	0.498343	0.755058	0.416325	0.529671	0.589825	0.754515	0.520969	0.562413	0.362806
cg00575744	0.105093	0.164939	0.0477598	0.0825656	0.0811153	0.0668063	0.098905	0.124816	0.0616821	0.278831	0.0860462	0.119982	0.214441	0.122012	0.0641959	0.0592651	0.0922339	0.0699002	0.0381882	0.116695	0.32814	0.140285	0.131584	0.0868196	0.132744	0.0887533	0.0360612	0.114761	0.0256195	0.0770547	0.0501769	0.0882699	0.178765	0.0760878	0.0855628	0.149953	0.0899135	0.0677731	0.092814	0.0794717	0.103836	0.0603286	0.0573314	0.554861	0.101419	0.0766679	0.109186	0.0702869	0.0976481
cg00576250	0.501646	0.447069	0.0740086	0.31882	0.4382	0.631356	0.52283	0.180344	0.0790175	0.645861	0.0623211	0.155821	0.809591	0.106671	0.0631559	0.0719215	0.0542859	0.274261	0.326646	0.446965	0.0677474	0.238573	0.68802	0.220207	0.75731	0.065243	0.306611	0.0629472	0.0707736	0.0479204	0.0295543	0.0568947	0.193597	0.273531	0.56384	0.0788088	0.0647212	0.0737999	0.34376	0.210293	0.224276	0.348456	0.214363	0.0791219	0.0675387	0.369953	0.062495	0.243999	0.306089
cg00577167	0.117243	0.490814	0.264951	0.41632	0.310709	0.288105	0.371843	0.272181	0.417509	0.41998	0.359122	0.71503	0.535932	0.180481	0.245184	0.332124	0.224684	0.174441	0.212787	0.522753	0.420072	0.270076	0.420163	0.428125	0.174807	0.29204	0.232005	0.402775	0.194483	0.0842974	0.230724	0.569061	0.507562	0.337432	0.416137	0.515524	0.208211	0.209126	0.597156	0.289935	0.168401	0.527695	0.153026	0.172428	0.366901	0.353173	0.121087	0.311442	0.256074
cg00577464	0.0344386	0.0397984	0.0372079	0.0360466	0.0417637	0.0386371	0.033992	0.0282749	0.0582897	0.0297935	0.0232724	0.0774062	0.0655254	0.024523	0.0325627	0.0252377	0.0209498	0.0237191	0.0385478	0.0564137	0.0433716	0.0366719	0.0379225	0.0676693	0.0257736	0.0472128	0.0361359	0.0316694	0.0319374	0.0232724	0.0224684	0.0265776	0.0353319	0.0252377	0.0296148	0.0406917	0.0364039	0.0432823	0.0775849	0.0347959	0.0271136	0.0563244	0.0247017	0.0454262	0.0291682	0.0401557	0.0321458	0.0183593	0.049982
cg00579393	0.838805	0.90424	0.905467	0.896014	0.933335	0.665581	0.900802	0.903257	0.877108	0.926215	0.771037	0.923023	0.745134	0.916516	0.894787	0.907063	0.639308	0.824687	0.884229	0.892331	0.8954	0.928425	0.883124	0.855501	0.6549	0.857711	0.659565	0.70683	0.921673	0.661652	0.894787	0.870724	0.900925	0.739609	0.914061	0.915166	0.896014	0.6425	0.834999	0.899206	0.925601	0.917376	0.65269	0.875389	0.916885	0.913202	0.854192	0.707321	0.773247
cg00579402	0.455775	0.578373	0.337621	0.477689	0.32318	0.296216	0.548279	0.255518	0.429721	0.313586	0.382661	0.614526	0.24855	0.499906	0.269051	0.359131	0.379126	0.485869	0.426994	0.410432	0.522729	0.256124	0.326815	0.713493	0.283492	0.403262	0.752474	0.718139	0.278745	0.214821	0.218153	0.387609	0.629977	0.336712	0.420026	0.557974	0.269051	0.577767	0.695316	0.364887	0.672089	0.475771	0.42861	0.232796	0.444061	0.391447	0.299683	0.309445	0.368119
cg00581156	0.0455396	0.024427	0.0267163	0.0346866	0.0293448	0.0225617	0.0245966	0.0245966	0.0351953	0.0337539	0.0218833	0.026038	0.0251901	0.029684	0.0268011	0.0259532	0.0273099	0.0261228	0.030871	0.0263772	0.0326516	0.0317189	0.0178982	0.0327364	0.0198484	0.029684	0.024427	0.0289209	0.0219681	0.0240879	0.0222225	0.0190853	0.0212898	0.0507118	0.0223921	0.0222225	0.0207811	0.0385869	0.0358736	0.028073	0.0309558	0.0270555	0.0237487	0.029684	0.0243422	0.0193397	0.0284687	0.0238335	0.0293448
cg00582628	0.231938	0.219645	0.0952858	0.137367	0.18546	0.125344	0.302731	0.228618	0.197214	0.272583	0.180076	0.303898	0.311883	0.145712	0.120499	0.359527	0.0949269	0.313319	0.0983365	0.20825	0.16249	0.366795	0.0835318	0.179448	0.158453	0.134586	0.109821	0.170655	0.0984262	0.0514997	0.0682784	0.177744	0.223145	0.121306	0.216595	0.216056	0.0685476	0.0735722	0.239206	0.287029	0.121486	0.217582	0.103182	0.0938502	0.145083	0.144545	0.0937904	0.160875	0.185011
cg00584022	0.0285613	0.0437139	0.0412699	0.0663613	0.029376	0.0404553	0.0376854	0.0344268	0.0601699	0.046891	0.0380113	0.041107	0.0360561	0.0353229	0.0265247	0.0377669	0.0307609	0.0337751	0.0459134	0.0385816	0.037604	0.0314126	0.0306794	0.0345083	0.0348341	0.0448544	0.0455876	0.0406997	0.0287242	0.0289686	0.0401294	0.0248953	0.0333678	0.0367078	0.028154	0.0474613	0.0337751	0.0569113	0.0406182	0.0385001	0.0428992	0.0407811	0.0332048	0.0452617	0.024651	0.0338566	0.0733673	0.0300277	0.0363005
cg00585790	0.440216	0.30774	0.582702	0.735944	0.359069	0.120846	0.465987	0.522215	0.417746	0.659909	0.541064	0.392082	0.381219	0.886098	0.156308	0.349911	0.600593	0.677587	0.219458	0.320412	0.420409	0.452889	0.381113	0.341072	0.748617	0.313278	0.462366	0.528604	0.490693	0.0824027	0.0793145	0.469608	0.459385	0.48079	0.31381	0.566729	0.48835	0.61646	0.645426	0.667896	0.309124	0.33234	0.520192	0.107428	0.40337	0.269403	0.688094	0.77343	0.613479
cg00585846	0.0502399	0.0274591	0.0273691	0.0380841	0.0321413	0.0375439	0.0239475	0.044207	0.0363733	0.0425863	0.0380841	0.0452876	0.0282695	0.0235873	0.0200756	0.0354729	0.0299803	0.0328617	0.033492	0.0218765	0.0350227	0.0305206	0.0279093	0.0345725	0.0300704	0.0289899	0.0468183	0.0337621	0.0295301	0.0279994	0.0285396	0.0284496	0.0249379	0.0408755	0.0447473	0.0258384	0.0273691	0.0336721	0.0417759	0.0358331	0.0253882	0.0285396	0.0305206	0.0281795	0.0245778	0.0279093	0.02923	0.0239475	0.027189
cg00586909	0.0251895	0.0549675	0.0553735	0.106131	0.0434624	0.0655251	0.0710746	0.0509068	0.0790605	0.0752706	0.0411613	0.0649837	0.0615998	0.0490119	0.0483351	0.0944909	0.0809555	0.0473876	0.182606	0.0890767	0.0620059	0.038725	0.05402	0.0752706	0.0598402	0.0653897	0.0927313	0.0660665	0.0545614	0.058622	0.0471169	0.0915131	0.0472523	0.0733756	0.0574038	0.0509068	0.0541553	0.0852868	0.0785191	0.0741878	0.0578099	0.0599756	0.0591634	0.097604	0.0579452	0.0556442	0.0778874	0.0904303	0.105184
cg00587613	0.792828	0.804012	0.528676	0.891139	0.505776	0.629331	0.861529	0.775786	0.836711	0.866748	0.741915	0.860144	0.873991	0.714008	0.610691	0.832877	0.771206	0.871647	0.798047	0.575968	0.624325	0.862168	0.805609	0.745643	0.867067	0.686635	0.817965	0.855883	0.55392	0.615058	0.607602	0.695475	0.656598	0.818178	0.687167	0.846297	0.43878	0.652125	0.83735	0.609946	0.912655	0.81871	0.73627	0.806781	0.886239	0.589602	0.835788	0.883577	0.844913
cg00592315	0.400157	0.923349	0.530697	0.917476	0.69905	0.904906	0.92407	0.911088	0.878633	0.926234	0.906658	0.921906	0.931488	0.924276	0.941276	0.90913	0.874203	0.89213	0.686995	0.904494	0.869876	0.782299	0.92644	0.851124	0.931797	0.704099	0.733256	0.813208	0.922834	0.913252	0.710177	0.92304	0.927882	0.877809	0.92304	0.511224	0.679371	0.79116	0.920155	0.908306	0.917682	0.898827	0.9149	0.916033	0.682668	0.915106	0.894946	0.904082	0.906246
cg00594118	0.165323	0.089341	0.0540736	0.0634692	0.0720477	0.0746349	0.0626522	0.0671457	0.0773583	0.0716392	0.0606096	0.100098	0.0614266	0.0833496	0.0794008	0.0743626	0.0806263	0.0759966	0.112489	0.0687797	0.0770859	0.0897495	0.0687797	0.0826688	0.0808986	0.102413	0.0701414	0.0947877	0.0671457	0.0663287	0.0497162	0.0538013	0.0514864	0.0738179	0.0789923	0.067418	0.0547544	0.0957409	0.0928814	0.0661925	0.0627883	0.0536651	0.0671457	0.0725924	0.0513502	0.0802178	0.0730463	0.0358271	0.123247
cg00594952	0.75303	0.791897	0.850137	0.854745	0.548892	0.804419	0.861833	0.933068	0.79296	0.896092	0.839741	0.655332	0.94819	0.896565	0.909441	0.846711	0.800757	0.708493	0.868448	0.806782	0.778547	0.816469	0.660648	0.782328	0.871874	0.785045	0.826983	0.801111	0.913931	0.842813	0.899164	0.761418	0.681322	0.876245	0.809381	0.803946	0.684984	0.45651	0.883806	0.845885	0.869393	0.76319	0.889358	0.631941	0.826392	0.843994	0.892706	0.879789	0.778784
cg00597076	0.0424987	0.599079	0.693545	0.709912	0.482974	0.396636	0.699257	0.659384	0.624233	0.794272	0.618741	0.567444	0.76747	0.801302	0.388288	0.702113	0.521309	0.805147	0.597981	0.590292	0.539324	0.745282	0.742096	0.662239	0.770765	0.669599	0.706507	0.722654	0.755717	0.768569	0.787681	0.631813	0.57041	0.699477	0.554153	0.647081	0.381807	0.582163	0.726718	0.706726	0.823271	0.514609	0.592379	0.693765	0.665864	0.613908	0.728732	0.745831	0.61951
cg00598858	0.0357888	0.0254245	0.0297571	0.0279731	0.0169292	0.0248298	0.0259342	0.0239803	0.0316261	0.0315411	0.0216866	0.0255094	0.0225361	0.0248298	0.0176938	0.0247449	0.0201574	0.0223662	0.0242351	0.0251696	0.026274	0.0350242	0.0216016	0.0266138	0.0235555	0.0240652	0.0236405	0.0309464	0.0204123	0.0234706	0.020922	0.0267837	0.0201574	0.0206671	0.0268687	0.026274	0.0238104	0.0292474	0.0289925	0.0217715	0.0384223	0.0323057	0.0194778	0.0273784	0.0205822	0.0207521	0.0338915	0.0180336	0.0283979
cg00600110	0.495282	0.803465	0.53174	0.566196	0.61692	0.538331	0.789532	0.615251	0.662555	0.778103	0.650708	0.948963	0.830996	0.510966	0.637276	0.804967	0.573704	0.533408	0.502957	0.715281	0.637443	0.420614	0.477178	0.687834	0.443723	0.493113	0.488274	0.701099	0.419195	0.521311	0.42929	0.578793	0.857359	0.489775	0.767591	0.713613	0.490276	0.521311	0.591975	0.741895	0.428873	0.814477	0.539665	0.492612	0.66731	0.69651	0.484853	0.630101	0.606908
cg00600684	0.893629	0.923443	0.937842	0.9414	0.947075	0.930812	0.945211	0.943433	0.924206	0.920225	0.944788	0.930812	0.953512	0.945211	0.954782	0.927424	0.81579	0.943178	0.914719	0.924714	0.916922	0.953342	0.941739	0.933099	0.929965	0.938351	0.918531	0.943094	0.954782	0.898711	0.939282	0.944195	0.916244	0.91726	0.823328	0.929881	0.91743	0.908197	0.926916	0.939198	0.953512	0.956053	0.940129	0.918616	0.921749	0.950378	0.930812	0.939875	0.949023
cg00601486	0.941556	0.902896	0.920112	0.839286	0.936195	0.642272	0.961247	0.954237	0.863513	0.967536	0.939597	0.866606	0.914545	0.946608	0.675056	0.953927	0.844338	0.964649	0.547219	0.920009	0.891452	0.920112	0.909391	0.918154	0.947329	0.509795	0.771244	0.734026	0.954855	0.92836	0.557219	0.782481	0.930422	0.690417	0.929597	0.888462	0.816811	0.80743	0.553507	0.913617	0.958154	0.951144	0.85341	0.880112	0.773305	0.917535	0.898394	0.855163	0.88238
cg00602891	0.0377521	0.0412082	0.0384611	0.0588431	0.0327895	0.0450188	0.0353595	0.0581342	0.064426	0.0537033	0.0311058	0.0459936	0.0436009	0.133991	0.0430692	0.0499814	0.0541464	0.0521082	0.0568049	0.0526399	0.033144	0.054944	0.0397017	0.0405879	0.0436895	0.047057	0.0516651	0.0511334	0.0362456	0.0467911	0.0419172	0.0599952	0.0423602	0.0618561	0.0395245	0.0420058	0.0375749	0.0355367	0.0445757	0.0390814	0.0504245	0.03917	0.0502472	0.0504245	0.0432464	0.0422716	0.050838	0.0596407	0.0472342
cg00605270	0.0415335	0.0589257	0.030179	0.0572135	0.0360365	0.0389201	0.026304	0.0472107	0.0387399	0.0302691	0.0386498	0.070911	0.048202	0.0216181	0.0290075	0.0298185	0.0365772	0.0306296	0.0272052	0.0516264	0.0538792	0.032522	0.0316208	0.0428852	0.035676	0.0362167	0.0151298	0.0417137	0.0389201	0.035676	0.0163914	0.0287371	0.063882	0.0357661	0.0332429	0.0304493	0.0265744	0.0396411	0.0598268	0.0469404	0.0377486	0.0666756	0.02315	0.0395509	0.0190948	0.0416236	0.0316208	0.019185	0.0465799
cg00609097	0.110221	0.02799	0.033211	0.0249716	0.0187717	0.0271743	0.0266032	0.0219533	0.0312532	0.0275821	0.0285611	0.0302742	0.0257874	0.0335374	0.0212191	0.0288058	0.0277453	0.0224427	0.0277453	0.0354952	0.0226875	0.0209743	0.020077	0.0317426	0.0218717	0.030519	0.0235032	0.0306005	0.0207296	0.0212191	0.0263585	0.0223611	0.0217085	0.0292953	0.0321505	0.0208927	0.0250532	0.025869	0.0283979	0.0255427	0.0279085	0.0220348	0.0313347	0.0345979	0.0208927	0.0183638	0.023748	0.0229322	0.0343531
cg00611397	0.894363	0.944981	0.887577	0.936636	0.879416	0.93416	0.928567	0.92765	0.925724	0.947548	0.9282	0.917196	0.943055	0.939387	0.921322	0.928383	0.904174	0.905183	0.92068	0.951583	0.933243	0.907201	0.924807	0.938378	0.914078	0.924807	0.920038	0.938929	0.944889	0.926366	0.939387	0.91417	0.941038	0.884276	0.949566	0.93902	0.929575	0.922056	0.946448	0.90931	0.924807	0.940029	0.907109	0.908026	0.930859	0.942322	0.914261	0.907292	0.928016
cg00612467	0.136075	0.063383	0.0704897	0.0493726	0.0654135	0.0598296	0.0557686	0.0487634	0.061454	0.0928252	0.0462253	0.041149	0.0338393	0.0783071	0.0483573	0.0455146	0.0484588	0.0351591	0.0566823	0.0971907	0.0516061	0.0414536	0.0381033	0.0523168	0.0522152	0.0721141	0.038814	0.0438902	0.0319103	0.0435856	0.0558701	0.0444994	0.0477482	0.0527229	0.0501848	0.0423673	0.0424689	0.0622662	0.063383	0.0477482	0.0637891	0.0532305	0.0353621	0.0440933	0.0334332	0.0496771	0.0557686	0.0576976	0.0434841
cg00613255	0.720549	0.609059	0.47835	0.502399	0.406404	0.336572	0.823184	0.569917	0.710889	0.498676	0.718134	0.699318	0.346936	0.839787	0.48972	0.602015	0.341503	0.426931	0.427736	0.653433	0.596078	0.66581	0.668024	0.547578	0.826404	0.344622	0.474224	0.489418	0.474727	0.931052	0.440314	0.505115	0.69811	0.496864	0.587324	0.595676	0.267344	0.351967	0.706059	0.478853	0.69328	0.749327	0.352772	0.480865	0.674766	0.600808	0.418479	0.626467	0.527957
cg00615377	0.0488022	0.083934	0.0747764	0.142876	0.0468874	0.0542135	0.0646198	0.0678666	0.105413	0.0648696	0.0607903	0.264006	0.0636208	0.059708	0.0480529	0.0442234	0.034483	0.0503839	0.0522987	0.0706139	0.11199	0.0418091	0.0716129	0.0726951	0.0652858	0.0698646	0.0695316	0.0738607	0.0313195	0.0536307	0.0416426	0.0876803	0.0825187	0.0614563	0.0785227	0.0786892	0.0519657	0.0673671	0.0845168	0.0512164	0.055379	0.145373	0.0501342	0.0458884	0.055712	0.11174	0.0918983	0.0389786	0.121147
cg00615915	0.0625231	0.0936779	0.038786	0.0673447	0.0454621	0.0552907	0.0538071	0.0671592	0.0706827	0.0892272	0.0610395	0.0818094	0.0376734	0.0641921	0.0560325	0.0443494	0.0597414	0.0519527	0.042495	0.0920089	0.0768024	0.0758751	0.0345208	0.0619667	0.0690137	0.0615958	0.0478729	0.0775442	0.054178	0.054178	0.0513963	0.042495	0.0439785	0.0510255	0.0428658	0.054178	0.0883	0.0593705	0.0858892	0.0647484	0.0565888	0.104434	0.0413823	0.074577	0.0513963	0.0653048	0.0493564	0.049171	0.067901
cg00616129	0.0159993	0.0464704	0.0270245	0.059145	0.0379628	0.0186905	0.0379628	0.027719	0.0450814	0.0354453	0.0502033	0.0413485	0.0319728	0.0513319	0.0219894	0.023552	0.0272849	0.0205136	0.0262432	0.0314519	0.0525473	0.0234652	0.0325805	0.0319728	0.0322332	0.0325805	0.0255487	0.0326673	0.027719	0.0230311	0.050377	0.0403936	0.0712987	0.0302365	0.0272849	0.044821	0.0382233	0.0422166	0.0409144	0.0273717	0.0276322	0.0416089	0.0238992	0.0212949	0.0271113	0.0374419	0.025867	0.0223366	0.035098
cg00616369	0.0164908	0.0125227	0.017229	0.0156602	0.01363	0.0133532	0.0108616	0.0138146	0.0167676	0.0147374	0.0138146	0.0118767	0.0109539	0.0127072	0.0109539	0.0130764	0.0135378	0.0115999	0.0127995	0.0135378	0.0148297	0.0120613	0.0116921	0.0144606	0.0102156	0.0159371	0.0134455	0.0140914	0.0104002	0.0108616	0.0117844	0.00975423	0.0104002	0.017229	0.0127995	0.0117844	0.0128918	0.017229	0.0145529	0.0139992	0.0139992	0.014276	0.0134455	0.0180595	0.00956967	0.0128918	0.0181826	0.011969	0.0150143
cg00617305	0.0434021	0.0462014	0.0348044	0.0698951	0.0259068	0.559665	0.0230075	0.0434021	0.0448017	0.113584	0.0331048	0.0769932	0.246048	0.0210081	0.0159094	0.0255069	0.0191086	0.0328049	0.0433021	0.0521998	0.0381035	0.0320051	0.686432	0.0355042	0.025107	0.0350043	0.0618972	0.0378036	0.0299057	0.0301056	0.0239073	0.0494005	0.0293059	0.0412027	0.489184	0.0383035	0.0331048	0.0276063	0.055299	0.0236074	0.028906	0.0491006	0.0231075	0.024907	0.0349044	0.16477	0.0593979	0.0194085	0.0350043
cg00618396	0.0870844	0.0416932	0.374781	0.44857	0.028646	0.640441	0.55832	0.325662	0.489356	0.035663	0.0330316	0.0456403	0.367655	0.0317159	0.425655	0.0345666	0.282354	0.0316063	0.0346762	0.038404	0.0419125	0.0314966	0.0392811	0.0423511	0.549768	0.438044	0.0320448	0.0380751	0.0427896	0.172494	0.436838	0.479927	0.431027	0.350551	0.530581	0.508872	0.364146	0.0483813	0.392214	0.331693	0.0376365	0.0347859	0.378728	0.0388426	0.385197	0.495276	0.487053	0.447473	0.288714
cg00619207	0.548099	0.452605	0.37617	0.538271	0.311547	0.287227	0.523084	0.317106	0.499557	0.406247	0.354033	0.517227	0.556437	0.431163	0.313533	0.552466	0.41935	0.776609	0.490624	0.411409	0.338349	0.535889	0.526062	0.440891	0.554551	0.377361	0.450321	0.594357	0.655405	0.238984	0.199972	0.424512	0.454788	0.55743	0.568547	0.520602	0.511271	0.622945	0.402674	0.396519	0.694417	0.460248	0.363067	0.266679	0.441785	0.321276	0.280146	0.431858	0.696898
cg00620223	0.0697345	0.0495982	0.0505885	0.0571906	0.0541371	0.0439864	0.0560352	0.0402728	0.0443165	0.0658558	0.052239	0.0580158	0.0484428	0.0925117	0.0547148	0.0546323	0.0566954	0.0295444	0.045967	0.0434087	0.100269	0.0519914	0.0368892	0.101755	0.0320202	0.074521	0.0512487	0.0626373	0.0487729	0.0354863	0.0595013	0.0467923	0.0310299	0.0385397	0.029957	0.0647004	0.0421709	0.066516	0.0681665	0.0486079	0.0350736	0.0510011	0.0533944	0.0354863	0.0274812	0.0805454	0.047315	0.0596663	0.0481127
cg00620629	0.0266471	0.013324	0.0217663	0.0174133	0.0154346	0.0134559	0.0164899	0.0153027	0.0258556	0.020843	0.0143793	0.011873	0.0211068	0.0180728	0.0143793	0.01926	0.014907	0.0137197	0.0215025	0.0186005	0.0189962	0.0141155	0.0187324	0.0221621	0.0191281	0.0221621	0.0164899	0.0203153	0.0110815	0.0200515	0.0279662	0.0250641	0.014775	0.0204472	0.0350894	0.0151708	0.0160942	0.0246684	0.0159622	0.0186005	0.0156984	0.0120049	0.0179409	0.0203153	0.0134559	0.0153027	0.0250202	0.0207111	0.017809
cg00622552	0.0405667	0.147963	0.152974	0.148847	0.116324	0.135386	0.119272	0.0656226	0.0906785	0.0732867	0.10355	0.291125	0.0621836	0.0179673	0.0613975	0.104729	0.049803	0.0722059	0.0465605	0.139316	0.158673	0.037226	0.130375	0.0906785	0.0743676	0.141969	0.138334	0.0849795	0.0447918	0.0169848	0.0459709	0.106596	0.127231	0.0834073	0.159066	0.190018	0.070732	0.0894994	0.130178	0.0806561	0.0360469	0.172036	0.0938227	0.0758415	0.0489187	0.146784	0.0721731	0.0475431	0.12389
cg00622677	0.0454983	0.0434313	0.0429615	0.0451224	0.0277412	0.0267077	0.0378881	0.0376062	0.0390155	0.0443708	0.0268017	0.0428676	0.061846	0.0283989	0.0260501	0.0367607	0.028211	0.0314054	0.0323449	0.0275533	0.0399551	0.0296203	0.0884346	0.0382639	0.0367607	0.0442769	0.030184	0.0365728	0.0345058	0.0355393	0.0220101	0.0485987	0.0199431	0.0356332	0.0288686	0.0294324	0.0429615	0.0353514	0.0591214	0.0330026	0.0396732	0.0375123	0.0375123	0.0416462	0.0250166	0.0275533	0.0459054	0.0452164	0.0603428
cg00623593	0.634403	0.769933	0.86299	0.826929	0.778948	0.847564	0.816311	0.557573	0.698512	0.861287	0.791369	0.829534	0.865595	0.886229	0.686692	0.690298	0.611364	0.87481	0.623585	0.867498	0.647926	0.886129	0.742286	0.506487	0.616673	0.702619	0.667459	0.901555	0.399105	0.83344	0.611364	0.805593	0.850569	0.732069	0.683587	0.857681	0.600546	0.530828	0.641315	0.694405	0.771736	0.85127	0.668461	0.805593	0.678678	0.777546	0.635906	0.718345	0.831938
cg00625425	0.727043	0.681509	0.28726	0.636201	0.805374	0.818674	0.633721	0.811122	0.557757	0.754543	0.599233	0.679706	0.856769	0.883368	0.534539	0.655587	0.257618	0.417324	0.306533	0.740793	0.750261	0.23023	0.46838	0.456433	0.652543	0.820026	0.321072	0.467253	0.889341	0.611518	0.771224	0.627973	0.750824	0.185147	0.812024	0.716223	0.525297	0.301235	0.55663	0.771224	0.818336	0.585595	0.83186	0.415633	0.740004	0.677564	0.149381	0.576241	0.543218
cg00625653	-0.00654603	0.546662	0.615941	0.4861	0.585716	0.552775	0.338827	0.0688452	0.402898	0.739555	0.2657	0.382296	0.735706	0.0271876	0.714878	0.0448468	0.0476768	0.607564	0.457574	0.53738	0.108126	0.572585	0.720877	0.515646	0.0502804	0.699369	0.615262	0.225061	0.0484692	0.437424	0.789477	0.0923908	0.353204	0.401766	0.641637	0.400748	0.0507332	0.504212	0.533531	0.570887	0.932675	0.320262	0.13835	0.085146	0.0616004	0.549492	0.204874	0.0479032	0.565227
cg00626119	0.77423	0.692029	0.599101	0.67945	0.629817	0.746537	0.751998	0.775791	0.70607	0.70373	0.754533	0.614215	0.879737	0.818793	0.752486	0.808847	0.744002	0.780959	0.70412	0.671259	0.653707	0.786517	0.741662	0.753168	0.81265	0.735714	0.641811	0.768477	0.787979	0.802216	0.683545	0.709678	0.650489	0.778813	0.732788	0.711531	0.677305	0.744782	0.738151	0.673209	0.810504	0.746927	0.72723	0.616751	0.702755	0.671454	0.792595	0.798413	0.762822
cg00626466	0.102363	0.333391	0.236962	0.38891	0.27851	0.329555	0.326451	0.212672	0.329464	0.212124	0.373843	0.481048	0.0931401	0.100263	0.127475	0.198335	0.207923	0.142998	0.148751	0.393933	0.412104	0.157517	0.201623	0.238605	0.16948	0.193678	0.235135	0.239427	0.071407	0.103641	0.0842825	0.278419	0.526157	0.121722	0.353845	0.417401	0.223082	0.209841	0.378592	0.268648	0.0948751	0.556565	0.181625	0.101632	0.203358	0.295769	0.181503	0.212672	0.276684
cg00629217	0.671517	0.928124	0.928522	0.933783	0.699113	0.833522	0.911646	0.911646	0.926834	0.914624	0.930705	0.886035	0.931897	0.888517	0.921176	0.937059	0.922565	0.885439	0.912539	0.931599	0.931797	0.90976	0.936264	0.912341	0.937456	0.916411	0.941327	0.905293	0.950559	0.9043	0.927033	0.868365	0.920481	0.917106	0.903605	0.913433	0.936959	0.9314	0.915418	0.902712	0.926933	0.929713	0.922268	0.915617	0.918793	0.931103	0.921474	0.932095	0.922863
cg00629585	0.458661	0.380862	0.688301	0.584569	0.377105	0.107145	0.68097	0.726238	0.613709	0.734394	0.683261	0.21555	0.489359	0.631578	0.0727812	0.197498	0.480012	0.74539	0.235069	0.582828	0.512635	0.594832	0.665942	0.454354	0.739434	0.733294	0.672356	0.418799	0.13042	0.660444	0.745573	0.289042	0.433369	0.623972	0.191175	0.567066	0.153696	0.243957	0.642116	0.739251	0.780578	0.477904	0.475155	0.693341	0.658428	0.316167	0.163654	0.750522	0.674739
cg00630164	0.0641745	0.0327386	0.0319527	0.0291038	0.0234061	0.0286126	0.0272373	0.0385346	0.0403029	0.0229149	0.027925	0.0282197	0.0236025	0.0538596	0.0334263	0.0276303	0.0305774	0.0371593	0.0397134	0.0267461	0.0331315	0.0266479	0.0246831	0.0410888	0.0286126	0.0346051	0.0343104	0.0378469	0.0248796	0.0286126	0.0251743	0.0343104	0.0293985	0.0335245	0.0288091	0.0309703	0.0233078	0.0358822	0.0285144	0.0335245	0.0326404	0.0252726	0.0334263	0.0336227	0.0267461	0.025469	0.0347688	0.0462954	0.0413835
cg00630249	0.0193253	0.0433148	0.0374398	0.0554727	0.036787	0.0341759	0.0409485	0.0474762	0.0522088	0.046497	0.0369502	0.0364606	0.0402957	0.0411116	0.0189173	0.036379	0.0395613	0.0537592	0.042662	0.0416828	0.038011	0.0336047	0.0367054	0.0455995	0.0364606	0.0324624	0.0294433	0.0557991	0.0238131	0.0357263	0.0332784	0.0686914	0.0460891	0.032952	0.0402141	0.0318096	0.0368686	0.0560439	0.042254	0.038419	0.0452731	0.0381742	0.0327888	0.0522904	0.0450283	0.0382558	0.0415468	0.0459259	0.0331152
cg00630583	0.0248301	0.0197685	0.0249748	0.0154299	0.0135499	0.0158638	0.0102236	0.0181777	0.0277225	0.0134052	0.0125375	0.0174546	0.0125375	0.0187561	0.0136945	0.0160084	0.0119591	0.0118144	0.0160084	0.0135499	0.0225162	0.0118144	0.0115252	0.0206362	0.0118144	0.0258425	0.0158638	0.01731	0.00950053	0.0103682	0.010079	0.00762049	0.0113806	0.0220824	0.0154299	0.0154299	0.0121037	0.0239624	0.0170207	0.0190454	0.0160084	0.0162976	0.0121037	0.0206362	0.00877744	0.0136945	0.0209254	0.0129714	0.023384
cg00631230	0.229195	0.0300875	0.0365493	0.0338784	0.0236258	0.0238843	0.0210411	0.0231089	0.030346	0.0317245	0.030346	0.0243151	0.0324138	0.0242289	0.0187149	0.0230227	0.0313799	0.0271582	0.0268998	0.0237981	0.0284506	0.0307768	0.024832	0.0268136	0.0246597	0.0333615	0.0312076	0.0341369	0.0246597	0.0182841	0.0281921	0.0195765	0.0258659	0.0333615	0.0282783	0.029226	0.0219027	0.0277613	0.0324999	0.0263828	0.0287952	0.0275028	0.0281921	0.0310353	0.0191457	0.0241427	0.0349123	0.0249182	0.0250043
cg00633969	0.643082	0.873766	0.712338	0.964518	0.762328	0.492402	0.955088	0.837668	0.91828	0.917773	0.95377	0.90084	0.305422	0.954074	0.525763	0.839391	0.582547	0.61611	0.737282	0.941298	0.695506	0.863322	0.820328	0.883602	0.675124	0.47699	0.543305	0.807146	0.962997	0.332698	0.363017	0.827629	0.934403	0.850647	0.554763	0.940791	0.756954	0.892221	0.683946	0.868899	0.875388	0.807045	0.586602	0.404692	0.890598	0.80816	0.904625	0.935214	0.839493
cg00635481	0.0388042	0.0181457	0.0207483	0.0948426	0.024571	0.0227003	0.0174137	0.018227	0.029451	0.0372589	0.0166817	0.0242456	0.016519	0.021155	0.0139164	0.0220497	0.0148924	0.022375	0.0180643	0.0218057	0.0298576	0.0225377	0.0232697	0.0266856	0.024571	0.0247336	0.0258723	0.024083	0.0168444	0.0191217	0.0285563	0.0266043	0.016519	0.0207483	0.0280683	0.019447	0.021643	0.023839	0.0283123	0.0251403	0.025059	0.0229443	0.0215617	0.020179	0.0215617	0.022131	0.0452566	0.0210737	0.0268483
cg00636639	0.0268859	0.0252829	0.0223598	0.0264144	0.0263201	0.0213226	0.0223598	0.0250943	0.0338635	0.0325434	0.0207568	0.0300918	0.020474	0.0307519	0.028206	0.0234913	0.0337693	0.0232085	0.0239628	0.0256601	0.033675	0.0251886	0.0244343	0.030469	0.0216998	0.032072	0.0279231	0.0281117	0.0160422	0.019531	0.0189653	0.0284889	0.0229256	0.028866	0.0234913	0.0186824	0.023397	0.0287717	0.0331092	0.0234913	0.0312233	0.0253772	0.0213226	0.0259429	0.0224541	0.0291489	0.0316319	0.028206	0.0289603
cg00638514	0.552858	0.308322	0.579346	0.54069	0.704037	0.740647	0.46467	0.569117	0.54812	0.77532	0.534768	0.227671	0.722234	0.144221	0.745493	0.565348	0.489112	0.791363	0.48922	0.320059	0.242854	0.596467	0.765198	0.383911	0.503972	0.678517	0.58936	0.299169	0.783503	0.793732	0.558995	0.555873	0.321674	0.532291	0.663658	0.521308	0.382081	0.482329	0.646752	0.639646	0.878259	0.368191	0.681317	0.205813	0.42709	0.531214	0.665488	0.764767	0.462947
cg00642303	0.0318457	0.0546753	0.0477344	0.0615325	0.0564314	0.037365	0.0519993	0.0466473	0.0541735	0.0472327	0.0409608	0.0516648	0.0489052	0.0543408	0.0376995	0.0419643	0.0473163	0.0548425	0.0453929	0.0534209	0.0548425	0.0465637	0.0458947	0.056515	0.0515812	0.0576858	0.0452257	0.0571004	0.0703967	0.0448912	0.0446403	0.0417135	0.0375322	0.0453929	0.0426333	0.0421316	0.0476508	0.0609471	0.0606126	0.0470654	0.05317	0.0371141	0.0357761	0.0548425	0.0513303	0.0521666	0.0498251	0.0356089	0.0544244
cg00644033	0.842121	0.852973	0.565943	0.519513	0.804408	0.890864	0.904651	0.902338	0.681662	0.913012	0.900025	0.81099	0.901538	0.983635	0.553312	0.844523	0.687532	0.918704	0.654089	0.816238	0.828779	0.887484	0.747482	0.509906	0.900559	0.666719	0.528941	0.832159	0.939696	0.891398	0.613974	0.837051	0.847369	0.810101	0.91399	0.746326	0.891487	0.775234	0.659159	0.881703	0.919683	0.859199	0.591292	0.863557	0.911322	0.85404	0.762781	0.842299	0.888907
cg00645579	0.767683	0.758971	0.692019	0.816918	0.548423	0.647775	0.841878	0.765627	0.753196	0.562225	0.710519	0.67254	0.820246	0.966778	0.469431	0.730585	0.736262	0.855093	0.752413	0.786378	0.625458	0.753881	0.763865	0.779527	0.835908	0.74654	0.747812	0.836103	0.856169	0.815646	0.525029	0.772675	0.737437	0.768368	0.491553	0.70582	0.614005	0.832677	0.778352	0.774437	0.880053	0.734598	0.787455	0.756426	0.799788	0.797341	0.781778	0.868894	0.794209
cg00645922	0.0319716	0.0392611	0.058557	0.03165	0.030578	0.0473011	0.0157845	0.0290772	0.0336868	0.0325076	0.0239316	0.0260756	0.0301492	0.0419411	0.0162133	0.0339012	0.0162133	0.0212517	0.030042	0.0216805	0.0436563	0.0440851	0.0191077	0.056949	0.0415123	0.0520178	0.0253252	0.0464435	0.0244676	0.0301492	0.027898	0.0718497	0.0176069	0.0267188	0.0297204	0.035402	0.0174997	0.0263972	0.0288628	0.0297204	0.0245748	0.025754	0.0166421	0.0358308	0.0194293	0.0280052	0.0444424	0.0282196	0.0460147
cg00646140	0.0291583	0.0879055	0.0960821	0.152252	0.0592873	0.0545769	0.0893275	0.0976818	0.0761738	0.0575098	0.0675528	0.1239	0.0508441	0.0564433	0.0561767	0.0561767	0.0415121	0.0260476	0.0494221	0.0506663	0.0834617	0.0431119	0.0549324	0.068886	0.0678194	0.0703969	0.0378682	0.0580431	0.0369794	0.0496887	0.0404456	0.0964376	0.139454	0.065242	0.128789	0.124611	0.0634645	0.0327134	0.10097	0.0791067	0.0403567	0.119457	0.0590207	0.0487111	0.0751073	0.153141	0.0455411	0.0380459	0.0790178
cg00646492	0.0834211	0.0749369	0.0435779	0.0851394	0.0604387	0.192748	0.118754	0.0589352	0.0901869	0.0822397	0.0552838	0.0783735	0.187486	0.0407856	0.163859	0.0722521	0.0590426	0.0594722	0.0624792	0.0681711	0.062157	0.0610831	0.065701	0.0570021	0.0753665	0.0848172	0.111666	0.0670972	0.0565725	0.0786957	0.191352	0.0672046	0.0486254	0.0672046	0.0805214	0.0567873	0.0607609	0.0834211	0.0820249	0.0565725	0.114243	0.0554986	0.0504511	0.063231	0.0628014	0.0595796	0.0918336	0.0581835	0.0532433
cg00648153	0.0682118	0.0426286	0.0388416	0.0472571	0.0361486	0.0241144	0.039599	0.0314359	0.049361	0.0517174	0.0372426	0.059628	0.0215056	0.0161196	0.0333715	0.0404405	0.0273965	0.0188968	0.0297528	0.0384208	0.0516332	0.0295003	0.0303419	0.0882408	0.0390099	0.0499501	0.0242827	0.0719988	0.0430494	0.0438068	0.0276489	0.0229362	0.0355595	0.0236095	0.0337923	0.0451532	0.0548311	0.0603854	0.0766273	0.0215897	0.0223471	0.085632	0.0345497	0.0288271	0.0374109	0.0563459	0.0390099	0.0227679	0.0348021
cg00648883	0.31973	0.367965	0.099318	0.2228	0.147278	0.155546	0.385054	0.460485	0.328918	0.257254	0.454237	0.406002	0.0409764	0.602342	0.181915	0.196523	0.30163	0.436138	0.323956	0.254222	0.301538	0.42254	0.219676	0.316147	0.71581	0.213337	0.0746032	0.314034	0.578271	0.0675287	0.0321563	0.310726	0.428971	0.248342	0.192113	0.313758	0.134691	0.430074	0.429155	0.442936	0.43724	0.349865	0.400306	0.0689069	0.230977	0.281326	0.326774	0.372559	0.427593
cg00650762	0.0228128	0.013438	0.0162078	0.0162078	0.0142902	0.013438	0.0119465	0.0190841	0.0244107	0.0148229	0.0131184	0.0261152	0.0150359	0.0238781	0.0131184	0.0131184	0.0180188	0.0162078	0.0153555	0.0145033	0.0166339	0.0135445	0.0133314	0.0185515	0.0147163	0.0212148	0.0149294	0.0178058	0.0142902	0.0130118	0.0107747	0.0206821	0.0130118	0.0191907	0.0174862	0.0114139	0.0148229	0.0185515	0.0150359	0.0154621	0.0200429	0.028672	0.013651	0.0155686	0.0120531	0.0146098	0.0210727	0.0178058	0.0175927
cg00650876	0.0339892	0.0294994	0.0678672	0.0260708	0.0163564	0.0220708	0.0190503	0.0393771	0.0322749	0.0281933	0.0192136	0.0276218	0.0161115	0.0216626	0.0167646	0.0256626	0.0248463	0.0200299	0.0248463	0.0265606	0.0326015	0.0213361	0.0214993	0.0983165	0.0276218	0.0463975	0.0257443	0.0367648	0.0184789	0.0184789	0.0288463	0.0201932	0.0207646	0.0200299	0.0223973	0.0245198	0.023132	0.0314586	0.0230504	0.0189687	0.0226422	0.0288463	0.0263973	0.0204381	0.025581	0.0218259	0.0304518	0.0213361	0.0292545
cg00651216	0.0310568	0.116754	0.0483633	0.0959859	0.0346375	0.190993	0.114963	0.0537343	0.110905	0.0762924	0.0910924	0.174999	0.0604182	0.0848859	0.0481246	0.15256	0.0438278	0.103863	0.0803504	0.0823795	0.188367	0.0614924	0.133344	0.0829763	0.268454	0.0742633	0.144205	0.207344	0.0312955	0.114605	0.17667	0.0543311	0.0893021	0.0993279	0.215102	0.0797537	0.02306	0.155305	0.0727117	0.0564794	0.0705633	0.0908537	0.0509891	0.0765311	0.059702	0.104699	0.065073	0.0540923	0.0787988
cg00653387	0.350083	0.318586	0.363117	0.360945	0.21027	0.4192	0.456918	0.655975	0.332607	0.773178	0.384444	0.225475	0.828373	0.131674	0.432234	0.608285	0.579157	0.618652	0.054855	0.346035	0.0660125	0.103336	0.688362	0.624675	0.756689	0.466792	0.427297	0.189139	0.761724	0.59614	0.0334287	0.416633	0.193385	0.506781	0.427988	0.399848	0.651828	0.332508	0.129896	0.509645	0.844072	0.387801	0.267538	0.134142	0.46778	0.475679	0.772981	0.708109	0.60789
cg00654814	0.0574411	0.526856	0.606709	0.672572	0.571071	0.6691	0.435261	0.363781	0.297408	0.726386	0.531962	0.315073	0.762943	0.831256	0.746911	0.580772	0.148424	0.665731	0.673287	0.563005	0.0845011	0.784591	0.715868	0.602114	0.50674	0.699428	0.657868	0.057339	0.0757194	0.742928	0.781221	0.431789	0.435363	0.730164	0.561983	0.540744	0.0971632	0.581793	0.60579	0.69034	0.337028	0.488666	0.451905	0.682171	0.0469234	0.567804	0.625464	0.31783	0.505413
cg00655307	0.53773	0.286479	0.247639	0.421612	0.628257	0.319555	0.468343	0.530043	0.423231	0.701589	0.38611	0.14548	0.713828	0.338166	0.65678	0.329164	0.423534	0.655364	0.335637	0.282231	0.0806441	0.629066	0.518613	0.502935	0.475423	0.549969	0.267868	0.169452	0.42495	0.664164	0.317936	0.307417	0.193221	0.420095	0.43729	0.259675	0.345448	0.286176	0.289716	0.520434	0.830451	0.282737	0.380344	0.559173	0.34909	0.417971	0.71049	0.560791	0.61794
cg00657095	0.0277957	0.0525511	0.0349509	0.0501661	0.0267265	0.0351976	0.0346219	0.0288649	0.0458894	0.0294406	0.0346219	0.0671906	0.0430108	0.0208049	0.0311677	0.0349509	0.0388986	0.0296873	0.0356089	0.0419417	0.0490969	0.0282891	0.0314967	0.0436688	0.033964	0.0518109	0.0423529	0.054196	0.0360201	0.0312499	0.0271377	0.034293	0.0395566	0.0327303	0.0605288	0.0462183	0.0318256	0.0478632	0.0455604	0.0294406	0.0353621	0.0570746	0.041037	0.0384052	0.0318256	0.034293	0.0277408	0.0252461	0.036678
cg00657582	0.0336305	0.107977	0.022489	0.186176	0.0316521	0.495431	0.0950651	0.0863185	0.119014	0.492099	0.107977	0.138069	0.512091	0.0465422	0.122659	0.124533	0.0547682	0.164309	0.0309233	0.175138	0.233137	0.0626818	0.21481	0.198671	0.107248	0.174513	0.26198	0.172119	0.394949	0.203877	0.219704	0.0691376	0.0739274	0.0436267	0.387348	0.200441	0.0781966	0.155667	0.1136	0.0868391	0.301131	0.164413	0.0260293	0.071949	0.198462	0.131926	0.26073	0.187529	0.230846
cg00658007	0.581648	0.531233	0.416692	0.230537	0.641977	0.485459	0.495479	0.752405	0.455611	0.526276	0.597047	0.37577	0.235072	0.810414	0.49801	0.257853	0.445802	0.775081	0.251736	0.498432	0.156391	0.613711	0.258803	0.378723	0.549058	0.276416	0.198684	0.440001	0.464048	0.746077	0.290127	0.327359	0.54062	0.417747	0.132976	0.378828	0.355519	0.451181	0.422598	0.641555	0.773499	0.23813	0.223575	0.42186	0.657165	0.453923	0.289706	0.595254	0.401821
cg00658626	0.0286807	0.031897	0.0397232	0.205575	0.026751	0.399087	0.0244996	0.0303961	0.0338267	0.546392	0.0266438	0.0523739	0.737974	0.0382223	0.299061	0.0297528	0.0322186	0.024714	0.463841	0.290806	0.02986	0.0375791	0.518946	0.0299672	0.151006	0.531382	0.168374	0.0288951	0.0271798	0.0205329	0.549286	0.0348988	0.066311	0.264754	0.442506	0.0346844	0.0260005	0.196784	0.0652389	0.0650245	0.513157	0.0296456	0.134496	0.0325402	0.0232131	0.222192	0.0298958	0.0284663	0.150255
cg00659129	0.915556	0.926942	0.720566	0.554448	0.723209	0.874992	0.78197	0.920334	0.853541	0.763468	0.903966	0.859235	0.942395	0.929789	0.495585	0.919724	0.945343	0.720566	0.90966	0.928976	0.894308	0.816638	0.85466	0.905288	0.892885	0.930297	0.884447	0.913218	0.957136	0.8021	0.893902	0.864928	0.877737	0.911184	0.910269	0.791933	0.917996	0.932432	0.70308	0.874586	0.591149	0.791933	0.926536	0.938329	0.94636	0.921554	0.939989	0.925621	0.90295
cg00659953	0.0217984	0.0309877	0.0286697	0.035127	0.0207222	0.0279246	0.0272623	0.0227091	0.0375278	0.0484556	0.0295803	0.0486212	0.0217156	0.0302426	0.0217156	0.0367	0.033968	0.0303254	0.0261861	0.0333885	0.0317328	0.0307393	0.0251099	0.0319811	0.0276763	0.0261861	0.0333057	0.0328918	0.0151755	0.0232886	0.0275107	0.014596	0.0270967	0.0370311	0.0342992	0.0228746	0.0337197	0.0503597	0.0352098	0.0255238	0.024282	0.0367	0.0237853	0.0490351	0.0229574	0.0229574	0.0297459	0.0173279	0.0229574
cg00660989	0.503994	0.163882	0.121002	0.145475	0.0787498	0.667043	0.464252	0.755313	0.2943	0.165974	0.420116	0.351718	0.812625	0.04842	0.654597	0.400873	0.568209	0.837935	0.293464	0.219313	0.545828	0.85446	0.57438	0.0779131	0.821724	0.362072	0.696117	0.600317	0.285097	0.399932	0.883639	0.680116	0.314067	0.0554272	0.670598	0.332474	0.203416	0.105628	0.367719	0.36364	0.46467	0.398886	0.191493	0.359143	0.700301	0.660977	0.0659904	0.740252	0.157293
cg00661202	0.0243224	0.0387182	0.0392146	0.0269699	0.037229	0.0213439	0.0253152	0.0335059	0.0284591	0.030362	0.019441	0.0436823	0.0268044	0.0281282	0.0248188	0.0258943	0.0229159	0.0267217	0.033175	0.0342505	0.0392973	0.0230813	0.0307757	0.0418621	0.0346642	0.0507147	0.0216748	0.0289555	0.0177863	0.0321822	0.0201856	0.0225022	0.0209302	0.0307757	0.0297828	0.0221713	0.023495	0.0359052	0.0377254	0.0334232	0.0255634	0.0304447	0.0229159	0.0345815	0.0234123	0.0289555	0.0299759	0.0216748	0.0267217
cg00661485	0.19647	0.724585	0.58963	0.678521	0.730391	0.630459	0.699745	0.853545	0.722301	0.87296	0.582206	0.452961	0.812144	0.901226	0.862205	0.645496	0.834034	0.761893	0.560697	0.747903	0.652444	0.869819	0.72744	0.561839	0.634076	0.649303	0.631506	0.68033	0.892756	0.913884	0.802342	0.65292	0.678902	0.635789	0.737434	0.65016	0.699935	0.476279	0.582397	0.781499	0.935679	0.654728	0.796536	0.814524	0.84555	0.728202	0.725727	0.884381	0.750472
cg00662556	0.692488	0.44429	0.629843	0.592385	0.55749	0.661899	0.497776	0.690565	0.523054	0.677377	0.547416	0.477993	0.734618	0.744418	0.645688	0.618395	0.541646	0.756141	0.604566	0.508766	0.571503	0.755866	0.690657	0.574983	0.686535	0.594491	0.613816	0.577273	0.687268	0.673622	0.75898	0.656404	0.382469	0.606947	0.617113	0.536334	0.435772	0.520673	0.593026	0.546408	0.831974	0.477902	0.637537	0.661074	0.516918	0.61345	0.776778	0.69084	0.569213
cg00665395	0.0223116	0.0761005	0.0398585	0.0702788	0.0427284	0.0441223	0.0592094	0.0467461	0.0597014	0.0587995	0.0478121	0.065851	0.0280512	0.0602754	0.0459262	0.0476481	0.0430564	0.048632	0.0290352	0.0529778	0.0610953	0.0423184	0.0438763	0.0632272	0.0558476	0.0587995	0.0442863	0.0715087	0.0558476	0.0553557	0.0611773	0.0436303	0.0458442	0.0465002	0.0393666	0.0428924	0.049206	0.0615053	0.0857759	0.032151	0.0365787	0.0731486	0.031905	0.0515839	0.0539617	0.0634732	0.0411431	0.0346108	0.0534698
cg00666446	0.048417	0.0642243	0.0508013	0.0622815	0.0655489	0.0399393	0.0755279	0.0645775	0.067845	0.0742032	0.0511546	0.0743799	0.0373783	0.0573362	0.0506247	0.0363186	0.0452378	0.0477988	0.0514195	0.057866	0.0580427	0.0520376	0.0598972	0.0535389	0.0542454	0.0656372	0.0450612	0.0596322	0.0485053	0.0429418	0.0400276	0.0637828	0.0380848	0.0410873	0.0634295	0.0389679	0.0523026	0.0574245	0.0549518	0.0332278	0.0550402	0.0596322	0.0422353	0.0573362	0.0489468	0.0511546	0.0503009	0.0319915	0.0598088
cg00666746	0.214402	0.294949	0.498751	0.438009	0.158417	0.661505	0.53128	0.234317	0.241067	0.411565	0.39519	0.411565	0.748801	0.254454	0.748248	0.379701	0.0961261	0.268727	0.551084	0.38313	0.314754	0.369964	0.60895	0.221594	0.298047	0.451728	0.502402	0.224138	0.150783	0.543118	0.732426	0.201236	0.351044	0.244939	0.565357	0.379147	0.119582	0.140272	0.277689	0.350934	0.36576	0.335555	0.54854	0.180878	0.1624	0.544225	0.543044	0.16229	0.226573
cg00668685	0.234066	0.459957	0.339215	0.397584	0.411176	0.41539	0.419183	0.210044	0.363553	0.321093	0.426242	0.622211	0.546036	0.171377	0.23965	0.328784	0.340058	0.307186	0.26304	0.429403	0.486297	0.256297	0.282531	0.33342	0.271996	0.338161	0.362078	0.621052	0.211941	0.238807	0.227534	0.476393	0.65424	0.279687	0.573851	0.541189	0.302023	0.319407	0.433828	0.416022	0.17064	0.495569	0.283058	0.280319	0.377355	0.389261	0.215979	0.314034	0.380621
cg00669623	0.428833	0.0566552	0.0916942	0.0738901	0.0721016	0.0617769	0.0600696	0.0729146	0.080963	0.0744592	0.0604761	0.0669799	0.050314	0.100718	0.0586063	0.0608826	0.0526716	0.0555983	0.0501514	0.0554357	0.0744592	0.0668986	0.0685245	0.0653539	0.0743779	0.0640532	0.0482003	0.0519399	0.0394202	0.0551918	0.0583624	0.0573868	0.0663295	0.0657604	0.0586063	0.253394	0.0525903	0.0818572	0.0922632	0.0461679	0.0642971	0.0677929	0.0526716	0.356153	0.0597445	0.058525	0.0870331	0.0475499	0.0518587
cg00669856	0.0322236	0.0619716	0.0638705	0.0888715	0.0355465	0.0489964	0.0584905	0.0489964	0.0713075	0.0627628	0.0333312	0.0678263	0.0369706	0.0621299	0.0315907	0.0485217	0.0595981	0.041243	0.0760545	0.0515282	0.0714657	0.0546929	0.0524776	0.0727316	0.0494711	0.0572246	0.0437747	0.058807	0.0510535	0.101372	0.0627628	0.0777951	0.04868	0.063554	0.0319071	0.0551676	0.0591234	0.0787445	0.0646616	0.0417177	0.0364959	0.0543764	0.0564334	0.0633958	0.0493129	0.0497876	0.0689867	0.0326983	0.0567499
cg00671161	0.0210555	0.0155176	0.0121586	0.012431	0.0120678	0.0144282	0.00889038	0.012431	0.017061	0.0136112	0.0114323	0.0110692	0.0107061	0.0137927	0.0106153	0.0127033	0.0112508	0.0127941	0.013248	0.0140651	0.0153361	0.0114323	0.0126125	0.0144282	0.0114323	0.01579	0.0141559	0.0123402	0.00861803	0.0108876	0.0108876	0.0101614	0.00952587	0.0136112	0.014519	0.0117955	0.0131573	0.01579	0.013248	0.0137927	0.0142467	0.0141559	0.00952587	0.0141559	0.00988901	0.0112508	0.0133993	0.0114323	0.0133388
cg00672638	0.107093	0.099832	0.0852268	0.0955412	0.080936	0.0877848	0.0793682	0.0968615	0.0934784	0.0962014	0.083494	0.0984293	0.0957063	0.0892701	0.0745823	0.0851443	0.0873722	0.0898477	0.0927357	0.0917455	0.086382	0.0918281	0.0879498	0.0976041	0.099337	0.0838241	0.0816787	0.0895176	0.0722719	0.0884449	0.0881149	0.0839066	0.0839066	0.0820087	0.0862995	0.0931483	0.0852268	0.0806885	0.106846	0.0825863	0.0896827	0.0886925	0.0832465	0.0759026	0.0858044	0.0934784	0.0820362	0.0824213	0.0869596
cg00673191	0.0535253	0.333042	0.198655	0.295439	0.138222	0.170811	0.194716	0.117182	0.170453	0.122643	0.279591	0.454088	0.0931876	0.0870995	0.145653	0.14628	0.10223	0.238765	0.184957	0.22256	0.300631	0.106528	0.0753709	0.228201	0.189434	0.167857	0.319343	0.215935	0.153979	0.0594343	0.0323064	0.168394	0.375211	0.167051	0.317374	0.308958	0.127836	0.160784	0.261238	0.170095	0.0592553	0.36384	0.150756	0.0922923	0.156038	0.191761	0.0903524	0.150219	0.26652
cg00676660	0.0382204	0.0570928	0.0437818	0.081709	0.0340265	0.020442	0.0231771	0.0267328	0.0341177	0.0320207	0.04442	0.0549958	0.695929	0.0297414	0.0323854	0.041776	0.0415025	0.0248182	0.0887291	0.0313825	0.038585	0.0384939	0.38932	0.315016	0.0242712	0.0538106	0.40017	0.041776	0.0262769	0.0222654	0.0167951	0.0468816	0.034847	0.0516225	0.0332059	0.0253652	0.0262769	0.0400438	0.0391321	0.0257299	0.0240888	0.0594632	0.041229	0.0339353	0.0194391	0.0580957	0.0446631	0.0310178	0.0466993
cg00677811	0.0243002	0.0294109	0.02456	0.0381598	0.0223078	0.0214416	0.0303638	0.0234339	0.036514	0.0342618	0.0265523	0.0391993	0.0248199	0.0301039	0.0329624	0.0303638	0.022048	0.0237804	0.0247333	0.0323561	0.0415381	0.0288045	0.0299306	0.0419712	0.0313166	0.0382464	0.0233473	0.035821	0.0226543	0.0342618	0.029151	0.0359942	0.0267256	0.0294975	0.0372936	0.0275052	0.0370337	0.0375535	0.0429241	0.0181499	0.0288045	0.0288912	0.0249065	0.0331357	0.029151	0.0240403	0.0293532	0.0289778	0.0294975
cg00678539	0.129507	0.21294	0.121407	0.229445	0.171122	0.549609	0.16768	0.116142	0.262656	0.151985	0.16201	0.164642	0.861673	0.0828291	0.137101	0.440761	0.104295	0.202511	0.127482	0.369884	0.248177	0.0975109	0.186412	0.12728	0.153808	0.272174	0.386084	0.131431	0.184792	0.100143	0.820969	0.146923	0.37282	0.103181	0.481263	0.529156	0.124242	0.114015	0.296373	0.405525	0.10875	0.215775	0.411803	0.113914	0.121508	0.358746	0.110066	0.136696	0.590921
cg00679556	0.437402	0.477882	0.265339	0.304144	0.25473	0.251659	0.344252	0.186612	0.388082	0.619143	0.312519	0.566194	0.179726	0.169769	0.132639	0.250729	0.305167	0.154693	0.425956	0.455083	0.478813	0.343879	0.457316	0.356721	0.149017	0.294001	0.230163	0.548048	0.129289	0.0771765	0.105559	0.238631	0.569544	0.13115	0.403901	0.429678	0.220299	0.204386	0.376636	0.297909	0.468949	0.499751	0.21667	0.283485	0.286649	0.264315	0.109033	0.231187	0.32443
cg00679738	0.106258	0.059077	0.0397357	0.0397357	0.0255227	0.0230318	0.0291859	0.0240575	0.0438384	0.0728503	0.0117494	0.044864	0.0324094	0.00925844	0.0199548	0.0176104	0.0247901	0.0307976	0.0227388	0.0422266	0.103474	0.0372447	0.147871	0.0381239	0.0379774	0.0400287	0.0209805	0.0432523	0.0187826	0.0209805	0.0195152	0.0392961	0.0287463	0.0458897	0.0139472	0.0205409	0.0274276	0.0275741	0.047648	0.032849	0.0341677	0.0381239	0.0228853	0.0372447	0.0176104	0.0259623	0.0391496	0.0220061	0.0470619
cg00682653	0.0314866	0.0166083	0.0286899	0.0129167	0.0147066	0.0154897	0.00956072	0.0150422	0.0206355	0.0175033	0.0148185	0.0173914	0.0135879	0.0181745	0.0133642	0.0167202	0.0166083	0.0123574	0.016049	0.0153778	0.0181745	0.0149303	0.0133642	0.0202999	0.0133642	0.0213067	0.0213067	0.0141473	0.00888952	0.0123574	0.0119099	0.0125811	0.0116862	0.0147066	0.0175033	0.0158253	0.0159371	0.0202999	0.0171677	0.0159371	0.0162727	0.0147066	0.014371	0.0173914	0.0114625	0.0161609	0.0220152	0.0156015	0.0222017
cg00685836	0.360704	0.304685	0.321753	0.610162	0.100413	0.627997	0.381273	0.543312	0.375693	0.738502	0.226127	0.201619	0.664431	0.104461	0.704475	0.270329	0.35206	0.0986623	0.388275	0.390901	0.111573	0.0360787	0.596377	0.176563	0.17908	0.605895	0.482588	0.183347	0.410158	0.388166	0.528104	0.355014	0.334116	0.219234	0.400967	0.252495	0.280286	0.364095	0.287398	0.435213	0.408516	0.0726223	0.204354	0.241116	0.126343	0.448999	0.317705	0.218687	0.278754
cg00686022	0.929699	0.898093	0.907471	0.758068	0.923415	0.883274	0.936639	0.934951	0.878866	0.916756	0.908409	0.853262	0.899312	0.895842	0.703858	0.87474	0.877084	0.931481	0.735465	0.890402	0.889558	0.88318	0.790987	0.871738	0.951364	0.864423	0.567585	0.891059	0.862735	0.933357	0.856357	0.872676	0.906534	0.825782	0.881867	0.88787	0.878679	0.692041	0.713331	0.887401	0.861047	0.872582	0.869863	0.851762	0.92651	0.912067	0.72593	0.882149	0.87352
cg00686623	0.0480959	0.0448709	0.0478413	0.0538671	0.0536974	0.0370628	0.0293396	0.037572	0.0669371	0.0449557	0.0390997	0.0457196	0.0400333	0.034941	0.0423248	0.0590442	0.0561586	0.0508118	0.0351108	0.0397786	0.0397786	0.0383358	0.039524	0.0594685	0.0385056	0.0607416	0.0371477	0.0530184	0.0378266	0.0320555	0.0402879	0.0372325	0.0334134	0.047417	0.026454	0.0518302	0.0347713	0.074236	0.0678707	0.0409668	0.046059	0.0385056	0.0282363	0.0372325	0.0357897	0.0318857	0.0524243	0.0365536	0.0575165
cg00687686	0.509252	0.464626	0.612267	0.690362	0.0726897	0.733632	0.550854	0.166321	0.606324	0.792543	0.710068	0.30562	0.860524	0.131287	0.831643	0.43345	0.112728	0.570456	0.622172	0.562115	0.0826992	0.509773	0.782846	0.07832	0.156624	0.757092	0.695992	0.0708129	0.257241	0.0677891	0.843216	0.665234	0.29926	0.484019	0.693281	0.385384	0.057154	0.204899	0.71403	0.364218	0.758761	0.117107	0.539385	0.426152	0.353478	0.586304	0.197079	0.268084	0.367763
cg00688421	0.031597	0.0456015	0.0686329	0.040624	0.0313439	0.0383462	0.0558939	0.0252697	0.0468669	0.0449266	0.0375869	0.0464451	0.0356465	0.028813	0.0333687	0.0318501	0.039696	0.0338749	0.0405396	0.0490604	0.052435	0.0432393	0.0354778	0.0701514	0.0434924	0.0545441	0.0373338	0.0425644	0.0303316	0.0391898	0.0320188	0.0328625	0.0336218	0.0379243	0.0479637	0.0229075	0.0364058	0.0527724	0.0474575	0.028813	0.0574125	0.0410458	0.0322719	0.0293192	0.0435767	0.0404553	0.0416645	0.0262821	0.0380931
cg00689340	0.118524	0.285813	0.222718	0.236418	0.193175	0.192802	0.239307	0.125327	0.250864	0.143873	0.230733	0.411256	0.106128	0.0617666	0.160369	0.161208	0.13008	0.060555	0.158505	0.250025	0.257201	0.10706	0.0872094	0.216567	0.0665196	0.214144	0.18982	0.25776	0.103892	0.0682904	0.0569203	0.212933	0.263445	0.134647	0.270901	0.305198	0.14145	0.179941	0.272579	0.163352	0.0441523	0.29448	0.163445	0.130453	0.148067	0.237537	0.142103	0.139027	0.253007
cg00690049	0.103153	0.0900653	0.393779	0.345895	0.055373	0.378199	0.52133	0.283885	0.422031	0.111462	0.0853912	0.0777049	0.254283	0.0841448	0.220941	0.100452	0.23382	0.0717843	0.0733424	0.0456093	0.228108	0.0901692	0.316396	0.116864	0.417357	0.283885	0.130159	0.101906	0.0642019	0.177315	0.250959	0.399388	0.46119	0.185106	0.693753	0.41715	0.202452	0.0833138	0.349946	0.27838	0.0785358	0.0643057	0.364488	0.0719921	0.313073	0.42494	0.29036	0.37072	0.269551
cg00690280	0.742594	0.685396	0.487184	0.627985	0.832933	0.371614	0.872169	0.882753	0.761089	0.874842	0.783433	0.684755	0.771566	0.9268	0.712338	0.792841	0.457249	0.848542	0.515088	0.846938	0.549192	0.835606	0.448376	0.774346	0.636538	0.451155	0.189117	0.692773	0.899324	0.872811	0.350552	0.525672	0.751039	0.462915	0.502793	0.505145	0.603289	0.630337	0.642311	0.8185	0.868427	0.687	0.672781	0.764724	0.74377	0.710948	0.830795	0.828229	0.615263
cg00691625	0.708158	0.782767	0.577724	0.609099	0.784865	0.816765	0.820333	0.84174	0.740478	0.493356	0.813722	0.750132	0.71225	0.873115	0.755588	0.540472	0.750761	0.802389	0.425883	0.791476	0.603433	0.827259	0.683603	0.58465	0.845937	0.648765	0.535435	0.557367	0.866609	0.841215	0.699343	0.78518	0.667443	0.850869	0.864511	0.782976	0.601754	0.614766	0.641629	0.832296	0.849925	0.690739	0.612667	0.714454	0.789063	0.72946	0.833625	0.778674	0.751811
cg00692549	0.0969497	0.0661835	0.0385829	0.0892334	0.0617318	0.0791429	0.0436282	0.0554994	0.0579725	0.0959604	0.0514434	0.0669749	0.0538176	0.135432	0.0500584	0.0542133	0.046497	0.0846828	0.057379	0.0647985	0.0594564	0.0552026	0.0497616	0.0818139	0.0531251	0.0669749	0.0518391	0.0744933	0.04254	0.0536198	0.0599511	0.08033	0.0326473	0.0554994	0.0779557	0.0625232	0.0651942	0.0602479	0.074889	0.0527294	0.0896291	0.0649963	0.0489702	0.0524326	0.0474863	0.055994	0.0661835	0.0712287	0.0599511
cg00695416	0.0247751	0.102958	0.0925334	0.0613587	0.0435586	0.0793554	0.0619487	0.0743399	0.068046	0.0533929	0.0515244	0.120954	0.0905665	0.0432636	0.047394	0.0505409	0.0559498	0.0194646	0.0811256	0.103941	0.0875179	0.0757167	0.065194	0.0642106	0.0458205	0.0472956	0.0446404	0.0608669	0.054868	0.0458205	0.0781753	0.0412967	0.0670626	0.0329376	0.0608669	0.0509343	0.0429685	0.0894847	0.0730615	0.0522128	0.0520161	0.0859444	0.0287088	0.0549664	0.0675543	0.188319	0.541108	0.0245784	0.0661775
cg00698688	0.426009	0.497941	0.345438	0.383376	0.323182	0.358773	0.330507	0.288343	0.360932	0.187019	0.409764	0.547242	0.214157	0.124383	0.242047	0.287874	0.344405	0.236977	0.297828	0.459628	0.46498	0.223924	0.176501	0.369854	0.189366	0.378587	0.340837	0.417276	0.218195	0.184295	0.174623	0.296137	0.607342	0.254819	0.381498	0.530527	0.314731	0.350039	0.435682	0.444697	0.0825012	0.501979	0.224111	0.227774	0.268999	0.347222	0.177816	0.222797	0.394645
cg00702231	0.723387	0.652383	0.632058	0.510287	0.683178	0.738696	0.551904	0.591585	0.597128	0.650799	0.585778	0.673851	0.801518	0.636194	0.632674	0.641825	0.642529	0.947045	0.597392	0.639977	0.635138	0.686433	0.566069	0.669892	0.576716	0.44553	0.670332	0.652383	0.566861	0.645608	0.63285	0.610062	0.568533	0.628803	0.823338	0.680714	0.662325	0.587802	0.65951	0.392563	0.746351	0.661709	0.53809	0.637601	0.538002	0.589474	0.63722	0.584986	0.659158
cg00702729	0.950783	0.958964	0.952781	0.956586	0.954588	0.953066	0.960106	0.959916	0.933088	0.957157	0.946883	0.96296	0.662819	0.888757	0.959155	0.949166	0.951639	0.940033	0.943743	0.955254	0.946883	0.940223	0.950117	0.934325	0.964958	0.94869	0.957442	0.959535	0.962104	0.950878	0.948214	0.94888	0.94888	0.946217	0.953352	0.951068	0.955349	0.947263	0.962009	0.951449	0.940128	0.960391	0.946692	0.947453	0.945836	0.957537	0.93572	0.958584	0.924717
cg00704310	0.031589	0.0340241	0.0511753	0.0404823	0.032436	0.432844	0.0267189	0.0196255	0.0306362	0.0420703	0.0253426	0.0246015	0.0258719	0.0565748	0.0362474	0.035718	0.0208959	0.0309538	0.0314831	0.048952	0.0331771	0.029154	0.0287305	0.0321184	0.0298951	0.0325419	0.0271424	0.0382589	0.0347652	0.0270365	0.0313773	0.0404823	0.0219547	0.0373061	0.100406	0.0197314	0.0311655	0.0248132	0.050646	0.0197314	0.0410116	0.101147	0.0343417	0.0404823	0.0279894	0.0294716	0.0355769	0.0293657	0.0294716
cg00704909	0.0559504	0.0585651	0.036994	0.0579931	0.0452466	0.0337257	0.0608529	0.0430405	0.0764592	0.04876	0.0540711	0.0659188	0.0384648	0.156288	0.0727823	0.0425502	0.0521101	0.0551333	0.053826	0.0530906	0.0853654	0.0510479	0.0556236	0.0454917	0.0614249	0.0441844	0.0542345	0.0561138	0.0575028	0.0476978	0.0526821	0.0457368	0.0633041	0.0601992	0.0380562	0.0437758	0.0535808	0.0543979	0.0780117	0.0441027	0.0694323	0.0474527	0.0382197	0.0527638	0.0615883	0.0319281	0.0439937	0.0469625	0.0447563
cg00707317	0.642151	0.26182	0.648461	0.670906	0.0637407	0.0470876	0.327604	0.5292	0.466001	0.76886	0.0300208	0.17152	0.527855	0.00240356	0.790064	0.331432	-0.0042163	0.795753	0.61681	0.501479	0.06974	0.00912686	0.595606	0.0123334	0.0060238	0.652288	0.550715	0.0773942	0.0194704	0.115045	0.761826	0.0114024	0.037675	0.702247	0.637807	0.294505	0.0154364	0.00550662	0.548853	0.666355	0.642048	0.101598	0.385321	0.00871312	0.0270212	0.449658	0.374426	0.310434	0.280438
cg00708598	0.559843	0.509498	0.74162	0.715733	0.731627	0.705455	0.603812	0.745522	0.591916	0.808716	0.532244	0.52739	0.783115	0.528342	0.74457	0.29917	0.718208	0.84155	0.603432	0.500552	0.4523	0.789681	0.730961	0.709547	0.74438	0.731341	0.684422	0.337714	0.738479	0.758085	0.517016	0.623798	0.381112	0.622466	0.578497	0.600386	0.366551	0.577926	0.639311	0.647972	0.840788	0.551278	0.758846	0.68052	0.537668	0.575642	0.816171	0.578973	0.693749
cg00708642	0.253183	0.0458318	0.0193168	0.0403953	0.0156925	0.0293315	0.0249441	0.0212244	0.0287592	0.0444966	0.0232273	0.0299991	0.0181723	0.0155971	0.0414445	0.0219874	0.0179815	0.0228458	0.0184584	0.0237996	0.0516499	0.0306668	0.0305714	0.0274239	0.0298084	0.0274239	0.0210336	0.0310483	0.0404907	0.0196983	0.0307622	0.0226551	0.0201752	0.0192215	0.0200799	0.029713	0.0241811	0.0387739	0.03906	0.0286638	0.0226551	0.0362941	0.0181723	0.0245626	0.0226551	0.0345773	0.0253574	0.0268517	0.032479
cg00711916	0.0417372	0.0522915	0.0328823	0.0505027	0.0393222	0.0400378	0.0649031	0.048356	0.0445994	0.0440627	0.0420055	0.053186	0.0328823	0.0481771	0.028589	0.0422739	0.0338662	0.049161	0.037265	0.0476405	0.0559587	0.0458516	0.053186	0.0448677	0.0424527	0.0469249	0.0426316	0.0770674	0.0289468	0.0427211	0.0412005	0.0456727	0.0350289	0.050771	0.0533649	0.0358339	0.045136	0.0924517	0.0606098	0.0519338	0.076978	0.0501449	0.0363706	0.0513971	0.0455833	0.0367284	0.0401868	0.026174	0.0513971
cg00712898	0.0304103	0.0151394	0.0160727	0.0121701	0.0126791	0.0167514	0.0130185	0.0181088	0.019551	0.0138669	0.0161575	0.0131882	0.0154788	0.0453418	0.0126791	0.0148001	0.0174301	0.0162423	0.0168362	0.0121701	0.0149698	0.015903	0.0135275	0.0155636	0.0142911	0.0191268	0.015394	0.0135275	0.0113217	0.0193814	0.013782	0.0220962	0.0118308	0.021672	0.0399122	0.0148001	0.0146304	0.016412	0.0113217	0.0160727	0.0160727	0.0114914	0.0187875	0.0187875	0.0157333	0.0142911	0.0224072	0.0219265	0.0161575
cg00714377	0.62465	0.430991	0.426792	0.127013	0.226625	0.459541	0.402125	0.578571	0.44621	0.732449	0.375779	0.136355	0.681331	0.808128	0.584134	0.3424	0.357096	0.687419	0.311646	0.290338	0.287504	0.612894	0.341036	0.230193	0.764043	0.301254	0.142023	0.469618	0.650786	0.820304	0.503626	0.341771	0.257799	0.466049	0.644279	0.366647	0.400341	0.469198	0.355941	0.540888	0.586128	0.32865	0.392469	0.301149	0.604707	0.423328	0.643544	0.440017	0.534171
cg00717862	0.0398318	0.0345173	0.033853	0.0369254	0.0253001	0.038088	0.0351816	0.03377	0.0366763	0.0358459	0.0394166	0.0409943	0.0377558	0.0283725	0.0269608	0.0320262	0.0444819	0.0320262	0.03377	0.074874	0.0370085	0.0349325	0.0326074	0.0496303	0.0318601	0.0361781	0.0350155	0.0430703	0.0415756	0.0309467	0.029535	0.121708	0.0306145	0.0379219	0.0376728	0.0298672	0.0437346	0.0333548	0.038171	0.03377	0.0346004	0.0297011	0.0324414	0.0331057	0.0326074	0.0362611	0.0386139	0.0307806	0.0414925
cg00718440	0.0283493	0.0707539	0.11013	0.0597921	0.0508497	0.02633	0.0543113	0.0515708	0.0820041	0.067148	0.0834464	0.0900811	0.0217145	0.0708981	0.0518593	0.0365706	0.0508497	0.0657057	0.0196953	0.0616672	0.0798406	0.0900811	0.0857541	0.0903696	0.0610902	0.0811387	0.0414745	0.117341	0.0486862	0.0605133	0.0517151	0.0243107	0.0527247	0.0264742	0.0297916	0.0445034	0.0583498	0.0978697	0.0838791	0.0266185	0.0421957	0.0475323	0.0527247	0.0753693	0.0496958	0.0670038	0.0652249	0.0521478	0.0899369
cg00718513	0.155389	0.357065	0.238668	0.193209	0.327629	0.238202	0.276208	0.329958	0.229259	0.318127	0.24109	0.40653	0.215938	0.20802	0.0916721	0.219665	0.195445	0.167685	0.170666	0.341416	0.295957	0.1185	0.163679	0.244257	0.138901	0.224881	0.224788	0.298472	0.117941	0.15809	0.273693	0.30108	0.500055	0.12735	0.275091	0.370479	0.135454	0.141323	0.265589	0.219292	0.081891	0.324834	0.153526	0.246586	0.196842	0.277419	0.136976	0.300149	0.194979
cg00718748	0.0362055	0.0375876	0.026693	0.0360429	0.0284004	0.0276687	0.023197	0.0405958	0.0310021	0.044417	0.0319777	0.0373437	0.028563	0.0354737	0.0249044	0.0225466	0.0227092	0.0334412	0.0231157	0.0323842	0.0334412	0.0272621	0.0256361	0.0307582	0.0299451	0.0344168	0.0316525	0.0365307	0.0234409	0.0175871	0.0268556	0.026693	0.02775	0.0288069	0.0529538	0.0302704	0.0303517	0.0379128	0.0423032	0.0268556	0.0219775	0.0391324	0.0238474	0.030189	0.0313273	0.0216522	0.0425471	0.0281565	0.0298638
cg00720072	0.0333399	0.0402415	0.0357861	0.03963	0.0297581	0.0356987	0.0297581	0.0445223	0.0590245	0.050725	0.03963	0.0608591	0.050725	0.0352619	0.0553553	0.0357861	0.030457	0.0538701	0.028535	0.0419014	0.0411152	0.0393679	0.0306317	0.0399795	0.0448718	0.042513	0.0273993	0.0441729	0.0236427	0.0198861	0.0301075	0.0754486	0.0522102	0.0282729	0.0412899	0.0430371	0.0435613	0.0366597	0.0283603	0.0233806	0.0395426	0.0391932	0.0265256	0.0380575	0.030719	0.0376207	0.0491816	0.0244289	0.0315053
cg00720137	0.0305464	0.45583	0.485977	0.490071	0.0198771	0.530143	0.0453098	0.0630506	0.317625	0.755936	0.011565	0.0636709	0.804072	0.0258321	0.0204974	0.0435729	0.0278171	0.0326555	0.0389826	0.0562272	0.033648	0.615002	0.380028	0.059825	0.0281893	0.62778	0.352487	0.0393548	0.0299261	0.0299261	0.368367	0.0290577	0.332513	0.0464263	0.501113	0.299512	0.0386104	0.0532497	0.0465504	0.0267005	0.0479151	0.0445654	0.0289336	0.0512647	0.025708	0.501485	0.45186	0.0131778	0.0213659
cg00720723	0.0378245	0.0356252	0.0364711	0.03977	0.0382474	0.0316495	0.0345255	0.0390087	0.0467909	0.0516124	0.0327492	0.0385012	0.0330029	0.0264896	0.027843	0.0405313	0.0436611	0.0367248	0.0425614	0.043069	0.0401084	0.0405313	0.0406159	0.0439994	0.0293656	0.0407851	0.0400238	0.0685301	0.0301269	0.0300423	0.0384166	0.0422231	0.0294502	0.0511049	0.0323262	0.0370632	0.0357943	0.0435765	0.0442532	0.0407851	0.0382474	0.0401084	0.0369786	0.0412926	0.0291118	0.035456	0.0386704	0.0286043	0.044507
cg00722300	0.876696	0.88543	0.475733	0.680581	0.900288	0.602204	0.880212	0.88214	0.80467	0.840853	0.838698	0.88146	0.897793	0.902217	0.489571	0.574528	0.561824	0.589386	0.867054	0.814765	0.524847	0.880098	0.723003	0.705535	0.868189	0.594264	0.437508	0.871024	0.909022	0.850381	0.675477	0.843689	0.891668	0.712114	0.825767	0.806371	0.530518	0.621146	0.828716	0.852763	0.799452	0.799452	0.489911	0.58621	0.799225	0.857186	0.758959	0.874314	0.741264
cg00724662	0.118629	0.0684414	0.0614203	0.0830904	0.0467713	0.0569129	0.0667945	0.0422639	0.0774562	0.057173	0.0568263	0.0714753	0.0452978	0.0517988	0.0581265	0.0452111	0.0439976	0.0546593	0.0452978	0.068008	0.0868177	0.0452111	0.0715619	0.0691349	0.0675746	0.0721687	0.046858	0.0804033	0.061247	0.0451244	0.0671412	0.0732089	0.0623738	0.0608136	0.0495451	0.0616804	0.0744224	0.0736423	0.0775429	0.0477248	0.0632406	0.0600334	0.0414838	0.0604668	0.067488	0.0711285	0.0497185	0.0481582	0.0656677
cg00725635	0.0359105	0.117499	0.0660112	0.077629	0.0472643	0.0489366	0.05809	0.0916232	0.0620506	0.0742845	0.0812376	0.178669	0.0483205	0.032918	0.0668914	0.052017	0.0474403	0.0320379	0.0589701	0.0679475	0.129733	0.0478804	0.0565057	0.0918873	0.07094	0.0657472	0.421235	0.0726123	0.0841421	0.0682996	0.0412794	0.0500807	0.11037	0.0798294	0.105265	0.108082	0.0557136	0.0586181	0.0883667	0.0527211	0.0402232	0.131581	0.0443598	0.0355585	0.058354	0.0969041	0.10418	0.0330061	0.0870465
cg00725777	0.579507	0.883981	0.3632	0.473049	0.915322	0.20228	0.816263	0.841131	0.59677	0.919844	0.827566	0.858394	0.808248	0.834657	0.752244	0.559675	0.637566	0.58259	0.458252	0.828697	0.836712	0.718951	0.713813	0.765192	0.371215	0.611876	0.402454	0.579507	0.922824	0.648869	0.211528	0.522579	0.650308	0.282329	0.427424	0.589269	0.563168	0.28459	0.508809	0.653802	0.831471	0.709702	0.490621	0.563374	0.449826	0.66901	0.513365	0.737344	0.632119
cg00727590	0.0540257	0.169333	0.392647	0.156701	0.0897189	0.099801	0.282439	0.0857787	0.363328	0.0963244	0.188802	0.297156	0.175475	0.275833	0.0877488	0.24999	0.161685	0.452676	0.065035	0.180806	0.184514	0.30156	0.207228	0.135031	0.623725	0.137117	0.144997	0.141984	0.502624	0.0638761	0.0613266	0.202824	0.223684	0.210705	0.15589	0.177561	0.0699022	0.136537	0.236663	0.504362	0.181154	0.306659	0.0776666	0.107913	0.334704	0.155311	0.106291	0.38129	0.267721
cg00728317	0.0524963	0.0920634	0.0734771	0.0519262	0.0581976	0.126841	0.0384711	0.49754	0.0456548	0.0607062	0.0488475	0.0213672	0.0375589	0.0352784	0.046795	0.110194	0.0453127	0.0737052	0.0402955	0.100615	0.0961683	0.0469091	0.0696003	0.0431462	0.0732491	0.0896688	0.199134	0.0561452	0.0494176	0.064127	0.494918	0.0227355	0.037901	0.0425761	0.0875023	0.0562592	0.0516982	0.0384711	0.192178	0.0696003	0.0365327	0.0418919	0.0308314	0.0544348	0.0402955	0.102212	0.0392313	0.0652673	0.0719948
cg00728602	0.0867606	0.0831399	0.0535981	0.0674227	0.0893938	0.068081	0.0703028	0.0588646	0.0523638	0.0747464	0.0924385	0.0980342	0.0456161	0.0814941	0.0677518	0.0355769	0.0202711	0.0671758	0.0296521	0.0985279	0.0679164	0.0580417	0.0434766	0.0782848	0.0506357	0.0561491	0.0451224	0.0646249	0.047015	0.0531044	0.0497306	0.0453693	0.0580417	0.0624854	0.0661884	0.0509649	0.0663529	0.0652832	0.0679987	0.056972	0.101655	0.0773797	0.0314624	0.0494837	0.060675	0.04899	0.059715	0.0515409	0.0554085
cg00729275	0.515231	0.743919	0.31348	0.465646	0.3148	0.425625	0.697742	0.679491	0.419688	0.427604	0.628366	0.550964	0.269392	0.772285	0.17143	0.785919	0.606487	0.685868	0.446075	0.487085	0.402427	0.222115	0.220686	0.509074	0.493352	0.53766	0.437499	0.421777	0.671025	0.889158	0.454761	0.479169	0.562618	0.247623	0.539529	0.580539	0.261146	0.188472	0.643538	0.380877	0.163294	0.537001	0.485876	0.485546	0.520729	0.393961	0.138446	0.563718	0.45597
cg00729541	0.220212	0.0755571	0.0458089	0.0366556	0.0360018	0.0355114	0.0328962	0.0471165	0.036247	0.0457271	0.0485058	0.0649327	0.0389439	0.0392708	0.0406601	0.0403332	0.0385353	0.0322424	0.0240698	0.0342038	0.0409053	0.0378815	0.0319155	0.0425398	0.0252957	0.0428667	0.0401698	0.0441744	0.0316703	0.0364104	0.028483	0.0309348	0.0256226	0.0331414	0.0398429	0.0372277	0.0257043	0.0440109	0.045482	0.030281	0.0306079	0.0458906	0.0458906	0.027584	0.0340404	0.0294637	0.0404422	0.0198201	0.0391891
cg00729875	0.0662622	0.229027	0.160591	0.114479	0.109447	0.223263	0.162512	0.485571	0.294535	0.245038	0.214754	0.306338	0.00587734	0.0634259	0.0892268	0.38493	0.395177	0.0939844	0.268094	0.15565	0.36471	0.0491532	0.234974	0.129758	0.0647068	0.37267	0.369925	0.19426	0.14522	0.0169479	0.0464084	0.196181	0.222073	0.0974611	0.189868	0.270656	0.221708	0.0348804	0.225367	0.14275	0.00294958	0.275322	0.0880374	0.0887693	0.227929	0.206977	0.137962	0.139913	0.14275
cg00730260	0.820754	0.946722	0.900819	0.954654	0.922078	0.904203	0.947145	0.954337	0.925251	0.924405	0.902723	0.84233	0.931809	0.927895	0.934453	0.936991	0.931174	0.942808	0.783418	0.930751	0.796639	0.925674	0.963539	0.909598	0.961317	0.898175	0.861474	0.930434	0.961	0.960577	0.908434	0.973269	0.943549	0.926732	0.926097	0.93276	0.939212	0.910232	0.728525	0.904521	0.898809	0.930962	0.927684	0.942385	0.943654	0.942068	0.922748	0.950847	0.950318
cg00731459	0.0355394	0.0330421	0.0171588	0.0253502	0.0191567	0.0290463	0.0227529	0.0187571	0.0342408	0.0233523	0.0193565	0.0271483	0.0193565	0.0197561	0.0143617	0.02555	0.0209548	0.0225531	0.0181577	0.021754	0.0259495	0.0168591	0.0176583	0.0282471	0.0256498	0.0253502	0.0143617	0.0209548	0.019856	0.0224532	0.0173586	0.0285468	0.0172587	0.0244511	0.0156604	0.0163596	0.0186572	0.0336414	0.0364385	0.0204553	0.0297455	0.0185573	0.02555	0.0223533	0.0156604	0.01606	0.0230193	0.0316435	0.0247508
cg00733682	0.0290079	0.0340603	0.0300673	0.0455504	0.0270521	0.0351197	0.0216738	0.02803	0.0329194	0.213258	0.028356	0.0289264	0.019718	0.0202884	0.0145841	0.0224072	0.0337343	0.0346307	0.0264817	0.0471802	0.0315341	0.0236295	0.0294153	0.0331639	0.0316971	0.0336528	0.0327564	0.0416389	0.0272966	0.0258298	0.023548	0.0380533	0.0245259	0.0290894	0.0180067	0.0184141	0.0391942	0.0412314	0.0318601	0.0191476	0.0382163	0.0272151	0.0233036	0.0259928	0.0281115	0.0161324	0.0352827	0.0213478	0.032349
cg00734993	0.0201153	0.0265707	0.0252442	0.0266591	0.0227682	0.0161359	0.0232988	0.0304616	0.0234756	0.0291352	0.0163128	0.0229451	0.0197616	0.0271013	0.0172855	0.025598	0.0197616	0.0168434	0.021088	0.0202037	0.025598	0.0190541	0.0183467	0.0252442	0.0271013	0.0267476	0.0232103	0.0220608	0.0183467	0.0246252	0.026836	0.0181698	0.0160475	0.028693	0.0272781	0.0219723	0.0193194	0.0263938	0.0248021	0.0244484	0.0220608	0.0267476	0.018612	0.0148979	0.018612	0.019231	0.0387151	0.026836	0.0340873
cg00736326	0.0593417	0.0319372	0.0307885	0.0353833	0.0201221	0.00912746	0.0160196	0.0293116	0.0347269	0.0302962	0.0155273	0.0463779	0.0196298	0.0120812	0.0178247	0.0258655	0.0278347	0.0161837	0.0509727	0.0257014	0.0309526	0.0245528	0.0193016	0.0240605	0.0263578	0.0319372	0.0147068	0.0329218	0.0184811	0.0170042	0.0327577	0.041619	0.0140504	0.0360397	0.0109325	0.0155273	0.0184811	0.0345628	0.03325	0.0273424	0.0207785	0.0197939	0.0335782	0.0383371	0.0240605	0.0342346	0.028327	0.0263578	0.0355474
cg00737514	0.0262597	0.0242094	0.0342823	0.0374022	0.024566	0.0281316	0.0257248	0.0554977	0.0303601	0.0333909	0.0316972	0.0274185	0.0328561	0.0298253	0.024566	0.023318	0.024566	0.0283099	0.0316081	0.0210895	0.0294687	0.0227832	0.0241203	0.029647	0.0326778	0.0418592	0.0431072	0.0250117	0.020733	0.0323212	0.0241203	0.0262597	0.0237637	0.0316972	0.0299144	0.0208221	0.0267054	0.0268837	0.0313407	0.0363325	0.0305384	0.0277751	0.0222483	0.0316972	0.0228723	0.0259922	0.0407598	0.0269728	0.0288447
cg00739120	0.117065	0.270342	0.21285	0.409095	0.184714	0.630326	0.287204	0.575983	0.207365	0.583297	0.32631	0.480909	0.127324	0.323263	0.263638	0.289946	0.142966	0.219554	0.44749	0.561255	0.309855	0.236111	0.74917	0.199849	0.432355	0.474408	0.428394	0.237736	0.137278	0.665065	0.497973	0.168868	0.387154	0.254496	0.74663	0.317473	0.279484	0.15607	0.454296	0.38817	0.0512437	0.343985	0.135551	0.208787	0.335351	0.481721	0.157729	0.218437	0.496145
cg00741717	0.708695	0.906793	0.711878	0.564704	0.489307	0.455284	0.847528	0.850052	0.863771	0.943559	0.933023	0.843138	0.935876	0.942791	0.503794	0.919304	0.82492	0.932694	0.825578	0.923804	0.773118	0.569314	0.814713	0.792544	0.726914	0.536938	0.571289	0.756985	0.955851	0.836005	0.499404	0.721426	0.800336	0.657552	0.894281	0.687624	0.67621	0.880343	0.631212	0.884733	0.946522	0.822396	0.526951	0.876063	0.863552	0.744364	0.749303	0.813286	0.86432
cg00743372	0.0357229	0.0239584	0.0180762	0.0344158	0.0334821	0.0178895	0.0219977	0.0354428	0.0308677	0.0223712	0.0205038	0.0273197	0.0176094	0.0198502	0.0838079	0.0205038	0.0161155	0.0171425	0.0188232	0.0197568	0.0374969	0.0249855	0.0260126	0.0309611	0.0190099	0.0401112	0.016769	0.0295606	0.0202237	0.0223712	0.0309611	0.0325484	0.0272264	0.0344158	0.0258258	0.0247054	0.0272264	0.0293738	0.0282534	0.0179828	0.0205972	0.0215309	0.0176094	0.0219043	0.0278799	0.0201303	0.0253901	0.023585	0.0297473
cg00744433	0.182672	0.630788	0.275992	0.534979	0.228799	0.241686	0.31021	0.220533	0.322919	0.195648	0.38691	0.596215	0.538801	0.131568	0.16543	0.219822	0.23742	0.196892	0.190138	0.3846	0.410463	0.131835	0.362203	0.323808	0.141967	0.276792	0.322742	0.48112	0.103039	0.0677546	0.132723	0.291901	0.59897	0.250396	0.378289	0.491607	0.2232	0.2232	0.344961	0.282836	0.0570005	0.515693	0.186671	0.169963	0.34185	0.372512	0.13619	0.201514	0.316076
cg00745543	0.953376	0.9174	0.872909	0.839326	0.896542	0.740872	0.938832	0.915774	0.883243	0.9307	0.934718	0.87578	0.918453	0.912999	0.801341	0.900369	0.909267	0.925533	0.598596	0.918453	0.873675	0.873579	0.951462	0.887165	0.928882	0.676097	0.782875	0.702696	0.968971	0.491148	0.497368	0.884295	0.946965	0.775986	0.92869	0.845449	0.497272	0.873101	0.50751	0.939406	0.905919	0.901804	0.899412	0.892428	0.80402	0.87377	0.850871	0.91032	0.92869
cg00745735	0.758727	0.864868	0.738603	0.801898	0.810878	0.876661	0.833166	0.874497	0.717721	0.858052	0.870819	0.861514	0.793891	0.848963	0.580744	0.802439	0.847881	0.881206	0.596325	0.853075	0.764353	0.87255	0.813583	0.720426	0.829596	0.780691	0.790862	0.779285	0.882612	0.805144	0.592105	0.625646	0.856537	0.766409	0.614934	0.865517	0.608659	0.710472	0.715124	0.858593	0.720859	0.854265	0.61039	0.843229	0.763921	0.819534	0.799589	0.859783	0.854373
cg00746083	0.0236884	0.0353396	0.0293427	0.0339689	0.0375671	0.0299424	0.0234314	0.0313131	0.0286573	0.0335406	0.0300281	0.0312275	0.0291714	0.0284003	0.0199189	0.0298567	0.0460485	0.0276293	0.036025	0.0373101	0.0247165	0.0210327	0.027715	0.0271153	0.0250592	0.0303707	0.0367104	0.0260872	0.021204	0.029514	0.0260015	0.0299424	0.0231744	0.0254875	0.028743	0.0238598	0.0301137	0.0241168	0.0325982	0.0254019	0.0328552	0.0254019	0.0377384	0.0301137	0.0177772	0.0252305	0.0472193	0.0254019	0.0452774
cg00746130	0.0624116	0.0730777	0.0434686	0.0945806	0.0388609	0.0505509	0.0468818	0.0421034	0.0535374	0.0691526	0.0511482	0.0524282	0.0955192	0.0700912	0.0421887	0.056268	0.087669	0.0467111	0.0595958	0.0725658	0.037581	0.0348504	0.0474791	0.0635209	0.0784534	0.0584865	0.0580599	0.0589132	0.0592545	0.0474791	0.056012	0.0514895	0.0407381	0.0576332	0.0608757	0.0537934	0.0582305	0.049527	0.068982	0.04253	0.075211	0.0526842	0.0572066	0.0603637	0.0399702	0.0411648	0.0726226	0.0784534	0.0615583
cg00746981	0.0686294	0.168371	0.321118	0.215392	0.214252	0.183902	0.160392	0.085728	0.228073	0.224226	0.0919974	0.206415	0.142581	0.112658	0.200288	0.158967	0.151557	0.14714	0.248164	0.189744	0.118928	0.248449	0.161674	0.40604	0.0751839	0.393644	0.176065	0.100119	0.0739015	0.0989793	0.187464	0.145003	0.132321	0.212827	0.186609	0.185612	0.0871528	0.115793	0.251156	0.23819	0.375548	0.171078	0.32525	0.144148	0.165236	0.176065	0.187512	0.14999	0.0840181
cg00747849	0.192856	0.289294	0.189351	0.23612	0.169894	0.124092	0.21195	0.234791	0.168806	0.16651	0.183671	0.306697	0.0923079	0.149349	0.101855	0.165543	0.0895284	0.0999215	0.0868697	0.24748	0.271046	0.172915	0.148745	0.135452	0.119137	0.157326	0.175332	0.215092	0.0977462	0.09545	0.113215	0.185605	0.250743	0.148866	0.178354	0.270683	0.101009	0.139681	0.255577	0.238054	0.0570196	0.196481	0.103547	0.13243	0.110315	0.205545	0.107414	0.110073	0.144274
cg00751288	0.0338337	0.0293962	0.025123	0.034902	0.0369564	0.0234795	0.027424	0.0436126	0.0506797	0.0199459	0.0224934	0.0356415	0.0289853	0.0365455	0.0195351	0.0298071	0.0351485	0.0324367	0.0287388	0.0250409	0.027917	0.0351485	0.0275061	0.0501867	0.0279992	0.0367098	0.0278348	0.0247943	0.0226578	0.0291496	0.0211786	0.0192885	0.0255339	0.033505	0.0280814	0.0208499	0.0250409	0.027917	0.0418047	0.0468996	0.0429552	0.0286566	0.0304645	0.0404899	0.0197816	0.0259448	0.0281088	0.043777	0.0287388
cg00754617	0.843096	0.859649	0.743566	0.881898	0.753669	0.863518	0.886949	0.897375	0.828586	0.912746	0.855672	0.765493	0.90318	0.93306	0.89931	0.894581	0.875556	0.913498	0.894151	0.854489	0.771082	0.9006	0.897483	0.866313	0.928116	0.893291	0.844601	0.855349	0.93048	0.816547	0.922204	0.88609	0.757109	0.871149	0.897913	0.871579	0.806229	0.907156	0.853737	0.873514	0.93177	0.792041	0.901245	0.899095	0.861368	0.825684	0.877383	0.910703	0.902535
cg00755043	0.0131854	0.231766	0.313746	0.353498	0.674296	0.623806	0.446629	0.437543	0.233315	0.709917	0.253655	0.122011	0.754624	0.0402369	0.0310476	0.0394109	0.0316671	0.756689	0.349574	0.308687	0.0702827	0.0356939	0.68493	0.319012	0.0337321	0.629278	0.377142	0.258611	0.0538659	0.48287	0.670475	0.0536594	0.191292	0.123043	0.54895	0.0438506	0.0445734	0.592212	0.187884	0.343999	0.676774	0.100019	0.0520074	0.525719	0.0672884	0.431142	0.246875	0.0368296	0.485348
cg00756058	0.602102	0.450009	0.575243	0.601347	0.0265219	0.666175	0.47676	0.469425	0.477839	0.697565	0.610192	0.458423	0.763795	0.0260904	0.651613	0.0272769	0.0302972	0.435771	0.555719	0.0701003	0.0263061	0.807589	0.680629	0.0287871	0.367275	0.553993	0.640934	0.282167	0.425739	0.0268455	0.686131	0.0238252	0.292846	0.673079	0.577292	0.15456	0.413873	0.596709	0.517534	0.599405	0.767139	0.0297579	0.696594	0.458207	0.41808	0.509444	0.50308	0.625617	0.502648
cg00756887	0.333989	0.728431	0.355181	0.562802	0.301664	0.51827	0.612999	0.517001	0.486629	0.417975	0.483992	0.846304	0.552451	0.421393	0.333599	0.628429	0.483895	0.891325	0.519247	0.468172	0.626671	0.48575	0.497079	0.574717	0.59503	0.557138	0.435066	0.740833	0.655089	0.411237	0.547275	0.522763	0.709583	0.622765	0.579014	0.611241	0.401569	0.559189	0.63712	0.557627	0.464461	0.754896	0.32979	0.486531	0.625401	0.547958	0.591839	0.398053	0.62169
cg00757070	0.206053	0.366361	0.255557	0.308542	0.258264	0.238153	0.430562	0.285047	0.272477	0.187295	0.330103	0.541077	0.411515	0.137791	0.175499	0.204215	0.22539	0.40639	0.196964	0.342189	0.314343	0.423504	0.180237	0.222006	0.335131	0.246855	0.246178	0.334454	0.154421	0.160609	0.134987	0.323045	0.422441	0.21079	0.299067	0.366845	0.183524	0.198801	0.30129	0.276055	0.113909	0.34451	0.170278	0.183814	0.229451	0.284177	0.135889	0.175402	0.22539
cg00757952	0.806962	0.743023	0.395444	0.624542	0.579498	0.298106	0.813805	0.797361	0.751603	0.670811	0.659065	0.712279	0.552942	0.888673	0.734648	0.5748	0.712586	0.816052	0.650485	0.638535	0.413318	0.729949	0.395444	0.684702	0.779384	0.32793	0.38666	0.518624	0.859155	0.712483	0.16175	0.77632	0.615758	0.635675	0.750173	0.773563	0.626278	0.62924	0.668666	0.792765	0.79205	0.800936	0.812069	0.345702	0.740674	0.51321	0.829807	0.690013	0.666317
cg00761755	0.0226407	0.0285099	0.0134918	0.0342064	0.0215187	0.020224	0.0281646	0.0171168	0.043528	0.036882	0.037141	0.0412839	0.0164264	0.0258342	0.0240217	0.0155633	0.0184978	0.0234175	0.0188431	0.0302361	0.0348969	0.0164264	0.0247985	0.0380904	0.0356737	0.0329117	0.0157359	0.0361052	0.0225544	0.0281646	0.0276468	0.0250574	0.0327391	0.0199651	0.0232449	0.0261795	0.0227271	0.0380041	0.0373999	0.0222092	0.0246259	0.0290277	0.0168579	0.0181526	0.0353284	0.0301498	0.0249999	0.0167716	0.0316171
cg00762512	0.0310987	0.0571329	0.0385747	0.0449953	0.0376072	0.0442917	0.0348806	0.0388386	0.0411253	0.039806	0.0400699	0.0589799	0.055022	0.0545822	0.0344409	0.0471941	0.0362	0.0350566	0.0350566	0.0451712	0.0915227	0.0413892	0.0310987	0.0437639	0.0452592	0.0391904	0.0309227	0.0346168	0.0365518	0.0336493	0.0392783	0.0621462	0.0355843	0.0555497	0.0292516	0.0392783	0.0428844	0.0354963	0.0544943	0.03233	0.0515918	0.041829	0.0258214	0.0444676	0.0331216	0.0488653	0.0514159	0.0294275	0.0385747
cg00763679	0.0456028	0.0508851	0.038361	0.0489256	0.0444953	0.0298411	0.0466252	0.0400649	0.0481588	0.0549747	0.0412577	0.0491812	0.0410873	0.047818	0.0422801	0.0513111	0.0547191	0.0329935	0.0444953	0.037509	0.0557415	0.0335047	0.0569342	0.0556563	0.0561675	0.0435581	0.0447509	0.0502036	0.034953	0.0298411	0.0519927	0.0350382	0.0438137	0.0476476	0.0431321	0.0438989	0.038787	0.0657949	0.0428765	0.0531003	0.0352938	0.038787	0.0410873	0.0480736	0.0387018	0.0480736	0.0441545	0.0323971	0.0474772
cg00763889	0.878514	0.925321	0.921746	0.933587	0.908117	0.823105	0.937274	0.942301	0.917054	0.946546	0.915714	0.814726	0.79015	0.915267	0.923869	0.945206	0.684694	0.913926	0.914485	0.927667	0.921746	0.887451	0.905995	0.914038	0.935487	0.938503	0.941296	0.917389	0.892924	0.822211	0.932582	0.772052	0.899404	0.892701	0.919065	0.914932	0.855166	0.923087	0.937051	0.913703	0.907335	0.918618	0.929901	0.92856	0.915267	0.917389	0.917911	0.821094	0.909011
cg00766729	0.0479591	0.0501907	0.0628828	0.0338723	0.0443328	0.0409855	0.0321986	0.0231329	0.0312223	0.0637196	0.0287118	0.0630223	0.0402881	0.014346	0.0861749	0.0344302	0.0193671	0.027875	0.0255039	0.0359644	0.0291302	0.0190881	0.0239697	0.0493539	0.0195065	0.0189487	0.0528407	0.0301065	0.0305249	0.0137881	0.0725065	0.0111381	0.0234118	0.0348486	0.0305249	0.0284328	0.0476802	0.0270381	0.0592565	0.0317802	0.0365223	0.0874301	0.0259223	0.0515854	0.0354065	0.0457276	0.0283399	0.00667499	0.0499118
cg00766889	0.041426	0.0497511	0.065224	0.0511807	0.0420147	0.0460511	0.052442	0.0427715	0.0600944	0.0428556	0.0499193	0.0526102	0.0420147	0.0398283	0.0421828	0.0464715	0.0369691	0.0495829	0.0579921	0.0500875	0.0591694	0.0399124	0.0568148	0.0589171	0.0485738	0.0568148	0.0374737	0.0573194	0.0489943	0.0351191	0.057908	0.0275509	0.051517	0.0475647	0.0489102	0.045042	0.0530307	0.0680831	0.060683	0.0445374	0.0502556	0.0477329	0.0474806	0.0536193	0.0501716	0.0494988	0.0549648	0.0286441	0.0537034
cg00767581	0.155643	0.682625	0.272581	0.427774	0.397779	0.685668	0.606876	0.909981	0.650022	0.879225	0.613506	0.589379	0.849773	0.776741	0.797716	0.55808	0.36148	0.420601	0.763591	0.742507	0.321378	0.772503	0.598073	0.672736	0.41169	0.823582	0.425601	0.387998	0.662955	0.719467	0.786087	0.502328	0.648283	0.565687	0.694797	0.583402	0.403756	0.246933	0.72251	0.666867	0.672192	0.583619	0.376586	0.291926	0.435816	0.717403	0.695739	0.782827	0.708926
cg00768439	0.595309	0.325564	0.555089	0.58587	0.61306	0.633478	0.435658	0.612342	0.419549	0.716177	0.579919	0.221832	0.616959	0.112662	0.685088	0.551292	0.599106	0.765632	0.633888	0.397387	0.503069	0.792821	0.755679	0.61778	0.745726	0.611316	0.62291	0.537338	0.0797258	0.614291	0.685498	0.604441	0.270877	0.635222	0.552524	0.391744	0.271595	0.542776	0.529233	0.107839	0.897888	0.137492	0.550574	0.0718254	0.496092	0.475058	0.749933	0.422627	0.519998
cg00769470	0.738043	0.775636	0.540707	0.607862	0.870232	0.575623	0.851603	0.775078	0.861977	0.939841	0.885738	0.757118	0.881945	0.492852	0.789692	0.914072	0.912622	0.925339	0.567257	0.919203	0.751541	0.755334	0.871682	0.71841	0.644005	0.700673	0.556994	0.751206	0.93694	0.835539	0.60195	0.849372	0.902136	0.824273	0.714506	0.87079	0.593583	0.551528	0.578635	0.861085	0.595814	0.913849	0.777198	0.862423	0.669662	0.817022	0.890795	0.710267	0.632849
cg00769520	0.0455724	0.0444733	0.0507386	0.419621	0.0351303	0.592411	0.034251	0.0335915	0.0362295	0.142959	0.0330419	0.20814	0.738052	0.10251	0.0763493	0.0391972	0.034141	0.0348005	0.241665	0.0651377	0.0477708	0.0798667	0.663748	0.0444733	0.0373286	0.294755	0.480955	0.11493	0.0274361	0.0797567	0.704747	0.0293047	0.193082	0.119437	0.498102	0.0316129	0.0245782	0.0483204	0.0673361	0.0304038	0.0353501	0.0473311	0.0553551	0.0352402	0.0294146	0.277828	0.0685452	0.0638187	0.036889
cg00770279	0.0278459	0.0233911	0.02171	0.0226346	0.0202811	0.0218781	0.0207854	0.0166668	0.0259967	0.0238113	0.0195246	0.0254924	0.0243157	0.0323848	0.0190203	0.0209535	0.0182638	0.0203652	0.0195246	0.0205333	0.0228027	0.0218781	0.0187682	0.0229708	0.0231389	0.0286864	0.0278459	0.0246519	0.0157422	0.0159103	0.0190203	0.0279299	0.020113	0.0214578	0.0284343	0.0201971	0.0214578	0.0211216	0.0291067	0.0184319	0.0260808	0.0193565	0.0187682	0.0275937	0.0186841	0.0191884	0.0299752	0.0227186	0.0258286
cg00770871	0.0316092	0.0114865	0.0144742	0.011838	0.015265	0.0119259	0.0120138	0.0157044	0.0170225	0.0138591	0.012541	0.0140348	0.0107836	0.0143863	0.0107836	0.0141227	0.0149135	0.0121895	0.0120138	0.0126289	0.0135955	0.0121016	0.0123652	0.014562	0.0130682	0.0129803	0.0129803	0.0140348	0.00885037	0.0115744	0.0122774	0.0130682	0.0113108	0.015968	0.0138591	0.00990483	0.0123652	0.0142106	0.0143863	0.0112229	0.0171982	0.0133318	0.013244	0.0139469	0.0105199	0.0130682	0.0140934	0.0122774	0.0142106
cg00772000	0.415967	0.152456	0.111835	0.099614	0.0912338	0.631524	0.10427	0.0762193	0.0983337	0.0565491	0.119284	0.201224	0.842309	0.0688866	0.113465	0.171893	0.0709817	0.080293	0.117771	0.0993812	0.153736	0.0667916	0.0920485	0.105783	0.074357	0.7123	0.214609	0.354628	0.0900699	0.0328052	0.848711	0.0741242	0.272223	0.10846	0.687043	0.206694	0.0652785	0.0700505	0.620816	0.0984501	0.426093	0.158159	0.0752881	0.0793619	0.09426	0.480564	0.0963938	0.0527082	0.126384
cg00775197	0.0397012	0.238963	0.135694	0.113066	0.443608	0.682444	0.040399	0.823791	0.156826	0.534617	0.0801717	0.170682	0.719525	0.0927315	0.0646214	0.222815	0.335056	0.0411964	0.089741	0.400048	0.122137	0.0514636	0.526244	0.221619	0.0912362	0.636989	0.444705	0.150746	0.319705	0.0772809	0.688823	0.0720975	0.290498	0.233082	0.616654	0.25551	0.133401	0.0538559	0.318309	0.0672131	0.0857538	0.240758	0.0932299	0.077879	0.0462801	0.488863	0.0818662	0.0305306	0.393768
cg00777121	0.0688099	0.0598582	0.589649	0.0466489	0.0294004	0.489543	0.387689	0.483975	0.07274	0.0357321	0.238238	0.105054	0.4164	0.0661899	0.0240512	0.094901	0.0383521	0.0409722	0.0476314	0.0478497	0.0643341	0.425898	0.0445747	0.0620415	0.202213	0.0467581	0.037588	0.591614	0.0477406	0.0475222	0.0594215	0.038898	0.0552731	0.0326754	0.0250337	0.0439197	0.0559281	0.0607315	0.0793992	0.375244	0.511049	0.0507973	0.0370421	0.0444655	0.101669	0.243915	0.0614229	0.276665	0.0624782
cg00777555	0.0456711	0.0459978	0.0268864	0.043711	0.0237012	0.0232111	0.038974	0.0345636	0.0419142	0.0453445	0.0278665	0.0448544	0.0213327	0.0437927	0.035462	0.0227211	0.0246812	0.0294183	0.0294183	0.0412608	0.0485297	0.0232111	0.0275398	0.0423226	0.0408524	0.039954	0.0186375	0.0468146	0.0384839	0.0476313	0.034482	0.0315418	0.0316234	0.0271314	0.030235	0.0430576	0.0377489	0.0433026	0.0605356	0.0185558	0.0234562	0.0469779	0.0169223	0.0201892	0.0312151	0.0357071	0.0287921	0.0191275	0.0493464
cg00778920	0.0492815	0.116224	0.0732071	0.0874641	0.0559184	0.0886931	0.121878	0.0993449	0.117699	0.109341	0.156209	0.144082	0.0519854	0.0733709	0.0808272	0.0624733	0.0589501	0.103032	0.0662424	0.0803356	0.0745181	0.0930358	0.116142	0.115486	0.0990991	0.0885293	0.0554268	0.136954	0.255271	0.0870544	0.0495273	0.0727154	0.0800898	0.0570655	0.0514119	0.078451	0.0794343	0.102868	0.10803	0.107211	0.086235	0.0725516	0.0514938	0.0877099	0.0658328	0.0803356	0.0913697	0.0709128	0.117371
cg00779924	0.373656	0.225016	0.394397	0.383293	0.0946021	0.750442	0.423936	0.498099	0.345583	0.744995	0.30934	0.310597	0.861058	0.480606	0.454314	0.0512356	0.680574	0.393978	0.201133	0.410738	0.0476741	0.119428	0.873	0.319186	0.828795	0.748138	0.553931	0.0844414	0.0361516	0.836966	0.819263	0.402463	0.194115	0.413252	0.65491	0.326205	0.304836	0.104449	0.677851	0.495481	0.727397	0.113248	0.0676814	0.500404	0.0445316	0.603792	0.53752	0.50208	0.119742
cg00782174	0.0403392	0.0400582	0.0348117	0.0456793	0.0358423	0.026661	0.0404329	0.0346244	0.0425877	0.0449299	0.0271295	0.0345307	0.040714	0.044274	0.0631987	0.0358423	0.045492	0.0286284	0.0421193	0.0379034	0.0418382	0.0496142	0.0319075	0.0360297	0.0324696	0.0388402	0.0434309	0.0380908	0.0249747	0.031439	0.0334064	0.0360297	0.0272231	0.0447425	0.0295653	0.0268484	0.032938	0.0414635	0.0443677	0.0534553	0.0492394	0.0411824	0.0417445	0.0297527	0.0324696	0.0306895	0.0453046	0.0398708	0.0353739
cg00782854	0.0522645	0.0375422	0.033183	0.0443687	0.033841	0.0538273	0.0340055	0.052429	0.0439575	0.0569527	0.0349102	0.0432995	0.0393516	0.0517711	0.022244	0.0373777	0.0307156	0.0519356	0.0334298	0.0316203	0.0398451	0.0389404	0.0397629	0.044451	0.054074	0.0541562	0.0318671	0.0576107	0.0363907	0.0473297	0.0498794	0.0289884	0.0432173	0.0442042	0.0391871	0.0419836	0.0290706	0.0515243	0.0470829	0.0391871	0.0473297	0.0389404	0.0262742	0.0423948	0.0383646	0.0374599	0.0408047	0.0311268	0.0379534
cg00783759	0.0351077	0.0166998	0.0161662	0.0142099	0.0133206	0.0145656	0.0121645	0.0168777	0.0184783	0.0150991	0.014032	0.0161662	0.0151881	0.0143877	0.0153659	0.0120756	0.0162552	0.0135874	0.0133206	0.0166109	0.0157216	0.0169666	0.0148323	0.0158995	0.0120756	0.0168777	0.0151881	0.0142099	0.0130538	0.0134984	0.0114531	0.0112753	0.0109196	0.0167887	0.0129649	0.0153659	0.017678	0.0148323	0.0169666	0.0196344	0.0144766	0.0181226	0.015277	0.0194565	0.0119867	0.0105639	0.0182116	0.0146545	0.0166998
cg00784357	0.0514144	0.032599	0.0289178	0.0438882	0.0298176	0.0276089	0.0364439	0.0263818	0.0481421	0.0373438	0.0282633	0.0480603	0.0319446	0.0610674	0.0316174	0.0262182	0.0420067	0.0442155	0.0420067	0.0334989	0.0300631	0.0405342	0.0436428	0.0493692	0.0504327	0.0400434	0.0294086	0.0358713	0.037262	0.0276089	0.0392253	0.0357895	0.0370166	0.043561	0.043561	0.0343988	0.046097	0.0335807	0.0528051	0.0430702	0.0532141	0.042743	0.043152	0.045688	0.0411068	0.0394707	0.0350259	0.0280179	0.03808
cg00791249	0.0536969	0.066809	0.0545216	0.0565008	0.0628507	0.0536144	0.0467697	0.0599643	0.0773647	0.08289	0.0495736	0.0588923	0.0561709	0.0608715	0.0541917	0.043636	0.0445431	0.0616961	0.0460275	0.0582325	0.0682934	0.0587273	0.0602942	0.0776121	0.0503158	0.065737	0.052295	0.0786017	0.0461925	0.0414094	0.0579851	0.0553462	0.0569956	0.0528722	0.0580676	0.0542742	0.0621909	0.0734063	0.0757154	0.0513878	0.0715921	0.0513878	0.0401724	0.0582325	0.0467697	0.0441308	0.0438009	0.0400075	0.0627682
cg00792687	0.0469499	0.0648561	0.0385661	0.0411537	0.0202459	0.0594739	0.0268701	0.0187968	0.0228335	0.0535741	0.0254211	0.0593704	0.0242825	0.0350469	0.0291472	0.0301822	0.0184863	0.0175548	0.0269736	0.0298717	0.022523	0.0299752	0.062579	0.0276982	0.0276982	0.0491235	0.0464324	0.0424992	0.0121726	0.0179688	0.0321488	0.0232475	0.0203494	0.0308033	0.0353574	0.036496	0.0256281	0.0318383	0.0436378	0.0187968	0.0254211	0.0546092	0.0269736	0.0250071	0.0182793	0.0270771	0.0336669	0.0355645	0.0357715
cg00792740	0.0623376	0.0312782	0.0622355	0.0330151	0.0285196	0.0337302	0.0274979	0.0319934	0.0333216	0.0338324	0.0304608	0.0338324	0.024535	0.0375105	0.0250458	0.0354671	0.0229003	0.0279066	0.0310738	0.0249437	0.0375105	0.0333216	0.0244328	0.0381235	0.03843	0.0349563	0.0328107	0.0346498	0.0280088	0.0332194	0.0255567	0.0388387	0.0188135	0.0414951	0.0356715	0.0282131	0.025761	0.042619	0.0382257	0.0373062	0.0357736	0.0297456	0.025761	0.036591	0.0244328	0.0303587	0.0446624	0.0274979	0.0439472
cg00792849	0.339054	0.470783	0.607018	0.605216	0.644154	0.668879	0.551263	0.722832	0.500713	0.707416	0.512725	0.474387	0.742751	0.793001	0.739548	0.639049	0.63024	0.768477	0.642152	0.47789	0.41693	0.755364	0.725234	0.61943	0.717426	0.620531	0.585296	0.571983	0.760969	0.713723	0.66037	0.62964	0.316632	0.624435	0.55827	0.50812	0.636146	0.520132	0.540852	0.475188	0.839947	0.402216	0.636246	0.673683	0.613224	0.588499	0.559204	0.710219	0.414728
cg00793774	0.052222	0.044465	0.0307666	0.0553577	0.0638574	0.0400089	0.0476833	0.0532947	0.0591537	0.062372	0.0428146	0.0547801	0.0413292	0.0401739	0.0512317	0.0438049	0.0367081	0.0524695	0.0443825	0.0519744	0.0412467	0.040339	0.0374508	0.0470232	0.0439699	0.0371207	0.0485085	0.0534598	0.0466106	0.0220194	0.0431447	0.032582	0.0358829	0.0461154	0.0606391	0.0404215	0.0473532	0.0410817	0.0664155	0.0386886	0.0527171	0.0520569	0.0511492	0.0487561	0.0404215	0.0323345	0.0528546	0.0353877	0.0464455
cg00795268	0.943883	0.946051	0.949085	0.963391	0.944317	0.959056	0.951513	0.955674	0.928017	0.953767	0.950732	0.956628	0.950906	0.910851	0.941976	0.950993	0.94449	0.950126	0.887268	0.946744	0.94345	0.950906	0.935647	0.941456	0.948392	0.945444	0.924029	0.95368	0.953767	0.932612	0.943016	0.946831	0.953507	0.936254	0.938595	0.953333	0.955067	0.924463	0.958449	0.953767	0.957755	0.953333	0.948565	0.934606	0.950646	0.951079	0.940791	0.950472	0.940762
cg00796728	0.0217192	0.075706	0.0539371	0.0418336	0.0246797	0.0408758	0.0552433	0.0336485	0.0417465	0.0458391	0.0340839	0.0739645	0.0315587	0.0419207	0.0382635	0.0333873	0.0280757	0.0366091	0.0324295	0.0461003	0.0416595	0.0360866	0.0719618	0.0394826	0.069872	0.0439234	0.0291206	0.0434881	0.0209355	0.0253763	0.0252893	0.0385247	0.0690012	0.02616	0.0773605	0.0548079	0.0481901	0.0361737	0.0518473	0.0325165	0.0351288	0.0474065	0.0272049	0.0238961	0.0433139	0.0404404	0.0475226	0.0320812	0.0555916
cg00798206	0.142583	0.0405028	0.0339724	0.0452001	0.0313373	0.0345452	0.0242341	0.0462312	0.032483	0.0400445	0.0279003	0.0458875	0.0306499	0.0437107	0.0293897	0.0314519	0.0303062	0.0360346	0.0360346	0.0550529	0.0477206	0.0248069	0.0289314	0.0317956	0.0338578	0.0403882	0.0445127	0.0394717	0.0281294	0.0285877	0.0283585	0.0348889	0.0201096	0.0304208	0.020797	0.0311082	0.034087	0.0338578	0.0498974	0.0321393	0.0285877	0.031681	0.0401591	0.0323684	0.0269837	0.0253798	0.0540218	0.0280148	0.0322539
cg00800095	0.72519	0.878035	0.894053	0.915282	0.934581	0.890194	0.930238	0.928212	0.902352	0.949537	0.837991	0.879386	0.986976	0.980415	0.969029	0.933519	0.906598	0.953397	0.908141	0.947607	0.919528	0.922712	0.952046	0.77556	0.926379	0.87765	0.946835	0.942107	0.946642	0.919142	0.89801	0.773823	0.75877	0.880062	0.924545	0.810973	0.753077	0.804025	0.900229	0.862597	0.952818	0.934098	0.87157	0.935739	0.906887	0.855456	0.939663	0.888167	0.911519
cg00804048	0.0955237	0.0225081	0.0287355	0.0232866	0.0246877	0.0226638	0.0204843	0.0264002	0.0343401	0.0257775	0.0212627	0.0218854	0.0264002	0.0372981	0.0218854	0.0276457	0.0382322	0.0293582	0.0383879	0.0271787	0.030448	0.0256218	0.0265559	0.0372981	0.0348071	0.0307594	0.0239093	0.0287355	0.0399447	0.0402561	0.0225081	0.0492857	0.0197058	0.0488187	0.0429027	0.0203286	0.0326276	0.0408788	0.0386992	0.0282684	0.024532	0.0218854	0.0343401	0.0357412	0.0212627	0.0260889	0.0443038	0.0411902	0.0284241
cg00804392	0.340181	0.54506	0.659436	0.734455	0.697595	0.684609	0.717573	0.783502	0.715775	0.823359	0.63726	0.344476	0.828853	0.903772	0.791194	0.699793	0.700891	0.81347	0.790195	0.605894	0.524082	0.808975	0.846135	0.723767	0.831451	0.672722	0.704687	0.624973	0.786699	0.82226	0.830152	0.68371	0.444768	0.692201	0.608491	0.541364	0.739849	0.372446	0.701691	0.669026	0.852528	0.349471	0.797088	0.780106	0.762025	0.646051	0.821861	0.787498	0.688705
cg00806490	0.0373696	0.458282	0.603454	0.673954	0.40656	0.682849	0.519997	0.435002	0.333315	0.754886	0.599172	0.31289	0.75818	0.0431896	0.564251	0.0920563	0.460258	0.619157	0.501438	0.434782	0.334303	0.27182	0.722931	0.137629	0.520655	0.595767	0.638265	0.241951	0.102489	0.653749	0.71722	0.555905	0.319918	0.586543	0.629919	0.431817	0.528672	0.424789	0.435002	0.585225	0.896105	0.371859	0.417322	0.403156	0.522742	0.492214	0.625161	0.108638	0.491665
cg00807586	0.0339937	0.0450155	0.48629	0.029039	0.019534	0.585689	0.212263	0.320964	0.0294435	0.0350049	0.0208485	0.0286345	0.500143	0.0191295	0.0149837	0.0202418	0.0253988	0.0226686	0.0278256	0.02641	0.151896	0.0646322	0.0179161	0.02732	0.470516	0.02732	0.0916305	0.0502736	0.0461278	0.015186	0.23552	0.0387462	0.0786875	0.186276	0.485785	0.0349038	0.0148826	0.0350049	0.0312636	0.228442	0.0999221	0.0310613	0.106292	0.0248932	0.02732	0.10336	0.022399	0.0269155	0.0306569
cg00808492	0.856794	0.594015	0.476116	0.645866	0.335867	0.258141	0.687346	0.365971	0.395571	0.291668	0.635797	0.8134	0.154439	0.454671	0.198537	0.294185	0.336672	0.883072	0.364763	0.598545	0.468565	0.474103	0.149002	0.333753	0.586766	0.302843	0.263175	0.338082	0.571764	0.121012	0.0870827	0.601163	0.74101	0.559984	0.402518	0.606902	0.344324	0.332041	0.490111	0.609822	0.76024	0.870486	0.562199	0.149405	0.413795	0.397887	0.219815	0.675667	0.76467
cg00810495	0.0441447	0.0617851	0.0382125	0.0866066	0.0266603	0.0480474	0.0453935	0.0271287	0.0759911	0.0603801	0.0411786	0.0711517	0.0435202	0.0486719	0.0369636	0.0430519	0.0414908	0.0364953	0.0453935	0.0645951	0.0656879	0.0263481	0.0411786	0.0773961	0.0519502	0.0666245	0.0360269	0.0608484	0.0617851	0.054604	0.050233	0.0439885	0.0435202	0.0549163	0.0383686	0.0469546	0.0455496	0.0692784	0.0625657	0.0280653	0.0396175	0.050233	0.048828	0.0628779	0.0522624	0.0569457	0.0433121	0.061629	0.0636584
cg00811081	0.0769687	0.0253259	0.0242297	0.0291016	0.0317812	0.0267875	0.0273964	0.0265439	0.0351916	0.0309286	0.0308068	0.0242297	0.0226463	0.0245951	0.0422559	0.0339736	0.036775	0.0362878	0.0295888	0.0220373	0.0278836	0.0299542	0.0308068	0.0334864	0.0378712	0.028858	0.0310504	0.0232553	0.0254477	0.0295888	0.0263003	0.0448137	0.0249605	0.0371404	0.0429867	0.0310504	0.0253259	0.0359224	0.0270311	0.0432303	0.03373	0.0237425	0.0360442	0.0388456	0.0321466	0.029467	0.0325526	0.0350698	0.034339
cg00812502	0.0142963	0.0134392	0.0149392	0.016225	0.0142963	0.0119391	0.0130106	0.0165464	0.0216895	0.0159035	0.0107605	0.0151535	0.0118319	0.0151535	0.0138677	0.0112962	0.0121534	0.0127963	0.0149392	0.013332	0.017725	0.0107605	0.0127963	0.016975	0.0124748	0.0195466	0.0149392	0.015475	0.0094747	0.0094747	0.0148321	0.0121534	0.0116176	0.0186894	0.0123677	0.0127963	0.0134392	0.0208323	0.0161178	0.0136534	0.0157964	0.0171893	0.016225	0.0161178	0.0119391	0.0170822	0.0194751	0.0124748	0.0180465
cg00815440	0.0154769	0.0132473	0.0171491	0.0112965	0.0112965	0.00823086	0.00265698	0.00934563	0.0174278	0.0107391	0.00767347	0.00767347	0.00600131	0.00962433	0.00460784	0.00767347	0.00962433	0.0065587	0.0138047	0.00962433	0.0129687	0.00962433	0.0065587	0.0143621	0.00711608	0.0157556	0.00990302	0.0121326	0.00014874	0.00460784	0.00572261	0.0065587	0.00321437	0.0146408	0.0310837	0.00628	0.00906694	0.0146408	0.0140834	0.0115752	0.00823086	0.01269	0.00878825	0.0138047	0.00432915	0.00739478	0.0149195	0.00823086	0.0104604
cg00815583	0.0517323	0.0312501	0.0585213	0.0433323	0.0505816	0.0305597	0.0254967	0.0295241	0.153683	0.0475898	0.0309049	0.0833761	0.0449432	0.0526528	0.0370035	0.0164062	0.0425268	0.0452884	0.0489706	0.0366583	0.0586364	0.0281432	0.0503515	0.0391898	0.0284884	0.0538035	0.0403405	0.0670364	0.026072	0.0196282	0.0433323	0.0313652	0.0375789	0.0475898	0.0347021	0.0603624	0.0386145	0.0788885	0.052998	0.0223898	0.0298693	0.0390747	0.0310199	0.0429871	0.032861	0.0458638	0.0377706	0.0402254	0.113639
cg00816620	0.206925	0.268042	0.201408	0.258387	0.0949499	0.1696	0.176582	0.135378	0.278386	0.120034	0.178306	0.367087	0.231406	0.0824508	0.0750375	0.193219	0.150463	0.161066	0.235975	0.198305	0.248474	0.112966	0.17279	0.260801	0.153739	0.168652	0.216321	0.208735	0.172445	0.160204	0.187358	0.184082	0.209511	0.207011	0.219338	0.313556	0.181668	0.158825	0.229855	0.14805	0.0960706	0.337089	0.118655	0.0867608	0.251405	0.282696	0.19184	0.13512	0.152446
cg00818693	0.0465573	0.0602914	0.0957049	0.435766	0.0605184	0.0773171	0.261876	0.456991	0.0680097	0.0579078	0.0470113	0.0619939	0.711243	0.074366	0.0480328	0.0389524	0.0471248	0.0587023	0.0601779	0.0508704	0.0548431	0.0423576	0.227938	0.0623345	0.0539351	0.0543891	0.163354	0.165283	0.0371363	0.041563	0.0387254	0.0372498	0.168235	0.0487139	0.0800412	0.234976	0.0607454	0.0542756	0.0936618	0.0482598	0.0732309	0.0491679	0.0455357	0.0441737	0.0444007	0.0793602	0.0652099	0.040201	0.0380444
cg00818872	0.0572057	0.0489839	0.0395133	0.116839	0.0261919	0.03483	0.029106	0.0375359	0.0494002	0.265976	0.0308752	0.0737533	0.0355585	0.0268164	0.0530427	0.0308752	0.0311874	0.0771877	0.027753	0.0969615	0.040554	0.0147439	0.450497	0.0298345	0.0241105	0.0354544	0.112781	0.061993	0.0194272	0.033477	0.196663	0.0273367	0.063346	0.0383685	0.197392	0.0852013	0.0281693	0.0324363	0.047631	0.27118	0.0455495	0.11788	0.0316037	0.16669	0.0226535	0.29699	0.0631725	0.0172417	0.125165
cg00819310	0.746947	0.567592	0.443738	0.708087	0.353363	0.516974	0.554838	0.346288	0.356452	0.55713	0.808127	0.784711	0.793779	0.426201	0.409461	0.451609	0.820981	0.881762	0.699318	0.851471	0.609442	0.53192	0.647405	0.573272	0.743061	0.596488	0.486484	0.758705	0.640231	0.418329	0.228611	0.850873	0.85456	0.468249	0.774149	0.700514	0.587122	0.750235	0.753922	0.477516	0.353163	0.772754	0.78521	0.421019	0.495651	0.491067	0.24017	0.791686	0.850276
cg00819362	0.909397	0.929565	0.913808	0.943612	0.922632	0.923893	0.930106	0.938479	0.905525	0.957478	0.931546	0.910027	0.93902	0.935868	0.918491	0.919571	0.936678	0.945412	0.913178	0.91633	0.922902	0.933257	0.946403	0.925604	0.951985	0.933617	0.919931	0.950905	0.947753	0.934698	0.936949	0.944242	0.892829	0.915789	0.930376	0.905345	0.934247	0.942801	0.942171	0.924973	0.942441	0.923173	0.942171	0.920471	0.922632	0.941901	0.933767	0.945142	0.932807
cg00819696	0.0183273	0.0124456	0.0152622	0.0271913	0.0109544	0.0107059	0.0127769	0.0111201	0.0203983	0.0147651	0.014848	0.0125284	0.0122799	0.0133568	0.0118657	0.0126941	0.0121142	0.0111201	0.0122799	0.0121971	0.0180788	0.0123627	0.0135225	0.0166705	0.0141852	0.015345	0.0152622	0.0156764	0.00996035	0.0118657	0.0115343	0.0155107	0.0131912	0.0175817	0.0140196	0.0125284	0.0143509	0.0173332	0.0152622	0.016919	0.0179131	0.0155936	0.0128598	0.0150965	0.0121142	0.0133568	0.0149032	0.0140196	0.016919
cg00821764	0.0307417	0.0324269	0.024422	0.0233266	0.0277925	0.0251804	0.0210516	0.0218942	0.0275397	0.0272869	0.0494477	0.0320898	0.0335223	0.0230739	0.0273712	0.0219785	0.0240007	0.0265286	0.0229896	0.0229896	0.0273712	0.0266128	0.0179339	0.0310787	0.0241693	0.0274555	0.0261073	0.0290564	0.0226526	0.0254332	0.0341121	0.0243378	0.0154903	0.0298148	0.0315	0.020546	0.0330167	0.0310787	0.0243378	0.0301518	0.0320056	0.0268656	0.0268656	0.0259387	0.0174283	0.020546	0.0369208	0.0256017	0.0304889
cg00822607	0.0549649	0.0452727	0.0379763	0.074676	0.029482	0.0427679	0.0507177	0.0470151	0.0744582	0.0616078	0.0439658	0.0686864	0.0413522	0.0363428	0.0654194	0.0531136	0.0417878	0.0531136	0.055945	0.0506088	0.0565984	0.0704288	0.0522423	0.0600832	0.0408077	0.0806656	0.0435302	0.0586675	0.0461439	0.0470151	0.044946	0.0463617	0.0401543	0.038303	0.0452727	0.0422234	0.0682508	0.0588853	0.0512622	0.0522423	0.0364517	0.0523512	0.0515889	0.0610633	0.0459261	0.0414611	0.065129	0.0425501	0.0677063
cg00824109	0.017115	0.016936	0.0189045	0.0182782	0.0173834	0.0157728	0.014699	0.014699	0.0245417	0.0219468	0.0215889	0.0163096	0.012641	0.0188151	0.0182782	0.0240049	0.0248102	0.0175624	0.0222153	0.018994	0.0215889	0.0155938	0.0213205	0.0219468	0.0203362	0.0194414	0.0189045	0.0200678	0.0136253	0.0184571	0.0155938	0.0197993	0.0161307	0.0315211	0.0198888	0.0176518	0.021052	0.0202467	0.0195309	0.0223942	0.0186361	0.0170255	0.0236469	0.0252576	0.0174729	0.018994	0.0229908	0.0184571	0.0222153
cg00826384	0.653541	0.259953	0.189662	0.388163	0.0778791	0.260807	0.511252	0.0470534	0.313285	0.725005	0.0736125	0.139744	0.742925	0.0340405	0.433281	0.369603	0.0489733	0.648528	0.233714	0.510505	0.0761725	0.26198	0.765857	0.0661461	0.0863055	0.527145	0.392642	0.0519599	0.0621996	0.141237	0.336858	0.0612396	0.318831	0.422615	0.168116	0.0721193	0.04716	0.0886521	0.152863	0.57845	0.46848	0.114038	0.423575	0.0943052	0.0549465	0.509652	0.0660394	0.274993	0.226888
cg00827369	0.0324802	0.0548298	0.0345194	0.0455311	0.0335406	0.0408001	0.0314198	0.0385978	0.027423	0.0404739	0.0346826	0.0412896	0.0289728	0.0347641	0.0369665	0.0362323	0.0344378	0.0437366	0.0369665	0.0363955	0.0279124	0.0416974	0.0460205	0.0399845	0.0410448	0.040637	0.0286465	0.0433287	0.0433287	0.0390872	0.035172	0.0270152	0.0345194	0.0335406	0.0312567	0.0346826	0.034601	0.0475703	0.044797	0.0317461	0.0297885	0.0372112	0.036477	0.0379453	0.0292175	0.027994	0.035607	0.0191847	0.0496095
cg00828602	0.0663575	0.0440109	0.0421742	0.361353	0.0289091	0.731857	0.0430926	0.0333989	0.0459497	0.314415	0.0573781	0.174009	0.898385	0.0506435	0.524207	0.0296234	0.0368682	0.0635004	0.0627861	0.070235	0.0595209	0.0306438	0.739612	0.0407457	0.13605	0.0385008	0.602982	0.277681	0.0291132	0.0197256	0.850733	0.379618	0.213192	0.452372	0.704409	0.0361539	0.065031	0.360332	0.369006	0.0354396	0.0482966	0.0586025	0.0661534	0.463698	0.0249296	0.543901	0.0349975	0.038909	0.109316
cg00830029	0.466553	0.384792	0.449495	0.676777	0.338089	0.609251	0.542901	0.552783	0.449612	0.712892	0.562195	0.513021	0.826063	0.471494	0.247388	0.768536	0.274681	0.215155	0.292444	0.488434	0.570665	0.611015	0.188568	0.326443	0.377969	0.780183	0.741361	0.454789	0.423614	0.420673	0.622309	0.365499	0.58337	0.332089	0.507139	0.498551	0.230448	0.307502	0.639602	0.74689	0.872648	0.473258	0.258211	0.246447	0.469847	0.616192	0.267622	0.344089	0.493492
cg00830393	0.035012	0.0285807	0.0274114	0.0360838	0.0253651	0.0346222	0.0271191	0.0338426	0.0240984	0.0355966	0.0302373	0.0487514	0.0212725	0.0324784	0.0212725	0.0276063	0.0240009	0.0283858	0.0262421	0.0314066	0.0346222	0.0283858	0.0195186	0.0298475	0.0236112	0.0326733	0.0268268	0.0331605	0.0195186	0.0210776	0.0205904	0.0346222	0.0190313	0.0316989	0.0302373	0.0254626	0.0272165	0.0347196	0.042515	0.0253651	0.0250728	0.0390071	0.0278986	0.0291654	0.0233188	0.0278012	0.0283209	0.0290679	0.0283858
cg00831028	0.0552578	0.0434125	0.0565305	0.0599568	0.0431188	0.0434125	0.0542789	0.0475241	0.0735643	0.0510483	0.0566284	0.0864866	0.0432167	0.0482093	0.0402798	0.0359724	0.0556494	0.0452725	0.0565305	0.0575094	0.061719	0.0448809	0.0507546	0.0549641	0.0671032	0.0519294	0.0411608	0.0611316	0.0512441	0.044783	0.0483072	0.0465451	0.0569221	0.0601526	0.0502652	0.0411608	0.0499715	0.0598589	0.0791444	0.0417482	0.0479157	0.0587821	0.0450767	0.0536915	0.0596631	0.0467409	0.0435756	0.0473283	0.0551599
cg00832517	0.0908739	0.057623	0.0731455	0.0593387	0.051414	0.0582766	0.0593387	0.0715933	0.0729822	0.0800898	0.0768219	0.0709397	0.0556623	0.0744527	0.0446331	0.120694	0.111298	0.068979	0.0757599	0.0661196	0.0671816	0.0554172	0.0675901	0.065466	0.061953	0.0834394	0.0791912	0.0629333	0.0574596	0.0432442	0.051414	0.0778023	0.0477376	0.0900569	0.047901	0.0598288	0.0697142	0.0769036	0.0733089	0.0693875	0.0579498	0.0684071	0.0828676	0.087606	0.0466755	0.0604824	0.0913369	0.0644856	0.0729005
cg00833393	0.14506	0.0283556	0.0403972	0.0459231	0.0274484	0.0283556	0.0350362	0.0666246	0.0357785	0.0371806	0.0476551	0.0728928	0.0250566	0.0224174	0.0333867	0.0307475	0.0336341	0.0336341	0.0299227	0.0301701	0.0389126	0.0455107	0.0403972	0.0457581	0.046253	0.028768	0.0373456	0.042789	0.0365208	0.0421292	0.0301701	0.0385827	0.033964	0.0337166	0.0713258	0.0399023	0.0296753	0.0380878	0.0502943	0.0338815	0.0324795	0.0385827	0.0328918	0.0295928	0.030665	0.0356136	0.0250841	0.022005	0.0463355
cg00833777	0.436742	0.473173	0.244132	0.299782	0.649732	0.613935	0.730937	0.742447	0.415411	0.765045	0.538749	0.422698	0.770536	0.691021	0.579299	0.671908	0.271165	0.495243	0.462613	0.482466	0.490702	0.426605	0.481515	0.375918	0.435897	0.524177	0.416784	0.694928	0.838329	0.586585	0.494398	0.378135	0.555434	0.435475	0.539594	0.476869	0.209285	0.360817	0.3303	0.455433	0.696934	0.324809	0.328293	0.478664	0.50612	0.534948	0.218648	0.5397	0.635582
cg00834796	0.0755453	0.0428541	0.0244155	0.0360767	0.307872	0.0395651	0.0531199	0.522258	0.0937846	0.387806	0.0547146	0.0547146	0.115213	0.0293989	0.0408608	0.100662	0.0372727	0.0378707	0.0511266	0.103951	0.183984	0.387008	0.136642	0.0530203	0.23023	0.0406614	0.036276	0.0888012	0.0474389	0.0278042	0.0547146	0.054914	0.118203	0.158768	0.0390667	0.0644821	0.034183	0.055811	0.0904955	0.0533193	0.0414588	0.13435	0.0404621	0.0948809	0.0478375	0.117705	0.0331863	0.0505286	0.0629871
cg00834958	0.191602	0.0294391	0.0314432	0.0350338	0.0297731	0.0333637	0.0268505	0.0440521	0.0382904	0.0368709	0.0355348	0.0301071	0.0356183	0.0297731	0.0230094	0.0333637	0.0399605	0.0407955	0.0337812	0.0412965	0.0386244	0.0352008	0.0261825	0.0438016	0.0363698	0.0440521	0.0304411	0.0377059	0.0339483	0.0295226	0.0270175	0.0320277	0.0298566	0.0298566	0.0406285	0.0292721	0.0311092	0.0342823	0.0387079	0.025097	0.0326122	0.0358688	0.0266	0.0299401	0.0305246	0.0332802	0.03264	0.0391254	0.0397935
cg00836605	0.0331623	0.0413689	0.0319613	0.110425	0.0266571	0.0263568	0.0223536	0.026557	0.0427701	0.0366651	0.0490752	0.0482745	0.0297596	0.020452	0.0417693	0.0243552	0.0255562	0.0319613	0.0345634	0.0341631	0.0479743	0.0408685	0.478422	0.0618855	0.0412689	0.0333625	0.0383665	0.0400679	0.0248556	0.0334626	0.0310606	0.0249557	0.0466732	0.0299597	0.0482745	0.0310606	0.0309605	0.0508766	0.0600841	0.0316611	0.029059	0.0286587	0.0305602	0.0275578	0.0565812	0.0332624	0.0300264	0.0200517	0.0345634
cg00838150	0.0322871	0.0496684	0.0313359	0.0440476	0.0212185	0.0408481	0.0373891	0.0224291	0.0476795	0.0340166	0.0405886	0.0354002	0.0306441	0.0328925	0.0258881	0.0418857	0.0309036	0.0215644	0.0339301	0.0409345	0.0390321	0.0228615	0.0294335	0.0356596	0.0398104	0.0450853	0.0406751	0.0483713	0.0325466	0.0341896	0.0214779	0.0533003	0.034449	0.037735	0.0258881	0.0417993	0.0398104	0.0429234	0.0392915	0.0366973	0.0283958	0.0574511	0.0296065	0.0275311	0.0312495	0.0392915	0.0281652	0.0198349	0.041021
cg00839584	0.839392	0.219497	0.225852	0.166058	0.172798	0.193307	0.339663	0.130336	0.432099	0.13024	0.156141	0.444809	0.801551	0.134476	0.117337	0.74609	0.102316	0.10068	0.150171	0.246073	0.452415	0.365853	0.183294	0.183871	0.40225	0.16394	0.151904	0.334656	0.101354	0.0544619	0.492278	0.220075	0.336871	0.237214	0.253679	0.274092	0.130047	0.124462	0.326183	0.13255	0.295275	0.394258	0.18002	0.0851774	0.118974	0.207173	0.0741044	0.229415	0.274477
cg00839802	0.0193471	0.0215225	0.0194507	0.0206938	0.0182076	0.020383	0.0191399	0.0205902	0.0225584	0.020901	0.0219369	0.0193471	0.0207974	0.0194507	0.0177933	0.0188292	0.0191399	0.016343	0.018622	0.0198651	0.020901	0.0196579	0.0177933	0.0228692	0.0176897	0.0202794	0.0188292	0.0219369	0.0146856	0.0162394	0.0222476	0.0233871	0.0161358	0.0219369	0.0216261	0.0204866	0.0183112	0.0219369	0.0199687	0.024941	0.0212117	0.0194507	0.0183112	0.0241122	0.0174825	0.0193471	0.0251827	0.0220404	0.022144
cg00840403	0.494971	0.161437	0.050072	0.108228	0.352241	0.0403637	0.513361	0.579639	0.65161	0.103467	0.542859	0.132032	0.366524	0.334132	0.0402704	0.610724	0.161717	0.338893	0.227061	0.156023	0.103841	0.504773	0.394342	0.0727557	0.565543	0.0952527	0.0280417	0.483863	0.550234	0.477795	0.38594	0.255159	0.05838	0.329931	0.044191	0.266174	0.30202	0.238729	0.475461	0.563396	0.780525	0.299686	0.284284	0.0388702	0.23929	0.26244	0.119897	0.44839	0.470047
cg00840516	0.332792	0.485778	0.383224	0.456733	0.423211	0.482197	0.420824	0.412866	0.38203	0.344331	0.491249	0.558292	0.713964	0.277586	0.328515	0.551827	0.333389	0.365717	0.356565	0.467873	0.628817	0.352189	0.454445	0.377454	0.368502	0.438132	0.544764	0.683427	0.274204	0.370292	0.694269	0.441514	0.503981	0.35577	0.629613	0.529446	0.31061	0.371785	0.478218	0.385014	0.545361	0.4817	0.30494	0.352388	0.469664	0.407992	0.270291	0.338163	0.397548
cg00841581	0.019884	0.0276972	0.0252931	0.0263234	0.02349	0.026581	0.0257224	0.0287275	0.0313891	0.0325911	0.026581	0.0333639	0.0266668	0.027182	0.0206567	0.0181668	0.0214294	0.0280406	0.025379	0.0295002	0.0275254	0.0349093	0.017995	0.0328487	0.0226315	0.0276972	0.0260658	0.0346518	0.0240911	0.0202274	0.0278689	0.0211718	0.0231466	0.0348235	0.017995	0.0282123	0.0263234	0.0273537	0.0370558	0.0252072	0.0249497	0.028985	0.0242628	0.0234042	0.0240052	0.0203991	0.032906	0.0188536	0.0333639
cg00842351	0.702436	0.525485	0.728319	0.8039	0.55711	0.606619	0.612925	0.848985	0.811148	0.901788	0.798441	0.435409	0.913741	0.914777	0.853691	0.768416	0.719848	0.848985	0.762768	0.631749	0.631467	0.889458	0.828466	0.733684	0.854915	0.731896	0.736979	0.78404	0.891434	0.918448	0.944896	0.485388	0.291966	0.819995	0.723896	0.470517	0.833549	0.83016	0.789688	0.761827	0.937649	0.553251	0.703565	0.915624	0.764368	0.631091	0.825454	0.843996	0.771051
cg00846036	0.0651722	0.326621	0.245007	0.156058	0.18316	0.62098	0.294628	0.631475	0.144748	0.213829	0.187644	0.356271	0.907596	0.174296	0.121925	0.248574	0.0850407	0.0866709	0.106845	0.154428	0.521842	0.0680251	0.717673	0.142812	0.106438	0.357392	0.172768	0.117849	0.108068	0.0895238	0.54925	0.23003	0.28556	0.108679	0.732957	0.32224	0.0881993	0.107864	0.182142	0.130076	0.0630325	0.385513	0.0824935	0.114079	0.106438	0.312153	0.101071	0.163394	0.134253
cg00848394	0.0345701	0.0205885	0.0447005	0.0195839	0.0282909	0.0218444	0.0220118	0.0251932	0.024356	0.0240211	0.0187466	0.0417702	0.0256956	0.0467098	0.0187466	0.0274537	0.0204211	0.0236862	0.0204211	0.0346538	0.0264491	0.0234351	0.0194164	0.0395097	0.0186629	0.0295468	0.0230165	0.0241048	0.0221792	0.0234351	0.0215932	0.026784	0.0205885	0.0308863	0.0297142	0.02377	0.0205885	0.0904127	0.0266165	0.020756	0.0262816	0.0357422	0.0236862	0.0231839	0.0245235	0.0232676	0.0413516	0.0179094	0.0197513
cg00848397	0.0371693	0.0327534	0.0268938	0.0313946	0.0328383	0.0330931	0.0275731	0.0297811	0.0416702	0.0324137	0.0415003	0.0431988	0.0291867	0.0341971	0.0216286	0.024516	0.0382733	0.0336875	0.0312248	0.0268938	0.0305454	0.0316494	0.0217135	0.0326685	0.0295264	0.0287621	0.0236667	0.0319042	0.0350463	0.0197603	0.0234969	0.0195056	0.0215437	0.0334328	0.0225628	0.0240064	0.0341121	0.029866	0.035301	0.0340272	0.0280827	0.0333478	0.0246009	0.0347915	0.0260446	0.0285922	0.0377072	0.0313097	0.0275731
cg00848728	0.349447	0.353266	0.52399	0.434558	0.549312	0.449631	0.460785	0.545494	0.390646	0.627389	0.421696	0.313273	0.599153	0.743851	0.625078	0.520573	0.530019	0.579457	0.467819	0.340504	0.285037	0.683459	0.561169	0.467316	0.473848	0.478068	0.409638	0.417275	0.535947	0.358692	0.473948	0.463598	0.306138	0.224645	0.487715	0.399589	0.311163	0.385923	0.321513	0.491031	0.648993	0.400192	0.423907	0.26092	0.264638	0.442898	0.658271	0.371353	0.485203
cg00849368	0.0556326	0.0509679	0.0543887	0.0472362	0.0312728	0.054285	0.0567728	0.0492057	0.0766752	0.0592606	0.046096	0.0659984	0.0875593	0.037596	0.446424	0.0450594	0.0447484	0.0436082	0.0393582	0.0515899	0.520748	0.0477338	0.0499313	0.0571874	0.0446448	0.0472362	0.0466143	0.0548033	0.0614374	0.042157	0.0393582	0.0387362	0.0519009	0.0443338	0.0349009	0.0398765	0.0485838	0.0928459	0.0571874	0.0416387	0.0309619	0.0434009	0.0540777	0.0769862	0.132754	0.0537667	0.0486183	0.0401875	0.0475472
cg00850538	0.519467	0.530426	0.696479	0.59884	0.362381	0.646442	0.488692	0.682641	0.550906	0.652752	0.437437	0.649209	0.627069	0.488581	0.395038	0.7629	0.310572	0.389724	0.388506	0.383303	0.535076	0.674671	0.733121	0.604707	0.878694	0.463562	0.731571	0.520131	0.443082	0.221679	0.845484	0.576257	0.476514	0.836517	0.799321	0.611903	0.16987	0.522013	0.770096	0.72028	0.861203	0.62408	0.221568	0.65563	0.328506	0.406219	0.38751	0.484374	0.581238
cg00852964	0.261951	0.359955	0.0777387	0.212757	0.127124	0.156659	0.160783	0.428998	0.120124	0.372133	0.139686	0.366475	0.372613	0.135083	0.100945	0.151961	0.181016	0.155125	0.234046	0.350269	0.207963	0.05482	0.223593	0.11974	0.0786976	0.1744	0.0818621	0.282472	0.0983559	0.0557789	0.608895	0.120891	0.445492	0.0971093	0.53266	0.350749	0.146782	0.124919	0.218511	0.15829	0.0785058	0.232895	0.102575	0.0825334	0.167975	0.207963	0.0542446	0.135275	0.166441
cg00853068	0.394961	0.279621	0.298192	0.451344	0.308036	0.501239	0.329404	0.600246	0.382543	0.747469	0.220105	0.282977	0.572389	0.549456	0.535472	0.198178	0.0970462	0.476292	0.146158	0.508958	0.291815	0.200528	0.340815	0.538716	0.528312	0.543862	0.469356	0.438367	0.765368	0.492625	0.700483	0.600805	0.27481	0.514887	0.682807	0.336676	0.181733	0.228496	0.560419	0.573173	0.391157	0.145487	0.522942	0.534801	0.401673	0.475844	0.564894	0.573956	0.472264
cg00854637	0.0332138	0.0631726	0.0793259	0.073691	0.0569742	0.0555655	0.0579133	0.0651448	0.0696527	0.0550959	0.0611064	0.0875904	0.059416	0.0445774	0.0476766	0.0465497	0.0349981	0.0679622	0.0665535	0.0695588	0.0739728	0.0757571	0.0596038	0.0734093	0.072564	0.0655204	0.056035	0.0839277	0.0522785	0.0522785	0.0573498	0.0574438	0.0646752	0.055002	0.0767902	0.0619517	0.058289	0.0997054	0.0811103	0.0546263	0.0492732	0.0570681	0.0603551	0.0610125	0.0614821	0.0640178	0.0654265	0.0301146	0.0714371
cg00854995	0.0317786	0.0540097	0.0495135	0.0604209	0.0336104	0.0298636	0.0329443	0.0441847	0.0558414	0.0470989	0.0327778	0.0525109	0.0330276	0.0340267	0.0417701	0.0296138	0.0431856	0.0640844	0.0345263	0.0451006	0.043019	0.0382731	0.0446843	0.0465161	0.0436851	0.0537599	0.0322782	0.0437684	0.0334439	0.0376902	0.0575067	0.037607	0.0384396	0.046183	0.0535934	0.0281983	0.0419366	0.04585	0.0570904	0.0500131	0.0519281	0.0466826	0.049347	0.0472654	0.0485976	0.0367744	0.046072	0.032861	0.0443512
cg00856375	0.0506647	0.0410492	0.0332827	0.0459494	0.0416039	0.0985577	0.0428983	0.0264409	0.0505723	0.0425285	0.0448399	0.0492779	0.0310637	0.0447475	0.0190443	0.031526	0.0281976	0.0286598	0.0328204	0.0372584	0.0399397	0.0264409	0.0445625	0.0445625	0.0352243	0.0408642	0.0410492	0.0318034	0.0330978	0.0253314	0.0303241	0.0220029	0.0352243	0.026071	0.0421586	0.0343922	0.0273654	0.0447475	0.0425285	0.0300467	0.0321732	0.0367961	0.0303241	0.0366112	0.0326355	0.0314336	0.0343922	0.0392	0.0334676
cg00858899	0.0662594	0.0773316	0.0653505	0.0755964	0.0622107	0.0631196	0.0782405	0.078571	0.0996411	0.0806367	0.0757616	0.0708866	0.0552699	0.0859249	0.0589882	0.0563441	0.0766706	0.053039	0.0564267	0.0849333	0.0936093	0.060145	0.0386617	0.0709692	0.0562615	0.0807193	0.0574183	0.0819587	0.0489902	0.0532042	0.0395706	0.0577488	0.0796452	0.0536174	0.0755964	0.063698	0.0579967	0.0677467	0.0946008	0.0584924	0.0796452	0.0859249	0.0848507	0.0730349	0.0593187	0.0717955	0.0678294	0.0449415	0.0891474
cg00859655	0.793223	0.751311	0.617433	0.788228	0.7575	0.908751	0.841106	0.871726	0.762386	0.913637	0.762169	0.760106	0.812116	0.848055	0.863039	0.751311	0.781279	0.77889	0.59854	0.608529	0.732636	0.799955	0.821345	0.662602	0.870314	0.859999	0.729487	0.660213	0.861736	0.695067	0.726555	0.754569	0.807881	0.786708	0.868903	0.831877	0.518843	0.795286	0.773027	0.755654	0.508745	0.683341	0.722321	0.81787	0.662385	0.694307	0.613886	0.89583	0.789965
cg00861635	0.0354872	0.0520574	0.0590997	0.0330017	0.0357358	0.0425296	0.0475006	0.0453465	0.044518	0.0315933	0.0577741	0.0495719	0.0330017	0.0344102	0.0280307	0.0459264	0.0490748	0.0745928	0.0399612	0.0446008	0.0341616	0.0291906	0.0458436	0.0363986	0.0475835	0.0450151	0.0424467	0.0518088	0.0434409	0.0486605	0.028942	0.0349073	0.0429438	0.0468378	0.053963	0.0462578	0.0416182	0.0325875	0.0475006	0.0409554	0.0636565	0.0508975	0.0358186	0.0298534	0.0470864	0.0403754	0.0623033	0.0263737	0.0375585
cg00862290	0.744974	0.826128	0.918082	0.935831	0.920006	0.861199	0.880124	0.895628	0.818323	0.958071	0.80314	0.656014	0.914981	0.902043	0.941712	0.91049	0.898301	0.943102	0.899263	0.8782	0.882797	0.817788	0.886112	0.913163	0.861413	0.843557	0.913805	0.692689	0.951121	0.918616	0.923535	0.911346	0.792875	0.805813	0.920327	0.892634	0.853501	0.68499	0.912415	0.903006	0.602981	0.66553	0.633774	0.907924	0.93134	0.854784	0.910562	0.924925	0.870715
cg00862770	0.0265365	0.0272705	0.0317563	0.0357528	0.0328982	0.0295542	0.0355897	0.0277599	0.0275967	0.0347741	0.0277599	0.0365684	0.0247421	0.0302067	0.0233556	0.0236818	0.0251499	0.0255577	0.0249868	0.0262918	0.0253946	0.0177279	0.0231109	0.0281677	0.0252315	0.0272705	0.0260471	0.0284124	0.0177279	0.0209904	0.0229478	0.0241712	0.0246606	0.0249053	0.0234372	0.0289017	0.0209904	0.0336322	0.0356712	0.021235	0.0262918	0.0242528	0.0280045	0.0264549	0.0199301	0.0332244	0.0299348	0.0237634	0.0257209
cg00864867	0.0837455	0.0560893	0.0740865	0.0357806	0.0449443	0.035533	0.0252135	0.0379271	0.0751597	0.0476687	0.0413119	0.0813514	0.0611252	0.0276076	0.0219113	0.0328912	0.0394956	0.0473384	0.0323958	0.0512186	0.0831676	0.039991	0.0285983	0.0683076	0.0308273	0.0801131	0.0536127	0.0390829	0.0479989	0.021581	0.0371841	0.0323958	0.0342946	0.029589	0.0446141	0.0568323	0.0494023	0.0784619	0.0443664	0.0460175	0.043706	0.0770585	0.04222	0.0290936	0.042963	0.0345423	0.0565296	0.035533	0.0409816
cg00870662	0.0362025	0.051378	0.475207	0.0769595	0.0912678	0.785654	0.0377201	0.0308911	0.0640604	0.0681794	0.0454162	0.0617841	0.877466	0.0320835	0.0184255	0.038804	0.05192	0.0236286	0.0227614	0.0902923	0.0447658	0.0281812	0.0756588	0.0347934	0.0300239	0.0381537	0.339279	0.0319751	0.0260133	0.0460666	0.0159324	0.0275308	0.238795	0.041514	0.391417	0.0515948	0.0317583	0.0254713	0.064494	0.0318667	0.0198347	0.137011	0.0362025	0.0288316	0.0220026	0.181887	0.039346	0.0242789	0.0476925
cg00871453	0.0516284	0.0429668	0.0270872	0.0459502	0.0281458	0.0270872	0.0402721	0.0378661	0.0452765	0.0278571	0.0379623	0.0436405	0.0359413	0.0311292	0.0252586	0.0384435	0.0388285	0.0584614	0.0400796	0.0363262	0.0398871	0.0293007	0.0329578	0.0404645	0.0311292	0.0446991	0.0305518	0.0432555	0.0296856	0.0441217	0.0233338	0.0549006	0.052687	0.0421006	0.0452765	0.0399833	0.0315142	0.0318992	0.0533607	0.0289157	0.0357488	0.0389247	0.0333428	0.0311292	0.0404645	0.0513397	0.0530399	0.0294932	0.0380585
cg00873037	0.0215474	0.0414512	0.0556442	0.0408633	0.0293578	0.0357404	0.0396036	0.0403594	0.0447265	0.0561481	0.0463222	0.0405274	0.0509412	0.0454823	0.0218834	0.0432148	0.0587515	0.0343127	0.0679056	0.0351525	0.042543	0.0340608	0.0384278	0.0334729	0.0404434	0.0382599	0.0343127	0.0373361	0.0713488	0.0373361	0.0607671	0.0393516	0.0248227	0.0412832	0.047162	0.0420391	0.0448945	0.0620268	0.0355724	0.0349846	0.0309534	0.0327171	0.0511091	0.0374201	0.0511091	0.0323811	0.0666458	0.0835262	0.0599273
cg00873937	0.0313983	0.0420409	0.0236917	0.0470869	0.0273615	0.0202971	0.0411234	0.021398	0.0463529	0.038004	0.0377288	0.0378206	0.0179117	0.015618	0.0336002	0.0227742	0.0202053	0.0202971	0.0291047	0.0408482	0.0512155	0.0218567	0.0385545	0.0498393	0.0351599	0.040206	0.0270863	0.0274533	0.0293799	0.039105	0.0379123	0.0245174	0.0316736	0.0252513	0.0193796	0.0324075	0.0278202	0.0496558	0.0515825	0.021031	0.0239669	0.0453437	0.0247009	0.0219485	0.0297469	0.0395637	0.03464	0.0164437	0.0391967
cg00874863	0.0327758	0.848576	0.187917	0.498804	0.885951	0.155075	0.638431	0.821779	0.670768	0.87487	0.76748	0.795284	0.190738	0.731112	0.534264	0.851901	0.792766	0.734739	0.75116	0.872452	0.815533	0.807474	0.189025	0.85996	0.515023	0.300243	0.410555	0.857442	0.408338	0.203935	0.0937241	0.578288	0.583829	0.819563	0.235265	0.592795	0.567408	0.779065	0.705524	0.670063	0.639942	0.865904	0.408036	0.849483	0.841524	0.423349	0.169918	0.715397	0.21149
cg00875272	0.0419751	0.0603073	0.314942	0.230096	0.0205716	0.0459103	0.23883	0.103498	0.0469661	0.670836	0.0835344	0.0453344	0.232111	0.0558922	0.0927485	0.0862219	0.0179801	0.105226	0.0313213	0.124614	0.0413032	0.0248907	0.31523	0.0318972	0.356598	0.0460063	0.0740324	0.042647	0.0215314	0.0516691	0.0417831	0.0200917	0.0498455	0.0697133	0.361684	0.0463902	0.0267143	0.0264263	0.0724967	0.0490776	0.331835	0.190744	0.0360243	0.0539726	0.028154	0.18892	0.0741284	0.0317052	0.0468701
cg00876704	0.0313014	0.0118243	0.0144462	0.014259	0.0134162	0.0128544	0.0134162	0.0140717	0.0208137	0.012948	0.0125734	0.0123862	0.0162254	0.0154763	0.0138844	0.0112625	0.0117307	0.0124798	0.0127607	0.0113561	0.0148208	0.0128544	0.0127607	0.0171618	0.0151017	0.0188473	0.013978	0.0138844	0.0103261	0.0143526	0.0118243	0.0188473	0.0132289	0.0171618	0.0416017	0.0147271	0.0117307	0.0158508	0.0140717	0.0130416	0.0159445	0.0102324	0.0134162	0.0158508	0.0137908	0.0120116	0.0204392	0.0187536	0.0164127
cg00877887	0.0333124	0.0806914	0.0605057	0.13079	0.0402153	0.141458	0.0545441	0.171998	0.0320573	0.0711738	0.0300701	0.0653168	0.72036	0.0911504	0.0264095	0.0435622	0.0401107	0.0766124	0.0342537	0.0682453	0.203061	0.0563221	0.216239	0.0564267	0.0457585	0.0358226	0.18549	0.0390648	0.0364501	0.0144863	0.302526	0.211637	0.0997267	0.0462815	0.109558	0.144386	0.0393786	0.0501513	0.0576817	0.0465953	0.0387511	0.0733702	0.04921	0.0570542	0.0442943	0.289556	0.0417841	0.0640617	0.0240039
cg00877964	0.0939964	0.035001	0.030311	0.0594384	0.0246336	0.0283363	0.0135257	0.0337668	0.0668437	0.144352	0.0468495	0.0295705	0.011551	0.0214247	0.0058736	0.00192412	0.0122915	0.000443065	0.00315833	0.0187094	0.0362352	0.0994269	0.039691	0.0453684	0.0819011	0.0527737	0.00241781	0.0777048	0.0258678	0.0372226	0.0315452	0.025621	0.0110573	0.0216715	0.0488242	0.0192031	0.0226589	0.0337668	0.0628942	-0.00375326	0.0105636	0.0187094	0.0150068	0.0453684	0.0058736	0.0275957	0.0280894	0.0300642	0.0532674
cg00881086	0.0273702	0.0336985	0.040533	0.0515019	0.034711	0.0350485	0.0297328	0.0321797	0.0531894	0.0385079	0.0397736	0.0359766	0.0267796	0.0384236	0.0336985	0.0276234	0.0324328	0.0377485	0.0315047	0.0264421	0.0440768	0.0321797	0.034036	0.0479581	0.0455112	0.0375798	0.0338672	0.038086	0.030239	0.0293953	0.0290578	0.0355548	0.026864	0.0449205	0.0385079	0.028214	0.0248389	0.0411236	0.030239	0.030239	0.0370735	0.0349641	0.0341204	0.0495613	0.038086	0.0292265	0.0355266	0.0451737	0.0428111
cg00881370	0.882359	0.936115	0.879502	0.924239	0.874947	0.93299	0.872894	0.893967	0.881912	0.9329	0.91513	0.861017	0.95192	0.931293	0.880394	0.948527	0.943527	0.930757	0.92147	0.947813	0.890306	0.882359	0.902093	0.907094	0.921828	0.938169	0.904951	0.938705	0.971833	0.923256	0.893074	0.953796	0.909683	0.896557	0.909683	0.926828	0.873608	0.914595	0.923524	0.913077	0.936919	0.883252	0.890574	0.927543	0.851641	0.89111	0.922125	0.907362	0.925846
cg00882451	0.551754	0.868238	0.859531	0.613613	0.908634	0.873401	0.739761	0.877046	0.787143	0.92868	0.864391	0.894257	0.938399	0.844952	0.813567	0.921492	0.591947	0.927971	0.854368	0.918353	0.871275	0.834119	0.875426	0.67851	0.653401	0.885145	0.839991	0.928376	0.581216	0.874313	0.937488	0.651275	0.862973	0.728321	0.877957	0.875629	0.440691	0.820553	0.638924	0.857203	0.864492	0.749886	0.675067	0.917948	0.587695	0.838473	0.566063	0.707566	0.813162
cg00882832	0.0252134	0.0408748	0.0308515	0.0336258	0.0244974	0.0224391	0.0396219	0.0448125	0.0468709	0.0396219	0.0269137	0.0278982	0.0242289	0.0219916	0.0296881	0.030046	0.0304935	0.0326414	0.031299	0.0313884	0.0315674	0.0340733	0.0290616	0.0319254	0.037474	0.0356842	0.0278982	0.0366686	0.037653	0.0389059	0.0338048	0.0449915	0.0341628	0.0389954	0.0303145	0.0384585	0.0292406	0.0349682	0.0410538	0.0271822	0.0262873	0.0433806	0.0347892	0.0457075	0.0365791	0.0345207	0.0351174	0.023155	0.0277192
cg00884221	0.0407946	0.0718543	0.0409863	0.0536403	0.02862	0.533915	0.0340842	0.0342759	0.0438622	0.0401236	0.0509561	0.049614	0.764274	0.0326462	0.0310166	0.0384939	0.0590086	0.0280448	0.0443415	0.265114	0.0429995	0.0330297	0.391558	0.0591045	0.0359056	0.0473133	0.230124	0.0445333	0.0367684	0.0269903	0.364237	0.0327421	0.116718	0.0547906	0.438435	0.0361932	0.032838	0.0469298	0.0407946	0.0461629	0.0410822	0.0337007	0.0367684	0.0585293	0.0314959	0.342764	0.0498697	0.0355221	0.0451084
cg00884529	0.0724537	0.0900081	0.0718717	0.0955363	0.0734235	0.0759451	0.0885533	0.0792427	0.110278	0.104653	0.0956332	0.097476	0.0845769	0.0763331	0.063046	0.0604274	0.0647918	0.0878744	0.0584877	0.0916568	0.107562	0.0978639	0.0874864	0.10184	0.114642	0.105429	0.0711928	0.0967971	0.0713868	0.0784668	0.0694471	0.0825402	0.0825402	0.0664405	0.0677014	0.101743	0.100095	0.0901051	0.124341	0.0688652	0.10184	0.0921418	0.0590696	0.0664405	0.0816673	0.0645008	0.0825402	0.0679923	0.0927237
cg00885506	0.105838	0.0329674	0.0357259	0.042967	0.0272205	0.0215885	0.035611	0.0425072	0.0371051	0.0377948	0.022508	0.0389442	0.0269906	0.0382545	0.0285997	0.039174	0.0427371	0.0267607	0.0384844	0.0328524	0.0451508	0.0253815	0.0304387	0.0397487	0.02814	0.0421624	0.0441164	0.0319329	0.0242321	0.0361856	0.0402085	0.044806	0.0234275	0.0643455	0.0236574	0.0236574	0.0305537	0.0381396	0.0442313	0.0387143	0.0384844	0.0337719	0.0285997	0.0529666	0.0305537	0.02814	0.0373733	0.037335	0.0385993
cg00886554	0.074872	0.0474302	0.0658501	0.0920701	0.0824843	0.112088	0.0417915	0.0383143	0.0355889	0.0832361	0.115847	0.0544786	0.425225	0.0866194	0.0477122	0.0292923	0.0402878	0.0808867	0.0318298	0.0382203	0.0291983	0.0567341	0.035025	0.0446109	0.0343672	0.0476182	0.0286345	0.0540087	0.0687634	0.0341792	0.0228078	0.0499677	0.0317358	0.04837	0.122895	0.0962052	0.0548545	0.0229958	0.0555124	0.0378444	0.0670718	0.0473362	0.0332394	0.0416975	0.0321117	0.0338033	0.127594	0.0735563	0.0356829
cg00887101	0.0452713	0.0517436	0.0481838	0.061452	0.0609666	0.0509345	0.0538471	0.0663062	0.034592	0.12391	0.0761765	0.0813543	0.0499637	0.0400934	0.0376663	0.0263398	0.032003	0.03621	0.0413879	0.0462421	0.0611284	0.0281197	0.0378281	0.0502873	0.0423587	0.0797363	0.0562742	0.0789272	0.0601576	0.0342684	0.0323267	0.0352392	0.0310322	0.0252071	0.061452	0.0499637	0.0562742	0.0722931	0.0849141	0.0350774	0.0577304	0.0523908	0.0415497	0.0443004	0.0297377	0.0326503	0.0495861	0.048022	0.048022
cg00887547	0.395715	0.0486985	0.076793	0.0491069	0.036938	0.0366113	0.0418382	0.0321195	0.0695244	0.0367747	0.0362847	0.04388	0.0534354	0.0293427	0.0444517	0.029016	0.0420832	0.0471468	0.0491885	0.0464117	0.0626641	0.0504136	0.0386531	0.077283	0.0524553	0.0627458	0.0383264	0.0472284	0.037183	0.0424099	0.0513936	0.0379997	0.0411849	0.0388164	0.044125	0.0428183	0.0265659	0.068871	0.0540887	0.0595606	0.0372647	0.0348963	0.0504953	0.0466568	0.0358763	0.0326095	0.0455406	0.0312211	0.0652775
cg00887700	0.0364967	0.0275779	0.0299685	0.0265665	0.0227048	0.0262907	0.018935	0.0289571	0.0468865	0.0273021	0.0213256	0.0306121	0.0195786	0.0278537	0.0173719	0.019027	0.0250034	0.0194867	0.0285893	0.0230726	0.0320833	0.0215095	0.0173719	0.0299685	0.0260148	0.0340141	0.0199464	0.0258309	0.0184753	0.0266585	0.0195786	0.0195786	0.0159008	0.0280376	0.0192108	0.0210498	0.0220612	0.0265665	0.029049	0.02059	0.0312557	0.0273021	0.022337	0.0278537	0.0182914	0.0216934	0.0315929	0.0212337	0.0298766
cg00888007	0.0083702	0.0434739	0.015177	0.0308327	0.0284017	0.0395843	0.0727432	0.0264569	0.0328747	0.271794	0.0239286	0.0241231	0.761787	0.0465856	0.0229562	0.0182887	0.0243176	0.0231507	0.0197473	0.0328747	0.0675894	0.0177053	0.0290823	0.0195528	0.0240259	0.0201363	0.0162466	0.0360836	0.0345278	0.0177053	0.0259707	0.0239286	0.017608	0.0361809	0.0970532	0.0238314	0.0237341	0.0270403	0.0305409	0.0154687	0.0240259	0.0303465	0.0144963	0.0550455	0.0177053	0.102012	0.0182887	0.0202335	0.030152
cg00888479	0.0304247	0.388525	0.475728	0.255689	0.0568991	0.741401	0.149327	0.130516	0.303529	0.374359	0.0868569	0.170808	0.477121	0.0652594	0.505338	0.165816	0.0615437	0.0685107	0.0660722	0.266952	0.141663	0.0405268	0.259056	0.127613	0.407104	0.382139	0.389338	0.0961462	0.0637499	0.0804706	0.549461	0.0933594	0.372617	0.157571	0.719222	0.135161	0.0762904	0.209243	0.414535	0.101487	0.103694	0.332441	0.0725747	0.0383206	0.0978879	0.379468	0.0783805	0.0472615	0.108454
cg00888561	0.03447	0.0469203	0.0583876	0.0427429	0.0413504	0.0296373	0.0300468	0.0494595	0.0352891	0.104749	0.031685	0.0632203	0.0604354	0.0583876	0.0248046	0.0484765	0.0230845	0.0388112	0.0288182	0.0543741	0.0660053	0.0347157	0.0267704	0.0450363	0.0303745	0.0330775	0.0373368	0.0363539	0.0239036	0.0228387	0.0210367	0.0309478	0.053555	0.0217739	0.0669882	0.0423333	0.0243131	0.0192347	0.0329956	0.0323403	0.0313574	0.0592887	0.0317669	0.033487	0.0237398	0.0347157	0.033487	0.0290639	0.0316031
cg00890257	0.070555	0.0406965	0.0321526	0.0403367	0.0353004	0.033052	0.026037	0.0281055	0.0442939	0.0370091	0.0276558	0.0407864	0.0360198	0.0335916	0.027386	0.0295445	0.0262169	0.0272062	0.0268464	0.0412361	0.0526579	0.0242383	0.0320627	0.037189	0.0322426	0.030174	0.0231591	0.0419556	0.030264	0.0292747	0.0183925	0.0269364	0.0336815	0.0266666	0.03575	0.0314331	0.0291847	0.0370991	0.0439341	0.0253175	0.0272062	0.0561653	0.0283753	0.0284653	0.0214503	0.0236987	0.0328721	0.024598	0.0342211
cg00891278	0.850957	0.419954	0.691242	0.688283	0.668059	0.698443	0.526102	0.716398	0.509529	0.747473	0.60295	0.378028	0.807057	0.175499	0.693116	0.515842	0.650993	0.769866	0.617452	0.448168	0.469279	0.759508	0.732872	0.677727	0.752208	0.650795	0.639451	0.476875	0.736621	0.625936	0.723599	0.622976	0.349025	0.666185	0.577696	0.510318	0.706138	0.639845	0.586673	0.601964	0.901761	0.461289	0.656616	0.596933	0.649118	0.517914	0.669506	0.65119	0.641621
cg00891541	0.145649	0.817748	0.845895	0.889041	0.835432	0.905337	0.753121	0.93728	0.907837	0.910244	0.894226	0.551741	0.931632	0.940983	0.916077	0.902837	0.839136	0.876079	0.904874	0.764695	0.867375	0.925521	0.950705	0.90904	0.910799	0.882838	0.863301	0.664144	0.933483	0.854691	0.856543	0.778213	0.57924	0.894133	0.87756	0.795342	0.891448	0.776361	0.839506	0.847376	0.948668	0.846265	0.911725	0.934965	0.679976	0.848117	0.918299	0.880986	0.870431
cg00892393	0.838594	0.795425	0.268089	0.454687	0.803352	0.659601	0.858517	0.853376	0.849412	0.903185	0.85209	0.843628	0.689594	0.894616	0.884761	0.648033	0.712196	0.730513	0.481359	0.846092	0.57455	0.874478	0.710803	0.411411	0.846413	0.813957	0.297653	0.693129	0.815563	0.711767	0.34682	0.552377	0.827025	0.767361	0.722265	0.859267	0.625431	0.592975	0.767468	0.805923	0.885404	0.718087	0.319719	0.645462	0.761469	0.681132	0.297796	0.826275	0.71391
cg00892798	0.0567608	0.207948	0.0823783	0.432593	0.0530386	0.714495	0.099785	0.223165	0.101099	0.466859	0.0540239	0.104383	0.804594	0.0545713	0.513058	0.0368361	0.0459227	0.0346466	0.0982524	0.340086	0.0732918	0.0638768	0.706941	0.19711	0.116754	0.123651	0.61509	0.412888	0.0348655	0.0701169	0.700263	0.060483	0.085991	0.108653	0.628118	0.185833	0.0873047	0.475289	0.0917933	0.0566513	0.50857	0.0726349	0.0539144	0.172039	0.122775	0.5817	0.0449739	0.130001	0.499483
cg00893242	0.0192786	0.0862038	0.0404129	0.0451094	0.026504	0.333764	0.356072	0.130369	0.0891843	0.262233	0.0396904	0.0420386	0.0496253	0.0234332	0.0250589	0.0562185	0.0293039	0.0291232	0.0517026	0.0434837	0.0358067	0.026504	0.204971	0.0349035	0.0232526	0.195127	0.0399613	0.0356261	0.0147628	0.0314715	0.0713918	0.0507994	0.0575732	0.0261428	0.633076	0.194314	0.0450191	0.0252396	0.0543218	0.0505285	0.0408645	0.101377	0.0270459	0.070308	0.0248783	0.199552	0.0309296	0.0244267	0.0382453
cg00893636	0.0397204	0.0551296	0.0883922	0.029731	0.039189	0.52697	0.0341943	0.031325	0.0334504	0.0539606	0.0491785	0.0419521	0.695834	0.0765962	0.0272868	0.0265429	0.0326003	0.0429085	0.0384451	0.0357884	0.44918	0.0389765	0.0274993	0.0555547	0.0554484	0.0412082	0.0362135	0.0486471	0.0282432	0.0221858	0.0202729	0.0186788	0.185842	0.0406768	0.488182	0.363314	0.036426	0.0319627	0.0599118	0.0515164	0.0549171	0.0450339	0.0282432	0.0400392	0.0256927	0.260763	0.0531105	0.0661817	0.0498161
cg00893987	0.0340275	0.0300439	0.0294749	0.0167112	0.0311821	0.0237841	0.0200444	0.0423198	0.0345966	0.0238654	0.0241093	0.0346779	0.0288245	0.0246783	0.0271985	0.0172803	0.0302065	0.0289058	0.0256539	0.0253287	0.0363851	0.030613	0.0252474	0.0315073	0.0272798	0.035816	0.0242718	0.033621	0.0280115	0.0198818	0.0222394	0.0228085	0.0266295	0.0346779	0.0249222	0.0324828	0.0313447	0.0375233	0.0340275	0.0267108	0.0380923	0.0331332	0.021589	0.0487422	0.0319138	0.0229711	0.0389866	0.0307756	0.0331332
cg00895324	0.493112	0.787417	0.304168	0.43421	0.44375	0.481705	0.859075	0.83792	0.726233	0.913518	0.788869	0.692323	0.805357	0.914037	0.132957	0.771032	0.662872	0.680812	0.384018	0.696056	0.73567	0.872971	0.223488	0.320553	0.259265	0.244229	0.276065	0.707256	0.257814	0.899104	0.141668	0.423217	0.766469	0.29328	0.828275	0.58437	0.540504	0.699582	0.445928	0.806291	0.79115	0.740855	0.526919	0.522563	0.596295	0.698234	0.860008	0.870793	0.75527
cg00897329	0.019839	0.0318694	0.0436474	0.0530698	0.0333837	0.0338043	0.0269899	0.0246343	0.061735	0.0292614	0.0274106	0.0380949	0.0274106	0.0512189	0.0263169	0.0358234	0.0311122	0.0354869	0.058454	0.0300185	0.0412076	0.0380949	0.0286725	0.0444887	0.0292614	0.044068	0.0253073	0.0432267	0.0242137	0.031617	0.0318694	0.0460871	0.0285042	0.031617	0.0317852	0.0327948	0.0279995	0.0369171	0.0366647	0.0417124	0.030944	0.0327948	0.0248026	0.04146	0.0282518	0.0274106	0.0425537	0.0261486	0.0655208
cg00899086	0.0819895	0.0456864	0.107801	0.0578493	0.0369588	0.0433652	0.0342662	0.0315737	0.0566423	0.0732619	0.0378873	0.0576636	0.0276741	0.0771615	0.0317594	0.0351019	0.0451293	0.0519071	0.0206178	0.030181	0.050793	0.035009	0.0437366	0.0416011	0.0529284	0.0602633	0.0306452	0.0505144	0.0240531	0.0278598	0.0535784	0.042901	0.0452222	0.0279527	0.0361232	0.0420654	0.0614703	0.0549711	0.0571994	0.0451293	0.0300881	0.0768829	0.028974	0.0275813	0.0421582	0.0508858	0.0726429	0.033802	0.0649057
cg00899641	0.029867	0.0322552	0.0322552	0.0300439	0.0270366	0.0244716	0.0185454	0.0240293	0.0188108	0.028098	0.0207567	0.0248254	0.0204029	0.0239409	0.0144767	0.0215527	0.0284518	0.0254445	0.019253	0.0265059	0.0265059	0.023764	0.020226	0.0236755	0.0291594	0.0242947	0.0221719	0.0231448	0.0247369	0.0181916	0.0242062	0.0186339	0.0211105	0.0244716	0.0242947	0.0219065	0.0219065	0.0301324	0.0259752	0.0240293	0.0295132	0.0226141	0.0235871	0.0243831	0.0233217	0.0188108	0.0241178	0.019253	0.0348202
cg00901493	0.122139	0.062349	0.0466875	0.0475166	0.0300125	0.0237479	0.0785633	0.0442001	0.0398701	0.0418048	0.0454898	0.100858	0.0493592	0.0333291	0.0362772	0.0273409	0.0351716	0.041989	0.041989	0.101319	0.0466875	0.0398701	0.0473324	0.0367378	0.0283543	0.0379354	0.0279857	0.0498198	0.0358165	0.0291834	0.0243928	0.0404229	0.0599537	0.035448	0.0432788	0.0430024	0.0380276	0.0464111	0.0743255	0.0438316	0.244668	0.203211	0.0348953	0.0330527	0.0541497	0.063086	0.0406071	0.0262353	0.0449371
cg00901652	0.0232075	0.0397284	0.0531322	0.0447159	0.0303769	0.0383257	0.0305328	0.0733937	0.0618602	0.0400401	0.0387933	0.0701207	0.0302211	0.0247661	0.0228958	0.0264805	0.0303769	0.0327148	0.0406636	0.0431573	0.0660684	0.036923	0.0439366	0.0691855	0.0503267	0.0635746	0.054379	0.0415987	0.0286625	0.0638864	0.0567169	0.0758874	0.0370788	0.0300652	0.042378	0.0440924	0.0352085	0.0601458	0.0454951	0.0339617	0.0350527	0.0400401	0.0295977	0.0333382	0.0386374	0.0398843	0.0513658	0.0308445	0.0567169
cg00901683	0.0712694	0.0150513	0.0159516	0.0212533	0.0168519	0.0137509	0.0228538	0.0187525	0.020453	0.0178522	0.014051	0.0259548	0.0139509	0.0218535	0.0216534	0.0222536	0.0163517	0.0160516	0.0207531	0.0186525	0.0258548	0.0284556	0.0185524	0.026555	0.0224537	0.0214534	0.0197528	0.0245544	0.0161517	0.0209532	0.0145511	0.0152514	0.0120503	0.0224537	0.014251	0.0238541	0.0158516	0.0195527	0.0236541	0.020353	0.0231539	0.023454	0.0136508	0.020353	0.0186525	0.0178522	0.0220535	0.014051	0.0230539
cg00901704	0.0428784	0.0397055	0.0474708	0.0447154	0.0582421	0.0423774	0.0403734	0.0467193	0.0395385	0.0675105	0.0441309	0.0464688	0.0439639	0.0559042	0.0407909	0.038453	0.0550692	0.0545682	0.0509778	0.0543177	0.0514788	0.0528982	0.0387035	0.0614151	0.0551527	0.0528982	0.0390375	0.0578246	0.039956	0.0296856	0.0395385	0.0485563	0.0446319	0.0468863	0.0478883	0.0494748	0.0380355	0.0484728	0.0514788	0.0455504	0.0589101	0.0483058	0.0469698	0.0460513	0.0398725	0.0370335	0.0512839	0.0452999	0.0495583
cg00901766	0.0353194	0.0292219	0.0339543	0.030769	0.0256726	0.0336813	0.0264007	0.0264917	0.0405978	0.0327712	0.0279478	0.0391417	0.0297679	0.030041	0.0329532	0.0293129	0.0314971	0.0368665	0.0292219	0.029859	0.0366845	0.02995	0.0261277	0.0438741	0.0288579	0.0476054	0.0849184	0.0329532	0.0267647	0.0245805	0.0265827	0.0294039	0.0287669	0.0368665	0.042691	0.0285849	0.0312241	0.0421449	0.0352284	0.0311331	0.0292219	0.0284028	0.0290399	0.0362295	0.0287669	0.0257636	0.0336206	0.0267647	0.0364115
cg00903242	0.743868	0.397695	0.750624	0.629013	0.721347	0.534105	0.484239	0.778721	0.625796	0.806389	0.618289	0.259033	0.897436	0.766817	0.816363	0.283484	0.176244	0.902155	0.266862	0.521666	0.409063	0.480485	0.841135	0.769498	0.871377	0.673304	0.610461	0.355872	0.859581	0.925533	0.1756	0.155546	0.32638	0.760169	0.589013	0.13635	0.608209	0.482415	0.398339	0.64156	0.923603	0.447133	0.585366	0.823333	0.610568	0.631373	0.0680737	0.804459	0.749016
cg00904483	0.901342	0.963998	0.715984	0.961789	0.949439	0.801634	0.968115	0.908973	0.93257	0.970123	0.900338	0.969019	0.951146	0.949941	0.762574	0.950945	0.945523	0.94984	0.936285	0.962994	0.939398	0.782255	0.950242	0.947732	0.877746	0.869411	0.955664	0.809065	0.978156	0.94241	0.72723	0.949338	0.955664	0.941808	0.931365	0.966609	0.961589	0.938193	0.567577	0.936486	0.964199	0.946125	0.945322	0.932771	0.967914	0.964701	0.946493	0.961589	0.956066
cg00904574	0.0569388	0.0285351	0.0281778	0.0393428	0.0341623	0.0316613	0.0303215	0.0288924	0.0355021	0.038003	0.0227293	0.0374671	0.0313933	0.0355914	0.0305895	0.0355021	0.0239798	0.0422904	0.0304108	0.0352341	0.0312147	0.038271	0.0241584	0.0364846	0.031572	0.031304	0.0280885	0.0394321	0.0236225	0.0222827	0.0224613	0.03577	0.0252303	0.0326438	0.0371098	0.0323759	0.0337157	0.036038	0.0336263	0.0271953	0.0614048	0.0302322	0.0296963	0.036038	0.0358593	0.0289817	0.0344004	0.0355914	0.0302322
cg00905170	0.0509354	0.0285645	0.027415	0.0272382	0.0152127	0.0187496	0.0269729	0.0287414	0.0321014	0.0340467	0.0227286	0.0322783	0.0229055	0.0265308	0.0173349	0.0218444	0.0247624	0.0166275	0.0235245	0.0315709	0.023436	0.0275035	0.0214907	0.0302446	0.0267077	0.0225518	0.0188381	0.028034	0.0168928	0.019457	0.0305982	0.0180423	0.019457	0.0212255	0.0247624	0.0178654	0.0302446	0.0368762	0.04227	0.0289182	0.0239666	0.0206065	0.0174233	0.0382026	0.0244971	0.0230823	0.0301561	0.0190149	0.0254697
cg00906183	0.0228317	0.0320452	0.0396003	0.0576587	0.0174879	0.0269778	0.0315845	0.0372969	0.0444834	0.0372969	0.029189	0.0309396	0.0474317	0.0389553	0.0272542	0.0325059	0.0289126	0.0348093	0.0285441	0.044207	0.0324138	0.0288205	0.0374812	0.0365598	0.0441149	0.0435621	0.0266093	0.0408902	0.0316767	0.029189	0.0408902	0.0365598	0.0393239	0.0371126	0.0391396	0.0337036	0.05038	0.0433778	0.0471553	0.0331508	0.0479845	0.0399688	0.0194228	0.0372969	0.0387711	0.0359149	0.0378497	0.0396924	0.0367441
cg00908551	0.0438023	0.0575167	0.0440661	0.0630553	0.0455166	0.0448573	0.0662201	0.0485496	0.0780884	0.0435386	0.0328572	0.0662201	0.0551431	0.0407693	0.0547475	0.045121	0.0325934	0.0535607	0.04011	0.0647696	0.189914	0.052242	0.0560662	0.0614728	0.0718905	0.0638465	0.0419562	0.0761103	0.0609453	0.0302198	0.0525057	0.0638465	0.0540881	0.0554068	0.506664	0.0778246	0.0685938	0.0890335	0.0920665	0.0415605	0.0378682	0.0598904	0.0211208	0.0558024	0.0470991	0.0539563	0.0648135	0.0361539	0.0869236
cg00910067	0.0382726	0.147137	0.108055	0.15269	0.125238	0.66055	0.126286	0.314572	0.152481	0.422913	0.119056	0.192611	0.609104	0.135192	0.0588091	0.0845845	0.0513698	0.0698108	0.0777739	0.261974	0.143575	0.0825937	0.406463	0.0833272	0.110989	0.115284	0.14567	0.100092	0.0633145	0.071592	0.140012	0.0760975	0.194706	0.0998821	0.603027	0.335214	0.10334	0.0637337	0.181714	0.0945384	0.0657244	0.241333	0.081022	0.0561896	0.11738	0.506316	0.117485	0.0657244	0.140222
cg00910168	0.85899	0.839818	0.523579	0.702033	0.498114	0.894623	0.795278	0.747348	0.739602	0.861217	0.751609	0.734373	0.851922	0.445536	0.89075	0.934613	0.519028	0.755385	0.637061	0.804186	0.765261	0.583419	0.656233	0.766133	0.745315	0.709004	0.839625	0.589519	0.855601	0.682861	0.808834	0.645776	0.623506	0.65236	0.894042	0.791889	0.326922	0.435466	0.813578	0.624571	0.733114	0.719559	0.657105	0.56415	0.582741	0.716266	0.842336	0.717525	0.466257
cg00911873	0.815561	0.932154	0.927474	0.933884	0.939886	0.934189	0.920352	0.932561	0.910382	0.93775	0.939886	0.927779	0.932561	0.926965	0.78392	0.921573	0.927067	0.938157	0.894612	0.928593	0.873654	0.9173	0.925541	0.920454	0.913943	0.920861	0.902548	0.890136	0.943752	0.831331	0.922184	0.914451	0.926762	0.816273	0.930628	0.937343	0.931238	0.901124	0.815866	0.921878	0.933884	0.937546	0.921573	0.919538	0.936732	0.92666	0.923777	0.911908	0.932459
cg00912191	0.0520199	0.111207	0.0596693	0.0786016	0.0379641	0.0631115	0.086251	0.12402	0.0703785	0.0854861	0.0502032	0.101645	0.0430318	0.103707	0.0901714	0.179956	0.0746813	0.0424581	0.146873	0.134347	0.107956	0.0433187	0.0633028	0.0489601	0.0406414	0.0628247	0.109199	0.0911275	0.152323	0.17508	0.076498	0.0939687	0.0811833	0.126315	0.0916056	0.0824263	0.112833	0.106044	0.119717	0.0432231	0.144195	0.0768805	0.104036	0.106618	0.0903626	0.0503944	0.0788566	0.0355736	0.0706653
cg00912942	0.914525	0.902747	0.718163	0.944865	0.91151	0.920555	0.94675	0.9443	0.929318	0.955324	0.929695	0.88541	0.927811	0.952026	0.937044	0.953816	0.881829	0.960789	0.891158	0.943546	0.812104	0.938081	0.944582	0.958622	0.957303	0.942321	0.908306	0.886541	0.966819	0.938929	0.943829	0.910662	0.907647	0.940154	0.921874	0.903312	0.907647	0.927339	0.946373	0.923476	0.92065	0.930449	0.950707	0.9182	0.817003	0.932051	0.936793	0.930355	0.956549
cg00915289	0.0941626	0.0255794	0.0332542	0.0407657	0.0535026	0.0424803	0.0438683	0.038153	0.0354587	0.0486038	0.0304782	0.0417455	0.0246813	0.0609324	0.0355403	0.0259876	0.0293352	0.0334991	0.0265592	0.0436233	0.0365201	0.0350504	0.0263142	0.0268041	0.0331726	0.042072	0.0269674	0.0579931	0.0259876	0.0315396	0.0236199	0.0264775	0.0258243	0.0278655	0.0442765	0.0410106	0.0319479	0.0412556	0.0370099	0.0309681	0.0437866	0.033989	0.0227218	0.0397043	0.032601	0.0369283	0.0305326	0.0286003	0.0397859
cg00916199	0.0304977	0.0334417	0.0227049	0.0429662	0.0271208	0.0211463	0.0227915	0.0331819	0.0382039	0.0328355	0.0322294	0.0418406	0.0290257	0.0412345	0.023311	0.0195012	0.0269476	0.0270342	0.0294587	0.0299782	0.0341344	0.028766	0.0268611	0.043226	0.0339612	0.0300648	0.0233976	0.0282464	0.033788	0.0263415	0.0231378	0.0241769	0.0238305	0.0308441	0.0453906	0.0288526	0.0340478	0.0416674	0.0493736	0.0239171	0.0318831	0.0410613	0.0206268	0.0246964	0.0238305	0.0233976	0.0367031	0.029805	0.0297184
cg00916635	0.454722	0.598989	0.077979	0.795501	0.306848	0.756652	0.785196	0.833835	0.857948	0.758919	0.73831	0.320863	0.868253	0.930803	0.71533	0.817244	0.779323	0.879691	0.63722	0.683797	0.63114	0.719143	0.906175	0.80931	0.881443	0.825076	0.750985	0.828786	0.864543	0.905453	0.909678	0.676584	0.631037	0.826519	0.712032	0.614137	0.889481	0.893397	0.820748	0.745729	0.904011	0.373005	0.84043	0.863513	0.788391	0.740061	0.863238	0.830641	0.748511
cg00917893	0.040605	0.0382463	0.0354664	0.0360561	0.0310859	0.0290642	0.0219038	0.0272951	0.0387517	0.0359718	0.0295696	0.0288957	0.0314229	0.0338658	0.0232516	0.0353821	0.0352137	0.0339501	0.0368142	0.0326022	0.0357191	0.0318441	0.0239255	0.0266212	0.0259473	0.0356349	0.0395941	0.0351294	0.022325	0.0332761	0.0279691	0.0417844	0.0235043	0.0360561	0.0249364	0.0261158	0.0228304	0.0376566	0.0315071	0.0284745	0.0379936	0.0327707	0.0353821	0.0360561	0.0272951	0.0294854	0.0361122	0.0315071	0.0398468
cg00918794	0.0294076	0.0526546	0.0427038	0.0406451	0.0493948	0.0409024	0.0298365	0.0531693	0.0487944	0.0583162	0.0429612	0.0790754	0.0319811	0.0557427	0.0378143	0.0475934	0.0359271	0.041074	0.0409024	0.0355839	0.0425323	0.0394441	0.0291503	0.065865	0.037128	0.0457062	0.0382432	0.0467356	0.0493091	0.0318953	0.0390152	0.0435617	0.0436475	0.0507674	0.0486228	0.0456204	0.0501669	0.0908276	0.0469072	0.0349835	0.0530835	0.0373854	0.0407309	0.0385863	0.0403877	0.0444195	0.0560001	0.0322384	0.0382432
cg00920960	0.0410499	0.0438104	0.127378	0.271091	0.0396278	0.173303	0.402507	0.173972	0.263228	0.0415518	0.0356962	0.0454834	0.0995221	0.0453161	0.286901	0.0368673	0.0921608	0.0368673	0.0377875	0.0408826	0.0556052	0.0427229	0.0431412	0.0482439	0.409283	0.168869	0.0361145	0.0469891	0.0326011	0.0690731	0.0863052	0.382347	0.194466	0.124199	0.436135	0.211949	0.0884802	0.0531793	0.306057	0.170375	0.0522592	0.0455671	0.193044	0.042221	0.15858	0.24198	0.14185	0.264315	0.116503
cg00922727	0.0306366	0.0453491	0.0567178	0.0531511	0.0275158	0.0413366	0.0383272	0.0251752	0.0811271	0.0377699	0.0268471	0.0435658	0.0325314	0.0319741	0.0211627	0.0362095	0.0542657	0.0437887	0.0567178	0.0457949	0.0420053	0.0440116	0.046798	0.0382158	0.0592813	0.0436772	0.0413366	0.0505876	0.0310825	0.0299679	0.0894864	0.0579438	0.036321	0.0607303	0.0700927	0.0314168	0.0339804	0.0386616	0.036321	0.0325314	0.0323085	0.0470209	0.0338689	0.0502532	0.0281846	0.0491387	0.0280731	0.0386616	0.0470209
cg00925717	0.413176	0.297916	0.430754	0.291575	0.290462	0.591071	0.364113	0.447776	0.213363	0.49517	0.323282	0.236281	0.647811	0.414177	0.4233	0.463463	0.279671	0.42508	0.169306	0.389145	0.17676	0.595633	0.518534	0.233611	0.493501	0.341973	0.454451	0.340193	0.145609	0.229161	0.374793	0.280004	0.214476	0.414177	0.495281	0.380689	0.176427	0.25831	0.383693	0.373235	0.397823	0.272773	0.252302	0.363	0.351096	0.376017	0.635128	0.473809	0.222152
cg00929855	0.763673	0.395353	0.705158	0.045718	0.0601509	0.695648	0.534983	0.764232	0.183334	0.496048	0.223948	0.0913663	0.777323	0.362348	0.713997	0.0415783	0.448498	0.806188	0.0603747	0.0804018	0.537109	0.0934921	0.750806	0.10289	0.507908	0.393451	0.366935	0.660405	0.760316	0.106806	0.82767	0.0481794	0.326992	0.663649	0.60368	0.359662	0.0684303	0.171922	0.590925	0.406653	0.82588	0.0842058	0.469196	0.452414	0.615316	0.500188	0.179418	0.75819	0.0884574
cg00930078	0.142599	0.0258974	0.026883	0.0164351	0.0157451	0.0184064	0.0152523	0.0182093	0.0291501	0.0172236	0.0179136	0.0166322	0.0176179	0.0288544	0.0144638	0.020082	0.0229404	0.0194906	0.0208705	0.0172236	0.0251089	0.0158437	0.0198849	0.0278687	0.0195892	0.0250103	0.0173222	0.0167308	0.014858	0.0188007	0.0169279	0.0179136	0.0152523	0.0234332	0.0290515	0.0195892	0.0173222	0.0242218	0.0190964	0.0234332	0.0222505	0.0147595	0.0159423	0.0225462	0.0169279	0.0152523	0.0236961	0.0173222	0.0231375
cg00930194	0.0851742	0.535846	0.0506414	0.138525	0.122229	0.178781	0.561745	0.752452	0.568633	0.665732	0.561357	0.299452	0.585511	0.257062	0.0871142	0.0512234	0.470466	0.768457	0.14939	0.535652	0.0597596	0.109522	0.404602	0.469884	0.185474	0.327582	0.109619	0.662337	0.798528	0.504902	0.0519024	0.210986	0.437971	0.484144	0.693668	0.37036	0.128728	0.191876	0.188675	0.576102	0.599964	0.103411	0.60559	0.0828461	0.371718	0.547098	0.45763	0.168402	0.447283
cg00930873	0.799376	0.372266	0.553918	0.323001	0.565312	0.604485	0.3026	0.559669	0.223168	0.702364	0.409703	0.268852	0.696613	0.1369	0.720486	0.0870918	0.0524759	0.745336	0.0512823	0.175965	0.0960984	0.714192	0.680662	0.227943	0.0454226	0.523534	0.469494	0.118669	0.394511	0.5983	0.707139	0.42815	0.219261	0.360655	0.601772	0.282525	0.258326	0.472641	0.500855	0.354253	0.931111	0.209278	0.565529	0.331356	0.0589868	0.411222	0.0542483	0.337541	0.415346
cg00932276	0.852046	0.537892	0.55269	0.661701	0.474976	0.546515	0.578878	0.726853	0.561738	0.801905	0.683418	0.278883	0.746228	0.107807	0.779975	0.285377	0.218416	0.847255	0.635407	0.564187	0.331792	0.440271	0.769861	0.738244	0.621035	0.594421	0.614222	0.0830026	0.858753	0.128566	0.441549	0.502655	0.436332	0.664682	0.704284	0.530972	0.37991	0.0391425	0.617735	0.585585	0.553754	0.387043	0.529695	0.158906	0.364155	0.559609	0.722559	0.533208	0.666279
cg00933411	0.0694584	0.345467	0.218666	0.115836	0.213629	0.157437	0.363271	0.486771	0.280764	0.370567	0.269821	0.421287	0.352154	0.19044	0.0856993	0.14441	0.155961	0.296657	0.124434	0.251235	0.207115	0.0495698	0.222835	0.0987268	0.124782	0.131122	0.101245	0.269647	0.158566	0.101245	0.104633	0.248629	0.369872	0.0592101	0.224225	0.270689	0.137462	0.155266	0.271645	0.141457	0.279722	0.219448	0.221532	0.0913446	0.256359	0.266868	0.378238	0.310466	0.206073
cg00935388	0.753077	0.907961	0.926572	0.882735	0.872415	0.826638	0.914664	0.898347	0.903992	0.954267	0.922162	0.94924	0.95612	0.948887	0.827608	0.918722	0.868887	0.929747	0.88591	0.929747	0.906991	0.884675	0.934951	0.89032	0.896054	0.810321	0.870298	0.928247	0.727322	0.890497	0.905844	0.922514	0.920045	0.901698	0.9129	0.90752	0.827079	0.884058	0.921632	0.850541	0.841985	0.918192	0.791269	0.888645	0.884058	0.905668	0.772805	0.852834	0.924631
cg00935430	0.0521113	0.121731	0.0435128	0.0554397	0.0476733	0.0560869	0.0320481	0.0394447	0.0369483	0.0518339	0.0360238	0.0426807	0.0475809	0.0423108	0.0326029	0.0436052	0.0318632	0.0319557	0.0299216	0.0468412	0.0531283	0.0426807	0.041941	0.0338973	0.0319557	0.0387975	0.0306613	0.0400919	0.0264083	0.0271479	0.0383352	0.0406466	0.0188268	0.0346369	0.0249289	0.0416636	0.0305688	0.0423108	0.0620966	0.0470261	0.0547925	0.0426807	0.0347294	0.0505395	0.0481356	0.0359313	0.0363011	0.0412014	0.0513716
cg00936626	0.755543	0.628937	0.608041	0.642765	0.269399	0.83165	0.655364	0.770806	0.623405	0.750524	0.698283	0.579052	0.772752	0.736491	0.777259	0.55621	0.642355	0.708732	0.686504	0.602304	0.644814	0.750319	0.726452	0.579359	0.780434	0.713751	0.703405	0.673905	0.738847	0.573828	0.668168	0.654545	0.613265	0.660383	0.719077	0.539718	0.446914	0.537977	0.723072	0.482151	0.851317	0.553444	0.628834	0.67247	0.635288	0.536133	0.698044	0.74151	0.71078
cg00940278	0.0288437	0.0223229	0.0234785	0.0335486	0.0177006	0.0243865	0.0217451	0.0249642	0.0441964	0.024469	0.0181133	0.0328882	0.0219928	0.0335486	0.023561	0.0233134	0.0183609	0.0169577	0.0214975	0.0251293	0.0366026	0.0177831	0.023561	0.0346216	0.0261198	0.0291739	0.0173704	0.0322279	0.0195165	0.0167101	0.0200943	0.0162149	0.0262849	0.020507	0.0256246	0.0186086	0.0208372	0.0308247	0.0327231	0.019434	0.0251293	0.159259	0.0176181	0.025542	0.0173704	0.0237261	0.0268902	0.0186086	0.0305771
cg00940891	0.0177443	0.0169765	0.0161233	0.0157821	0.017403	0.0152702	0.0135639	0.0168912	0.0179149	0.0186828	0.0203038	0.0149289	0.0139905	0.0200478	0.016038	0.016038	0.0199625	0.0197919	0.0171471	0.0150142	0.0189387	0.017659	0.0168058	0.0178296	0.0139905	0.0193653	0.0148436	0.0197065	0.0139051	0.0139051	0.0156114	0.0226073	0.0140758	0.0186828	0.0168912	0.0164646	0.0150142	0.0172324	0.0169765	0.0180003	0.0233751	0.0185975	0.0196212	0.0172324	0.0180856	0.014673	0.0227779	0.0180003	0.0188534
cg00941229	0.0160269	0.015424	0.0263771	0.0157255	0.0125099	0.015625	0.015223	0.0153235	0.0223577	0.0155245	0.0133138	0.0146201	0.0132133	0.0170318	0.0111031	0.015424	0.0148211	0.0148211	0.0157255	0.0172328	0.0204484	0.0124094	0.0138162	0.0186396	0.0139167	0.0177352	0.015424	0.015424	0.0126104	0.0142182	0.0130123	0.0126104	0.0124094	0.0245684	0.0165294	0.0138162	0.0144191	0.0200464	0.0155245	0.0207499	0.0163284	0.0169313	0.0131128	0.0327079	0.011304	0.015223	0.0175343	0.0125099	0.0164289
cg00943245	0.764854	0.772366	0.431357	0.401097	0.834051	0.468071	0.798818	0.824423	0.793316	0.863676	0.785592	0.804954	0.838177	0.830348	0.676084	0.787602	0.792893	0.856693	0.342481	0.829395	0.723696	0.857434	0.542558	0.633974	0.812784	0.541394	0.309046	0.708989	0.901025	0.864628	0.361314	0.755755	0.716396	0.735017	0.803156	0.699149	0.846747	0.834368	0.448603	0.784428	0.841034	0.819979	0.690791	0.782524	0.643708	0.646353	0.810104	0.819767	0.77353
cg00943950	0.144401	0.0534259	0.049723	0.0504804	0.0388666	0.0357528	0.0335647	0.0425696	0.0421488	0.0471983	0.0450101	0.0491339	0.0408864	0.0469458	0.0272528	0.0488814	0.0491339	0.0430745	0.028431	0.0506487	0.0466933	0.0374359	0.0371835	0.0407181	0.0410547	0.0477032	0.0489656	0.0562873	0.0383617	0.0347429	0.0311241	0.0339013	0.0355003	0.0351637	0.0408864	0.052921	0.047619	0.0514061	0.0610843	0.0318815	0.0466933	0.043327	0.0339855	0.0550249	0.0403815	0.0363419	0.044954	0.0282627	0.0539309
cg00945507	0.0726974	0.181882	0.107278	0.152128	0.14616	0.128606	0.225854	0.0999057	0.17056	0.203561	0.114124	0.214005	0.0727852	0.0622529	0.103768	0.130537	0.0883202	0.0842829	0.0797189	0.180039	0.148881	0.0680457	0.0572501	0.098677	0.0598832	0.0750672	0.0943763	0.130274	0.0576889	0.0786657	0.0913044	0.105786	0.261049	0.062604	0.147301	0.194784	0.0598832	0.0673435	0.140192	0.207861	0.0674313	0.149758	0.0592688	0.0788412	0.0831419	0.168453	0.0524228	0.0689233	0.100169
cg00945862	0.923662	0.907393	0.573607	0.807229	0.921108	0.821606	0.958374	0.937471	0.849886	0.943619	0.917608	0.913352	0.945132	0.949861	0.690891	0.909663	0.888098	0.933215	0.65022	0.862939	0.833996	0.905312	0.820471	0.819998	0.905407	0.873816	0.611252	0.917514	0.959698	0.609455	0.340459	0.871073	0.892544	0.683041	0.868614	0.881004	0.776017	0.824727	0.856696	0.900205	0.927067	0.823403	0.881004	0.869276	0.91373	0.868519	0.798969	0.900678	0.900962
cg00947019	0.0362371	0.052613	0.0833999	0.0510573	0.0223994	0.0242007	0.0409042	0.027394	0.0504842	0.03288	0.0440975	0.036974	0.0366465	0.0419687	0.0195336	0.0283766	0.022645	0.0286222	0.0278853	0.0297686	0.0814348	0.0611285	0.030833	0.0473727	0.0368921	0.0653044	0.030178	0.0531862	0.0342719	0.0413136	0.0190423	0.02199	0.025347	0.0276397	0.0448344	0.0193698	0.0354183	0.0420505	0.0558064	0.0366465	0.0309967	0.0491741	0.0350089	0.0280491	0.0244464	0.0264115	0.0659867	0.0598185	0.078569
cg00947275	0.0261791	0.0464628	0.126135	0.360177	0.0343706	0.510549	0.443945	0.211463	0.290549	0.0413919	0.0300798	0.0409043	0.235549	0.0358334	0.388847	0.0439273	0.083617	0.0321277	0.0311525	0.0355408	0.0432447	0.0222784	0.0264717	0.044805	0.528882	0.160558	0.0313476	0.0386614	0.0273494	0.0673316	0.413031	0.457304	0.268608	0.239548	0.479343	0.379973	0.269583	0.0402217	0.158803	0.0929787	0.0312501	0.044805	0.26734	0.0482181	0.183573	0.412641	0.536976	0.395283	0.11414
cg00948524	0.414507	0.0441802	0.0343284	0.0212617	0.0255135	0.123929	0.0230246	0.0434543	0.0173209	0.0444914	0.0291432	0.0637803	0.0188765	0.0690692	0.0255135	0.0465654	0.0300765	0.0233357	0.0474988	0.0304913	0.161573	0.0614988	0.0441802	0.0236469	0.0724914	0.0368173	0.0250987	0.0388913	0.0152468	0.00964683	0.0756025	0.0181506	0.0240617	0.0274839	0.334655	0.0127579	0.0116172	0.0255135	0.0532025	0.0394099	0.0286247	0.047084	0.0352617	0.0261358	0.0227135	0.0266543	0.0200518	0.022195	0.137099
cg00950418	0.0303955	0.0536256	0.0331831	0.0711876	0.032161	0.0467495	0.0384796	0.0633823	0.0460061	0.0542761	0.0443336	0.0515814	0.0725814	0.0572495	0.0451699	0.0395946	0.0282583	0.063661	0.0350415	0.0456345	0.0362495	0.0550194	0.0501876	0.0392229	0.0540902	0.035599	0.0459132	0.057807	0.0455415	0.0347628	0.0355061	0.0296521	0.0394088	0.0495371	0.060223	0.0494442	0.0372716	0.0564132	0.0622672	0.0413601	0.0390371	0.0412672	0.0365283	0.0511168	0.0360637	0.0377362	0.0924354	0.0231477	0.0491654
cg00950621	0.0255591	0.0266993	0.021963	0.0496792	0.0304708	0.0242434	0.0222261	0.0320496	0.0299445	0.0319618	0.0333652	0.0335406	0.0273132	0.0315233	0.0221384	0.0265239	0.0305585	0.0317864	0.0313479	0.0271378	0.0300322	0.0285412	0.0195071	0.0275764	0.0312602	0.0288043	0.0271378	0.0395926	0.0177529	0.0254713	0.0209104	0.0220507	0.0188931	0.0390663	0.0243311	0.0319618	0.0281026	0.0312602	0.0297691	0.0359965	0.0302077	0.0368736	0.0339792	0.0358211	0.0224015	0.0218753	0.04237	0.0361719	0.0289797
cg00951770	0.799622	0.829145	0.834926	0.798487	0.719518	0.853507	0.82481	0.810771	0.798487	0.8597	0.786306	0.803958	0.799932	0.73046	0.716421	0.819545	0.848655	0.820371	0.75606	0.785996	0.820577	0.829042	0.853094	0.790435	0.882617	0.808396	0.77299	0.794667	0.898204	0.818203	0.851546	0.80788	0.79828	0.826152	0.751105	0.881894	0.768035	0.807055	0.846178	0.812526	0.753273	0.819648	0.795493	0.840397	0.787545	0.730976	0.855296	0.818513	0.880243
cg00953256	0.385751	0.493708	0.407865	0.493808	0.3951	0.392788	0.61443	0.631418	0.679164	0.308755	0.482249	0.677455	0.618551	0.313579	0.266034	0.524768	0.460637	0.479836	0.445359	0.552008	0.507378	0.387661	0.412087	0.477625	0.298703	0.379419	0.419324	0.380524	0.69786	0.388264	0.483757	0.423044	0.568091	0.34474	0.488983	0.613525	0.316193	0.348158	0.640364	0.528889	0.687607	0.660065	0.360019	0.500744	0.416711	0.500644	0.340317	0.295587	0.575731
cg00953277	0.0526269	0.0207194	0.0218878	0.021798	0.0213486	0.0227866	0.0198206	0.0257527	0.0256628	0.0201801	0.0206295	0.0193712	0.0263818	0.0265616	0.0233259	0.0213486	0.0226968	0.0203599	0.0182027	0.0227866	0.0229664	0.0188319	0.0185623	0.0278199	0.0169444	0.0279098	0.019551	0.0206295	0.0190117	0.0249438	0.0182027	0.0159557	0.0170343	0.0216182	0.029258	0.0215283	0.0196408	0.0237753	0.0224271	0.0261122	0.027011	0.0203599	0.0200004	0.0244045	0.0182926	0.018742	0.0274604	0.0214384	0.0210789
cg00954003	0.019266	0.0157551	0.0164572	0.0185638	0.0121563	0.0127708	0.0134729	0.0145262	0.0204948	0.0182127	0.0136485	0.0147896	0.0119808	0.0132096	0.0150529	0.0144385	0.0153162	0.0127708	0.0152284	0.0137363	0.0175105	0.0144385	0.0143507	0.0189149	0.0153162	0.0224258	0.0154917	0.0160184	0.011893	0.0119808	0.0121563	0.0116297	0.0114542	0.0167206	0.0139996	0.0132096	0.0135607	0.0181249	0.0160184	0.0191782	0.0147018	0.0145262	0.0159306	0.017335	0.0145262	0.0141751	0.0165158	0.0167206	0.0189149
cg00954566	0.0400449	0.0222085	0.0153561	0.0240224	0.0148523	0.022007	0.0157592	0.0296656	0.0253324	0.0252317	0.0325879	0.0286579	0.0226116	0.0237201	0.0191854	0.0199916	0.0190846	0.0212008	0.023317	0.0204954	0.0203947	0.0366187	0.0189839	0.0215031	0.0167669	0.030774	0.0334948	0.0247278	0.0154569	0.0157592	0.0209993	0.0305725	0.0164646	0.01848	0.0231155	0.0189839	0.0163638	0.025937	0.0278517	0.0211001	0.0416573	0.0314794	0.0147515	0.0269448	0.0156584	0.0191854	0.0229475	0.0241232	0.0295648
cg00955230	0.0461403	0.0432485	0.0461403	0.0621298	0.0566015	0.0407821	0.0532845	0.0330425	0.0463104	0.0312564	0.0319368	0.044099	0.0470758	0.0336378	0.042313	0.030576	0.0382305	0.0354239	0.032362	0.0469908	0.0539649	0.035679	0.0424831	0.038911	0.0485217	0.0480964	0.0317667	0.0594082	0.0351687	0.0297255	0.0355089	0.0332126	0.0332126	0.0361043	0.0492871	0.0436738	0.03738	0.0458851	0.0516686	0.0277693	0.044099	0.0409522	0.0402718	0.0279394	0.0383156	0.0448645	0.0457434	0.0424831	0.0505629
cg00955451	0.788194	0.785006	0.32891	0.693215	0.705417	0.890428	0.501938	0.720477	0.753346	0.928683	0.831836	0.735318	0.910765	0.274275	0.537995	0.885371	0.285707	0.686619	0.57735	0.707506	0.408498	0.214913	0.601534	0.635612	0.854591	0.84008	0.584715	0.591091	0.911095	0.562069	0.427736	0.457637	0.802265	0.252839	0.820623	0.713002	0.46764	0.247232	0.648804	0.813807	0.35947	0.783357	0.259105	0.791711	0.382225	0.812488	0.737956	0.434112	0.890758
cg00958517	0.0273776	0.0267272	0.0227317	0.0247759	0.02459	0.0231963	0.0386208	0.0249617	0.0288643	0.0391783	0.0221742	0.0336032	0.0243113	0.0368553	0.0178999	0.0236609	0.0306298	0.0286785	0.0309085	0.031559	0.0270059	0.0250546	0.028121	0.0514436	0.0257051	0.0291431	0.0412225	0.0488419	0.0220812	0.0259838	0.0228246	0.0207804	0.0214308	0.0261697	0.0215237	0.0227317	0.023475	0.02459	0.0328598	0.029236	0.0415942	0.0295147	0.0254263	0.0356474	0.0235679	0.0225458	0.0364527	0.0229175	0.026913
cg00958560	0.566223	0.669093	0.496504	0.63874	0.398504	0.811432	0.687222	0.693541	0.719543	0.839195	0.702036	0.512458	0.829872	0.576997	0.688465	0.723687	0.811432	0.853906	0.440356	0.687015	0.565187	0.528929	0.776313	0.567259	0.623718	0.728142	0.534938	0.593158	0.872242	0.515669	0.490289	0.677173	0.62693	0.42606	0.681317	0.568813	0.519295	0.729385	0.577204	0.751968	0.634389	0.648478	0.553067	0.794131	0.483037	0.731664	0.846723	0.722444	0.79206
cg00960702	0.0213057	0.0385198	0.0294509	0.0416268	0.0282753	0.0298708	0.0220614	0.041039	0.0431383	0.0328937	0.0279394	0.0307105	0.0344052	0.0373442	0.0417107	0.023153	0.0281074	0.0396954	0.0230691	0.0271837	0.0311303	0.0222293	0.0344892	0.0368404	0.0236569	0.0334815	0.026176	0.0360846	0.0199621	0.0213896	0.023237	0.0180308	0.0217255	0.0456574	0.0342373	0.0312143	0.0295349	0.034909	0.0315502	0.0373442	0.0383519	0.0252523	0.0247485	0.0455734	0.0242447	0.0259241	0.029227	0.0228171	0.0329777
cg00962459	0.444615	0.562123	0.373536	0.535774	0.518987	0.586772	0.654557	0.465758	0.720855	0.821257	0.587516	0.639683	0.721386	0.843781	0.327425	0.537368	0.504325	0.857487	0.531099	0.594422	0.731798	0.250185	0.414972	0.668475	0.5107	0.405941	0.338369	0.51495	0.525149	0.592616	0.257622	0.534712	0.491363	0.249547	0.541193	0.627783	0.390642	0.369711	0.417628	0.610996	0.551392	0.633202	0.53928	0.343575	0.38193	0.579866	0.231946	0.593253	0.727442
cg00962635	0.209484	0.443767	0.172116	0.293562	0.0988504	0.501498	0.541175	0.610873	0.291987	0.560804	0.117009	0.138842	0.563428	0.498559	0.319278	0.0646317	0.139682	0.0979058	0.338907	0.468959	0.414377	0.181143	0.521652	0.283065	0.585471	0.276872	0.510106	0.418366	0.363993	0.0960164	0.108717	0.401046	0.216727	0.407554	0.419205	0.455209	0.192375	0.210114	0.622314	0.348144	0.195629	0.163929	0.208959	0.0973809	0.605624	0.351503	0.499644	0.582952	0.463711
cg00964109	0.0389654	0.0223361	0.0236798	0.0250236	0.0184727	0.0178848	0.0189766	0.0222521	0.0248557	0.0274592	0.0234279	0.0256115	0.0221681	0.0176328	0.0199004	0.0217481	0.0220841	0.0184727	0.0196485	0.0207403	0.0253596	0.0202364	0.0215802	0.0254436	0.0235959	0.0249396	0.0256115	0.0347661	0.0223361	0.0218321	0.0187246	0.0178008	0.0211602	0.0205723	0.0178848	0.0193125	0.0204044	0.0364458	0.0278792	0.0199844	0.0329184	0.0240158	0.0207403	0.0235119	0.0169609	0.0204044	0.0277672	0.0239318	0.0188926
cg00967316	0.157407	0.902962	0.911605	0.427446	0.419719	0.570497	0.924415	0.826912	0.846128	0.938751	0.69657	0.863107	0.91252	0.506648	0.677151	0.873478	0.727478	0.948105	0.605981	0.704093	0.647361	0.667187	0.772315	0.787769	0.903166	0.520678	0.468928	0.510206	0.936311	0.807188	0.218003	0.810747	0.869004	0.648581	0.722801	0.908554	0.600694	0.540504	0.618791	0.887712	0.785939	0.782787	0.734696	0.755234	0.835758	0.901437	0.741678	0.87663	0.908656
cg00968475	0.0736354	0.17841	0.210503	0.702389	0.0953455	0.673966	0.393413	0.252875	0.389743	0.782517	0.0991212	0.109295	0.231899	0.0781453	0.391421	0.0782501	0.164042	0.109609	0.0802429	0.118104	0.588385	0.853206	0.153029	0.141388	0.465675	0.428443	0.53112	0.162468	0.0691256	0.107302	0.274375	0.475219	0.342652	0.263363	0.453614	0.422046	0.305839	0.124817	0.512347	0.24375	0.0719574	0.108036	0.31769	0.0552815	0.3093	0.432638	0.449874	0.315907	0.217425
cg00969271	0.83183	0.87795	0.725742	0.851019	0.598611	0.844041	0.913385	0.891252	0.802718	0.878168	0.803372	0.872062	0.909896	0.913276	0.856907	0.888199	0.809587	0.809696	0.677877	0.83739	0.612022	0.824415	0.808715	0.665883	0.888635	0.770881	0.638844	0.887763	0.931703	0.851782	0.933665	0.88242	0.86334	0.847312	0.889398	0.86443	0.846985	0.793777	0.802827	0.826814	0.888199	0.790834	0.83521	0.796939	0.887545	0.877405	0.855635	0.897685	0.838371
cg00969446	0.518418	0.4681	0.484631	0.53433	0.316214	0.410858	0.679086	0.708326	0.435036	0.73767	0.446815	0.620605	0.632074	0.684872	0.753375	0.322104	0.375935	0.46407	0.250501	0.368806	0.539083	0.722275	0.46779	0.277985	0.660074	0.569873	0.489591	0.536706	0.532057	0.505193	0.703987	0.56481	0.464483	0.514182	0.526891	0.519451	0.298029	0.391744	0.681049	0.373869	0.73984	0.451258	0.374695	0.567497	0.389677	0.404762	0.636413	0.388954	0.530404
cg00970325	0.124009	0.381669	0.655727	0.660443	0.478773	0.709424	0.374166	0.723786	0.587989	0.719392	0.595921	0.275882	0.779198	0.266022	0.697206	0.443082	0.0613084	0.787558	0.591205	0.380811	0.388314	0.482096	0.814567	0.454979	0.678556	0.645223	0.536114	0.323363	0.892487	0.882412	0.803421	0.634505	0.210717	0.786379	0.614999	0.406963	0.0230452	0.303106	0.546618	0.587025	0.736862	0.535471	0.771588	0.475772	0.00804006	0.516393	0.45673	0.620143	0.710817
cg00971396	0.0339188	0.0811219	0.0422632	0.0430813	0.0415269	0.0426722	0.0583793	0.0493805	0.0402998	0.0641059	0.0390727	0.104601	0.0404634	0.0643513	0.0304829	0.0592792	0.0631242	0.0340824	0.0555978	0.0397271	0.0497077	0.0550252	0.0252472	0.0466808	0.0428358	0.053389	0.046599	0.0591974	0.135197	0.0387455	0.0477443	0.0710595	0.0623879	0.0353913	0.0534708	0.0645149	0.0476625	0.0540435	0.0916751	0.0394817	0.0443902	0.0581339	0.0621425	0.0505258	0.0577248	0.0439812	0.0580248	0.0393181	0.0832489
cg00973286	0.0313817	0.0299439	0.0350659	0.02608	0.0234741	0.0232944	0.0244625	0.0310222	0.0327295	0.0202392	0.0232944	0.0473765	0.0214073	0.0291352	0.0249118	0.0224856	0.0299439	0.0187116	0.0278772	0.0210479	0.0368631	0.0256307	0.0180826	0.0315614	0.0175434	0.0461185	0.0239234	0.0399183	0.019071	0.0329991	0.0154766	0.0259003	0.0136795	0.0282366	0.0310222	0.0241031	0.0286859	0.0312019	0.0427937	0.0239234	0.0253611	0.0406371	0.0244625	0.0312918	0.0220363	0.0245524	0.0258104	0.0221262	0.0391095
cg00973334	0.0236359	0.0260535	0.0292214	0.0366409	0.027304	0.0213017	0.0332229	0.0488122	0.0445606	0.0442271	0.0395587	0.029138	0.0322225	0.0189675	0.0221354	0.0342233	0.022969	0.0259702	0.0247197	0.0384749	0.0259702	0.0338899	0.0408925	0.0265537	0.0261369	0.0320558	0.0243029	0.0292214	0.0336398	0.0216352	0.0250531	0.0709873	0.0348902	0.0423931	0.0258034	0.0279709	0.027304	0.0383916	0.0279709	0.020218	0.0354738	0.0308053	0.0303052	0.0341399	0.0311388	0.027304	0.036502	0.0583158	0.0302218
cg00973677	0.458657	0.267606	0.201548	0.324911	0.426289	0.239513	0.472093	0.50782	0.405322	0.641158	0.412447	0.157983	0.72676	0.209487	0.596067	0.276156	0.46395	0.617544	0.357177	0.367661	0.257529	0.576321	0.574591	0.520543	0.40064	0.254578	0.205924	0.334479	0.687471	0.346693	0.02495	0.479014	0.188315	0.424457	0.452041	0.323893	0.382216	0.26842	0.136303	0.464663	0.772563	0.371224	0.531943	0.375397	0.231574	0.47647	0.486241	0.607976	0.493671
cg00974864	0.836584	0.748712	0.239382	0.313799	0.785765	0.441416	0.783385	0.769412	0.580833	0.826131	0.796529	0.678331	0.824785	0.86277	0.439346	0.702447	0.539329	0.821266	0.554543	0.731841	0.673673	0.805327	0.542123	0.492546	0.860907	0.470707	0.255942	0.496065	0.814332	0.833686	0.174072	0.790837	0.700894	0.648626	0.733808	0.614677	0.890923	0.629892	0.705862	0.751092	0.637344	0.686921	0.251905	0.666428	0.83617	0.641691	0.832237	0.716937	0.715074
cg00977690	0.0790617	0.0562475	0.0413644	0.0489039	0.0535059	0.0363708	0.041854	0.0357833	0.0502747	0.0670182	0.0537996	0.0724035	0.0506664	0.0669203	0.0296146	0.0793555	0.0385249	0.0566392	0.0608495	0.0529184	0.0751451	0.0378395	0.0468477	0.0652557	0.0362728	0.0605558	0.0690744	0.0679973	0.0401894	0.047631	0.0350979	0.0407769	0.0335312	0.045281	0.0422457	0.0329437	0.0379374	0.0980572	0.0389165	0.0505684	0.0658432	0.0573246	0.0329437	0.0605558	0.0511559	0.038427	0.0524615	0.0538975	0.0551704
cg00979348	0.02721	0.0434704	0.0411008	0.0525403	0.0379141	0.0439607	0.0325212	0.0500072	0.0469839	0.0448595	0.036525	0.0554819	0.0361981	0.0283539	0.0325212	0.0553184	0.0420813	0.0437155	0.0568709	0.0474742	0.0411825	0.0369335	0.03963	0.0460034	0.0340737	0.0358713	0.0432253	0.0423264	0.0450229	0.0355445	0.0361164	0.0548282	0.03342	0.053194	0.0429801	0.0527854	0.0419996	0.054583	0.0472291	0.0393849	0.0601394	0.040202	0.0420813	0.0400385	0.0431435	0.039058	0.0385133	0.0400385	0.0344005
cg00980978	0.0164932	0.055104	0.0415169	0.249527	0.0428854	0.0662474	0.427039	0.388819	0.0358475	0.0291028	0.0404417	0.0952788	0.0303735	0.0501188	0.363502	0.222743	0.032133	0.324989	0.0271478	0.0383889	0.146597	0.0390732	0.49429	0.0379002	0.129198	0.0436674	0.123919	0.0447426	0.037216	0.0176662	0.0318398	0.0298848	0.137604	0.051585	0.22724	0.233691	0.0460134	0.0462089	0.156958	0.0338925	0.250015	0.0686911	0.0139517	0.0319375	0.0402462	0.0646834	0.0435045	0.032524	0.252752
cg00981643	0.0269166	0.263481	0.269668	0.296512	0.100633	0.439646	0.281936	0.234015	0.369914	0.0810244	0.110595	0.163969	0.401687	0.0600524	0.163235	0.0829119	0.175189	0.0358297	0.0770397	0.0449525	0.141214	0.0681266	0.23412	0.119298	0.502981	0.336778	0.149288	0.187248	0.0532365	0.0916153	0.429999	0.236008	0.341916	0.186199	0.434508	0.422344	0.124646	0.0411776	0.306893	0.207066	0.0262874	0.137649	0.170994	0.0458963	0.297351	0.399694	0.164423	0.314758	0.225836
cg00983520	0.260576	0.280756	0.169611	0.171911	0.0842917	0.302713	0.21248	0.206311	0.295603	0.293198	0.132597	0.349241	0.316828	0.0905652	0.142008	0.335753	0.0898333	0.11775	0.214675	0.319024	0.278247	0.149954	0.163024	0.312646	0.0999754	0.297172	0.149745	0.352274	0.453904	0.317038	0.220321	0.135002	0.187909	0.107294	0.30815	0.293303	0.0741496	0.224817	0.378622	0.197528	0.34119	0.131238	0.0754043	0.238724	0.132807	0.301668	0.203523	0.0630665	0.138139
cg00983899	0.680571	0.682938	0.462054	0.745752	0.455645	0.620519	0.758472	0.719818	0.688855	0.673472	0.770305	0.683332	0.743484	0.833711	0.369362	0.622195	0.505147	0.746343	0.616081	0.577624	0.52832	0.602177	0.613517	0.699011	0.786872	0.497652	0.633634	0.609475	0.695954	0.73806	0.295504	0.539265	0.67219	0.659568	0.584428	0.724452	0.489862	0.664005	0.663315	0.699997	0.831739	0.733327	0.656511	0.472901	0.611249	0.607009	0.63199	0.713309	0.66864
[truncated: 21,997 more rows]
[truncated: 223 more columns]
