# Supplementary material for: Molecular subtypes based on DNA methylation predict prognosis in colon adenocarcinoma patients
Source: Aging (Albany NY). 2019 Dec 18;11(24):11880–92. doi: 10.18632/aging.102492 (PMC6949097; doi:10.18632/aging.102492)
Supplement: Supplementary Table 3 [file aging-11-102492-s008..xlsx]

## Sheet: Supplementary Table 4
Supplementary Table 3. The clinical information of training dataset.
row.names(test.clinical)	A1_OS	A2_Event	A3_T	A4_N	A5_M	A6_Stage	additional_studies	additional_studies.additional_study.disease_code	additional_studies.additional_study.project_code	age_at_initial_pathologic_diagnosis	anatomic_neoplasm_subdivision	bcr_patient_barcode	bcr_patient_uuid	braf_gene_analysis_performed	braf_gene_analysis_result	circumferential_resection_margin	colon_polyps_present	day_of_form_completion	days_to_birth	days_to_death	days_to_initial_pathologic_diagnosis	days_to_last_followup	days_to_last_known_alive	drugs	drugs.drug.bcr_drug_barcode	drugs.drug.bcr_drug_uuid	drugs.drug.clinical_trail_drug_classification	drugs.drug.day_of_form_completion	drugs.drug.days_to_drug_therapy_end	drugs.drug.days_to_drug_therapy_start	drugs.drug.drug_name	drugs.drug.measure_of_response	drugs.drug.month_of_form_completion	drugs.drug.number_cycles	drugs.drug.prescribed_dose	drugs.drug.prescribed_dose_units	drugs.drug.regimen_indication	drugs.drug.regimen_indication_notes	drugs.drug.regimen_number	drugs.drug.route_of_administrations.route_of_administration	drugs.drug.therapy_ongoing	drugs.drug.therapy_types.therapy_type	drugs.drug.therapy_types.therapy_type_notes	drugs.drug.total_dose	drugs.drug.total_dose_units	drugs.drug.tx_on_clinical_trial	drugs.drug.year_of_form_completion	ethnicity	follow_ups
TCGA-A6-5666	995	0	T4b	N0	M0	Stage IIC	NA			78	Sigmoid Colon	TCGA-A6-5666	25c3201a-3dd5-4edf-ad09-104e5c10663e	NO	Not Available	Not Available	NO	26	-28514	Not Applicable	0	244	Not Available	NA																								NOT HISPANIC OR LATINO	NA
TCGA-A6-5664	672	0	T4a	N2a	MX	Stage IIIC	NA			80	Cecum	TCGA-A6-5664	f88c0259-58ff-4bcc-a777-7705cdbd8213	NO	Not Available	Not Available	YES	31	-29426	Not Applicable	0	362	Not Available	NA	TCGA-A6-5664-D15804;TCGA-A6-5664-D15810;TCGA-A6-5664-D15776;TCGA-A6-5664-D15775;TCGA-A6-5664-D15809;TCGA-A6-5664-D15811;TCGA-A6-5664-D15774;TCGA-A6-5664-D15777;TCGA-A6-5664-D15812;TCGA-A6-5664-D33770;TCGA-A6-5664-D33771;TCGA-A6-5664-D33772;TCGA-A6-5664-D33773;TCGA-A6-5664-D33774	c3a8627d-8872-491d-a670-a382c96334f2;e2446b99-586f-4a4a-bdac-86b3baa79ee1;3b3a45ac-d472-4def-ba9b-d3b9b9b128ed;2e02ab32-cfd5-4435-9bbb-d0d5cd74e318;24d21731-0c40-44e8-8a1b-f6317f78b0d2;dc3ca0c7-d4f6-4569-9e6a-3ab0421a3c62;cee020b0-05cb-4773-86d0-24f266a4c239;fb3b27ca-4360-4a50-ba63-27801b3a2451;7cad8852-e503-4c95-a4f7-ca6c11e54542;3BA99B8C-D023-41EB-BD42-E479F3EBDEDF;07B9A3D8-5A9A-42A5-9C94-C102D…	Not Available;Not Available;Not Available;Not Available;Not Available;Not Available;Not Available;Not Available;Not Available;Not Available;Not Available;Not Available;Not Available;Not Available	1;1;31;31;1;1;31;31;1;16;16;16;16;16	Not Available;Not Available;275;273;Not Available;Not Available;273;259;Not Available;635;391;635;635;637	301;301;231;231;301;301;231;231;301;301;301;301;301;301	Irinotecan;Leucovorin;Fluorouracil;Leucovorin;Bevacizumab;Fluorouracil;Oxaliplatin;Bevacizumab;Fluorouracil;Irinotecan;Bevacizumab;Leucovorin;Fluorouracil;Fluorouracil	Not Available;Not Available;Not Available;Not Available;Not Available;Not Available;Not Available;Not Available;Not Available;Clinical Progressive Disease;Clinical Progressive Disease;Clinical Progressive Disease;Clinical Progressive Disease;Clinical Progressive Disease	9;9;8;8;9;9;8;8;9;7;7;7;7;7	4;4;4;4;1;4;4;3;4;Not Available;Not Available;Not Available;Not Available;Not Available	320-331;50-150;4392-4416;50-100;339;736;150;334-343;4416;Not Available;Not Available;Not Available;Not Available;Not Available	mg;mg;mg;mg;mg;mg;mg;mg;mg;Not Available;Not Available;Not Available;Not Available;Not Available	PALLIATIVE;PALLIATIVE;PALLIATIVE;PALLIATIVE;PALLIATIVE;PALLIATIVE;PALLIATIVE;PALLIATIVE;PALLIATIVE;Not Available;Not Available;Not Available;Not Available;Not Available	Not Applicable;Not Applicable;Not Applicable;Not Applicable;Not Applicable;Not Applicable;Not Applicable;Not Applicable;Not Applicable;Not Applicable;Not Applicable;Not Applicable;Not Applicable;Not Applicable	2;2;1;1;2;2;1;1;2;Not Available;Not Available;Not Available;Not Available;Not Available	IV;IV;IV;IV;IV;IV;IV;IV;IV;Not Available;Not Available;Not Available;Not Available;Not Available	YES;YES;NO;NO;YES;YES;NO;NO;YES;NO;NO;NO;NO;NO	Chemotherapy;Other, specify in notes;Chemotherapy;Other, specify in notes;Targeted Molecular therapy;Chemotherapy;Chemotherapy;Targeted Molecular therapy;Chemotherapy;Chemotherapy;Targeted Molecular therapy;Ancillary;Chemotherapy;Chemotherapy	Not Available;Ancillary;Not Available;Ancillary;Not Available;Not Available;Not Available;Not Available;Not Available;Not Available;Not Available;Not Available;Not Available;Not Available	1313;400;17664;300;339;2944;600;1016;17664;Not Available;Not Available;Not Available;Not Available;Not Available	mg;mg;mg;mg;mg;mg;mg;mg;mg;Not Available;Not Available;Not Available;Not Available;Not Available	Not Available;Not Available;Not Available;Not Available;Not Available;Not Available;Not Available;Not Available;Not Available;NO;NO;NO;NO;NO	2011;2011;2011;2011;2011;2011;2011;2011;2011;2012;2012;2012;2012;2012	NOT HISPANIC OR LATINO	NA
TCGA-NH-A6GB	476	0	T3	N2b	MX	Stage IIIC	NA			71	Transverse Colon	TCGA-NH-A6GB	E3B0EE77-C419-4B2B-833F-90A221415489	NO	Not Available	25	NO	3	-26100	Not Applicable	0	170	Not Available	NA	TCGA-NH-A6GB-D47966;TCGA-NH-A6GB-D47967;TCGA-NH-A6GB-D66874;TCGA-NH-A6GB-D66875	203963D4-D536-4882-BA73-DCE96465215E;9E5F85B5-470E-4515-8A6D-AE85BC318C71;8642643C-31FB-43C3-A3F7-CBDA20E6E9D8;BEFB19FB-01C4-46FB-AA30-1EC5EAE2D187	Not Available;Not Available;Not Available;Not Available	3;3;24;24	212;212;576;576	49;49;49;49	oxaliplatin;Bevacizumab;leucovorin;fluorouracil	Clinical Progressive Disease;Clinical Progressive Disease;Clinical Progressive Disease;Clinical Progressive Disease	9;9;10;10	Not Available;Not Available;Not Available;Not Available	Not Available;Not Available;Not Available;Not Available	Not Available;Not Available;Not Available;Not Available	Not Available;Not Available;Not Available;Not Available	Not Applicable;Not Applicable;Not Applicable;Not Applicable	Not Available;Not Available;Not Available;Not Available	Not Available;Not Available;Not Available;Not Available	NO;NO;NO;NO	Chemotherapy;Immunotherapy;Ancillary;Chemotherapy	Not Available;Not Available;Not Available;Not Available	Not Available;Not Available;Not Available;Not Available	Not Available;Not Available;Not Available;Not Available	NO;NO;NO;NO	2013;2013;2014;2014	NOT HISPANIC OR LATINO	NA
TCGA-CM-6677	337	0	T3	N0	M0	Stage IIA	NA			75	Hepatic Flexure	TCGA-CM-6677	a85e8208-a6f5-4e91-8f35-ef574f4273fc	NO	Not Available	Not Available	YES	Not Available	-27575	Not Applicable	0	153	Not Available	NA																								NOT HISPANIC OR LATINO	NA
TCGA-D5-5539	596	0	T3	N1	M0	Stage IIIA	NA			60	Ascending Colon	TCGA-D5-5539	15d1b0fb-5c5f-4689-94f5-b33120a2bfae	NO	Not Available	Not Available	Not Available	22	-22097	Not Applicable	0	30	Not Available	NA	TCGA-D5-5539-D20730	cfa250cc-1c8d-4e9f-8385-fe6426cd2c8c	Not Available	19	195	38	5-FU	Not Available	1	9	Not Available	Not Available	ADJUVANT	Not Applicable	Not Available	IV	NO	Chemotherapy	Not Available	Not Available	Not Available	Not Available	2012	NOT HISPANIC OR LATINO	NA
TCGA-CK-5913	1561	0	T3	N0	MX	Stage IIA	NA			58	Cecum	TCGA-CK-5913	3758f4f7-ac2f-4f9d-bee2-526196f8129a	YES	Normal	2	NO	Not Available	-21399	Not Applicable	0	853	Not Available	NA																								NOT HISPANIC OR LATINO	NA
TCGA-CM-5349	915	0	T3	N0	M0	Stage IIA	NA			68	Cecum	TCGA-CM-5349	227f945f-76fd-4a63-9609-d4e730a3d22a	NO	Not Available	Not Available	NO	3	-24867	Not Applicable	0	335	Not Available	NA																								NOT HISPANIC OR LATINO	NA
TCGA-CM-6172	335	0	T3	N1a	M0	Stage IIIB	NA			70	Sigmoid Colon	TCGA-CM-6172	40c217ee-429f-41f4-adc6-db9186622b17	NO	Not Available	Not Available	NO	26	-25902	Not Applicable	0	212	Not Available	NA	TCGA-CM-6172-D15207;TCGA-CM-6172-D15210;TCGA-CM-6172-D15211	1c92cd0a-a3ad-417d-b9f2-5ee194656f03;4ab077b9-0d4a-4eba-91a6-afb6b7dea381;fede8ba2-c2c4-4f42-93f9-5599ab87d56d	Not Available;Not Available;Not Available	15;15;15	245;245;245	89;89;89	Leucovorin;Fluorouracil;Fluorouracil	Not Available;Not Available;Not Available	8;8;8	12;12;12	700;700;2100	mg;mg;mg	ADJUVANT;ADJUVANT;ADJUVANT	Not Applicable;Not Applicable;Not Applicable	1;1;1	IV;IV;IV	NO;NO;NO	Other, specify in notes;Chemotherapy;Chemotherapy	Ancillary agent;Not Available;Not Available	6890;7950;24000	mg;mg;mg	Not Available;Not Available;Not Available	2011;2011;2011	NOT HISPANIC OR LATINO	NA
TCGA-D5-6920	377	0	T3	N0	M0	Stage IIA	NA			77	Sigmoid Colon	TCGA-D5-6920	dc22eba5-6fb7-4875-b30a-99fa00758301	NO	Not Available	Not Available	NO	18	-28124	Not Applicable	0	112	Not Available	NA																								NOT HISPANIC OR LATINO	NA
TCGA-AZ-6606	357	1	T4	N2	M1	Stage IV	NA			81	Cecum	TCGA-AZ-6606	c8d6fe73-3504-42a5-9723-e1916fba8208	Not Available	Not Available	Not Available	Not Available	2	-29704	357	0	Not Available	Not Available	NA	TCGA-AZ-6606-D34173;TCGA-AZ-6606-D34174	911D9E4B-F7D6-4148-8474-7711805F5561;410BCD90-40D4-47F1-82A9-917465D28CD4	Not Available;Not Available	1;1	103;165	59;165	Folfiri;5 FU	Clinical Progressive Disease;Clinical Progressive Disease	8;8	Not Available;Not Available	Not Available;Not Available	Not Available;Not Available	Not Available;Not Available	Not Applicable;Not Applicable	Not Available;Not Available	Not Available;Not Available	NO;NO	Chemotherapy;Chemotherapy	Not Available;Not Available	Not Available;Not Available	Not Available;Not Available	NO;NO	2012;2012	NOT HISPANIC OR LATINO	NA
TCGA-CM-6163	427	0	T1	N0	M0	Stage I	NA			74	Sigmoid Colon	TCGA-CM-6163	8c043ecd-2265-411f-bc3b-dc341cf56ac2	NO	Not Available	Not Available	YES	19	-27150	Not Applicable	0	90	Not Available	NA																								NOT HISPANIC OR LATINO	NA
TCGA-AZ-4323	43	1	T4	N2	M1	Stage IV	NA			37	Cecum	TCGA-AZ-4323	c59d90a6-9cda-426d-b8ea-41f0a87033d5	Not Available	Not Available	Not Available	Not Available	31	-13755	43	0	Not Available	Not Available	NA	TCGA-AZ-4323-D30624	d2b47817-125a-48ac-85c5-bda942ea8cb8	Not Available	13	Not Available	27	Oxaliplatin	Unknown	4	Not Available	Not Available	Not Available	Not Available	Not Applicable	Not Available	Not Available	NO	Chemotherapy	Not Available	Not Available	Not Available	NO	2012	NOT HISPANIC OR LATINO	NA
TCGA-AZ-6598	1503	1	T3	N0	MX	Stage II	NA			77	Discrepancy	TCGA-AZ-6598	a8b4284d-cbbb-43e3-897b-d04af4bfba74	Not Available	Not Available	Not Available	Not Available	29	-28182	1503	0	Not Available	Not Available	NA																								NOT HISPANIC OR LATINO	NA
TCGA-A6-5662	718	0	T3	N2	M1	Stage IVA	NA			46	Splenic Flexure	TCGA-A6-5662	960d278c-c87d-42dc-ad28-42e010d8f0f1	NO	Not Available	Not Available	NO	2	-16873	Not Applicable	0	297	Not Available	NA	TCGA-A6-5662-D18214;TCGA-A6-5662-D18219;TCGA-A6-5662-D18215;TCGA-A6-5662-D18217;TCGA-A6-5662-D18220;TCGA-A6-5662-D18218	bb925bf4-00b9-42dd-93aa-ee0576cc19ef;4ac04901-5785-41aa-9367-81ac00bfa8be;1caf1e4f-8aaa-43dc-9348-55b58fd5729e;ae0bab42-dcdf-4839-8310-26e7971cb270;00bf24a2-d995-4f9e-8c7f-8603f0c9c582;33f69924-19e0-446d-8b33-b9e5d327e610	Not Available;Not Available;Not Available;Not Available;Not Available;Not Available	8;8;8;8;8;8	368;395;395;395;487;397	60;60;60;60;426;60	Oxaliplatin;Bevacizumab;Fluorouracil;Leucovorin;Xeloda;Fluorouracil	Not Available;Not Available;Not Available;Not Available;Not Available;Not Available	11;11;11;11;11;11	12;23;23;23;3;23	143-171;389-436;487-804;50-100;3500- 4000;2923-4824	mg;mg;mg;mg;mg;mg	OTHER, SPECIFY IN NOTES;OTHER, SPECIFY IN NOTES;OTHER, SPECIFY IN NOTES;OTHER, SPECIFY IN NOTES;OTHER, SPECIFY IN NOTES;OTHER, SPECIFY IN NOTES	Metastatic;Metastatic;Metastatic;Metastatic;Metastatic;Metastatic	1;1;1;1;2;1	IV;IV;IV;IV;PO;IV	NO;NO;NO;NO;NO;NO	Chemotherapy;Targeted Molecular therapy;Chemotherapy;Other, specify in notes;Chemotherapy;Chemotherapy	Not Available;Not Available;Not Available;Ancillary;Not Available;Not Available	1977;9488;17194;1450;Not Available;101,059	mg;mg;mg;mg;mg;mg	Not Available;Not Available;Not Available;Not Available;Not Available;Not Available	2011;2011;2011;2011;2011;2011	NOT HISPANIC OR LATINO	NA
TCGA-DM-A0X9	3641	0	T3	N0	M0	Stage IIA	NA			71	Discrepancy	TCGA-DM-A0X9	75ea63a9-357b-4566-bd78-eaa67809decd	YES	Normal	Not Available	YES	10	-26217	Not Applicable	0	3429	Not Available	NA																								NOT HISPANIC OR LATINO	NA
TCGA-AA-3510	1946	0	T3	N0	M0	Stage II	NA			70	Transverse Colon	TCGA-AA-3510	35c295c2-37d1-44b2-87a3-1039645e5bae	NO	Not Available	Not Available	Not Available	18	-25902	Not Applicable	0	31	Not Available	NA																								Not Available	NA
TCGA-AZ-4308	3324	0	T3	N1	M0	Stage IIIB	NA			47	Sigmoid Colon	TCGA-AZ-4308	3d8fd9b2-9aa2-4c81-8843-535ae66d6140	Not Available	Not Available	1	Not Available	11	-17321	Not Applicable	0	1715	Not Available	NA	TCGA-AZ-4308-D20205;TCGA-AZ-4308-D31198;TCGA-AZ-4308-D72532	309da8a6-9b7a-4a25-b3cf-72f765484963;fb00dbc1-fe8e-499f-a828-6f339a1095ba;2D0F4E33-22EC-4990-80E0-158C353540BB	Not Available;Not Available;Not Available	6;25;11	196;191;196	53;50;53	Folinic acid;Avastin;Leucovorin	Not Available;Complete Response;Complete Response	1;4;7	6;Not Available;Not Available	Not Available;Not Available;Not Available	Not Available;Not Available;Not Available	ADJUVANT;Not Available;Not Available	Not Applicable;Not Applicable;Not Applicable	Not Available;Not Available;Not Available	IV;Not Available;Not Available	NO;NO;NO	Chemotherapy;Chemotherapy;Chemotherapy	Not Available;Not Available;Not Available	Not Available;Not Available;Not Available	Not Available;Not Available;Not Available	Not Available;NO;NO	2012;2012;2015	NOT HISPANIC OR LATINO	NA
TCGA-CK-5914	669	0	T3	N1	MX	Stage IIIB	NA			81	Sigmoid Colon	TCGA-CK-5914	57b0f89f-1b75-453e-922c-01cd4d44ca49	NO	Not Available	25	NO	Not Available	-29586	Not Applicable	0	669	Not Available	NA																								NOT HISPANIC OR LATINO	NA
TCGA-AA-3506	1765	0	T2	N0	M0	Stage I	NA			77	Hepatic Flexure	TCGA-AA-3506	28033279-cc74-4775-afdf-2497f6ddb55c	NO	Not Available	Not Available	Not Available	18	-28275	Not Applicable	0	0	Not Available	NA																								Not Available	NA
TCGA-CA-5255	376	0	T3	N0	M0	Stage IIA	NA			45	Ascending Colon	TCGA-CA-5255	563d67a1-f1ba-4722-aa2d-9b35b1689468	Not Available	Not Available	Not Available	Not Available	8	-16743	Not Applicable	0	2	Not Available	NA	TCGA-CA-5255-D70893;TCGA-CA-5255-D70894;TCGA-CA-5255-D70896	5BCC76C0-2AA1-4924-ABBC-BFEED0763489;E910330C-3E93-4D6E-9D24-CF762F6FEA96;F33C7ED2-B534-4BF8-9791-20E4CFC321B2	Not Available;Not Available;Not Available	10;10;10	331;331;331	164;164;164	oxaliplatin;5-Fluorouracil;Folinic Acid	Complete Response;Complete Response;Complete Response	3;3;3	Not Available;Not Available;Not Available	Not Available;Not Available;Not Available	Not Available;Not Available;Not Available	Not Available;Not Available;Not Available	Not Applicable;Not Applicable;Not Applicable	Not Available;Not Available;Not Available	Not Available;Not Available;Not Available	NO;NO;NO	Chemotherapy;Chemotherapy;Chemotherapy	Not Available;Not Available;Not Available	Not Available;Not Available;Not Available	Not Available;Not Available;Not Available	NO;NO;NO	2015;2015;2015	NOT HISPANIC OR LATINO	NA
TCGA-AD-6964	331	1	T4a	N2b			NA			58	Cecum	TCGA-AD-6964	5e7074a6-5011-4dc5-950c-41365dbc6d09	YES	Normal	0	NO	17	-21457	Not Applicable	0	23	Not Available	NA	TCGA-AD-6964-D47096	80AE8305-E49C-40BD-A961-158C125E4D50	Not Available	22	214	63	Folfox	Clinical Progressive Disease	8	Not Available	Not Available	Not Available	Not Available	Not Applicable	Not Available	Not Available	NO	Chemotherapy	Not Available	Not Available	Not Available	NO	2013	NOT HISPANIC OR LATINO	NA
TCGA-CM-5864	457	0	T2	N0	M0	Stage I	NA			60	Cecum	TCGA-CM-5864	5b259d18-3976-4f44-967f-fe5fa8447c8b	NO	Not Available	Not Available	NO	18	-22219	Not Applicable	0	61	Not Available	NA																								NOT HISPANIC OR LATINO	NA
TCGA-G4-6320	804	0	T3	N1	MX	Stage III	NA			73	Hepatic Flexure	TCGA-G4-6320	da21e143-dbf6-4ac7-8872-f1d9ae39512d	NO	Not Available	Not Available	YES	11	-26840	Not Applicable	0	678	Not Available	NA	TCGA-G4-6320-D21911;TCGA-G4-6320-D21914;TCGA-G4-6320-D21913	cc241491-1bbe-4a4e-bce5-52b8b63d0f39;2b3677bc-4ef6-4226-ac39-22c5a2c4e2cd;536049c4-8854-4618-8702-adba0c21b59c	Not Available;Not Available;Not Available	30;30;30	145;209;209	41;41;41	Oxaliplatin;Leucovorin;Fluorouracil	Not Available;Not Available;Not Available	1;1;1	8;12;12	227;1068;400	mg;mg;mg/m2	ADJUVANT;ADJUVANT;ADJUVANT	Not Applicable;Not Applicable;Not Applicable	1;1;1	IV;IV;IV	NO;NO;NO	Chemotherapy;Chemotherapy;Chemotherapy	Not Available;Not Available;Not Available	1600;12816;4800	mg;mg;mg/m2	Not Available;Not Available;Not Available	2012;2012;2012	NOT HISPANIC OR LATINO	NA
TCGA-AD-6890	746	0	T1	N0	MX		NA			65	Ascending Colon	TCGA-AD-6890	e8e80df9-e3ba-4dec-b8fc-a5e80d8c6798	NO	Not Available	10	YES	22	-23769	Not Applicable	0	24	Not Available	NA																								Not Available	NA
TCGA-G4-6317	1095	0	T3	N2	MX	Stage IIIC	NA			51	Sigmoid Colon	TCGA-G4-6317	cee553c8-460d-436b-b55d-8f41624816cc	NO	Not Available	Not Available	NO	12	-18822	Not Applicable	0	894	Not Available	NA	TCGA-G4-6317-D21906;TCGA-G4-6317-D21909;TCGA-G4-6317-D21907	4000a702-021c-48f2-bfa2-e3c52473cf59;f832e4e9-adbc-47e3-8ded-4aa8a47b947b;8a1ce59a-d27d-4bf6-b512-3c41d7ee9704	Not Available;Not Available;Not Available	30;30;30	201;201;201	47;47;47	Fluorouracil;Leucovorin;Oxaliplatin	Not Available;Not Available;Not Available	1;1;1	12;12;11	800;800;170	mg;mg;mg	ADJUVANT;ADJUVANT;ADJUVANT	Not Applicable;Not Applicable;Not Applicable	1;1;1	IV;IV;IV	NO;NO;NO	Chemotherapy;Other, specify in notes;Chemotherapy	Not Available;Ancillary;Not Available	9664;9600;1882	mg;mg;mg	Not Available;Not Available;Not Available	2012;2012;2012	NOT HISPANIC OR LATINO	NA
TCGA-D5-7000	312	0	T2	N0	M0	Stage I	NA			79	Cecum	TCGA-D5-7000	d5a296ae-c165-413c-adcc-33c9e99ff873	NO	Not Available	30	NO	18	-28913	Not Applicable	0	41	Not Available	NA																								NOT HISPANIC OR LATINO	NA
TCGA-CM-4744	609	0	T2	N0	M0	Stage I	NA			69	Cecum	TCGA-CM-4744	cc15469c-7bad-4e86-9da3-ae0c72e9d380	NO	Not Available	Not Available	YES	24	-25506	Not Applicable	0	214	Not Available	NA																								NOT HISPANIC OR LATINO	NA
TCGA-F4-6704	47	0	T3	N2b	MX	Stage IIIC	NA			60	Sigmoid Colon	TCGA-F4-6704	c6ed47f4-358b-4f06-b5cd-cdf1d5c47b43	NO	Not Available	Not Available	NO	25	-21949	Not Applicable	0	47	Not Available	NA																								NOT HISPANIC OR LATINO	NA
TCGA-DM-A1DB	1348	1	T3	N0	M0	Stage IIA	NA			68	Sigmoid Colon	TCGA-DM-A1DB	d71ae66e-2c8a-4fd8-8b4b-a5a2d456a21d	YES	Normal	Not Available	Not Available	Not Available	-24888	1348	0	1348	1348	NA																								NOT HISPANIC OR LATINO	NA
TCGA-NH-A6GC	389	0	T4b	N1b	M1b	Stage IVB	NA			66	Descending Colon	TCGA-NH-A6GC	0687BEA4-911A-4EF2-9FA2-531EF6BA7910	NO	Not Available	1	NO	3	-24355	Not Applicable	0	40	Not Available	NA	TCGA-NH-A6GC-D60511;TCGA-NH-A6GC-D60512;TCGA-NH-A6GC-D60513	38D95D8B-82F3-487D-9992-7A0D08960E60;0FD6191F-0FF6-4426-8563-73D20C9BD713;072FE925-4152-4D53-82CE-09E9B5CC0652	Not Available;Not Available;Not Available	10;10;10	Not Available;Not Available;Not Available	186;186;186	fluorouracil;oxaliplatin;bevacizumab	Not Applicable;Not Applicable;Not Applicable	6;6;6	Not Available;Not Available;Not Available	Not Available;Not Available;Not Available	Not Available;Not Available;Not Available	Not Available;Not Available;Not Available	Not Applicable;Not Applicable;Not Applicable	Not Available;Not Available;Not Available	Not Available;Not Available;Not Available	YES;YES;YES	Chemotherapy;Chemotherapy;Immunotherapy	Not Available;Not Available;Not Available	Not Available;Not Available;Not Available	Not Available;Not Available;Not Available	NO;NO;NO	2014;2014;2014	NOT HISPANIC OR LATINO	NA
TCGA-CK-4952	475	0	T4	N2	M0	Stage IIIC	NA			48	Ascending Colon	TCGA-CK-4952	5342e2e8-1465-4f7b-9450-ef27280f80c7	NO	Not Available	21	NO	31	-17826	Not Applicable	0	475	Not Available	NA																								NOT HISPANIC OR LATINO	NA
TCGA-G4-6297	2506	0	T3	N2	M1	Stage IV	NA			55	Cecum	TCGA-G4-6297	622cc1c4-d721-4b5c-a88b-216d6368660b	NO	Not Available	Not Available	YES	30	-20103	Not Applicable	0	2289	Not Available	NA	TCGA-G4-6297-D22073;TCGA-G4-6297-D22080;TCGA-G4-6297-D22087;TCGA-G4-6297-D22074;TCGA-G4-6297-D22096;TCGA-G4-6297-D22071;TCGA-G4-6297-D22093;TCGA-G4-6297-D22076;TCGA-G4-6297-D22089;TCGA-G4-6297-D22079;TCGA-G4-6297-D22084;TCGA-G4-6297-D22086;TCGA-G4-6297-D22082;TCGA-G4-6297-D22097;TCGA-G4-6297-D22068	26aae8b9-b217-4ae4-84d2-20eb58eaa2b2;f0c7c99e-319d-4edb-b480-dd3e75e87b4e;25C9F9E7-35F7-4297-95CE-B9DAD4C1947F;6ab9bc08-f684-4502-8451-741d5a9dbff9;FEAAEA2D-1E20-4535-A045-B8681E6342A9;8425101a-756c-410d-81a8-2076b80de3bb;99251907-ED41-4F3E-B4C8-B927812A6053;991cc478-d3ed-4616-beae-0cc297dd9613;D9C655DD-4834-48B8-92CE-1F9B3F354760;c9ab9ffe-f904-4dfa-914c-0e8d4b3ed184;f7189321-dcef-43c0-9505-44974…	Not Available;Not Available;Not Available;Not Available;Not Available;Not Available;Not Available;Not Available;Not Available;Not Available;Not Available;Not Available;Not Available;Not Available;Not Available	19;19;19;19;19;19;19;19;19;19;19;19;19;19;19	103;1181;Not Available;103;Not Available;103;2373;726;1636;719;1181;1181;1076;2450;103	33;1041;1377;33;2450;33;1687;565;1377;565;1041;1041;1041;2450;33	Fluorouracil;Bevacizumab;Bevacizumab;Leucovorin;Oxaliplatin;Oxaliplatin;Irinotecan;Cetuximab;Xeloda;Irinotecan;Fluorouracil;Leucovorin;Oxaliplatin;Fluorouracil;Avastin	Not Available;Not Available;Not Available;Not Available;Not Available;Not Available;Not Available;Not Available;Not Available;Not Available;Not Available;Not Available;Not Available;Not Available;Not Available	1;1;1;1;1;1;1;1;1;1;1;1;1;1;1	Not Available;10;61;Not Available;4;Not Available;45;23;13;12;10;10;3;1;Not Available	400;445;712;400;168;85;300;760;3600;342;800;800;170;792;5	mg/m2;mg;mg;mg/m2;mg;mg/m2;mg;mg;mg/day;mg;mg;mg;mg;mg;mg/kg	ADJUVANT;RECURRENCE;PROGRESSION;ADJUVANT;PROGRESSION;ADJUVANT;PROGRESSION;PROGRESSION;PROGRESSION;PROGRESSION;PROGRESSION;RECURRENCE;PROGRESSION;PROGRESSION;ADJUVANT	Not Applicable;Not Applicable;Not Applicable;Not Applicable;Not Applicable;Not Applicable;Not Applicable;Not Applicable;Not Applicable;Not Applicable;Not Applicable;Not Applicable;Not Applicable;Not Applicable;Not Applicable	1;3;4;1;6;1;5;2;4;2;3;3;3;6;1	IV;IV;IV;IV;IV;IV;IV;IV;PO;IV;IV;IV;IV;IV;IV	NO;NO;YES;NO;YES;NO;NO;NO;NO;NO;NO;NO;NO;NO;NO	Chemotherapy;Chemotherapy;Chemotherapy;Chemotherapy;Chemotherapy;Chemotherapy;Chemotherapy;Chemotherapy;Chemotherapy;Chemotherapy;Chemotherapy;Chemotherapy;Chemotherapy;Chemotherapy;Chemotherapy	Not Available;Not Available;Not Available;Not Available;Not Available;Not Available;Not Available;Not Available;Not Available;Not Available;Not Available;Not Available;Not Available;Not Available;Not Available	Not Available;4310;30661;Not Available;630;Not Available;13386;11210;655200;4104;7900;7900;510;792;Not Available	Not Available;mg;mg;Not Available;mg;Not Available;mg;mg;mg;mg;mg;mg;mg;mg;Not Available	Not Available;Not Available;Not Available;Not Available;Not Available;Not Available;Not Available;Not Available;Not Available;Not Available;Not Available;Not Available;Not Available;Not Available;Not Available	2012;2012;2012;2012;2012;2012;2012;2012;2012;2012;2012;2012;2012;2012;2012	NOT HISPANIC OR LATINO	NA
TCGA-G4-6302	0	0	T3	N0	M0	Stage IIA	NA			90	Cecum	TCGA-G4-6302	7144a65f-a63f-4b79-8fe2-cfe48696de03	NO	Not Available	1	YES	5	-32872	Not Applicable	0	0	Not Available	NA																								NOT HISPANIC OR LATINO	NA
TCGA-CM-4750	244	0	T1	N1b	M0	Stage IIIA	NA			34	Not Available	TCGA-CM-4750	c777a777-373a-4773-9566-6c373261f00a	NO	Not Available	4	YES	24	-12478	Not Applicable	0	244	Not Available	NA	TCGA-CM-4750-D9917;TCGA-CM-4750-D9914;TCGA-CM-4750-D9915;TCGA-CM-4750-D9916	f1f12f68-b591-4801-b1a8-66c57856433c;52a49370-98c2-41f8-a0bf-4f67af1d0fae;0d015d60-0914-4165-8746-4ed9f2f0a395;0d47bdc8-bec1-4090-b4be-f7bfe1c3ea6a	Not Available;Not Available;Not Available;Not Available	17;17;17;17	210;168;210;210	49;49;49;49	Fluorouracil;Oxaliplatin;Leucovorin;Fluorouracil	Not Available;Not Available;Not Available;Not Available	1;1;1;1	11;9;12;12	2300-4650;80-165;40-770;400-750	mg;mg;mg;mg	ADJUVANT;ADJUVANT;ADJUVANT;ADJUVANT	Not Applicable;Not Applicable;Not Applicable;Not Applicable	1;1;1;1	IV;IV;IV;Intravesical	NO;NO;NO;NO	Chemotherapy;Chemotherapy;Other, specify in notes;Chemotherapy	Not Available;Not Available;Ancillary;Not Available	41450;1075;5690;6950	mg;mg;mg/day;mg	Not Available;Not Available;Not Available;Not Available	2011;2011;2011;2011	NOT HISPANIC OR LATINO	NA
TCGA-CK-5916	643	1	T1	N0	M0	Stage I	NA			71	Cecum	TCGA-CK-5916	38d65618-4857-490e-86b3-0a3f772a9f60	NO	Not Available	Not Available	NO	Not Available	-26024	643	0	Not Available	Not Available	NA																								NOT HISPANIC OR LATINO	NA
TCGA-CM-6168	395	0	T3	N0	M0	Stage IIA	NA			84	Ascending Colon	TCGA-CM-6168	75c3004d-1ef4-49f9-86e0-1bb7b9553a3d	NO	Not Available	Not Available	NO	19	-30834	Not Applicable	0	181	Not Available	NA																								NOT HISPANIC OR LATINO	NA
TCGA-AZ-6603	899	1	T2	N1	MX		NA			77	Sigmoid Colon	TCGA-AZ-6603	56d5b0b9-9093-4286-a2c6-7faa9a1680f5	Not Available	Not Available	Not Available	Not Available	2	-28424	899	0	Not Available	Not Available	NA																								NOT HISPANIC OR LATINO	NA
TCGA-D5-6922	308	0	T3	N1	M0	Stage IIIA	NA			76	Sigmoid Colon	TCGA-D5-6922	0a94eecf-4db2-4846-8383-c83ff02e4a9f	NO	Not Available	Not Available	NO	18	-27771	Not Applicable	0	134	Not Available	NA																								NOT HISPANIC OR LATINO	NA
TCGA-AD-6548	650	0	T2	N0	M0	Stage I	NA			81	Splenic Flexure	TCGA-AD-6548	c113808a-773f-4179-82d6-9083518404b5	Not Available	Not Available	4	YES	22	-29758	Not Applicable	0	3	Not Available	NA																								NOT HISPANIC OR LATINO	NA
TCGA-CM-5341	884	0	T2	N1a	M0	Stage IIIA	NA			82	Sigmoid Colon	TCGA-CM-5341	2d3ce817-b269-4662-a92d-392bd3662399	NO	Not Available	Not Available	NO	10	-30163	Not Applicable	0	183	Not Available	NA	TCGA-CM-5341-D5927;TCGA-CM-5341-D16156;TCGA-CM-5341-D16157	a7fd2c6d-39f7-4b7a-a2a0-1c7922e5fb77;929311bf-d001-4c25-8554-b7e6d5bb7f98;516885c2-a0e5-4bd5-ad56-d9d59a1c9a8a	Not Available;Not Available;Not Available	10;14;14	273;273;273	122;122;122	fluorouracil;fluorouracil;Leucovorin Calcium	Not Available;Not Available;Not Available	1;9;9	11;11;11	600;1700;600	mg;mg;mg	ADJUVANT;ADJUVANT;ADJUVANT	Not Applicable;Not Applicable;Not Applicable	1;1;1	IV;IV;IV	NO;NO;NO	Chemotherapy;Chemotherapy;Other, specify in notes	Not Available;Not Available;Ancillary	5900;16600;4580	mg;mg;mg	Not Available;Not Available;Not Available	2011;2011;2011	NOT HISPANIC OR LATINO	NA
TCGA-CK-5915	0	0	T2	N0	MX	Stage I	NA			63	Sigmoid Colon	TCGA-CK-5915	c658f35d-ceeb-4189-8e3d-03e3b9706667	NO	Not Available	Not Available	YES	Not Available	-23040	Not Applicable	0	0	Not Available	NA																								NOT HISPANIC OR LATINO	NA
TCGA-AA-3489	214	1	T3	N0	M0	Stage II	NA			75	Sigmoid Colon	TCGA-AA-3489	b95720b1-aa00-4c6a-b202-3350d035829f	NO	Not Available	Not Available	Not Available	18	-27606	Not Applicable	0	31	Not Available	NA																								Not Available	NA
TCGA-A6-2680	1068	0	T3	N0	M0	Stage II	NA			72	Hepatic Flexure	TCGA-A6-2680	ff1407c6-9174-4bae-a19b-d34ca71b898c	NO	Not Available	Not Available	NO	19	-26533	Not Applicable	0	522	Not Available	NA																								NOT HISPANIC OR LATINO	NA
TCGA-CM-4746	1126	0	T2	N0	M0	Stage I	NA			61	Sigmoid Colon	TCGA-CM-4746	c0b8c55c-b993-481d-aeea-9ebfa64ee20e	NO	Not Available	Not Available	YES	10	-22403	Not Applicable	0	699	Not Available	NA																								NOT HISPANIC OR LATINO	NA
TCGA-CM-5344	670	0	T3	N1b	M0	Stage IIIB	NA			39	Sigmoid Colon	TCGA-CM-5344	b6202d8d-dd3c-4fa2-9242-6e55759846af	NO	Not Available	Not Available	YES	3	-14426	Not Applicable	0	304	Not Available	NA	TCGA-CM-5344-D15264;TCGA-CM-5344-D15259;TCGA-CM-5344-D15262;TCGA-CM-5344-D15261;TCGA-CM-5344-D15260;TCGA-CM-5344-D15263	a3bae552-da95-42e8-b17c-c73532e66b4d;06418df1-95ee-4f7e-ac89-3b3af2d0490a;d4db4d65-33e4-4814-99eb-8354ca36eeca;82888328-8e75-4806-a3b5-fa5170d5a665;983af547-6cba-4e7d-a1c7-2ca7836f519c;c73bd755-af7e-413c-8d7d-ccd715806859	Not Available;Not Available;Not Available;Not Available;Not Available;Not Available	15;15;15;15;15;15	217;215;229;229;229;81	91;68;68;68;68;81	Pegfilgrastim (Peg G-CSF);Oxaliplatin;Fluorouracil;Fluorouracil;Leucovorin;Filgrastim (G-CSF)	Not Available;Not Available;Not Available;Not Available;Not Available;Not Available	8;8;8;8;8;8	10;11;12;12;12;1	6;140;2000;650;650;300	mg;mg;mg;mg;mg;ug	ADJUVANT;ADJUVANT;ADJUVANT;ADJUVANT;ADJUVANT;ADJUVANT	Not Applicable;Not Applicable;Not Applicable;Not Applicable;Not Applicable;Not Applicable	1;1;1;1;1;1	SC;IV;IV;IV;IV;SC	NO;NO;NO;NO;NO;NO	Other, specify in notes;Chemotherapy;Chemotherapy;Chemotherapy;Other, specify in notes;Other, specify in notes	Ancillary agent;Not Available;Not Available;Not Available;Ancillary agent;Ancillary agent	60;1540;23900;7800;6340;300	mg;mg;mg;mg;mg;ug	Not Available;Not Available;Not Available;Not Available;Not Available;Not Available	2011;2011;2011;2011;2011;2011	HISPANIC OR LATINO	NA
TCGA-G4-6321	672	0	T2	N1	MX	Stage III	NA			60	Cecum	TCGA-G4-6321	e7dbfca1-9657-4952-8e0d-dec6373dda5b	NO	Not Available	110	YES	13	-21921	Not Applicable	0	572	Not Available	NA	TCGA-G4-6321-D21918;TCGA-G4-6321-D21919;TCGA-G4-6321-D21917	939cf32b-c067-4fe7-b0d4-5ab549c56393;cdfb2842-633d-48b2-8a2b-47d9c6ffa86e;2de2d207-7fac-4c6a-b0b3-57c575eff4f3	Not Available;Not Available;Not Available	30;30;22	257;257;243	103;103;103	Fluorouracil;Leucovorin;Oxaliplatin	Not Available;Not Available;Not Available	1;1;2	12;12;11	824;824;175	mg;mg;mg	ADJUVANT;ADJUVANT;ADJUVANT	Not Applicable;Not Applicable;Not Applicable	1;1;1	IV;IV;IV	NO;NO;NO	Chemotherapy;Chemotherapy;Chemotherapy	Not Available;Not Available;Not Available	9680;9680;1890	mg;mg;mg	Not Available;Not Available;Not Available	2012;2012;2012	NOT HISPANIC OR LATINO	NA
TCGA-A6-6650	627	0	T3	N0	M0	Stage IIA	NA	FPPP	TCGA	69	Discrepancy	TCGA-A6-6650	6cd8d2dd-5545-43b0-b796-ae0506d62eb8	NO	Not Available	Not Available	NO	20	-25516	Not Applicable	0	173	Not Available	NA																								NOT HISPANIC OR LATINO	NA
TCGA-G4-6303	2003	1	T3	N1	M1	Stage IV	NA			54	Sigmoid Colon	TCGA-G4-6303	264c0d45-078a-4207-a101-71f99bcd237e	NO	Not Available	Not Available	YES	1	-19800	Not Applicable	0	1882	Not Available	NA	TCGA-G4-6303-D21602;TCGA-G4-6303-D21722;TCGA-G4-6303-D21793;TCGA-G4-6303-D21603;TCGA-G4-6303-D21789;TCGA-G4-6303-D21600;TCGA-G4-6303-D21604;TCGA-G4-6303-D21727;TCGA-G4-6303-D21794;TCGA-G4-6303-D21605;TCGA-G4-6303-D21717;TCGA-G4-6303-D21790;TCGA-G4-6303-D21725;TCGA-G4-6303-D21720;TCGA-G4-6303-D21601	d5338126-8849-4359-bd0e-9639362668d3;8513635f-8463-49de-83f2-6c54d479b728;57D9E884-76A1-4676-9427-18237D676857;57970f69-f63f-427e-bf68-86d90b0f5ac8;c92c9a04-8347-4909-960b-0f4878f27b08;30f4a7a0-2e8d-4001-b5ff-cc4797c7fd66;469d1453-719a-4bec-bf80-abd497cca359;d26c7bb7-87f7-4960-9ed4-8ef58ac71e95;5CEB94A7-D009-4796-A6B3-E5D560CC9B81;7a35095d-25fa-4780-95aa-88c2c4032d95;34bd5fb4-ebfa-4d5b-9ae9-96be7…	Not Available;Not Available;Not Available;Not Available;Not Available;Not Available;Not Available;Not Available;Not Available;Not Available;Not Available;Not Available;Not Available;Not Available;Not Available	23;23;23;23;23;23;23;23;23;23;23;23;23;23;23	682;1596;1994;1443;1994;682;1443;1838;1994;1443;1596;1994;1838;1596;682	516;1443;1840;896;1840;516;896;1596;1840;896;1443;1840;1596;1443;516	5-FU;5-FU;Leucovorin;Avastin;Oxaliplatin;Leucovorin;Leucovorin;Irinotecan;5-FU;5-FU;Leucovorin;Bevacizumab;Erbitux;Irinotecan;Oxaliplatin	Not Available;Not Available;Not Available;Not Available;Not Available;Not Available;Not Available;Not Available;Not Available;Not Available;Not Available;Not Available;Not Available;Not Available;Not Available	1;1;1;1;1;1;1;1;1;1;1;1;1;1;1	6;Not Available;10;Not Available;10;6;Not Available;12;10;Not Available;Not Available;10;12;Not Available;6	660;Not Available;680;Not Available;145;660;Not Available;Not Available;Not Available;Not Available;Not Available;325;Not Available;Not Available;165	mg;Not Available;mg;Not Available;mg;mg;Not Available;Not Available;Not Available;Not Available;Not Available;mg;Not Available;Not Available;mg	PROGRESSION;PROGRESSION;PROGRESSION;PROGRESSION;PROGRESSION;PROGRESSION;PROGRESSION;PROGRESSION;PROGRESSION;PROGRESSION;PROGRESSION;PROGRESSION;PROGRESSION;PROGRESSION;PROGRESSION	Not Applicable;Not Applicable;Not Applicable;Not Applicable;Not Applicable;Not Applicable;Not Applicable;Not Applicable;Not Applicable;Not Applicable;Not Applicable;Not Applicable;Not Applicable;Not Applicable;Not Applicable	1;3;5;2;5;1;2;4;5;2;3;5;4;3;1	IV;Not Available;IV;Not Available;IV;IV;Not Available;Not Available;IV;Not Available;Not Available;IV;Not Available;Not Available;IV	NO;NO;NO;NO;NO;NO;NO;NO;NO;NO;NO;NO;NO;NO;NO	Chemotherapy;Chemotherapy;Chemotherapy;Chemotherapy;Chemotherapy;Chemotherapy;Chemotherapy;Chemotherapy;Chemotherapy;Chemotherapy;Chemotherapy;Chemotherapy;Chemotherapy;Chemotherapy;Chemotherapy	Not Available;Not Available;Not Available;Not Available;Not Available;Not Available;Not Available;Not Available;Not Available;Not Available;Not Available;Not Available;Not Available;Not Available;Not Available	3960;Not Available;6790;Not Available;1450;3960;Not Available;Not Available;Not Available;Not Available;Not Available;3240;Not Available;Not Available;990	mg;Not Available;mg;Not Available;mg;mg;Not Available;Not Available;Not Available;Not Available;Not Available;mg;Not Available;Not Available;mg	Not Available;Not Available;Not Available;Not Available;Not Available;Not Available;Not Available;Not Available;Not Available;Not Available;Not Available;Not Available;Not Available;Not Available;Not Available	2012;2012;2012;2012;2012;2012;2012;2012;2012;2012;2012;2012;2012;2012;2012	NOT HISPANIC OR LATINO	NA
TCGA-F4-6854	16	0	T3	N0	M0	Stage IIA	NA			77	Sigmoid Colon	TCGA-F4-6854	01240896-3f3f-4bf9-9799-55c87bfacf36	NO	Not Available	Not Available	NO	7	-28272	Not Applicable	0	16	Not Available	NA																								NOT HISPANIC OR LATINO	NA
TCGA-A6-2675	1321	0	T3	N0	MX	Stage IIA	NA			78	Sigmoid Colon	TCGA-A6-2675	07dc5a1d-64b7-42ba-928e-9753bd533c1e	NO	Not Available	Not Available	NO	30	-28813	Not Applicable	0	515	Not Available	NA																								NOT HISPANIC OR LATINO	NA
TCGA-CM-6171	427	0	T2	N0	M0	Stage I	NA			77	Ascending Colon	TCGA-CM-6171	eed7405f-f8f3-41a4-a0e7-242f23087f59	NO	Not Available	Not Available	NO	19	-28307	Not Applicable	0	182	Not Available	NA																								NOT HISPANIC OR LATINO	NA
TCGA-F4-6570	188	1	T3	N0	M0	Stage IIA	NA			78	Transverse Colon	TCGA-F4-6570	eeb42912-0c7a-46bb-bd95-369b2b425727	NO	Not Available	Not Available	Not Available	20	-28772	Not Applicable	0	0	Not Available	NA																								NOT HISPANIC OR LATINO	NA
TCGA-AZ-6607	97	1	T4	N2	M1	Stage IV	NA			69	Sigmoid Colon	TCGA-AZ-6607	64dcf1a5-c78c-4d3f-852c-15865b3b6189	Not Available	Not Available	Not Available	Not Available	2	-25448	97	0	Not Available	Not Available	NA																								NOT HISPANIC OR LATINO	NA
TCGA-CM-6166	669	0	T2	N0	M0	Stage I	NA			48	Ascending Colon	TCGA-CM-6166	aedde4a5-6520-40b9-9721-c9b826490b7a	NO	Not Available	Not Available	NO	19	-17807	Not Applicable	0	424	Not Available	NA																								NOT HISPANIC OR LATINO	NA
TCGA-T9-A92H	362	0	T3	N0	M0	Stage IIA	NA			82	Sigmoid Colon	TCGA-T9-A92H	81A7184E-F9F5-4E3F-9603-5F5642386C1E	NO	Not Available	53	NO	30	-30058	Not Applicable	0	0	Not Available	NA																								NOT HISPANIC OR LATINO	NA
TCGA-AD-6895	763	0	T3	N1a	M0	Stage IIIB	NA			84	Cecum	TCGA-AD-6895	4f601d7b-8db1-4c6d-9374-21dcd804980d	NO	Not Available	1	NO	22	-30879	Not Applicable	0	22	Not Available	NA																								NOT HISPANIC OR LATINO	NA
TCGA-F4-6808	1024	0	T1	N0	M0	Stage I	NA			54	Sigmoid Colon	TCGA-F4-6808	4a785dc7-f5f6-4607-a19d-e6354b2fb5a9	NO	Not Available	Not Available	NO	31	-19803	Not Applicable	0	14	Not Available	NA																								NOT HISPANIC OR LATINO	NA
TCGA-D5-6540	491	0	T2	N0	M0	Stage I	NA			66	Cecum	TCGA-D5-6540	b08b5f49-9434-4653-9772-097ec29b2ca3	Not Available	Not Available	Not Available	YES	16	-24282	Not Applicable	0	186	Not Available	NA																								NOT HISPANIC OR LATINO	NA
TCGA-AD-6901	682	1	T3	N0	MX		NA			78	Cecum	TCGA-AD-6901	b76d1de7-6447-474d-bf67-77e0bb2da73a	NO	Not Available	1	NO	25	-28579	Not Applicable	0	31	Not Available	NA	TCGA-AD-6901-D47119	CCB03758-E07C-42D8-B066-C6C9C73796AC	Not Available	22	214	61	Xeloda	Complete Response	8	Not Available	Not Available	Not Available	Not Available	Not Applicable	Not Available	Not Available	NO	Chemotherapy	Not Available	Not Available	Not Available	NO	2013	Not Available	NA
TCGA-D5-6927	287	0	T3	N0	M0	Stage IIA	NA			34	Transverse Colon	TCGA-D5-6927	a782f174-241d-42c6-9bc4-61cc39f8b397	NO	Not Available	13	NO	18	-12737	Not Applicable	0	67	Not Available	NA																								NOT HISPANIC OR LATINO	NA
TCGA-G4-6627	2175	0	T3	N0	M0	Stage IIA	NA			84	Ascending Colon	TCGA-G4-6627	19089ae0-b590-4649-9d94-a147fa506e32	NO	Not Available	6	YES	14	-30697	Not Applicable	0	1434	Not Available	NA																								NOT HISPANIC OR LATINO	NA
TCGA-DM-A1D0	3974	0	T3	N0	M0	Stage IIA	NA			79	Sigmoid Colon	TCGA-DM-A1D0	1b0b0533-7c4f-4edd-a75e-8b56f49d54ab	YES	Normal	Not Available	Not Available	Not Available	-28875	Not Applicable	0	3625	3625	NA																								NOT HISPANIC OR LATINO	NA
TCGA-G4-6295	254	0	T3	N0	M0	Stage II	NA			70	Cecum	TCGA-G4-6295	e17959bd-045d-4540-b43a-c3863e8ff3c0	NO	Not Available	Not Available	YES	28	-25758	Not Applicable	0	254	Not Available	NA																								NOT HISPANIC OR LATINO	NA
TCGA-NH-A50U	334	1	T4a	N0	M1a	Stage IVA	NA			42	Cecum	TCGA-NH-A50U	9D68516E-7E5C-403E-8ACA-EA1ABE0D6014	NO	Not Available	5	YES	8	-15450	334	0	Not Available	Not Available	NA	TCGA-NH-A50U-D55540;TCGA-NH-A50U-D55541;TCGA-NH-A50U-D55542;TCGA-NH-A50U-D55544;TCGA-NH-A50U-D55545;TCGA-NH-A50U-D55546;TCGA-NH-A50U-D55547	7EC61416-55CA-4A5A-8732-EAFED12F5DBC;1E720CC7-E366-4CE8-9105-592433C65063;5DC389D6-7100-4C95-9EEA-2FAEC49C30E9;BC6D54D8-A6D1-46EA-B3C9-6672E953FD2D;BAE5FBCF-0997-4137-9D72-74785EBD0A67;82B8C7FF-E00A-425B-8E6C-831795E65E18;AE3FD02D-394D-4F6E-8768-2E54B0E05B02	Not Available;Not Available;Not Available;Not Available;Not Available;Not Available;Not Available	8;8;8;8;8;8;8	189;189;266;266;253;113;Not Available	21;21;21;21;238;98;280	leucovorin calcium;oxaliplatin;bevacizumab;fluorouracil;avastin;capecitabine;regorafenib	Partial Response;Partial Response;Clinical Progressive Disease;Clinical Progressive Disease;Clinical Progressive Disease;Clinical Progressive Disease;Clinical Progressive Disease	1;1;1;1;1;1;1	Not Available;Not Available;Not Available;Not Available;Not Available;Not Available;Not Available	Not Available;Not Available;Not Available;Not Available;Not Available;Not Available;Not Available	Not Available;Not Available;Not Available;Not Available;Not Available;Not Available;Not Available	Not Available;Not Available;Not Available;Not Available;Not Available;Not Available;Not Available	Not Applicable;Not Applicable;Not Applicable;Not Applicable;Not Applicable;Not Applicable;Not Applicable	Not Available;Not Available;Not Available;Not Available;Not Available;Not Available;Not Available	Not Available;Not Available;Not Available;Not Available;Not Available;Not Available;Not Available	NO;NO;NO;NO;NO;NO;NO	Ancillary;Chemotherapy;Chemotherapy;Chemotherapy;Immunotherapy;Chemotherapy;Chemotherapy	Not Available;Not Available;Not Available;Not Available;Not Available;Not Available;Not Available	Not Available;Not Available;Not Available;Not Available;Not Available;Not Available;Not Available	Not Available;Not Available;Not Available;Not Available;Not Available;Not Available;Not Available	NO;NO;NO;NO;NO;NO;NO	2014;2014;2014;2014;2014;2014;2014	NOT HISPANIC OR LATINO	NA
TCGA-AA-3509	1915	0	T3	N0	M0	Stage II	NA			54	Sigmoid Colon	TCGA-AA-3509	80e677b1-5ebe-4069-a1a5-1538ffee6642	NO	Not Available	Not Available	Not Available	18	-19786	Not Applicable	0	0	Not Available	NA																								Not Available	NA
TCGA-CM-4751	822	0	T3	N1b	M0	Stage IIIB	NA			62	Cecum	TCGA-CM-4751	e3ca9046-9634-4332-b19f-88b18110f941	NO	Not Available	Not Available	NO	8	-22891	Not Applicable	0	607	Not Available	NA	TCGA-CM-4751-D16812;TCGA-CM-4751-D16809;TCGA-CM-4751-D16808;TCGA-CM-4751-D16811	38f342e3-3027-4015-9bd8-e32b4147942b;ea440ecc-252e-439d-80d0-8b9ddf66e13c;ebbc8014-2a28-4c55-a8cf-ad5368fff25c;7814e988-0038-4dcb-8e97-89c1cbbb1f6f	Not Available;Not Available;Not Available;Not Available	26;26;26;26	208;208;208;208	54;54;54;54	Oxaliplatin;Fluorouracil;Fluorouracil;Leucovorin Calcium	Not Available;Not Available;Not Available;Not Available	9;9;9;9	12;12;12;12	150;2800;900;900	mg;mg;mg;mg	ADJUVANT;ADJUVANT;ADJUVANT;ADJUVANT	Not Applicable;Not Applicable;Not Applicable;Not Applicable	1;1;1;1	IV;IV;IV;IV	NO;NO;NO;NO	Chemotherapy;Chemotherapy;Chemotherapy;Other, specify in notes	Not Available;Not Available;Not Available;Ancillary	1950;28200;9450;9450	mg;mg;mg;mg	Not Available;Not Available;Not Available;Not Available	2011;2011;2011;2011	NOT HISPANIC OR LATINO	NA
TCGA-A6-2681	1387	0	T3	N0	M0	Stage IIA	NA			73	Cecum	TCGA-A6-2681	7d8eab0a-e6c8-4449-9ebf-50c41db94a06	NO	Not Available	Not Available	NO	14	-26929	Not Applicable	0	552	Not Available	NA																								NOT HISPANIC OR LATINO	NA
TCGA-D5-6537	146	1	T3	N1a	MX	Stage IIIB	NA			64	Transverse Colon	TCGA-D5-6537	ebc5a6f8-34fd-48c1-a2b9-7f60f45fbf27	NO	Not Available	18	YES	9	-23381	Not Applicable	0	137	Not Available	NA																								NOT HISPANIC OR LATINO	NA
TCGA-CM-6167	456	0	T3	N2b	M0	Stage IIIC	NA			57	Cecum	TCGA-CM-6167	d42bc7f0-cfb2-4ece-ae47-521308635633	NO	Not Available	Not Available	YES	19	-21031	Not Applicable	0	122	Not Available	NA																								NOT HISPANIC OR LATINO	NA
TCGA-A6-4107	987	0	T3	N1b	M0	Stage IIIB	NA			57	Ascending Colon	TCGA-A6-4107	b079a153-62f9-4026-a2f8-a1390168bbb9	NO	Not Available	Not Available	NO	4	-21064	Not Applicable	0	231	Not Available	NA	TCGA-A6-4107-D7159;TCGA-A6-4107-D7160;TCGA-A6-4107-D7151;TCGA-A6-4107-D7158	fc232b41-59b3-4ad0-a64c-ec240b773181;efcd9394-67ff-45db-a8c8-2a14eafa65f6;4e2c6d3a-81e4-478e-9011-aa1486b9be7b;f448b097-dfa4-4115-9bcc-0bfb694afc51	Not Available;Not Available;Not Available;Not Available	4;4;4;4	197;199;197;197	50;50;50;50	5 FU;5 FU;Oxaliplatin;Leucovorin	Not Available;Not Available;Not Available;Not Available	2;2;2;2	11;11;11;11	546-752;3276-4512;77-160;50-750	mg;mg;mg;mg	ADJUVANT;ADJUVANT;ADJUVANT;ADJUVANT	Not Applicable;Not Applicable;Not Applicable;Not Applicable	1;1;1;1	IV;IV;IV;IV	NO;NO;NO;NO	Chemotherapy;Chemotherapy;Chemotherapy;Other, specify in notes	Not Available;Not Available;Not Available;Ancillary	7800;46800;1414;4050	mg;mg;mg;mg	Not Available;Not Available;Not Available;Not Available	2011;2011;2011;2011	NOT HISPANIC OR LATINO	NA
TCGA-AU-6004	824	0	T2	N0	M0	Stage I	NA			69	Cecum	TCGA-AU-6004	32b77693-18e1-4692-8488-add1940c9e7c	NO	Not Available	90	NO	3	-25259	Not Applicable	0	203	Not Available	NA																								NOT HISPANIC OR LATINO	NA
TCGA-AZ-5407	2683	0	T1	N0	M0	Stage I	NA			51	Cecum	TCGA-AZ-5407	b718134c-5231-4f29-a423-7bad17c93fc5	Not Available	Not Available	Not Available	Not Available	29	-18820	Not Applicable	0	1395	Not Available	NA																								NOT HISPANIC OR LATINO	NA
TCGA-AY-6197	652	0	T3	N0		Stage IIA	NA			60	Cecum	TCGA-AY-6197	f6c674bf-396d-4bfe-8d08-e7266c314be3	NO	Not Available	Not Available	NO	14	-21957	Not Applicable	0	113	Not Available	NA																								NOT HISPANIC OR LATINO	NA
TCGA-AZ-4615	1002	0	T3	N1	M0	Stage IIIB	NA			84	Not Available	TCGA-AZ-4615	bf69a4ce-ec7e-4752-a86d-dcc80e3c9a57	Not Available	Not Available	50	Not Available	22	-30908	Not Applicable	0	506	Not Available	NA	TCGA-AZ-4615-D20214	9550a75a-dc24-400b-92c2-7665b57c6325	Not Available	6	264	89	XELODA	Not Available	1	8	Not Available	Not Available	ADJUVANT	Not Applicable	Not Available	PO	NO	Chemotherapy	Not Available	Not Available	Not Available	Not Available	2012	NOT HISPANIC OR LATINO	NA
TCGA-AA-3494	31	0	T3	N0	M1	Stage IV	NA			55	Sigmoid Colon	TCGA-AA-3494	67ba29e7-f294-4dcd-9630-ad768c22c588	NO	Not Available	Not Available	Not Available	18	-20089	Not Applicable	0	31	Not Available	NA	TCGA-AA-3494-D37440;TCGA-AA-3494-D37441;TCGA-AA-3494-D37442;TCGA-AA-3494-D37443;TCGA-AA-3494-D37444;TCGA-AA-3494-D37445	96AC2755-D00C-43F2-AF85-250EEE267909;22607192-21C1-46B1-9007-82F8207BD46F;8D724D6C-49CF-4BD7-840D-2DF9295914B5;43259854-0480-42D0-98A2-F62606319067;2F9DDCC4-8761-4EF4-9C8C-9487B219A252;D326355B-264D-4391-9026-C1B14D59A663	Not Available;Not Available;Not Available;Not Available;Not Available;Not Available	3;3;3;3;3;3	184;184;792;334;1065;1065	92;92;184;212;334;792	Folinic acid;5-Fluorouracil;Capecitabine;Oxaliplatin;Irinotecan;Cetuximab	Partial Response;Partial Response;Stable Disease;Partial Response;Stable Disease;Stable Disease	12;12;12;12;12;12	Not Available;Not Available;Not Available;Not Available;Not Available;Not Available	Not Available;Not Available;Not Available;Not Available;Not Available;Not Available	Not Available;Not Available;Not Available;Not Available;Not Available;Not Available	Not Available;Not Available;Not Available;Not Available;Not Available;Not Available	Not Applicable;Not Applicable;Not Applicable;Not Applicable;Not Applicable;Not Applicable	Not Available;Not Available;Not Available;Not Available;Not Available;Not Available	Not Available;Not Available;Not Available;Not Available;Not Available;Not Available	NO;NO;NO;NO;NO;NO	Chemotherapy;Chemotherapy;Chemotherapy;Chemotherapy;Chemotherapy;Targeted Molecular therapy	Not Available;Not Available;Not Available;Not Available;Not Available;Not Available	Not Available;Not Available;Not Available;Not Available;Not Available;Not Available	Not Available;Not Available;Not Available;Not Available;Not Available;Not Available	NO;NO;NO;NO;NO;NO	2012;2012;2012;2012;2012;2012	Not Available	NA
TCGA-QG-A5Z1	256	1	T3	N1b	MX	Stage IIIB	NA			71	Sigmoid Colon	TCGA-QG-A5Z1	9C45EAEC-D854-4F51-80A3-2D80D6B4AEBC	NO	Not Available	5	NO	20	-26220	Not Applicable	0	202	Not Available	NA	TCGA-QG-A5Z1-D44489	807D7DF2-414D-4DA2-9BC6-74DBA0713296	Not Available	17	Not Available	Not Available	Not Available	Complete Response	2	Not Available	Not Available	Not Available	Not Available	Not Applicable	Not Available	Not Available	NO	Chemotherapy	Not Available	Not Available	Not Available	NO	2014	NOT HISPANIC OR LATINO	NA
TCGA-A6-6651	662	0	T3	N1b	MX	Stage IIIB	NA			55	Transverse Colon	TCGA-A6-6651	0ec6ed47-db99-4273-9823-ffbde6a77091	NO	Not Available	Not Available	YES	7	-20110	Not Applicable	0	249	Not Available	NA	TCGA-A6-6651-D18528;TCGA-A6-6651-D18527;TCGA-A6-6651-D18529;TCGA-A6-6651-D18530	a528abe3-9cc5-4833-8f81-9086291a9c00;8ab6ac64-e947-4bbd-85c6-2e8d7b472d87;74c23414-80cb-4ae3-bcf2-a52122118f4f;1d1b2876-8f89-4115-a26e-e437e8174fc0	Not Available;Not Available;Not Available;Not Available	18;18;18;18	247;205;249;247	77;77;77;77	Leucovorin;Oxaliplatin;Fluorouracil;Fluorouracil	Not Available;Not Available;Not Available;Not Available	11;11;11;11	12;9;12;12	50-350;130-164;4560-4704;760-784	mg;mg;mg;mg	ADJUVANT;ADJUVANT;ADJUVANT;ADJUVANT	Not Applicable;Not Applicable;Not Applicable;Not Applicable	1;1;1;1	IV;IV;IV;IV	NO;NO;NO;NO	Other, specify in notes;Chemotherapy;Chemotherapy;Chemotherapy	Ancillary;Not Available;Not Available;Not Available	1150;1304;55368;9228	mg;mg;mg;mg	Not Available;Not Available;Not Available;Not Available	2011;2011;2011;2011	NOT HISPANIC OR LATINO	NA
TCGA-CM-5862	153	1	T3	N1a	M1a	Stage IVA	NA			80	Ascending Colon	TCGA-CM-5862	a19cd9f8-482b-4b70-b7d7-06d6bb1b0260	YES	Normal	Not Available	YES	18	-29493	153	0	Not Available	Not Available	NA																								NOT HISPANIC OR LATINO	NA
TCGA-D5-5541	1701	0	T3	N1a	M0	Stage IIIB	NA			63	Sigmoid Colon	TCGA-D5-5541	94067eb7-98b7-4975-bab1-c09e1b454a25	NO	Not Available	36	NO	25	-23109	Not Applicable	0	202	Not Available	NA	TCGA-D5-5541-D13833	a81be0b5-fa86-4b78-91df-05546d47d69c	Not Available	4	279	19	Calcium Foliatum, fluorouracilum, oxaliplatinum, dexamethassone	Not Available	7	12	Calcium Foliatum 768mg, fluorouracilum 3890mg, oxaliplatinum 163,2mg, dexamethassone 8mg	mg	ADJUVANT	Not Applicable	FOL FOX4	IV	NO	Chemotherapy	Not Available	Not Available	mg	Not Available	2011	NOT HISPANIC OR LATINO	NA
TCGA-G4-6310	1935	0	T3	N1	M0	Stage IIIB	NA			69	Cecum	TCGA-G4-6310	14c13b05-abfe-472e-83a9-b28f60e58ad8	NO	Not Available	8	NO	6	-25243	Not Applicable	0	1205	Not Available	NA	TCGA-G4-6310-D21934;TCGA-G4-6310-D21935;TCGA-G4-6310-D21938;TCGA-G4-6310-D21933;TCGA-G4-6310-D21937;TCGA-G4-6310-D21928;TCGA-G4-6310-D21936	ced5bc62-7f2c-48e6-b830-f6f4a131fb03;5e979430-9982-4b1b-8485-4805ba371049;477f4c3c-ef6e-4873-9d95-3b1aa1e0d9a9;892163e8-62fc-4fbe-a0ed-712508e46f84;7648d80e-9205-4675-b34d-f82fa7ab36a7;cb1310c0-860e-4d70-a72e-96e0fdc38613;1b57d686-2c1f-43ea-a842-1360b246b826	Not Available;Not Available;Not Available;Not Available;Not Available;Not Available;Not Available	25;25;25;25;25;25;25	76;132;194;76;194;76;194	34;90;153;34;153;34;153	5-FU;Xeloda;5-FU;Leucovorin;Leucovorin;Oxaliplatin;Oxaliplatin	Not Available;Not Available;Not Available;Not Available;Not Available;Not Available;Not Available	1;1;1;1;1;1;1	4;Not Available;4;4;4;4;4	Not Available;3000;Not Available;840;800;180;170	Not Available;mg/day;Not Available;mg;mg;mg;mg	ADJUVANT;ADJUVANT;ADJUVANT;ADJUVANT;ADJUVANT;ADJUVANT;ADJUVANT	Not Applicable;Not Applicable;Not Applicable;Not Applicable;Not Applicable;Not Applicable;Not Applicable	1;2;3;1;3;1;3	Not Available;PO;Not Available;IV;IV;IV;IV	NO;NO;NO;NO;NO;NO;NO	Chemotherapy;Chemotherapy;Chemotherapy;Other, specify in notes;Other, specify in notes;Chemotherapy;Chemotherapy	Not Available;Not Available;Not Available;Ancillary;Ancillary;Not Available;Not Available	Not Available;90000;Not Available;3200;3200;684;680	Not Available;mg;Not Available;mg;mg;mg;mg	Not Available;Not Available;Not Available;Not Available;Not Available;Not Available;Not Available	2012;2012;2012;2012;2012;2012;2012	NOT HISPANIC OR LATINO	NA
TCGA-AU-3779	441	0	T3	N0	M0	Stage IIA	NA			80	Rectosigmoid Junction	TCGA-AU-3779	fb4cc403-694c-421f-b360-3108b6d57ad5	NO	Not Available	35	NO	28	-29460	Not Applicable	0	441	Not Available	NA																								NOT HISPANIC OR LATINO	NA
TCGA-F4-6461	338	1	T4b	N2	M0	Stage IIIC	NA			41	Hepatic Flexure	TCGA-F4-6461	2900eadd-7e27-4371-94e5-7d58cdff0138	NO	Not Available	Not Available	NO	20	-15151	Not Applicable	0	0	Not Available	NA																								NOT HISPANIC OR LATINO	NA
TCGA-F4-6460	972	1	T3	N1	M0	Stage IIIB	NA			51	Sigmoid Colon	TCGA-F4-6460	2a7bbafe-d499-4241-ba3d-a52ba0a5db3c	NO	Not Available	Not Available	NO	20	-18637	Not Applicable	0	0	Not Available	NA	TCGA-F4-6460-D29825;TCGA-F4-6460-D29827;TCGA-F4-6460-D29828	24A4BE6E-8504-46A7-9FE6-9F601A1E0AAA;E00AA1AF-9E7F-47DD-BA9D-3662DCE2FD87;DE75E343-2A6A-4264-A2B7-1F99A217E0C7	Not Available;Not Available;Not Available	29;29;29	229;138;Not Available	26;26;313	Capecitabine;Oxaliplatin;Raltitrexed	Not Available;Not Available;Not Available	3;3;3	10;6;5	4;150;4	g/day;mg/day;g/day	ADJUVANT;ADJUVANT;ADJUVANT	Not Applicable;Not Applicable;Not Applicable	Not Available;Not Available;Not Available	PO;IV;IV	NO;NO;YES	Chemotherapy;Chemotherapy;Chemotherapy	Not Available;Not Available;Not Available	640;900;20	g/day;mg;Not Available	Not Available;Not Available;Not Available	2012;2012;2012	NOT HISPANIC OR LATINO	NA
TCGA-AA-3496	31	0	T3	N0	M0	Stage II	NA			83	Ascending Colon	TCGA-AA-3496	639e1050-088a-48fe-a0ef-4a01a3468cac	NO	Not Available	Not Available	Not Available	18	-30438	Not Applicable	0	31	Not Available	NA																								Not Available	NA
TCGA-AA-3492	1	1	T3	N0	M0	Stage II	NA			90	Ascending Colon	TCGA-AA-3492	85e95dda-6198-464a-9187-fd0832bebb72	NO	Not Available	Not Available	Not Available	18	-32871	Not Applicable	0	0	Not Available	NA																								Not Available	NA
TCGA-CA-6719	435	0	T3	N0	M0	Stage IIA	NA			77	Descending Colon	TCGA-CA-6719	9cdca5d8-ea77-4df9-b2ba-0d5e8ec37bcd	Not Available	Not Available	Not Available	Not Available	8	-28343	Not Applicable	0	41	Not Available	NA																								NOT HISPANIC OR LATINO	NA
TCGA-CM-4752	396	0	T3	N0	M0	Stage IIA	NA			58	Ascending Colon	TCGA-CM-4752	7ea546ce-f48a-4d9c-96b4-a0124c692870	NO	Not Available	Not Available	NO	10	-21519	Not Applicable	0	123	Not Available	NA																								NOT HISPANIC OR LATINO	NA
TCGA-CK-6746	0	0	T4b	N0	MX	Stage IIB	NA			84	Cecum	TCGA-CK-6746	a6f98ee5-9638-4ebe-804b-fba54aea9f90	NO	Not Available	20	NO	Not Available	-30957	Not Applicable	0	0	Not Available	NA																								NOT HISPANIC OR LATINO	NA
TCGA-D5-6539	380	0	T3	N0	M0		NA			45	Transverse Colon	TCGA-D5-6539	ef4bb5bf-4535-4bd1-8a74-aba920123ee2	NO	Not Available	Not Available	Not Available	9	-16703	Not Applicable	0	145	Not Available	NA																								NOT HISPANIC OR LATINO	NA
TCGA-CM-6164	883	0	T3	N0	M0	Stage IIA	NA			46	Sigmoid Colon	TCGA-CM-6164	6a4031c6-ee88-48be-81a5-a522720edd02	NO	Not Available	Not Available	NO	19	-16802	Not Applicable	0	487	Not Available	NA																								NOT HISPANIC OR LATINO	NA
TCGA-DM-A28M	2895	0	T3	N0	M0	Stage IIA	NA			63	Descending Colon	TCGA-DM-A28M	C48E2CE0-3806-4675-92F3-D38FF67C5EFA	YES	Normal	Not Available	Not Available	27	-23043	Not Applicable	0	2775	Not Available	NA																								NOT HISPANIC OR LATINO	NA
TCGA-AZ-6608	59	1	T2	N1	M0	Stage IIIA	NA			55	Sigmoid Colon	TCGA-AZ-6608	f1e6ce83-b4a0-4643-8e8e-a1ef8a158a27	Not Available	Not Available	Not Available	Not Available	2	-20094	59	0	Not Available	Not Available	NA																								NOT HISPANIC OR LATINO	NA
TCGA-5M-AATE	1200	0	T3	N0	M0	Stage IIA	NA			76	Ascending Colon	TCGA-5M-AATE	A54B322B-80D3-435C-8D14-25841B741F6C	NO	Not Available	Not Available	NO	27	-27870	Not Applicable	0	1200	Not Available	NA																								HISPANIC OR LATINO	NA
TCGA-DM-A282	4233	0	T3	N0	M0	Stage IIA	NA			60	Hepatic Flexure	TCGA-DM-A282	E75985CB-357E-4072-B047-EEA37965D70C	YES	Normal	Not Available	NO	27	-22265	Not Applicable	0	4122	Not Available	NA																								NOT HISPANIC OR LATINO	NA
TCGA-A6-A566	758	1	T4	N1	M0	Stage IIIB	NA			55	Descending Colon	TCGA-A6-A566	790266BC-C252-43F4-85D1-1B06EE529CF8	Unknown	Not Available	Not Available	NO	15	-20181	758	0	Not Available	Not Available	NA	TCGA-A6-A566-D42252;TCGA-A6-A566-D42254;TCGA-A6-A566-D42262;TCGA-A6-A566-D42264	74C0E183-B802-4EFC-BD08-FCBB9930035D;F111779F-8AA9-4640-9CCE-7CA1D108F7CE;843A4503-B4D5-4C02-8919-45C327BA724F;4F12D452-984F-40FF-A277-8CDEDCAA4B42	Not Available;Not Available;Not Available;Not Available	15;15;15;15	237;251;251;253	76;76;76;76	Oxaliplatin;Fluorouracil;Leucovorin;Fluorouracil	Clinical Progressive Disease;Clinical Progressive Disease;Clinical Progressive Disease;Clinical Progressive Disease	4;4;4;4	Not Available;Not Available;Not Available;Not Available	Not Available;Not Available;Not Available;Not Available	Not Available;Not Available;Not Available;Not Available	Not Available;Not Available;Not Available;Not Available	Not Applicable;Not Applicable;Not Applicable;Not Applicable	Not Available;Not Available;Not Available;Not Available	Not Available;Not Available;Not Available;Not Available	NO;NO;NO;NO	Chemotherapy;Chemotherapy;Ancillary;Chemotherapy	Not Available;Not Available;Not Available;Not Available	Not Available;Not Available;Not Available;Not Available	Not Available;Not Available;Not Available;Not Available	NO;NO;NO;NO	2013;2013;2013;2013	NOT HISPANIC OR LATINO	NA
TCGA-5M-AAT4	49	1	T3	N0	M1b	Stage IV	NA			74	Ascending Colon	TCGA-5M-AAT4	1136DD50-242A-4659-AAD4-C53F9E759BB3	NO	Not Available	Not Available	YES	27	-27095	49	0	Not Available	Not Available	NA																								HISPANIC OR LATINO	NA
TCGA-CM-4747	761	0	T4a	N1b	M1a	Stage IVA	NA			47	Cecum	TCGA-CM-4747	56eb96a4-d2c2-42fb-b26c-1a80012bcb8e	NO	Not Available	Not Available	YES	23	-17198	Not Applicable	0	244	Not Available	NA	TCGA-CM-4747-D8966;TCGA-CM-4747-D8958;TCGA-CM-4747-D8964;TCGA-CM-4747-D8956;TCGA-CM-4747-D8959	75a88a6f-c67a-4802-a0fe-6962eb8331f4;a5741352-2a80-414c-8129-cf4997f46eb0;41e99931-ad70-4652-8a54-e3f9d30b28b4;cbe7aceb-2049-4af1-b953-31d04eb6176f;559f4cb9-8305-40ca-8643-2a5077baa4b1	Not Available;Not Available;Not Available;Not Available;Not Available	17;17;17;17;17	254;252;225;252;252	114;98;98;98;98	Pegfilgrastim;Fluorouracil;Oxaliplatin;Fluorouracil;Leucovorin	Not Available;Not Available;Not Available;Not Available;Not Available	1;1;1;1;1	11;12;10;12;12	6;410-850;180;2500;410-850	mg;mg;mg;mg;mg	ADJUVANT;ADJUVANT;ADJUVANT;ADJUVANT;ADJUVANT	Not Applicable;Not Applicable;Not Applicable;Not Applicable;Not Applicable	1;1;1;1;1	SC;IV;IV;IV;IV	NO;NO;NO;NO;NO	Other, specify in notes;Chemotherapy;Chemotherapy;Chemotherapy;Other, specify in notes	Ancillary;Not Available;Not Available;Not Available;Ancillary	66;5360;1800;30000;5360	mg;mg;mg;mg;mg	Not Available;Not Available;Not Available;Not Available;Not Available	2011;2011;2011;2011;2011	NOT HISPANIC OR LATINO	NA
TCGA-AY-5543	1004	0	T3	N1a	M1	Stage IVA	NA			65	Ascending Colon	TCGA-AY-5543	14cc6f5b-5692-471e-98b4-ae200b3d8fed	NO	Not Available	Not Available	NO	7	-23870	Not Applicable	0	230	Not Available	NA	TCGA-AY-5543-D19914;TCGA-AY-5543-D19915;TCGA-AY-5543-D19916	aea534a6-3b75-4e1b-b24f-56f269f3fa86;3fe50558-8e39-4aa2-9862-d96cf58a0c6f;465c3779-5d7e-4817-8fd0-d76b54c4dfff	Not Available;Not Available;Not Available	4;4;4	251;251;251	60;60;60	Oxaliplatin;Leucovorin;5FU	Not Available;Not Available;Not Available	1;1;1	12;12;12	85;200;2800	mg/m2;mg/m2;mg/m2	ADJUVANT;ADJUVANT;ADJUVANT	Not Applicable;Not Applicable;Not Applicable	1;1;1	IV;IV;IV	NO;NO;NO	Chemotherapy;Other, specify in notes;Chemotherapy	Not Available;Ancillary agent;Not Available	Not Available;Not Available;Not Available	Not Available;Not Available;Not Available	Not Available;Not Available;Not Available	2012;2012;2012	NOT HISPANIC OR LATINO	NA
TCGA-D5-5540	1706	0	T3	N0	M0	Stage IIA	NA			73	Cecum	TCGA-D5-5540	31d960d7-8f5b-4d22-bf5e-fae0849c4efd	NO	Not Available	70	NO	25	-26972	Not Applicable	0	198	Not Available	NA																								NOT HISPANIC OR LATINO	NA
TCGA-QG-A5Z2	952	0	T2	N0	M0	Stage I	NA			61	Cecum	TCGA-QG-A5Z2	84959E50-17F5-4F2B-8E0C-5EBB139D2C3A	NO	Not Available	Not Available	YES	20	-22367	Not Applicable	0	449	Not Available	NA																								NOT HISPANIC OR LATINO	NA
TCGA-CM-5863	457	0	T3	N1b	M0	Stage IIIB	NA			60	Ascending Colon	TCGA-CM-5863	cc1d6ad3-b60d-482e-8fa4-0af26823007d	NO	Not Available	Not Available	NO	26	-22127	Not Applicable	0	304	Not Available	NA	TCGA-CM-5863-D17066;TCGA-CM-5863-D17062;TCGA-CM-5863-D17068;TCGA-CM-5863-D17065;TCGA-CM-5863-D17064	8419859d-441b-466d-9c75-b60790d0a64b;2e32a9b2-feed-4616-84aa-8c1d6ca8acd6;8ed1a0ab-3763-46c2-9f61-21677b677973;93087750-78fd-430a-9c55-be528ae2e4bb;999f4791-5483-46b6-b0e8-cec6ba836469	Not Available;Not Available;Not Available;Not Available;Not Available	30;30;30;30;30	240;240;229;240;240	86;86;229;86;86	Oxaliplatin;Fluorouracil;Pegfilgrastim;Leucovorin Calcium;Fluorouracil	Not Available;Not Available;Not Available;Not Available;Not Available	9;9;9;9;9	12;12;1;12;12	140;650;6;650;1900	mg;mg;mg;mg;mg	ADJUVANT;ADJUVANT;ADJUVANT;ADJUVANT;ADJUVANT	Not Applicable;Not Applicable;Not Applicable;Not Applicable;Not Applicable	1;1;1;1;1	IV;IV;SC;IV;IV	NO;NO;NO;NO;NO	Chemotherapy;Chemotherapy;Other, specify in notes;Other, specify in notes;Chemotherapy	Not Available;Not Available;Ancillary;Ancillary;Not Available	1510;7450;6;5000;21800	mg;mg;mg;mg;mg	Not Available;Not Available;Not Available;Not Available;Not Available	2011;2011;2011;2011;2011	NOT HISPANIC OR LATINO	NA
TCGA-AZ-4681	3247	0	T3	N0	M0	Stage IIA	NA			79	Ascending Colon	TCGA-AZ-4681	6fbc2b46-6762-4778-aa7e-782162c5397c	Not Available	Not Available	Not Available	YES	22	-28906	Not Applicable	0	2180	Not Available	NA																								NOT HISPANIC OR LATINO	NA
TCGA-A6-6781	598	0	T4b	N1b	MX	Stage IIIC	NA	FPPP	TCGA	43	Discrepancy	TCGA-A6-6781	b54865b6-824e-4163-b759-21a6eacc98ce	NO	Not Available	Not Available	YES	1	-15842	Not Applicable	0	158	Not Available	NA	TCGA-A6-6781-D29217;TCGA-A6-6781-D29222;TCGA-A6-6781-D29223;TCGA-A6-6781-D29219	8bf9874b-b3a3-4f9f-a2fd-d5f1c20afc24;d19e09cd-4f33-4fdc-98be-45cb96a40be2;15555c80-b097-4e8e-a035-7b621c250a15;c2c8bb68-9f4d-4197-8e3e-b42eb78201c6	Not Available;Not Available;Not Available;Not Available	12;12;12;12	158;221;223;221	32;32;32;32	Oxaliplatin;Fluorouracil;Fluorouracil;Leucovorin	Not Available;Not Available;Not Available;Not Available	3;3;3;3	8;12;12;12	113-189;872-936;5232-5616;50-900	mg;mg;mg;mg	ADJUVANT;ADJUVANT;ADJUVANT;ADJUVANT	Not Applicable;Not Applicable;Not Applicable;Not Applicable	1;1;1;1	IV;IV;IV;IV	NO;NO;NO;NO	Chemotherapy;Chemotherapy;Chemotherapy;Other, specify in notes	Not Available;Not Available;Not Available;Ancillary	1308;10832;64992;2000	mg;mg;mg;mg	Not Available;Not Available;Not Available;Not Available	2012;2012;2012;2012	NOT HISPANIC OR LATINO	NA
TCGA-NH-A50V	588	0	T3	N2a	M0	Stage IIIB	NA			69	Cecum	TCGA-NH-A50V	D3B7ADA6-5395-4212-A921-8E97C92B605D	NO	Not Available	0.45	NO	8	-25467	Not Applicable	0	154	Not Available	NA	TCGA-NH-A50V-D40977;TCGA-NH-A50V-D40978;TCGA-NH-A50V-D67775	86D33EB0-1853-4CA8-9F9A-BF0D9C9B2279;1543E54E-1A13-4C79-B149-E1B59A6882F6;16E59916-25D8-47FA-BCB8-D292AF311082	Not Available;Not Available;Not Available	8;8;11	210;210;210	22;53;53	fluorouracil;oxaliplatin;leucovorin	Complete Response;Complete Response;Complete Response	3;3;11	Not Available;Not Available;Not Available	Not Available;Not Available;Not Available	Not Available;Not Available;Not Available	Not Available;Not Available;Not Available	Not Applicable;Not Applicable;Not Applicable	Not Available;Not Available;Not Available	Not Available;Not Available;Not Available	NO;NO;NO	Chemotherapy;Chemotherapy;Ancillary	Not Available;Not Available;Not Available	Not Available;Not Available;Not Available	Not Available;Not Available;Not Available	NO;NO;NO	2013;2013;2014	NOT HISPANIC OR LATINO	NA
TCGA-DM-A280	236	1	T3	N0	M0	Stage IIA	NA			70	Ascending Colon	TCGA-DM-A280	6775CE57-B4CF-425C-A898-061BB9A8A1A8	YES	Normal	Not Available	NO	27	-25649	236	0	236	Not Available	NA																								NOT HISPANIC OR LATINO	NA
TCGA-A6-6138	685	0	T2	N0	M0	Stage I	NA			61	Cecum	TCGA-A6-6138	4ad9784e-1edc-4186-9b45-4dfe0003f74b	NO	Not Available	Not Available	YES	2	-22523	Not Applicable	0	182	Not Available	NA																								NOT HISPANIC OR LATINO	NA
TCGA-G4-6311	1199	0	T3	N1	MX	Stage III	NA			80	Ascending Colon	TCGA-G4-6311	79d33c28-a7e2-4fca-8be1-a16fb6d68d49	NO	Not Available	Not Available	NO	12	-29297	Not Applicable	0	1112	Not Available	NA	TCGA-G4-6311-D21921;TCGA-G4-6311-D21923;TCGA-G4-6311-D21922	47dfca4c-93b9-421c-be8f-617d251452ae;1e9c5fe9-4666-4187-ab0c-6c2b09dc240a;f10cb485-4558-454a-9a1e-905a5cabba57	Not Available;Not Available;Not Available	27;27;27	148;190;190	36;36;36	Oxaliplatin;Leucovorin;Fluorouracil	Not Available;Not Available;Not Available	1;1;1	9;12;12	152;400;400	mg;mg/m2;mg/m2	ADJUVANT;ADJUVANT;ADJUVANT	Not Applicable;Not Applicable;Not Applicable	1;1;1	IV;IV;IV	NO;NO;NO	Chemotherapy;Chemotherapy;Chemotherapy	Not Available;Not Available;Not Available	1369;4800;4800	mg;mg/m2;mg/m2	Not Available;Not Available;Not Available	2012;2012;2012	NOT HISPANIC OR LATINO	NA
TCGA-QG-A5YV	1301	0	T4b	N1a	MX	Stage IIIC	NA			64	Sigmoid Colon	TCGA-QG-A5YV	C83D38FC-E011-4F75-A100-96513611F3E9	NO	Not Available	4	NO	20	-23499	Not Applicable	0	821	Not Available	NA	TCGA-QG-A5YV-D44472	90AC2E57-1CE1-40BD-A06A-24E02797C282	Not Available	20	174	72	Xeloda	Complete Response	6	Not Available	Not Available	Not Available	Not Available	Not Applicable	Not Available	Not Available	NO	Chemotherapy	Not Available	Not Available	Not Available	NO	2013	NOT HISPANIC OR LATINO	NA
TCGA-D5-6532	555	0	T3	N0	M0	Stage IIA	NA			61	Sigmoid Colon	TCGA-D5-6532	ac13d568-f79e-4ba7-b7bf-18e4354e0920	Not Available	Not Available	10	Not Available	13	-22344	Not Applicable	0	107	Not Available	NA																								NOT HISPANIC OR LATINO	NA
TCGA-AD-6965	805	0	T4a	N2b	M0	Stage IIIC	NA			62	Cecum	TCGA-AD-6965	c8de215d-53a4-4e6c-be58-5887a8094815	NO	Not Available	Not Available	Not Available	17	-22853	Not Applicable	0	6	Not Available	NA	TCGA-AD-6965-D47146;TCGA-AD-6965-D47150;TCGA-AD-6965-D47186;TCGA-AD-6965-D47187;TCGA-AD-6965-D72561;TCGA-AD-6965-D72562	6FD88F0C-8E92-4A08-99F2-27BA67D1E2A1;F1C233D6-4F49-413E-86F4-3272232F0EB1;6F3BBC44-C6FD-4257-8A06-C3B96F2C35BE;8C42CF4F-ED5B-413A-83DC-A315C8C6ED8A;3ED672C0-CD23-4467-B904-44021DC2B3A9;9904C076-BC2D-4783-B9E1-4E983C9C15D4	Not Available;Not Available;Not Available;Not Available;Not Available;Not Available	22;22;22;22;16;16	196;Not Available;Not Available;Not Available;196;196	42;665;665;665;42;42	Oxaliplatin;Avastin;Irinotecan;5-FU;5FU;Leucovorin	Complete Response;Not Applicable;Not Applicable;Not Applicable;Complete Response;Complete Response	8;8;8;8;7;7	Not Available;Not Available;Not Available;Not Available;Not Available;Not Available	Not Available;Not Available;Not Available;Not Available;Not Available;Not Available	Not Available;Not Available;Not Available;Not Available;Not Available;Not Available	Not Available;Not Available;Not Available;Not Available;Not Available;Not Available	Not Applicable;Not Applicable;Not Applicable;Not Applicable;Not Applicable;Not Applicable	Not Available;Not Available;Not Available;Not Available;Not Available;Not Available	Not Available;Not Available;Not Available;Not Available;Not Available;Not Available	NO;YES;YES;YES;NO;NO	Chemotherapy;Chemotherapy;Chemotherapy;Chemotherapy;Chemotherapy;Ancillary	Not Available;Not Available;Not Available;Not Available;Not Available;Not Available	Not Available;Not Available;Not Available;Not Available;Not Available;Not Available	Not Available;Not Available;Not Available;Not Available;Not Available;Not Available	NO;NO;NO;NO;NO;NO	2013;2013;2013;2013;2015;2015	NOT HISPANIC OR LATINO	NA
TCGA-AZ-4313	2310	0	T1	N0	M0	Stage I	NA			51	Descending Colon	TCGA-AZ-4313	1fd75c4d-e74c-410c-a150-814722c6c1cc	Not Available	Not Available	12	Not Available	11	-18765	Not Applicable	0	957	Not Available	NA																								NOT HISPANIC OR LATINO	NA
TCGA-F4-6459	262	1	T3	N2a	M0	Stage IIIB	NA			61	Sigmoid Colon	TCGA-F4-6459	9fd08502-355b-4f5a-a25c-73ec7184f6d3	NO	Not Available	Not Available	NO	20	-22574	Not Applicable	0	0	Not Available	NA																								NOT HISPANIC OR LATINO	NA
TCGA-AA-3662	184	0	T4	N2	M1	Stage IV	NA			80	Sigmoid Colon	TCGA-AA-3662	d9fb85c3-ade1-47bf-8159-170f81eb130f	NO	Not Available	Not Available	Not Available	18	-29554	Not Applicable	0	0	Not Available	NA	TCGA-AA-3662-D37403	7ABB665F-CA40-4858-A7EB-4D5B975E83F4	Not Available	3	184	62	Capecitabine	Partial Response	12	Not Available	Not Available	Not Available	Not Available	Not Applicable	Not Available	Not Available	NO	Chemotherapy	Not Available	Not Available	Not Available	NO	2012	Not Available	NA
TCGA-G4-6625	2792	0	T3	N0	M0	Stage IIA	NA			77	Sigmoid Colon	TCGA-G4-6625	5eed7e8a-c219-4497-a99f-bfc48faca4d8	NO	Not Available	Not Available	YES	14	-28163	Not Applicable	0	2673	Not Available	NA																								NOT HISPANIC OR LATINO	NA
TCGA-NH-A6GA	302	1	T4a	N2a	MX	Stage IIIC	NA			58	Ascending Colon	TCGA-NH-A6GA	51DCBFAC-6F04-4364-877D-0BF1BD566335	NO	Not Available	50	NO	10	-21313	Not Applicable	0	182	Not Available	NA	TCGA-NH-A6GA-D48254;TCGA-NH-A6GA-D48255;TCGA-NH-A6GA-D50201;TCGA-NH-A6GA-D50202;TCGA-NH-A6GA-D58979;TCGA-NH-A6GA-D58980;TCGA-NH-A6GA-D58981;TCGA-NH-A6GA-D58982	5EADFF6A-01B3-4724-8D7F-B59A13338091;A41B6E53-6845-4700-8105-90A0A05F439F;BEFD528B-A161-4395-A63C-4F97439D0540;D27B898F-FB23-4CBA-9769-24BAF44B08C2;0544F341-FD79-42FB-9733-CD6D396CC274;38DFFC3E-A27E-4F6B-BE5E-EBE2884CCC62;BB7CA757-40E5-485F-B40D-261FA200138F;74ED3264-9A64-47E0-8F75-79C3CC3E61DC	Not Available;Not Available;Not Available;Not Available;Not Available;Not Available;Not Available;Not Available	10;14;17;17;29;29;29;29	135;302;135;302;302;302;135;135	61;192;61;192;192;192;61;61	oxaliplatin;avastin;avastin;leucovorin;5-FU;irinotecan;leucovorin;fluorouracil	Clinical Progressive Disease;Clinical Progressive Disease;Unknown;Clinical Progressive Disease;Clinical Progressive Disease;Clinical Progressive Disease;Clinical Progressive Disease;Clinical Progressive Disease	9;9;10;10;4;4;4;4	Not Available;Not Available;Not Available;Not Available;Not Available;Not Available;Not Available;Not Available	Not Available;Not Available;Not Available;Not Available;Not Available;Not Available;Not Available;Not Available	Not Available;Not Available;Not Available;Not Available;Not Available;Not Available;Not Available;Not Available	Not Available;Not Available;Not Available;Not Available;Not Available;Not Available;Not Available;Not Available	Not Applicable;Not Applicable;Not Applicable;Not Applicable;Not Applicable;Not Applicable;Not Applicable;Not Applicable	Not Available;Not Available;Not Available;Not Available;Not Available;Not Available;Not Available;Not Available	Not Available;Not Available;Not Available;Not Available;Not Available;Not Available;Not Available;Not Available	NO;NO;NO;NO;NO;NO;NO;NO	Chemotherapy;Chemotherapy;Chemotherapy;Ancillary;Chemotherapy;Chemotherapy;Ancillary;Chemotherapy	Not Available;Not Available;Not Available;Not Available;Not Available;Not Available;Not Available;Not Available	Not Available;Not Available;Not Available;Not Available;Not Available;Not Available;Not Available;Not Available	Not Available;Not Available;Not Available;Not Available;Not Available;Not Available;Not Available;Not Available	NO;NO;NO;NO;NO;NO;NO;NO	2013;2013;2013;2013;2014;2014;2014;2014	NOT HISPANIC OR LATINO	NA
TCGA-CM-6165	488	0	T3	N0	M0	Stage IIA	NA			74	Sigmoid Colon	TCGA-CM-6165	f4e047a5-bdb2-4bc2-aff0-e0f45bcc9062	NO	Not Available	Not Available	NO	19	-27302	Not Applicable	0	212	Not Available	NA																								NOT HISPANIC OR LATINO	NA
TCGA-G4-6586	1089	0	T3	N0	M0	Stage IIA	NA			73	Ascending Colon	TCGA-G4-6586	7570761b-c333-40df-ac8c-9b7f94c58ef9	NO	Not Available	Not Available	NO	14	-27020	Not Applicable	0	741	Not Available	NA																								NOT HISPANIC OR LATINO	NA
TCGA-QL-A97D	666	0	T2	N0	MX	Stage I	NA			84	Cecum	TCGA-QL-A97D	D5A1F43E-25A7-47F5-B63E-43714F9F732A	Not Available	Not Available	Not Available	Not Available	20	-30914	Not Applicable	0	295	Not Available	NA																								Not Evaluated	NA
TCGA-DM-A28K	2988	0	T3	N0	M0	Stage IIA	NA			75	Hepatic Flexure	TCGA-DM-A28K	3E1886A8-2ED2-41EE-8B58-10F5321ADE6F	NO	Not Available	Not Available	Not Available	27	-27428	Not Applicable	0	2835	Not Available	NA																								NOT HISPANIC OR LATINO	NA
TCGA-CA-5256	379	0	T3	N0	M0	Stage IIA	NA			54	Hepatic Flexure	TCGA-CA-5256	17633a60-e12b-4a7c-bd8a-c16341ddc606	NO	Not Available	Not Available	Not Available	5	-19785	Not Applicable	0	0	Not Available	NA	TCGA-CA-5256-D70889;TCGA-CA-5256-D70890;TCGA-CA-5256-D70891	528CCCB5-6DF2-456B-BDF6-1CE1FB302BA5;25467727-76C8-4DBE-BB26-2F51C287E804;A8E9F2B5-BB30-43C6-81DA-577AEFBC529C	Not Available;Not Available;Not Available	10;10;10	206;206;206	20;20;20	oxaliplatin;5-Fluorouracil;Folinic Acid	Complete Response;Complete Response;Complete Response	3;3;3	Not Available;Not Available;Not Available	Not Available;Not Available;Not Available	Not Available;Not Available;Not Available	Not Available;Not Available;Not Available	Not Applicable;Not Applicable;Not Applicable	Not Available;Not Available;Not Available	Not Available;Not Available;Not Available	NO;NO;NO	Chemotherapy;Chemotherapy;Chemotherapy	Not Available;Not Available;Not Available	Not Available;Not Available;Not Available	Not Available;Not Available;Not Available	NO;NO;NO	2015;2015;2015	Not Available	NA
TCGA-F4-6855	1442	0	T3	N0	M0	Stage IIA	NA			70	Sigmoid Colon	TCGA-F4-6855	1c111912-c664-42f5-9802-065b1994a2f4	Not Available	Not Available	Not Available	NO	7	-25890	Not Applicable	0	42	Not Available	NA																								NOT HISPANIC OR LATINO	NA
TCGA-DM-A28E	3648	0	T3	N0	M0	Stage IIA	NA			72	Sigmoid Colon	TCGA-DM-A28E	85BDC1AC-A1A4-46C2-BC2D-E5FABF5C89E9	YES	Normal	Not Available	YES	2	-26602	Not Applicable	0	3530	Not Available	NA																								NOT HISPANIC OR LATINO	NA
TCGA-G4-6299	2268	0	T3	N2	M0	Stage IIIC	NA			69	Descending Colon	TCGA-G4-6299	23252dca-e836-47a0-b294-758ad60aa259	NO	Not Available	Not Available	NO	1	-25318	Not Applicable	0	2077	Not Available	NA	TCGA-G4-6299-D22030;TCGA-G4-6299-D22032;TCGA-G4-6299-D22033;TCGA-G4-6299-D22029	7c7ee768-9568-4ec4-9026-3ce737ed05dc;cdfa4fa2-4682-4fc8-883a-185c52a8986d;3a112e40-6f15-46f9-a153-7cf96e71c8f4;f7f479e8-c97f-4318-841c-4093a7451dfc	Not Available;Not Available;Not Available;Not Available	20;20;20;20	192;192;192;363	38;38;38;38	Leucovorin;Oxaliplatin;Fluorouracil;Bevacizumab	Not Available;Not Available;Not Available;Not Available	1;1;1;1	12;12;12;24	Not Available;Not Available;Not Available;5	Not Available;Not Available;Not Available;mg/kg	ADJUVANT;ADJUVANT;ADJUVANT;ADJUVANT	Not Applicable;Not Applicable;Not Applicable;Not Applicable	1;1;1;1	IV;IV;IV;IV	NO;NO;NO;NO	Other, specify in notes;Other, specify in notes;Other, specify in notes;Other, specify in notes	Phase III Clinical Trial;Phase III Clinical Trial;Phase III Clinical Trial;Phase III Clinical Trial	Not Available;Not Available;Not Available;120	Not Available;Not Available;Not Available;mg/kg	Not Available;Not Available;Not Available;Not Available	2012;2012;2012;2012	NOT HISPANIC OR LATINO	NA
TCGA-F4-6809	403	1	T3	N1	M1	Stage IVA	NA			52	Sigmoid Colon	TCGA-F4-6809	e7af286b-3dec-4cf2-8fbd-fa64b3efdf7f	NO	Not Available	Not Available	NO	25	-19039	Not Applicable	0	39	Not Available	NA																								NOT HISPANIC OR LATINO	NA
TCGA-AD-A5EJ	0	0	T3	N0	MX	Stage IIA	NA			74	Cecum	TCGA-AD-A5EJ	613AA3E8-A70B-45A9-9C08-0C2346C8BF00	Unknown	Not Available	1	YES	12	-27180	Not Applicable	0	0	Not Available	NA																								NOT HISPANIC OR LATINO	NA
TCGA-DM-A0XD	743	1	T3	N0	M0	Stage IIA	NA			65	Discrepancy	TCGA-DM-A0XD	a56f6562-d2af-47b9-bf81-94b3b4893173	YES	Normal	Not Available	YES	15	-23966	743	0	Not Available	Not Available	NA																								NOT HISPANIC OR LATINO	NA
TCGA-CK-4948	4502	0	T3	N1	M0	Stage III	NA			45	Sigmoid Colon	TCGA-CK-4948	5d73b382-3da3-4220-890e-2095228bbe6c	NO	Not Available	1	NO	30	-16736	Not Applicable	0	3116	Not Available	NA																								NOT HISPANIC OR LATINO	NA
TCGA-D5-6529	614	0	T3	N0	M0	Stage IIA	NA			69	Discrepancy	TCGA-D5-6529	9c34830b-4d7f-4b41-9659-fbfc36c145c9	NO	Not Available	50	NO	9	-25394	Not Applicable	0	260	Not Available	NA	TCGA-D5-6529-D28929	8f6e7fb1-f1f1-4c84-a677-d71f8713a584	Not Available	2	Not Available	502	oxaliplatinum+ 5-FU	Not Available	3	9	Not Available	Not Available	PROGRESSION	Not Applicable	Not Available	IV	YES	Chemotherapy	Not Available	1530+36000	mg	Not Available	2012	NOT HISPANIC OR LATINO	NA
TCGA-DM-A0XF	1162	1	T3	N2	M0	Stage IIIC	NA			68	Discrepancy	TCGA-DM-A0XF	b823d6e5-54b0-43d3-95e2-9be33dc6f734	NO	Not Available	Not Available	Not Available	15	-25032	1162	0	Not Available	Not Available	NA	TCGA-DM-A0XF-D30352;TCGA-DM-A0XF-D30353	85F76F5C-1C87-421C-AE2C-9346148FFA56;5A51E617-F6C8-4325-A8B3-8355D2A9C937	Not Available;Not Available	10;12	174;Not Available	45;201	Mayo 425-20;FOLFIRI	Complete Response;Unknown	4;4	Not Available;Not Available	Not Available;Not Available	Not Available;Not Available	Not Available;Not Available	Not Applicable;Not Applicable	Not Available;Not Available	Not Available;Not Available	NO;NO	Chemotherapy;Chemotherapy	Not Available;Not Available	Not Available;Not Available	Not Available;Not Available	NO;NO	2012;2012	NOT HISPANIC OR LATINO	NA
TCGA-4T-AA8H	385	0	T3	N0	MX	Stage IIA	NA			42	Descending Colon	TCGA-4T-AA8H	A5E14ADD-1552-4606-9FFE-3A03BCF76640	NO	Not Available	20	NO	5	-15494	Not Applicable	0	160	Not Available	NA																								NOT HISPANIC OR LATINO	NA
TCGA-A6-5665	671	0	T3	N0	M0	Stage IIA	NA			84	Ascending Colon	TCGA-A6-5665	4c6c8d3d-e4a3-490a-9211-cfbe7e6ee25b	YES	Abnormal	Not Available	YES	20	-30915	Not Applicable	0	286	Not Available	NA																								NOT HISPANIC OR LATINO	NA
TCGA-NH-A5IV	0	0	T3	N0	MX	Stage IIA	NA			90	Transverse Colon	TCGA-NH-A5IV	CC22913D-2DDA-48BB-82AA-9960B73F3E44	NO	Not Available	30	NO	13	-32872	Not Applicable	0	0	Not Available	NA																								NOT HISPANIC OR LATINO	NA
TCGA-3L-AA1B	475	0	T2	N0	M0	Stage I	NA			61	Cecum	TCGA-3L-AA1B	A94E1279-A975-480A-93E9-7B1FF05CBCBF	NO	Not Available	Not Available	YES	22	-22379	Not Applicable	0	154	Not Available	NA																								NOT HISPANIC OR LATINO	NA
TCGA-D5-6898	229	0	T2	N0	M0	Stage I	NA			51	Sigmoid Colon	TCGA-D5-6898	27e2438d-bd01-4c50-9102-563276ed9922	NO	Not Available	23	NO	18	-18874	Not Applicable	0	45	Not Available	NA																								NOT HISPANIC OR LATINO	NA
TCGA-AA-3502	1065	0	T2	N0	M0	Stage I	NA			73	Transverse Colon	TCGA-AA-3502	8368d745-c74d-4236-ba75-16ca7aaeb3ca	NO	Not Available	Not Available	Not Available	18	-26724	Not Applicable	0	31	Not Available	NA																								Not Available	NA
TCGA-D5-6533	775	0	T4b	N0	M0		NA			68	Transverse Colon	TCGA-D5-6533	fa83dfb5-7386-4a35-9861-aa866478d5f1	NO	Not Available	0	NO	15	-24971	Not Applicable	0	40	Not Available	NA	TCGA-D5-6533-D34457	752BD87B-FBD0-4A45-AA82-C60FF3B4B3F3	Not Available	15	195	67	Oxaliplatin, Folinic acid, Fluorouracil	Complete Response	8	Not Available	Not Available	Not Available	Not Available	Not Applicable	Not Available	Not Available	NO	Chemotherapy	Not Available	Not Available	Not Available	NO	2012	NOT HISPANIC OR LATINO	NA
TCGA-DM-A28H	3561	0	T3	N2	M0	Stage IIIC	NA			50	Cecum	TCGA-DM-A28H	AEC0C661-AFAC-4F7A-8C31-154D743F2499	YES	Normal	Not Available	Not Available	27	-18325	Not Applicable	0	3423	Not Available	NA																								NOT HISPANIC OR LATINO	NA
TCGA-CM-5868	518	0	T4a	N1a	M1a	Stage IVA	NA			59	Sigmoid Colon	TCGA-CM-5868	4aadf2a2-ce1e-4f94-b146-59292e83e7fd	YES	Normal	Not Available	NO	18	-21672	Not Applicable	0	304	Not Available	NA	TCGA-CM-5868-D15265;TCGA-CM-5868-D15270;TCGA-CM-5868-D15266;TCGA-CM-5868-D15267;TCGA-CM-5868-D15269;TCGA-CM-5868-D15268	231ad9ed-6fbf-41e0-b7f6-f37b39bfe7c6;e1b8376b-e4a5-40b0-aa12-f2f19ef1d26a;91d3a944-24bc-4e79-9a0b-bcd64ee991b2;1071fb4b-8369-4469-8f2b-3263a3bd1f05;45dc93fc-8988-4181-bd98-c69db74aef7a;4f3182e8-b6a8-4457-b4c7-719105d866d1	Not Available;Not Available;Not Available;Not Available;Not Available;Not Available	15;15;15;15;15;15	Not Available;Not Available;Not Available;Not Available;Not Available;Not Available	31;316;45;45;316;78	Floxuridine;Fluorouracil;Oxaliplatin;Irinotecan HCl;Leucovorin;Dexamethasone	Not Available;Not Available;Not Available;Not Available;Not Available;Not Available	8;8;8;8;8;8	9;2;9;20;2;2	290;2200;180;260;850;25	mg;mg;mg;mg;mg;mg	ADJUVANT;ADJUVANT;ADJUVANT;ADJUVANT;ADJUVANT;ADJUVANT	Not Applicable;Not Applicable;Not Applicable;Not Applicable;Not Applicable;Not Applicable	1;1;1;1;1;1	IV;IV;IV;IV;IV;IV	YES;YES;YES;YES;YES;YES	Chemotherapy;Chemotherapy;Chemotherapy;Chemotherapy;Other, specify in notes;Other, specify in notes	Not Available;Not Available;Not Available;Not Available;Ancillary agent;Ancillary agent	1084;4400;1100;4160;1700;40	mg;mg;mg;mg;mg;mg	Not Available;Not Available;Not Available;Not Available;Not Available;Not Available	2011;2011;2011;2011;2011;2011	NOT HISPANIC OR LATINO	NA
TCGA-A6-5667	887	0	T3	N1a	MX	Stage IIIB	NA			40	Sigmoid Colon	TCGA-A6-5667	28d03569-8717-40da-8989-70baf2b18f9f	NO	Not Available	Not Available	NO	27	-14756	Not Applicable	0	320	Not Available	NA	TCGA-A6-5667-D13423;TCGA-A6-5667-D13426;TCGA-A6-5667-D13424;TCGA-A6-5667-D13429	db0386f8-b893-4fa3-bd66-33eac054e066;b3dc8aab-d46f-4239-b2fa-2050e3721e71;1f9e7cb8-aa9f-439d-b187-ba5f32ace987;70fb07b7-8554-46f0-b865-ad8979c5ddba	Not Available;Not Available;Not Available;Not Available	27;27;27;27	160;223;223;225	62;62;62;62	Oxaliplatin;Leucovorin;5 FU;5FU	Not Available;Not Available;Not Available;Not Available	6;6;6;6	8;12;12;12	100-158;50-125;662-744;3974-4464	mg;mg;mg;mg	ADJUVANT;ADJUVANT;ADJUVANT;ADJUVANT	Not Applicable;Not Applicable;Not Applicable;Not Applicable	1;1;1;1	IV;IV;IV;IV	NO;NO;NO;NO	Chemotherapy;Other, specify in notes;Chemotherapy;Chemotherapy	Not Available;Ancillary;Not Available;Not Available	1026;925;8674;52044	mg;mg;mg;mg	Not Available;Not Available;Not Available;Not Available	2011;2011;2011;2011	NOT HISPANIC OR LATINO	NA
TCGA-AD-6888	472	1	T3	N1b	M0	Stage IIIB	NA			73	Hepatic Flexure	TCGA-AD-6888	13eff2e5-e33a-485f-9ba4-8a7ccb3c7528	NO	Not Available	90	YES	22	-26816	Not Applicable	0	155	Not Available	NA																								NOT HISPANIC OR LATINO	NA
TCGA-A6-2677	740	1	T3	N2	M0	Stage IIIC	NA	FPPP	TCGA	68	Cecum	TCGA-A6-2677	d976782c-90c1-421d-b83c-7fc2617e2709	NO	Not Available	Not Available	NO	21	-25143	Not Applicable	0	541	Not Available	NA	TCGA-A6-2677-D2516;TCGA-A6-2677-D2514;TCGA-A6-2677-D2518;TCGA-A6-2677-D2510	8bcbb764-ba22-4dca-98cb-b56141536845;fc790e21-4b95-4088-b256-6f1f47d9e46f;f63c40b8-a6dc-4a65-b2ed-e7b458fd120a;07c7b730-6602-4b6b-bb72-99d5b986f227	Not Available;Not Available;Not Available;Not Available	21;21;21;21	617;617;252;252	112;112;112;112	Leucovorin;5- FU;5-FU;Oxaliplatin	Not Available;Not Available;Not Available;Not Available	10;10;10;10	9;9;9;9	600;592-620;3552-3720;66-150	mg;mg;mg;mg	ADJUVANT;ADJUVANT;ADJUVANT;ADJUVANT	Not Applicable;Not Applicable;Not Applicable;Not Applicable	1;1;1;1	IV;IV;IV;IV	NO;NO;NO;NO	Other, specify in notes;Chemotherapy;Chemotherapy;Chemotherapy	Ancillary;Not Available;Not Available;Not Available	5400;5504;33,024;976	mg;mg;mg;mg	Not Available;Not Available;Not Available;Not Available	2010;2010;2010;2010	NOT HISPANIC OR LATINO	NA
TCGA-DM-A28G	1849	1	T3	N0	M0	Stage IIA	NA			75	Ascending Colon	TCGA-DM-A28G	FFA7E03A-4A3C-41F0-937A-4FB862FD2194	YES	Normal	Not Available	YES	27	-27641	1849	0	1849	Not Available	NA																								NOT HISPANIC OR LATINO	NA
TCGA-DM-A1D7	NA		T3	N0	M0	Stage IIA	NA			82	Sigmoid Colon	TCGA-DM-A1D7	fac2c617-8149-45bb-b766-fbe13dc3c425	YES	Normal	Not Available	Not Available	Not Available	-30142	Not Applicable	0	Not Available	0	NA																								NOT HISPANIC OR LATINO	NA
TCGA-AA-3655	1856	0	T3	N0	M0	Stage II	NA			68	Sigmoid Colon	TCGA-AA-3655	31a3877d-3e82-450e-811f-3448b06f3950	NO	Not Available	Not Available	Not Available	18	-24896	Not Applicable	0	0	Not Available	NA																								Not Available	NA
TCGA-AZ-6600	368	1	T4	N1	M1	Stage IV	NA			64	Hepatic Flexure	TCGA-AZ-6600	aee20b98-df51-4ead-86cc-0d5f60a74b90	Not Available	Not Available	Not Available	Not Available	30	-23581	368	0	Not Available	Not Available	NA	TCGA-AZ-6600-D34149;TCGA-AZ-6600-D34150;TCGA-AZ-6600-D34151	B95F4311-53FF-4CA7-975C-9F2B508C6EA8;BC76525A-EFC5-4518-8284-ED321B464F5E;D03EF7A0-DCCB-4070-9D2D-89B401069535	Not Available;Not Available;Not Available	31;31;31	144;144;144	122;122;122	CPT-11;5-FU;Leucovorin	Clinical Progressive Disease;Clinical Progressive Disease;Clinical Progressive Disease	7;7;7	Not Available;Not Available;Not Available	Not Available;Not Available;Not Available	Not Available;Not Available;Not Available	Not Available;Not Available;Not Available	Not Applicable;Not Applicable;Not Applicable	Not Available;Not Available;Not Available	Not Available;Not Available;Not Available	NO;NO;NO	Chemotherapy;Chemotherapy;Chemotherapy	Not Available;Not Available;Not Available	Not Available;Not Available;Not Available	Not Available;Not Available;Not Available	NO;NO;NO	2012;2012;2012	NOT HISPANIC OR LATINO	NA
TCGA-A6-6142	763	0	T3	N1a	M1a	Stage IVA	NA			56	Sigmoid Colon	TCGA-A6-6142	c7c5348f-5708-45bf-b40e-1bf7c9348f60	NO	Not Available	Not Available	NO	21	-20485	Not Applicable	0	134	Not Available	NA	TCGA-A6-6142-D28730;TCGA-A6-6142-D28729;TCGA-A6-6142-D28726;TCGA-A6-6142-D28727	16ab0b29-4834-4c89-aac1-63c46bbc2872;50512b15-54bb-4a84-b660-746ec73824f5;e3ae1ca9-0fc8-416c-b5b0-5b3bbebdb77b;698bfec7-fb37-43b9-aa00-8567f13f8a4a	Not Available;Not Available;Not Available;Not Available	26;28;28;28	340;338;338;338	142;142;142;142	Fluorouracil;Fluorouracil;Oxaliplatin;Leucovorin	Not Available;Not Available;Not Available;Not Available	2;2;2;2	12;12;12;12	2850-4512;494-752;95-150;50-752	mg;mg;mg;mg	ADJUVANT;ADJUVANT;ADJUVANT;ADJUVANT	Not Applicable;Not Applicable;Not Applicable;Not Applicable	1;1;1;1	IV;IV;IV;IV	NO;NO;NO;NO	Chemotherapy;Chemotherapy;Chemotherapy;Other, specify in notes	Not Available;Not Available;Not Available;Ancillary	44695;7545;1501;5048	mg;mg;mg;mg	Not Available;Not Available;Not Available;Not Available	2012;2012;2012;2012	NOT HISPANIC OR LATINO	NA
TCGA-AM-5820	14	0	T4a	N2	M1	Stage IVA	NA			59	Sigmoid Colon	TCGA-AM-5820	26a12266-c6d8-42f9-bd4e-5093d827ac9a	NO	Not Available	Not Available	NO	15	-21902	Not Applicable	0	14	Not Available	NA																								NOT HISPANIC OR LATINO	NA
TCGA-F4-6463	1087	0	T3	N0	M0	Stage IIA	NA			51	Transverse Colon	TCGA-F4-6463	cbe23011-93b7-4e9f-b934-bd0122f91f54	NO	Not Available	Not Available	Not Available	20	-18804	Not Applicable	0	0	Not Available	NA																								NOT HISPANIC OR LATINO	NA
TCGA-DM-A28F	1094	1	T3	N1	M0	Stage IIIB	NA			73	Sigmoid Colon	TCGA-DM-A28F	022F39E9-57EE-4B2B-8B3A-8929E3D69A37	YES	Normal	Not Available	YES	27	-26856	1094	0	1094	Not Available	NA																								NOT HISPANIC OR LATINO	NA
TCGA-A6-A5ZU	293	0	T3	N1	M0	Stage IIIB	NA			59	Transverse Colon	TCGA-A6-A5ZU	4881A390-C4E4-48B4-AE66-140C64A87614	NO	Not Available	Not Available	NO	15	-21554	Not Applicable	0	117	Not Available	NA	TCGA-A6-A5ZU-D51210;TCGA-A6-A5ZU-D51211;TCGA-A6-A5ZU-D51212;TCGA-A6-A5ZU-D51213	0A3C8862-F409-415A-AA9C-4FAF2B00D046;B0A001F1-04BE-42CE-827C-E68CCC501CA3;16A5338C-26CA-4F43-A103-F39855600088;8049EF92-87B1-4195-A843-E594E482D74A	Not Available;Not Available;Not Available;Not Available	13;13;13;13	245;272;272;274	105;105;105;105	Oxaliplatin;Leucovorin;Fluorouracil;Fluorouracil	Complete Response;Complete Response;Complete Response;Complete Response	11;11;11;11	Not Available;Not Available;Not Available;Not Available	Not Available;Not Available;Not Available;Not Available	Not Available;Not Available;Not Available;Not Available	Not Available;Not Available;Not Available;Not Available	Not Applicable;Not Applicable;Not Applicable;Not Applicable	Not Available;Not Available;Not Available;Not Available	Not Available;Not Available;Not Available;Not Available	NO;NO;NO;NO	Chemotherapy;Ancillary;Chemotherapy;Chemotherapy	Not Available;Not Available;Not Available;Not Available	Not Available;Not Available;Not Available;Not Available	Not Available;Not Available;Not Available;Not Available	NO;NO;NO;NO	2013;2013;2013;2013	NOT HISPANIC OR LATINO	NA
TCGA-A6-5657	962	0	T3	N1	M0	Stage IIIB	NA			65	Discrepancy	TCGA-A6-5657	dbbee8f5-d83d-4195-85cf-f89d327da0a9	NO	Not Available	Not Available	NO	31	-23920	Not Applicable	0	367	Not Available	NA	TCGA-A6-5657-D12386;TCGA-A6-5657-D12385;TCGA-A6-5657-D12384	5c18e079-5a69-4390-b00f-e806fc54ad99;06252ba3-ef9d-4962-b9fe-71a2a400610b;acfd75b3-5851-4076-9e2d-847babf77bf1	Not Available;Not Available;Not Available	31;31;31	54;54;54	40;40;40	Leucovorin;5 FU;Oxaliplatin	Not Available;Not Available;Not Available	5;5;5	1;1;1	1000-1050;1000-1055;178-179	mg;mg;mg	ADJUVANT;ADJUVANT;ADJUVANT	Not Applicable;Not Applicable;Not Applicable	1;1;1	IV;IV;IV	NO;NO;NO	Other, specify in notes;Chemotherapy;Chemotherapy	Leucovorin;Not Available;Not Available	3050;3055;357	mg;mg;mg	Not Available;Not Available;Not Available	2011;2011;2011	NOT HISPANIC OR LATINO	NA
TCGA-G4-6306	1359	0	T2	N0	M0		NA			71	Ascending Colon	TCGA-G4-6306	303286c2-bc58-4bbb-9171-74cdb1d7f62f	NO	Not Available	15	NO	12	-26163	Not Applicable	0	1359	Not Available	NA																								NOT HISPANIC OR LATINO	NA
TCGA-DM-A1D6	570	1	T3	N0	M0	Stage IIA	NA			88	Splenic Flexure	TCGA-DM-A1D6	eb191e71-4b6e-4c8d-8348-519be5a1e657	YES	Normal	Not Available	Not Available	Not Available	-32302	570	0	570	570	NA																								NOT HISPANIC OR LATINO	NA
TCGA-A6-2679	1366	0	T3	N0		Stage IIB	NA			73	Ascending Colon	TCGA-A6-2679	0f74d992-00da-4728-9564-086ca1b95921	NO	Not Available	Not Available	NO	14	-26820	Not Applicable	0	595	Not Available	NA																								NOT HISPANIC OR LATINO	NA
TCGA-CM-6676	337	0	T2	N0	M0	Stage I	NA			82	Sigmoid Colon	TCGA-CM-6676	4138aca8-e085-45fb-b353-74852efe61bf	NO	Not Available	Not Available	NO	26	-30223	Not Applicable	0	153	Not Available	NA																								NOT HISPANIC OR LATINO	NA
TCGA-AZ-5403	1910	1	T3	N0	MX	Stage II	NA			43	Sigmoid Colon	TCGA-AZ-5403	85a57cfe-f1c9-44d9-8b50-022c0d3438d1	Not Available	Not Available	65	Not Available	26	-15983	1910	0	Not Available	Not Available	NA																								NOT HISPANIC OR LATINO	NA
TCGA-AA-3488	153	1	T3	N2	M1	Stage IV	NA			58	Sigmoid Colon	TCGA-AA-3488	6e9e0c2f-2ddb-40f1-8e8c-618119e62ec1	NO	Not Available	Not Available	Not Available	18	-21519	153	0	Not Available	Not Available	NA																								Not Available	NA
TCGA-G4-6626	1	1	T3	N0	M0	Stage IIA	NA			90	Ascending Colon	TCGA-G4-6626	3aae5316-6a5d-4b83-9020-ad691d4edf99	Not Available	Not Available	Not Available	NO	1	-32871	1	0	Not Available	Not Available	NA																								NOT HISPANIC OR LATINO	NA
TCGA-CA-5797	383	0	T3	N0	M0	Stage IIA	NA			56	Sigmoid Colon	TCGA-CA-5797	3e0c34cb-fca5-4bcf-a5c1-5a7d286dd072	Not Available	Not Available	Not Available	Not Available	2	-20662	Not Applicable	0	8	Not Available	NA																								NOT HISPANIC OR LATINO	NA
TCGA-D5-6929	408	0	T3	N1	M1	Stage IV	NA			49	Sigmoid Colon	TCGA-D5-6929	64b0461f-038d-4712-948e-818dc2f10eef	NO	Not Available	Not Available	NO	21	-17919	Not Applicable	0	146	Not Available	NA	TCGA-D5-6929-D29898	5EED9D54-58D8-44C3-ADFA-E95A41C3B1D7	Not Available	30	216	48	oxaliplatinum+5 fluorouracilum	Not Available	3	7+12	158.1+3720	mg/m2	ADJUVANT	Not Applicable	Not Available	IV	NO	Chemotherapy	Not Available	1106.7+44640	mg	Not Available	2012	NOT HISPANIC OR LATINO	NA
TCGA-G4-6307	1674	0	T3	N1	M0	Stage IIIB	NA			37	Sigmoid Colon	TCGA-G4-6307	568dbda7-88b5-4330-881f-dc5d6c7ce4ae	NO	Not Available	Not Available	YES	13	-13648	Not Applicable	0	1485	Not Available	NA	TCGA-G4-6307-D21941;TCGA-G4-6307-D21942;TCGA-G4-6307-D21943	bcf0997e-092d-4457-9be6-90cb82e51bd4;716a76ab-cae0-4593-820b-39fdc2d598d4;14d134ef-0304-4361-99b3-d74891f94c8a	Not Available;Not Available;Not Available	25;25;25	229;187;229	47;47;47	Fluorouracil;Oxaliplatin;Leucovorin	Not Available;Not Available;Not Available	1;1;1	12;8;12	720;153;720	mg;mg;mg	ADJUVANT;ADJUVANT;ADJUVANT	Not Applicable;Not Applicable;Not Applicable	1;1;1	IV;IV;IV	NO;NO;NO	Chemotherapy;Chemotherapy;Chemotherapy	Not Available;Not Available;Not Available	8640;1056;8640	mg;mg;mg	Not Available;Not Available;Not Available	2012;2012;2012	NOT HISPANIC OR LATINO	NA
TCGA-AZ-4315	1776	0	T3	N0	M0	Stage IIA	NA			61	Cecum	TCGA-AZ-4315	de287a25-981d-49f8-81af-fe0300e4cd31	Not Available	Not Available	5	Not Available	21	-22340	Not Applicable	0	1334	Not Available	NA																								NOT HISPANIC OR LATINO	NA
TCGA-AZ-4614	172	1	T4a	N1	M1	Stage IVA	NA			71	Not Available	TCGA-AZ-4614	3334201d-a3c0-45ec-a9ed-cf48cc8c38e8	Not Available	Not Available	Not Available	Not Available	21	-26267	172	0	Not Available	Not Available	NA																								NOT HISPANIC OR LATINO	NA
TCGA-AY-A69D	543	0	T3	N0	M0	Stage IIA	NA			55	Transverse Colon	TCGA-AY-A69D	ACD51808-870C-4684-A2DE-AA0B058729E1	NO	Not Available	Not Available	NO	18	-20299	Not Applicable	0	168	Not Available	NA																								NOT HISPANIC OR LATINO	NA
TCGA-A6-5656	1001	0	T2	N0	M0	Stage I	NA	FPPP	TCGA	74	Sigmoid Colon	TCGA-A6-5656	eb4e4e09-98b3-4e85-8dd2-75676ff2af14	NO	Not Available	Not Available	NO	15	-27184	Not Applicable	0	462	Not Available	NA																								NOT HISPANIC OR LATINO	NA
TCGA-A6-5659	926	0	T2	N0	M0	Stage I	NA	FPPP	TCGA	82	Cecum	TCGA-A6-5659	98d45099-feae-4dad-aa38-ec03fed6d999	NO	Not Available	Not Available	YES	26	-30028	Not Applicable	0	286	Not Available	NA																								NOT HISPANIC OR LATINO	NA
TCGA-CM-5861	457	0	T3	N0	M0	Stage IIA	NA			63	Cecum	TCGA-CM-5861	9743d31a-ea8f-4847-87d2-ebf77cc5983d	Not Available	Not Available	Not Available	NO	18	-23253	Not Applicable	0	335	Not Available	NA																								NOT HISPANIC OR LATINO	NA
TCGA-AZ-4684	1977	0	T3	N2	M1	Stage IVA	NA			49	Not Available	TCGA-AZ-4684	cac80259-3a26-4a99-b0d3-13454068e6ed	Not Available	Not Available	34	Not Available	23	-18252	Not Applicable	0	1705	Not Available	NA	TCGA-AZ-4684-D30846	2bb28cde-e6d2-4b5b-be40-2e267a44ce8b	Not Available	25	Not Available	22	Folfox	Clinical Progressive Disease	4	Not Available	Not Available	Not Available	Not Available	Not Applicable	Not Available	Not Available	NO	Chemotherapy	Not Available	Not Available	Not Available	NO	2012	NOT HISPANIC OR LATINO	NA
TCGA-CM-6678	335	0	T4a	N1c	M1a	Stage IVA	NA			63	Sigmoid Colon	TCGA-CM-6678	d7048098-09b3-4763-ad54-9c5c6fe14bc0	YES	Normal	Not Available	NO	Not Available	-23070	Not Applicable	0	122	Not Available	NA	TCGA-CM-6678-D30951;TCGA-CM-6678-D30953;TCGA-CM-6678-D17051;TCGA-CM-6678-D17050;TCGA-CM-6678-D17049	e903ec03-d66a-4f5b-87a8-e1e78e0e79e6;fbd5870c-73a8-401f-a792-4a7aeda61922;f1e0900b-3a55-4d01-b8ed-d23892afb723;0452e18b-530a-40c8-bd25-d973c1784af8;01518ad8-5c28-40d7-8e5f-2d15a4df5355	Not Available;Not Available;Not Available;Not Available;Not Available	19;19;19;19;19	275;306;214;91;214	275;275;17;30;0	Floxuridine;IRINOtecan HCl;Irinotecan HCL;Oxaliplatin;Floxuridine	Unknown;Unknown;Not Available;Not Available;Not Available	4;4;4;4;4	Not Available;Not Available;12;7;7	Not Available;Not Available;200;130;170	Not Available;Not Available;mg;mg;mg	Not Available;Not Available;ADJUVANT;ADJUVANT;ADJUVANT	Not Applicable;Not Applicable;Not Applicable;Not Applicable;Not Applicable	Not Available;Not Available;1;1;1	Not Available;Not Available;IV;IV;IH	NO;NO;NO;NO;NO	Chemotherapy;Chemotherapy;Chemotherapy;Chemotherapy;Chemotherapy	Not Available;Not Available;Not Available;Not Available;Not Available	Not Available;Not Available;2040;770;475	Not Available;Not Available;mg;mg;mg	NO;NO;Not Available;Not Available;Not Available	2012;2012;2012;2012;2012	NOT HISPANIC OR LATINO	NA
TCGA-F4-6805	1047	0	T3	N0	M0	Stage IIA	NA			58	Descending Colon	TCGA-F4-6805	e76258b7-e13a-4b05-855b-d792701ffba1	NO	Not Available	Not Available	NO	25	-21241	Not Applicable	0	16	Not Available	NA	TCGA-F4-6805-D35065	8EEA3753-54B7-4A29-9F52-588A974F7AA9	Not Available	14	111	29	Xeloda	Complete Response	9	Not Available	Not Available	Not Available	Not Available	Not Applicable	Not Available	Not Available	NO	Chemotherapy	Not Available	Not Available	Not Available	NO	2012	NOT HISPANIC OR LATINO	NA
TCGA-CK-4950	2599	0	T3	N1	M0	Stage IIIB	NA			68	Cecum	TCGA-CK-4950	c293a148-a88c-4fb3-b2f4-e64e918044f9	NO	Not Available	25	NO	1	-24944	Not Applicable	0	1227	Not Available	NA	TCGA-CK-4950-D9825;TCGA-CK-4950-D72393;TCGA-CK-4950-D72394;TCGA-CK-4950-D72395	c3ab7778-ee30-49f8-8136-659414100e0f;1AC65ADB-8FFA-41F4-B7F5-36245EE1E553;A516255A-FACF-432D-BCC2-21F20A2A4338;41B9C695-3F5C-4EC0-B94D-60E1AE573021	Not Available;Not Available;Not Available;Not Available	1;9;9;9	259;237;237;237	49;49;49;49	FolFox;Oxaliplatin;Leucovorin;Fluorouracil	Not Available;Complete Response;Complete Response;Complete Response	4;6;6;6	11;Not Available;Not Available;Not Available	2280;Not Available;Not Available;Not Available	mg;Not Available;Not Available;Not Available	ADJUVANT;Not Available;Not Available;Not Available	Not Applicable;Not Applicable;Not Applicable;Not Applicable	Not Available;Not Available;Not Available;Not Available	IV;Not Available;Not Available;Not Available	NO;NO;NO;NO	Chemotherapy;Chemotherapy;Ancillary;Chemotherapy	Not Available;Not Available;Not Available;Not Available	Not Available;Not Available;Not Available;Not Available	Not Available;Not Available;Not Available;Not Available	Not Available;NO;NO;NO	2011;2015;2015;2015	NOT HISPANIC OR LATINO	NA
TCGA-D5-6923	378	0	T2	N0	M0	Stage I	NA			57	Sigmoid Colon	TCGA-D5-6923	b3c267aa-345d-40d8-a8da-f9f08c64f9c7	NO	Not Available	10	NO	16	-21118	Not Applicable	0	43	Not Available	NA																								NOT HISPANIC OR LATINO	NA
TCGA-G4-6298	0	1	T4a	N1	MX	Stage IIIB	NA			90	Cecum	TCGA-G4-6298	ab9cc98a-86ae-4913-bcb2-cc3aeff8abb1	NO	Not Available	Not Available	NO	30	-32873	0	0	Not Available	Not Available	NA	TCGA-G4-6298-D21968;TCGA-G4-6298-D21967	b201fb4c-7422-447a-87c1-c46516ed2b91;4b271363-fb42-41fc-ba0a-4a1866ebd1d7	Not Available;Not Available	20;20	0;0	0;0	Irinotecan;Erbitux	Not Available;Not Available	1;1	4;4	176;440	mg;mg	PROGRESSION;PROGRESSION	Not Applicable;Not Applicable	1;1	IV;IV	NO;NO	Chemotherapy;Chemotherapy	Not Available;Not Available	704;1760	mg;mg	Not Available;Not Available	2012;2012	NOT HISPANIC OR LATINO	NA
TCGA-CM-4748	792	0	T4a	N1a	M0	Stage IIIB	NA			53	Transverse Colon	TCGA-CM-4748	cd845618-4cc4-49c2-9055-c171d4c24ee1	NO	Not Available	Not Available	NO	10	-19509	Not Applicable	0	214	Not Available	NA	TCGA-CM-4748-D8952;TCGA-CM-4748-D8951;TCGA-CM-4748-D8954;TCGA-CM-4748-D8953;TCGA-CM-4748-D33829;TCGA-CM-4748-D33830;TCGA-CM-4748-D33832;TCGA-CM-4748-D33833;TCGA-CM-4748-D33835;TCGA-CM-4748-D33837;TCGA-CM-4748-D33838	3ff80bdd-5baf-45b1-a8ff-9fddc1b4a34f;b1b3b1e6-0123-4bf9-96d0-4ce2774d4221;5087eeea-c516-4cce-a7cb-06359bc561a4;1c8484ba-c8e5-4fdb-a458-c6da76730125;6589D529-DF32-4845-817C-4B19554CF287;276FBB94-B1E7-4154-961B-0B78CE2BCFBE;711D3DA5-341B-4192-9BEE-893C7345A568;575D70B6-ED2E-42D8-8622-7DE4314F43B0;76DE2CCB-26BA-4C2B-AD02-F3CEE6D3643A;A0608323-E407-4B3A-8409-32F07626D6C4;BD739F62-0557-4954-8F18-02B97…	Not Available;Not Available;Not Available;Not Available;Not Available;Not Available;Not Available;Not Available;Not Available;Not Available;Not Available	17;17;17;17;19;19;19;19;19;19;19	229;229;229;229;214;365;335;518;518;Not Available;Not Available	75;75;75;75;153;276;304;396;396;670;670	Fluorouracil;Fluorouracil;Oxaliplatin;Leucovorin;Oxaliplatin;IRINOtecan HCl;BEVACIZumab;Floxuridine;Leucovorin Calcium;CETUXimab;IRINOtecan HCl	Not Available;Not Available;Not Available;Not Available;Stable Disease;Stable Disease;Stable Disease;Stable Disease;Stable Disease;Not Applicable;Not Applicable	1;1;1;1;7;7;7;7;7;7;7	12;12;12;12;Not Available;Not Available;Not Available;Not Available;Not Available;Not Available;Not Available	850;2500-2502.1;95-180;850;Not Available;Not Available;Not Available;Not Available;Not Available;Not Available;Not Available	mg;mg;mg;mg;Not Available;Not Available;Not Available;Not Available;Not Available;Not Available;Not Available	ADJUVANT;ADJUVANT;ADJUVANT;ADJUVANT;Not Available;Not Available;Not Available;Not Available;Not Available;Not Available;Not Available	Not Applicable;Not Applicable;Not Applicable;Not Applicable;Not Applicable;Not Applicable;Not Applicable;Not Applicable;Not Applicable;Not Applicable;Not Applicable	1;1;1;1;Not Available;Not Available;Not Available;Not Available;Not Available;Not Available;Not Available	IV;IV;IV;IV;Not Available;Not Available;Not Available;Not Available;Not Available;Not Available;Not Available	NO;NO;NO;NO;NO;NO;NO;NO;NO;YES;YES	Chemotherapy;Chemotherapy;Chemotherapy;Other, specify in notes;Chemotherapy;Chemotherapy;Chemotherapy;Chemotherapy;Ancillary;Chemotherapy;Chemotherapy	Not Available;Not Available;Not Available;Ancillary;Not Available;Not Available;Not Available;Not Available;Not Available;Not Available;Not Available	10200;30010.5;185;10200;Not Available;Not Available;Not Available;Not Available;Not Available;Not Available;Not Available	mg;mg;mg;mg;Not Available;Not Available;Not Available;Not Available;Not Available;Not Available;Not Available	Not Available;Not Available;Not Available;Not Available;NO;NO;NO;NO;NO;NO;NO	2011;2011;2011;2011;2012;2012;2012;2012;2012;2012;2012	NOT HISPANIC OR LATINO	NA
TCGA-A6-5661	1020	0	T3	N0	M0	Stage IIA	NA			80	Ascending Colon	TCGA-A6-5661	4beee9d4-ee52-4fed-bcc4-d300f5ddd4d0	NO	Not Available	Not Available	YES	27	-29446	Not Applicable	0	306	Not Available	NA																								NOT HISPANIC OR LATINO	NA
TCGA-D5-6536	543	0	T3	N0	M0	Stage IIA	NA			73	Sigmoid Colon	TCGA-D5-6536	e83e5700-f968-4978-bb78-56a83936ce8c	NO	Not Available	11	NO	9	-26890	Not Applicable	0	287	Not Available	NA	TCGA-D5-6536-D28926	16cf1090-853e-4a5c-8ba5-6eb873d29def	Not Available	3	Not Available	539	5-FU	Not Available	2	1	425	mg/m2/day	PALLIATIVE	Not Applicable	Not Available	IV	YES	Chemotherapy	Not Available	3750	mg	Not Available	2012	NOT HISPANIC OR LATINO	NA
TCGA-DM-A28A	805	1	T3	N2	M0	Stage IIIC	NA			78	Cecum	TCGA-DM-A28A	9B2C325C-1F03-43C7-AD5C-B49C6D205635	YES	Normal	Not Available	Not Available	27	-28833	805	0	805	Not Available	NA																								NOT HISPANIC OR LATINO	NA
TCGA-D5-6924	435	0	T3	N0	M0	Stage IIA	NA			68	Sigmoid Colon	TCGA-D5-6924	be85f845-b281-467c-8b97-bed7b7fdff64	NO	Not Available	Not Available	NO	21	-24964	Not Applicable	0	89	Not Available	NA																								NOT HISPANIC OR LATINO	NA
TCGA-A6-5660	888	0	T3	N2b	M0	Stage IIIC	NA			73	Cecum	TCGA-A6-5660	0dc41cd5-0672-407c-9b4a-0f5f3970aa54	NO	Not Available	Not Available	YES	31	-26803	Not Applicable	0	342	Not Available	NA	TCGA-A6-5660-D12435;TCGA-A6-5660-D12415;TCGA-A6-5660-D12418;TCGA-A6-5660-D12432	5f1e45b0-0859-4efb-a7e5-efb825e22fc3;609032be-e6d6-428c-909f-f0ba7b2bf342;ef6fde9e-c1b4-4576-aacb-a8869a522738;75cb6eb3-4e9a-421e-a611-3bb290130d80	Not Available;Not Available;Not Available;Not Available	1;1;1;1	243;201;243;245	82;82;82;82	Leucovorin;Oxaliplatin;5FU;5 FU	Not Available;Not Available;Not Available;Not Available	6;6;6;6	12;9;12;12	50-800;131-173;804-820;4824-4920	mg;mg;mg;mg	ADJUVANT;ADJUVANT;ADJUVANT;ADJUVANT	Not Applicable;Not Applicable;Not Applicable;Not Applicable	1;1;1;1	IV;IV;IV;IV	NO;NO;NO;NO	Other, specify in notes;Chemotherapy;Chemotherapy;Chemotherapy	Ancillary;Not Available;Not Available;Not Available	1350;1509;9752;58512	mg;mg;mg;mg	Not Available;Not Available;Not Available;Not Available	2011;2011;2011;2011	NOT HISPANIC OR LATINO	NA
TCGA-A6-A565	494	1	T3	N2	MX	Stage IIIC	NA			34	Transverse Colon	TCGA-A6-A565	DD7A53EE-CB08-40C4-9935-51D1CA17E9E8	Unknown	Not Available	Not Available	YES	12	-12526	494	0	Not Available	Not Available	NA	TCGA-A6-A565-D42141;TCGA-A6-A565-D42143;TCGA-A6-A565-D42144	9F6660B3-7566-45BC-8FAC-96CC0EFC39B4;297A845E-BC66-4A57-9FFD-7244BD48D447;5BD8C24D-85AD-4D45-8D64-5DF0775A2B08	Not Available;Not Available;Not Available	12;12;12	Not Available;Not Available;Not Available	Not Available;Not Available;Not Available	5FU;Leucovorin;Oxaliplatin	Clinical Progressive Disease;Clinical Progressive Disease;Clinical Progressive Disease	4;4;4	Not Available;Not Available;Not Available	Not Available;Not Available;Not Available	Not Available;Not Available;Not Available	Not Available;Not Available;Not Available	Not Applicable;Not Applicable;Not Applicable	Not Available;Not Available;Not Available	Not Available;Not Available;Not Available	NO;NO;NO	Chemotherapy;Ancillary;Chemotherapy	Not Available;Not Available;Not Available	Not Available;Not Available;Not Available	Not Available;Not Available;Not Available	NO;NO;NO	2013;2013;2013	Unknown	NA
TCGA-A6-6653	742	0	T2	N0	M0	Stage I	NA			82	Ascending Colon	TCGA-A6-6653	68801d41-535f-4b38-989b-ef4fe5f00039	YES	Abnormal	Not Available	NO	10	-29996	Not Applicable	0	91	Not Available	NA																								NOT HISPANIC OR LATINO	NA
TCGA-A6-6649	735	0	T3	N1b	M0	Stage IIIB	NA			66	Discrepancy	TCGA-A6-6649	39b6ae01-c97b-4234-8a28-208fdf170432	NO	Not Available	Not Available	YES	9	-24237	Not Applicable	0	147	Not Available	NA	TCGA-A6-6649-D19132;TCGA-A6-6649-D19131;TCGA-A6-6649-D19161;TCGA-A6-6649-D19176	e68051a4-b42e-43a5-9114-81f73b2852ff;b90ac8b4-29d6-490c-bacc-1b28fc09e6ca;6d48ab98-3956-42ff-b409-3acaa4fe5334;5a80c12d-0cbd-4019-9d7c-d07152df3d3d	Not Available;Not Available;Not Available;Not Available	2;2;5;5	145;68;147;145	68;68;68;68	Fluorouracil;Oxaliplatin;Fluorouracil;Leucovorin	Not Available;Not Available;Not Available;Not Available	12;12;12;12	6;1;6;6	664-948;197;3982-5688;50-175	mg;mg;mg;mg	ADJUVANT;ADJUVANT;ADJUVANT;ADJUVANT	Not Applicable;Not Applicable;Not Applicable;Not Applicable	1;1;1;1	IV;IV;IV;IV	NO;NO;NO;NO	Chemotherapy;Chemotherapy;Chemotherapy;Other, specify in notes	Not Available;Not Available;Not Available;Ancillary	4713;197;28277;575	mg;mg;mg;mg	Not Available;Not Available;Not Available;Not Available	2011;2011;2011;2011	NOT HISPANIC OR LATINO	NA
TCGA-CM-5348	699	0	T3	N1a	M0	Stage IIIB	NA			72	Cecum	TCGA-CM-5348	b89267a4-0e6b-401e-85b0-e66775858aa6	NO	Not Available	Not Available	YES	3	-26543	Not Applicable	0	393	Not Available	NA																								NOT HISPANIC OR LATINO	NA
TCGA-A6-2682	424	1	T4b	N1	M1	Stage IV	NA			70	Discrepancy	TCGA-A6-2682	77a44132-af22-4115-9fa2-78f2f74bf687	NO	Not Available	Not Available	NO	28	-25683	424	0	Not Available	Not Available	NA	TCGA-A6-2682-D6910;TCGA-A6-2682-D6907;TCGA-A6-2682-D6909;TCGA-A6-2682-D6905;TCGA-A6-2682-D6906;TCGA-A6-2682-D6911;TCGA-A6-2682-D6908;TCGA-A6-2682-D6912	6daa7738-34ec-47e4-b489-6b1935932b6d;22f90f8f-9bd8-4e02-b69d-306207facef8;450d6b36-99fe-499b-93bc-548de8a785d9;06febf7e-3cba-45b5-a1fb-b6935217ea74;f0e8ad72-519f-4d7a-806d-4c861525fef7;273a2571-4f64-4350-b5d6-02ac929b2184;6d41c707-6c72-4ead-9e68-6677b9ae902d;ce77ae94-e1dc-41e4-989a-8891fd070a58	Not Available;Not Available;Not Available;Not Available;Not Available;Not Available;Not Available;Not Available	28;28;28;28;28;28;1;1	282;106;282;106;106;282;108;284	231;43;231;43;43;231;43;231	5 FU;5 FU;Oxaliplatin;Oxaliplatin;Leucovorin;Leucovorin;5 FU;5 FU	Not Available;Not Available;Not Available;Not Available;Not Available;Not Available;Not Available;Not Available	1;1;1;1;1;1;2;2	4;5;4;5;5;4;5;4	420-856;400-836;89-182;100-178;400-850;400-850;2000-5000;2500-5136	mg;mg;mg;mg;mg;mg;mg;mg	ADJUVANT;ADJUVANT;ADJUVANT;ADJUVANT;ADJUVANT;ADJUVANT;ADJUVANT;ADJUVANT	Not Applicable;Not Applicable;Not Applicable;Not Applicable;Not Applicable;Not Applicable;Not Applicable;Not Applicable	2;1;2;1;1;2;1;2	IV;IV;IV;IV;IV;IV;IV;IV	NO;NO;NO;NO;NO;NO;NO;NO	Chemotherapy;Chemotherapy;Chemotherapy;Chemotherapy;Other, specify in notes;Other, specify in notes;Chemotherapy;Chemotherapy	Not Available;Not Available;Not Available;Not Available;Ancillary;Ancillary;Not Available;Not Available	2972;3310;631;783;3350;2950;19,021;17812	mg;mg;mg;mg;mg;mg;mg;mg	Not Available;Not Available;Not Available;Not Available;Not Available;Not Available;Not Available;Not Available	2011;2011;2011;2011;2011;2011;2011;2011	NOT HISPANIC OR LATINO	NA
TCGA-CM-6680	366	0	T3	N2a	M0	Stage IIIB	NA			78	Cecum	TCGA-CM-6680	fb9e7684-a7f7-4f17-bc5d-1f359e1b0d42	NO	Not Available	Not Available	NO	Not Available	-28701	Not Applicable	0	91	Not Available	NA																								NOT HISPANIC OR LATINO	NA
TCGA-AA-3495	1127	0	T2	N0	M0	Stage I	NA			79	Hepatic Flexure	TCGA-AA-3495	15b987ba-77ab-477b-a54a-65ec5c7c399e	NO	Not Available	Not Available	Not Available	18	-28886	Not Applicable	0	31	Not Available	NA																								Not Available	NA
TCGA-CM-4743	701	0	T3	N0	M0	Stage IIA	NA			69	Hepatic Flexure	TCGA-CM-4743	c8d7eb0f-2502-4277-a8ef-435b08f3c863	NO	Not Available	Not Available	NO	24	-25291	Not Applicable	0	184	Not Available	NA	TCGA-CM-4743-D8949	84924e2f-cab0-49c8-988d-1c3f4b53769a	Not Available	17	235	108	Capecitabine	Not Available	1	6	1500	mg	ADJUVANT	Not Applicable	1	PO	NO	Chemotherapy	Not Available	9000	mg	Not Available	2011	NOT HISPANIC OR LATINO	NA
TCGA-G4-6323	419	0	Tis	N0	MX	Stage IA	NA			50	Cecum	TCGA-G4-6323	0c463362-7925-4d9a-9d63-098b50af2fb9	NO	Not Available	Not Available	NO	13	-18334	Not Applicable	0	201	Not Available	NA																								NOT HISPANIC OR LATINO	NA
TCGA-CK-5912	1493	1	T2	N0	MX	Stage I	NA			81	Cecum	TCGA-CK-5912	c085da47-d634-491a-80ea-514e5a231f70	NO	Not Available	140	YES	Not Available	-29938	Not Applicable	0	1466	Not Available	NA																								NOT HISPANIC OR LATINO	NA
TCGA-DM-A285	179	1	T3	N2	M1	Stage IV	NA			71	Ascending Colon	TCGA-DM-A285	99C532B0-6B42-4925-A344-FC7262C415EE	YES	Normal	Not Available	YES	27	-26021	179	0	Not Available	Not Available	NA																								NOT HISPANIC OR LATINO	NA
TCGA-G4-6315	1883	0	T3	N1	M1	Stage IV	NA			66	Descending Colon	TCGA-G4-6315	ca5b878f-8bff-410a-8e6e-b1c133018c8d	NO	Not Available	1	YES	5	-24174	Not Applicable	0	937	Not Available	NA	TCGA-G4-6315-D21985;TCGA-G4-6315-D21992;TCGA-G4-6315-D21990	9a8027b9-bdd9-4354-a3df-7c8b335184b3;fcc343e4-8a19-46af-93e6-fe2c4ef5ad4b;ac5b93fb-3aa7-4ff2-8699-5acfe146f59e	Not Available;Not Available;Not Available	27;27;27	180;180;138	40;40;40	Fluorouracil;Bevacizumab;Oxaliplatin	Not Available;Not Available;Not Available	1;1;1	10;11;8	672;298;143	mg;mg;mg	ADJUVANT;ADJUVANT;ADJUVANT	Not Applicable;Not Applicable;Not Applicable	1;1;1	IV;IV;IV	NO;NO;NO	Chemotherapy;Chemotherapy;Chemotherapy	Not Available;Not Available;Not Available	6742;3267;1136	mg;mg;mg	Not Available;Not Available;Not Available	2012;2012;2012	NOT HISPANIC OR LATINO	NA
TCGA-AY-A8YK	573	0	T3	N2a	M1	Stage IVA	NA			44	Sigmoid Colon	TCGA-AY-A8YK	C6F6C032-5D4E-4028-AED0-24A587620354	NO	Not Available	Not Available	NO	10	-16140	Not Applicable	0	209	Not Available	NA	TCGA-AY-A8YK-D66229;TCGA-AY-A8YK-D66236;TCGA-AY-A8YK-D66237	809D0B32-3328-4D10-8884-A1A6FAAA9656;B61E9618-2291-43AD-97BE-8C4C0B8DF4FD;8E470806-DD81-425B-AAD4-C6CFF304F12C	Not Available;Not Available;Not Available	6;6;6	286;146;111	69;69;83	5FU;Oxaliplatin;Bevacizumab	Complete Response;Complete Response;Complete Response	10;10;10	Not Available;Not Available;Not Available	Not Available;Not Available;Not Available	Not Available;Not Available;Not Available	Not Available;Not Available;Not Available	Not Applicable;Not Applicable;Not Applicable	Not Available;Not Available;Not Available	Not Available;Not Available;Not Available	NO;NO;NO	Chemotherapy;Chemotherapy;Immunotherapy	Not Available;Not Available;Not Available	Not Available;Not Available;Not Available	Not Available;Not Available;Not Available	NO;NO;NO	2014;2014;2014	NOT HISPANIC OR LATINO	NA
TCGA-NH-A50T	553	0	T3	N0	MX	Stage IIA	NA			68	Splenic Flexure	TCGA-NH-A50T	490EABCA-4575-4BD6-9604-6B6E23D069CE	NO	Not Available	Not Available	NO	8	-25089	Not Applicable	0	125	Not Available	NA																								NOT HISPANIC OR LATINO	NA
TCGA-AA-3660	2375	0	T3	N0	M0	Stage II	NA			51	Sigmoid Colon	TCGA-AA-3660	f9b5e6a5-c2da-4a0d-9251-bb6f557b7b58	NO	Not Available	Not Available	Not Available	18	-18932	Not Applicable	0	31	Not Available	NA																								Not Available	NA
TCGA-A6-3810	1111	0	T3	N0	M0	Stage IIA	NA	FPPP	TCGA	62	Sigmoid Colon	TCGA-A6-3810	b728e6e8-a0e4-496b-904c-6f07c12e901f	NO	Not Available	Not Available	NO	19	-22999	Not Applicable	0	247	Not Available	NA																								NOT HISPANIC OR LATINO	NA
TCGA-CK-4951	1492	0	T3	N0	M0	Stage IIA	NA			79	Ascending Colon	TCGA-CK-4951	2db3c23d-c591-4ea0-b0a8-ed9c4343c80e	NO	Not Available	72	NO	29	-28982	Not Applicable	0	1492	Not Available	NA																								NOT HISPANIC OR LATINO	NA
TCGA-D5-6930	406	0	T3	N0	M0	Stage IIA	NA			67	Ascending Colon	TCGA-D5-6930	286cbae3-8324-43b7-9b20-0f40dda1588e	NO	Not Available	40	YES	21	-24764	Not Applicable	0	46	Not Available	NA																								NOT HISPANIC OR LATINO	NA
TCGA-AY-A54L	525	0	T2	N0	M0	Stage I	NA			74	Transverse Colon	TCGA-AY-A54L	D8E9EA52-FF28-4626-BAA3-71350FD53DDF	Not Available	Not Available	Not Available	NO	26	-27074	Not Applicable	0	158	Not Available	NA																								Not Evaluated	NA
TCGA-CM-6675	397	0	T3	N2b	M1b	Stage IVB	NA			35	Cecum	TCGA-CM-6675	fce1fd5a-54d2-4260-b187-4eb7035e96e9	NO	Not Available	Not Available	NO	Not Available	-12935	Not Applicable	0	153	Not Available	NA	TCGA-CM-6675-D17053;TCGA-CM-6675-D17055;TCGA-CM-6675-D17056;TCGA-CM-6675-D17058;TCGA-CM-6675-D30935;TCGA-CM-6675-D30939;TCGA-CM-6675-D30940;TCGA-CM-6675-D30942;TCGA-CM-6675-D30943;TCGA-CM-6675-D17052	95f85e67-bcf8-41f4-ab52-2987bb657f7f;7ca01e01-187e-4151-8bb8-ce64a784aa3b;561e1b28-4f4f-4a49-ac98-773ff5f37469;c2e7d5c5-7b1f-4a5c-9df4-a5a48969c93c;d1a17bb6-9a68-4c16-9360-01cd3518b8d4;e3a83403-6a75-451b-a0e6-0cbd8e0635a8;e24f390b-4610-43a6-8399-34d5373fb519;a3363539-73b2-432d-aaaa-e0638f2cc5df;63a50739-dc5b-40cd-90f2-b709c14dfde0;c2c0fc72-b0b4-41c1-83bf-df641b19a714	Not Available;Not Available;Not Available;Not Available;Not Available;Not Available;Not Available;Not Available;Not Available;Not Available	19;19;30;30;19;19;19;19;19;19	184;184;150;152;Not Available;Not Available;Not Available;Not Available;Not Available;178	24;24;24;54;337;337;337;366;337;24	Fluorouracil;Leucovorin Calcium;Oxaliplatin;Pegfilgrastim;Fluorouracil;IRINOtecan HCl;Leucovorin Calcium;Cetuximab;Floxuridine;Fluorouracil	Not Available;Not Available;Not Available;Not Available;Not Applicable;Not Applicable;Not Applicable;Not Applicable;Not Applicable;Not Available	4;4;9;9;4;4;4;4;4;4	12;12;10;7;Not Available;Not Available;Not Available;Not Available;Not Available;12	2800;900;190;6;Not Available;Not Available;Not Available;Not Available;Not Available;900	mg;mg;mg;mg;Not Available;Not Available;Not Available;Not Available;Not Available;mg	ADJUVANT;ADJUVANT;ADJUVANT;ADJUVANT;Not Available;Not Available;Not Available;Not Available;Not Available;ADJUVANT	Not Applicable;Not Applicable;Not Applicable;Not Applicable;Not Applicable;Not Applicable;Not Applicable;Not Applicable;Not Applicable;Not Applicable	1;1;1;1;Not Available;Not Available;Not Available;Not Available;Not Available;1	IV;IV;IV;SC;Not Available;Not Available;Not Available;Not Available;Not Available;IV	NO;NO;NO;NO;YES;YES;YES;YES;YES;NO	Chemotherapy;Other, specify in notes;Chemotherapy;Other, specify in notes;Chemotherapy;Chemotherapy;Chemotherapy;Chemotherapy;Chemotherapy;Chemotherapy	Not Available;Ancillary;Not Available;Ancillary;Not Available;Not Available;Not Available;Not Available;Not Available;Not Available	32600;9400;1780;42;Not Available;Not Available;Not Available;Not Available;Not Available;9400	mg;mg;mg;mg;Not Available;Not Available;Not Available;Not Available;Not Available;mg	Not Available;Not Available;Not Available;Not Available;NO;NO;NO;NO;NO;Not Available	2011;2011;2011;2011;2012;2012;2012;2012;2012;2012	NOT HISPANIC OR LATINO	NA
TCGA-CA-6715	383	0	T3	N1	M0	Stage IIIB	NA			63	Sigmoid Colon	TCGA-CA-6715	794131b8-f4be-4f15-b3b9-6f0b10a5a38b	Not Available	Not Available	Not Available	Not Available	8	-23075	Not Applicable	0	2	Not Available	NA	TCGA-CA-6715-D70876;TCGA-CA-6715-D70878;TCGA-CA-6715-D70879	2A89E239-0062-4F9E-8946-8BD697383709;A3B59973-3FCE-44E7-99DE-11330368700D;56419CB6-A31A-4499-A503-8EBEDBCC1950	Not Available;Not Available;Not Available	10;10;10	227;227;227	44;44;44	oxaliplatin;5-Fluorouracil;Folinic Acid	Complete Response;Complete Response;Complete Response	3;3;3	Not Available;Not Available;Not Available	Not Available;Not Available;Not Available	Not Available;Not Available;Not Available	Not Available;Not Available;Not Available	Not Applicable;Not Applicable;Not Applicable	Not Available;Not Available;Not Available	Not Available;Not Available;Not Available	NO;NO;NO	Chemotherapy;Chemotherapy;Chemotherapy	Not Available;Not Available;Not Available	Not Available;Not Available;Not Available	Not Available;Not Available;Not Available	NO;NO;NO	2015;2015;2015	NOT HISPANIC OR LATINO	NA
TCGA-D5-5537	1381	1	T3	N2	MX		NA			83	Ascending Colon	TCGA-D5-5537	ae6b315f-3f78-4695-adfa-48b0bbab2c89	NO	Not Available	Not Available	YES	28	-30505	Not Applicable	0	456	Not Available	NA																								NOT HISPANIC OR LATINO	NA
TCGA-AZ-6605	159	1	T4	N1	M0	Stage IIIB	NA			77	Ascending Colon	TCGA-AZ-6605	849031de-ac8a-4012-9362-d192512997f1	Not Available	Not Available	Not Available	Not Available	2	-28485	159	0	Not Available	Not Available	NA	TCGA-AZ-6605-D34155	06300BAA-C980-4F05-B262-22DD1912B178	Not Available	31	105	56	FOLFOX	Stable Disease	7	Not Available	Not Available	Not Available	Not Available	Not Applicable	Not Available	Not Available	NO	Chemotherapy	Not Available	Not Available	Not Available	NO	2012	NOT HISPANIC OR LATINO	NA
TCGA-A6-6782	617	0	T4a	N0	MX	Stage IIB	NA			82	Discrepancy	TCGA-A6-6782	3eb37b12-b8b4-40a3-bd8b-f89fc39c05fa	NO	Not Available	Not Available	NO	6	-30012	Not Applicable	0	164	Not Available	NA																								NOT HISPANIC OR LATINO	NA
TCGA-4N-A93T	146	0	T4a	N1b	M0	Stage IIIB	NA			67	Ascending Colon	TCGA-4N-A93T	92554413-9EBC-4354-8E1B-9682F3A031D9	NO	Not Available	30	YES	1	-24523	Not Applicable	0	8	Not Available	NA	TCGA-4N-A93T-D65957	25E5CD87-BB8D-4D2A-8219-1660D2F13AEE	Not Available	1	Not Available	68	Xeloda	Not Applicable	10	Not Available	Not Available	Not Available	Not Available	Not Applicable	Not Available	Not Available	YES	Chemotherapy	Not Available	Not Available	Not Available	NO	2014	NOT HISPANIC OR LATINO	NA
TCGA-NH-A8F8	511	1	T4a	N2b	M1	Stage IV	NA			79	Ascending Colon	TCGA-NH-A8F8	1E0789D6-7EFB-4807-8D36-CD9224675A0C	NO	Not Available	80	NO	15	-29185	Not Applicable	0	167	Not Available	NA	TCGA-NH-A8F8-D58585;TCGA-NH-A8F8-D58586;TCGA-NH-A8F8-D58588;TCGA-NH-A8F8-D67094;TCGA-NH-A8F8-D67096	49ED1A3E-5F7C-4833-B8EC-4A3E03CE86FB;7642A17D-2740-4D28-A1B8-38B3CD34BF8E;913BD500-F875-4D0F-A2E7-65FF6CC7FFE6;D595C873-FA75-4453-89C2-319731CC8214;3B1F2085-8877-45C8-9B40-3405840006A1	Not Available;Not Available;Not Available;Not Available;Not Available	15;15;15;30;30	476;181;469;Not Available;Not Available	49;49;76;292;323	fluorouracil;oxaliplatin;bevacizumab;bevacizumab;capecitabine	Clinical Progressive Disease;Unknown;Unknown;Not Applicable;Not Applicable	4;4;4;10;10	Not Available;Not Available;Not Available;Not Available;Not Available	Not Available;Not Available;Not Available;Not Available;Not Available	Not Available;Not Available;Not Available;Not Available;Not Available	Not Available;Not Available;Not Available;Not Available;Not Available	Not Applicable;Not Applicable;Not Applicable;Not Applicable;Not Applicable	Not Available;Not Available;Not Available;Not Available;Not Available	Not Available;Not Available;Not Available;Not Available;Not Available	NO;NO;NO;YES;YES	Chemotherapy;Chemotherapy;Immunotherapy;Immunotherapy;Chemotherapy	Not Available;Not Available;Not Available;Not Available;Not Available	Not Available;Not Available;Not Available;Not Available;Not Available	Not Available;Not Available;Not Available;Not Available;Not Available	NO;NO;NO;NO;NO	2014;2014;2014;2014;2014	NOT HISPANIC OR LATINO	NA
TCGA-D5-6538	521	0	T3	N2	M0	Stage IIIB	NA			79	Hepatic Flexure	TCGA-D5-6538	a117ace8-ac5a-48d8-8aee-3024d6f0f873	Not Available	Not Available	Not Available	NO	13	-29194	Not Applicable	0	246	Not Available	NA	TCGA-D5-6538-D28625	fe993031-2966-48c0-af72-b6e31f2652ec	Not Available	27	Not Available	23	XELODA	Not Available	2	Not Available	500mg	mg	ADJUVANT	Not Applicable	Not Available	PO	YES	Chemotherapy	Not Available	Not Available	Not Available	Not Available	2012	NOT HISPANIC OR LATINO	NA
TCGA-A6-A567	1881	1	T3	N1	M1	Stage IV	NA			56	Sigmoid Colon	TCGA-A6-A567	857A5889-19E7-4208-8362-F1377C408037	Unknown	Not Available	Not Available	YES	18	-20493	1881	0	Not Available	Not Available	NA																								Not Evaluated	NA
TCGA-AD-6963	834	0	T3	N0	MX		NA			58	Ascending Colon	TCGA-AD-6963	47a8e514-904c-4867-8f43-7eb573be835b	NO	Not Available	48	Not Available	17	-21294	Not Applicable	0	3	Not Available	NA																								Not Available	NA
TCGA-A6-6141	255	0	T3	N0	M0	Stage IIA	NA			31	Cecum	TCGA-A6-6141	58facedb-fcb8-4ecf-8338-2bfa4947acef	NO	Not Available	Not Available	Not Available	17	-11391	Not Applicable	0	130	Not Available	NA	TCGA-A6-6141-D21504;TCGA-A6-6141-D21501;TCGA-A6-6141-D21502;TCGA-A6-6141-D21503	268e1286-26c0-4536-9f42-c7f5ea328d67;f3ddb88f-1ac9-4fe8-99c0-9c299af34ae0;7fd0f190-15dc-4f21-bd5a-4b7a10378e8a;9b6fffa2-0197-4e5d-83b7-6799693aecb7	Not Available;Not Available;Not Available;Not Available	14;14;14;14	216;214;214;214	60;60;60;60	5FU;Oxaliplatin;Leucovorin;5FU	Not Available;Not Available;Not Available;Not Available	2;2;2;2	12;12;12;12	5150;180;550;850	mg;mg;mg;mg	ADJUVANT;ADJUVANT;ADJUVANT;ADJUVANT	Not Applicable;Not Applicable;Not Applicable;Not Applicable	1;1;1;1	IV;IV;IV;IV	NO;NO;NO;NO	Chemotherapy;Chemotherapy;Other, specify in notes;Chemotherapy	Not Available;Not Available;Ancillary;Not Available	61800;2160;4900;10200	mg;mg;mg;mg	Not Available;Not Available;Not Available;Not Available	2012;2012;2012;2012	NOT HISPANIC OR LATINO	NA
TCGA-DM-A1DA	228	1	T3	N2	M0	Stage IIIC	NA			71	Cecum	TCGA-DM-A1DA	f4a804d3-b5c4-4da5-800f-6e5757ecfa1c	YES	Normal	Not Available	Not Available	Not Available	-26169	228	0	228	228	NA																								NOT HISPANIC OR LATINO	NA
TCGA-WS-AB45	2130	0	T3	N0	MX	Stage IIA	NA			52	Cecum	TCGA-WS-AB45	7F6898E2-A840-4AD1-80F7-783F8B766FCC	Not Available	Not Available	0.05	NO	16	Not Available	Not Applicable	0	2038	Not Available	NA																								NOT HISPANIC OR LATINO	NA
TCGA-D5-6535	460	0	T3	N1	MX	Stage IIIB	NA			80	Ascending Colon	TCGA-D5-6535	a123dc45-e427-461e-8d60-c51307aa498c	NO	Not Available	1	YES	9	-29278	Not Applicable	0	10	Not Available	NA																								NOT HISPANIC OR LATINO	NA
TCGA-CM-6679	306	0	T3	N0	M0	Stage IIA	NA			58	Sigmoid Colon	TCGA-CM-6679	76e96b5a-b565-42c7-a651-34d5132e6dde	NO	Not Available	40	NO	Not Available	-21519	Not Applicable	0	122	Not Available	NA																								NOT HISPANIC OR LATINO	NA
TCGA-D5-6932	346	0	T3	N0	M0	Stage IIA	NA			69	Transverse Colon	TCGA-D5-6932	131e0571-de86-415f-b3fb-dc9f971258d3	NO	Not Available	Not Available	YES	21	-25466	Not Applicable	0	19	Not Available	NA																								NOT HISPANIC OR LATINO	NA
TCGA-AA-3712	0	0	T3	N2	M0	Stage III	NA			65	Descending Colon	TCGA-AA-3712	2b94070a-21ec-457b-88af-3d2a89b97ac6	NO	Not Available	Not Available	Not Available	18	-23831	Not Applicable	0	0	Not Available	NA																								Not Available	NA
TCGA-AA-3511	212	0	T4	N0	M0	Stage II	NA			64	Sigmoid Colon	TCGA-AA-3511	93edb105-5dc9-4a4a-9fca-c91f0161fcc7	NO	Not Available	Not Available	Not Available	18	-23407	Not Applicable	0	0	Not Available	NA																								Not Available	NA
TCGA-AZ-4616	156	1	T3	N2	M1	Stage IV	NA			82	Cecum	TCGA-AZ-4616	e703af88-c05f-4d7b-b225-d640e4d1a2a5	Not Available	Not Available	Not Available	Not Available	30	-30043	156	0	Not Available	Not Available	NA	TCGA-AZ-4616-D31069	ee6f05bf-df9b-4ced-8826-a19eafb73cc6	Not Available	23	Not Available	113	XELODA	Stable Disease	4	Not Available	Not Available	Not Available	Not Available	Not Applicable	Not Available	Not Available	NO	Chemotherapy	Not Available	Not Available	Not Available	NO	2012	NOT HISPANIC OR LATINO	NA
TCGA-A6-2671	1331	1	T3	N2	M1	Stage IV	NA			85	Sigmoid Colon	TCGA-A6-2671	565e2726-4942-4726-89d3-c5e3797f7204	NO	Not Available	Not Available	NO	28	-31329	Not Applicable	0	648	Not Available	NA	TCGA-A6-2671-D6020;TCGA-A6-2671-D6055;TCGA-A6-2671-D6059;TCGA-A6-2671-D6049;TCGA-A6-2671-D6091;TCGA-A6-2671-D6025;TCGA-A6-2671-D6046;TCGA-A6-2671-D6092;TCGA-A6-2671-D6051;TCGA-A6-2671-D6056;TCGA-A6-2671-D12772;TCGA-A6-2671-D12770;TCGA-A6-2671-D12768;TCGA-A6-2671-D12771;TCGA-A6-2671-D12773;TCGA-A6-2671-D31097;TCGA-A6-2671-D31177;TCGA-A6-2671-D31178;TCGA-A6-2671-D31179;TCGA-A6-2671-D31180;TCGA-A6-2…	3aefce87-3734-4b5f-a4e2-c62dbba5badf;409b319f-5642-4f38-8e5d-d948107d0425;dc9ad6a9-f324-4d56-93ae-dad6cd659a43;891f0411-bdcc-468d-bc50-acc539d6bc11;75929a1b-da0b-4859-9592-e0b096b3e46c;b7b6c0f7-bf3f-45c3-b847-79b03842ba16;c8f771fa-6176-48de-8426-1f572f7866d8;fdda207f-5b42-4d35-87bc-c3156b31312d;25d52ff6-0b91-435d-8fc0-dcdc5519fa81;4c5e40d8-6a8a-4638-8b23-2461b1dcdd79;6d5ce679-235e-463c-85a8-d6812…	Not Available;Not Available;Not Available;Not Available;Not Available;Not Available;Not Available;Not Available;Not Available;Not Available;Not Available;Not Available;Not Available;Not Available;Not Available;Not Available;Not Available;Not Available;Not Available;Not Available;Not Available;Not Available	11;12;12;12;12;12;12;12;12;12;7;7;7;7;7;24;24;24;24;24;24;24	270;270;Not Available;270;Not Available;270;186;Not Available;272;Not Available;754;754;711;756;739;984;844;844;846;984;1105;1091	96;96;551;96;551;96;96;551;96;551;725;551;551;551;551;844;844;844;844;844;1041;1041	Study drug AMG 655;5 FU;Irinotecan;Leucovorin;5 FU;Avastin;Oxaliplatin;5 FU;5 FU;Avastin;Leucovorin;5 FU;Irinotecan;5FU;Avastin;Irinotecan;5-FU;Leucovorin;5-FU;Avastin;Irinotecan;Erbitux	Not Available;Not Available;Not Available;Not Available;Not Available;Not Available;Not Available;Not Available;Not Available;Not Available;Not Available;Not Available;Not Available;Not Available;Not Available;Clinical Progressive Disease;Clinical Progressive Disease;Clinical Progressive Disease;Clinical Progressive Disease;Clinical Progressive Disease;Clinical Progressive Disease;Clinical Progre…	1;1;1;1;1;1;1;1;1;1;6;6;6;6;6;4;4;4;4;4;4;4	12;12;7;12;7;12;7;7;12;7;3;13;9;13;12;Not Available;Not Available;Not Available;Not Available;Not Available;Not Available;Not Available	Not Available;450-735;320-325;700-735;725;300-320;115-155;4300-4325;2650-4400;300-325;500;725;300-320;4300-4325;300-325;Not Available;Not Available;Not Available;Not Available;Not Available;Not Available;Not Available	mg/kg;mg;mg;mg;mg;mg;mg;mg;mg;mg;mg;mg;mg;mg;mg;Not Available;Not Available;Not Available;Not Available;Not Available;Not Available;Not Available	PALLIATIVE;PALLIATIVE;PROGRESSION;PALLIATIVE;PROGRESSION;PALLIATIVE;PALLIATIVE;PROGRESSION;PALLIATIVE;PROGRESSION;PROGRESSION;PROGRESSION;PROGRESSION;PROGRESSION;PROGRESSION;Not Available;Not Available;Not Available;Not Available;Not Available;Not Available;Not Available	Not Applicable;Not Applicable;Not Applicable;Not Applicable;Not Applicable;Not Applicable;Not Applicable;Not Applicable;Not Applicable;Not Applicable;Not Applicable;Not Applicable;Not Applicable;Not Applicable;Not Applicable;Not Applicable;Not Applicable;Not Applicable;Not Applicable;Not Applicable;Not Applicable;Not Applicable	1;1;1;1;2;1;1;2;1;2;2;2;2;2;2;Not Available;Not Available;Not Available;Not Available;Not Available;Not Available;Not Available	IV;IV;IV;IV;IV;IV;IV;IV;IV;IV;Intravesical;IV;IV;IV;IV;Not Available;Not Available;Not Available;Not Available;Not Available;Not Available;Not Available	NO;NO;YES;NO;YES;NO;NO;YES;NO;YES;NO;NO;NO;NO;NO;NO;NO;NO;NO;NO;NO;NO	Other, specify in notes;Chemotherapy;Chemotherapy;Other, specify in notes;Chemotherapy;Targeted Molecular therapy;Chemotherapy;Chemotherapy;Chemotherapy;Targeted Molecular therapy;Other, specify in notes;Chemotherapy;Chemotherapy;Chemotherapy;Targeted Molecular therapy;Chemotherapy;Chemotherapy;Ancillary;Chemotherapy;Targeted Molecular therapy;Chemotherapy;Targeted Molecular therapy	Protocol AMG 20060464;Not Available;Not Available;Ancillary;Not Available;Not Available;Not Available;Not Available;Not Available;Not Available;Ancillary;Not Available;Not Available;Not Available;Not Available;Not Available;Not Available;Not Available;Not Available;Not Available;Not Available;Not Available	Not Available;7185;2250;8435;5075;3620;985;30200;42950;2200;1500;9425;2890;56000;3775;Not Available;Not Available;Not Available;Not Available;Not Available;Not Available;Not Available	mg/kg;mg;mg;mg;mg;mg;mg;mg;mg;mg;mg;mg;mg;mg;mg;Not Available;Not Available;Not Available;Not Available;Not Available;Not Available;Not Available	Not Available;Not Available;Not Available;Not Available;Not Available;Not Available;Not Available;Not Available;Not Available;Not Available;Not Available;Not Available;Not Available;Not Available;Not Available;NO;NO;NO;NO;NO;NO;NO	2011;2011;2011;2011;2011;2011;2011;2011;2011;2011;2011;2011;2011;2011;2011;2012;2012;2012;2012;2012;2012;2012	NOT HISPANIC OR LATINO	NA
TCGA-D5-6534	1316	0	T3	N0	M0	Stage IIA	NA			62	Ascending Colon	TCGA-D5-6534	d259eeb2-d15e-436d-9d37-2d0b7658bc91	NO	Not Available	Not Available	YES	9	-22778	Not Applicable	0	241	Not Available	NA																								NOT HISPANIC OR LATINO	NA
TCGA-AM-5821	28	0	T3	N0	M0	Stage IIA	NA			68	Sigmoid Colon	TCGA-AM-5821	605baa86-79e3-484d-82d2-4de27d405ba1	NO	Not Available	Not Available	Not Available	15	-24903	Not Applicable	0	28	Not Available	NA																								NOT HISPANIC OR LATINO	NA
TCGA-A6-2672	1419	0	T3	N1	M0	Stage IIIB	NA			82	Discrepancy	TCGA-A6-2672	b612d491-7442-4119-a53c-5ebcc35c31f4	NO	Not Available	Not Available	NO	4	-30237	Not Applicable	0	503	Not Available	NA																								NOT HISPANIC OR LATINO	NA
TCGA-F4-6569	1087	0	T2	N0	M0	Stage I	NA			60	Transverse Colon	TCGA-F4-6569	d3062aac-4c42-41b4-a9f3-90aa72e6fb1e	NO	Not Available	Not Available	Not Available	20	-22203	Not Applicable	0	0	Not Available	NA	TCGA-F4-6569-D63479;TCGA-F4-6569-D63480	07B6950E-FF2F-4B33-BFF0-9CB598F7EFE2;6AC4AB3C-AA5A-4D66-B031-2ED464C10E17	Not Available;Not Available	11;11	201;201	23;23	Leucovorin;5-Fluorouracil	Complete Response;Complete Response	8;8	Not Available;Not Available	Not Available;Not Available	Not Available;Not Available	Not Available;Not Available	Not Applicable;Not Applicable	Not Available;Not Available	Not Available;Not Available	NO;NO	Ancillary;Chemotherapy	Not Available;Not Available	Not Available;Not Available	Not Available;Not Available	NO;NO	2014;2014	NOT HISPANIC OR LATINO	NA
TCGA-RU-A8FL	1177	0	T3	N2a	MX	Stage IIIB	NA			51	Cecum	TCGA-RU-A8FL	5F6ED48B-3B5A-4D20-8FBF-C9AA3FEEA186	NO	Not Available	65	NO	24	-18975	Not Applicable	0	921	Not Available	NA	TCGA-RU-A8FL-D68261;TCGA-RU-A8FL-D68258;TCGA-RU-A8FL-D68257;TCGA-RU-A8FL-D68088	C47FCF93-73B8-400B-B465-F031923491F1;35B51064-B60A-468F-A98F-BAC6F14F516D;09D26C80-A0A1-453B-901C-347775472D0F;6F9A2902-54C7-401D-BEEB-5A1F444AFCCE	Not Available;Not Available;Not Available;Not Available	14;14;14;14	756;677;334;210	679;343;270;48	C1 FOLFIRI/Zaltrap;Irinotecan + Cetuximab;FOLFIRI/Avastin;FOLFOX	Clinical Progressive Disease;Clinical Progressive Disease;Clinical Progressive Disease;Clinical Progressive Disease	11;11;11;11	Not Available;Not Available;Not Available;Not Available	Not Available;Not Available;Not Available;Not Available	Not Available;Not Available;Not Available;Not Available	Not Available;Not Available;Not Available;Not Available	Not Applicable;Not Applicable;Not Applicable;Not Applicable	Not Available;Not Available;Not Available;Not Available	Not Available;Not Available;Not Available;Not Available	NO;NO;NO;NO	Chemotherapy;Chemotherapy;Chemotherapy;Chemotherapy	Not Available;Not Available;Not Available;Not Available	Not Available;Not Available;Not Available;Not Available	Not Available;Not Available;Not Available;Not Available	NO;NO;NO;NO	2014;2014;2014;2014	NOT HISPANIC OR LATINO	NA
TCGA-CA-5796	377	0	T3	N0	M0	Stage IIA	NA			52	Ascending Colon	TCGA-CA-5796	65ab030d-39f2-48ab-80ac-90cb1faa823a	Not Available	Not Available	Not Available	Not Available	2	-19353	Not Applicable	0	12	Not Available	NA	TCGA-CA-5796-D70884;TCGA-CA-5796-D70885;TCGA-CA-5796-D70887	92A15186-B406-49DF-A981-9E54C965CEB6;1B08A697-B28B-4C55-A3F5-C60EDC93DF2E;5D7CAFE8-C18A-445B-9AB4-094EB5D34245	Not Available;Not Available;Not Available	10;10;10	183;183;183	30;30;30	oxaliplatin;5-Fluorouracil;Folinic Acid	Complete Response;Complete Response;Complete Response	3;3;3	Not Available;Not Available;Not Available	Not Available;Not Available;Not Available	Not Available;Not Available;Not Available	Not Available;Not Available;Not Available	Not Applicable;Not Applicable;Not Applicable	Not Available;Not Available;Not Available	Not Available;Not Available;Not Available	NO;NO;NO	Chemotherapy;Chemotherapy;Chemotherapy	Not Available;Not Available;Not Available	Not Available;Not Available;Not Available	Not Available;Not Available;Not Available	NO;NO;NO	2015;2015;2015	NOT HISPANIC OR LATINO	NA
TCGA-A6-6140	734	0	T3	N0	M0	Stage IIA	NA			62	Descending Colon	TCGA-A6-6140	21ddbfaa-1b21-4a2b-be2c-237dd69b20ff	NO	Not Available	Not Available	NO	14	-22835	Not Applicable	0	125	Not Available	NA	TCGA-A6-6140-D20354;TCGA-A6-6140-D20356;TCGA-A6-6140-D20355	ba8de936-a9ae-4858-ba46-6e682ed17c82;25c8886e-fa04-4b3a-ab0a-ed022afa6405;555b9c92-b76f-4e07-8f57-cde03e8e773d	Not Available;Not Available;Not Available	9;9;9	181;188;188	34;34;34	Oxaliplatin;Leucovorin;Fluorouracil	Not Available;Not Available;Not Available	1;1;1	3;3;3	83-163;50-175;720-960	mg;mg;mg	ADJUVANT;ADJUVANT;ADJUVANT	Not Applicable;Not Applicable;Not Applicable	1;1;1	IV;IV;IV	NO;NO;NO	Chemotherapy;Other, specify in notes;Chemotherapy	Not Available;Ancillary;Not Available	985;1525;13801	mg;mg;mg	Not Available;Not Available;Not Available	2012;2012;2012	NOT HISPANIC OR LATINO	NA
TCGA-SS-A7HO	1829	0	T4a	N0	M0	Stage IIB	NA			44	Cecum	TCGA-SS-A7HO	8D0FA506-3F51-4108-8427-7DABF270BCD4	NO	Not Available	1	NO	31	-16416	Not Applicable	0	1829	Not Available	NA	TCGA-SS-A7HO-D71978;TCGA-SS-A7HO-D71979;TCGA-SS-A7HO-D71980	55A13292-9E26-4AFA-8FCF-9772EE2C47E2;6E855AC1-15F0-41DD-995C-21AA794684C2;056AC44F-3B85-41FF-9157-7475F0735646	Not Available;Not Available;Not Available	31;31;31	93;93;93	37;37;37	Oxaliplatin;5-FU;Leucovorin	Complete Response;Complete Response;Complete Response	3;3;3	Not Available;Not Available;Not Available	Not Available;Not Available;Not Available	Not Available;Not Available;Not Available	Not Available;Not Available;Not Available	Not Applicable;Not Applicable;Not Applicable	Not Available;Not Available;Not Available	Not Available;Not Available;Not Available	NO;NO;NO	Chemotherapy;Chemotherapy;Ancillary	Not Available;Not Available;Not Available	Not Available;Not Available;Not Available	Not Available;Not Available;Not Available	NO;NO;NO	2015;2015;2015	NOT HISPANIC OR LATINO	NA
TCGA-AZ-6599	206	1	T2	N0	MX	Stage I	NA			72	Cecum	TCGA-AZ-6599	fbb69964-f962-4b89-b59b-dd05f8faf61a	Not Available	Not Available	Not Available	Not Available	29	-26438	206	0	Not Available	Not Available	NA																								NOT HISPANIC OR LATINO	NA
TCGA-AY-A71X	588	0	T2	N0	M0	Stage I	NA			54	Cecum	TCGA-AY-A71X	D4DA3298-3A02-44A6-BDCD-D260F38E520B	NO	Not Available	Not Available	YES	9	-19904	Not Applicable	0	235	Not Available	NA																								NOT HISPANIC OR LATINO	NA
TCGA-AA-3713	579	0	T3	N0	M1	Stage IV	NA			68	Ascending Colon	TCGA-AA-3713	57a2044d-20cc-4d02-b268-ce570a0fabe3	Not Available	Not Available	Not Available	Not Available	18	-24927	Not Applicable	0	30	Not Available	NA	TCGA-AA-3713-D37500	9597EA4B-6886-4161-8F9B-825AF0C1FD21	Not Available	3	456	244	5-Fluorouracil	Partial Response	12	Not Available	Not Available	Not Available	Not Available	Not Applicable	Not Available	Not Available	NO	Chemotherapy	Not Available	Not Available	Not Available	NO	2012	Not Available	NA
TCGA-G4-6293	4051	0	T3	N1	M0	Stage III	NA			49	Transverse Colon	TCGA-G4-6293	27d9c162-11bb-48fb-a41a-aa05fcb4c1c2	NO	Not Available	Not Available	YES	27	-18076	Not Applicable	0	3203	Not Available	NA	TCGA-G4-6293-D21800	b280e2a2-cbfb-45dd-9277-bb4a0c42f558	Not Available	19	235	25	Fluorouracil	Not Available	1	4	500	mg/m2	ADJUVANT	Not Applicable	1	IV	NO	Chemotherapy	Not Available	2000	mg/m2	Not Available	2012	NOT HISPANIC OR LATINO	NA
TCGA-F4-6856	1074	0	T2	N0	M0	Stage I	NA			45	Cecum	TCGA-F4-6856	64bd568d-0509-48fe-8d0a-aef2a85d5c57	NO	Not Available	Not Available	Not Available	7	-16519	Not Applicable	0	20	Not Available	NA	TCGA-F4-6856-D63483;TCGA-F4-6856-D63488	033361EE-254A-46F4-99D4-61E8F52D027B;62D6AB27-A225-4519-9D76-92ACDD34CADF	Not Available;Not Available	11;11	41;41	11;11	Leucovorin;5-Fluorouracil	Complete Response;Complete Response	8;8	Not Available;Not Available	Not Available;Not Available	Not Available;Not Available	Not Available;Not Available	Not Applicable;Not Applicable	Not Available;Not Available	Not Available;Not Available	NO;NO	Ancillary;Chemotherapy	Not Available;Not Available	Not Available;Not Available	Not Available;Not Available	NO;NO	2014;2014	NOT HISPANIC OR LATINO	NA
TCGA-DM-A1HA	2600	0	T3	N2	M0	Stage IIIC	NA			82	Ascending Colon	TCGA-DM-A1HA	56c8b812-ca8e-4eb2-b0fe-f264316789bf	YES	Normal	Not Available	YES	Not Available	-30272	Not Applicable	0	2600	2600	NA																								NOT HISPANIC OR LATINO	NA
TCGA-5M-AAT6	290	1	T4a	N2b	M1a	Stage IV	NA			40	Transverse Colon	TCGA-5M-AAT6	CE00896A-F7D2-4123-BB95-24CB6E53FC32	Not Available	Not Available	Not Available	YES	27	-14852	290	0	Not Available	Not Available	NA																								HISPANIC OR LATINO	NA
TCGA-CM-5860	974	0	T3	N0	M0	Stage IIA	NA			44	Ascending Colon	TCGA-CM-5860	96e013d9-8e89-46a7-8d07-bae95af36708	NO	Not Available	Not Available	NO	11	-16344	Not Applicable	0	304	Not Available	NA	TCGA-CM-5860-D15254;TCGA-CM-5860-D15257;TCGA-CM-5860-D15258;TCGA-CM-5860-D15253	4ba86384-0a23-4be8-8325-35f6d8b205df;adf45a83-5b88-431b-b19c-a7c9ef785048;a83b56b5-b668-4477-b60c-6df4812fea50;615d6a0c-5eb5-45db-9971-0001fd1f9cd8	Not Available;Not Available;Not Available;Not Available	15;15;15;15	211;211;211;197	57;57;57;57	Leucovorin;Fluorouracil;Fluorouracil;Oxaliplatin	Not Available;Not Available;Not Available;Not Available	8;8;8;8	12;12;12;11	850;850;2602.17;180	mg;mg;mg;mg	ADJUVANT;ADJUVANT;ADJUVANT;ADJUVANT	Not Applicable;Not Applicable;Not Applicable;Not Applicable	1;1;1;1	IV;IV;IV;IV	NO;NO;NO;NO	Other, specify in notes;Chemotherapy;Chemotherapy;Chemotherapy	Ancillary agent;Not Available;Not Available;Not Available	7680;9800;30402.17;1940	mg;mg;mg;mg	Not Available;Not Available;Not Available;Not Available	2011;2011;2011;2011	NOT HISPANIC OR LATINO	NA
TCGA-A6-A56B	1711	1	T3	N1	M0	Stage IIIB	NA			57	Sigmoid Colon	TCGA-A6-A56B	74A0264D-1D31-430D-9A88-E7334C8AA96C	NO	Not Available	15	YES	10	-20903	Not Applicable	0	1595	Not Available	NA	TCGA-A6-A56B-D42088;TCGA-A6-A56B-D42089;TCGA-A6-A56B-D42090;TCGA-A6-A56B-D42091;TCGA-A6-A56B-D42092	07E34E9E-9C88-42C3-9978-261BEA4751F6;4222D044-05CB-4518-9BAC-DB508925FB7E;0D9ACB99-4600-4500-A13E-6F8C9A486B11;06E9668D-3E5E-4CC8-A928-31E4FFE59F82;E4C65970-C55E-48AF-A90D-85AC6045F18C	Not Available;Not Available;Not Available;Not Available;Not Available	10;10;10;10;10	110;236;236;238;243	82;82;82;82;82	Fluorouracil;Leucovorin;Oxaliplatin;Fluorouracil;Cetuximab	Complete Response;Complete Response;Complete Response;Complete Response;Complete Response	4;4;4;4;4	Not Available;Not Available;Not Available;Not Available;Not Available	Not Available;Not Available;Not Available;Not Available;Not Available	Not Available;Not Available;Not Available;Not Available;Not Available	Not Available;Not Available;Not Available;Not Available;Not Available	Not Applicable;Not Applicable;Not Applicable;Not Applicable;Not Applicable	Not Available;Not Available;Not Available;Not Available;Not Available	Not Available;Not Available;Not Available;Not Available;Not Available	NO;NO;NO;NO;NO	Chemotherapy;Ancillary;Chemotherapy;Chemotherapy;Targeted Molecular therapy	Not Available;Not Available;Not Available;Not Available;Not Available	Not Available;Not Available;Not Available;Not Available;Not Available	Not Available;Not Available;Not Available;Not Available;Not Available	YES;YES;YES;YES;YES	2013;2013;2013;2013;2013	NOT HISPANIC OR LATINO	NA
TCGA-G4-6322	792	0	T3	N1	MX	Stage IIIB	NA			65	Descending Colon	TCGA-G4-6322	b3fea9bb-53f9-4ddb-922d-b570562d7a7d	NO	Not Available	Not Available	YES	13	-23825	Not Applicable	0	547	Not Available	NA	TCGA-G4-6322-D21961;TCGA-G4-6322-D21963;TCGA-G4-6322-D21962	609871f8-cee5-4029-bf5c-1f625ca7472f;9f9a389b-abde-4403-819f-44e648bcc4b2;48474a61-d438-4c32-8b45-e077144102f9	Not Available;Not Available;Not Available	30;30;30	190;190;190	36;36;36	Oxaliplatin;Leucovorin;Fluorouracil	Not Available;Not Available;Not Available	1;1;1	12;12;12	180;844;844	mg;mg;mg	ADJUVANT;ADJUVANT;ADJUVANT	Not Applicable;Not Applicable;Not Applicable	1;1;1	IV;IV;IV	NO;NO;NO	Chemotherapy;Chemotherapy;Chemotherapy	Not Available;Not Available;Not Available	2148;10096;10096	mg;mg;mg	Not Available;Not Available;Not Available	2012;2012;2012	NOT HISPANIC OR LATINO	NA
TCGA-DM-A1D8	383	1	T3	N1			NA			50	Ascending Colon	TCGA-DM-A1D8	92c043b6-8d53-4c1c-808a-c4be5e2926e6	YES	Normal	Not Available	Not Available	Not Available	-18311	383	0	383	383	NA																								NOT HISPANIC OR LATINO	NA
TCGA-A6-6137	824	0	T3	N1c	M0	Stage IIIB	NA			55	Hepatic Flexure	TCGA-A6-6137	326c1637-ea91-4006-b440-d38420af1ae5	NO	Not Available	Not Available	NO	14	-20095	Not Applicable	0	195	Not Available	NA	TCGA-A6-6137-D18041;TCGA-A6-6137-D18039;TCGA-A6-6137-D18042	49b125ba-8d58-4fcc-8642-e6904a9d2eea;2c4dc053-3db9-4821-8c56-1a278c580100;2b2b0da3-33bf-4d8f-bb44-a404410e818d	Not Available;Not Available;Not Available	3;3;3	218;211;218	28;28;28	Fluorouracil;Oxaliplatin;Leucovorin	Not Available;Not Available;Not Available	11;11;11	3;3;3	1000-1070;177-182;50-200	mg;mg;mg	ADJUVANT;ADJUVANT;ADJUVANT	Not Applicable;Not Applicable;Not Applicable	1;1;1	IV;IV;IV	NO;NO;NO	Chemotherapy;Chemotherapy;Other, specify in notes	Not Available;Not Available;Ancillary	18070;1619;1450	mg;mg;mg	Not Available;Not Available;Not Available	2011;2011;2011	NOT HISPANIC OR LATINO	NA
TCGA-D5-6931	365	0	T4b	N2	M0	Stage IIIC	NA			77	Transverse Colon	TCGA-D5-6931	5d66191d-da49-4d7e-89a4-a382db338340	NO	Not Available	Not Available	NO	21	-28292	Not Applicable	0	43	Not Available	NA																								NOT HISPANIC OR LATINO	NA
TCGA-G4-6628	2424	0	T2	N0	M0	Stage I	NA			78	Cecum	TCGA-G4-6628	2c0a725a-e829-4d84-89d9-d0d47f6cfa37	NO	Not Available	Not Available	YES	2	-28772	Not Applicable	0	1606	Not Available	NA																								NOT HISPANIC OR LATINO	NA
TCGA-G4-6314	1093	0	T3	N2	M1	Stage IV	NA			76	Cecum	TCGA-G4-6314	abe658e0-33f9-4f57-849b-dec4d20964d6	YES	Normal	Not Available	YES	13	-27958	Not Applicable	0	1031	Not Available	NA	TCGA-G4-6314-D21814;TCGA-G4-6314-D21821;TCGA-G4-6314-D21817;TCGA-G4-6314-D21815;TCGA-G4-6314-D21810;TCGA-G4-6314-D21822;TCGA-G4-6314-D21819;TCGA-G4-6314-D21813	e59c220a-3767-418d-a106-a86a8ac11057;6b644f7b-34e8-4860-ab40-d199dd3202cd;cf59cdd0-7a94-4432-90cf-15a5b6c41bc2;7e1069d3-9265-49bc-a9dd-2004971ed7bb;17ca7309-e359-4399-9b2f-67b7fbe11468;1b0ba903-4ca7-483f-bf97-9e3138b7afdc;25e50ae8-9511-4f12-b1c4-73a2e8b2b2cc;d2536ed5-5f4a-4cda-a592-2ff4aac998f2	Not Available;Not Available;Not Available;Not Available;Not Available;Not Available;Not Available;Not Available	9;9;9;9;9;9;9;9	209;1045;561;561;209;1045;561;181	103;954;337;337;48;954;337;48	Fluorouracil;Cetuximab;Leucovorin;Bevacizumab;Leucovorin;Irinotecan;Irinotecan;Oxaliplatin	Not Available;Not Available;Not Available;Not Available;Not Available;Not Available;Not Available;Not Available	2;2;2;2;2;2;2;2	8;7;17;17;12;7;17;10	752;825;740;386;756;165;240;160	mg;mg;mg;mg;mg;mg;mg;mg	ADJUVANT;PROGRESSION;PROGRESSION;PROGRESSION;ADJUVANT;PROGRESSION;PROGRESSION;ADJUVANT	Not Applicable;Not Applicable;Not Applicable;Not Applicable;Not Applicable;Not Applicable;Not Applicable;Not Applicable	2;4;3;3;1;4;3;1	IV;IV;IV;IV;IV;IV;IV;IV	NO;NO;NO;NO;NO;NO;NO;NO	Chemotherapy;Chemotherapy;Chemotherapy;Chemotherapy;Chemotherapy;Chemotherapy;Chemotherapy;Chemotherapy	Not Available;Not Available;Not Available;Not Available;Not Available;Not Available;Not Available;Not Available	6000;5765;12464;6404;8976;1085;3874;1577	mg;mg;mg;mg;mg;mg;mg;mg	Not Available;Not Available;Not Available;Not Available;Not Available;Not Available;Not Available;Not Available	2012;2012;2012;2012;2012;2012;2012;2012	NOT HISPANIC OR LATINO	NA
TCGA-AA-3697	2587	0	T3	N0	M0	Stage II	NA			77	Sigmoid Colon	TCGA-AA-3697	dde411b2-5d2b-4638-8149-89bc1eb3c7ad	NO	Not Available	Not Available	Not Available	18	-28367	Not Applicable	0	30	Not Available	NA																								Not Available	NA
TCGA-A6-6780	612	0	T3	N0	MX	Stage IIA	NA	FPPP	TCGA	74	Discrepancy	TCGA-A6-6780	88832340-46ad-449c-8f81-6a8e5b495510	NO	Not Available	Not Available	NO	11	-27250	Not Applicable	0	87	Not Available	NA																								NOT HISPANIC OR LATINO	NA
TCGA-AD-6889	2532	1	T3	N0	M0	Stage IIA	NA			76	Ascending Colon	TCGA-AD-6889	955464c8-9c62-430c-87b8-107db5c980a8	NO	Not Available	Not Available	Not Available	12	Not Available	Not Applicable	0	1720	Not Available	NA	TCGA-AD-6889-D47707	2285FF7F-F87C-4232-BE93-94606723E640	Not Available	28	Not Available	42	Xeloda	Complete Response	8	Not Available	Not Available	Not Available	Not Available	Not Applicable	Not Available	Not Available	NO	Chemotherapy	Not Available	Not Available	Not Available	YES	2013	Not Available	NA
TCGA-F4-6703	1456	0	T3	N0	M0	Stage IIA	NA			64	Ascending Colon	TCGA-F4-6703	0c53b010-4243-4da3-a059-7f54c9a850ec	Not Available	Not Available	Not Available	NO	23	-23644	Not Applicable	0	56	Not Available	NA																								NOT HISPANIC OR LATINO	NA
TCGA-A6-6648	766	0	T3	N0	M1a	Stage IVA	NA			56	Discrepancy	TCGA-A6-6648	65056295-8fcd-4f82-a3c9-a5acd79521fe	NO	Not Available	Not Available	NO	16	-20641	Not Applicable	0	253	Not Available	NA	TCGA-A6-6648-D17990;TCGA-A6-6648-D17991;TCGA-A6-6648-D17989;TCGA-A6-6648-D17992	999f6885-13bd-4180-ac46-94bb3a6e01e1;4786b23e-8b48-48c6-bfee-d431500e366a;a356522b-2132-46f8-a9d8-7c380201e8ba;186076eb-7755-4b35-8e49-fd1156a8beea	Not Available;Not Available;Not Available;Not Available	1;1;1;1	91;91;77;93	63;63;63;63	Oxaliplatin;Leucovorin;Cetuximab Study drug;5 FU	Not Available;Not Available;Not Available;Not Available	11;11;11;11	1;1;1;1	180;840-850;1050;6300	mg;mg;mg;mg	OTHER, SPECIFY IN NOTES;OTHER, SPECIFY IN NOTES;OTHER, SPECIFY IN NOTES;OTHER, SPECIFY IN NOTES	Metastatic;Metastatic;Metastatic;Metastatic	1;1;1;1	IV;IV;IV;IV	NO;NO;NO;NO	Discrepancy;Discrepancy;Discrepancy;Discrepancy	Discrepancy;Discrepancy;Discrepancy;Discrepancy	540;2540;Not Available;18900	mg;mg;mg;mg	Not Available;Not Available;Not Available;Not Available	2011;2011;2011;2011	NOT HISPANIC OR LATINO	NA
TCGA-DM-A288	427	1	T3	N2	M0	Stage IIIC	NA			68	Cecum	TCGA-DM-A288	143F2DD6-A280-41C5-9242-442EF91B73EC	NO	Not Available	Not Available	Not Available	27	-25084	427	0	427	Not Available	NA																								NOT HISPANIC OR LATINO	NA
TCGA-AZ-6601	3042	1	T3	N0	M0	Stage II	NA			68	Sigmoid Colon	TCGA-AZ-6601	7ad0617e-bc4a-4869-8419-744f04d9b7a3	Not Available	Not Available	Not Available	Not Available	15	-25082	3042	0	Not Available	Not Available	NA																								NOT HISPANIC OR LATINO	NA
TCGA-DM-A1HB	4126	0	T3	N1	M0	Stage IIIB	NA			75	Transverse Colon	TCGA-DM-A1HB	8C0894FB-5E78-40AE-BE0B-329CA30F758A	YES	Abnormal	Not Available	NO	Not Available	-27708	Not Applicable	0	3786	3786	NA																								NOT HISPANIC OR LATINO	NA
TCGA-A6-2686	1126	1	T3	N0	M0	Stage IIA	NA			81	Cecum	TCGA-A6-2686	19d1a5fc-3ce9-4e43-a364-a4150bcf911b	NO	Not Available	Not Available	NO	19	-29623	Not Applicable	0	488	Not Available	NA																								NOT HISPANIC OR LATINO	NA
TCGA-D5-6926	275	0	T4a	N1	M0	Stage IIIB	NA			65	Sigmoid Colon	TCGA-D5-6926	3a8ca50f-bc9f-4250-8c8d-22893763ea46	NO	Not Available	Not Available	NO	18	-23768	Not Applicable	0	95	Not Available	NA	TCGA-D5-6926-D29710	b896f753-4ea9-43d6-a893-529e05927fbb	Not Available	28	196	42	5-Fluorouracil + leucovorin	Not Available	3	6	Not Available	mg/m2	ADJUVANT	Not Applicable	Not Available	IV	NO	Chemotherapy	Not Available	Not Available	mg	Not Available	2012	NOT HISPANIC OR LATINO	NA
TCGA-D5-6530	621	0	T2	N0	M0	Stage I	NA			53	Discrepancy	TCGA-D5-6530	f89bbd17-c732-4847-b71c-a8627a702747	NO	Not Available	40	NO	9	-19591	Not Applicable	0	271	Not Available	NA																								NOT HISPANIC OR LATINO	NA
TCGA-CA-5254	386	0	T3	N0	M0	Stage IIA	NA			42	Transverse Colon	TCGA-CA-5254	26a41625-4680-47b2-afa9-6a72b148e1c0	Not Available	Not Available	Not Available	Not Available	8	-15415	Not Applicable	0	5	Not Available	NA	TCGA-CA-5254-D70898;TCGA-CA-5254-D70899;TCGA-CA-5254-D70900	6190AB74-8B52-4AE1-AE80-30570CA4BD5A;B70702AA-8E86-45A0-BF1D-43057580E3D6;7C8A2022-E668-46AD-A54F-04CFC91BA4D1	Not Available;Not Available;Not Available	10;10;10	204;204;204	50;50;50	oxaliplatin;5-Fluorouracil;Folinic Acid	Complete Response;Complete Response;Complete Response	3;3;3	Not Available;Not Available;Not Available	Not Available;Not Available;Not Available	Not Available;Not Available;Not Available	Not Available;Not Available;Not Available	Not Applicable;Not Applicable;Not Applicable	Not Available;Not Available;Not Available	Not Available;Not Available;Not Available	NO;NO;NO	Chemotherapy;Chemotherapy;Chemotherapy	Not Available;Not Available;Not Available	Not Available;Not Available;Not Available	Not Available;Not Available;Not Available	NO;NO;NO	2015;2015;2015	NOT HISPANIC OR LATINO	NA
TCGA-D5-6928	354	0	T3	N0	M0	Stage IIA	NA			80	Ascending Colon	TCGA-D5-6928	eecaa5cd-0b69-4af2-a782-035025f207b6	NO	Not Available	65	NO	18	-29411	Not Applicable	0	20	Not Available	NA																								NOT HISPANIC OR LATINO	NA
TCGA-CM-6169	396	0	T3	N0	M0	Stage IIA	NA			67	Cecum	TCGA-CM-6169	8e87ddca-f43e-4c6f-9d5b-430b666a7f6c	NO	Not Available	Not Available	NO	19	-24564	Not Applicable	0	243	Not Available	NA	TCGA-CM-6169-D15236;TCGA-CM-6169-D15240;TCGA-CM-6169-D15238;TCGA-CM-6169-D15215	7997d2ef-1c60-43b9-9096-e0c4fe13dea2;bcc4b8af-2a42-4ea6-b631-67417436a9e2;11bdf997-2b4c-4fd3-a358-3621721d4fa8;d843573b-abb6-4375-b320-65b6e417f688	Not Available;Not Available;Not Available;Not Available	15;15;15;15	243;243;243;159	89;89;89;89	Leucovorin;Fluorouracil;Fluorouracil;Oxaliplatin	Not Available;Not Available;Not Available;Not Available	8;8;8;8	12;12;12;6	850;2600;850;180	mg;mg;mg;mg	ADJUVANT;ADJUVANT;ADJUVANT;ADJUVANT	Not Applicable;Not Applicable;Not Applicable;Not Applicable	1;1;1;1	IV;IV;IV;IV	NO;NO;NO;NO	Other, specify in notes;Chemotherapy;Chemotherapy;Chemotherapy	Ancillary agent;Not Available;Not Available;Not Available	7050;31200;10200;1080	mg;mg;mg;mg	Not Available;Not Available;Not Available;Not Available	2011;2011;2011;2011	NOT HISPANIC OR LATINO	NA
TCGA-CA-6716	371	0	T3	N0	M0	Stage IIA	NA			65	Ascending Colon	TCGA-CA-6716	95a54459-3fac-42d5-8ec1-ed66d971d64d	Not Available	Not Available	Not Available	Not Available	8	-23943	Not Applicable	0	8	Not Available	NA	TCGA-CA-6716-D70865;TCGA-CA-6716-D70867;TCGA-CA-6716-D70869	5685C16B-388E-4342-84D9-0156CCCC3F43;5260D8B7-8E40-4BB5-BA69-A1C26F5C97F2;1824EB06-30F9-4726-A683-F2313A935926	Not Available;Not Available;Not Available	10;10;10	226;226;226	42;42;42	oxaliplatin;5-Fluorouracil;Folinic Acid	Complete Response;Complete Response;Complete Response	3;3;3	Not Available;Not Available;Not Available	Not Available;Not Available;Not Available	Not Available;Not Available;Not Available	Not Available;Not Available;Not Available	Not Applicable;Not Applicable;Not Applicable	Not Available;Not Available;Not Available	Not Available;Not Available;Not Available	NO;NO;NO	Chemotherapy;Chemotherapy;Chemotherapy	Not Available;Not Available;Not Available	Not Available;Not Available;Not Available	Not Available;Not Available;Not Available	NO;NO;NO	2015;2015;2015	NOT HISPANIC OR LATINO	NA
TCGA-CM-6161	457	0	T2	N0	M0	Stage I	NA			36	Sigmoid Colon	TCGA-CM-6161	3470b1af-689f-467a-9f9e-de74088f9b94	NO	Not Available	Not Available	YES	19	-13363	Not Applicable	0	212	Not Available	NA																								NOT HISPANIC OR LATINO	NA
TCGA-AD-6899	176	1	T4a	N2b	MX	Stage IIIC	NA			84	Cecum	TCGA-AD-6899	ea923671-3903-4a79-830d-e7e4b1eabab0	Not Available	Not Available	1	NO	25	-30693	Not Applicable	0	48	Not Available	NA																								Not Available	NA
TCGA-A6-6652	751	0	T3	N0	M1	Stage IVA	NA			59	Sigmoid Colon	TCGA-A6-6652	96ac1f4b-79b0-4517-8caf-fc05abcaaf4f	NO	Not Available	Not Available	YES	15	-21638	Not Applicable	0	135	Not Available	NA	TCGA-A6-6652-D30459;TCGA-A6-6652-D30908;TCGA-A6-6652-D30907;TCGA-A6-6652-D30909;TCGA-A6-6652-D30910	8eac1749-f057-4382-af62-127ed368dd65;c13ce170-4baf-4507-9eda-d0f4897f8151;3a8d9c47-535d-49bc-8901-149af8ad9273;f0c12b8f-7c6f-4be3-8c5e-c2e71bf85879;2cfdae08-2b02-48d5-b9ea-12f073efa831	Not Available;Not Available;Not Available;Not Available;Not Available	18;18;19;19;19	Not Available;Not Available;254;Not Available;Not Available	86;86;86;86;86	Cetuximab;Leucovorin;Oxaliplatin;Fluorouracil;Fluorouracil	Not Applicable;Not Applicable;Stable Disease;Not Applicable;Not Applicable	4;4;4;4;4	Not Available;Not Available;Not Available;Not Available;Not Available	Not Available;Not Available;Not Available;Not Available;Not Available	Not Available;Not Available;Not Available;Not Available;Not Available	Not Available;Not Available;Not Available;Not Available;Not Available	Not Applicable;Not Applicable;Not Applicable;Not Applicable;Not Applicable	Not Available;Not Available;Not Available;Not Available;Not Available	Not Available;Not Available;Not Available;Not Available;Not Available	YES;YES;NO;YES;YES	Targeted Molecular therapy;Ancillary;Chemotherapy;Chemotherapy;Chemotherapy	Not Available;Not Available;Not Available;Not Available;Not Available	Not Available;Not Available;Not Available;Not Available;Not Available	Not Available;Not Available;Not Available;Not Available;Not Available	YES;YES;YES;YES;YES	2012;2012;2012;2012;2012	NOT HISPANIC OR LATINO	NA
TCGA-D5-6531	540	0	T3	N0	M0	Stage IIA	NA			75	Hepatic Flexure	TCGA-D5-6531	e4c0d890-a634-48bd-9108-e674532b0d2e	Not Available	Not Available	Not Available	Not Available	13	-27633	Not Applicable	0	17	Not Available	NA																								NOT HISPANIC OR LATINO	NA
TCGA-A6-6654	726	0	T3	N1	M0	Stage IIIB	NA			65	Descending Colon	TCGA-A6-6654	81e7cca8-2d71-4446-9692-872c2fe68d0a	NO	Not Available	Not Available	Not Available	16	-23953	Not Applicable	0	178	Not Available	NA	TCGA-A6-6654-D29549;TCGA-A6-6654-D29785;TCGA-A6-6654-D29787;TCGA-A6-6654-D29786	85858a5a-2a25-49e2-964e-5508bef1349c;4904bd04-a129-4cfa-9261-34f59d0ab226;f603532b-fd11-437c-ac3b-3467cf35c2ef;a044ff74-4c3b-4a2e-b545-074c96ff4752	Not Available;Not Available;Not Available;Not Available	22;28;28;28	276;290;292;290	136;136;136;136	Oxaliplatin;Leucovorin;5 FU;5 FU	Not Available;Not Available;Not Available;Not Available	3;3;3;3	11;12;12;12	80-180;350-850;4800-5100;800-850	mg;mg;mg;mg	ADJUVANT;ADJUVANT;ADJUVANT;ADJUVANT	Not Applicable;Not Applicable;Not Applicable;Not Applicable	1;1;1;1	IV;IV;IV;IV	NO;NO;NO;NO	Chemotherapy;Other, specify in notes;Chemotherapy;Chemotherapy	Not Available;Ancillary;Not Available;Not Available	1640;6100;60300;10050	mg;mg;mg;mg	Not Available;Not Available;Not Available;Not Available	2012;2012;2012;2012	NOT HISPANIC OR LATINO	NA
TCGA-NH-A8F7	543	0	T3	N0	MX	Stage IIA	NA			53	Sigmoid Colon	TCGA-NH-A8F7	6454FF0C-26F8-4CC2-B77C-7E5ABDC20ACD	NO	Not Available	Not Available	NO	19	-19535	Not Applicable	0	158	Not Available	NA	TCGA-NH-A8F7-D56709;TCGA-NH-A8F7-D56710;TCGA-NH-A8F7-D56711;TCGA-NH-A8F7-D67148;TCGA-NH-A8F7-D67149	F230456E-0328-4F0F-95A1-8D60F7CEA832;F0209F5E-3A9E-49B9-9A3B-9896B8E2E4C6;28D39D44-463B-4B21-A04E-B6C5ABD0A0DD;DA840463-6BA2-4192-ADCD-5837BB952757;F3DB5B7D-5099-444B-B993-6B84A5F90C3A	Not Available;Not Available;Not Available;Not Available;Not Available	19;19;19;31;31	228;228;249;Not Available;397	74;74;74;245;334	FLUOROURACIL;OXALIPLATIN;BEVACIZUMAB;XELODA;BEVACIZUMAB	Partial Response;Partial Response;Partial Response;Not Applicable;Unknown	2;2;2;10;10	Not Available;Not Available;Not Available;Not Available;Not Available	Not Available;Not Available;Not Available;Not Available;Not Available	Not Available;Not Available;Not Available;Not Available;Not Available	Not Available;Not Available;Not Available;Not Available;Not Available	Not Applicable;Not Applicable;Not Applicable;Not Applicable;Not Applicable	Not Available;Not Available;Not Available;Not Available;Not Available	Not Available;Not Available;Not Available;Not Available;Not Available	NO;NO;NO;YES;NO	Chemotherapy;Chemotherapy;Immunotherapy;Chemotherapy;Immunotherapy	Not Available;Not Available;Not Available;Not Available;Not Available	Not Available;Not Available;Not Available;Not Available;Not Available	Not Available;Not Available;Not Available;Not Available;Not Available	NO;NO;NO;NO;NO	2014;2014;2014;2014;2014	NOT HISPANIC OR LATINO	NA
TCGA-A6-2685	1133	0	T3	N0	M0	Stage IIA	NA			48	Sigmoid Colon	TCGA-A6-2685	e5921d6b-51cf-44be-b295-610cf7c3a69a	NO	Not Available	Not Available	NO	2	-17757	Not Applicable	0	464	Not Available	NA																								NOT HISPANIC OR LATINO	NA
TCGA-AD-A5EK	500	0	T2	N0	MX	Stage I	NA			51	Ascending Colon	TCGA-AD-A5EK	E8EC26BD-C88D-42B9-AC8A-AB121B8140F8	NO	Not Available	15	YES	12	-18731	Not Applicable	0	13	Not Available	NA																								NOT HISPANIC OR LATINO	NA
TCGA-CA-6717	388	0	T3	N0	M0	Stage IIA	NA			57	Ascending Colon	TCGA-CA-6717	268c01b3-d2ce-44c0-a2fe-ea846a1253cc	Not Available	Not Available	Not Available	Not Available	8	-20984	Not Applicable	0	10	Not Available	NA	TCGA-CA-6717-D70860;TCGA-CA-6717-D70861;TCGA-CA-6717-D70862	0CBC9366-A33A-4693-8D94-0F35F6A6D07B;885F39FF-3425-4DF0-9AA1-21700116EE9A;9D0EF700-AC63-4DFE-A616-CF5C42039D73	Not Available;Not Available;Not Available	10;10;10	318;318;318	128;128;128	oxaliplatin;5-Fluorouracil;Folinic Acid	Complete Response;Complete Response;Complete Response	3;3;3	Not Available;Not Available;Not Available	Not Available;Not Available;Not Available	Not Available;Not Available;Not Available	Not Available;Not Available;Not Available	Not Applicable;Not Applicable;Not Applicable	Not Available;Not Available;Not Available	Not Available;Not Available;Not Available	NO;NO;NO	Chemotherapy;Chemotherapy;Chemotherapy	Not Available;Not Available;Not Available	Not Available;Not Available;Not Available	Not Available;Not Available;Not Available	NO;NO;NO	2015;2015;2015	NOT HISPANIC OR LATINO	NA
TCGA-CM-6170	457	0	T2	N0	M0	Stage I	NA			73	Descending Colon	TCGA-CM-6170	9d8c4693-8e36-473b-bb34-a7cdc04dd223	NO	Not Available	Not Available	YES	19	-26663	Not Applicable	0	242	Not Available	NA																								NOT HISPANIC OR LATINO	NA
TCGA-D5-6541	474	0	T3	N0	M0	Stage IIA	NA			49	Splenic Flexure	TCGA-D5-6541	39aec099-a33e-47a4-a602-cbf65ddd3830	NO	Not Available	30	Not Available	16	-18029	Not Applicable	0	108	Not Available	NA																								NOT HISPANIC OR LATINO	NA
TCGA-AY-6386	542	0	T3	N1a	M0	Stage IIIB	NA			66	Cecum	TCGA-AY-6386	35c9264f-34ec-4d75-ab80-aaac86108fc8	NO	Not Available	Not Available	YES	1	-24453	Not Applicable	0	169	Not Available	NA	TCGA-AY-6386-D21745;TCGA-AY-6386-D21748;TCGA-AY-6386-D21747	dcd152ef-7b0f-4554-8701-587498c2fb1b;beee8dab-75b8-4e6b-a1a8-bd422660278c;9cf53d79-7012-4ee9-bd20-adcaaa841a4c	Not Available;Not Available;Not Available	20;20;20	246;246;246	73;73;73	5FU;Oxaliplatin;Leucovorin	Not Available;Not Available;Not Available	2;2;2	12;12;12	2800;85;200	mg/m2;mg/m2;mg/m2	ADJUVANT;ADJUVANT;ADJUVANT	Not Applicable;Not Applicable;Not Applicable	1;1;1	IV;IV;IV	NO;NO;NO	Chemotherapy;Chemotherapy;Other, specify in notes	Not Available;Not Available;Ancillary agent	Not Available;Not Available;Not Available	Not Available;Not Available;Not Available	Not Available;Not Available;Not Available	2012;2012;2012	NOT HISPANIC OR LATINO	NA
TCGA-DM-A1D9	4270	0	T3	N0	M0	Stage IIA	NA			67	Cecum	TCGA-DM-A1D9	e3b6018c-ab2c-47c5-b183-a295d0110835	NO	Not Available	Not Available	YES	Not Available	-24514	Not Applicable	0	3920	3920	NA																								NOT HISPANIC OR LATINO	NA
TCGA-G4-6309	2600	0	T3	N1	M0	Stage IIIB	NA			40	Sigmoid Colon	TCGA-G4-6309	e4be17c8-0855-432c-bb80-28bb24b62f32	NO	Not Available	Not Available	YES	2	-14729	Not Applicable	0	1386	Not Available	NA	TCGA-G4-6309-D21947	0104d92b-90fe-42c8-9f02-dd916ce7b46f	Not Available	6	254	73	Xeloda	Not Available	2	8	3600	mg/day	ADJUVANT	Not Applicable	1	PO	NO	Chemotherapy	Not Available	355600	mg	Not Available	2012	NOT HISPANIC OR LATINO	NA
TCGA-QG-A5YX	1003	0	T3	N0	MX	Stage IIA	NA			61	Sigmoid Colon	TCGA-QG-A5YX	300FFF5A-0F61-402D-B845-3938BA7B1294	NO	Not Available	25	YES	20	-22617	Not Applicable	0	526	Not Available	NA	TCGA-QG-A5YX-D44483	07AF7F33-432C-43A3-BF5B-12A81384FB74	Not Available	20	527	42	Xeloda	Complete Response	6	Not Available	Not Available	Not Available	Not Available	Not Applicable	Not Available	Not Available	NO	Chemotherapy	Not Available	Not Available	Not Available	NO	2013	NOT HISPANIC OR LATINO	NA
TCGA-CK-6751	518	0	T2	N0	MX	Stage I	NA			88	Ascending Colon	TCGA-CK-6751	7a70f061-9a6f-408e-a416-7f5295ceba3b	NO	Not Available	Not Available	NO	Not Available	-32354	Not Applicable	0	518	Not Available	NA																								NOT HISPANIC OR LATINO	NA
[truncated: 117 more columns]
