# Supplementary material for: Molecular subtypes based on DNA methylation predict prognosis in colon adenocarcinoma patients
Source: Aging (Albany NY). 2019 Dec 18;11(24):11880–92. doi: 10.18632/aging.102492 (PMC6949097; doi:10.18632/aging.102492)
Supplement: Supplementary Table 4 [file aging-11-102492-s012..xlsx]

## Sheet: S7_Table
Supplementary Table 4. Testing dataset.
	TCGA-AA-3812-01	TCGA-AA-A01Z-01	TCGA-AA-3846-01	TCGA-AA-3693-01	TCGA-AA-3710-01	TCGA-AA-3695-01	TCGA-AA-3530-01	TCGA-AA-A02Y-01	TCGA-AA-A022-01	TCGA-AA-3956-01	TCGA-AA-3525-01	TCGA-AA-A01I-01	TCGA-AA-3520-01	TCGA-AA-3975-01	TCGA-AA-3560-01	TCGA-AA-3862-01	TCGA-AA-3673-01	TCGA-AA-3667-01	TCGA-AA-A024-01	TCGA-AA-3856-01	TCGA-AA-3561-01	TCGA-AA-3842-01	TCGA-AA-3977-01	TCGA-AA-3696-01	TCGA-AA-3968-01	TCGA-AA-3994-01	TCGA-AA-3966-01	TCGA-AA-3543-01	TCGA-AA-3972-01	TCGA-AA-3544-01	TCGA-A6-2683-01	TCGA-AA-A004-01	TCGA-A6-2674-01	TCGA-AA-3973-01	TCGA-A6-3807-01	TCGA-AA-3684-01	TCGA-AA-3841-01	TCGA-AA-3852-01	TCGA-A6-2678-01	TCGA-AA-3666-01	TCGA-AA-3818-01	TCGA-AA-3672-01	TCGA-AA-3678-01	TCGA-AA-3986-01	TCGA-AA-3989-01	TCGA-AA-3867-01	TCGA-AA-3947-01	TCGA-AA-A01F-01	TCGA-AA-3984-01
cg00000292	0.563251	0.433304	0.806618	0.596552	0.758498	0.640682	0.69043	0.553725	0.926306	0.361573	0.848549	0.734316	0.566264	0.620246	0.515295	0.650779	0.708506	0.787891	0.639461	0.559588	0.81248	0.681474	0.705168	0.500069	0.82396	0.643369	0.631889	0.888853	0.826077	0.575302	0.762243	0.779342	0.666981	0.645975	0.595087	0.698165	0.684161	0.727477	0.537115	0.326236	0.785123	0.670401	0.736515	0.572941	0.704435	0.848956	0.842606	0.625131	0.760859
cg00002426	0.294804	0.182306	0.247254	0.180786	0.881277	0.40443	0.226562	0.255953	0.925364	0.257727	0.825366	0.24472	0.199789	0.21668	0.19185	0.32732	0.226477	0.198522	0.22614	0.319719	0.168539	0.295564	0.261189	0.185938	0.406372	0.291848	0.377572	0.317269	0.174789	0.231967	0.175043	0.374954	0.4823	0.197424	0.420899	0.336357	0.237626	0.307979	0.210937	0.196495	0.205447	0.896649	0.268537	0.330951	0.315411	0.23146	0.909148	0.175718	0.331374
cg00003994	0.266123	0.314307	0.0745571	0.0561238	0.318623	0.208607	0.0988237	0.108624	0.705256	0.0855238	0.632223	0.30859	0.14934	0.0572905	0.520106	0.0677905	0.135807	0.0590405	0.0585738	0.0725738	0.29564	0.0893738	0.0597405	0.899856	0.0879738	0.212574	0.268573	0.636306	0.0795738	0.0886738	0.0613738	0.308007	0.194607	0.0592738	0.0876238	0.0875071	0.0479572	0.173257	0.0791071	0.0623072	0.0823738	0.502606	0.13079	0.190174	0.0600905	0.0607905	0.822506	0.0382739	0.0998737
cg00005847	0.759436	0.933473	0.835254	0.846046	0.599639	0.892752	0.873163	0.883955	0.775217	0.719169	0.850672	0.804056	0.853755	0.843144	0.860648	0.728511	0.848042	0.834982	0.803331	0.713547	0.899463	0.672554	0.751002	0.901368	0.814395	0.911253	0.79399	0.735222	0.86881	0.593381	0.934289	0.651967	0.443196	0.916423	0.70085	0.751274	0.740573	0.613333	0.845049	0.826276	0.843779	0.716539	0.711007	0.726515	0.824915	0.668836	0.825187	0.874886	0.695318
cg00007981	0.0256811	0.0321056	0.0419951	0.0265473	0.0515957	0.0269804	0.0387467	0.0425004	0.0356427	0.0406235	0.0394686	0.0253924	0.0222884	0.0198341	0.0217109	0.0497911	0.0273414	0.0444494	0.031095	0.0219996	0.0183903	0.0263308	0.0274136	0.033044	0.0375917	0.0465428	0.0794594	0.0264751	0.026403	0.0212056	0.0212056	0.0301566	0.0187513	0.029146	0.0259698	0.0250314	0.0385301	0.0259698	0.0199784	0.0258255	0.0244539	0.0214943	0.0228659	0.0307341	0.0261864	0.0236599	0.0258255	0.015142	0.0255367
cg00008493	0.953379	0.953831	0.962416	0.937112	0.952023	0.946149	0.94886	0.964223	0.959253	0.961512	0.970097	0.959705	0.955638	0.958801	0.964223	0.961512	0.943438	0.953379	0.969645	0.944794	0.966934	0.963771	0.95112	0.943438	0.969193	0.966934	0.962868	0.968742	0.956994	0.967386	0.962868	0.963771	0.955186	0.952475	0.959253	0.945698	0.938016	0.95609	0.960608	0.936209	0.934401	0.95112	0.949312	0.952475	0.944794	0.912713	0.962416	0.96829	0.957446
cg00008713	0.043879	0.0288713	0.0488131	0.0527192	0.0459349	0.0422343	0.0440846	0.0342165	0.0385338	0.0381226	0.0323662	0.0333941	0.031955	0.0412064	0.0348332	0.0459349	0.0488131	0.0527192	0.0381226	0.0521024	0.0340109	0.0395617	0.0370947	0.0451125	0.0368891	0.0391505	0.0461404	0.0284601	0.0432622	0.0327774	0.0356556	0.0323662	0.0305159	0.0416176	0.0430567	0.0469628	0.0549806	0.0521024	0.0358612	0.0475795	0.0432622	0.0420287	0.0541583	0.0442902	0.0442902	0.0459349	0.0407952	0.0305159	0.0516913
cg00009407	0.0296315	0.0253852	0.0307489	0.0401355	0.029855	0.0291845	0.0320898	0.0218094	0.0244912	0.0356657	0.0244912	0.0213624	0.0238208	0.0249382	0.0209154	0.0273966	0.0265026	0.0325368	0.0229268	0.028067	0.0244912	0.0287375	0.029855	0.0311959	0.0273966	0.0325368	0.019798	0.0206919	0.0320898	0.0209154	0.0249382	0.0206919	0.0200214	0.0233738	0.0352187	0.0249382	0.0332073	0.0215859	0.0251617	0.0303019	0.0336543	0.0235973	0.0314194	0.0262791	0.0265026	0.0258322	0.029855	0.019351	0.0271731
cg00011459	0.917117	0.943944	0.941812	0.933505	0.921831	0.94125	0.922168	0.909484	0.926434	0.92924	0.96168	0.964598	0.968751	0.927893	0.968976	0.936985	0.945516	0.902974	0.937434	0.93575	0.958873	0.90028	0.949108	0.899718	0.946077	0.934515	0.909596	0.961567	0.932719	0.962353	0.962016	0.953598	0.964935	0.925872	0.882657	0.933842	0.938781	0.922505	0.95719	0.872217	0.912515	0.930138	0.926658	0.919923	0.949894	0.941138	0.915994	0.972456	0.929128
cg00012199	0.0326446	0.0307384	0.0309627	0.0374662	0.0297293	0.0300657	0.0328689	0.0326446	0.0292808	0.0357842	0.0302899	0.028608	0.0317476	0.0347751	0.0296171	0.0287201	0.0287201	0.0358964	0.028608	0.0309627	0.0324204	0.0306263	0.0317476	0.0304021	0.031187	0.0309627	0.0291686	0.029505	0.032084	0.0278231	0.0325325	0.0300657	0.0284959	0.0300657	0.0309627	0.029505	0.0341023	0.0278231	0.0335417	0.0325325	0.0330931	0.0280473	0.0380268	0.0302899	0.0321961	0.028608	0.0324204	0.0282716	0.0304021
cg00012386	0.0401519	0.0302105	0.0326958	0.0268479	0.0538945	0.0303567	0.0373742	0.0325496	0.0326958	0.0360584	0.0326958	0.0329882	0.0351812	0.0280175	0.0307953	0.0473156	0.0382514	0.0299181	0.0421987	0.0286023	0.0397133	0.0499472	0.0348888	0.0385437	0.0369356	0.0402981	0.0326958	0.0265555	0.0443917	0.0315263	0.0360584	0.0391285	0.0347426	0.0408829	0.0489238	0.0360584	0.0351812	0.0391285	0.0347426	0.0359122	0.0322573	0.0309415	0.0334268	0.0433683	0.0284561	0.0338654	0.0851808	0.0237778	0.034304
cg00012792	0.068269	0.0685387	0.0852574	0.0372584	0.0550558	0.0693476	0.0731228	0.0677297	0.0642241	0.0585613	0.0555951	0.0666511	0.051011	0.030517	0.0429212	0.0693476	0.0698869	0.0688083	0.0504716	0.0386067	0.0386067	0.0712352	0.069078	0.0569434	0.0685387	0.0545165	0.0431909	0.0539772	0.0634152	0.0426516	0.0426516	0.0491234	0.058831	0.0458875	0.0914595	0.0688083	0.0469661	0.0755497	0.0550558	0.0604489	0.039955	0.0636848	0.0364495	0.0836395	0.0526289	0.0591007	0.0626062	0.0337529	0.0620669
cg00013618	0.920588	0.41707	0.507486	0.417353	0.698984	0.945127	0.423016	0.385641	0.794779	0.671896	0.534856	0.442741	0.745324	0.408387	0.362707	0.573647	0.446233	0.786002	0.413578	0.384792	0.355345	0.330429	0.493235	0.602716	0.665007	0.587426	0.57157	0.38819	0.905676	0.464354	0.622441	0.628104	0.651322	0.974668	0.836873	0.700777	0.382904	0.468224	0.442081	0.504183	0.89369	0.902656	0.62716	0.493707	0.65085	0.449631	0.41707	0.288996	0.523814
cg00014085	0.0355439	0.0318033	0.0326665	0.0398601	0.0467659	0.0395723	0.0346807	0.0323787	0.0292136	0.0395723	0.0269116	0.0240342	0.0274871	0.0361194	0.0274871	0.0318033	0.033242	0.0427375	0.0300768	0.0467659	0.0289258	0.0346807	0.0418743	0.045615	0.0303645	0.0269116	0.0246097	0.0248974	0.03094	0.02202	0.0263361	0.0266239	0.0329542	0.0318033	0.0772668	0.0326665	0.0303645	0.0318033	0.0254729	0.0312278	0.0539595	0.0349684	0.0387091	0.0398601	0.0436008	0.0286381	0.0464782	0.0194303	0.0375581
cg00015770	0.504323	0.740304	0.737259	0.554633	0.615997	0.758353	0.597046	0.476123	0.703306	0.436642	0.74414	0.706464	0.677587	0.485485	0.537487	0.629082	0.726768	0.714924	0.752261	0.127791	0.762075	0.701501	0.740869	0.776739	0.720339	0.80979	0.501842	0.723723	0.795352	0.619155	0.39547	0.618253	0.492141	0.821522	0.0693598	0.572456	0.553843	0.559822	0.798172	0.745493	0.726204	0.68334	0.552038	0.68052	0.72564	0.484357	0.75181	0.800089	0.529704
cg00016968	0.426159	0.264695	0.418976	0.307169	0.535676	0.31581	0.30009	0.334236	0.381395	0.393158	0.307794	0.453018	0.339441	0.308314	0.277604	0.517353	0.424077	0.31227	0.353599	0.36224	0.264175	0.36453	0.344126	0.280311	0.407421	0.335381	0.450519	0.411064	0.307898	0.469987	0.351413	0.661953	0.630722	0.240127	0.481854	0.465614	0.302797	0.432093	0.304046	0.298008	0.352038	0.413354	0.442191	0.486539	0.437923	0.395761	0.433655	0.335589	0.470299
cg00019495	0.109129	0.126256	0.129819	0.0513117	0.121198	0.0655649	0.0703926	0.0811975	0.0709673	0.0832665	0.0659098	0.0874045	0.0546451	0.107175	0.0828067	0.136141	0.0691282	0.0725766	0.10775	0.0656799	0.0520014	0.1489	0.109129	0.0645304	0.088439	0.137176	0.181085	0.252811	0.0809676	0.0933817	0.0668293	0.152464	0.166372	0.0706225	0.165912	0.108669	0.0946461	0.123038	0.080048	0.0685535	0.0747605	0.133728	0.0701627	0.0772893	0.0728065	0.0923472	0.146601	0.0649902	0.0722317
cg00020533	0.937247	0.903682	0.947136	0.951531	0.916069	0.939744	0.937446	0.386135	0.932152	0.892494	0.95283	0.723375	0.959723	0.895991	0.968513	0.925559	0.898987	0.928756	0.955827	0.862427	0.831859	0.824068	0.938345	0.708691	0.965916	0.964318	0.808085	0.955927	0.958224	0.794699	0.970711	0.928356	0.811881	0.954029	0.875213	0.849041	0.931053	0.904781	0.958824	0.926158	0.914871	0.948734	0.94384	0.935948	0.92486	0.847742	0.866722	0.973907	0.946637
cg00021527	0.02438	0.0195501	0.0413812	0.0189705	0.0659171	0.0239936	0.0359718	0.0247664	0.0259256	0.0334602	0.0446656	0.0205161	0.0404153	0.0319147	0.035199	0.0545186	0.036165	0.0782816	0.0228345	0.0176182	0.036165	0.0427336	0.0375173	0.0278575	0.0435064	0.0222549	0.0230277	0.0433132	0.0464043	0.0307555	0.0328806	0.0232208	0.0365514	0.0460179	0.0433132	0.0292099	0.025346	0.0238004	0.0379037	0.0276643	0.0199365	0.0266984	0.0187773	0.0537458	0.0309487	0.0340398	0.0340398	0.0120155	0.0572233
cg00022866	0.736817	0.357675	0.750361	0.64453	0.594651	0.803977	0.380654	0.391863	0.79473	0.409236	0.783241	0.402231	0.798092	0.809862	0.316576	0.688899	0.797812	0.795197	0.756806	0.692168	0.833961	0.744009	0.542342	0.830038	0.801082	0.627997	0.701602	0.345626	0.781279	0.706086	0.504139	0.769603	0.463226	0.842274	0.714119	0.625288	0.805005	0.557848	0.441275	0.68974	0.660596	0.727476	0.766988	0.368511	0.344692	0.781933	0.789966	0.863665	0.405033
cg00024396	0.0434605	0.286542	0.0426924	0.0420949	0.232685	0.0847707	0.0420095	0.0400465	0.651847	0.0423509	0.417898	0.0396197	0.0403879	0.0452529	0.0409	0.0405586	0.426604	0.0410707	0.0375713	0.044314	0.229869	0.718848	0.247878	0.0419242	0.0388515	0.729517	0.0482402	0.0459357	0.704594	0.0389369	0.0393636	0.0683832	0.0383394	0.0414121	0.0464478	0.226881	0.0460211	0.547633	0.0383394	0.0954397	0.0471306	0.360457	0.042607	0.042607	0.041156	0.0414121	0.734382	0.0355228	0.0413267
cg00024812	0.0269865	0.0264748	0.0218696	0.0263042	0.0278393	0.0237458	0.0249397	0.0240869	0.0348323	0.0208463	0.0404608	0.0205051	0.0245986	0.0235752	0.0263042	0.0249397	0.0245986	0.0254514	0.0234047	0.0285215	0.024428	0.0266453	0.0266453	0.0235752	0.0259631	0.0373907	0.0336383	0.0288626	0.0208463	0.0215285	0.024428	0.0295449	0.0266453	0.0223813	0.0213579	0.0286921	0.0234047	0.0254514	0.0305682	0.0252808	0.0350028	0.0240869	0.0254514	0.0232341	0.0203346	0.0232341	0.0239164	0.0203346	0.0237458
cg00025138	0.0185744	0.0191213	0.01584	0.0184833	0.0167515	0.0173895	0.015202	0.0120119	0.0153843	0.0310614	0.0138348	0.0151109	0.0165692	0.0181187	0.0138348	0.0175718	0.0165692	0.0177541	0.0162046	0.0190301	0.0149286	0.0154754	0.0162958	0.0198505	0.0175718	0.0182098	0.013926	0.0142905	0.0159312	0.0126499	0.0140171	0.016478	0.0144728	0.015202	0.0152931	0.0170249	0.0147463	0.0152931	0.0155666	0.0173895	0.020215	0.0198505	0.0184833	0.014564	0.0161135	0.0182098	0.0146551	0.0130145	0.014564
cg00025991	0.560728	0.45213	0.593483	0.637915	0.534793	0.684722	0.629855	0.750232	0.621382	0.59958	0.642978	0.442314	0.674803	0.634401	0.689372	0.646388	0.648041	0.667673	0.575504	0.517537	0.708075	0.650004	0.501418	0.697535	0.569925	0.720681	0.633885	0.669016	0.588834	0.552255	0.728947	0.694125	0.415346	0.72254	0.504105	0.564138	0.618799	0.517537	0.691749	0.538823	0.677799	0.722024	0.675939	0.572198	0.696295	0.642358	0.666123	0.698155	0.501625
cg00027083	0.476638	0.654699	0.223015	0.634991	0.533681	0.608945	0.21935	0.610629	0.574581	0.538632	0.59726	0.576067	0.101798	0.636675	0.604984	0.552299	0.573492	0.63509	0.657075	0.60033	-0.0483353	0.0571347	0.516449	0.332941	0.0746635	0.656976	0.64737	0.598448	0.0634728	0.588644	-0.0367484	0.547842	0.499316	0.70164	0.537543	0.482481	0.581216	0.608252	0.607955	0.192513	0.611421	0.589238	0.135272	0.503476	0.597755	0.234601	0.588545	0.64024	0.210437
cg00029826	0.0746516	0.072332	0.0808598	0.163204	0.0708994	0.0608024	0.0653733	0.0866588	0.0631902	0.11463	0.0432692	0.0408814	0.0532979	0.0599837	0.0441561	0.0855672	0.0743105	0.175894	0.043201	0.0636678	0.0708311	0.12193	0.0547988	0.0828383	0.0614846	0.0844074	0.120497	0.0422459	0.0739694	0.0460664	0.0691256	0.0414272	0.0366516	0.0518653	0.112652	0.0734918	0.0869999	0.0592333	0.0513877	0.0576642	0.0994164	0.0704218	0.110468	0.0554128	0.0616893	0.0674882	0.065578	0.041973	0.060666
cg00029931	0.426558	0.0229811	0.373521	0.423009	0.472018	0.321923	0.0220221	0.0256665	0.145167	0.0296946	0.0208712	0.0182817	0.455713	0.0173226	0.554689	0.0309414	0.455138	0.472209	0.0235566	0.0225016	0.018953	0.0384222	0.0317087	0.352038	0.373138	0.0275847	0.260255	0.0216384	0.0285437	0.0197203	0.274066	0.0397649	0.018953	0.0201998	0.250377	0.443437	0.0191449	0.0288315	0.491391	0.0261461	0.411596	0.442286	0.158498	0.0285437	0.0244197	0.031325	0.449863	0.01387	0.369205
cg00030047	0.535367	0.637031	0.720805	0.666877	0.636945	0.768283	0.769917	0.672037	0.780668	0.71487	0.768971	0.674015	0.794258	0.644256	0.751769	0.714956	0.763982	0.441529	0.784453	0.660426	0.681584	0.214806	0.649072	0.64374	0.613464	0.808622	0.768885	0.775336	0.484535	0.739383	0.139117	0.61355	0.606841	0.823502	0.238803	0.608906	0.737921	0.743684	0.162426	0.122603	0.675564	0.733879	0.692164	0.322319	0.603659	0.753489	0.802257	0.832791	0.748586
cg00031162	0.368561	0.423031	0.404439	0.469841	0.521322	0.287275	0.316613	0.349033	0.445922	0.300542	0.444334	0.306802	0.416958	0.318388	0.211502	0.43144	0.309605	0.228787	0.306429	0.276624	0.230375	0.309418	0.339597	0.332776	0.349314	0.265599	0.534776	0.477128	0.253546	0.431534	0.584388	0.578315	0.661002	0.281109	0.435178	0.347165	0.296618	0.346885	0.299982	0.279427	0.416304	0.427796	0.297179	0.309418	0.320817	0.296151	0.520668	0.56729	0.342867
cg00032227	0.0225478	0.0103503	0.0174503	0.0149016	0.0260068	0.0223657	0.0243683	0.0158119	0.0205452	0.0125349	0.0088939	0.0118067	0.0085298	0.00798364	0.00980416	0.0189067	0.0229119	0.0212734	0.0185426	0.019817	0.00561697	0.0221837	0.019635	0.0209093	0.0185426	0.0183606	0.0138093	0.00743749	0.0205452	0.00707338	0.00543492	0.0130811	0.0085298	0.0218196	0.0147196	0.0201811	0.0243683	0.0285555	0.0145375	0.0199991	0.0260068	0.0276452	0.012899	0.0201811	0.0152657	0.0145375	0.0176324	0.00270414	0.0220016
cg00033516	0.0474866	0.0190177	0.0723322	0.0459337	0.0697441	0.0640503	0.0474866	0.0235037	0.0576664	0.0590467	0.0267819	0.0340286	0.0278172	0.0342011	0.0305778	0.0454161	0.0509374	0.0795788	0.033856	0.0669835	0.0228135	0.0426555	0.0683638	0.0547332	0.0507648	0.031613	0.0335109	0.0379969	0.0495571	0.0269545	0.0350638	0.0543881	0.0266094	0.0564586	0.046969	0.0443809	0.082512	0.0640503	0.033856	0.046969	0.0680187	0.0799239	0.0416203	0.0954524	0.0386871	0.0478317	0.0340286	0.0214332	0.0799239
cg00033773	0.805735	0.838292	0.740205	0.779502	0.867221	0.820665	0.628119	0.883603	0.849076	0.854882	0.869917	0.703914	0.760112	0.798684	0.834456	0.836322	0.75441	0.773281	0.751092	0.889825	0.885366	0.861311	0.881633	0.859548	0.834974	0.903407	0.665758	0.909836	0.766852	0.821702	0.89646	0.863799	0.808016	0.682762	0.827405	0.80926	0.782198	0.818903	0.891069	0.576483	0.852497	0.901334	0.887854	0.832589	0.681622	0.775458	0.875412	0.67623	0.844824
cg00034039	0.0903012	0.0594428	0.0903012	0.113016	0.102016	0.083158	0.0950157	0.0648716	0.0810151	0.0893012	0.0674431	0.0745863	0.0544426	0.0774435	0.0627286	0.0793007	0.0983015	0.0850153	0.0895869	0.0971586	0.0558712	0.0871582	0.069586	0.0805865	0.0777292	0.117588	0.102873	0.056014	0.0773007	0.070729	0.0468708	0.118874	0.0548711	0.0885868	0.0828723	0.0898726	0.0955871	0.107302	0.0664431	0.0907298	0.0893012	0.0804436	0.0980158	0.0910155	0.0877297	0.0888726	0.088444	0.0663002	0.09673
cg00035623	0.0452558	0.0526316	0.0712426	0.0680693	0.0583779	0.0738156	0.0384804	0.0722718	0.0471427	0.113353	0.138997	0.0520313	0.0417395	0.084622	0.0379658	0.0558049	0.0758739	0.130249	0.147145	0.0554619	0.13651	0.0570056	0.0451701	0.0481718	0.0804195	0.0923408	0.321676	0.0390808	0.0430259	0.0361647	0.0381373	0.0520313	0.0592355	0.0537466	0.0800764	0.145858	0.0609508	0.0406245	0.0425114	0.176305	0.0723576	0.0547758	0.052117	0.145772	0.0772462	0.211983	0.0814487	0.0335918	0.0504875
cg00037763	0.583207	0.390948	0.697274	0.491301	0.601462	0.724428	0.906062	0.851481	0.377325	0.906062	0.504378	0.517002	0.778827	0.722158	0.94584	0.512552	0.757485	0.935577	0.911148	0.862107	0.710079	0.578394	0.54797	0.285963	0.578394	0.430362	0.85248	0.632703	0.607274	0.486124	0.881905	0.906334	0.735144	0.861834	0.723611	0.845033	0.522996	0.623076	0.878726	0.899342	0.427184	0.711804	0.472865	0.799897	0.736053	0.58684	0.943569	0.253542	0.428455
cg00037940	0.912319	0.929888	0.814205	0.838272	0.872046	0.827843	0.929326	0.730932	0.958287	0.924112	0.924834	0.924994	0.94505	0.933177	0.714566	0.843807	0.920341	0.93783	0.771365	0.922186	0.836427	0.821024	0.831132	0.971524	0.949703	0.960132	0.874293	0.90903	0.818938	0.943686	0.888332	0.93775	0.943767	0.867714	0.905179	0.91641	0.929647	0.94842	0.919218	0.842925	0.918657	0.680551	0.943285	0.845091	0.945371	0.890658	0.786527	0.900285	0.959491
cg00040861	0.0284098	0.0313516	0.0292503	0.0328226	0.0290402	0.0265186	0.0263084	0.0296706	0.0292503	0.0269388	0.0218956	0.0235767	0.0212652	0.0296706	0.0229463	0.0281996	0.0307212	0.0328226	0.0263084	0.0328226	0.0200044	0.0330327	0.0258882	0.0305111	0.0311415	0.0361847	0.030301	0.0233666	0.0227362	0.0216855	0.0218956	0.0269388	0.0235767	0.0267287	0.0313516	0.0277794	0.0361847	0.0277794	0.023997	0.038286	0.0292503	0.0313516	0.035134	0.0237868	0.0273591	0.0298807	0.0321922	0.0187436	0.0252578
cg00040873	0.123866	0.0443749	0.126841	0.0886295	0.1049	0.0545088	0.0855614	0.050604	0.211817	0.0569261	0.100437	0.0929991	0.13995	0.0459554	0.114104	0.073754	0.107038	0.242591	0.0826793	0.0764502	0.0368442	0.0468852	0.0552526	0.0438171	0.100158	0.0977407	0.109734	0.23255	0.0411209	0.228924	0.070407	0.123122	0.0913257	0.0588785	0.181229	0.235432	0.0842598	0.0942078	0.0718946	0.04735	0.146272	0.165703	0.0753345	0.124424	0.073754	0.139671	0.402502	0.0992283	0.218232
cg00041575	0.405856	0.178275	0.672712	0.458081	0.172331	0.50606	0.396621	0.178381	0.524105	0.453941	0.552128	0.285803	0.512641	0.224025	0.406175	0.323698	0.586414	0.854438	0.231243	0.422309	0.312871	0.309156	0.335162	0.492261	0.495658	0.382504	0.262026	0.543636	0.30767	0.31977	0.290686	0.743407	0.156621	0.795632	0.607007	0.51296	0.680249	0.217656	0.168934	0.565715	0.521876	0.364246	0.716658	0.350129	0.234852	0.597878	0.408298	0.459143	0.206829
cg00043004	0.0592739	0.0573892	0.0573892	0.0765048	0.0744407	0.05712	0.0632226	0.0599021	0.220634	0.0731843	0.0556841	0.0680688	0.0581969	0.0622354	0.0533507	0.0717483	0.0608893	0.108813	0.0576585	0.0638508	0.0554148	0.0581072	0.0680688	0.0607098	0.0585559	0.0584662	0.0621457	0.065556	0.065556	0.0595431	0.0711201	0.069415	0.0800048	0.08171	0.0745304	0.0695945	0.0660047	0.0599021	0.0598123	0.0607995	0.0585559	0.133672	0.0572995	0.0717483	0.0656457	0.0692355	0.433419	0.0518251	0.0634919
cg00044245	0.150845	0.0764514	0.0782733	0.282224	0.290018	0.564112	0.256819	0.576865	0.430304	0.190016	0.478787	0.524536	0.0752368	0.0712893	0.315524	0.0785769	0.413097	0.0725039	0.23192	0.43496	0.0707833	0.25358	0.398218	0.0763502	0.0809049	0.642352	0.525852	0.473118	0.613708	0.399332	0.0725039	0.109448	0.134853	0.0725039	0.0764514	0.180704	0.283641	0.379898	0.0760465	0.0758441	0.548423	0.394271	0.0763502	0.383339	0.522816	0.0817146	0.522816	0.0667346	0.0821195
cg00047050	0.0341796	0.0516677	0.052349	0.0439457	0.0805116	0.0359966	0.0409932	0.048488	0.0448542	0.0718811	0.0316813	0.0423559	0.0339525	0.042583	0.0294102	0.0405389	0.0403118	0.0364508	0.0319085	0.042583	0.0296373	0.0455355	0.0432643	0.0675659	0.0528033	0.0414474	0.0859624	0.0384949	0.0473524	0.0373593	0.044627	0.042583	0.0437186	0.0480338	0.0518948	0.0480338	0.031	0.050305	0.0287288	0.0443999	0.0605253	0.0355423	0.0573456	0.0528033	0.0437186	0.0398576	0.0512134	0.0344068	0.0473524
cg00047469	0.0715433	0.0598808	0.0720292	0.0686276	0.0625534	0.0666839	0.0647401	0.049919	0.0625534	0.0637683	0.0676558	0.0591518	0.049919	0.0620675	0.0484612	0.0698425	0.0705714	0.0664409	0.0564792	0.0800472	0.0542925	0.0703284	0.0586659	0.0686276	0.0572081	0.057694	0.0754308	0.0538065	0.0538065	0.0542925	0.0508909	0.0608526	0.050405	0.0627964	0.0834487	0.0644972	0.0661979	0.0781034	0.0562362	0.0591518	0.088794	0.0598808	0.0647401	0.0756737	0.0722722	0.0727581	0.0589089	0.0559933	0.0715433
cg00050312	0.0342173	0.0230103	0.0436664	0.0318001	0.0416887	0.0359753	0.037953	0.0348766	0.0366346	0.041469	0.0291632	0.0328989	0.0304817	0.0315804	0.0318001	0.0550932	0.0458639	0.0361951	0.0320199	0.0302619	0.0254275	0.0430072	0.0359753	0.0458639	0.052676	0.0346568	0.042348	0.0265262	0.0476219	0.0236695	0.0263065	0.0392715	0.0359753	0.0430072	0.0542143	0.0403702	0.0342173	0.053555	0.0333384	0.0432269	0.0307014	0.0401505	0.0318001	0.0513576	0.0324594	0.0392715	0.071794	0.0212523	0.0390518
cg00051979	0.0591839	0.147722	0.0571585	0.0672855	0.0548438	0.0855139	0.0461636	0.0800164	0.0693108	0.0522398	0.0476103	0.0580266	0.0548438	0.0713362	0.060052	0.063524	0.0614987	0.0554225	0.0464529	0.0583159	0.0455849	0.06092	0.0452956	0.1049	0.0432702	0.0678641	0.0525291	0.0519504	0.0548438	0.0528184	0.0429809	0.0458743	0.0470316	0.0400875	0.0571585	0.0571585	0.0698895	0.0693108	0.0794378	0.0855139	0.0996916	0.0533971	0.0727829	0.0455849	0.090722	0.0507931	0.047321	0.0383514	0.0643921
cg00053292	0.0454902	0.0922329	0.0488026	0.0646289	0.0664692	0.0756705	0.0524832	0.0631567	0.0620526	0.0407055	0.0642609	0.0557956	0.0885524	0.0473304	0.0701497	0.0753025	0.07199	0.0624206	0.0418096	0.0517471	0.0491707	0.078983	0.0576359	0.0572679	0.0458582	0.065365	0.0451221	0.0598442	0.0499068	0.0598442	0.0701497	0.0451221	0.0730942	0.0491707	0.0554276	0.0521151	0.0517471	0.0535873	0.0454902	0.0705178	0.0753025	0.0620526	0.058004	0.0543234	0.0716219	0.0484346	0.0738303	0.0521151	0.0528512
cg00054706	0.0381507	0.058132	0.0341544	0.0253055	0.0335835	0.0407197	0.0324417	0.0327272	0.0367234	0.0395779	0.0244492	0.0253055	0.0201675	0.0273037	0.0221656	0.0295873	0.0310145	0.0392925	0.0247346	0.0330126	0.0193111	0.0341544	0.0287309	0.0321563	0.0284455	0.0375798	0.0275891	0.025591	0.0295873	0.0273037	0.025591	0.0287309	0.0293018	0.0273037	0.0298727	0.0375798	0.0341544	0.0432887	0.0164567	0.0327272	0.0441451	0.0327272	0.0304436	0.0315854	0.0287309	0.0233074	0.0315854	0.0170276	0.0321563
cg00056767	0.0370075	0.034783	0.0374194	0.034783	0.0401383	0.0388201	0.0397263	0.0353597	0.0410446	0.0380786	0.0340415	0.0358541	0.0332176	0.0387377	0.0345358	0.0401383	0.0446697	0.0351125	0.0370075	0.0398911	0.0321465	0.0402207	0.0422804	0.0398087	0.0422804	0.032888	0.0365132	0.0339591	0.0376666	0.0322289	0.0330528	0.034371	0.0361836	0.0397263	0.0397263	0.0399735	0.0523319	0.040715	0.0361012	0.0382433	0.0365956	0.0430219	0.0356069	0.0406326	0.0336295	0.0395616	0.0732588	0.0294277	0.0416213
cg00059225	0.35693	0.318082	0.311963	0.249658	0.372136	0.580931	0.318268	0.455116	0.73966	0.49999	0.624137	0.672905	0.377884	0.247248	0.270241	0.419328	0.297499	0.215261	0.324202	0.452427	0.459288	0.655011	0.468096	0.201724	0.291937	0.753104	0.351367	0.695528	0.578428	0.620799	0.665673	0.662614	0.384003	0.174188	0.251605	0.592892	0.348215	0.311778	0.508984	0.224347	0.585011	0.527898	0.377049	0.540136	0.408758	0.312983	0.654547	0.347751	0.314652
cg00059424	0.026457	0.0387776	0.0338493	0.0209374	0.0349335	0.0263584	0.0305967	0.0307938	0.030301	0.0361163	0.0224159	0.0197546	0.0244857	0.0300053	0.0276398	0.0362149	0.02488	0.0250771	0.0211345	0.0244857	0.02488	0.0471555	0.0343422	0.0297096	0.0352292	0.0288225	0.0400589	0.0232044	0.0406503	0.0208388	0.0274426	0.0239929	0.0213316	0.0415374	0.0460713	0.0260627	0.0238943	0.0276398	0.028724	0.0298082	0.0238943	0.0228101	0.019656	0.0342436	0.026457	0.0319766	0.0366091	0.0145307	0.0333565
cg00059740	0.0309013	0.0326734	0.0300153	0.0294246	0.0335594	0.0288339	0.0273572	0.0211551	0.0373988	0.0258805	0.0291293	0.0267665	0.0291293	0.0223364	0.020269	0.0382849	0.0300153	0.0311967	0.0241085	0.0300153	0.0252898	0.0241085	0.0273572	0.0300153	0.0229271	0.0288339	0.0320827	0.0220411	0.0335594	0.0350361	0.0267665	0.0311967	0.0326734	0.0249945	0.0273572	0.0338547	0.0261759	0.0246992	0.0223364	0.0317874	0.0309013	0.0300153	0.0279479	0.0241085	0.0365128	0.0285386	0.0261759	0.0217457	0.0311967
cg00059930	0.703845	0.855726	0.807641	0.54704	0.700852	0.829946	0.825311	0.830235	0.763033	0.757047	0.833035	0.517687	0.830042	0.85756	0.854953	0.70481	0.752702	0.636063	0.807641	0.579289	0.889134	0.571854	0.784758	0.817683	0.590393	0.870306	0.807352	0.841822	0.856402	0.651512	0.883534	0.784372	0.700852	0.434456	0.775875	0.651802	0.658561	0.754246	0.840084	0.67372	0.831104	0.724121	0.758398	0.750577	0.833035	0.809476	0.806579	0.601497	0.749998
cg00060762	0.0369252	0.0283917	0.0411919	0.0368067	0.0375178	0.0356215	0.0256657	0.0517403	0.0365696	0.0583775	0.0266139	0.0222286	0.0196212	0.0294584	0.0259028	0.0439179	0.0318288	0.0356215	0.0219916	0.0291028	0.0187915	0.064185	0.0350289	0.0336066	0.0352659	0.0263769	0.0280361	0.0165396	0.0314732	0.0248361	0.0344363	0.0224657	0.0289843	0.044629	0.0583775	0.0306436	0.0325399	0.0365696	0.0197397	0.0352659	0.0283917	0.0256657	0.0338437	0.0318288	0.0283917	0.0313547	0.0390586	0.0131025	0.03574
cg00060882	0.0982603	0.213475	0.103583	0.0964574	0.158186	0.10779	0.111997	0.118693	0.125905	0.130884	0.168917	0.107017	0.107103	0.104356	0.109679	0.114057	0.094912	0.497906	0.123673	0.111825	0.138525	0.109507	0.139727	0.0930233	0.112168	0.161105	0.123844	0.153893	0.107361	0.131314	0.0968866	0.148999	0.140672	0.116032	0.105901	0.0968866	0.0974876	0.121698	0.546756	0.101523	0.0846955	0.116032	0.484341	0.124445	0.111224	0.125819	0.0952554	0.106931	0.10221
cg00061059	0.0646455	0.0840776	0.0593216	0.0531105	0.0875381	0.0661539	0.0471655	0.0917084	0.0801734	0.0939267	0.0321699	0.0401557	0.0306615	0.0481415	0.036429	0.0863846	0.0622497	0.0651779	0.0398008	0.051957	0.0317263	0.082303	0.046012	0.0739622	0.0468106	0.0459232	0.07272	0.0343882	0.0475204	0.0324361	0.0313714	0.0356305	0.0303066	0.0516908	0.0695257	0.0589667	0.0665976	0.0681947	0.0444148	0.0617174	0.0596766	0.0624272	0.0573695	0.0541752	0.0577245	0.0532879	0.0734299	0.0248053	0.0550625
cg00061629	0.457366	0.330278	0.465939	0.305355	0.141412	0.553611	0.486355	0.419452	0.738853	0.335227	0.748928	0.541503	0.79135	0.0300552	0.750342	0.0669091	0.244285	0.193291	0.624844	0.07504	0.8115	0.0368604	0.673187	0.063374	0.352196	0.643934	0.045168	0.803988	0.76298	0.770139	0.735759	0.619099	0.240308	0.752905	0.0867943	0.133723	0.353698	0.0905062	0.410526	0.44411	0.54168	0.557676	0.53346	0.461255	0.61742	0.0247525	0.653479	0.046582	0.10827
cg00062776	0.754276	0.959586	0.967624	0.967282	0.919653	0.683901	0.928802	0.85304	0.679882	0.944793	0.969505	0.913068	0.502278	0.945049	0.444217	0.590695	0.96523	0.963519	0.854408	0.959244	0.96617	0.708272	0.963861	0.965999	0.614211	0.806181	0.887244	0.960954	0.629089	0.49595	0.968821	0.922132	0.719645	0.965999	0.967538	0.862703	0.840812	0.65859	0.681165	0.757697	0.94009	0.965743	0.487057	0.965059	0.649355	0.96617	0.957021	0.690913	0.545803
cg00063144	0.935389	0.958192	0.899312	0.949316	0.904442	0.932783	0.940846	0.948664	0.928304	0.906397	0.920405	0.929282	0.937588	0.882291	0.942963	0.937996	0.941823	0.948664	0.882128	0.90599	0.921056	0.908922	0.911283	0.941905	0.917717	0.96316	0.869098	0.80134	0.758666	0.89353	0.953632	0.91788	0.895158	0.92692	0.86128	0.944836	0.92635	0.775524	0.68366	0.946302	0.928956	0.950049	0.95241	0.884408	0.932621	0.88392	0.933435	0.931073	0.924884
cg00065385	0.955271	0.948049	0.955863	0.92508	0.963204	0.951364	0.934789	0.948049	0.953377	0.954561	0.950536	0.958823	0.976938	0.853806	0.900217	0.954561	0.966756	0.956692	0.955271	0.937749	0.924725	0.925554	0.92366	0.955982	0.956929	0.968532	0.965098	0.965335	0.959771	0.977648	0.935736	0.961546	0.969716	0.909097	0.941301	0.958942	0.931355	0.915846	0.955508	0.949352	0.957995	0.957876	0.921529	0.957403	0.922594	0.911346	0.892995	0.971373	0.957758
cg00065408	0.0533103	0.0348129	0.0432909	0.0631756	0.050844	0.0557766	0.0488401	0.0297261	0.0337339	0.050844	0.0278764	0.0382041	0.028493	0.0411329	0.0264891	0.0690331	0.0468362	0.0563932	0.0465279	0.0577805	0.0343505	0.0583971	0.0419036	0.0560849	0.0488401	0.0611717	0.0482235	0.0286471	0.0496108	0.0272598	0.0301886	0.0352753	0.0266432	0.0474528	0.0463738	0.0452948	0.0567015	0.0534645	0.0331173	0.0469904	0.0550059	0.0488401	0.0594761	0.0491484	0.044524	0.044524	0.0590137	0.0271057	0.0506898
cg00066153	0.968056	0.959177	0.95867	0.953343	0.936601	0.965773	0.944084	0.960826	0.94827	0.954485	0.967422	0.960319	0.951694	0.960699	0.95106	0.945987	0.954358	0.957529	0.960192	0.958543	0.941674	0.962602	0.950045	0.940786	0.960699	0.969832	0.946114	0.962221	0.953724	0.952328	0.961841	0.963109	0.92544	0.95588	0.96108	0.95829	0.96387	0.96349	0.957021	0.943831	0.972241	0.963236	0.945606	0.950806	0.970593	0.936347	0.963743	0.971861	0.953597
cg00066816	0.172156	0.119889	0.635432	0.11441	0.176679	0.118324	0.13189	0.394793	0.166504	0.14224	0.119889	0.141718	0.120933	0.123542	0.144501	0.128325	0.406708	0.121889	0.120063	0.238165	0.405055	0.322262	0.134326	0.113801	0.15485	0.69544	0.293737	0.315827	0.74675	0.134586	0.111888	0.211901	0.236164	0.122237	0.177722	0.179897	0.136413	0.265907	0.123194	0.122846	0.151197	0.140674	0.140848	0.16346	0.452626	0.151371	0.154154	0.114845	0.158416
cg00067471	0.0555481	0.05111	0.0857558	0.0575524	0.110237	0.0571229	0.048533	0.0797429	0.0712962	0.0658559	0.0611315	0.0648538	0.0529711	0.0594135	0.0452402	0.0549754	0.0727278	0.0449539	0.0449539	0.0578387	0.0446676	0.0627063	0.0586977	0.0536869	0.0552618	0.0486762	0.0525416	0.0764501	0.0495352	0.05111	0.0433791	0.0751616	0.0682897	0.0496783	0.0785976	0.0886191	0.0655696	0.0629926	0.059843	0.0551186	0.0492488	0.134145	0.0594135	0.109951	0.0479604	0.0617042	0.0840378	0.05111	0.0625631
cg00069261	0.0410772	0.0409878	0.0339254	0.0391104	0.046888	0.0409878	0.0387528	0.0396468	0.0354451	0.0393786	0.0349982	0.0367861	0.0377695	0.0384846	0.0334784	0.0409878	0.0380377	0.0368755	0.0349982	0.0361603	0.0362497	0.0355345	0.0387528	0.0376801	0.0365179	0.0374119	0.0682539	0.0354451	0.0339254	0.044653	0.0360709	0.034283	0.0391998	0.0371437	0.0392892	0.0905137	0.0430439	0.039468	0.0336572	0.0408984	0.0445636	0.0479607	0.0396468	0.039468	0.0409878	0.0375907	0.0762102	0.0306177	0.0405408
cg00071250	0.816589	0.493011	0.786158	0.862283	0.668441	0.854175	0.627422	0.655659	0.415074	0.760974	0.841869	0.752007	0.837004	0.727395	0.778622	0.706122	0.689237	0.866957	0.745711	0.664816	0.892523	0.424995	0.715376	0.868007	0.517527	0.856369	0.82031	0.701257	0.87249	0.667392	0.861997	0.68628	0.580202	0.89052	0.832425	0.637152	0.549103	0.711178	0.803425	0.775951	0.775188	0.725297	0.830231	0.639728	0.735027	0.73703	0.888421	0.876879	0.329886
cg00071998	0.045515	0.044275	0.04474	0.04381	0.0600857	0.04505	0.0489252	0.0501652	0.0611707	0.0521803	0.0317194	0.0430349	0.0253642	0.0416399	0.0295493	0.04567	0.044275	0.0515603	0.0360596	0.0400898	0.0289293	0.0538854	0.045205	0.0523353	0.0407098	0.0473751	0.0755863	0.0360596	0.0394698	0.0262942	0.0286193	0.04536	0.0286193	0.0512503	0.0579156	0.0436549	0.0422599	0.045825	0.04443	0.04412	0.0372997	0.04381	0.0407098	0.0470651	0.0334245	0.044275	0.045825	0.021799	0.0461351
cg00072216	0.0158376	0.0149066	0.0162673	0.0168402	0.0154079	0.0171983	0.0141189	0.0139756	0.0145486	0.0143337	0.0139756	0.0149066	0.0149782	0.0154079	0.0131879	0.0174847	0.0156944	0.0164105	0.0142621	0.0176996	0.013546	0.0144053	0.0136176	0.0154079	0.014835	0.0173415	0.0167686	0.0144769	0.0143337	0.0133311	0.0167686	0.013904	0.0144053	0.0146202	0.0137608	0.0162673	0.0181292	0.0176279	0.0147634	0.0163389	0.0171983	0.0159092	0.0174847	0.0140473	0.0161241	0.015766	0.0695478	0.0120421	0.0150498
cg00075967	0.693607	0.315925	0.796211	0.869015	0.559186	0.252749	0.276681	0.557352	0.277598	0.423939	0.373692	0.308773	0.442003	0.810332	0.266503	0.441269	0.430816	0.562395	0.35572	0.376993	0.752199	0.350402	0.492525	0.210571	0.859387	0.288601	0.453831	0.355445	0.247339	0.634007	0.772738	0.838023	0.586327	0.705069	0.487207	0.591828	0.335456	0.342516	0.255133	0.260451	0.82216	0.375342	0.314642	0.401383	0.306481	0.305839	0.442094	0.190857	0.40395
cg00076645	0.0375599	0.0476896	0.0349778	0.0330908	0.036666	0.0327929	0.0331901	0.032495	0.0361695	0.0384537	0.0320977	0.0297142	0.0290191	0.0330908	0.0325943	0.0305087	0.0345805	0.0376592	0.0287211	0.0373612	0.0292177	0.0376592	0.0326936	0.0333888	0.0363681	0.0364674	0.0436179	0.0315018	0.0310053	0.0299129	0.030608	0.0319984	0.0295156	0.0316012	0.0365667	0.0333888	0.0377585	0.0318991	0.0299129	0.0317005	0.0384537	0.0386523	0.040142	0.0331901	0.0405392	0.0396454	0.0389502	0.026139	0.0374605
cg00077877	0.854165	0.359074	0.640767	0.750226	0.598854	0.453657	0.562836	0.579021	0.529717	0.450851	0.439718	0.426059	0.872876	0.604842	0.412306	0.518958	0.326423	0.889903	0.369926	0.637773	0.838915	0.315009	0.761359	0.589031	0.39425	0.445799	0.873998	0.788864	0.422784	0.362816	0.249427	0.695964	0.401173	0.927605	0.856972	0.717669	0.842377	0.356548	0.88878	0.460206	0.453844	0.95773	0.684831	0.421381	0.457867	0.696057	0.846493	0.425591	0.311641
cg00078194	0.0307337	0.0441726	0.0275508	0.0342702	0.0321483	0.0333861	0.0256057	0.0279044	0.0261362	0.031441	0.0204777	0.0280813	0.0240142	0.0326788	0.021185	0.0238374	0.0385141	0.0424043	0.0248984	0.0374531	0.0206545	0.0213618	0.0250752	0.0367458	0.0243679	0.0360385	0.0356849	0.0218923	0.0279044	0.0225996	0.0229533	0.0233069	0.0241911	0.025252	0.0236606	0.0275508	0.0390446	0.031441	0.0245447	0.0349776	0.0332093	0.0333861	0.0319715	0.0248984	0.0413434	0.0250752	0.0254289	0.019063	0.0279044
cg00078867	0.578299	0.658636	0.799454	0.693066	0.502151	0.691609	0.60699	0.707457	0.785973	0.618012	0.807287	0.797085	0.892907	0.635227	0.939178	0.728225	0.555527	0.763475	0.722122	0.648981	0.765388	0.732415	0.675669	0.224341	0.660275	0.795901	0.483934	0.632585	0.60526	0.400409	0.905295	0.694706	0.284276	0.892087	0.587498	0.484845	0.792622	0.463531	0.389388	0.735056	0.628122	0.799727	0.708186	0.494045	0.717477	0.795264	0.804099	0.883889	0.503518
cg00079563	0.0162531	0.0198563	0.0189555	0.0143228	0.0170252	0.0962958	0.0135507	0.0116204	0.0117491	0.0141941	0.0149662	0.0150949	0.0165105	0.0235882	0.0122638	0.0141941	0.0152236	0.022044	0.0112344	0.0264193	0.0131646	0.013422	0.0161244	0.0181834	0.0261619	0.0159957	0.0126499	0.0139368	0.0167679	0.0246177	0.0131646	0.0300225	0.0192129	0.0163818	0.0139368	0.0754487	0.0148376	0.0136794	0.0132933	0.0157384	0.0207571	0.0153523	0.0185695	0.0259046	0.0162531	0.0450788	0.0346552	0.0112344	0.0132933
cg00080012	0.0212885	0.024686	0.0242613	0.0340292	0.0263848	0.0225626	0.0263848	0.017891	0.0234119	0.0204391	0.00982191	0.0204391	0.0174663	0.0297823	0.0144935	0.0174663	0.0187404	0.0229873	0.0191651	0.024686	0.0170416	0.030207	0.0217132	0.017891	0.0191651	0.024686	0.0212885	0.0153429	0.0229873	0.01237	0.024686	0.0200144	0.0229873	0.0187404	0.0242613	0.0217132	0.0153429	0.0229873	0.0200144	0.0242613	0.0263848	0.0183157	0.0200144	0.0229873	0.0234119	0.0200144	0.0280835	0.0115207	0.0187404
cg00081935	0.0482014	0.0444441	0.108774	0.0436471	0.0672155	0.0487706	0.0542358	0.0437609	0.0456965	0.0524141	0.0403452	0.0395482	0.0376126	0.0392066	0.0365879	0.0603841	0.0543497	0.0477459	0.0439886	0.0507062	0.0367018	0.0515032	0.0508201	0.0450133	0.0479736	0.0428501	0.0429639	0.0719976	0.0567407	0.0360186	0.0429639	0.165361	0.0436471	0.0532111	0.0411422	0.0661908	0.0520725	0.0501369	0.0392066	0.0583347	0.0443302	0.062889	0.0479736	0.0534388	0.0540081	0.0476321	0.32385	0.0328306	0.153406
cg00081975	0.0512504	0.0196711	0.118895	0.0237082	0.0263099	0.0236185	0.183758	0.0237979	0.0291808	0.050443	0.100234	0.0271174	0.0423688	0.0235288	0.0225419	0.0290014	0.0352813	0.0209271	0.0338459	0.0619264	0.0185048	0.0337562	0.0250539	0.0220037	0.0197608	0.0453293	0.0517887	0.0190431	0.0213757	0.0347431	0.0168002	0.0442527	0.041023	0.0201197	0.0282836	0.0395876	0.0241568	0.0300779	0.0189534	0.0220934	0.0246054	0.0282836	0.0453293	0.0859698	0.0445219	0.0296294	0.0205682	0.0190431	0.0467647
cg00083937	0.673538	0.764354	0.746693	0.568499	0.656527	0.749947	0.6173	0.843366	0.909642	0.642119	0.600104	0.734051	0.707931	0.650578	0.786106	0.600476	0.6991	0.677442	0.64528	0.640911	0.942362	0.577981	0.678	0.747716	0.673166	0.816967	0.648626	0.855264	0.769932	0.821243	0.951193	0.796331	0.592946	0.744741	0.599639	0.709697	0.677814	0.730147	0.7809	0.668518	0.762681	0.828865	0.647697	0.612095	0.725407	0.689061	0.868835	0.944221	0.626038
cg00084687	0.0203677	0.0184099	0.0135154	0.0166479	0.0142985	0.0192909	0.0150817	0.0115576	0.0131239	0.013907	0.0124386	0.0141028	0.0129281	0.0155711	0.0122429	0.0154732	0.0168437	0.0229129	0.0133196	0.0200741	0.0120471	0.0157669	0.0151796	0.0163542	0.0134175	0.0163542	0.0138091	0.0129281	0.0146901	0.0114597	0.0150817	0.013026	0.012145	0.0129281	0.0151796	0.0157669	0.0163542	0.0148859	0.0148859	0.0166479	0.0238918	0.0188994	0.0164521	0.0135154	0.0152774	0.0133196	0.0140049	0.0102851	0.0252622
cg00089071	0.0153027	0.0624977	0.0171471	0.0170386	0.0150857	0.0135668	0.0151942	0.0154112	0.0132413	0.018232	0.0123734	0.0126988	0.0150857	0.0158452	0.0155197	0.0137838	0.0172556	0.0183405	0.0129158	0.0136753	0.0113969	0.0126988	0.0131328	0.0154112	0.0125903	0.019968	0.0173641	0.0135668	0.0134583	0.0135668	0.0132413	0.0135668	0.0113969	0.0143263	0.0136753	0.0153027	0.0162792	0.0161707	0.0155197	0.0160622	0.0173641	0.0144347	0.0157367	0.0135668	0.0148687	0.0161707	0.0154112	0.00890154	0.0174726
cg00090147	0.386511	0.636959	0.648134	0.690791	0.388374	0.672079	0.508809	0.592262	0.66117	0.524063	0.51617	0.625608	0.458613	0.234415	0.00436492	0.495594	0.490451	0.675449	0.544017	0.461362	0.691678	0.4885	0.50872	0.127106	0.538962	0.540292	0.333388	0.667733	0.218275	0.611595	0.482824	0.567696	0.0339859	0.322924	0.0487964	0.356535	0.407441	0.41223	0.432982	0.630397	0.619045	0.653277	0.53231	0.481671	0.602461	0.23007	0.50065	0.595011	0.340838
cg00091693	0.287265	0.328327	0.228179	0.185624	0.75025	0.179225	0.214634	0.24791	0.295051	0.266254	0.545581	0.274573	0.419836	0.272547	0.283852	0.471883	0.282572	0.214527	0.280013	0.233618	0.22114	0.30145	0.289932	0.213354	0.236498	0.428902	0.896899	0.571285	0.188397	0.283532	0.216447	0.345818	0.541741	0.239058	0.396905	0.487455	0.234685	0.274467	0.284172	0.176772	0.292065	0.272547	0.319368	0.7222	0.317128	0.269134	0.319048	0.192557	0.372802
cg00093177	0.905534	0.945889	0.908257	0.912466	0.906607	0.880859	0.915024	0.942918	0.941763	0.900665	0.92633	0.895961	0.931034	0.92468	0.945476	0.934583	0.904048	0.901655	0.936068	0.879538	0.913044	0.915272	0.871698	0.904461	0.922617	0.909165	0.94102	0.915437	0.889111	0.91651	0.906277	0.9175	0.897612	0.890844	0.910651	0.913539	0.889689	0.907267	0.94069	0.901655	0.895548	0.922617	0.888616	0.702273	0.899179	0.875082	0.909248	0.910403	0.873432
cg00094851	0.0963111	0.0779175	0.0719444	0.0582914	0.092329	0.0870195	0.0800982	0.0792449	0.0937512	0.0689104	0.0640749	0.0848388	0.0560159	0.0689104	0.0507064	0.0873988	0.0768746	0.0808567	0.0730821	0.0671089	0.0624631	0.0873988	0.0854077	0.0875884	0.0946993	0.102379	0.100009	0.0724184	0.103232	0.0607565	0.0498531	0.0795293	0.0568692	0.105129	0.102284	0.095837	0.0777279	0.0914757	0.0770642	0.0900535	0.0635061	0.0863558	0.0538352	0.101147	0.0920446	0.101147	0.10968	0.046345	0.0942252
cg00095526	0.757178	0.654859	0.786169	0.774351	0.62909	0.795059	0.708892	0.653738	0.738692	0.766875	0.596664	0.42817	0.74445	0.618786	0.516457	0.785058	0.695558	0.642889	0.542924	0.600402	0.834253	0.592118	0.691316	0.650606	0.757178	0.637171	0.490092	0.810312	0.800211	0.802231	0.639192	0.749703	0.575249	0.768593	0.694952	0.676264	0.620605	0.599189	0.62111	0.632019	0.790109	0.835566	0.722428	0.691316	0.540802	0.616867	0.709296	0.645758	0.582118
cg00095674	0.0241272	0.0359044	0.0841679	0.0346728	0.0853225	0.0296694	0.071313	0.0878627	0.522234	0.0395222	0.478435	0.0412927	0.0172764	0.027822	0.00726959	0.0291306	0.0576114	0.0405999	0.0476046	0.031055	0.00603799	0.027668	0.0347498	0.0272062	0.0612293	0.159373	0.0795494	0.452187	0.0560719	0.128506	0.252513	0.0417545	0.012196	0.139282	0.030824	0.0827823	0.0322866	0.0553022	0.0282838	0.0307471	0.0220488	0.593667	0.018431	0.0596128	0.211331	0.0393683	0.519386	0.00188132	0.049683
cg00096922	0.0997387	0.888839	0.268327	0.177333	0.311449	0.873856	0.295248	0.507323	0.627308	0.207543	0.537654	0.57773	0.546546	0.212172	0.0878011	0.0914555	0.0921864	0.17782	0.209492	0.20267	0.0918209	0.736939	0.0941353	0.0936481	0.0927954	0.718424	0.779817	0.628892	0.294395	0.0974243	0.175628	0.250908	0.172461	0.0884102	0.100104	0.244817	0.0985206	0.297806	0.0921864	0.327528	0.585648	0.499283	0.0960843	0.490756	0.0958407	0.175506	0.663121	0.197067	0.0975461
cg00097536	0.0690153	0.0419059	0.0570367	0.069961	0.0472647	0.0554606	0.0523084	0.0472647	0.0497865	0.050417	0.0478952	0.0516779	0.0488409	0.0545149	0.0419059	0.043482	0.053254	0.0472647	0.0441125	0.0557758	0.0478952	0.0627108	0.04758	0.0535693	0.0497865	0.0636565	0.0516779	0.0456886	0.053254	0.0463191	0.0463191	0.0469495	0.043482	0.0425363	0.04758	0.0554606	0.0469495	0.0589281	0.0387536	0.0545149	0.0690153	0.0526236	0.0608195	0.0516779	0.0485256	0.0535693	0.0570367	0.0403298	0.0646022
cg00098239	0.0240412	0.0205293	0.0233389	0.0198269	0.0240412	0.0213722	0.0236198	0.0226365	0.0258674	0.0243222	0.0156127	0.0215127	0.0160341	0.022215	0.0149103	0.0262889	0.0230579	0.0260079	0.0201079	0.0187031	0.0170174	0.0358413	0.0250246	0.025727	0.0246031	0.0210912	0.0295198	0.0149103	0.0285365	0.0142079	0.0161746	0.0194055	0.0205293	0.0279746	0.0333127	0.037527	0.0268508	0.0250246	0.0189841	0.0246031	0.0220746	0.0275532	0.0199674	0.0243222	0.0230579	0.0239008	0.0320484	0.0116793	0.0309246
cg00101227	0.896197	0.943663	0.913085	0.810774	0.919479	0.893492	0.912675	0.938908	0.929809	0.863159	0.918004	0.881277	0.933498	0.915626	0.921693	0.912101	0.852665	0.932104	0.619104	0.856191	0.910379	0.656077	0.783228	0.917922	0.897263	0.933006	0.827989	0.851518	0.906772	0.902837	0.517531	0.896853	0.789377	0.903985	0.910789	0.893	0.832416	0.889966	0.936039	0.886277	0.944483	0.93981	0.735352	0.869799	0.876604	0.817824	0.938581	0.942516	0.691165
cg00103783	0.0186052	0.0172316	0.0247866	0.0231382	0.0293196	0.0176437	0.021902	0.0181931	0.01888	0.0245119	0.0124238	0.0168195	0.0157206	0.0153085	0.0135228	0.0267097	0.0194294	0.0231382	0.0168195	0.0202536	0.0150338	0.0221767	0.0198415	0.0213525	0.0210778	0.0224514	0.0179184	0.0129733	0.0221767	0.0153085	0.0172316	0.0169569	0.0151711	0.0228635	0.021902	0.0201162	0.0210778	0.0170942	0.0199789	0.01888	0.0230009	0.0208031	0.0166821	0.0216272	0.0148964	0.0197041	0.019292	0.0113249	0.0250613
cg00105253	0.0617921	0.060179	0.0423007	0.0429728	0.0554742	0.0589692	0.0428384	0.0695887	0.062061	0.0600446	0.0365205	0.0453925	0.0409565	0.0418975	0.0306059	0.0378648	0.060179	0.0592381	0.048753	0.04015	0.0283207	0.0755033	0.0440482	0.0517104	0.0366549	0.0513071	0.0749656	0.0375959	0.0381336	0.0342353	0.0350419	0.0435105	0.04714	0.0527857	0.078595	0.0513071	0.0650183	0.0687821	0.0596413	0.0529202	0.0431073	0.0584315	0.0466023	0.0451236	0.0453925	0.0654215	0.08209	0.0250945	0.0455269
cg00105470	0.0230558	0.0171378	0.0218722	0.0153169	0.0356201	0.0263334	0.0243304	0.0198692	0.0211438	0.0260603	0.0131318	0.0155901	0.0118572	0.0125856	0.0141333	0.0152259	0.0301574	0.0289738	0.0175931	0.02342	0.00885268	0.0259693	0.0165005	0.0193229	0.0289738	0.0192319	0.0207797	0.0131318	0.0161363	0.0106736	0.0127676	0.0178662	0.0127676	0.0144065	0.0268797	0.0228737	0.0241483	0.0267887	0.0132229	0.0201423	0.0296111	0.0178662	0.0159542	0.0199602	0.0215991	0.0164095	0.0161363	0.00612131	0.021417
cg00107187	0.316477	0.60697	0.481087	0.233289	0.530576	0.632729	0.17295	0.602383	0.571861	0.568244	0.599119	0.591533	0.560216	0.116316	0.509228	0.0946146	0.474471	0.54372	0.194827	0.509051	0.652754	0.606265	0.46512	0.604148	0.164305	0.626731	0.59462	0.617644	0.616057	0.400193	0.730472	0.540721	0.500406	0.0786475	0.192005	0.470148	0.185653	0.504729	0.0758246	0.391724	0.478617	0.566038	0.143045	0.52396	0.585269	0.355909	0.595591	0.641992	0.212735
cg00107632	0.0470403	0.0379572	0.0373895	0.0518657	0.043918	0.0575426	0.0368218	0.0336995	0.0354026	0.0319964	0.0300095	0.0345511	0.0317126	0.0430664	0.0274549	0.0348349	0.0436341	0.0456211	0.0373895	0.0416472	0.0266034	0.0348349	0.0297257	0.054988	0.0362541	0.0450534	0.0515818	0.0297257	0.0339834	0.0260357	0.0268872	0.0308611	0.0305772	0.0371057	0.0325641	0.0382411	0.0433503	0.0515818	0.0314287	0.0473241	0.0498788	0.0379572	0.0379572	0.0368218	0.0382411	0.0376734	0.0351188	0.025468	0.0331318
cg00108454	0.336495	0.196344	0.283478	0.199826	0.363649	0.210071	0.222106	0.21017	0.317496	0.297404	0.232252	0.241403	0.197936	0.19903	0.210668	0.309539	0.258213	0.201417	0.262689	0.287159	0.135868	0.264579	0.211066	0.192962	0.256821	0.267563	0.405824	0.329731	0.188884	0.349823	0.135967	0.324956	0.415273	0.24389	0.360168	0.370314	0.259407	0.293723	0.222504	0.212856	0.248167	0.242398	0.325056	0.293425	0.289247	0.254732	0.287656	0.191968	0.317795
cg00109274	0.0413078	0.0408389	0.0507657	0.0419332	0.0415423	0.0438873	0.0937558	0.0757781	0.0394319	0.041855	0.0403699	0.0409952	0.0414642	0.0485771	0.0420113	0.0928178	0.0511565	0.0424803	0.0384158	0.0438091	0.0399009	0.0611615	0.0459195	0.0409952	0.0620213	0.0535796	0.131587	0.0408389	0.064288	0.0378686	0.040917	0.0778103	0.041855	0.0522508	0.092427	0.0393537	0.0406044	0.0391974	0.0400572	0.0437309	0.041855	0.054283	0.041386	0.0560026	0.0886751	0.0500622	0.0439654	0.0392756	0.0524853
cg00112517	0.0547958	0.0418414	0.0679856	0.0290048	0.199413	0.0311246	0.0787024	0.0799978	0.106495	0.0989583	0.0631572	0.0519694	0.0499673	0.0542069	0.0479653	0.105789	0.0735207	0.0438434	0.0453744	0.0755227	0.024883	0.0479653	0.0624506	0.0297114	0.0538536	0.0399571	0.0841197	0.121334	0.0232343	0.0616262	0.0239409	0.330841	0.116506	0.0261784	0.0533826	0.0876527	0.0662191	0.0769359	0.0608019	0.0406637	0.0651592	0.146772	0.079409	0.137233	0.0787024	0.0449033	0.114386	0.0204079	0.105318
cg00113951	0.0632561	0.0923261	0.0800118	0.074763	0.0975749	0.0585121	0.0644674	0.101713	0.107366	0.0629533	0.0617421	0.0799108	0.0565943	0.0724415	0.0411508	0.0604299	0.112816	0.0702208	0.063559	0.0725424	0.044078	0.0637608	0.0486202	0.0639627	0.055484	0.0882886	0.116349	0.073148	0.0561905	0.0773874	0.0585121	0.0881877	0.0510427	0.057099	0.0681011	0.0802136	0.0654768	0.0997955	0.0850586	0.0805165	0.0850586	0.082838	0.0598243	0.0726433	0.107669	0.0908121	0.177921	0.0643665	0.0792043
cg00116234	0.0701629	0.054044	0.066508	0.0583548	0.096403	0.0488897	0.0529194	0.457205	0.747439	0.0808464	0.258717	0.0541377	0.0456097	0.782676	0.0397056	0.0686635	0.505468	0.46845	0.636012	0.334532	0.0458908	0.125642	0.109992	0.0623846	0.689242	0.629546	0.28074	0.490567	0.06126	0.0505765	0.0447662	0.549607	0.0443914	0.605461	0.571724	0.0555434	0.682307	0.440055	0.164065	0.0456097	0.241192	0.681276	0.587655	0.34784	0.0474839	0.0538565	0.813601	0.368082	0.351869
cg00116838	0.0954099	0.115149	0.0631554	0.0579662	0.348868	0.0549137	0.0578644	0.0631554	0.577397	0.0615274	0.482363	0.0644781	0.0621379	0.0626466	0.0568469	0.0716006	0.0623414	0.0631554	0.0661061	0.0612221	0.0575592	0.0572539	0.0721093	0.0627484	0.0583732	0.0839123	0.167856	0.359958	0.0553207	0.0548119	0.232365	0.15646	0.0686498	0.0585767	0.0673271	0.0748566	0.0531839	0.576685	0.0978519	0.0691586	0.0796388	0.59093	0.0641729	0.0639694	0.0638676	0.0853368	0.631731	0.0605099	0.0694638
cg00117172	0.0733468	0.818549	0.0476812	0.0438089	0.663745	0.436807	0.0349835	0.295962	0.701118	0.103065	0.760104	0.719579	0.328562	0.27651	0.0332725	0.418166	0.27651	0.0310211	0.72165	0.0322819	0.394392	0.0832528	0.0764987	0.0526342	0.224729	0.75353	0.719219	0.0270587	0.646184	0.0348034	0.0416475	0.344501	0.0277791	0.0412873	0.0610093	0.566486	0.0348934	0.418346	0.307849	0.0314714	0.678424	0.652128	0.0445293	0.318476	0.405829	0.0898268	0.791172	0.0359741	0.0416475
cg00119079	0.0534071	0.0464847	0.0395622	0.0513974	0.0464847	0.046708	0.0417952	0.043805	0.0393389	0.0420185	0.03063	0.0377758	0.0342029	0.0350961	0.0295135	0.0402321	0.043805	0.0346495	0.0404554	0.0440283	0.032863	0.0406787	0.0426885	0.0431351	0.0406787	0.0511741	0.0330863	0.0355427	0.0426885	0.0315232	0.0364359	0.085563	0.0379991	0.0429118	0.0473779	0.0449215	0.043805	0.0449215	0.0270571	0.0484944	0.0556402	0.0417952	0.0404554	0.0393389	0.0350961	0.0373291	0.0368825	0.0281736	0.0406787
cg00121158	0.0359217	0.0328736	0.0300599	0.0340459	0.0331081	0.0321702	0.0300599	0.0302944	0.0328736	0.0307634	0.0227914	0.0274808	0.0218535	0.0272463	0.0190399	0.0286531	0.0265429	0.0272463	0.0253705	0.0366251	0.0249016	0.0298255	0.0272463	0.0291221	0.0277152	0.0281842	0.0347493	0.0197433	0.0352183	0.017633	0.0197433	0.0241982	0.0209156	0.0305289	0.0307634	0.0302944	0.0249016	0.0342804	0.0241982	0.0434247	0.0434247	0.0279497	0.0286531	0.0368596	0.0333425	0.0300599	0.0326391	0.0197433	0.0258395
cg00121640	0.0397143	0.326903	0.126429	0.235694	0.284127	0.399901	0.208959	0.103878	0.421444	0.13844	0.387502	0.3307	0.0939593	0.0252232	0.420592	0.0452938	0.309777	0.0833428	0.0416517	0.30815	0.0211936	0.318999	0.049091	0.0297178	0.258477	0.48801	0.212368	0.507616	0.592083	0.220893	0.380295	0.325275	0.0249132	0.037932	0.043434	0.263049	0.0814055	0.294123	0.25437	0.134721	0.157194	0.345269	0.0380095	0.393547	0.0945793	0.0284779	0.446707	0.00887219	0.312877
cg00121904	0.243159	0.0719515	0.274853	0.230126	0.0996962	0.306942	0.0427257	0.0406523	0.113025	0.0503283	0.047465	0.0369003	0.104633	0.0397636	0.538971	0.044108	0.193396	0.464129	0.0528955	0.0444042	0.0435156	0.0404548	0.0902175	0.417131	0.399359	0.0511182	0.0684957	0.0551664	0.0471688	0.048946	0.166639	0.0620779	0.0434168	0.040356	0.0869593	0.170193	0.0367028	0.0542778	0.457218	0.0471688	0.392052	0.396298	0.392645	0.0515132	0.0543765	0.049341	0.484074	0.0370978	0.334193
cg00123035	0.0794527	0.100055	0.0614786	0.0586807	0.0669895	0.0669895	0.0572394	0.0836919	0.0729244	0.077757	0.0467262	0.0505415	0.0421479	0.0585111	0.0446066	0.0551198	0.0546111	0.0652938	0.0514741	0.0589351	0.0411305	0.108957	0.0536785	0.07072	0.0539328	0.0540176	0.0672439	0.0460479	0.0505415	0.0435044	0.0442675	0.0535937	0.0467262	0.0480827	0.0836919	0.0642764	0.0546959	0.0752983	0.0493545	0.0588503	0.058172	0.0557133	0.0528306	0.0567307	0.0561372	0.075807	0.076994	0.0416392	0.0580872
cg00126034	0.0486002	0.103874	0.0604922	0.0540229	0.432664	0.29015	0.0535473	0.27607	0.620558	0.161812	0.564618	0.354272	0.0467926	0.0486953	0.0473634	0.0856081	0.126517	0.0614435	0.294146	0.0541181	0.328681	0.0615387	0.0872254	0.0542132	0.0564013	0.7097	0.341048	0.606858	0.066676	0.0432726	0.75879	0.0661052	0.0442239	0.0525959	0.0592554	0.18122	0.0473634	0.263227	0.0469829	0.0591603	0.0697204	0.517621	0.0569722	0.0530716	0.270648	0.0545938	0.675071	0.0418455	0.0537375
cg00126657	0.864751	0.529181	0.802634	0.50841	0.450898	0.664781	0.336658	0.307656	0.679771	0.798617	0.430813	0.682221	0.283358	0.314809	0.273071	0.386724	0.44404	0.802438	0.370068	0.424934	0.912074	0.257982	0.366638	0.227904	0.481565	0.423367	0.332738	0.567588	0.797833	0.664487	0.34381	0.794404	0.468632	0.867397	0.475392	0.377318	0.262195	0.588653	0.373693	0.559358	0.249164	0.559848	0.554165	0.665761	0.769322	0.359094	0.250046	0.682809	0.460206
cg00126698	0.722925	0.908307	0.870084	0.897222	0.609307	0.90286	0.909167	0.941847	0.85403	0.837021	0.872186	0.863586	0.613703	0.884608	0.455173	0.8977	0.633196	0.596598	0.842945	0.856992	0.886997	0.807398	0.874766	0.537926	0.66301	0.945669	0.75981	0.874861	0.950256	0.836829	0.904389	0.852405	0.714707	0.934776	0.834441	0.659953	0.89426	0.777393	0.588858	0.899037	0.613129	0.81724	0.826987	0.837976	0.87983	0.888239	0.615423	0.913944	0.831574
cg00128197	0.380373	0.0292219	0.398575	0.233617	0.155594	0.253621	0.0217325	0.0191728	0.101746	0.0228701	0.0252402	0.0201208	0.423698	0.019552	0.465126	0.0223961	0.432325	0.345106	0.0214481	0.0252402	0.0205948	0.0236285	0.0236285	0.198825	0.326145	0.0362373	0.485699	0.0221117	0.0244818	0.0233441	0.0906543	0.0481825	0.0240077	0.019078	0.342925	0.412416	0.0213532	0.0229649	0.483044	0.0229649	0.456689	0.505418	0.422275	0.0250506	0.0284635	0.0221117	0.448631	0.0174663	0.308607
cg00128560	0.943055	0.951642	0.951642	0.938921	0.934071	0.937649	0.948621	0.907276	0.942737	0.884854	0.899404	0.951006	0.969214	0.9553	0.905606	0.911172	0.934627	0.919361	0.942976	0.935979	0.966272	0.89201	0.942181	0.92119	0.956095	0.932162	0.907514	0.959355	0.951483	0.951563	0.958321	0.957526	0.959116	0.951881	0.905049	0.946156	0.947587	0.931606	0.955856	0.932242	0.913398	0.938523	0.933753	0.933037	0.930731	0.942817	0.922144	0.971361	0.935581
cg00128654	0.0490715	0.0398388	0.0548419	0.0506103	0.0675369	0.0367612	0.0583042	0.0475327	0.0383	0.052149	0.0375306	0.0386847	0.0533031	0.0733073	0.0348377	0.0556113	0.0367612	0.0729227	0.0340683	0.0498409	0.0386847	0.0444551	0.0406082	0.0394541	0.0440704	0.0498409	0.0379153	0.0379153	0.0652287	0.0363765	0.0548419	0.0359918	0.0325295	0.0459939	0.050995	0.0383	0.0563807	0.0375306	0.0483021	0.0502256	0.0779237	0.0359918	0.0713839	0.0421469	0.0606124	0.0402235	0.0590736	0.0271438	0.0536878
cg00128877	0.0658007	0.0730725	0.0544437	0.069886	0.0832039	0.0659641	0.0676799	0.0710298	0.0617155	0.0549339	0.0604899	0.0644934	0.0573034	0.0608984	0.0503584	0.0568948	0.0587741	0.0707847	0.0522376	0.067925	0.0736444	0.0687421	0.059346	0.0555876	0.0508487	0.0733176	0.0653105	0.0631861	0.0549339	0.0540352	0.050195	0.0479073	0.079037	0.0468451	0.0716018	0.064902	0.089005	0.0787918	0.0725005	0.0755236	0.0654739	0.0768309	0.06433	0.0604082	0.0788735	0.0733176	0.061552	0.0439854	0.0626142
cg00129774	0.0250561	0.0297472	0.0370966	0.0231796	0.0349074	0.0322491	0.0336564	0.0342819	0.0322491	0.0367838	0.0286526	0.0284962	0.0283398	0.0250561	0.0270889	0.0350637	0.0336564	0.0316236	0.0280271	0.0244306	0.0247433	0.0374093	0.0350637	0.0274016	0.03178	0.0277143	0.0392857	0.0255252	0.0339691	0.0225541	0.0300599	0.0280271	0.0306854	0.0364711	0.0370966	0.0266198	0.0299035	0.0284962	0.0352201	0.029278	0.0239615	0.0284962	0.022085	0.0353765	0.0248997	0.0308417	0.0324054	0.019114	0.03178
cg00131557	0.936952	0.932686	0.936952	0.944092	0.927772	0.931203	0.943814	0.862399	0.943814	0.932594	0.946874	0.916459	0.950119	0.94233	0.812049	0.882521	0.948172	0.946039	0.936025	0.935097	0.786456	0.894668	0.938714	0.921745	0.918777	0.936766	0.916645	0.94743	0.953828	0.951046	0.945483	0.948172	0.868148	0.954106	0.943906	0.936488	0.909319	0.917572	0.934634	0.939363	0.933985	0.939826	0.6737	0.949841	0.953921	0.942979	0.939177	0.930554	0.924619
cg00132141	0.339854	0.217457	0.248941	0.413823	0.412938	0.258172	0.234021	0.270943	0.489057	0.321773	0.22517	0.180789	0.354521	0.190904	0.168524	0.287633	0.31583	0.229975	0.194065	0.211262	0.166754	0.25931	0.263482	0.213032	0.220618	0.711596	0.278023	0.420904	0.211894	0.273471	0.163466	0.540013	0.396753	0.788726	0.36843	0.433548	0.337704	0.396374	0.182433	0.229216	0.22555	0.260701	0.473504	0.267149	0.196847	0.234021	0.530024	0.151328	0.258172
cg00133909	0.0633003	0.0590335	0.0762299	0.0430007	0.13325	0.0440351	0.146309	0.0949779	0.0715753	0.102865	0.0585163	0.0471382	0.0305882	0.0502413	0.0344671	0.0555425	0.0586456	0.0489484	0.0495948	0.060585	0.0292953	0.077135	0.0519222	0.0488191	0.0494655	0.0516636	0.154454	0.0578698	0.0582577	0.031364	0.0259336	0.0767471	0.0351136	0.0472675	0.0698944	0.0503706	0.0719631	0.0612315	0.0336914	0.0461038	0.0493362	0.061878	0.0664034	0.0964002	0.0577405	0.0560597	0.065369	0.022184	0.0727389
cg00134539	0.900764	0.886313	0.884386	0.923886	0.760107	0.874477	0.860576	0.853007	0.681245	0.839382	0.931043	0.832913	0.935722	0.911775	0.910123	0.784467	0.8592	0.927327	0.905306	0.813507	0.953339	0.849841	0.787358	0.90159	0.904205	0.915766	0.876129	0.868697	0.931318	0.899113	0.936823	0.842547	0.863191	0.922785	0.840483	0.790936	0.859613	0.827683	0.932006	0.91439	0.868421	0.854658	0.863467	0.757217	0.896498	0.900489	0.900627	0.944668	0.870073
cg00134787	0.911424	0.367864	0.659683	0.291584	0.572304	0.532579	0.390413	0.855755	0.566843	0.762828	0.868968	0.322677	0.807133	0.327346	0.939786	0.679413	0.352273	0.822812	0.302594	0.346372	0.932123	0.499019	0.37632	0.236356	0.801232	0.549755	0.298983	0.467045	0.616786	0.749527	0.52518	0.670781	0.703372	0.714646	0.438242	0.675978	0.412434	0.368921	0.373237	0.485983	0.260491	0.933092	0.385568	0.404859	0.34003	0.354739	0.763444	0.522185	0.363372
cg00135056	0.0843974	0.0601259	0.0836765	0.0568817	0.0924479	0.0656531	0.119002	0.0861998	0.132099	0.107227	0.110712	0.0990565	0.0926882	0.0591646	0.0639709	0.087882	0.0875215	0.0537576	0.0880021	0.120204	0.0542382	0.0673353	0.0797114	0.0791106	0.0735834	0.0731028	0.0757462	0.110592	0.0606065	0.0785098	0.0363349	0.117681	0.0819943	0.0469087	0.087161	0.0940099	0.0721415	0.0977348	0.0902851	0.0762268	0.0950914	0.107828	0.0675756	0.140991	0.122968	0.0876417	0.104824	0.0491917	0.0621685
cg00136105	0.026137	0.0412816	0.0315891	0.0259351	0.034618	0.0287621	0.0378488	0.0309833	0.0267428	0.0437047	0.0243197	0.031791	0.023512	0.0251274	0.0237139	0.0305794	0.0301756	0.0293679	0.0255313	0.0223004	0.0239158	0.0334064	0.026339	0.0245216	0.0332045	0.0445124	0.0368392	0.026137	0.0265409	0.0204831	0.0287621	0.023512	0.0210889	0.0231081	0.0374449	0.0311852	0.0293679	0.0227043	0.0265409	0.0332045	0.0269448	0.0225024	0.0283582	0.0283582	0.0281563	0.034416	0.0287621	0.0212908	0.0253293
cg00136405	0.722781	0.881929	0.251413	0.177473	0.781528	0.441328	0.433225	0.348903	0.581485	0.407523	0.301044	0.659603	0.165445	0.194819	0.149619	0.304843	0.242677	0.275976	0.181398	0.332697	0.181398	0.389291	0.773552	0.944728	0.253819	0.771906	0.339787	0.223559	0.240525	0.180892	0.425122	0.202669	0.543375	0.708348	0.832045	0.379795	0.329152	0.340926	0.263821	0.241284	0.2661	0.262175	0.28813	0.242551	0.43639	0.215076	0.251033	0.149619	0.262175
cg00136477	0.500362	0.344699	0.33204	0.269681	0.496142	0.333446	0.364743	0.339659	0.402604	0.543145	0.3556	0.336494	0.38256	0.3059	0.238736	0.474105	0.334267	0.542442	0.376816	0.336025	0.423468	0.343644	0.408347	0.290076	0.375878	0.458047	0.397446	0.329461	0.346223	0.404362	0.229827	0.409988	0.598823	0.811804	0.51138	0.55768	0.441754	0.408699	0.385373	0.42464	0.575966	0.371424	0.443512	0.375175	0.288904	0.41456	0.301798	0.30508	0.427453
cg00138126	0.559043	0.720876	0.62374	0.71188	0.653998	0.618924	0.633372	0.649182	0.762129	0.560497	0.467632	0.597661	0.716878	0.651727	0.553773	0.62265	0.618015	0.725873	0.5744	0.574945	0.644821	0.49253	0.546686	0.371587	0.687982	0.542688	0.722057	0.53351	0.40439	0.743865	0.689527	0.776849	0.59121	0.683712	0.50725	0.539871	0.591846	0.563496	0.555136	0.499617	0.61847	0.705883	0.65836	0.637733	0.664721	0.632554	0.627193	0.776667	0.635189
cg00141162	0.601582	0.696116	0.716131	0.821063	0.514154	0.724536	0.729995	0.739267	0.612587	0.587545	0.731555	0.523079	0.748625	0.726009	0.697415	0.615966	0.621511	0.789609	0.599329	0.59647	0.826955	0.676793	0.568916	0.766388	0.703134	0.757289	0.494052	0.628443	0.686151	0.635029	0.848617	0.430971	0.318848	0.766301	0.511728	0.540668	0.70504	0.583126	0.776265	0.713792	0.640487	0.508435	0.619692	0.479928	0.54838	0.673327	0.671941	0.719511	0.514414
cg00141845	0.091236	0.125901	0.170752	0.102315	0.252947	0.111606	0.110177	0.137337	0.134657	0.222035	0.118218	0.0521037	0.0388808	0.0594298	0.0381661	0.19005	0.0835525	0.0881984	0.113929	0.161639	0.113036	0.312629	0.21989	0.0478152	0.0990982	0.223107	0.459688	0.139303	0.186119	0.116252	0.109819	0.0948098	0.244013	0.075869	0.198448	0.205595	0.0653265	0.281001	0.0326268	0.128045	0.0612167	0.457722	0.119111	0.29065	0.114823	0.193802	0.154848	0.0217269	0.113036
cg00143376	0.445957	0.128303	0.494949	0.239818	0.456595	0.533583	0.266787	0.383807	0.573056	0.400418	0.443064	0.586774	0.18896	0.381941	0.137448	0.355439	0.404897	0.302341	0.310646	0.274905	0.400885	0.228806	0.374102	0.135115	0.488137	0.572216	0.585561	0.520518	0.538622	0.638659	0.509973	0.603851	0.540302	0.578655	0.337055	0.429813	0.194092	0.45221	0.16535	0.197825	0.666561	0.501855	0.624288	0.486737	0.526304	0.450436	0.486271	0.571003	0.286477
cg00143998	0.0369097	0.0448016	0.0352483	0.0347291	0.291941	0.0371174	0.0357675	0.0248642	0.030887	0.0362867	0.0291217	0.026318	0.0267334	0.0299524	0.0280833	0.0323407	0.0362867	0.0326523	0.0295371	0.0306793	0.0212298	0.430568	0.0329638	0.026318	0.0531088	0.034106	0.0378443	0.441056	0.0318215	0.0273564	0.0292255	0.0275641	0.0270449	0.0247604	0.0326523	0.178029	0.0317177	0.0300563	0.0273564	0.100045	0.2719	0.0286025	0.0305755	0.0351444	0.0337945	0.0330676	0.0325484	0.0209183	0.0358713
cg00145118	0.2671	0.12592	0.156548	0.0793458	0.40896	0.0985976	0.100251	0.217998	0.281004	0.231902	0.306867	0.159465	0.146241	0.131559	0.110265	0.22179	0.231513	0.096653	0.234138	0.266322	0.0625248	0.222665	0.295977	0.0860548	0.118919	0.265058	0.474397	0.290727	0.0802209	0.131754	0.060094	0.230735	0.338176	0.0685531	0.242597	0.208761	0.176091	0.378527	0.112307	0.087805	0.135448	0.414016	0.176188	0.254751	0.161312	0.156353	0.131656	0.0675808	0.153922
cg00145348	0.45963	0.0234945	0.443929	0.459718	0.489016	0.377789	0.010249	0.0306874	0.262878	0.0187577	0.0163016	0.0137578	0.466911	0.0105999	0.549542	0.0134946	0.476472	0.483227	0.00989818	0.031126	0.00402104	0.0255121	0.0249857	0.475858	0.439017	0.0517399	0.511648	0.015863	0.0131438	0.00516138	0.310071	0.0956868	0.00454735	0.0125297	0.415333	0.448753	0.00928415	0.0141087	0.531209	0.0198981	0.441297	0.461823	0.499191	0.0139332	0.0248103	0.0184069	0.501034	0.000424587	0.419192
cg00146096	0.0131301	0.0156196	0.0152181	0.0162621	0.0156196	0.0139332	0.0129695	0.0137726	0.0128089	0.0128892	0.0119255	0.0128089	0.013371	0.0116043	0.0121664	0.0132907	0.0132907	0.0151378	0.0146559	0.0139332	0.0111224	0.014415	0.012327	0.0158606	0.0130498	0.014415	0.0163424	0.0118452	0.0134513	0.0120861	0.0120058	0.0121664	0.0114437	0.0131301	0.0126483	0.0139332	0.0128089	0.0156196	0.0124073	0.0152984	0.0148166	0.0145756	0.0145756	0.0142544	0.014415	0.0121664	0.454177	0.011524	0.0136923
cg00149659	0.0427568	0.0247327	0.0337448	0.0341544	0.0378412	0.0239134	0.0386604	0.11854	0.0386604	0.0296484	0.0280098	0.0189978	0.0329255	0.0321062	0.040299	0.0329255	0.0362026	0.0349737	0.0267809	0.0292387	0.0439857	0.0362026	0.0468532	0.0284195	0.0390701	0.0525882	0.0603713	0.021046	0.0521785	0.0603713	0.0480821	0.0476725	0.059552	0.0468532	0.0644677	0.0636484	0.0431665	0.0337448	0.0185881	0.0443954	0.0570942	0.0280098	0.0435761	0.035793	0.0534074	0.0292387	0.0312869	0.0267809	0.0386604
cg00149976	0.0355997	0.0334725	0.0425129	0.0427788	0.0592642	0.0409175	0.0300159	0.0350679	0.0334725	0.034802	0.0305477	0.0310795	0.0257616	0.0313454	0.0244321	0.037195	0.0374609	0.0390563	0.0281546	0.0334725	0.0262934	0.034802	0.0308136	0.0313454	0.0313454	0.0454377	0.0326748	0.0305477	0.0355997	0.02975	0.0284205	0.0379927	0.0233686	0.0313454	0.0387904	0.0382586	0.0345361	0.0300159	0.0292182	0.0390563	0.0374609	0.0334725	0.0379927	0.0350679	0.0337384	0.0358656	0.0369291	0.0249639	0.0318772
cg00151234	0.403305	0.0178811	0.46598	0.412126	0.502377	0.319089	0.0270733	0.0241021	0.261429	0.0278161	0.0260519	0.0180668	0.462544	0.0241021	0.545831	0.0256805	0.440631	0.454466	0.0251234	0.025402	0.0221522	0.0241021	0.0290232	0.465887	0.437103	0.0536287	0.291791	0.0248449	0.0303231	0.0224308	0.234595	0.0445293	0.020388	0.018531	0.442581	0.461337	0.018531	0.0282804	0.50832	0.0228022	0.467001	0.465515	0.466444	0.0340371	0.0238235	0.0284661	0.571365	0.0154669	0.396527
cg00151607	0.0240665	0.0114734	0.0116983	0.0150714	0.0193441	0.013947	0.0215929	0.0191192	0.0209182	0.023167	0.0051768	0.0150714	0.00765046	0.0119231	0.00742558	0.0179948	0.0292387	0.0179948	0.0191192	0.0155212	0.00427729	0.0193441	0.0220426	0.0222675	0.0188943	0.0193441	0.0204685	0.00562656	0.0168704	0.00292802	0.00810021	0.0143968	0.00832509	0.0204685	0.0210981	0.0202436	0.0164207	0.0285641	0.0186695	0.0182197	0.0130475	0.0278895	0.0112485	0.0238417	0.0128226	0.0132724	0.0157461	0.000454367	0.0188943
cg00155167	0.0647057	0.0409404	0.0492255	0.0483534	0.0572927	0.0492255	0.052714	0.0505337	0.0470452	0.0540222	0.0437748	0.0435568	0.0359257	0.031129	0.0337454	0.0520599	0.0396322	0.0553304	0.0365798	0.0363618	0.0341814	0.0555484	0.0531501	0.052278	0.0481354	0.0490075	0.0439928	0.0433387	0.0435568	0.0248061	0.0354896	0.0302569	0.0402863	0.0505337	0.0361437	0.0603451	0.0400683	0.0459551	0.0359257	0.045083	0.0684122	0.0514059	0.0405043	0.0548943	0.052496	0.0315651	0.0538042	0.0326552	0.0402863
cg00155485	0.0212153	0.0203114	0.0225209	0.0282452	0.0189054	0.024429	0.0211149	0.0186042	0.020211	0.0247303	0.0177003	0.0154909	0.0201106	0.0234247	0.0194076	0.0217174	0.0215166	0.0313585	0.0191063	0.0268393	0.0184033	0.0190059	0.0214161	0.0226213	0.0200102	0.0407987	0.025835	0.0200102	0.0227217	0.0191063	0.0233243	0.016696	0.0174995	0.0215166	0.0229226	0.028647	0.0224204	0.0246298	0.020211	0.0294504	0.0250315	0.0221191	0.0270401	0.02232	0.0233243	0.0247303	0.0215166	0.0153905	0.0187046
cg00155609	0.0392594	0.0348688	0.035496	0.0360336	0.039797	0.0411411	0.0857638	0.0325391	0.0335247	0.0372881	0.11605	0.0370193	0.0338832	0.0385426	0.0324495	0.0377361	0.035944	0.0396178	0.0404242	0.0397074	0.0333455	0.0374673	0.0362129	0.0404242	0.0371089	0.0381841	0.0380049	0.0337039	0.0377361	0.0340624	0.0335247	0.0570905	0.0336143	0.0351376	0.0474133	0.0363025	0.0409619	0.0381841	0.034152	0.039349	0.0418579	0.0386322	0.0368401	0.0348688	0.0358544	0.0369297	0.0367505	0.0351376	0.0380945
cg00156216	0.0162272	0.0179917	0.0179917	0.0217993	0.0242139	0.01567	0.0173416	0.0168773	0.0252355	0.0285788	0.0272786	0.0167844	0.0191061	0.0171559	0.0147413	0.01632	0.0181774	0.0173416	0.0144627	0.0150199	0.0139054	0.0139983	0.0151127	0.0185489	0.0306219	0.0176202	0.0157628	0.0177131	0.019199	0.0452024	0.018456	0.0145555	0.0171559	0.0154842	0.0179917	0.0187347	0.019942	0.0174345	0.0164129	0.018456	0.0165987	0.0189204	0.0185489	0.0171559	0.0300647	0.0154842	0.0164129	0.0144627	0.0179917
cg00156744	0.0342509	0.0350976	0.0413422	0.0299115	0.0337217	0.0339334	0.040813	0.0391195	0.040813	0.0424006	0.0291706	0.0352035	0.0268421	0.03224	0.0264188	0.185178	0.0413422	0.0325575	0.03351	0.0337217	0.0264188	0.0415538	0.0584882	0.0366852	0.0368969	0.0495977	0.0449407	0.0268421	0.0360502	0.0254662	0.0270538	0.0367911	0.0267363	0.0346743	0.0531962	0.0337217	0.0394371	0.0394371	0.0281122	0.0385903	0.0334042	0.0352035	0.0320283	0.0314991	0.0319224	0.0363677	0.0372144	0.0231377	0.0340392
cg00158308	0.0679623	0.0552948	0.0659566	0.0512834	0.0997366	0.0659566	0.0552948	0.0493833	0.0529724	0.160963	0.0580394	0.0483276	0.0510723	0.0928751	0.0503333	0.0651121	0.051389	0.0538169	0.0443163	0.072607	0.0439996	0.16033	0.0448441	0.0511778	0.261459	0.661646	0.122433	0.0524446	0.0467442	0.0475887	0.0439996	0.0580394	0.160118	0.0439996	0.0672234	0.0807354	0.0653232	0.0563504	0.0484332	0.0551892	0.0518112	0.0828466	0.0511778	0.0751405	0.0593062	0.0561393	0.144812	0.0527613	0.111032
cg00160914	0.119657	0.0682587	0.0815429	0.0661481	0.0870056	0.0860124	0.07099	0.101531	0.211157	0.132073	0.0763286	0.0584508	0.0969377	0.0695002	0.0524915	0.0861365	0.0683829	0.0681346	0.0570851	0.0666447	0.0598164	0.138777	0.0781908	0.095572	0.0804256	0.171056	0.103394	0.0882471	0.0626719	0.0595681	0.0584508	0.0769493	0.109105	0.118664	0.181733	0.10389	0.0572092	0.0969377	0.150074	0.0683829	0.0811705	0.158144	0.067638	0.0968135	0.0811705	0.13021	0.152433	0.0383382	0.120278
cg00162401	0.0336757	0.0297622	0.0315296	0.0239551	0.0639734	0.0272374	0.0311508	0.0533692	0.0389778	0.0374629	0.0382203	0.0267324	0.0237026	0.0252175	0.0263537	0.0378416	0.0305196	0.0356955	0.0264799	0.0225665	0.0239551	0.0550103	0.0290048	0.035443	0.0319083	0.0350643	0.0398615	0.0267324	0.0334232	0.0219353	0.0288785	0.0474359	0.0245863	0.0348118	0.0484458	0.032792	0.0356955	0.035443	0.0264799	0.0326657	0.0310246	0.0950286	0.0262275	0.0312771	0.0233239	0.0377154	0.0528643	0.018653	0.0399877
cg00162643	0.0377664	0.0377664	0.0343831	0.0247973	0.0477281	0.0319397	0.0321276	0.0650202	0.025925	0.0529909	0.017091	0.0197224	0.00374606	0.0279926	0.0152115	0.0381423	0.0133319	0.030436	0.0247973	0.0595694	0.0097607	0.113513	0.0368266	0.0383302	0.0356988	0.02179	0.0381423	0.0135198	0.039458	0.00562563	0.0244214	0.017279	0.0107005	0.0345711	0.0652082	0.0276167	0.0387062	0.0236696	0.0107005	0.0240455	0.030624	0.0283685	0.0200984	0.043969	0.0249853	0.0435931	0.0670877	0.00750521	0.0512993
cg00164898	0.0358777	0.0399477	0.0321617	0.0319847	0.0398592	0.0337543	0.0317193	0.0342851	0.0341082	0.0334003	0.0294188	0.0356123	0.0331349	0.0319847	0.0304806	0.0310999	0.0398592	0.0293304	0.028888	0.0319847	0.030923	0.034639	0.0312769	0.0431329	0.0337543	0.0486185	0.028888	0.0308345	0.0315423	0.0314538	0.0325156	0.0289765	0.0320732	0.0337543	0.0312769	0.0360547	0.0290649	0.044814	0.0322501	0.0424251	0.036674	0.0394168	0.0296843	0.0300382	0.0326925	0.0297728	0.0403901	0.0263221	0.0364086
cg00165981	0.112278	0.10165	0.0873861	0.240092	0.1106	0.0848689	0.0831909	0.112278	0.0840299	0.112278	0.0504681	0.0647319	0.0515868	0.0773175	0.043476	0.0725629	0.104167	0.10137	0.0552227	0.146119	0.0507478	0.103328	0.0577398	0.125702	0.100811	0.115354	0.110879	0.0524259	0.0694864	0.0627741	0.0778769	0.0560617	0.0546633	0.0778769	0.0616554	0.086547	0.138008	0.0901829	0.0518665	0.0862674	0.135771	0.0843096	0.145001	0.0938188	0.120668	0.116193	0.0907423	0.0431964	0.0759191
cg00167504	0.0349588	0.0377329	0.0389422	0.0316156	0.0564407	0.0363814	0.0394401	0.0360258	0.0358835	0.0378041	0.032896	0.032896	0.0303352	0.0338207	0.0340341	0.0347454	0.0368794	0.0331093	0.0339629	0.0309754	0.0326114	0.0392979	0.0370216	0.0351011	0.0352433	0.0339629	0.0348877	0.0325403	0.0353856	0.0321846	0.0327537	0.0341052	0.0321846	0.0365237	0.0400092	0.0384443	0.0386577	0.0341763	0.0373773	0.0360969	0.0330382	0.0351011	0.0327537	0.0387288	0.033465	0.0373773	0.0368082	0.0301929	0.0381597
cg00168082	0.0469608	0.0401016	0.0442621	0.0447119	0.0490973	0.0441496	0.0431376	0.0594423	0.0622535	0.0640526	0.0390895	0.0335797	0.0278449	0.0429127	0.0307685	0.0549445	0.0353788	0.0459488	0.037178	0.0347041	0.0294192	0.0788955	0.0410011	0.0531453	0.0461737	0.03819	0.0487599	0.0317805	0.0450492	0.0280698	0.0335797	0.031893	0.0327925	0.0447119	0.0730483	0.0472981	0.0441496	0.0443745	0.0336921	0.0405513	0.0387522	0.046511	0.0462861	0.049547	0.042238	0.051796	0.0929513	0.0291943	0.0540449
cg00168785	0.0528136	0.0474549	0.063276	0.0512826	0.133833	0.0557482	0.0729729	0.0868802	0.0805007	0.0849664	0.0650623	0.0849664	0.0540895	0.0525585	0.0586828	0.0674865	0.0597035	0.0429892	0.0597035	0.0843284	0.0403098	0.0577897	0.0871354	0.0409478	0.0523033	0.0529412	0.0824146	0.105764	0.0486032	0.0600863	0.0403098	0.091601	0.0500067	0.0471997	0.0577897	0.0903251	0.0711866	0.0982357	0.0537068	0.0597035	0.0510274	0.068252	0.0779489	0.107295	0.0674865	0.0538344	0.0990013	0.0376304	0.081649
cg00168942	0.407141	0.525906	0.704055	0.874362	0.386582	0.8932	0.63597	0.864322	0.571615	0.416225	0.821099	0.555359	0.335614	0.558323	0.703003	0.751198	0.377306	0.496454	0.311803	0.435159	0.52189	0.291913	0.598007	0.199157	0.502096	0.624304	0.522655	0.370803	0.456292	0.719642	0.732073	0.577639	0.390502	0.384191	0.634632	0.542641	0.618662	0.464898	0.288566	0.397387	0.294495	0.548665	0.405324	0.72777	0.481441	0.510607	0.867669	0.936805	0.313333
cg00171126	0.0519799	0.059444	0.0407837	0.034755	0.0511187	0.0664775	0.0445158	0.0694919	0.0568603	0.054133	0.0295876	0.0300182	0.0218363	0.0390612	0.0314536	0.0445158	0.0311665	0.0420756	0.0267167	0.0415014	0.0196832	0.0717886	0.0321713	0.0496833	0.0422191	0.0425062	0.0637503	0.0228411	0.0338938	0.0221234	0.0261426	0.040066	0.0225541	0.0376258	0.0618842	0.0394919	0.0515493	0.0481043	0.0225541	0.0377694	0.0423627	0.0308794	0.0307359	0.0370517	0.0394919	0.045377	0.0559991	0.0182478	0.046956
cg00171161	0.0622173	0.0766656	0.0583644	0.0343802	0.0682856	0.0491175	0.0623136	0.0792663	0.062121	0.0808075	0.0584607	0.0566306	0.0492138	0.0516219	0.0495991	0.0625063	0.0566306	0.0478653	0.0546078	0.0536446	0.0544152	0.0830229	0.0644327	0.0570159	0.0568232	0.0497917	0.050177	0.0508513	0.0473837	0.0432418	0.0521035	0.0425676	0.0527777	0.0745465	0.0806148	0.0616394	0.0538373	0.0574975	0.0495991	0.0610614	0.0580754	0.0449756	0.0467094	0.0712716	0.0592313	0.0601945	0.0785921	0.033417	0.0545115
cg00174500	0.644329	0.262157	0.415296	0.666954	0.511704	0.467552	0.535089	0.343285	0.80017	0.619087	0.784383	0.347506	0.541758	0.470422	0.34759	0.488911	0.404321	0.859771	0.39571	0.381612	0.791812	0.250084	0.550875	0.233285	0.516347	0.611996	0.305127	0.750024	0.321927	0.447713	0.288411	0.506977	0.466624	0.899026	0.493047	0.489079	0.449655	0.299133	0.343623	0.345564	0.771382	0.56185	0.805151	0.597222	0.56987	0.386255	0.597054	0.586923	0.376462
cg00174901	0.411327	0.483224	0.228036	0.280493	0.580012	0.404024	0.472629	0.141945	0.710949	0.324104	0.684823	0.468927	0.417087	0.408961	0.39127	0.264036	0.454424	0.474275	0.427887	0.167762	0.087431	0.393944	0.245522	0.130425	0.490321	0.626606	0.35455	0.504001	0.522206	0.539589	0.513155	0.394664	0.169614	0.180002	0.338607	0.376767	0.276482	0.502252	0.468207	0.252825	0.690891	0.644503	0.562115	0.194916	0.34879	0.461521	0.687806	0.130219	0.177019
cg00176210	0.35119	0.58771	0.450589	0.22853	0.460085	0.491621	0.232363	0.446234	0.328191	0.58954	0.224435	0.738683	0.426807	0.195339	0.611755	0.567412	0.495019	0.214853	0.525858	0.49406	0.566106	0.737115	0.643204	0.398755	0.369223	0.734153	0.614978	0.732236	0.765254	0.257888	0.839302	0.364083	0.55722	0.494322	0.267035	0.503905	0.245518	0.629178	0.309984	0.241423	0.753754	0.631704	0.271043	0.278012	0.686762	0.276095	0.732062	0.371401	0.304582
cg00176879	0.892896	0.915896	0.910033	0.90372	0.900112	0.894249	0.913641	0.922661	0.922661	0.9177	0.927171	0.919053	0.923112	0.909582	0.924014	0.913641	0.908681	0.910484	0.920857	0.859974	0.924916	0.914543	0.913641	0.893798	0.92221	0.916798	0.905524	0.924014	0.919504	0.92221	0.925367	0.922661	0.920406	0.921308	0.907328	0.892896	0.90823	0.891994	0.919955	0.881621	0.878014	0.904622	0.866288	0.910935	0.907328	0.91319	0.912739	0.929426	0.915896
cg00177013	0.0662612	0.0793207	0.0703202	0.0520545	0.0477307	0.0558488	0.0491426	0.0843504	0.0699672	0.0504662	0.0315828	0.0637022	0.0262884	0.0699672	0.0314063	0.072438	0.0612315	0.0736733	0.061055	0.0561135	0.0344065	0.0598196	0.0476425	0.0643199	0.0704084	0.0928214	0.0967922	0.033877	0.0659964	0.0285826	0.0381126	0.0614079	0.0319357	0.0742028	0.0996159	0.0619374	0.0716438	0.0562018	0.0644081	0.0788795	0.0473778	0.05629	0.0559371	0.0569959	0.0659082	0.10094	0.0606138	0.0330829	0.0555841
cg00177698	0.0509512	0.06443	0.0275615	0.0281561	0.0396528	0.0382653	0.0350938	0.0582853	0.0531316	0.0339045	0.018047	0.0251829	0.0122987	0.0404457	0.010713	0.109624	0.0531316	0.0463922	0.0224078	0.0253811	0.0124969	0.11002	0.0245882	0.0572942	0.026174	0.0339045	0.0515459	0.0162631	0.0297419	0.0140827	0.00952365	0.0303365	0.0119023	0.033508	0.0687908	0.0432207	0.0446082	0.0459958	0.0370759	0.0465904	0.0263722	0.0317241	0.0277597	0.0295437	0.0311294	0.0436171	0.0509512	0.00972187	0.0374724
cg00177923	0.0333137	0.0304271	0.0225545	0.0325265	0.0317392	0.0267532	0.0225545	0.0312144	0.0249163	0.027278	0.0215048	0.0270156	0.0343634	0.0375125	0.030952	0.0314768	0.0236041	0.0270156	0.0257035	0.0335762	0.0225545	0.0299023	0.027278	0.0264908	0.0288526	0.0348883	0.0264908	0.0207175	0.0246538	0.027278	0.0333137	0.0254411	0.0267532	0.027278	0.0322641	0.030952	0.0314768	0.0312144	0.0288526	0.0438106	0.0401367	0.0301647	0.0398743	0.0304271	0.034101	0.0348883	0.0322641	0.0175684	0.0257035
cg00179446	0.196135	0.0617317	0.510003	0.264392	0.330872	0.385699	0.0530748	0.0865925	0.231096	0.0791565	0.0656162	0.0423092	0.504676	0.0560714	0.613997	0.0933626	0.20113	0.207012	0.0642844	0.0742731	0.0558494	0.0989119	0.0733852	0.090366	0.236756	0.0995778	0.150409	0.0623976	0.0717204	0.0599559	0.234869	0.0682799	0.0537407	0.0503002	0.238643	0.354623	0.0530748	0.0955824	0.212228	0.0626196	0.364057	0.550291	0.240863	0.105793	0.0622866	0.0645063	0.611555	0.035761	0.237755
cg00180012	0.0458413	0.0336985	0.0435995	0.0372479	0.0503247	0.042105	0.0464017	0.0548082	0.048083	0.0536873	0.0299623	0.0357535	0.0297755	0.0279074	0.0314568	0.0551818	0.0460281	0.0501379	0.0363139	0.0393029	0.0280942	0.0800277	0.0445336	0.0535005	0.045094	0.0426655	0.0452808	0.0366875	0.0467753	0.03127	0.0331381	0.0376216	0.0338853	0.0417314	0.0615334	0.0432259	0.0370611	0.0471489	0.0385556	0.0477094	0.0437863	0.0393029	0.0374348	0.0531269	0.0320172	0.0449072	0.0561159	0.0237976	0.0503247
cg00180631	0.416687	0.15743	0.49455	0.528454	0.519042	0.409949	0.139355	0.215079	0.31476	0.247593	0.119569	0.106199	0.451661	0.0878033	0.605568	0.171014	0.520968	0.505459	0.181923	0.172511	0.0337915	0.128018	0.171228	0.538615	0.501395	0.215293	0.298396	0.207913	0.13497	0.0743271	0.248235	0.174436	0.0925093	0.111868	0.377863	0.505352	0.130799	0.189196	0.56514	0.081707	0.467918	0.493587	0.25401	0.229625	0.136788	0.165024	0.569418	0.0249143	0.395831
cg00183916	0.0203731	0.0200842	0.0350099	0.0227805	0.514848	0.0257656	0.0220101	0.017388	0.693571	0.0408839	0.5057	0.0195065	0.0217212	0.0210472	0.0208546	0.0262471	0.0214324	0.0570615	0.018062	0.0296174	0.0177732	0.0414617	0.0185435	0.0282693	0.0312544	0.019699	0.0209509	0.0162324	0.0261508	0.0170991	0.0586985	0.182919	0.018062	0.0191213	0.026536	0.370213	0.0261508	0.0195065	0.0192176	0.0211435	0.0410765	0.51687	0.0210472	0.5005	0.0250916	0.0997202	0.67826	0.016425	0.0214324
cg00184884	0.0242278	0.0187736	0.0225136	0.0183061	0.0248512	0.0217345	0.0237603	0.0190852	0.023137	0.0234487	0.0161243	0.0198644	0.0190852	0.0178385	0.0175269	0.025007	0.0209553	0.0204878	0.0201761	0.0187736	0.016436	0.0226695	0.0232928	0.021267	0.0236045	0.017371	0.0220461	0.0147218	0.0226695	0.0148776	0.0198644	0.0186177	0.0175269	0.0299938	0.0256304	0.0228253	0.0198644	0.0225136	0.0195527	0.0246954	0.0176827	0.0215786	0.016436	0.0245395	0.0193969	0.0206436	0.0211111	0.0117609	0.0242278
cg00184893	0.0254354	0.0352461	0.0348828	0.0505072	0.0377896	0.0319759	0.0272522	0.0254354	0.0337927	0.0555942	0.0174415	0.0316125	0.0297957	0.0348828	0.0236186	0.0254354	0.0272522	0.0668583	0.019985	0.0421499	0.029069	0.038153	0.0294324	0.0337927	0.018895	0.075579	0.0305224	0.0232553	0.0337927	0.0283423	0.0356095	0.0225285	0.0250721	0.0225285	0.029069	0.0265255	0.0225285	0.0218018	0.0305224	0.0377896	0.0552309	0.0301591	0.0337927	0.0305224	0.0515973	0.033066	0.0265255	0.0116278	0.0272522
cg00185839	0.0304125	0.0244876	0.0281996	0.0222747	0.0298414	0.0258439	0.0363373	0.0272716	0.0279854	0.0285565	0.021204	0.0254156	0.0215609	0.0259867	0.0218464	0.0285565	0.0267005	0.0255584	0.0281996	0.0227744	0.0195621	0.0306266	0.0276285	0.0272716	0.026415	0.0346955	0.0421908	0.0211326	0.028271	0.0211326	0.0207757	0.0229886	0.0204188	0.0279854	0.0281996	0.026986	0.0256298	0.0305552	0.032554	0.0287706	0.024559	0.0267719	0.0224889	0.0265577	0.0302697	0.0269147	0.026986	0.0177776	0.026986
cg00186141	0.0439053	0.030662	0.0368942	0.052864	0.0462424	0.176338	0.0388417	0.0217033	0.031441	0.0423473	0.0236509	0.0392312	0.027546	0.0400102	0.0333886	0.0341676	0.0439053	0.052085	0.0252089	0.0446843	0.0252089	0.0279355	0.0365047	0.0345571	0.0372837	0.0478004	0.0610437	0.0279355	0.0396207	0.0217033	0.0213138	0.0267669	0.0244299	0.0318305	0.0333886	0.0361151	0.0396207	0.0431263	0.0267669	0.0368942	0.0598752	0.0470214	0.0559801	0.0388417	0.0376732	0.052864	0.0400102	0.0143027	0.0267669
cg00186701	0.630558	0.817983	0.800164	0.860345	0.670408	0.835641	0.541705	0.830538	0.770925	0.529799	0.740956	0.736744	0.816526	0.852083	0.823086	0.441513	0.151951	0.832563	0.769305	0.453986	0.57135	0.693168	0.525182	0.530366	0.196985	0.835074	0.731803	0.699729	0.765174	0.532067	0.888855	0.740632	0.427905	0.751486	0.700377	0.585362	0.588278	0.572565	0.809803	0.482335	0.741442	0.77052	0.611038	0.379632	0.698433	0.66158	0.819522	0.327551	0.180381
cg00186954	0.910069	0.905652	0.928197	0.826425	0.909425	0.9224	0.906573	0.868201	0.897831	0.782625	0.909885	0.804065	0.795507	0.894886	0.907769	0.747842	0.911726	0.80066	0.792654	0.910161	0.848141	0.876299	0.856791	0.757688	0.906757	0.884856	0.517245	0.926264	0.779496	0.886145	0.909701	0.867557	0.85449	0.847865	0.892954	0.842252	0.849429	0.883016	0.692079	0.455133	0.70855	0.922308	0.889089	0.912922	0.901235	0.904272	0.857067	0.768914	0.889825
cg00187380	0.0615761	0.0265037	0.0836277	0.0342742	0.0615761	0.0334341	0.0477151	0.045195	0.0397346	0.160703	0.0493953	0.046035	0.0246135	0.0538056	0.0290238	0.0727069	0.045195	0.0403646	0.0420447	0.0871979	0.0267137	0.0472951	0.0548556	0.0267137	0.031334	0.0382645	0.031334	0.0678766	0.0365844	0.0399446	0.0340642	0.0477151	0.0685066	0.0262936	0.0943384	0.100219	0.106519	0.0409947	0.0273437	0.0422548	0.0636763	0.0323841	0.0504453	0.129621	0.0907682	0.044985	0.0340642	0.0258736	0.074597
cg00187686	0.6093	0.228249	0.927097	0.708156	0.226071	0.34681	0.209196	0.271797	0.849798	0.65176	0.189708	0.229773	0.246104	0.559001	0.186768	0.233474	0.306963	0.545392	0.205277	0.332112	0.159442	0.353778	0.2117	0.273213	0.337229	0.285842	0.399831	0.176317	0.526666	0.212462	0.340278	0.23195	0.191232	0.457859	0.490303	0.467222	0.298035	0.269076	0.803854	0.210067	0.668635	0.237612	0.266136	0.324274	0.208978	0.343871	0.27931	0.162599	0.250023
cg00191052	0.604027	0.259052	0.465382	0.350327	0.740072	0.75538	0.247499	0.478476	0.60393	0.285818	0.248269	0.484253	0.826435	0.255394	0.871495	0.337136	0.722645	0.69973	0.267333	0.473085	0.259726	0.785324	0.293617	0.911066	0.409828	0.301512	0.767704	0.718312	0.258667	0.286685	0.880064	0.284374	0.277827	0.263578	0.402703	0.760291	0.224584	0.300742	0.589007	0.308926	0.957377	0.604797	0.473566	0.508227	0.507746	0.28967	0.887863	0.452769	0.548761
cg00197381	0.0311456	0.0277505	0.0401992	0.0352197	0.0481211	0.0356724	0.0329563	0.0282031	0.0279768	0.0257134	0.0279768	0.024808	0.0193759	0.0302402	0.0191495	0.0320509	0.034088	0.0300139	0.02345	0.034767	0.0180178	0.0399728	0.024808	0.0383884	0.0279768	0.0521952	0.0397465	0.0196022	0.0306929	0.0177915	0.0173388	0.0229973	0.024808	0.033409	0.0311456	0.0392938	0.0438206	0.0377094	0.0232237	0.0388411	0.0336353	0.0313719	0.0327299	0.0320509	0.0315982	0.0343143	0.0363514	0.0173388	0.0252607
cg00197641	0.0561165	0.0432125	0.0564561	0.0751331	0.0758122	0.0707185	0.0384583	0.0462687	0.0496645	0.0432125	0.0401562	0.0544186	0.0496645	0.0632477	0.0483062	0.0547582	0.043552	0.0455895	0.0523811	0.0608707	0.0394771	0.0771705	0.0462687	0.0639269	0.0547582	0.0415146	0.0893955	0.0404958	0.055777	0.0347229	0.0371	0.0455895	0.0340438	0.0472874	0.0751331	0.058154	0.0595123	0.0717373	0.0601915	0.0506832	0.0503437	0.192288	0.0601915	0.0571353	0.0629082	0.055777	0.0720768	0.0374396	0.0601915
cg00199549	0.927859	0.934431	0.942879	0.945696	0.913121	0.939875	0.530671	0.945414	0.941377	0.933773	0.689039	0.94241	0.952173	0.947104	0.950859	0.706782	0.842057	0.941659	0.554328	0.923729	0.954708	0.935839	0.935933	0.941565	0.838959	0.953675	0.953487	0.953206	0.942973	0.734569	0.950389	0.929643	0.708659	0.423371	0.937998	0.9257	0.344609	0.571601	0.67524	0.795494	0.934618	0.516496	0.700586	0.903921	0.899227	0.933304	0.791458	0.962124	0.944194
cg00200063	0.0256504	0.0359079	0.0294378	0.0277019	0.0297534	0.0239146	0.0267551	0.0349611	0.0248614	0.0283332	0.0215475	0.023599	0.0291222	0.0277019	0.0256504	0.025177	0.0275441	0.0254926	0.019496	0.0215475	0.021074	0.0385906	0.0247036	0.0286488	0.0237568	0.0272285	0.0250192	0.0242302	0.0215475	0.0240724	0.0247036	0.020285	0.0247036	0.0223365	0.0256504	0.0229677	0.023599	0.020285	0.0237568	0.0314893	0.0314893	0.025177	0.0254926	0.0299112	0.0381172	0.023599	0.0295956	0.0157086	0.0264395
cg00201234	0.413995	0.458495	0.494858	0.54187	0.417209	0.461709	0.5486	0.511734	0.468138	0.476677	0.475069	0.444733	0.446139	0.632075	0.476174	0.413292	0.445336	0.403849	0.453874	0.346893	0.438806	0.453171	0.376527	0.463819	0.396918	0.505808	0.471755	0.43077	0.529012	0.41058	0.576525	0.417209	0.411986	0.628358	0.146392	0.355834	0.389485	0.354528	0.510127	0.532528	0.435391	0.409575	0.425547	0.444733	0.418817	0.451765	0.455481	0.485516	0.41741
cg00202702	0.0385238	0.0358254	0.0372709	0.0394875	0.0437278	0.0399693	0.0365	0.0353435	0.0350544	0.0388129	0.0339943	0.0346689	0.0337052	0.0359218	0.0340907	0.0361145	0.0352472	0.0363072	0.0378492	0.0392947	0.0339943	0.0371746	0.0346689	0.0366927	0.0363072	0.298629	0.0439205	0.0341871	0.0362109	0.0338016	0.034958	0.0370782	0.0350544	0.0347653	0.0374637	0.0379455	0.038331	0.0359218	0.0328379	0.0375601	0.0399693	0.431621	0.0364036	0.0371746	0.0429568	0.0380419	0.302291	0.0338016	0.038331
cg00202711	0.71251	0.86408	0.774465	0.857038	0.40243	0.79743	0.849995	0.870919	0.769566	0.799472	0.834991	0.743437	0.774873	-0.00257322	0.858977	0.049277	0.455505	0.807739	0.728943	0.735169	0.874491	0.78559	0.76334	0.846729	0.695465	0.778752	0.373545	0.762523	0.834889	0.719757	0.905315	0.726493	0.329248	0.899395	0.68485	0.517664	0.857956	0.711388	0.81468	0.829173	0.849893	0.687096	0.595643	0.641267	0.720676	0.747213	0.779058	0.889393	0.591867
cg00206052	0.033867	0.0301914	0.0329481	0.0255969	0.0295022	0.051326	0.0288131	0.0239889	0.0290428	0.0308806	0.018016	0.0232997	0.0228402	0.0226105	0.020543	0.0361642	0.0239889	0.0308806	0.0159485	0.0363939	0.0191647	0.0274347	0.0274347	0.0697039	0.0258266	0.0531638	0.0299617	0.0249077	0.0265158	0.024678	0.0375426	0.0278942	0.0242186	0.0237591	0.0265158	0.0267455	0.0276644	0.035475	0.0460423	0.0292725	0.0331778	0.0198538	0.0295022	0.0357048	0.0283536	0.0249077	0.0285833	0.0102054	0.0345561
cg00207534	0.0354153	0.0187114	0.01433	0.0258311	0.0255572	0.0348676	0.0233665	0.0324031	0.0321292	0.0233665	0.00803182	0.00693648	9.06196e-05	0.0255572	-0.00593374	0.0636202	0.0154253	0.0296647	0.0167945	0.015973	-0.00210006	0.0658109	0.0170684	0.0272002	0.0214497	0.022545	0.0849793	-0.00182622	0.0211759	0.0031028	0.00255513	0.0118655	0.00200746	0.0206282	0.058965	0.0170684	0.0184375	0.0373321	9.06196e-05	0.0239142	0.0187114	0.0151515	0.0241881	0.0285694	0.0132347	0.0178899	0.045821	-0.0103151	0.0315816
cg00208830	0.301936	0.226887	0.226267	0.133334	0.377295	0.221512	0.202181	0.172926	0.288084	0.314961	0.260173	0.255832	0.255418	0.188225	0.196702	0.285913	0.254591	0.153079	0.27661	0.238568	0.16445	0.315995	0.252317	0.144705	0.247458	0.230195	0.365924	0.272888	0.177888	0.290979	0.154112	0.476947	0.565332	0.17489	0.379776	0.526257	0.194738	0.27847	0.2763	0.183677	0.180783	0.245598	0.253557	0.297284	0.280331	0.306278	0.210761	0.16662	0.347214
cg00208967	0.328363	0.775277	0.310034	0.125383	0.303122	0.52108	0.345435	0.23609	0.802089	0.276204	0.665617	0.252219	0.484945	0.136904	0.427654	0.300817	0.686774	0.116794	0.63252	0.129572	0.744903	0.384398	0.188853	0.295057	0.135856	0.920861	0.571458	0.768469	0.754434	0.360622	0.447135	0.655772	0.158375	0.127373	0.318518	0.381675	0.25599	0.655981	0.181836	0.144026	0.589997	0.721232	0.365545	0.567583	0.414353	0.128211	0.737048	0.10653	0.185502
cg00209066	0.919727	0.930853	0.939545	0.915786	0.925058	0.943602	0.881828	0.820171	0.9414	0.90211	0.902342	0.928071	0.92784	0.936184	0.889362	0.93178	0.92981	0.900835	0.875106	0.944181	0.931664	0.771494	0.902806	0.874643	0.914048	0.90721	0.893418	0.948817	0.906051	0.907789	0.953685	0.93433	0.904312	0.866762	0.92019	0.897127	0.951367	0.910455	0.936995	0.927492	0.913352	0.952526	0.925174	0.890752	0.937923	0.938502	0.925753	0.928998	0.906862
cg00209951	0.0415617	0.0265513	0.0693621	0.0445816	0.237763	0.0472461	0.0321469	0.0304593	0.604142	0.0705167	0.53886	0.0337456	0.0239755	0.0480455	0.0163371	0.0378313	0.0341897	0.0489337	0.0176694	0.0429828	0.0318804	0.0697174	0.0400518	0.039963	0.0489337	0.0487561	0.0436045	0.617021	0.0550622	0.0211333	0.0340121	0.0274395	0.0167812	0.0631448	0.0540852	0.0556839	0.0428052	0.0417393	0.0287718	0.0367655	0.0750465	0.552805	0.0632336	0.0550622	0.038986	0.0435157	0.393552	0.0765564	0.0447592
cg00210842	0.0283178	0.0274832	0.0272555	0.0239929	0.0443275	0.0271038	0.0400785	0.0333256	0.0426583	0.0359054	0.0230065	0.031884	0.0185299	0.0249034	0.0179229	0.0276349	0.0274073	0.0261174	0.0374229	0.0228548	0.0174676	0.0307458	0.0306699	0.0253587	0.0272555	0.0448587	0.0382575	0.0223236	0.0294559	0.018454	0.0185299	0.0286972	0.022096	0.0279384	0.0333256	0.0261174	0.0290766	0.0394715	0.0260415	0.0249793	0.0261933	0.038561	0.0242964	0.0319598	0.0271797	0.0290007	0.0256622	0.0157225	0.0307458
cg00211661	0.0397773	0.0379325	0.0365218	0.247695	0.326803	0.0406454	0.0376069	0.0368473	0.0397773	0.0351111	0.0412965	0.0363047	0.0369558	0.0393432	0.0391262	0.0401028	0.0367388	0.0420561	0.0368473	0.0403198	0.037824	0.0374984	0.0393432	0.0446605	0.0365218	0.0397773	0.666676	0.637594	0.0388006	0.0364133	0.0397773	0.0408624	0.0356536	0.0383665	0.433041	0.0397773	0.038258	0.0392347	0.0356536	0.041622	0.0460712	0.0379325	0.0395602	0.0399943	0.0423817	0.0391262	0.599396	0.656042	0.0399943
cg00213331	0.939892	0.93551	0.932927	0.946744	0.93068	0.928545	0.950901	0.937757	0.950564	0.930567	0.94124	0.9518	0.958989	0.958652	0.934724	0.941801	0.950564	0.93259	0.955731	0.909672	0.943823	0.938656	0.938881	0.923041	0.945059	0.9518	0.956181	0.935173	0.947643	0.942812	0.917985	0.94798	0.93933	0.933938	0.947755	0.934612	0.936971	0.924501	0.955956	0.934612	0.946969	0.940229	0.917424	0.924389	0.914615	0.931017	0.95326	0.948092	0.933825
cg00214855	0.0517079	0.207872	0.066294	0.073618	0.237727	0.0844179	0.0914937	0.172555	0.203527	0.122218	0.052701	0.0742387	0.0302322	0.0611423	0.029115	0.083611	0.0747353	0.106514	0.0875834	0.124266	0.0306667	0.0767835	0.113342	0.0739284	0.0920523	0.160576	0.172058	0.0759146	0.0653629	0.0337701	0.0313495	0.0895696	0.0346391	0.0641216	0.057232	0.0736801	0.0882041	0.0693353	0.0756042	0.0811283	0.114335	0.0520803	0.0883903	0.0557423	0.0505286	0.0760387	0.0692732	0.0186254	0.0584113
cg00215066	0.930695	0.95682	0.944691	0.947256	0.910635	0.944691	0.933728	0.946557	0.94609	0.949356	0.951688	0.939559	0.946557	0.965917	0.952388	0.955887	0.933728	0.92743	0.902705	0.939326	0.928596	0.952621	0.888943	0.930229	0.948889	0.956353	0.953088	0.938626	0.938393	0.932561	0.961018	0.943991	0.937226	0.965917	0.949356	0.944691	0.947956	0.939792	0.95612	0.909236	0.963118	0.947256	0.955187	0.914134	0.931162	0.947023	0.920665	0.954021	0.958219
cg00216361	0.0439127	0.0474156	0.321308	0.0434393	0.0548949	0.0536641	0.0444808	0.0495932	0.43236	0.0572618	0.378207	0.13461	0.0448594	0.0434393	0.0543269	0.0553683	0.0549896	0.0464689	0.0448594	0.0500665	0.0382323	0.051392	0.201734	0.0450488	0.0499718	0.243012	0.047605	0.0626582	0.0583032	0.0538535	0.0440074	0.0413565	0.0471316	0.0465636	0.0512973	0.0564097	0.0459009	0.0848119	0.443343	0.048173	0.107723	0.215083	0.0396524	0.0523387	0.0383269	0.0464689	0.541236	0.0326465	0.0534748
cg00216758	0.0555743	0.0932448	0.0750945	0.0757794	0.0569442	0.0610537	0.0631084	0.0624235	0.0464992	0.0768068	0.0420472	0.0542045	0.0453006	0.0624235	0.0464992	0.0576291	0.0589989	0.0550606	0.0490676	0.0679028	0.0398212	0.0788615	0.0499238	0.0531771	0.0507799	0.062081	0.100779	0.0363966	0.0470129	0.037424	0.0504374	0.0401637	0.0399925	0.0624235	0.0562592	0.0458143	0.0596838	0.0506087	0.0518073	0.0547182	0.0759506	0.062081	0.0603687	0.0530059	0.0653344	0.0716699	0.0595126	0.0432458	0.0499238
cg00217795	0.516605	0.256603	0.773506	0.72728	0.488532	0.273872	0.550344	0.478171	0.812471	0.665291	0.858343	0.451781	0.44266	0.695134	0.241726	0.667239	0.502524	0.279982	0.576469	0.518553	0.334621	0.512797	0.685924	0.196296	0.545562	0.890932	0.515099	0.832573	0.843731	0.395548	0.83337	0.67822	0.659357	0.387401	0.467279	0.671047	0.721347	0.68805	0.713554	0.538478	0.529534	0.899788	0.336127	0.606135	0.354458	0.340643	0.86835	0.169995	0.557872
cg00221494	0.098926	0.0885523	0.0919168	0.0786459	0.113225	0.423969	0.0763095	0.069674	0.0975242	0.104253	0.0707955	0.0936925	0.0887392	0.0739731	0.080515	0.0780852	0.0982718	0.0758422	0.133505	0.0864028	0.0753749	0.100608	0.114066	0.0936925	0.0881785	0.76733	0.0935055	0.0717301	0.0743469	0.091543	0.0861225	0.13687	0.180327	0.068646	0.0886458	0.237336	0.0801412	0.186962	0.0758422	0.0852813	0.141823	0.131075	0.0859355	0.0777113	0.0845337	0.104347	0.537986	0.103132	0.0835057
cg00223186	0.0316641	0.027907	0.0327741	0.0245769	0.0355065	0.0331156	0.0268824	0.0299563	0.0297855	0.0456676	0.0225276	0.0228692	0.0196244	0.0256869	0.0209906	0.029017	0.0268824	0.035848	0.0251746	0.0277362	0.0178313	0.0440452	0.0292732	0.027907	0.0276509	0.0269678	0.0304686	0.0224422	0.02637	0.0218445	0.0209906	0.0233815	0.0204783	0.02526	0.0396051	0.0303832	0.0302979	0.0322618	0.0228692	0.0282486	0.0291024	0.0287609	0.0224422	0.0338841	0.029017	0.0335426	0.0287609	0.0161236	0.0303832
cg00223950	0.0528259	0.0444384	0.0360509	0.0565262	0.0765082	0.0432049	0.0375311	0.0390112	0.0434516	0.0306237	0.0385178	0.0498656	0.0271701	0.0372844	0.0577597	0.0449318	0.0493722	0.0338307	0.0358042	0.0478921	0.0473987	0.0291436	0.0397513	0.039998	0.0375311	0.0434516	0.0385178	0.0266767	0.0348175	0.0456718	0.0382711	0.0284035	0.0377777	0.0362976	0.0395046	0.040738	0.0466586	0.0498656	0.0358042	0.0412314	0.0414781	0.0486321	0.0461652	0.0478921	0.0498656	0.0358042	0.0441917	0.0348175	0.0441917
cg00224508	0.0350071	0.0377621	0.0492415	0.0421243	0.0536036	0.0386805	0.0377621	0.036155	0.0379917	0.0281195	0.0315633	0.0292674	0.0253645	0.0313337	0.0262828	0.0283491	0.0315633	0.0391397	0.0281195	0.0352367	0.0276603	0.0393693	0.0308745	0.0311041	0.029497	0.0501598	0.0366142	0.0324816	0.0278899	0.0230686	0.0226094	0.0232982	0.025594	0.0278899	0.0352367	0.0269716	0.0363846	0.0334	0.0308745	0.0338592	0.0368438	0.0402876	0.0441906	0.0347775	0.037303	0.036155	0.0453385	0.0212319	0.0317929
cg00226923	0.833103	0.83566	0.853955	0.855627	0.828874	0.787662	0.785695	0.906281	0.869889	0.639732	0.802317	0.813432	0.870479	0.746352	0.773498	0.781465	0.753138	0.886413	0.808219	0.774384	0.836939	0.796317	0.819235	0.800547	0.831333	0.76563	0.640814	0.896446	0.887987	0.856807	0.767203	0.758843	0.646617	0.873823	0.87461	0.797694	0.822874	0.742319	0.881298	0.840972	0.864578	0.816284	0.883561	0.7614	0.650059	0.803989	0.720287	0.903232	0.600782
cg00228799	0.0367472	0.0260195	0.0309364	0.0282544	0.0392057	0.0360767	0.0396527	0.0349593	0.0217731	0.0322773	0.0658016	0.0298189	0.0327243	0.0380882	0.0264665	0.0280309	0.0295954	0.0260195	0.0202086	0.0269134	0.0282544	0.0318303	0.0302659	0.0271369	0.024902	0.0380882	0.026243	0.0383117	0.0318303	0.0242315	0.0325008	0.025796	0.0459105	0.0295954	0.0300424	0.0293719	0.0282544	0.0213261	0.0313833	0.0280309	0.0506039	0.0374177	0.0264665	0.0293719	0.0331713	0.0287014	0.0275839	0.025796	0.0322773
cg00229387	0.181326	0.111206	0.134283	0.146414	0.27265	0.21969	0.13734	0.103119	0.156966	0.159629	0.123336	0.144244	0.130536	0.113178	0.110515	0.157164	0.247008	0.173633	0.136157	0.152134	0.081619	0.161897	0.177677	0.119786	0.186553	0.184383	0.209335	0.181819	0.112685	0.250756	0.104006	0.24188	0.265648	0.104598	0.244543	0.2261	0.143554	0.226988	0.139116	0.185665	0.124322	0.207757	0.177381	0.16387	0.183002	0.192865	0.121857	0.0968068	0.242077
cg00230271	0.0303803	0.0381085	0.0443265	0.0277154	0.0403292	0.036243	0.0374867	0.0533871	0.0459255	0.0519659	0.0265606	0.0311798	0.0265606	0.0304691	0.0259388	0.0411287	0.0292255	0.0338446	0.0288702	0.0368648	0.0256723	0.0469914	0.0332228	0.0357989	0.0430829	0.0472579	0.0481462	0.030025	0.0410398	0.0271824	0.0346441	0.0349994	0.0267383	0.0396186	0.0370425	0.0344665	0.0375755	0.030558	0.0330452	0.037309	0.0278931	0.0359766	0.0308244	0.0397074	0.0313574	0.0322457	0.0348218	0.0241622	0.0477021
cg00230368	0.0383329	0.0326554	0.0430084	0.0440103	0.0590389	0.0400027	0.0456802	0.0246401	0.0286478	0.0326554	0.0209665	0.0303176	0.0303176	0.0420065	0.0309855	0.036997	0.0436764	0.0396687	0.0433424	0.048018	0.0296497	0.0359951	0.036997	0.0403367	0.0410046	0.0406706	0.0460141	0.0246401	0.0520256	0.0249741	0.0319875	0.036329	0.036663	0.0413386	0.0413386	0.0346592	0.0503557	0.0460141	0.025642	0.0383329	0.0420065	0.0423405	0.0440103	0.0346592	0.0396687	0.0443443	0.0510237	0.025976	0.036663
cg00230502	0.0771444	0.0709897	0.263708	0.0736824	0.0857994	0.0823374	0.0802218	0.0842608	0.969382	0.105033	0.236012	0.0657967	0.066566	0.0821451	0.0717591	0.0846454	0.0804141	0.0888768	0.070028	0.0804141	0.0661814	0.136576	0.188698	0.0692587	0.0777214	0.229088	0.104071	0.316408	0.0844531	0.0773367	0.0704127	0.0815681	0.0692587	0.0775291	0.11388	0.114457	0.105033	0.0763751	0.060796	0.0750287	0.0850301	0.0790677	0.0831068	0.218702	0.0998398	0.0881075	0.0834914	0.692806	0.0829144
cg00230685	0.409542	0.0239335	0.475924	0.430733	0.54046	0.369488	0.0449637	0.0277061	0.170182	0.0388634	0.0242545	0.0218465	0.457703	0.026502	0.599376	0.0313984	0.437636	0.460111	0.0250974	0.0271442	0.0229221	0.0469704	0.0355724	0.470947	0.488687	0.0390239	0.23231	0.0221676	0.0330038	0.0257796	0.320284	0.117847	0.0268231	0.0269837	0.422642	0.494225	0.026502	0.0315589	0.534038	0.0287175	0.504178	0.448633	0.490452	0.0418333	0.0282599	0.0328432	0.572326	0.0158264	0.426158
cg00231140	0.0341556	0.032629	0.0359004	0.0369909	0.0385176	0.0319747	0.0330652	0.0315385	0.0338648	0.035755	0.0349553	0.0322655	0.0316112	0.0341556	0.0303026	0.0336467	0.033574	0.0414255	0.0331379	0.0327017	0.0311023	0.0407712	0.033574	0.0351007	0.0349553	0.0368455	0.0376452	0.031175	0.0377906	0.0310296	0.033356	0.0295029	0.0335014	0.0351007	0.0376452	0.0370636	0.0409166	0.0460782	0.0329925	0.0377906	0.0313931	0.433271	0.0307388	0.0336467	0.0349553	0.0365547	0.0373544	0.0277582	0.0354642
cg00231644	0.164993	0.139782	0.296208	0.120682	0.28322	0.141978	0.174352	0.289714	0.145225	0.395717	0.166235	0.142933	0.102729	0.0984312	0.0998636	0.259823	0.108936	0.116385	0.151433	0.12307	0.337941	0.195935	0.22955	0.181228	0.165089	0.572198	0.326481	0.149045	0.19307	0.130614	0.579551	0.261733	0.110368	0.235662	0.214557	0.236904	0.192688	0.166044	0.116194	0.141978	0.378718	0.124216	0.12498	0.24779	0.251706	0.162033	0.629401	0.100819	0.335935
cg00231920	0.0470553	0.0435272	0.0645193	0.0472317	0.0576396	0.0625789	0.0648721	0.0459969	0.0569339	0.0872754	0.049525	0.0491722	0.0523474	0.0620497	0.042998	0.0636373	0.0585216	0.0638137	0.042116	0.0606384	0.0417632	0.0650485	0.0497014	0.0551699	0.0539351	0.067871	0.0528767	0.0387643	0.0525239	0.0380587	0.0519946	0.0465261	0.0445857	0.0615205	0.085335	0.0606384	0.048643	0.0632845	0.0463497	0.0564047	0.0498778	0.0505834	0.0784552	0.0530531	0.0518182	0.0699878	0.0571104	0.0375295	0.0631081
cg00233307	0.40288	0.398988	0.612938	0.59458	0.306099	0.590604	0.378938	0.633073	0.454062	0.272428	0.602025	0.361595	0.426736	0.560656	0.288079	0.312021	0.553635	0.51565	0.518611	0.315997	0.462606	0.126411	0.45347	0.47555	0.577914	0.413708	0.415146	0.42606	0.584006	0.421999	0.719787	0.51988	0.152467	0.526309	0.34789	0.372001	0.512858	0.332324	0.641871	0.20991	0.457953	0.411593	0.410916	0.423353	0.437565	0.461168	0.506598	0.604986	0.458884
cg00234616	0.135713	0.367082	0.145077	0.0722954	0.348099	0.139288	0.142949	0.144387	0.66289	0.190533	0.606452	0.183042	0.137841	0.102259	0.133415	0.123966	0.144822	0.0749342	0.100982	0.148737	0.195641	0.145077	0.136905	0.100897	0.106175	0.602451	0.377859	0.645439	0.0716144	0.132053	0.245098	0.421647	0.153504	0.0803822	0.149929	0.414326	0.139544	0.181425	0.13035	0.0970666	0.214539	0.654377	0.107963	0.245864	0.17419	0.145928	0.627887	0.128818	0.169337
cg00236832	0.0499556	0.0808982	0.047991	0.0458627	0.0680464	0.0435707	0.0544579	0.0644446	0.416355	0.0438981	0.0651813	0.0476636	0.0393959	0.0420154	0.0461083	0.0536393	0.056095	0.0497919	0.0479092	0.0563406	0.0368583	0.0786061	0.054376	0.0511835	0.0493008	0.628696	0.0618251	0.0412786	0.047991	0.0402145	0.044553	0.0496282	0.0395596	0.0560132	0.0551127	0.0598605	0.0618251	0.050938	0.0528207	0.0565043	0.0478273	0.258368	0.0626437	0.0741858	0.0473362	0.0488915	0.563127	0.0296547	0.0506105
cg00237010	0.775801	0.738469	0.888319	0.612321	0.745762	0.468462	0.823118	0.821034	0.906811	0.621871	0.620048	0.683339	0.601902	0.883978	0.455525	0.656859	0.745501	0.837616	0.614231	0.536354	0.635936	0.820513	0.647135	0.533402	0.544775	0.928342	0.847514	0.877379	0.726922	0.888058	0.914364	0.788303	0.814002	0.82277	0.852028	0.863488	0.523939	0.807664	0.605896	0.799155	0.929471	0.854025	0.645138	0.562573	0.613883	0.666756	0.865138	0.868698	0.756267
cg00239071	0.90792	0.94961	0.90109	0.933476	0.887782	0.893317	0.877183	0.920992	0.917813	0.893788	0.955145	0.919697	0.965744	0.896615	0.962446	0.92323	0.895908	0.909922	0.931238	0.876124	0.962211	0.929118	0.862934	0.909687	0.889667	0.927705	0.861285	0.955734	0.934065	0.960091	0.963388	0.92641	0.960798	0.908274	0.926292	0.889902	0.87577	0.906272	0.950316	0.851746	0.910747	0.889431	0.924997	0.823835	0.872473	0.910394	0.91322	0.937598	0.866467
cg00239685	0.0374801	0.0511308	0.0419518	0.037127	0.0524253	0.040422	0.0460706	0.0553672	0.062781	0.0467767	0.0303016	0.033832	0.0306547	0.0208873	0.0258299	0.0385392	0.0370093	0.0403043	0.037127	0.0324199	0.0251238	0.0440701	0.0351265	0.0360679	0.0471297	0.0586622	0.056897	0.0399513	0.0344204	0.0405397	0.0388922	0.148804	0.0323022	0.0326552	0.0653699	0.0397159	0.0441877	0.0415988	0.0368917	0.0350088	0.0378331	0.0471297	0.0395983	0.0514838	0.040069	0.0398336	0.117972	0.0295956	0.0548965
cg00240432	0.257555	0.841586	0.661555	0.162515	0.480776	0.796579	0.510389	0.837203	0.688603	0.554863	0.669253	0.689351	0.0432069	0.382422	0.788561	0.431278	0.64862	0.285458	0.469979	0.677164	0.406155	0.773594	0.333672	0.814753	0.168502	0.824695	0.683685	0.646589	0.555718	0.336238	0.93203	0.477676	0.388409	0.0157318	0.391295	0.327044	0.534016	0.674812	0.422619	0.386378	0.755847	0.579665	0.575282	0.498202	0.703784	0.36799	0.759589	0.493605	0.128198
cg00241355	0.0515035	0.0616363	0.0440988	0.0483857	0.0507241	0.0573493	0.0487755	0.0261716	0.0351352	0.0460474	0.0335763	0.0421502	0.0417605	0.0554007	0.0347455	0.0503344	0.0460474	0.0499446	0.0386427	0.0624157	0.0363044	0.0530624	0.0456577	0.038253	0.0437091	0.0448783	0.0491652	0.0273408	0.0472166	0.0304586	0.0320175	0.0448783	0.0335763	0.0402016	0.0437091	0.0557905	0.0557905	0.052283	0.0308483	0.0476063	0.0448783	0.0511138	0.0554007	0.0569596	0.0592979	0.0651438	0.0624157	0.0300688	0.0495549
cg00243313	0.444796	0.69069	0.65392	0.473487	0.516886	0.671528	0.0800962	0.725804	0.603788	0.468204	0.519993	0.634965	0.429673	0.0482977	0.692762	0.586491	0.631858	0.44666	0.55956	0.391867	0.452357	0.725182	0.572197	0.118317	0.417865	0.698873	0.492131	0.647084	0.729429	0.320502	0.815192	0.560907	0.437649	0.507046	0.292535	0.43392	0.412065	0.571265	0.676707	0.45101	0.604513	0.591877	0.602131	0.570125	0.645737	0.324955	0.65506	0.69473	-0.0190283
cg00247489	0.0210952	0.0192581	0.0888827	0.0154003	0.583695	0.0186151	0.0237589	0.0185233	0.661862	0.0206359	0.660025	0.0181559	0.0148492	0.0159514	0.0178803	0.0255041	0.46594	0.0226567	0.0194418	0.0173292	0.0172374	0.44913	0.0199929	0.0190744	0.0199011	0.578184	0.0267901	0.5081	0.0242182	0.0154921	0.0145736	0.134534	0.0163188	0.0217382	0.0252286	0.0215544	0.0204522	0.0219219	0.0215544	0.0196255	0.0190744	0.451427	0.0143899	0.0254123	0.0157677	0.0194418	0.418084	0.0126447	0.0250449
cg00250430	0.101318	0.706865	0.629866	0.0971582	0.699193	0.842006	0.739218	0.877224	0.84672	0.176191	0.854393	0.644563	0.566363	0.098175	0.0921667	0.670076	0.790519	0.359676	0.726369	0.658336	0.719436	0.458582	0.0948473	0.12304	0.290811	0.621916	0.740234	0.828233	0.542884	0.801981	0.601765	0.708714	0.108158	0.363836	0.145502	0.661387	0.444809	0.102057	0.0861584	0.387592	0.222963	0.807158	0.200871	0.676361	0.680521	0.471708	0.835074	0.819359	0.166023
cg00253200	0.0299737	0.0277555	0.0331427	0.0282308	0.0299737	0.0294984	0.0283892	0.0255372	0.032192	0.0291815	0.0242696	0.0218929	0.0263294	0.0317166	0.0236358	0.0266463	0.0242696	0.0196746	0.0252203	0.0263294	0.026171	0.0258541	0.0280723	0.0328258	0.0279139	0.0320335	0.0291815	0.0228436	0.0255372	0.0241112	0.0236358	0.0280723	0.0253787	0.0309244	0.0299737	0.0288646	0.030766	0.0256956	0.0242696	0.0258541	0.0299737	0.0253787	0.0302906	0.0355194	0.0364701	0.0294984	0.030766	0.0223682	0.0323504
cg00256074	0.912808	0.887516	0.863712	0.838632	0.916953	0.934913	0.941183	0.91876	0.887516	0.864987	0.960842	0.539164	0.961161	0.945858	0.95893	0.929068	0.933212	0.914509	0.903776	0.913552	0.953191	0.803776	0.943733	0.885603	0.929812	0.927261	0.757761	0.950428	0.956698	0.740333	0.913446	0.929599	0.951916	0.955954	0.888154	0.862012	0.935975	0.918866	0.935231	0.909833	0.918335	0.871257	0.928005	0.851278	0.925455	0.854573	0.92301	0.828218	0.935444
cg00256166	0.0317397	0.0330093	0.044277	0.0287244	0.0498315	0.0311049	0.0418965	0.0401508	0.0365007	0.0322158	0.0247569	0.031581	0.0371355	0.0266613	0.023646	0.0357072	0.036342	0.0357072	0.0258678	0.0244395	0.0279309	0.0460227	0.0355485	0.0365007	0.04269	0.0406269	0.0542751	0.0276135	0.0338028	0.0233286	0.0296766	0.0255504	0.0245982	0.0382464	0.0444357	0.0380877	0.0525294	0.037929	0.0301527	0.0339615	0.0228525	0.0433248	0.0245982	0.0401508	0.023646	0.0323745	0.0428487	0.0179328	0.0414204
cg00256281	0.0439082	0.0439082	0.0430585	0.0311634	0.0464571	0.0396599	0.0383004	0.0364312	0.0403396	0.0350718	0.0289543	0.0377906	0.0308235	0.034392	0.0299738	0.0386403	0.0449277	0.0439082	0.0318431	0.034562	0.0337123	0.0483264	0.0355816	0.046627	0.036941	0.0311634	0.0313333	0.0269151	0.0350718	0.0284445	0.181892	0.0423788	0.0311634	0.0408494	0.046627	0.0386403	0.0354116	0.0405095	0.0347319	0.0479865	0.0350718	0.0500257	0.0311634	0.0372809	0.0287843	0.0352417	0.0428886	0.056653	0.0427186
cg00259755	0.0544295	0.0391665	0.0485663	0.0763934	0.0549879	0.0705301	0.0479148	0.0320003	0.233677	0.0702509	0.0317211	0.0283707	0.0213906	0.0294875	0.0181333	0.0384219	0.0670866	0.0640154	0.0231589	0.0527543	0.0195293	0.0321864	0.131303	0.0285568	0.0764864	0.0503345	0.039911	0.0407486	0.0418654	0.0333032	0.0317211	0.0764864	0.0279984	0.0334894	0.0310696	0.0525681	0.0541503	0.0619679	0.023345	0.0324656	0.174672	0.113993	0.0724845	0.0418654	0.0644808	0.0644808	0.556807	0.0157135	0.0412139
cg00261552	0.0377723	0.0337232	0.0280178	0.0324349	0.0283859	0.0337232	0.0291221	0.0258092	0.0221283	0.0243368	0.0274656	0.0213921	0.0309625	0.0293061	0.0302263	0.0324349	0.044582	0.0480789	0.0296742	0.0351956	0.028938	0.028754	0.032803	0.0285699	0.0298583	0.0331711	0.0296742	0.0259933	0.0418213	0.036668	0.0298583	0.0274656	0.0425575	0.0261773	0.024889	0.0396128	0.0423735	0.0304104	0.0245209	0.048447	0.0344594	0.028754	0.036668	0.0370361	0.0311466	0.0274656	0.0232326	0.0245209	0.0315147
cg00261781	0.0124392	0.0126701	0.0224445	0.0125162	0.0166722	0.0135167	0.0781659	0.0125162	0.0130549	0.0162104	0.0328345	0.0116696	0.0141324	0.0116696	0.0125932	0.0156717	0.0132858	0.0125932	0.0122083	0.0173649	0.0110539	0.0133628	0.0329115	0.0137476	0.0122853	0.0134398	0.0163644	0.0149021	0.0112848	0.0146712	0.0117466	0.019212	0.0292172	0.0122853	0.0112848	0.0121314	0.0159795	0.0140555	0.0122083	0.0123623	0.0147481	0.0130549	0.0319879	0.0573858	0.015133	0.0241377	0.0116696	0.0104382	0.0499974
cg00262415	0.0278071	0.0249958	0.0251715	0.0278071	0.030267	0.030267	0.0249958	0.0230631	0.0283342	0.0279828	0.0223602	0.024293	0.0255229	0.0232388	0.0235902	0.02728	0.02728	0.033254	0.0195489	0.0258743	0.0216574	0.0228874	0.024293	0.0271043	0.0279828	0.0306184	0.0276314	0.0237659	0.0221845	0.0271043	0.0286856	0.0264015	0.0290371	0.0383495	0.0265772	0.0283342	0.039228	0.024293	0.0228874	0.0234145	0.0292128	0.0235902	0.0295642	0.0274557	0.0253472	0.0235902	0.0262258	0.0204275	0.0228874
cg00263760	0.0745705	0.778375	0.611303	0.541784	0.610924	0.736796	0.556465	0.783963	0.71596	0.479843	0.707436	0.344121	0.722779	0.526346	0.540932	0.0924711	0.710182	0.329535	0.569535	0.0877355	0.0382011	0.780553	0.439022	0.0499454	0.0528815	0.674192	0.739922	0.607893	0.560632	0.0603637	0.881327	0.261153	0.238327	0.054681	0.0751388	0.446694	0.649851	0.651082	0.0412319	0.0563858	0.473592	0.672487	0.0728657	0.505036	0.723821	0.591792	0.752234	0.0471041	0.514413
cg00265415	0.037634	0.0220673	0.0273441	0.0334125	0.0252334	0.0270803	0.027608	0.0212757	0.024178	0.0289272	0.0244419	0.0278718	0.0249695	0.0260249	0.0202204	0.0228588	0.0347317	0.0273441	0.0289272	0.0347317	0.0202204	0.0257611	0.0202204	0.0268164	0.0347317	0.0270803	0.0249695	0.0220673	0.0207481	0.0212757	0.0244419	0.0236503	0.0228588	0.0257611	0.0236503	0.0286633	0.0315656	0.0310379	0.0210119	0.0336764	0.0431747	0.0313018	0.0281357	0.0254972	0.0270803	0.0247057	0.0281357	0.0181096	0.0260249
cg00265490	0.0498351	0.035983	0.0377608	0.0435387	0.0522796	0.037909	0.0395386	0.0565019	0.0469462	0.041909	0.0343533	0.03502	0.030057	0.0318348	0.0312422	0.0562797	0.0344274	0.0410942	0.0347237	0.0329459	0.0309459	0.0552426	0.0422794	0.0447239	0.0433165	0.0448721	0.0437609	0.0347237	0.0441313	0.0238346	0.0363534	0.0327237	0.0285014	0.0498351	0.0541315	0.0482055	0.0376867	0.0472425	0.0319088	0.0415387	0.0578353	0.0501314	0.0456869	0.0512425	0.0468721	0.0353904	0.0559834	0.0259087	0.0518352
cg00268009	0.0274185	0.020851	0.038677	0.0264802	0.0494664	0.0250729	0.0278876	0.0213201	0.0264802	0.0241347	0.0105306	0.0138144	0.0152217	0.0222583	0.0100615	0.029764	0.0124071	0.0236656	0.0175672	0.0246038	0.0161599	0.0227274	0.0269494	0.0236656	0.0344551	0.0269494	0.0142835	0.0199128	0.0217892	0.0128762	0.0217892	0.0156908	0.0138144	0.0180363	0.0236656	0.029764	0.0152217	0.0302331	0.00959244	0.025542	0.0250729	0.0138144	0.0246038	0.0335168	0.0274185	0.0222583	0.025542	0.00959244	0.0307022
cg00268338	0.031802	0.0295358	0.0308787	0.0301233	0.0313823	0.0336485	0.0307108	0.0284446	0.0296197	0.0302912	0.0278571	0.0286125	0.0295358	0.0287804	0.0293679	0.0294518	0.0337325	0.0301233	0.0298715	0.0322216	0.0276053	0.0345718	0.0302072	0.0319698	0.0286964	0.0335646	0.0287804	0.196984	0.0312144	0.0286125	0.0285286	0.0290322	0.0286964	0.0290322	0.0312984	0.0328931	0.0321377	0.0328092	0.0302072	0.0310466	0.0328092	0.649302	0.031802	0.0310466	0.0316341	0.0307948	0.321709	0.0277732	0.0303751
cg00269115	0.0228911	0.0197113	0.0221956	0.0205063	0.0198107	0.0224937	0.0267665	0.0203075	0.0200094	0.0286546	0.0147429	0.0203075	0.0165315	0.018817	0.0147429	0.0292508	0.0213012	0.0212019	0.0215993	0.0212019	0.0149416	0.0273628	0.0238848	0.026071	0.0237855	0.020705	0.0186183	0.0153391	0.0228911	0.0187176	0.0178233	0.0201088	0.0173265	0.0291514	0.0273628	0.0269653	0.0232886	0.0241829	0.0157366	0.0240836	0.0247792	0.022593	0.0201088	0.0240836	0.0215993	0.0228911	0.0264684	0.0127555	0.0213012
cg00273068	0.207534	0.663067	0.600604	0.146654	0.305623	0.555003	0.225109	0.528086	0.653409	0.539723	0.605037	0.496022	0.283852	0.205001	0.543761	0.0659022	0.441476	0.0527603	0.532756	0.326603	0.515023	0.367928	0.473222	0.0930568	0.367374	0.556586	0.351937	0.589203	0.674388	0.33729	0.631004	0.439892	0.185763	0.128445	0.428175	0.436884	0.329611	0.412975	0.520406	0.283456	0.509085	0.535923	0.429205	0.466493	0.452163	0.442505	0.555319	0.515023	0.306336
cg00273124	0.421303	0.252404	0.301985	0.212091	0.571395	0.268331	0.295146	0.256903	0.388729	0.424542	0.342117	0.372622	0.314942	0.27445	0.349316	0.385489	0.349136	0.241786	0.307204	0.3809	0.207772	0.369382	0.408165	0.233417	0.318452	0.291007	0.528023	0.592452	0.22055	0.352645	0.155221	0.455047	0.633214	0.183836	0.457926	0.459456	0.350756	0.553759	0.311433	0.241336	0.322501	0.755952	0.335459	0.420853	0.392868	0.370372	0.429131	0.223249	0.462155
cg00274399	0.0516939	0.0599828	0.0396375	0.0503376	0.0501869	0.0501869	0.0400896	0.0449122	0.0654082	0.0446108	0.040391	0.0431037	0.0387332	0.0293895	0.0361712	0.0428023	0.0485291	0.0394868	0.0438572	0.0504883	0.0268275	0.0340613	0.0458164	0.0565165	0.0434051	0.0577222	0.0471728	0.0387332	0.0308965	0.0313486	0.0406924	0.0420488	0.0348149	0.0349656	0.0304444	0.0456657	0.037829	0.0461178	0.0287866	0.0375276	0.0515432	0.0391854	0.0507897	0.0391854	0.0441586	0.0376783	0.0617912	0.027581	0.0491319
cg00275232	0.0267384	0.0274944	0.0205385	0.0167581	0.0314261	0.0232604	0.0229579	0.0536549	0.0315773	0.0225043	0.0108606	0.0176654	0.0123728	0.0110118	0.0117679	0.0563768	0.0184214	0.0243189	0.0184214	0.0225043	0.012524	0.0394406	0.0182702	0.0350553	0.0176654	0.021597	0.0528989	0.0135825	0.018119	0.0110118	0.0113143	0.0200848	0.0110118	0.0197824	0.0665084	0.0290066	0.0143386	0.0368699	0.0144898	0.0247725	0.0152459	0.0200848	0.0208409	0.0173629	0.0122216	0.0290066	0.0371723	0.00299734	0.0190263
cg00276797	0.0291825	0.0280993	0.0264746	0.024579	0.0282347	0.033109	0.0322966	0.031078	0.0336505	0.0387956	0.0222773	0.0226835	0.027287	0.0217357	0.0229543	0.0318904	0.024579	0.0301303	0.024579	0.0230897	0.0234959	0.0379832	0.0351399	0.0425867	0.02661	0.0301303	0.0217357	0.0188924	0.031755	0.0262038	0.0217357	0.024579	0.0232251	0.0283701	0.0367646	0.0268808	0.0274224	0.0377124	0.0255268	0.0308072	0.032432	0.0387956	0.0192986	0.0290471	0.0308072	0.0313488	0.0496272	0.0148306	0.0312134
cg00278366	0.374723	0.228848	0.466494	0.155739	0.429854	0.760384	0.539089	0.197345	0.27208	0.363851	0.681111	0.37361	0.472315	0.422577	0.210357	0.289886	0.584632	0.172005	0.455108	0.421978	0.26078	0.409993	0.386965	0.681111	0.600469	0.723829	0.27071	0.5075	0.509982	0.307007	0.0973553	0.516574	0.19743	0.25667	0.559806	0.590881	0.327125	0.708506	0.461186	0.189726	0.417612	0.426772	0.351951	0.48293	0.26018	0.467778	0.713899	0.137591	0.42506
cg00279797	0.183652	0.0413247	0.185007	0.25102	0.384943	0.191785	0.0486444	0.0439001	0.0767031	0.0468822	0.0489155	0.0372582	0.283958	0.040918	0.256713	0.0535242	0.070739	0.227705	0.0440357	0.0533886	0.051762	0.0476955	0.0547441	0.351869	0.127399	0.0779231	0.0990688	0.0543375	0.055964	0.0513554	0.153153	0.0457978	0.0554219	0.0426802	0.22391	0.337094	0.0434935	0.0630126	0.413544	0.0453912	0.245598	0.189616	0.0947312	0.0708745	0.0536597	0.0542019	0.24126	0.0382071	0.11791
cg00282347	0.0629203	0.0599551	0.0639724	0.0603377	0.54155	0.0618681	0.0749721	0.0552683	0.790047	0.0671288	0.740309	0.0559379	0.232315	0.0561292	0.0517293	0.0657898	0.0649289	0.053164	0.058903	0.0655028	0.0490511	0.0706679	0.0630159	0.0721026	0.0649289	0.829454	0.0696157	0.416632	0.822472	0.478134	0.0593812	0.0714331	0.0551727	0.0611986	0.0591899	0.456709	0.0601464	0.319739	0.0564161	0.05699	0.184778	0.72797	0.0659811	0.0929542	0.0809024	0.0618681	0.81195	0.049912	0.0765981
cg00282683	0.0367839	0.032184	0.029675	0.0330204	0.0489109	0.0317659	0.0280023	0.0196389	0.0300932	0.0388748	0.0204752	0.0334385	0.0367839	0.0263296	0.0254933	0.0330204	0.0300932	0.0765102	0.0300932	0.0392929	0.0171299	0.0330204	0.0618742	0.0455655	0.0334385	0.0305113	0.0300932	0.0238206	0.0284205	0.0162935	0.017548	0.0284205	0.0234024	0.032184	0.0827828	0.0560198	0.0397111	0.0292568	0.0284205	0.0476564	0.0330204	0.029675	0.0363657	0.029675	0.0430565	0.0560198	0.0388748	0.0129481	0.0280023
cg00283535	0.350728	0.168586	0.165179	0.239215	0.649494	0.157316	0.217987	0.29923	0.357804	0.203311	0.273154	0.275382	0.130716	0.128488	0.178545	0.388991	0.152861	0.157579	0.202787	0.142247	0.128095	0.269616	0.311941	0.162427	0.206849	0.270402	0.256774	0.237643	0.181689	0.114467	0.142116	0.204228	0.750394	0.199642	0.151813	0.417164	0.238167	0.275119	0.263981	0.199904	0.293465	0.300934	0.228732	0.453331	0.277347	0.113026	0.289009	0.0976942	0.356625
cg00288562	0.0159891	0.0149509	0.0309959	0.0186318	0.0255217	0.0177823	0.0154228	0.0169329	0.0222183	0.0178767	0.0115531	0.0138183	0.0102317	0.010798	0.00758903	0.0176879	0.0244835	0.0198587	0.014007	0.026088	0.00664521	0.0220295	0.0217464	0.0180655	0.0224071	0.0176879	0.0263711	0.00711712	0.0203306	0.00664521	0.0093823	0.0107037	0.00928792	0.0220295	0.0144789	0.0205194	0.0227846	0.0190093	0.013252	0.0208969	0.0225014	0.0308071	0.0209913	0.0270318	0.0231621	0.0141958	0.0309015	0.00579577	0.0254273
cg00290028	0.0246884	0.0254268	0.0229903	0.023138	0.0255006	0.0239501	0.0243931	0.022695	0.0226211	0.0229903	0.0214398	0.0225473	0.0248361	0.022252	0.0218828	0.0227688	0.0235071	0.0228426	0.0229165	0.0321455	0.023138	0.0229165	0.0221043	0.0224735	0.0243193	0.0224735	0.0254268	0.0257221	0.0234333	0.0223258	0.0221043	0.022695	0.0226211	0.0217352	0.0227688	0.0252791	0.021809	0.0225473	0.0232118	0.0226211	0.0225473	0.0258698	0.024024	0.0229903	0.0248361	0.0232118	0.0523017	0.0209968	0.0247623
cg00290506	0.029231	0.668973	0.307933	0.312206	0.536254	0.666214	0.0335927	0.670754	0.627404	0.0962584	0.61877	0.639866	0.521121	0.15474	0.0214868	0.190079	0.615565	0.0222879	0.0182823	0.588772	0.0190834	0.642714	0.0534427	0.126256	0.642091	0.707605	0.638887	0.63497	0.704312	0.516226	0.804007	0.522368	0.412524	0.0173921	0.0272727	0.417331	0.384485	0.0247803	0.484626	0.362232	0.467179	0.564471	0.0223769	0.0952792	0.0443633	0.0310113	0.67921	0.581562	0.477594
cg00291877	0.0437708	0.0725681	0.049574	0.0673123	0.0572387	0.0494645	0.0443183	0.0580052	0.0401574	0.0690642	0.0239521	0.0266895	0.0226381	0.0396099	0.0282224	0.0838461	0.0443183	0.0536254	0.0328212	0.0426758	0.025923	0.0777144	0.050012	0.0531874	0.0463987	0.0542824	0.0363251	0.0296459	0.0552678	0.025923	0.0341352	0.0315073	0.026361	0.0578957	0.0539539	0.039172	0.0535159	0.0451942	0.0288794	0.0509975	0.0692832	0.0499025	0.0433328	0.0564723	0.0431138	0.0439898	0.0473841	0.0153019	0.051326
cg00292662	0.071389	0.0453235	0.0584994	0.0633688	0.0567808	0.0619366	0.056208	0.0530572	0.0487607	0.0550622	0.0413134	0.0499064	0.0441777	0.0542029	0.0461828	0.0590723	0.0696704	0.0536301	0.0524843	0.0542029	0.0453235	0.056208	0.0441777	0.0625095	0.0499064	0.0467556	0.0564944	0.0473285	0.0521979	0.0453235	0.0490471	0.04962	0.0481878	0.0504793	0.0481878	0.0539165	0.0625095	0.0630824	0.0456099	0.0596452	0.0788362	0.0616502	0.0627959	0.0490471	0.056208	0.0510521	0.0625095	0.0381626	0.0456099
cg00292971	0.887446	0.851484	0.903681	0.845255	0.785318	0.901038	0.882349	0.919726	0.903586	0.771538	0.896696	0.880178	0.8983	0.834872	0.928127	0.796645	0.875836	0.840346	0.849596	0.843367	0.941436	0.709242	0.848936	0.911043	0.901321	0.937188	0.84988	0.937849	0.901698	0.93464	0.939642	0.917367	0.771632	0.91076	0.856392	0.822035	0.878479	0.903114	0.932186	0.664879	0.918594	0.909721	0.907267	0.712262	0.887163	0.812785	0.917556	0.95314	0.885275
cg00293409	0.0336103	0.045511	0.0314465	0.0345938	0.459282	0.0347905	0.0312498	0.459282	0.738802	0.0306597	0.417974	0.0297745	0.0353806	0.0326267	0.0305613	0.0286926	0.0292827	0.0333152	0.0298729	0.0328234	0.0281025	0.0310531	0.0256437	0.0342987	0.0300696	0.60809	0.589108	0.690314	0.0377411	0.0308564	0.415023	0.111703	0.025742	0.0280041	0.0331185	0.0359707	0.0331185	0.45643	0.0275124	0.030463	0.0750169	0.41522	0.0333152	0.032135	0.0348889	0.0306597	0.609369	0.0266272	0.0289877
cg00294382	0.268589	0.133775	0.320334	0.272438	0.130674	0.19001	0.122014	0.628024	0.402549	0.365344	0.454615	0.242503	0.172797	0.174615	0.114744	0.275539	0.150346	0.296493	0.165955	0.216096	0.299701	0.139655	0.176646	0.147245	0.487436	0.717723	0.150773	0.112392	0.127146	0.618937	0.20038	0.540464	0.121266	0.204443	0.174401	0.268376	0.150025	0.207009	0.517158	0.373897	0.667688	0.138799	0.430773	0.139869	0.161999	0.358929	0.407681	0.35925	0.343106
cg00295206	0.0382817	0.0527345	0.0400335	0.0450701	0.0437562	0.0404715	0.0308363	0.0509826	0.0391576	0.0354349	0.0317122	0.0354349	0.0317122	0.0374058	0.0297414	0.0268947	0.0376247	0.0428803	0.0367488	0.0507636	0.0290845	0.0371868	0.0391576	0.0406905	0.0356539	0.0494497	0.0759465	0.0382817	0.0332451	0.0251428	0.0297414	0.0411284	0.0303984	0.0297414	0.0406905	0.0356539	0.0367488	0.0321502	0.0321502	0.0433183	0.0376247	0.0336831	0.034997	0.03434	0.0352159	0.0367488	0.034997	0.0275516	0.0417854
cg00295325	0.816795	0.764804	0.777738	0.714325	0.795041	0.849468	0.641839	0.826706	0.868534	0.796973	0.842412	0.763796	0.826118	0.771019	0.746241	0.808228	0.804532	0.834013	0.705001	0.561291	0.772951	0.435303	0.795545	0.771019	0.453026	0.825866	0.59304	0.836365	0.863158	0.492082	0.366346	0.775891	0.775219	0.773287	0.851399	0.795377	0.311835	0.817551	0.796889	0.552724	0.799156	0.670817	0.785046	0.407586	0.699122	0.757328	0.843084	0.845268	0.776059
cg00297584	0.0443966	0.0491269	0.0462082	0.0462082	0.0391631	0.0431889	0.0389618	0.0496301	0.0407734	0.054159	0.0320174	0.0452017	0.0396663	0.0388612	0.0406728	0.0436921	0.0353387	0.0370496	0.0550648	0.0433902	0.0307091	0.0509384	0.0387606	0.0419812	0.0404715	0.525172	0.395643	0.349649	0.0340303	0.0336277	0.0390625	0.0473153	0.140008	0.0422831	0.0554674	0.0456043	0.048523	0.0589899	0.0336277	0.0357412	0.0516429	0.0474159	0.0361438	0.0455037	0.0493281	0.0518442	0.0609022	0.256654	0.042585
cg00298357	0.728621	0.510843	0.781435	0.78216	0.667213	0.638217	0.761449	0.643395	0.829174	0.701283	0.826689	0.672598	0.642463	0.757203	0.837666	0.638113	0.686785	0.803285	0.563035	0.637699	0.833938	0.582193	0.745915	0.539632	0.787855	0.677154	0.739391	0.862726	0.822547	0.859412	0.626204	0.602697	0.777914	0.769008	0.829588	0.801525	0.637181	0.683989	0.782263	0.760206	0.839737	0.798314	0.730692	0.680468	0.755235	0.804114	0.831245	0.828967	0.689374
cg00302793	0.0646927	0.0593582	0.0635496	0.0761239	0.0711704	0.0700273	0.0646927	0.0563099	0.0650738	0.0707893	0.0540237	0.0551668	0.0639306	0.066979	0.0585961	0.0753618	0.0524995	0.0601203	0.0555478	0.0654548	0.0498322	0.0589772	0.0551668	0.0921275	0.0513564	0.0719324	0.0928895	0.0490702	0.0547857	0.0498322	0.0608823	0.047546	0.057834	0.0624065	0.104702	0.0631686	0.067741	0.0601203	0.0982241	0.0631686	0.0944137	0.0643117	0.097462	0.0879361	0.0864119	0.0719324	0.06736	0.0425925	0.0658358
cg00303548	0.0129243	0.0772318	0.0103454	0.000861491	0.506253	0.00111107	0.0070177	0.0334312	0.620309	0.0952012	0.667895	0.00310768	0.00477152	0.00260852	0.000362339	0.00460513	0.00344044	0.00277491	0.00294129	0.00344044	-0.000968733	0.0581808	0.00377321	0.00660174	0.00468832	0.679708	0.525387	0.664567	0.00319087	0.479548	0.00302448	0.00843196	0.00202618	0.00169341	0.022741	0.0346374	0.00161022	0.0991113	0.00269172	0.00468832	0.128894	0.440032	0.00310768	0.00743366	0.00277491	0.00435556	0.610243	-0.00263257	0.00743366
cg00307685	0.893672	0.896929	0.914299	0.935108	0.799941	0.821926	0.915838	0.881729	0.903081	0.821203	0.903533	0.917285	0.907152	0.909595	0.881367	0.910228	0.85124	0.939451	0.892676	0.908238	0.929589	0.896024	0.898195	0.901995	0.907695	0.555031	0.773071	0.868068	0.919999	0.892134	0.918642	0.918823	0.893219	0.944698	0.737786	0.896205	0.906971	0.917195	0.913485	0.918733	0.886072	0.921628	0.902628	0.890867	0.907062	0.686941	0.925699	0.92208	0.91448
cg00308133	0.0057918	0.00501555	0.0066543	0.00225554	0.488361	0.00536055	0.0064818	0.0496931	0.629553	0.00898305	0.557275	0.0161418	0.00182429	0.00208304	0.000358038	0.0064818	0.00863805	0.0056193	0.00234179	0.00467055	0.000789289	0.0691857	0.0051018	0.0052743	0.00346304	0.538645	0.41134	0.6073	0.0981657	0.12775	0.0616819	0.0663394	0.00691305	0.00449805	0.0073443	0.472836	0.00587805	0.0714282	0.00398054	0.00975931	0.121453	0.611182	0.00182429	0.0047568	0.0066543	0.00691305	0.639213	0.00191054	0.0064818
cg00308665	0.146207	0.13037	0.137736	0.11085	0.519171	0.11527	0.166954	0.294509	0.546057	0.217534	0.160816	0.150135	0.264676	0.112446	0.132089	0.356383	0.159466	0.132334	0.147557	0.153327	0.196909	0.16278	0.22269	0.137981	0.171374	0.239141	0.27904	0.200224	0.115638	0.144488	0.112446	0.210045	0.364363	0.119935	0.218885	0.341651	0.12239	0.155414	0.169041	0.111464	0.142401	0.149399	0.169778	0.181318	0.14412	0.133807	0.268237	0.105939	0.308627
cg00309056	0.0598737	0.0628466	0.0635899	0.0524412	0.0788264	0.0494683	0.0777115	0.0468669	0.0595021	0.0628466	0.0628466	0.0505831	0.0416642	0.0476102	0.0398061	0.0468669	0.0539277	0.0576439	0.0513264	0.0550426	0.0468669	0.054671	0.0457521	0.0535561	0.0498399	0.0702791	0.062475	0.0502115	0.0524412	0.0476102	0.0412926	0.048725	0.0453804	0.0472385	0.0446372	0.0494683	0.0453804	0.0565291	0.0528129	0.062475	0.0710223	0.0542994	0.0713939	0.054671	0.051698	0.0557858	0.0542994	0.030144	0.0569007
cg00309204	0.0271088	0.0389697	0.0312271	0.0313919	0.0290856	0.0295798	0.0299916	0.0389697	0.0323803	0.0522308	0.0267793	0.022908	0.0240612	0.0349337	0.0220844	0.035675	0.0272735	0.0344395	0.0248025	0.0248025	0.0250496	0.0505835	0.0246377	0.0318037	0.0246377	0.0248848	0.0302387	0.0222491	0.03411	0.0234846	0.0275206	0.0256262	0.020437	0.0248848	0.0441588	0.0250496	0.0268617	0.0296621	0.0294974	0.0295798	0.0261204	0.0289208	0.0302387	0.0256262	0.0303211	0.0327097	0.0380636	0.0185426	0.0287561
cg00311768	0.372522	0.150728	0.252347	0.12615	0.467146	0.22874	0.21543	0.173947	0.310152	0.247393	0.231752	0.296745	0.206978	0.190074	0.201149	0.335216	0.222231	0.14558	0.301214	0.252445	0.119058	0.166953	0.289944	0.146162	0.321227	0.266046	0.287321	0.304225	0.135282	0.181234	0.159666	0.268571	0.517567	0.116823	0.49668	0.415171	0.2233	0.260411	0.197166	0.178222	0.172393	0.279355	0.242827	0.347943	0.28975	0.301311	0.257108	0.165204	0.309666
cg00312919	0.0373012	0.0416903	0.0409025	0.0374138	0.0423655	0.0356131	0.039327	0.0370762	0.0367385	0.0386517	0.036626	0.036626	0.0355006	0.0382016	0.0349379	0.0368511	0.0375263	0.0337	0.0353881	0.039327	0.0347128	0.0379765	0.0358382	0.0373012	0.0360633	0.0375263	0.039552	0.0365135	0.0365135	0.0342627	0.0340376	0.0352755	0.0362884	0.0364009	0.0360633	0.0368511	0.0364009	0.0358382	0.0374138	0.0369636	0.0367385	0.036626	0.0370762	0.0383141	0.0391019	0.0362884	0.0382016	0.0327997	0.0379765
cg00314943	0.888778	0.924787	0.874895	0.865848	0.903916	0.882508	0.877134	0.921562	0.915561	0.902752	0.93043	0.881433	0.910455	0.879552	0.919771	0.88842	0.878567	0.864594	0.941985	0.844619	0.902214	0.885733	0.844619	0.890032	0.871939	0.928459	0.899348	0.934192	0.878836	0.904902	0.917352	0.895317	0.903827	0.921473	0.89684	0.837095	0.896303	0.886987	0.929624	0.854203	0.865579	0.863877	0.879015	0.85707	0.873282	0.885106	0.913501	0.924339	0.87167
cg00315936	0.0487532	0.0361283	0.0594143	0.0575439	0.0737226	0.0549254	0.0511847	0.0641837	0.0713846	0.0624069	0.0423005	0.0473504	0.0383727	0.037531	0.0311718	0.0438903	0.0522134	0.0589467	0.0444514	0.0589467	0.0417394	0.0487532	0.0491273	0.0513717	0.0514652	0.06568	0.125625	0.0492208	0.0490338	0.0337903	0.047631	0.0374375	0.0403366	0.0523069	0.0521199	0.0496884	0.0512782	0.0500625	0.0436097	0.0496884	0.07073	0.052868	0.0632485	0.0566087	0.0496884	0.0495014	0.0589467	0.0265894	0.0574504
cg00317680	0.142116	0.0215882	0.0999561	0.108775	0.102609	0.121036	0.1115	0.0567928	0.0914238	0.0544267	0.0360716	0.0614533	0.0210146	0.0482606	0.0452492	0.0633175	0.136953	0.10942	0.0585136	0.0853294	0.0257468	0.0549286	0.0717781	0.100315	0.124406	0.135878	0.0890577	0.0347093	0.130644	0.017573	0.0377207	0.0463247	0.0181466	0.154735	0.0504833	0.127561	0.100315	0.078016	0.0272525	0.108775	0.142187	0.145127	0.120104	0.141901	0.12333	0.0590155	0.121753	0.0245279	0.102035
cg00318573	0.49106	0.714547	0.432927	0.417719	0.566037	0.731005	0.25535	0.71012	0.642843	0.60213	0.64034	0.682593	0.126763	0.420222	0.585671	0.516566	0.643805	0.231577	0.472003	0.544093	0.365264	0.699629	0.507903	0.571138	0.475179	0.67778	0.262183	0.644671	0.721284	0.608097	0.764211	0.48875	0.288363	0.0284941	0.179699	0.537066	0.402031	0.617914	0.533505	0.515507	0.495102	0.623786	0.566614	0.478355	0.49799	0.184511	0.660648	0.736203	0.480569
cg00318865	0.0397852	0.0384545	0.0312685	0.0323331	0.0397852	0.03393	0.0349946	0.0288731	0.0373899	0.0453744	0.0264778	0.03393	0.0318008	0.0384545	0.0280747	0.0336638	0.041116	0.035793	0.0349946	0.0371238	0.0270101	0.0320669	0.0349946	0.0352607	0.03047	0.0413821	0.0387206	0.0278085	0.0323331	0.0288731	0.0427129	0.0310023	0.0336638	0.0283408	0.035793	0.0365915	0.0328654	0.0360592	0.0312685	0.035793	0.0461728	0.0344623	0.0392529	0.0389868	0.0392529	0.0307362	0.0296716	0.0248809	0.0280747
cg00319761	0.0152823	0.011484	0.0130666	0.0140162	0.0136997	0.0133831	0.0119588	0.00910996	0.0119588	0.0103761	0.0089517	0.00974303	0.0119588	0.00958476	0.0084769	0.0129084	0.0136997	0.0113257	0.0108509	0.0140162	0.0089517	0.0133831	0.0105344	0.0159154	0.0135414	0.0167067	0.0203469	0.0102178	0.0102178	0.00816037	0.00974303	0.0108509	0.0103761	0.0122753	0.0103761	0.0148075	0.016865	0.0130666	0.0100596	0.0149658	0.0148075	0.0124336	0.0132249	0.0124336	0.0118005	0.011484	0.0149658	0.00673597	0.0113257
cg00320243	0.0437757	0.0581381	0.0362823	0.0397168	0.0412779	0.0394046	0.0634459	0.0409657	0.0415901	0.0481469	0.0381556	0.0412779	0.0390923	0.0387801	0.0365945	0.0419024	0.0406535	0.0409657	0.0340967	0.0456491	0.0387801	0.0397168	0.0440879	0.0478346	0.0394046	0.0528303	0.0434635	0.0334723	0.0409657	0.0369067	0.0350334	0.0397168	0.0403412	0.0397168	0.0406535	0.0425268	0.0425268	0.0437757	0.0403412	0.0456491	0.0412779	0.0422146	0.0425268	0.0344089	0.0653193	0.0365945	0.0415901	0.0278522	0.0347212
cg00321065	0.0309897	0.028966	0.0263904	0.0294259	0.0308057	0.0323695	0.0285061	0.0390844	0.0323695	0.0377966	0.0236309	0.0269423	0.0197675	0.0279542	0.0194915	0.029242	0.0313576	0.0303458	0.0241828	0.0244587	0.0203194	0.0494788	0.0274943	0.0331974	0.0309897	0.0332893	0.035589	0.0214232	0.0251946	0.0205953	0.0253786	0.0272183	0.0215152	0.0359569	0.0445116	0.0296099	0.0314496	0.0285981	0.0240908	0.0297019	0.0309897	0.0274023	0.0351291	0.0324615	0.0256545	0.0322775	0.0326454	0.0193995	0.0339332
cg00321478	0.533039	0.249258	0.326841	0.376672	0.819484	0.295825	0.368768	0.647652	0.919405	0.405024	0.904197	0.350639	0.63863	0.451333	0.495494	0.421177	0.288608	0.62918	0.303214	0.61698	0.316617	0.36808	0.465252	0.314125	0.292474	0.896293	0.482091	0.529259	0.35253	0.605896	0.220133	0.656673	0.716642	0.556237	0.779275	0.817508	0.350983	0.520496	0.324779	0.202606	0.583644	0.895176	0.318679	0.543006	0.39712	0.387927	0.855655	0.19221	0.512763
cg00323915	0.692324	0.768991	0.754479	0.386111	0.529862	0.631537	0.486874	0.501568	0.722443	0.654081	0.832424	0.319484	0.626518	0.66047	0.493536	0.788888	0.289547	0.182578	0.657367	0.232138	0.912924	0.786971	0.757582	0.15182	0.799658	0.796828	0.368313	0.578966	0.902246	0.708844	0.881527	0.592565	0.714229	0.883627	0.785876	0.608172	0.368405	0.530227	0.815813	0.81134	0.654903	0.800388	0.64249	0.583986	0.655724	0.46077	0.797832	0.881892	0.480302
cg00324733	0.0403572	0.0381328	0.0393461	0.0435927	0.0417727	0.0483449	0.039245	0.0375261	0.0387394	0.0395483	0.0394472	0.0382339	0.0382339	0.0391439	0.0371217	0.0439971	0.039245	0.0531982	0.0350995	0.0423794	0.0350995	0.0368183	0.0400538	0.0408627	0.0395483	0.0423794	0.0434916	0.0334817	0.036515	0.034695	0.037425	0.0363128	0.0508726	0.150062	0.0393461	0.0403572	0.0391439	0.0394472	0.0348972	0.0422783	0.0397505	0.038335	0.044806	0.0368183	0.0467271	0.0367172	0.0414694	0.0327739	0.0406605
cg00327185	0.0435112	0.0540655	0.0392393	0.0367264	0.028685	0.0403073	0.0479088	0.0714046	0.054568	0.038988	0.0276799	0.0381085	0.0268632	0.0303812	0.018759	0.0320775	0.0445164	0.0421291	0.0442651	0.0384226	0.0186962	0.0362238	0.0333967	0.0535629	0.0382969	0.0823986	0.0685147	0.0338993	0.0370405	0.0235964	0.0296274	0.0342134	0.0214604	0.0378572	0.043574	0.0431971	0.0460241	0.0485371	0.0671326	0.0399303	0.027617	0.0495422	0.0398675	0.0415009	0.0333967	0.03258	0.0381085	0.0200155	0.0464011
cg00327483	0.851016	0.880399	0.868908	0.886799	0.87298	0.868326	0.881126	0.87429	0.861635	0.87269	0.875017	0.865708	0.89189	0.863089	0.897563	0.848689	0.873708	0.866289	0.872544	0.868908	0.895817	0.765487	0.874581	0.858871	0.875453	0.876326	0.605048	0.882726	0.886653	0.869199	0.897563	0.880981	0.819743	0.879672	0.878799	0.830507	0.822507	0.851016	0.888981	0.856398	0.884908	0.88069	0.884035	0.845344	0.84898	0.878217	0.86949	0.88389	0.870071
cg00328227	0.401124	0.18142	0.557297	0.893078	0.397462	0.43829	0.309672	0.20696	0.681064	0.334206	0.48928	0.36652	0.294567	0.563797	0.174828	0.316812	0.290631	0.212819	0.358922	0.379336	0.179131	0.189475	0.254013	0.514546	0.458155	0.523517	0.69983	0.327431	0.304362	0.211903	0.141781	0.401032	0.314249	0.44836	0.490104	0.593274	0.28999	0.454585	0.188102	0.313791	0.491019	0.686282	0.292462	0.430326	0.227283	0.534594	0.704224	0.371189	0.569381
cg00331237	0.0422703	0.0491245	0.0430819	0.0370394	0.0534535	0.0451563	0.0422703	0.0427212	0.0511086	0.0568806	0.0336123	0.0388431	0.0405567	0.0396548	0.0351455	0.0361375	0.0453366	0.0340632	0.0384824	0.0507479	0.0330711	0.064276	0.0378511	0.0627428	0.0400156	0.0393843	0.0405567	0.0394744	0.0333417	0.0506577	0.0479521	0.0506577	0.0422703	0.0375805	0.0476815	0.0796079	0.0378511	0.0517399	0.0385726	0.0381216	0.120553	0.0421801	0.0460581	0.0677933	0.0603979	0.0442544	0.0506577	0.0335221	0.0612096
cg00331433	0.0573621	0.0557236	0.0633201	0.0674906	0.063618	0.0616816	0.0654054	0.0618306	0.060639	0.0582558	0.0639159	0.0591495	0.0579579	0.0573621	0.0554257	0.0622774	0.0609369	0.0585537	0.0601921	0.0624264	0.0630222	0.0612348	0.0607879	0.0615327	0.0630222	0.0740444	0.151647	0.0674906	0.0643627	0.06049	0.0540852	0.0648096	0.0607879	0.0570642	0.0616816	0.0630222	0.0578089	0.066448	0.0612348	0.0600432	0.0598942	0.0584047	0.0679375	0.0683843	0.0637669	0.0610858	0.0601921	0.0569152	0.0651075
cg00332153	0.635071	0.121094	0.0823412	0.56904	0.120414	0.078092	0.0877801	0.0703586	0.725323	0.24075	0.555697	0.0816613	0.0762224	0.0967883	0.630567	0.181941	0.756427	0.0817463	0.0876102	0.579492	0.0696787	0.603203	0.127807	0.0887149	0.0851456	0.0893098	0.0904996	0.0729081	0.505727	0.0742678	0.0743528	0.377912	0.0742678	0.078092	0.538361	0.134266	0.69405	0.0804716	0.0704436	0.0822562	0.098488	0.591135	0.121263	0.559776	0.093559	0.108261	0.785322	0.59326	0.527738
cg00332745	0.0409893	0.0333133	0.0252629	0.0355599	0.0308795	0.0400532	0.0312539	0.0243268	0.0260118	0.0280712	0.0230163	0.0295689	0.0295689	0.0269479	0.0293817	0.027884	0.0320028	0.0344366	0.0331261	0.030505	0.0288201	0.0233907	0.030505	0.030505	0.024514	0.033875	0.033875	0.0252629	0.0333133	0.0258246	0.0222674	0.0267607	0.0248885	0.0273223	0.0290073	0.03219	0.0312539	0.0299434	0.0237652	0.0320028	0.0312539	0.0346239	0.0276967	0.0273223	0.038181	0.0265734	0.0291945	0.0188975	0.0284456
cg00333226	0.479675	0.662126	0.447605	0.458706	0.462201	0.732331	0.475461	0.692757	0.58894	0.559028	0.597883	0.574858	0.620908	0.574138	0.714652	0.60405	0.595519	0.662023	0.630364	0.570541	0.781362	0.3848	0.603228	0.438251	0.696458	0.727295	0.676208	0.642802	0.707765	0.653183	0.815488	0.578867	0.471657	0.777764	0.0508376	0.441951	0.670349	0.582773	0.479675	0.718455	0.641465	0.571466	0.542274	0.523772	0.627075	0.548235	0.637765	0.771494	0.471966
cg00333528	0.502443	0.548639	0.249728	0.853916	0.24218	0.217082	0.313475	0.454064	0.548821	0.340847	0.31975	0.197712	0.244727	0.579922	0.180616	0.216263	0.359671	0.465977	0.276646	0.237724	0.309474	0.169703	0.548912	0.127508	0.533998	0.361399	0.154608	0.549639	0.344212	0.310201	0.235087	0.41196	0.360944	0.742518	0.594562	0.418144	0.364582	0.178615	0.562643	0.152243	0.438059	0.292651	0.150243	0.39932	0.222902	0.344939	0.526996	0.337301	0.609931
cg00334507	0.604484	0.46857	0.715147	0.578946	0.705582	0.698504	0.752258	0.80142	0.883963	0.523184	0.775117	0.703382	0.834227	0.740206	0.786499	0.804672	0.704721	0.765552	0.554556	0.568138	0.414243	0.60544	0.58325	0.788125	0.782482	0.817871	0.684062	0.671436	0.61644	0.740493	0.727294	0.776647	0.526436	0.881954	0.415582	0.658524	0.779517	0.734563	0.770335	0.689035	0.824853	0.845704	0.528732	0.681766	0.734085	0.616057	0.701374	0.835566	0.829731
cg00335286	0.542422	0.556292	0.318155	0.408799	0.656412	0.394636	0.418567	0.532459	0.477076	0.672333	0.311024	0.271074	0.518979	0.321671	0.420325	0.406943	0.288168	0.382622	0.611089	0.250659	0.207584	0.369142	0.321476	0.264627	0.184922	0.586963	0.267655	0.61822	0.613922	0.501398	0.235226	0.780462	0.498076	0.754968	0.685129	0.486257	0.258083	0.457052	0.324894	0.67497	0.620173	0.827836	0.320401	0.249683	0.258962	0.375296	0.675556	0.576023	0.439275
cg00336605	0.0363208	0.0329033	0.0439153	0.036574	0.0501175	0.0349285	0.0393586	0.0482188	0.0492314	0.0470797	0.0316375	0.0292326	0.026448	0.0373334	0.0253088	0.0453076	0.0337893	0.0426496	0.031511	0.0330299	0.0268277	0.053535	0.0382194	0.0402446	0.0437887	0.0472063	0.0399915	0.0294858	0.0469531	0.0256885	0.031511	0.0308781	0.0251822	0.043409	0.0559399	0.044295	0.0403712	0.0411307	0.0302452	0.0349285	0.0363208	0.0403712	0.0367005	0.0468265	0.0304984	0.0418901	0.0497377	0.0161954	0.053535
cg00338702	0.553563	0.553743	0.166763	0.66921	0.689902	0.728959	0.0443086	0.0833649	0.711939	0.640276	0.699666	0.620837	0.0598953	0.696352	0.493367	0.19928	0.736394	0.741679	0.719463	0.178677	0.647711	0.722778	0.717851	0.342337	0.0623139	0.760938	0.771061	0.697964	0.640097	0.0466376	0.808863	0.580437	0.05676	0.234574	0.0847981	0.594591	0.3693	0.737916	0.600503	0.0392922	0.326123	0.754757	0.693575	0.113732	0.652638	0.704235	0.78611	0.136485	0.0654491
cg00338893	0.0258372	0.0219666	0.0277313	0.023449	0.0282254	0.0244372	0.0283901	0.0257549	0.0321784	0.0301196	0.027896	0.024849	0.0280607	0.0226255	0.0246843	0.024849	0.026249	0.0246843	0.0226255	0.0273196	0.0240254	0.0237784	0.0291313	0.0267431	0.0241078	0.0426372	0.034896	0.0269901	0.0249313	0.0223784	0.0287196	0.0233666	0.0268254	0.0247666	0.027649	0.0255078	0.0238607	0.0240254	0.0242725	0.0252607	0.024849	0.0231196	0.0254254	0.0265784	0.0229549	0.0241078	0.0291313	0.0191666	0.0288843
cg00342530	0.498646	0.241362	0.7223	0.553259	0.579265	0.357763	0.556756	0.418564	0.588681	0.428787	0.653338	0.418116	0.43094	0.40027	0.283869	0.588681	0.517568	0.684725	0.299473	0.53909	0.184597	0.273736	0.574871	0.214997	0.579983	0.513891	0.425918	0.724094	0.481876	0.555411	0.383769	0.758978	0.639349	0.639439	0.641232	0.467079	0.748037	0.513622	0.631726	0.360453	0.329605	0.427801	0.578369	0.494252	0.34745	0.396324	0.58913	0.776734	0.745257
cg00343092	0.033088	0.023301	0.0206318	0.0206318	0.0353123	0.0393161	0.0308637	0.0424301	0.0152934	0.0170729	0.016628	0.0375366	0.0308637	0.0379815	0.0170729	0.0321983	0.0321983	0.0344226	0.0201869	0.0468788	0.0295291	0.0228561	0.0228561	0.0277496	0.0304188	0.0353123	0.062449	0.0224113	0.0366469	0.0161832	0.0188524	0.0499928	0.0224113	0.0406507	0.0317534	0.0539966	0.0580003	0.0455442	0.00995509	0.0277496	0.0228561	0.0313085	0.0344226	0.0553312	0.0402058	0.0273048	0.0206318	0.0108448	0.0344226
cg00344358	0.880304	0.672982	0.865008	0.878551	0.88196	0.867736	0.880694	0.883324	0.901348	0.880791	0.904855	0.881863	0.915085	0.843867	0.848154	0.878161	0.8918	0.905245	0.877576	0.611701	0.892775	0.893359	0.893846	0.887027	0.88576	0.912552	0.889852	0.919469	0.867054	0.904661	0.874751	0.909045	0.890729	0.894236	0.901835	0.900082	0.753553	0.888878	0.901933	0.855753	0.879914	0.886052	0.878063	0.876212	0.887221	0.876894	0.893262	0.899107	0.877869
cg00344372	0.547491	0.416652	0.545696	0.48995	0.575015	0.55138	0.461229	0.417351	0.668756	0.529042	0.502814	0.400697	0.529241	0.515579	0.317726	0.488454	0.560555	0.526549	0.529142	0.479479	0.374768	0.433705	0.488853	0.492543	0.5081	0.422736	0.582993	0.455445	0.396109	0.524455	0.57302	0.589475	0.617398	0.616799	0.625675	0.583691	0.585785	0.476387	0.430813	0.637143	0.660379	0.51897	0.483069	0.480177	0.493341	0.601841	0.609918	0.645919	0.481374
cg00346145	0.0593708	0.0901768	0.0867077	0.0661703	0.0651989	0.0855975	0.0588157	0.0731086	0.0554853	0.106968	0.0736637	0.0497959	0.0507673	0.0611747	0.0464655	0.0758839	0.0556241	0.0804632	0.0425801	0.0646439	0.0522937	0.0885116	0.0597871	0.0552078	0.0725535	0.0731086	0.0611747	0.0586769	0.0581219	0.0484083	0.0739412	0.0529875	0.0546527	0.0602034	0.0695007	0.0574281	0.0837936	0.0468818	0.0475757	0.0678355	0.0953112	0.0611747	0.0803244	0.0663091	0.0589545	0.0579831	0.0640888	0.0493796	0.0658928
cg00347729	0.248119	0.194383	0.156603	0.191246	0.37346	0.227525	0.0990474	0.352183	0.225479	0.370187	0.227934	0.176925	0.2934	0.156058	0.0949557	0.262304	0.194655	0.217568	0.24771	0.17747	0.0930463	0.297219	0.274306	0.169696	0.200793	0.210749	0.545172	0.218796	0.195746	0.282898	0.127552	0.206794	0.857501	0.172151	0.370187	0.346182	0.221796	0.281125	0.173652	0.185517	0.181426	0.231889	0.226434	0.354366	0.196019	0.199156	0.30663	0.0991838	0.381643
cg00347904	0.591615	0.697746	0.335015	0.105205	0.73751	0.226924	0.149169	0.86959	0.877711	0.665729	0.830386	0.77046	0.845508	0.0748681	0.0564796	0.658915	0.692612	0.103991	0.525715	0.678144	0.908514	0.197054	0.0969904	0.854282	0.722948	0.883311	0.811437	0.891059	0.890032	0.828612	0.925876	0.629232	0.403435	0.09307	0.0967104	0.500139	0.0727213	0.74059	0.895446	0.540929	0.827306	0.699332	0.587788	0.613084	0.603843	0.0683341	0.89974	0.910661	0.724442
cg00350296	0.560893	0.814564	0.781052	0.770849	0.452968	0.754489	0.716843	0.760382	0.714996	0.660286	0.668642	0.666795	0.659406	0.729421	0.784219	0.669345	0.671544	0.749211	0.63944	0.615075	0.799171	0.576901	0.539783	0.69283	0.69371	0.730916	0.727925	0.694501	0.70919	0.598011	0.634778	0.606367	0.366594	0.799171	0.589567	0.528524	0.720185	0.610238	0.778765	0.727486	0.672072	0.546996	0.681659	0.604608	0.608127	0.696436	0.658702	0.68078	0.508382
cg00350478	0.394856	0.240187	0.231769	0.149271	0.488466	0.188443	0.24434	0.246248	0.338848	0.337164	0.288563	0.324256	0.265329	0.214147	0.265553	0.416968	0.297543	0.222228	0.335929	0.292267	0.132883	0.280594	0.286992	0.223687	0.258482	0.358266	0.37499	0.382173	0.204494	0.308654	0.138608	0.374765	0.576913	0.188555	0.417305	0.413152	0.361633	0.373194	0.324144	0.200678	0.214483	0.322797	0.300012	0.324144	0.275543	0.285757	0.287665	0.17778	0.36702
cg00350702	0.0339071	0.035601	0.0443525	0.0313663	0.0446348	0.0358833	0.0302371	0.0248732	0.035601	0.0262848	0.0248732	0.0322133	0.0316486	0.0260025	0.031931	0.0308017	0.0324956	0.0353187	0.0322133	0.0288256	0.0147101	0.027414	0.0341894	0.0437879	0.0226148	0.0505633	0.0288256	0.0296725	0.0203563	0.0276963	0.0248732	0.020074	0.0308017	0.0228971	0.0308017	0.0375771	0.0268494	0.0528218	0.027414	0.0381417	0.0381417	0.039271	0.0404002	0.0364479	0.0353187	0.0240263	0.0446348	0.016404	0.0336248
cg00351011	0.0518521	0.504853	0.0543966	0.0565901	0.0662414	0.610053	0.061679	0.499588	0.660942	0.357362	0.663837	0.546441	0.133889	0.0511502	0.0879132	0.591715	0.28445	0.0513257	0.561445	0.0561514	0.189604	0.179075	0.0584326	0.0536946	0.301033	0.79457	0.350606	0.667259	0.758157	0.0791392	0.823436	0.101601	0.292171	0.0543966	0.0756296	0.497483	0.104935	0.532666	0.546003	0.154508	0.467914	0.500466	0.0551862	0.0507992	0.300243	0.0615912	0.681912	0.061328	0.0606261
cg00354258	0.923703	0.911789	0.927646	0.941446	0.856076	0.934417	0.922846	0.921989	0.909646	0.935103	0.911018	0.912732	0.915475	0.906218	0.928846	0.921389	0.932189	0.929017	0.89319	0.898247	0.903647	0.89079	0.878362	0.89559	0.920189	0.944446	0.862419	0.922675	0.893447	0.851619	0.936303	0.884704	0.882561	0.946331	0.802421	0.907246	0.798392	0.902789	0.906389	0.861733	0.906389	0.925589	0.918132	0.895847	0.886418	0.856162	0.918903	0.93416	0.88359
cg00354572	0.554477	0.719083	0.614839	0.78453	0.332428	0.731325	0.609471	0.74319	0.588283	0.517657	0.662299	0.673223	0.657214	0.47999	0.555795	0.567754	0.57218	0.724827	0.429045	0.100398	0.753266	0.583763	0.4669	0.800067	0.587906	0.459179	0.627269	0.507863	0.698648	0.491572	0.84169	0.606081	0.0906043	0.746956	0.461533	0.272726	0.301635	0.557208	0.709289	0.442699	0.681039	0.672846	0.590355	0.477259	0.571992	0.390059	0.652035	0.707877	0.550616
cg00355802	0.0371556	0.0570756	0.0342825	0.0304518	0.0417525	0.0293025	0.0366767	0.0399329	0.0441467	0.0588952	0.0301644	0.0322714	0.0367725	0.0434763	0.0451044	0.0507548	0.0318883	0.031601	0.0397414	0.0349529	0.0248014	0.0548729	0.0430933	0.0334206	0.0351444	0.0349529	0.036581	0.0274829	0.0332291	0.0374429	0.0389752	0.0331333	0.0347614	0.0329417	0.0591825	0.0372514	0.0389752	0.036581	0.0417525	0.0445298	0.0349529	0.034091	0.0464452	0.0326544	0.035719	0.0484563	0.0404117	0.0222156	0.0373471
cg00359325	0.053967	0.0833111	0.0785173	0.0650074	0.0538218	0.0591967	0.0597777	0.0573082	0.0590514	0.0597777	0.0535312	0.0535312	0.06646	0.0782267	0.0488827	0.0963851	0.0651526	0.0510617	0.0485922	0.0525144	0.0459773	0.0661695	0.0522238	0.0570177	0.0600683	0.0574535	0.0962399	0.0562913	0.051207	0.0487374	0.0424909	0.049028	0.0552745	0.0586156	0.0645716	0.0610852	0.0557103	0.0568724	0.0629736	0.0526596	0.0461226	0.0548387	0.0548387	0.053967	0.0467037	0.0587609	0.0618115	0.041474	0.0557103
cg00359973	0.0827957	0.0455401	0.0601486	0.042371	0.0456174	0.0785445	0.0427575	0.0496367	0.0469314	0.0492502	0.0429894	0.0310861	0.0310861	0.0332504	0.0364194	0.039202	0.399391	0.0422165	0.0389701	0.0262939	0.0232022	0.0386609	0.041057	0.438734	0.389807	0.0468541	0.0583709	0.0317818	0.0429894	0.0221974	0.0419073	0.0302359	0.0277625	0.0362648	0.0559748	0.0991047	0.044999	0.0300813	0.0341006	0.0355692	0.0344098	0.0421392	0.0759939	0.0470087	0.0297721	0.0437623	0.052883	0.0231249	0.0811725
cg00363813	0.585504	0.71217	0.735555	0.776478	0.545014	0.72094	0.696905	0.728085	0.610621	0.597088	0.644398	0.624803	0.659555	0.676444	0.71282	0.66172	0.66919	0.697663	0.673737	0.63996	0.733498	0.563202	0.617116	0.778968	0.705999	0.711629	0.705458	0.638444	0.704917	0.644182	0.813937	0.613544	0.515783	0.779293	0.610621	0.553242	0.68792	0.63119	0.717367	0.657823	0.662586	0.631623	0.669948	0.587994	0.668757	0.654683	0.667566	0.736962	0.603908
cg00364814	0.878758	0.938479	0.91112	0.902749	0.885598	0.912651	0.874981	0.926739	0.944706	0.874573	0.91163	0.940725	0.900094	0.950933	0.897236	0.906526	0.917347	0.900401	0.82455	0.910507	0.841191	0.770853	0.902646	0.914693	0.927045	0.89448	0.911834	0.9591	0.869264	0.895092	0.924085	0.929393	0.928781	0.929087	0.870183	0.8808	0.883352	0.903055	0.903769	0.89254	0.891315	0.950933	0.90867	0.92827	0.94491	0.893765	0.873756	0.969003	0.911528
cg00367281	0.515559	0.716106	0.24378	0.1541	0.524052	0.336656	0.449258	0.304145	0.792818	0.645056	0.677476	0.346336	0.831996	0.399304	0.505057	0.446975	0.22104	0.367432	0.336108	0.28999	0.358482	0.66807	0.513459	0.173643	0.342044	0.649897	0.466427	0.586518	0.711997	0.515011	0.393825	0.381313	0.543596	0.604783	0.49145	0.586883	0.217935	0.3583	0.334647	0.305332	0.568984	0.589623	0.278117	0.391633	0.33209	0.272547	0.78533	0.344145	0.385423
cg00367438	0.0713765	0.0901963	0.0654811	0.057545	0.0566381	0.0566381	0.0652544	0.0521032	0.070923	0.0663881	0.0752312	0.061173	0.103348	0.0509694	0.0777254	0.0516497	0.0595857	0.058452	0.0808998	0.0570916	0.0684288	0.0670683	0.0607195	0.0516497	0.057545	0.0663881	0.0561846	0.0663881	0.0555043	0.0706963	0.102667	0.0475683	0.0840742	0.0577718	0.0534636	0.0616265	0.0466613	0.0573183	0.0659346	0.0659346	0.0511962	0.0573183	0.057545	0.059359	0.0679753	0.0439403	0.0625334	0.0457543	0.0702428
cg00368022	0.043797	0.0415614	0.0348547	0.0523667	0.0355998	0.0376491	0.0372765	0.0264712	0.0376491	0.0454737	0.0249808	0.0259123	0.0231178	0.0326191	0.0210685	0.033178	0.0469641	0.0484545	0.0247945	0.0404436	0.0281479	0.0262849	0.0342958	0.0443559	0.0324328	0.0434244	0.020696	0.0214411	0.0268438	0.023863	0.0285205	0.0262849	0.0192056	0.0301972	0.0311287	0.038208	0.0404436	0.0352273	0.0288931	0.0372765	0.0564653	0.0460326	0.0432381	0.0355998	0.0376491	0.0264712	0.033178	0.018833	0.0315013
cg00368415	0.0414751	0.0329346	0.0363059	0.0385534	0.0392276	0.0396771	0.0338336	0.0349574	0.0358564	0.0369801	0.0259673	0.0318108	0.0311366	0.0419246	0.0261921	0.0488919	0.0378791	0.0367554	0.0340584	0.0333841	0.0257426	0.0369801	0.0351821	0.0423741	0.0360811	0.0264168	0.0291138	0.0255178	0.0405761	0.0248436	0.0255178	0.0313613	0.0309118	0.0410256	0.0574324	0.0378791	0.0358564	0.0365306	0.0331594	0.0425989	0.0313613	0.0378791	0.0295633	0.0369801	0.0306871	0.0390029	0.0486672	0.0216971	0.0363059
cg00371195	0.943391	0.949774	0.94049	0.947646	0.913604	0.944552	0.942231	0.931979	0.934107	0.881303	0.97105	0.923662	0.949	0.918053	0.870084	0.942811	0.941844	0.939523	0.949387	0.93991	0.858479	0.881303	0.928885	0.937202	0.938556	0.931979	0.931592	0.962733	0.932946	0.952869	0.939523	0.954223	0.903546	0.878208	0.930625	0.932753	0.940683	0.916312	0.952095	0.899678	0.931786	0.951902	0.875887	0.915345	0.869891	0.942231	0.939136	0.937589	0.945132
cg00374717	0.938272	0.912828	0.928742	0.919212	0.937624	0.90848	0.933831	0.939752	0.941695	0.902003	0.953445	0.935866	0.935311	0.923468	0.927817	0.937069	0.917084	0.924949	0.945118	0.917732	0.94993	0.783483	0.922451	0.896452	0.89969	0.932905	0.933461	0.956221	0.934756	0.945951	0.958257	0.932535	0.93198	0.941047	0.943546	0.907092	0.937069	0.923006	0.933368	0.915326	0.896452	0.947431	0.925966	0.926059	0.889883	0.909868	0.923468	0.945488	0.628601
cg00375964	0.035124	0.0423882	0.0434916	0.0324574	0.0420204	0.0398136	0.0382504	0.0395377	0.0362274	0.0478134	0.0363194	0.033193	0.031354	0.0373309	0.0316299	0.123949	0.0365033	0.035216	0.0328252	0.0414687	0.0319977	0.0438594	0.0333769	0.0353999	0.0413767	0.0362274	0.0474455	0.0355838	0.0375148	0.0346643	0.0444111	0.0341126	0.0342965	0.0358596	0.0363194	0.0344804	0.0410089	0.0384343	0.0322735	0.037147	0.042848	0.0364114	0.0394458	0.0373309	0.0385262	0.0356757	0.0377906	0.0335609	0.0367792
cg00376639	0.058025	0.0273859	0.0666211	0.0555075	0.0673579	0.0650861	0.0733752	0.0432887	0.0631212	0.0833222	0.045008	0.046543	0.0308858	0.0507797	0.0330348	0.0536041	0.0585776	0.0509639	0.0408327	0.060174	0.0230878	0.0495516	0.0555075	0.0477096	0.0698139	0.0779189	0.070735	0.0612792	0.0612792	0.0283683	0.0532357	0.0428589	0.0392363	0.0606038	0.0617704	0.0515165	0.0478938	0.0579022	0.0394819	0.0490604	0.04992	0.0515165	0.0480166	0.0661913	0.0454992	0.0625072	0.0699368	0.0354908	0.0725156
cg00380464	0.0556365	0.0467044	0.0609475	0.0578092	0.052981	0.0735007	0.0488771	0.0380137	0.0498427	0.0481528	0.0435661	0.0430833	0.0430833	0.0633616	0.035841	0.0575678	0.0457388	0.0467044	0.0428419	0.0725351	0.0401864	0.0522568	0.0556365	0.0652928	0.0657756	0.052981	0.0611889	0.0336684	0.0442903	0.0353582	0.0389793	0.0450145	0.0409106	0.0534638	0.0498427	0.0515326	0.0619131	0.0496013	0.0397036	0.0503255	0.0959516	0.04767	0.0679483	0.0522568	0.046463	0.0503255	0.0496013	0.0380137	0.0549123
cg00381076	0.0384094	0.0462507	0.0332413	0.0336868	0.0376075	0.0359145	0.0360927	0.0351125	0.0476764	0.0318156	0.0338651	0.0378748	0.0326176	0.0350234	0.030479	0.0411717	0.0370729	0.0442904	0.0357363	0.0334195	0.0356472	0.0357363	0.03636	0.0379639	0.0434885	0.0489239	0.041439	0.13803	0.0370729	0.0370729	0.0333304	0.0550722	0.0319047	0.0340433	0.0381421	0.0409935	0.0395678	0.0369838	0.039746	0.0429538	0.0419737	0.0375184	0.0343106	0.0368055	0.0325285	0.0349343	0.0491021	0.0281623	0.0399242
cg00382515	0.0334304	0.0344813	0.0386847	0.0252864	0.0297525	0.0276508	0.0273881	0.0223966	0.0250237	0.0218712	0.0258118	0.0289644	0.0273881	0.0279135	0.0242356	0.0276508	0.0289644	0.0378965	0.0289644	0.036583	0.0192441	0.022922	0.0273881	0.0294898	0.0237101	0.0405236	0.0263373	0.0266	0.0223966	0.0192441	0.0263373	0.0273881	0.0231847	0.0281762	0.0263373	0.0318542	0.0360575	0.0281762	0.0221339	0.0323796	0.0394728	0.0300152	0.0273881	0.0276508	0.0260745	0.021083	0.024761	0.0281762	0.0292271
cg00386408	0.214901	0.0586808	0.135703	0.0390049	0.154687	0.0373241	0.171495	0.123641	0.118994	0.17723	0.173275	0.088936	0.10525	0.098329	0.0969448	0.131649	0.0901225	0.0446407	0.0588785	0.147172	0.0329737	0.0502765	0.0836957	0.0364342	0.0570988	0.0450362	0.175648	0.191171	0.0295131	0.0952639	0.0259537	0.183558	0.10703	0.0329737	0.0597684	0.133034	0.129771	0.120674	0.0558134	0.0482002	0.0758847	0.398904	0.109897	0.235071	0.141042	0.0684692	0.0275356	0.0309962	0.151127
cg00387170	0.111777	0.176864	0.108372	0.0981545	0.114048	0.0932352	0.0970193	0.130698	0.148483	0.128806	0.0996682	0.113291	0.145078	0.0992898	0.112534	0.100425	0.0970193	0.093992	0.100047	0.0951272	0.0860453	0.113669	0.10156	0.10648	0.101939	0.103831	0.123887	0.11821	0.0958841	0.0970193	0.101939	0.0920999	0.121616	0.0932352	0.101939	0.0973977	0.125779	0.121995	0.0902079	0.107615	0.124643	0.0932352	0.101939	0.0917215	0.120102	0.0849101	0.109507	0.093992	0.0970193
cg00392257	0.348579	0.185421	0.222656	0.144094	0.427141	0.287612	0.170588	0.136934	0.479106	0.288942	0.497416	0.264494	0.279736	0.188797	0.163223	0.265005	0.288431	0.201276	0.279838	0.246899	0.122306	0.231964	0.319426	0.151869	0.309708	0.226747	0.288533	0.263675	0.205061	0.238409	0.0810814	0.420185	0.493529	0.142355	0.361877	0.37313	0.211199	0.288533	0.21437	0.155347	0.174373	0.349909	0.234215	0.303365	0.240353	0.266642	0.464785	0.12384	0.32362
cg00393585	0.00548346	0.755429	0.293174	0.352496	0.525405	0.677804	0.678632	0.747151	0.729676	0.378617	0.679367	0.662996	0.567161	0.479879	0.758832	0.00557543	0.426626	0.753589	0.667411	0.280114	0.447044	0.425615	0.654259	0.0477909	0.259972	0.768673	0.570748	0.657846	0.708063	0.571391	0.314052	0.522186	0.260064	0.506735	0.00391992	0.318099	0.0129332	0.567345	0.760303	0.653063	0.330791	0.639359	0.309269	0.60864	0.625471	0.367948	0.732987	0.279654	0.314696
cg00394658	0.310583	0.188949	0.388689	0.277876	0.575167	0.36363	0.317091	0.316196	0.708761	0.263475	0.478429	0.440678	0.203919	0.179592	0.154777	0.462645	0.557756	0.257291	0.226212	0.296995	0.397313	0.254607	0.261197	0.422372	0.40553	0.201315	0.54124	0.493074	0.117433	0.522201	0.72544	0.543599	0.265997	0.452638	0.205302	0.347764	0.301714	0.372173	0.302853	0.152987	0.580212	0.52269	0.287558	0.515204	0.483718	0.180487	0.562475	0.541972	0.648392
cg00396163	0.0197596	0.0154388	0.0865882	0.0178392	0.021776	0.0208158	0.0203357	0.0287853	0.0266729	0.0900449	0.0170711	0.0144786	0.155145	0.19989	0.0136144	0.0245605	0.0145746	0.0206238	0.0169751	0.0181273	0.227735	0.0412677	0.0227362	0.0236003	0.0223521	0.022064	0.0212959	0.0151507	0.0192795	0.0140945	0.0185114	0.0169751	0.0144786	0.0199516	0.0284972	0.027249	0.0208158	0.0334902	0.0132304	0.0175512	0.0225441	0.0199516	0.0169751	0.124035	0.163595	0.0185114	0.022064	0.00910157	0.0260008
cg00396894	0.70041	0.484927	0.647684	0.514262	0.65704	0.648756	0.730817	0.882659	0.569229	0.512606	0.486194	0.509	0.778865	0.313886	0.595544	0.787636	0.401794	0.383667	0.710643	0.579463	0.868333	0.403938	0.493016	0.877884	0.420994	0.708889	0.348094	0.534826	0.491847	0.764148	0.511339	0.682965	0.517284	0.743682	0.672244	0.703918	0.673609	0.563869	0.618252	0.665812	0.652947	0.580047	0.851764	0.58073	0.778183	0.643201	0.860731	0.45452	0.41271
cg00397740	0.0306617	0.0269988	0.0276935	0.0288302	0.0337561	0.0346403	0.0319879	0.029967	0.032051	0.0360296	0.02542	0.0260515	0.027062	0.0251042	0.0261147	0.029146	0.0288934	0.0338824	0.0261778	0.0273146	0.024157	0.0405766	0.0306617	0.0274409	0.0308511	0.0287671	0.0300301	0.0288934	0.0321142	0.0256095	0.0256095	0.0346403	0.0252937	0.0288934	0.0375453	0.0297775	0.0300301	0.0305354	0.0254832	0.0292723	0.0345771	0.0305354	0.0244096	0.0306617	0.0323668	0.0304722	0.046134	0.0191679	0.0321773
cg00398048	0.600269	0.144114	0.237478	0.192362	0.673149	0.419551	0.232399	0.194732	0.359791	0.161128	0.147923	0.239594	0.328895	0.246197	0.132687	0.19651	0.227405	0.164598	0.143014	0.326949	0.181189	0.164852	0.308327	0.277939	0.229267	0.232653	0.404823	0.290212	0.158165	0.169338	0.218179	0.16663	0.364277	0.247974	0.33025	0.160874	0.158504	0.232569	0.202435	0.163836	0.167053	0.656643	0.148262	0.282679	0.291821	0.399659	0.57276	0.278954	0.480834
cg00399483	0.60075	0.697266	0.68588	0.785739	0.634911	0.76387	0.744078	0.789625	0.783842	0.562614	0.759351	0.747332	0.639068	0.220651	0.730794	0.618463	0.289694	0.724829	0.734499	0.450464	0.476039	0.702237	0.752935	0.680186	0.736939	0.806344	0.770015	0.755917	0.776883	0.564421	0.84439	0.670517	0.215139	0.798933	0.270988	0.543907	0.626054	0.690669	0.767846	0.646117	0.770015	0.750314	0.662654	0.676391	0.702779	0.168236	0.778058	0.495107	0.536407
cg00400263	0.955625	0.956308	0.957748	0.755312	0.944783	0.953199	0.956914	0.958658	0.955777	0.957445	0.958506	0.956156	0.958127	0.952668	0.957521	0.951152	0.950166	0.957596	0.956838	0.956611	0.958355	0.955853	0.957066	0.95608	0.955928	0.957748	0.898837	0.956383	0.956383	0.95843	0.958734	0.955928	0.944404	0.95699	0.94774	0.954336	0.950621	0.956232	0.958506	0.94956	0.955246	0.955398	0.954336	0.950621	0.958355	0.955928	0.955625	0.958885	0.943039
cg00402366	0.0423575	0.0934672	0.0443125	0.0297896	0.0462676	0.0571598	0.031186	0.041799	0.0524119	0.0264381	0.029231	0.0286724	0.0376096	0.0367718	0.0247624	0.0309067	0.0359339	0.0563219	0.027276	0.0420782	0.0233659	0.0390061	0.0267174	0.0390061	0.0334203	0.064142	0.0370511	0.0300689	0.0306274	0.0214109	0.0323032	0.0239245	0.027276	0.0364925	0.0306274	0.0373303	0.0448711	0.043754	0.0216902	0.0281138	0.0524119	0.0395646	0.0373303	0.0390061	0.041799	0.0387268	0.0320239	0.0261588	0.0325824
cg00404599	0.495929	0.838335	0.46419	0.804265	0.58236	0.779071	0.484094	0.77665	0.7424	0.587201	0.655342	0.644045	0.457824	0.759973	0.777367	0.601188	0.667715	0.451548	0.63221	0.657225	0.463921	0.522199	0.735855	0.559407	0.692281	0.813858	0.700978	0.683136	0.777008	0.68466	0.897689	0.454776	0.453431	0.746973	0.649424	0.557793	0.579043	0.691205	0.732448	0.750649	0.760422	0.679908	0.595809	0.508392	0.711827	0.313743	0.740966	0.842638	0.701068
cg00405070	0.0312364	0.0478067	0.0388194	0.0419088	0.0312364	0.0391002	0.0273045	0.0360109	0.0256193	0.0421896	0.0315172	0.0303938	0.0365726	0.0346066	0.0295513	0.0348875	0.0309555	0.0461215	0.0284279	0.0416279	0.0230917	0.0391002	0.0351683	0.0348875	0.0306747	0.037696	0.0292704	0.0343258	0.0320789	0.0326406	0.0346066	0.043313	0.039662	0.0334832	0.0407854	0.0427513	0.0413471	0.0264619	0.0264619	0.039662	0.0360109	0.020564	0.0427513	0.0374151	0.0478067	0.0337641	0.0303938	0.0348875	0.0275853
cg00405568	0.0352054	0.0618111	0.0370961	0.0381766	0.0477655	0.0364209	0.03426	0.051682	0.0434437	0.0379065	0.0333146	0.0354755	0.0408777	0.0341249	0.0400673	0.0419581	0.0458747	0.0479005	0.0380415	0.0375013	0.0350703	0.0483057	0.03426	0.0431736	0.0348002	0.0395271	0.0411478	0.0362858	0.0333146	0.0940892	0.0370961	0.0335847	0.0364209	0.0354755	0.0508717	0.0393921	0.054113	0.0437138	0.0343951	0.0396622	0.044119	0.0385817	0.044119	0.0369611	0.0352054	0.0346652	0.0379065	0.0299383	0.0420932
cg00407150	0.767628	0.302469	0.494269	0.370499	0.666345	0.43691	0.41147	0.33172	0.84452	0.5118	0.597553	0.412709	0.366688	0.455013	0.429669	0.452631	0.497889	0.605842	0.466161	0.440054	0.6067	0.689308	0.410898	0.468448	0.532953	0.646432	0.459015	0.759053	0.43691	0.478547	0.462826	0.760006	0.553819	0.748572	0.512181	0.582117	0.386888	0.440816	0.563061	0.338962	0.687402	0.61861	0.471211	0.524473	0.680066	0.406611	0.617657	0.474641	0.45387
cg00410419	0.0510325	0.0659989	0.0542861	0.0481043	0.0646974	0.0494057	0.0669749	0.0412718	0.0477789	0.0507071	0.0474536	0.0500564	0.043224	0.0419225	0.0402957	0.0500564	0.0549368	0.0630707	0.0461522	0.0516832	0.0305351	0.043224	0.0614439	0.0591664	0.06242	0.0640467	0.0620946	0.0455014	0.0412718	0.0347647	0.0490804	0.0513579	0.0451761	0.0474536	0.0422479	0.0562382	0.048755	0.0692524	0.0399704	0.0442	0.0689271	0.0559128	0.0559128	0.0562382	0.0546114	0.0484296	0.0601425	0.0315111	0.0591664
cg00410898	0.0907727	0.221271	0.0381312	0.0801559	0.0532822	0.0725251	0.0786077	0.130696	0.0703133	0.22669	0.07717	0.0645625	0.241398	0.0839161	0.0899986	0.222266	0.0563788	0.242504	0.057927	0.141202	0.03979	0.311182	0.112338	0.0781653	0.0519551	0.135783	0.07717	0.0617977	0.051181	0.112449	0.185218	0.0496327	0.0368041	0.0793818	0.191743	0.130586	0.137774	0.0932057	0.0810407	0.271701	0.224036	0.0988459	0.153921	0.0815936	0.0455408	0.182785	0.503058	0.0244178	0.0860173
cg00411097	0.264063	0.151136	0.19635	0.108923	0.175672	0.173636	0.163779	0.112459	0.162279	0.306491	0.120601	0.27167	0.232456	0.153708	0.177386	0.171386	0.263956	0.1986	0.294063	0.144279	0.170958	0.208671	0.290848	0.212421	0.149529	0.173529	0.367668	0.208671	0.163136	0.226135	0.112887	0.235028	0.235992	0.146101	0.292777	0.35824	0.18435	0.181136	0.263956	0.133458	0.157886	0.158529	0.235885	0.179315	0.213278	0.271777	0.157672	0.153494	0.228707
cg00412772	0.358619	0.221716	0.356	0.185047	0.414429	0.236424	0.341393	0.266947	0.376349	0.448881	0.277626	0.358116	0.300695	0.269567	0.329305	0.351971	0.33555	0.27138	0.378767	0.352374	0.17185	0.260802	0.378364	0.219197	0.336961	0.298982	0.407679	0.450997	0.233301	0.324167	0.10083	0.43649	0.452004	0.202173	0.384308	0.4651	0.254758	0.374435	0.347941	0.206907	0.22091	0.365369	0.207915	0.466611	0.394785	0.339983	0.261004	0.223731	0.37917
cg00412805	0.943803	0.955793	0.952595	0.956432	0.942365	0.953874	0.94764	0.954833	0.952595	0.928297	0.951477	0.950997	0.952755	0.956112	0.951317	0.94748	0.937249	0.956112	0.945882	0.935651	0.955793	0.946201	0.943484	0.950837	0.94748	0.947001	0.909754	0.955633	0.956752	0.932773	0.951636	0.884017	0.93629	0.953874	0.955153	0.940606	0.942365	0.939487	0.962507	0.946361	0.944283	0.948439	0.940606	0.885936	0.916148	0.94716	0.922543	0.952595	0.949558
cg00415978	0.0645359	0.0694538	0.0512395	0.0415859	0.190943	0.0547002	0.0402198	0.0679055	0.060802	0.0576145	0.385472	0.171545	0.0158127	0.053152	0.0220055	0.0609841	0.0369413	0.0611663	0.0397645	0.0421323	0.0182716	0.0964109	0.044227	0.0558841	0.0439538	0.0642627	0.0720948	0.342213	0.0420413	0.0186359	0.214804	0.0564305	0.0241912	0.0313859	0.0744627	0.051877	0.0843895	0.0638073	0.0447734	0.0474145	0.0484163	0.0689073	0.0402198	0.0371234	0.0390359	0.0445913	0.44485	0.018818	0.087577
cg00415993	0.55466	0.88236	0.880677	0.875896	0.491529	0.420606	0.755477	0.887938	0.886079	0.818431	0.836317	0.649579	0.83552	0.726346	0.852343	0.684819	0.781686	0.871734	0.728471	0.623016	0.878552	0.834369	0.800191	0.202878	0.817103	0.743081	0.357386	0.801874	0.695887	0.786644	0.827728	0.758753	0.207747	0.691549	0.670475	0.649048	0.752024	0.546603	0.816838	0.855974	0.842515	0.802139	0.735112	0.384657	0.606724	0.274243	0.8465	0.717049	0.301603
cg00417297	0.0305369	0.0276758	0.029464	0.0316098	0.0260664	0.0312521	0.0255299	0.0233841	0.0239206	0.0258876	0.0194501	0.0242782	0.0212383	0.0262452	0.018556	0.0260664	0.0262452	0.0298216	0.0226688	0.0274969	0.0198077	0.0248147	0.0248147	0.0307157	0.0269605	0.0321462	0.0291063	0.0190925	0.024457	0.0183772	0.0285699	0.0253511	0.0194501	0.0239206	0.0276758	0.0271393	0.0300004	0.0233841	0.0190925	0.0266029	0.0307157	0.0242782	0.0301792	0.0267817	0.0273181	0.0237418	0.0280334	0.0189136	0.0276758
cg00418150	0.605106	0.755548	0.58308	0.287899	0.586129	0.633916	0.621232	0.741979	0.709727	0.610514	0.684948	0.467643	0.718577	0.547191	0.762431	0.545814	0.744535	0.542667	0.751025	0.658793	0.794388	0.569019	0.707367	0.773346	0.483277	0.754172	0.51897	0.709334	0.76076	0.683572	0.85486	0.576001	0.443946	0.811202	0.643356	0.52723	0.536768	0.689472	0.702648	0.612382	0.742864	0.677377	0.520052	0.623887	0.656925	0.439423	0.729098	0.796453	0.636178
cg00419564	0.0295609	0.0259899	0.0261247	0.0280112	0.0276744	0.0287524	0.0263268	0.0253835	0.0278091	0.0256531	0.0259226	0.0290219	0.0280112	0.028685	0.0259226	0.0272027	0.0300325	0.0298978	0.0261247	0.0280112	0.0263942	0.029763	0.0274048	0.0284829	0.0273375	0.0249119	0.0260573	0.0261247	0.0272701	0.0267985	0.0258552	0.0350858	0.0274048	0.0272701	0.0264616	0.0291566	0.0274722	0.0261921	0.0252488	0.0275396	0.0327276	0.0267311	0.0271353	0.0270006	0.0317843	0.0265289	0.0274048	0.0246424	0.0258552
cg00420568	0.0426893	0.035025	0.0408611	0.0362204	0.0466268	0.0407908	0.0402986	0.0436736	0.035236	0.0452206	0.0327047	0.040158	0.0302437	0.0282749	0.0326344	0.0405798	0.0353063	0.0404392	0.0328453	0.0366423	0.0342516	0.0483847	0.040158	0.0402283	0.0407908	0.0578067	0.0470487	0.0392439	0.0400173	0.0306656	0.0328453	0.0308765	0.0315094	0.0427596	0.040158	0.0369938	0.0420564	0.0388923	0.0361501	0.0372048	0.0547129	0.047119	0.0468378	0.0493691	0.0370641	0.0360798	0.0412127	0.0251811	0.0527441
cg00420715	0.0273255	0.0264364	0.0328377	0.0299927	0.0319487	0.026792	0.0301705	0.0278589	0.0266142	0.0260808	0.0248361	0.0262586	0.0248361	0.0317709	0.0255473	0.0310596	0.0266142	0.0280368	0.0294593	0.0339046	0.023947	0.0253695	0.0275033	0.0282146	0.0260808	0.0379944	0.0257252	0.0255473	0.0260808	0.0216354	0.0251917	0.0225245	0.0246583	0.0269699	0.0260808	0.0303483	0.0250139	0.0255473	0.0243026	0.0278589	0.0305262	0.025903	0.0312374	0.0264364	0.0283924	0.025903	0.0271477	0.0209242	0.0241248
cg00420929	0.355158	0.133886	0.307504	0.228637	0.33853	0.27815	0.394173	0.175317	0.206993	0.284838	0.353765	0.3337	0.391201	0.207551	0.134258	0.393616	0.490782	0.219255	0.242107	0.240063	0.330727	0.175224	0.352093	0.213031	0.377174	0.320788	0.313542	0.348284	0.314564	0.232911	0.270532	0.409408	0.397146	0.17253	0.463379	0.475362	0.204206	0.299329	0.154973	0.392594	0.320973	0.664864	0.231238	0.269139	0.332771	0.334071	0.243407	0.154137	0.505738
cg00422913	0.0502492	0.0878901	0.0296936	0.0459779	0.045711	0.0414397	0.0470458	0.0425075	0.0686692	0.0473127	0.0497153	0.0366345	0.0470458	0.0387701	0.0350327	0.045711	0.0526518	0.0670675	0.0350327	0.0542536	0.0387701	0.0299606	0.0401049	0.0323632	0.0473127	0.0475797	0.0374353	0.0539866	0.0414397	0.0684023	0.0505162	0.0521179	0.0470458	0.0486475	0.0465118	0.0505162	0.0603936	0.0537197	0.0369014	0.0441092	0.0502492	0.0913605	0.0668005	0.070004	0.0435753	0.0414397	0.0606605	0.0246214	0.0406388
cg00424946	0.0267585	0.0232573	0.0224121	0.0248268	0.023378	0.0295354	0.0231365	0.0222914	0.0232573	0.0232573	0.0204804	0.023378	0.0228951	0.0253097	0.0206011	0.0298976	0.023378	0.0277244	0.023378	0.0241024	0.023378	0.0216877	0.0238609	0.0314672	0.0209633	0.0237402	0.0249475	0.0244646	0.0219292	0.0212048	0.0206011	0.0227743	0.0227743	0.0220499	0.0254305	0.0243439	0.0279659	0.0265171	0.0212048	0.0267585	0.027	0.0259134	0.0266378	0.0245853	0.0236195	0.0241024	0.0224121	0.0178243	0.0226536
cg00425710	0.751267	0.907732	0.776149	0.504969	0.819668	0.833088	0.668516	0.863654	0.666093	0.692186	0.835044	0.778292	0.625183	0.853962	0.306849	0.729741	0.886392	0.789102	0.725081	0.778199	0.759002	0.603749	0.886671	0.810256	0.807833	0.86356	0.823396	0.881639	0.475148	0.851353	0.859367	0.80131	0.779504	0.752199	0.7344	0.797676	0.749217	0.688178	0.594151	0.718838	0.873252	0.693583	0.663017	0.809231	0.843711	0.712314	0.909409	0.670193	0.763568
cg00425792	0.0719101	0.0605974	0.0580835	0.076519	0.0595499	0.0821753	0.0677202	0.0580835	0.0541031	0.0702341	0.0530556	0.058293	0.0696057	0.0777759	0.0593404	0.0750525	0.0962114	0.054941	0.0608069	0.0612259	0.0603879	0.0677202	0.0685582	0.0564075	0.0603879	0.0666727	0.0572455	0.0499132	0.0637398	0.0482372	0.0702341	0.0568265	0.0637398	0.0591309	0.0742145	0.057036	0.0633208	0.0698152	0.0614354	0.0817563	0.075681	0.0685582	0.0802899	0.0593404	0.0851082	0.0721196	0.0610164	0.0471898	0.0471898
cg00426056	0.0466597	0.0635516	0.0567948	0.0382137	0.0622847	0.0415921	0.0399029	0.0441259	0.0491935	0.0555279	0.0339907	0.0411698	0.0361022	0.047082	0.0382137	0.0407475	0.0373691	0.0369468	0.0432813	0.0479266	0.0348353	0.0373691	0.034413	0.0424367	0.038636	0.0855112	0.0770652	0.0390583	0.047082	0.0263893	0.0327238	0.0475043	0.0314569	0.0403252	0.0466597	0.0432813	0.042859	0.0441259	0.0377914	0.0529942	0.051305	0.0377914	0.0483489	0.0390583	0.0610178	0.0399029	0.0390583	0.0213217	0.0352576
cg00426498	0.134719	0.143275	0.115091	0.0992874	0.1471	0.116298	0.0927447	0.171962	0.18394	0.115493	0.124351	0.143677	0.0697949	0.0882151	0.0393965	0.108447	0.146294	0.0911342	0.114789	0.106736	0.0634535	0.109051	0.0994887	0.0913355	0.0831823	0.16552	0.183739	0.41676	0.082679	0.0712041	0.0447313	0.368042	0.117909	0.102005	0.144583	0.161393	0.123546	0.130793	0.131598	0.141463	0.103716	0.38153	0.106535	0.168741	0.0737205	0.104622	0.262352	0.0733179	0.125458
cg00426963	0.0443285	0.0345749	0.0298554	0.0367773	0.0427553	0.0204164	0.0144384	0.0229335	0.0166408	0.0229335	0.0282822	0.0245066	0.0194725	0.0163262	0.0191579	0.0257652	0.0160116	0.0292261	0.0150677	0.0245066	0.0197871	0.0128652	0.0285968	0.0330017	0.024192	0.0197871	0.0172701	0.0204164	0.0364627	0.00908965	0.024192	0.0144384	0.0270237	0.0238774	0.0260798	0.0251359	0.0260798	0.0134945	0.0201018	0.0285968	0.033631	0.0270237	0.018214	0.0323724	0.0408675	0.0314285	0.0251359	0.0175847	0.0311139
cg00427635	0.123279	0.12563	0.154336	0.160275	0.129961	0.199869	0.100266	0.115608	0.791423	0.132559	0.371606	0.106823	0.101627	0.124764	0.133673	0.139859	0.523547	0.128476	0.133797	0.135776	0.0965537	0.167451	0.113876	0.110659	0.120929	0.323228	0.14122	0.126249	0.117217	0.306772	0.168688	0.608797	0.130332	0.174256	0.161512	0.138869	0.11202	0.418747	0.0938317	0.13392	0.159409	0.125878	0.131198	0.153346	0.119939	0.124641	0.246144	0.0898723	0.154707
cg00430287	0.354442	0.21178	0.230265	0.17764	0.886526	0.208419	0.293326	0.260248	0.483748	0.448193	0.456772	0.36762	0.306151	0.209038	0.267324	0.481095	0.358156	0.235837	0.376641	0.388051	0.143678	0.353911	0.73732	0.185247	0.223809	0.295714	0.585106	0.438464	0.203113	0.329766	0.151019	0.474108	0.846991	0.4512	0.475169	0.570778	0.335691	0.449962	0.338787	0.307301	0.306682	0.376199	0.330473	0.543448	0.36479	0.313934	0.461195	0.169415	0.421129
cg00431050	0.338907	0.186017	0.297781	0.107951	0.447845	0.263456	0.234888	0.335454	0.292653	0.402532	0.370406	0.248701	0.375743	0.209458	0.156612	0.306048	0.316931	0.17032	0.327186	0.325617	0.105858	0.186122	0.460612	0.146147	0.273084	0.206947	0.461972	0.279467	0.120822	0.250375	0.147717	0.371975	0.435182	0.122183	0.275805	0.457263	0.313792	0.323419	0.284595	0.216888	0.305943	0.590688	0.268375	0.413206	0.265235	0.257177	0.357011	0.255085	0.309396
cg00431549	0.774734	0.280601	0.631059	0.927616	0.569772	0.715077	0.829691	0.870836	0.873618	0.774446	0.200707	0.594229	0.635087	0.879948	0.69647	0.734547	0.439333	0.647652	0.644103	0.767349	0.861149	0.842543	0.773966	0.508965	0.424947	0.859423	0.253554	0.8412	0.352054	0.425042	0.906323	0.694936	0.395118	0.890019	0.556153	0.465229	0.849256	0.737808	0.815784	0.42744	0.84379	0.777611	0.802356	0.548672	0.846187	0.459475	0.820771	0.906323	0.371045
cg00432979	0.0166333	0.0249718	0.0146529	0.0154867	0.0203856	0.0187179	0.019656	0.0170502	0.018301	0.0186137	0.0149656	0.0162163	0.0161121	0.0152783	0.0162163	0.016946	0.0179883	0.0163206	0.0153825	0.0167375	0.0129852	0.0188221	0.0167375	0.0187179	0.0170502	0.0259099	0.0216364	0.0139232	0.0125682	0.0131936	0.013819	0.0181968	0.0146529	0.0129852	0.013819	0.0176756	0.0173629	0.0181968	0.0135063	0.0156952	0.0215322	0.0192391	0.018301	0.0163206	0.0162163	0.0159036	0.0189264	0.0118386	0.0191348
cg00433406	0.864725	0.902563	0.904665	0.929469	0.803344	0.787894	0.761302	0.921271	0.915911	0.881331	0.922427	0.796092	0.922217	0.890896	0.89016	0.867353	0.878914	0.904244	0.747744	0.890686	0.937247	0.854109	0.832037	0.876602	0.897833	0.81953	0.43264	0.926631	0.889635	0.794725	0.916541	0.845701	0.833719	0.907187	0.862728	0.803449	0.883644	0.720942	0.911286	0.903193	0.902983	0.902983	0.86998	0.855476	0.871136	0.878599	0.886166	0.898253	0.805866
cg00434413	0.913099	0.931367	0.936963	0.930416	0.942138	0.945305	0.908664	0.93464	0.947101	0.594941	0.952697	0.936647	0.943405	0.938336	0.880153	0.930839	0.87255	0.936858	0.911093	0.859457	0.951219	0.678678	0.940976	0.678572	0.937914	0.941715	0.937597	0.950585	0.935168	0.799267	0.952803	0.946467	0.95048	0.946889	0.934429	0.941082	0.853121	0.931789	0.949635	0.608774	0.946678	0.941293	0.715847	0.889762	0.94615	0.943933	0.942454	0.885855	0.946045
cg00435408	0.0292324	0.0402902	0.0280476	0.0367359	0.0448318	0.0351562	0.0323918	0.0533227	0.0535201	0.0460166	0.0321943	0.0278502	0.0244933	0.031207	0.0189644	0.0280476	0.0292324	0.0341689	0.0282451	0.0290349	0.0207416	0.0331816	0.0294299	0.033774	0.033774	0.0523354	0.0892606	0.0359461	0.0270603	0.0294299	0.0339715	0.0341689	0.0270603	0.0369334	0.0387105	0.0341689	0.0219263	0.0379207	0.0177796	0.0294299	0.0468065	0.0321943	0.0355512	0.0393029	0.0264679	0.0274552	0.0473988	0.0146203	0.0416725
cg00436282	0.81567	0.953776	0.525085	0.701454	0.652912	0.271715	0.43295	0.331964	0.953586	0.956441	0.512045	0.499196	0.987184	0.271525	0.654339	0.648914	0.318734	0.662144	0.55421	0.914181	0.856502	0.956346	0.566298	0.274951	0.748758	0.899904	0.517566	0.834135	0.266956	0.425622	0.455603	0.960058	0.765986	0.425431	0.742476	0.725153	0.412772	0.708973	0.605131	0.672804	0.398495	0.731435	0.395259	0.514805	0.394402	0.354236	0.934835	0.9454	0.539076
cg00436301	0.0318762	0.0309732	0.0289865	0.0242906	0.032418	0.0322374	0.0325986	0.0351271	0.0342241	0.0360302	0.0259161	0.0268192	0.032418	0.0322374	0.0289865	0.0363914	0.0269998	0.0342241	0.0316956	0.0221233	0.0255549	0.0374751	0.0318762	0.0371138	0.0327792	0.0269998	0.0277222	0.0244713	0.0309732	0.0250131	0.0257355	0.0259161	0.0277222	0.0306119	0.0470473	0.0336823	0.031515	0.0298895	0.0446994	0.0403648	0.0244713	0.0345853	0.0260967	0.0363914	0.0297089	0.0304313	0.0327792	0.0170663	0.0342241
cg00436603	0.636552	0.42751	0.488045	0.376803	0.474788	0.349363	0.423895	0.278354	0.869419	0.418518	0.327485	0.46765	0.469041	0.306813	0.399978	0.417406	0.416664	0.263336	0.368367	0.414532	0.165999	0.343152	0.404428	0.232188	0.29606	0.833543	0.497778	0.737412	0.291517	0.332584	0.341854	0.707098	0.814539	0.608649	0.616622	0.641466	0.325261	0.522344	0.482204	0.405911	0.46524	0.690505	0.35029	0.35131	0.539401	0.494719	0.406096	0.208364	0.583805
cg00441382	0.0362141	0.0235336	0.0384612	0.0285095	0.0580437	0.0309172	0.0264228	0.0225705	0.02241	0.0252992	0.0201629	0.0230521	0.0203234	0.0309172	0.022089	0.0301146	0.0281885	0.0246572	0.0227311	0.0281885	0.0204839	0.0270649	0.0261018	0.0261018	0.0272254	0.0262623	0.0299541	0.0222495	0.0241757	0.0204839	0.0222495	0.021768	0.0203234	0.0262623	0.0244967	0.0251387	0.0272254	0.0278674	0.0248177	0.0270649	0.0270649	0.0249782	0.0318802	0.0254598	0.0262623	0.0272254	0.0288305	0.0187183	0.0235336
cg00443307	0.842741	0.266989	0.380742	0.615603	0.29984	0.304866	0.214771	0.270299	0.836244	0.490818	0.324601	0.194055	0.211951	0.208396	0.426954	0.230461	0.256815	0.563874	0.215874	0.304621	0.624061	0.408567	0.30793	0.262454	0.240512	0.337227	0.380987	0.248112	0.517417	0.28795	0.176036	0.951836	0.306582	0.350097	0.491553	0.535068	0.310382	0.24137	0.193687	0.272505	0.220287	0.21428	0.247131	0.352304	0.205822	0.32742	0.510553	0.135952	0.252892
cg00445824	0.093113	0.270637	0.144844	0.0607808	0.582844	0.095841	0.0941234	0.51424	0.531921	0.0856362	0.00985763	0.0381483	0.0290549	0.0861414	0.00531091	0.0649234	0.119282	0.0965483	0.0402701	0.0912943	0.0168293	0.0942244	0.10544	0.07725	0.0767448	0.635889	0.49969	0.531113	0.10746	0.0197594	-0.00843026	0.368442	0.0183448	0.115139	0.1113	0.534245	0.0946286	0.100489	0.0290549	0.100893	0.483524	0.635081	0.0916985	0.13373	0.0987711	0.0644182	0.581632	-0.0021659	0.123222
cg00446235	0.0705106	0.0527686	0.0956002	0.034489	0.0491844	0.053127	0.042912	0.0323385	0.0416575	0.0699729	0.0375356	0.0814425	0.11155	0.0669263	0.043808	0.0778582	0.0328761	0.0499012	0.0500804	0.0472131	0.0258869	0.0525894	0.0536647	0.154382	0.0654926	0.071765	0.0445249	0.0400446	0.0378941	0.0631629	0.0230195	0.0778582	0.0439873	0.0274998	0.0567113	0.128396	0.0504389	0.0597579	0.0443457	0.0396862	0.0651342	0.0450625	0.0393278	0.0434496	0.098826	0.0809048	0.0361019	0.0352059	0.188073
cg00447208	0.698368	0.62179	0.62475	0.730923	0.483709	0.73601	0.723894	0.67016	0.660357	0.560565	0.687085	0.518021	0.692819	0.644264	0.436911	0.559085	0.59053	0.629281	0.648796	0.587108	0.702623	0.564079	0.607085	0.595617	0.734345	0.749698	0.682276	0.578784	0.481027	0.658137	0.723247	0.6229	0.349605	0.760704	0.606807	0.57416	0.623455	0.636495	0.718068	0.633258	0.716218	0.527917	0.652865	0.531524	0.627524	0.553536	0.620033	0.614854	0.559085
cg00448720	0.484451	0.40286	0.338187	0.271813	0.600881	0.464228	0.479445	0.402459	0.753751	0.389945	0.464328	0.380635	0.490457	0.387643	0.275417	0.409267	0.328677	0.491458	0.393549	0.495663	0.417576	0.444005	0.483349	0.464028	0.395551	0.530902	0.429289	0.605185	0.3496	0.439801	0.36772	0.687677	0.53791	0.174204	0.392548	0.544618	0.426886	0.497665	0.295139	0.28633	0.667855	0.785286	0.468733	0.371324	0.373727	0.316663	0.580858	0.249188	0.534306
cg00449941	0.0336415	0.0490685	0.0305816	0.0313465	0.0438411	0.0239518	0.0345339	0.0369564	0.0403988	0.0382313	0.0248443	0.0318565	0.0256092	0.0287966	0.0294341	0.0409087	0.0349164	0.0336415	0.0268842	0.0238243	0.0229318	0.0449886	0.0295616	0.0367014	0.0347889	0.0328765	0.0328765	0.0230593	0.0350439	0.0193619	0.0291791	0.0229318	0.0253542	0.031729	0.0421837	0.034279	0.0341515	0.031984	0.0375938	0.0383588	0.0395063	0.0284141	0.0295616	0.0363189	0.0346614	0.0349164	0.034279	0.0143896	0.0350439
cg00451635	0.232094	0.144073	0.212563	0.116323	0.42926	0.192767	0.204079	0.225024	0.280524	0.253393	0.197009	0.242169	0.184372	0.170143	0.139742	0.25737	0.259137	0.178716	0.189939	0.244025	0.125867	0.221313	0.218308	0.146989	0.220782	0.212298	0.308716	0.277696	0.151054	0.21	0.155915	0.28238	0.388077	0.160952	0.330368	0.313134	0.177832	0.241109	0.182339	0.149905	0.171822	0.270096	0.219103	0.315255	0.237397	0.19754	0.211149	0.154678	0.322856
cg00453193	0.0321327	0.00960765	0.0336344	0.012611	0.0696745	0.028754	0.0325082	0.0336344	0.0310065	0.0670466	0.0118602	0.0133618	0.0317573	0.0148635	0.058412	0.0325082	0.0253752	0.0144881	0.0167406	0.012611	0.0512791	0.0524053	0.0403919	0.0159898	0.0355115	0.0396411	0.0313819	0.0388903	0.0381394	0.0392657	0.0234981	0.0246244	0.0321327	0.0448969	0.0689237	0.0231227	0.0403919	0.0186177	0.0452724	0.0392657	0.0159898	0.0321327	-0.00841242	0.0385148	0.00923223	0.0430199	0.0505282	0.0238735	0.0415182
cg00453258	0.745251	0.492481	0.702258	0.687044	0.65039	0.702489	0.426205	0.678169	0.761619	0.671138	0.569361	0.724619	0.594603	0.720355	0.687159	0.721046	0.75113	0.793085	0.710442	0.631026	0.767843	0.464126	0.701797	0.616849	0.747326	0.599214	0.758045	0.717588	0.492481	0.58884	0.746865	0.765192	0.65016	0.78663	0.730382	0.734071	0.770148	0.669754	0.685661	0.702489	0.81706	0.75332	0.717473	0.699723	0.718971	0.422632	0.738681	0.64797	0.743638
cg00459975	0.0542745	0.0529742	0.053841	0.0585223	0.0821017	0.0515871	0.0521073	0.0502868	0.0958852	0.056355	0.0552281	0.0560083	0.0501134	0.0515004	0.052194	0.0556615	0.0528008	0.053841	0.0507202	0.0554881	0.0486397	0.0565284	0.399037	0.0509803	0.0570485	0.0503735	0.0514138	0.0683181	0.0490731	0.0511537	0.0512404	0.0525407	0.0504602	0.0495933	0.0560083	0.0551414	0.0621632	0.0581755	0.0502001	0.0553148	0.0525407	0.0625966	0.0606895	0.0651106	0.0528875	0.0526274	0.440474	0.047166	0.0572219
cg00461841	0.652874	0.82539	0.763213	0.666172	0.792085	0.67348	0.724396	0.87451	0.802029	0.693727	0.675517	0.943277	0.759379	0.726553	0.645326	0.608307	0.786574	0.733022	0.848752	0.663057	0.641972	0.624001	0.802388	0.58866	0.708702	0.514621	0.66773	0.757702	0.719964	0.76477	0.67983	1.05841	0.649759	0.694805	0.75267	0.677913	0.563022	0.582669	0.676595	0.681986	0.610464	0.740091	0.651676	0.706905	0.746919	0.627715	0.678152	0.975025	0.730986
cg00462311	0.0552439	0.0590434	0.0656925	0.0795951	0.0580071	0.0525669	0.0613749	0.0826175	0.0615476	0.0906482	0.0564528	0.044968	0.0523079	0.0640518	0.054294	0.0753639	0.0456588	0.0841718	0.0530851	0.0494583	0.0767455	0.0937569	0.0455724	0.0564528	0.0532578	0.066815	0.0548985	0.0428092	0.071478	0.0489402	0.0730324	0.0435	0.0386643	0.0485084	0.0723416	0.0486811	0.0570573	0.0477312	0.0634473	0.0579208	0.0766592	0.0614612	0.0728597	0.0561074	0.0363328	0.0517034	0.0663833	0.0365055	0.0620657
cg00462994	0.0718718	0.0568405	0.0734881	0.0428597	0.182991	0.0907014	0.068316	0.0793067	0.0934491	0.103308	0.182183	0.0575678	0.192204	0.0509411	0.0472236	0.0599922	0.0697707	0.0476277	0.089166	0.0650835	0.0416475	0.0617701	0.0957119	0.0451225	0.0551434	0.313505	0.0743771	0.0550626	0.0478701	0.0442335	0.209174	0.11236	0.0649218	0.0506178	0.0685585	0.118905	0.0541736	0.111309	0.0501329	0.0526382	0.365792	0.289907	0.0576486	0.0972474	0.0629823	0.0475469	0.516024	0.0405969	0.0594265
cg00463202	0.83482	0.885965	0.652891	0.860214	0.852345	0.796312	0.903013	0.906828	0.892164	0.81038	0.902656	0.67137	0.841019	0.801319	0.845788	0.846623	0.823494	0.875235	0.776521	0.830647	0.876547	0.820037	0.789993	0.762692	0.851987	0.874997	0.824686	0.885846	0.829693	0.862121	0.870943	0.899437	0.841973	0.724065	0.76758	0.758042	0.832793	0.860094	0.895741	0.852226	0.81956	0.893714	0.892999	0.846623	0.865817	0.746359	0.884058	0.857829	0.825998
cg00463577	0.140373	0.041017	0.590218	0.0668743	0.0773234	0.0961851	0.0612955	0.574367	0.0388032	0.0475699	0.512027	0.0400429	0.0441163	0.0513776	0.402045	0.051112	0.0535029	0.0582847	0.516808	0.103358	0.776001	0.0572221	0.045179	0.0777662	0.0999928	0.573836	0.602793	0.0357924	0.0457988	0.0361466	0.0373864	0.113541	0.0721874	0.127267	0.056248	0.0768807	0.0699736	0.0559823	0.0390689	0.0601443	0.514949	0.0589931	0.0432308	0.054477	0.0482783	0.0510234	0.21821	0.516631	0.0550083
cg00463848	0.758075	0.290138	0.934007	0.850577	0.820445	0.497174	0.85487	0.796793	0.790799	0.808862	0.608873	0.345785	0.826196	0.347324	0.480245	0.810644	0.836645	0.926312	0.6386	0.71474	0.960413	0.357449	0.876983	0.430025	0.308039	0.600206	0.349835	0.746087	0.307148	0.870422	0.387095	0.858272	0.67181	0.938705	0.90509	0.887513	0.747059	0.532328	0.410909	0.861026	0.932063	0.870584	0.938219	0.689225	0.910193	0.79736	0.558977	0.96341	0.361823
cg00464269	0.0307441	0.0575365	0.0303845	0.0321826	0.033801	0.0287661	0.0314634	0.0400945	0.0276872	0.0276872	0.0248102	0.0257093	0.0345202	0.0235515	0.0260689	0.0289459	0.0354193	0.0305643	0.0267882	0.0321826	0.0237313	0.0309239	0.0285863	0.0278671	0.031823	0.0251698	0.0364982	0.0253496	0.0364982	0.0233717	0.0257093	0.02499	0.0228322	0.02499	0.0287661	0.0327221	0.0293056	0.0300248	0.0287661	0.0445899	0.0329019	0.0273276	0.036678	0.026968	0.0352395	0.0262487	0.0314634	0.0179772	0.0309239
cg00465284	0.0454559	0.0429943	0.0586374	0.0432325	0.35133	0.274147	0.0567316	0.672847	0.557707	0.0475205	0.559772	0.0455353	0.0410091	0.069119	0.506331	0.0764244	0.369752	0.0518084	0.195217	0.0549847	0.0407709	0.0692778	0.0497438	0.0489498	0.0522848	0.624091	0.391589	0.559533	0.0454559	0.0429943	0.0420414	0.284152	0.0457735	0.0464882	0.0502203	0.241987	0.0442648	0.553181	0.042359	0.0483145	0.264618	0.538094	0.407549	0.0600667	0.051729	0.0648311	0.493785	0.0376741	0.341404
cg00466249	0.293914	0.171537	0.200102	0.151085	0.286245	0.163534	0.188654	0.1622	0.27424	0.256456	0.164201	0.214997	0.245119	0.149195	0.230113	0.275685	0.323703	0.135857	0.211551	0.237338	0.141081	0.243451	0.227446	0.194989	0.168758	0.210328	0.39784	0.309697	0.14675	0.201547	0.102512	0.228001	0.488095	0.142415	0.387837	0.389837	0.211773	0.286022	0.174204	0.165979	0.173982	0.25101	0.256345	0.293581	0.262681	0.268683	0.205549	0.180095	0.267793
cg00466544	0.0349304	0.0395568	0.0342695	0.0589438	0.0360319	0.0384553	0.0360319	0.0371335	0.0338289	0.0311852	0.0256775	0.0298634	0.0322867	0.033168	0.0258979	0.0278806	0.0281009	0.0395568	0.0254572	0.0342695	0.0296431	0.0267791	0.0278806	0.0336086	0.0329477	0.0305243	0.0316258	0.0278806	0.0375741	0.0247963	0.0258979	0.0269994	0.0254572	0.0269994	0.0311852	0.0375741	0.0395568	0.0311852	0.0362523	0.038235	0.0419802	0.0294228	0.0501316	0.0287618	0.041099	0.0311852	0.0307446	0.0232542	0.0269994
cg00468146	0.105931	0.407496	0.186304	0.130676	0.525365	0.10697	0.159954	0.51932	0.638322	0.301056	0.624627	0.291611	0.378879	0.0827918	0.167037	0.147298	0.122553	0.0702305	0.135398	0.215771	0.0940308	0.540476	0.101586	0.0596525	0.22531	0.691495	0.41118	0.639455	0.0554025	0.160615	0.333734	0.366412	0.148054	0.0767472	0.114148	0.147959	0.178182	0.13162	0.104231	0.199243	0.397485	0.576743	0.142954	0.262994	0.235322	0.106875	0.671378	0.0722138	0.224366
cg00469635	0.0119092	0.00928595	0.0132208	0.0100014	0.0194211	0.0109553	0.0131015	0.017871	0.0156055	0.0145324	0.022402	0.0109553	0.00785511	0.00761664	0.00558961	0.0115514	0.017871	0.0121476	0.00868976	0.012863	0.00606656	0.0105975	0.0135785	0.0139362	0.0110745	0.0150093	0.0135785	0.0119092	0.0132208	0.0061858	0.0126246	0.00964366	0.00785511	0.0138169	0.0120284	0.0127438	0.0175133	0.015844	0.00904747	0.0125053	0.0114322	0.0181095	0.00928595	0.0167979	0.00892824	0.0122669	0.0123861	0.0061858	0.0200172
cg00471562	0.0533795	0.0353408	0.0500604	0.054101	0.0496274	0.0600177	0.0489059	0.0414018	0.0346193	0.0499161	0.035918	0.0398144	0.0313001	0.0496274	0.0334648	0.0432778	0.04804	0.052225	0.036351	0.0546783	0.0327432	0.0464526	0.0369282	0.0575645	0.0431335	0.0626153	0.0431335	0.0331762	0.0386599	0.0307229	0.0305786	0.0336091	0.0313001	0.0379384	0.0390929	0.0411132	0.0487616	0.0510705	0.0408246	0.0561214	0.0608836	0.0502047	0.0530909	0.0422677	0.0525136	0.0409689	0.0454425	0.0282696	0.0425563
cg00472814	0.50621	0.643717	0.634607	0.00733217	0.52889	0.710715	0.0171066	0.703787	0.607086	0.595604	0.658236	0.657382	0.51532	-0.00291679	0.675887	-0.00405557	0.707108	0.710715	0.537052	0.147306	0.513897	0.683289	0.67361	0.507823	0.672945	0.73387	0.521868	0.641534	0.752849	0.707583	0.841009	0.479544	0.290982	0.00125871	0.0183403	0.454775	0.66431	0.642388	0.162965	0.00904033	0.653112	0.634132	0.673325	0.587632	0.676362	0.00277707	0.692115	0.443293	0.432854
cg00474004	0.828071	0.737668	0.775388	0.925909	0.623417	0.543079	0.552691	0.789443	0.936881	0.543895	0.644635	0.312039	0.268787	0.897528	0.25038	0.568649	0.27459	0.451588	0.65062	0.444425	0.588689	0.856724	0.401717	0.383854	0.749183	0.785816	0.667394	0.686618	0.93144	0.487133	0.518778	0.546434	0.700854	0.248657	0.938694	0.692421	0.620153	0.407339	0.27314	0.301702	0.390564	0.907593	0.71509	0.901608	0.350757	0.758523	0.725608	0.242673	0.44642
cg00474209	0.0516342	0.0543332	0.0573022	0.0480354	0.075386	0.0502846	0.0490251	0.0650395	0.06378	0.0630602	0.571294	0.0468658	0.0417376	0.049205	0.0420975	0.0789847	0.0507345	0.0573022	0.0454263	0.0474956	0.0420975	0.0518141	0.0544232	0.057842	0.0560427	0.080964	0.052174	0.0475856	0.0517241	0.0393084	0.0402981	0.0512743	0.0362495	0.0630602	0.0617107	0.0496549	0.0542433	0.0517241	0.0552329	0.0555928	0.0465959	0.0519041	0.0461461	0.0815038	0.0437169	0.0582919	0.0633301	0.0353498	0.136115
cg00475955	0.0182988	0.0168529	0.0174955	0.0194234	0.0208692	0.0199053	0.0160497	0.015889	0.0146038	0.0179775	0.0139612	0.0146038	0.0171742	0.0176562	0.0152464	0.0171742	0.012676	0.0182988	0.015889	0.0171742	0.0123547	0.016371	0.0131579	0.0166923	0.0147645	0.0218331	0.0147645	0.0147645	0.0165316	0.0129973	0.0157284	0.0120334	0.0173349	0.015889	0.0154071	0.0171742	0.0157284	0.0142825	0.0141218	0.0170136	0.0236003	0.015889	0.0157284	0.0141218	0.0221544	0.0147645	0.0186201	0.0125153	0.0147645
cg00476580	0.0428737	0.0352878	0.0413385	0.0396226	0.0389001	0.0438671	0.0364618	0.0374552	0.0358297	0.0391711	0.0377261	0.0367327	0.0372746	0.037094	0.0342041	0.0373649	0.0398935	0.0372746	0.0341138	0.0383583	0.0339332	0.0386292	0.0364618	0.0366424	0.0373649	0.0396226	0.0385389	0.0365521	0.0364618	0.0350169	0.0349266	0.0381777	0.0338429	0.0345653	0.0376358	0.0384486	0.0398032	0.0413385	0.034475	0.0381777	0.0435059	0.0403451	0.0433252	0.0384486	0.0387195	0.0362812	0.0393517	0.0343847	0.0374552
cg00479269	0.0339819	0.0370157	0.0391646	0.0299369	0.0429568	0.0363837	0.035246	0.0377741	0.0391646	0.0472546	0.0361308	0.0248807	0.0308218	0.0385326	0.0354988	0.0299369	0.0301897	0.0413135	0.0279144	0.0396702	0.0291785	0.0464962	0.0319594	0.0293049	0.0349932	0.0544598	0.0366365	0.0314538	0.027788	0.0304426	0.0353724	0.0252599	0.0272824	0.0387854	0.030569	0.0315802	0.0341083	0.0360044	0.0304426	0.0368893	0.0482659	0.0382798	0.0377741	0.0349932	0.0382798	0.035246	0.0430832	0.0189396	0.0396702
cg00480115	0.33806	0.168081	0.23985	0.135419	0.700348	0.199411	0.256626	0.213187	0.355947	0.446825	0.214853	0.321618	0.246405	0.224852	0.216742	0.367723	0.280956	0.181191	0.314508	0.301176	0.14975	0.216187	0.315508	0.156416	0.183746	0.266736	0.5517	0.368168	0.174525	0.335172	0.114644	0.443269	0.764007	0.137419	0.329839	0.513483	0.203744	0.378055	0.250293	0.192634	0.135308	0.334616	0.318507	0.479487	0.388498	0.296399	0.246294	0.192634	0.431271
cg00480209	0.0473023	0.0495986	0.0309413	0.036682	0.0435709	0.0375431	0.0384042	0.0263488	0.0320895	0.0329506	0.0263488	0.0312284	0.0269229	0.0315154	0.0306543	0.0332376	0.0326636	0.0352469	0.0375431	0.0429968	0.0274969	0.0338117	0.0315154	0.0392654	0.0375431	0.0404135	0.0326636	0.0263488	0.0369691	0.0263488	0.0398394	0.0272099	0.0266358	0.0315154	0.0352469	0.045006	0.0346728	0.0358209	0.0309413	0.0332376	0.0415616	0.0395524	0.0349598	0.0358209	0.0340987	0.0418487	0.0332376	0.0231914	0.0475894
cg00480356	0.096673	0.0399881	0.0918586	0.173314	0.0946541	0.153979	0.085103	0.0637491	0.0792793	0.075785	0.0397551	0.0393669	0.0316018	0.0797452	0.0516357	0.105991	0.111737	0.115076	0.0403763	0.0924022	0.0323007	0.0993908	0.0569935	0.0728343	0.088675	0.113213	0.0745426	0.0367267	0.108476	0.0530334	0.05777	0.0528004	0.0343972	0.131305	0.077338	0.0821523	0.106612	0.0744649	0.0637491	0.124239	0.147689	0.125792	0.128587	0.0571488	0.0527228	0.0612643	0.0707377	0.0230602	0.0792016
cg00483154	0.0294459	0.028122	0.0227058	0.0225855	0.0269184	0.0231873	0.0277609	0.0289645	0.0292052	0.0227058	0.0181322	0.020058	0.0229466	0.0223448	0.0189747	0.0263166	0.0253537	0.0240298	0.0225855	0.023428	0.0223448	0.0383524	0.025113	0.0286034	0.0221041	0.0221041	0.0163269	0.0196969	0.0237891	0.0181322	0.021743	0.0205394	0.0224651	0.0259555	0.0499067	0.0282423	0.0230669	0.0349824	0.0282423	0.0326956	0.0269184	0.0233076	0.0221041	0.0224651	0.0254741	0.0292052	0.042926	0.0154844	0.0239094
cg00485296	0.314843	0.0219191	0.020366	0.0202107	0.0640871	0.0187352	0.0192011	0.0185022	0.0193565	0.0187352	0.0175703	0.0188129	0.0183469	0.0192788	0.0182693	0.0190458	0.0195894	0.0202107	0.0186575	0.0188905	0.0175703	0.0180363	0.0193565	0.0196671	0.0198224	0.0208319	0.0186575	0.0178033	0.0199001	0.0173374	0.017881	0.0181916	0.0180363	0.0185022	0.0195894	0.0194341	0.0198224	0.0185799	0.0179586	0.0199001	0.0195118	0.0197447	0.0191235	0.0183469	0.0218415	0.0185799	0.0188129	0.0173374	0.0264233
cg00485380	0.0248469	0.0227678	0.0327473	0.0258864	0.0369054	0.0298366	0.0314999	0.0317078	0.0263022	0.035658	0.0273418	0.0273418	0.0242232	0.0265101	0.0200651	0.0206888	0.0271339	0.0229758	0.0231837	0.0342026	0.0215204	0.029005	0.0285892	0.0344105	0.0217283	0.0344105	0.0287971	0.0238074	0.0302524	0.0165307	0.0271339	0.0265101	0.0175702	0.0265101	0.026926	0.0267181	0.0265101	0.0229758	0.0229758	0.0235995	0.0267181	0.0285892	0.0441821	0.0296287	0.0298366	0.0208967	0.0308762	0.0111251	0.0358659
cg00487159	0.0408065	0.0423432	0.0387209	0.0389404	0.167149	0.0381721	0.0433311	0.0386111	0.0375135	0.034879	0.0507953	0.0365255	0.0355376	0.0378428	0.0385014	0.0691265	0.0388307	0.0432214	0.03916	0.0393795	0.0398186	0.0431116	0.0385014	0.0394893	0.0416846	0.0354279	0.0626502	0.0514539	0.04388	0.0335618	0.0350986	0.0421237	0.0374037	0.0390502	0.0417944	0.0401479	0.0383916	0.0388307	0.0470632	0.0393795	0.0447581	0.0496976	0.0397088	0.0371842	0.0475023	0.0382818	0.0394893	0.0358669	0.0387209
cg00488364	0.705334	0.899585	0.779362	0.930883	0.74441	0.942315	0.927603	0.810284	0.791075	0.868756	0.922356	0.954684	0.876253	0.955246	0.964617	0.861447	0.929196	0.63796	0.895744	0.950186	0.936224	0.640303	0.889278	0.590546	0.69081	0.833804	0.612847	0.755467	0.917108	0.919545	0.862291	0.9083	0.654171	0.951311	0.777956	0.544255	0.918514	0.817312	0.585485	0.838583	0.62353	0.691372	0.765587	0.807473	0.896587	0.872786	0.895837	0.968459	0.629152
cg00488718	0.0322046	0.0378448	0.0488901	0.0265644	0.0333796	0.0413699	0.0258594	0.0286795	0.0239793	0.0345547	0.0204542	0.0251544	0.0206892	0.0326746	0.0181041	0.0310296	0.0303245	0.0329096	0.0213943	0.0376098	0.0242143	0.0399599	0.0357297	0.0380798	0.04466	0.0394898	0.0296195	0.0225693	0.0319696	0.0204542	0.045365	0.0242143	0.0220993	0.0331446	0.0303245	0.0305595	0.0345547	0.0296195	0.0183392	0.0394898	0.0397248	0.0331446	0.0338497	0.0345547	0.0361997	0.0244493	0.0296195	0.0251544	0.0338497
cg00489401	0.598747	0.831832	0.735918	0.881435	0.644	0.858396	0.805973	0.828423	0.719815	0.736153	0.774472	0.759426	0.794454	0.826543	0.791398	0.748612	0.761659	0.648467	0.760131	0.691252	0.719462	0.783992	0.755077	0.832302	0.802799	0.841588	0.777763	0.760367	0.862745	0.788224	0.913053	0.715818	0.528339	0.618141	0.633069	0.578177	0.744498	0.701125	0.812438	0.823251	0.810557	0.71429	0.785873	0.732627	0.773179	0.697011	0.78411	0.848405	0.674914
cg00491404	0.46037	0.237373	0.320265	0.178311	0.494471	0.314821	0.204401	0.250931	0.315437	0.300646	0.299105	0.316053	0.311226	0.198033	0.268804	0.427706	0.348512	0.223403	0.362276	0.3405	0.244666	0.305474	0.324784	0.221657	0.322422	0.347895	0.47968	0.373266	0.191459	0.299311	0.143388	0.423905	0.696617	0.236243	0.47701	0.472798	0.24179	0.405211	0.304549	0.188069	0.251137	0.334645	0.290374	0.362584	0.347279	0.393501	0.326839	0.223609	0.411374
cg00491839	0.0941945	0.0681173	0.0746366	0.0846484	0.0638099	0.0815051	0.0735888	0.0533324	0.0576398	0.0589204	0.0525175	0.0758007	0.0487921	0.0785947	0.059386	0.0742873	0.0780127	0.0824365	0.07615	0.0805738	0.0599681	0.0717262	0.0629949	0.0926811	0.073356	0.0711441	0.0710277	0.0568249	0.0818544	0.0549622	0.0564756	0.0645084	0.0613651	0.0738217	0.0777798	0.0746366	0.0836006	0.0816216	0.0643919	0.0801082	0.0799917	0.0794097	0.0794097	0.0661382	0.0681173	0.0753351	0.0697471	0.0600845	0.0619472
cg00493400	0.0294101	0.0313552	0.0305771	0.0272705	0.0319387	0.0344673	0.028243	0.0297991	0.027076	0.0375794	0.0216298	0.0247419	0.0264925	0.0309661	0.0241584	0.0233804	0.027076	0.0319387	0.0264925	0.0333002	0.0210463	0.0227968	0.0243529	0.0299936	0.0235749	0.0313552	0.0325222	0.0253254	0.027076	0.0224078	0.0229913	0.0208518	0.0226023	0.0290211	0.0272705	0.0272705	0.0288266	0.0319387	0.0241584	0.027854	0.0385519	0.0233804	0.0338837	0.026687	0.0327167	0.0247419	0.0249364	0.0173506	0.026298
cg00495415	0.0287378	0.0270635	0.0251249	0.0242437	0.0247724	0.0283853	0.0253892	0.03473	0.0246843	0.0329676	0.0189564	0.0204545	0.0192208	0.0277685	0.0188683	0.0319102	0.0288259	0.0282972	0.024508	0.0295309	0.0186921	0.043454	0.0258298	0.0294428	0.0244199	0.0251249	0.0294428	0.0192208	0.028121	0.0198376	0.0199258	0.0226575	0.0180752	0.0260942	0.0390479	0.0266229	0.0258298	0.0297072	0.0210713	0.0283853	0.0215119	0.0228337	0.0248605	0.0299715	0.0202783	0.0253011	0.0359637	0.0165772	0.0229219
cg00495442	0.0531129	0.0613157	0.0600729	0.0454072	0.0931328	0.0488872	0.0618129	0.0747386	0.0764786	0.0682757	0.0441643	0.0416786	0.0473957	0.03621	0.0409329	0.06927	0.05187	0.0444129	0.0478929	0.0464015	0.0498815	0.0687729	0.0737443	0.06057	0.0523672	0.0948728	0.0697671	0.0580843	0.0533615	0.0546043	0.04665	0.0406843	0.0521186	0.0580843	0.0685243	0.0662872	0.0473957	0.0856757	0.0638014	0.0498815	0.0618129	0.0687729	0.0436672	0.08145	0.0488872	0.05013	0.07797	0.0282558	0.0655414
cg00496170	0.0333285	0.0362595	0.0369923	0.0343055	0.0281992	0.0306417	0.0399233	0.0277107	0.0267337	0.0277107	0.0391906	0.0247796	0.0262451	0.0335727	0.0238026	0.0311302	0.0289319	0.0355268	0.0225813	0.0267337	0.0257566	0.0301532	0.0225813	0.0274664	0.0291762	0.030886	0.0279549	0.0198946	0.030886	0.0186733	0.0286877	0.0233141	0.0252681	0.0252681	0.0306417	0.0257566	0.0279549	0.0240469	0.03284	0.0311302	0.0277107	0.0286877	0.0352825	0.0255124	0.0284434	0.0274664	0.0272222	0.0169635	0.0289319
cg00497084	0.781161	0.885394	0.734764	0.972193	0.898953	0.669734	0.959648	0.950055	0.948025	0.934835	0.974591	0.854493	0.590037	0.92063	0.547514	0.936403	0.824607	0.951438	0.910022	0.91242	0.961954	0.863256	0.946365	0.370503	0.830141	0.936772	0.696115	0.638464	0.900244	0.91611	0.865654	0.946457	0.947195	0.967119	0.814091	0.708936	0.94738	0.891666	0.672132	0.362571	0.823039	0.664199	0.641785	0.456657	0.90541	0.67656	0.901536	0.926256	0.800071
cg00497251	0.0848669	0.061632	0.0858717	0.0615064	0.0770801	0.074317	0.074945	0.0648974	0.0765777	0.0750706	0.0583665	0.0646462	0.0631391	0.0691676	0.0599992	0.0765777	0.0792152	0.0726843	0.0643951	0.0716795	0.0664046	0.0687909	0.0715539	0.0734378	0.0721819	0.0638927	0.0643951	0.0799688	0.0866253	0.0607528	0.0571106	0.0681629	0.0764521	0.0832342	0.0921514	0.0764521	0.070926	0.0694188	0.0660278	0.0759497	0.0753218	0.0782104	0.0751962	0.074317	0.0754474	0.0862485	0.101948	0.0596225	0.11187
cg00498305	0.402261	0.136274	0.573532	0.259582	0.510575	0.451435	0.254087	0.586664	0.786061	0.289477	0.363239	0.512437	0.261724	0.116064	0.476674	0.164121	0.39062	0.21376	0.266846	0.327755	0.260047	0.274949	0.404496	0.0742474	0.35346	0.496605	0.229127	0.553416	0.42899	0.338838	0.114946	0.406825	0.208917	0.462704	0.252131	0.28836	0.306428	0.245239	0.268336	0.167473	0.453764	0.551087	0.473508	0.243935	0.380282	0.165983	0.709599	0.300653	0.195972
cg00498604	0.102224	0.884153	0.712732	0.0779895	0.578108	0.490369	0.0929258	0.850324	0.871986	0.518758	0.833014	0.168003	0.0865952	0.103708	0.0795722	0.102224	0.76308	0.100839	0.814022	0.689289	0.0775939	0.475235	0.753782	0.107862	0.110236	0.901958	0.694531	0.814417	0.370582	0.0919367	0.755365	0.307573	0.0933215	0.08798	0.0958933	0.511735	0.744385	0.782468	0.581669	0.445561	0.676133	0.792953	0.10262	0.742802	0.76308	0.0872876	0.897704	0.076308	0.107664
cg00499599	0.0459155	0.0477944	0.187383	0.0475733	0.0454734	0.0494522	0.0442577	0.0411631	0.0465786	0.0425999	0.0386211	0.0416052	0.0391737	0.0448103	0.0416052	0.0419367	0.043484	0.0503364	0.040721	0.048347	0.0400579	0.0441472	0.0414946	0.0477944	0.0424893	0.0477944	0.0439261	0.0428209	0.0406105	0.0444787	0.045805	0.0477944	0.0399473	0.0429314	0.0423788	0.0446998	0.0461366	0.0462471	0.0401684	0.0445893	0.0469102	0.043484	0.0445893	0.0420473	0.0462471	0.0472418	0.0438156	0.0399473	0.0428209
cg00499822	0.541259	0.706248	0.657028	0.670051	0.57561	0.813712	0.598887	0.849499	0.767261	0.402623	0.798331	0.731371	0.753213	0.671384	0.659489	0.681946	0.732909	0.258962	0.70307	0.628522	0.766235	0.711581	0.670461	0.69825	0.72122	0.818224	0.49491	0.760903	0.80756	0.728603	0.909076	0.671179	0.430309	0.45133	0.587505	0.56105	0.698353	0.61714	0.690867	0.684715	0.756596	0.674871	0.48117	0.579507	0.477991	0.359145	0.76521	0.864573	0.664822
cg00500400	0.0678231	0.0675428	0.0560525	0.0411992	0.0779121	0.0594155	0.0515685	0.0414794	0.0723071	0.0526895	0.048766	0.0381164	0.0445622	0.0484857	0.0451227	0.0596958	0.0616575	0.055492	0.0451227	0.0535302	0.0465239	0.0552117	0.0493265	0.056613	0.0571735	0.0482054	0.0524092	0.0582945	0.0627785	0.0389571	0.0456832	0.0571735	0.0465239	0.0759504	0.0644601	0.112103	0.0440017	0.0476449	0.059976	0.0459634	0.0667021	0.0672626	0.0582945	0.052129	0.0549315	0.0454029	0.0627785	0.0434412	0.0560525
cg00502442	0.0203084	0.0150618	0.0182991	0.0162897	0.0191921	0.0189689	0.016513	0.0185223	0.0177409	0.0236574	0.0139454	0.0179642	0.0142803	0.0166246	0.0140571	0.0226527	0.0209782	0.0229876	0.0169595	0.0162897	0.0120477	0.0213131	0.017406	0.0219829	0.0177409	0.0151734	0.0164013	0.0133873	0.0190805	0.0116012	0.0134989	0.0168479	0.0141687	0.0206433	0.0249969	0.0222062	0.0193037	0.0228759	0.0168479	0.0194154	0.0177409	0.0204201	0.0188572	0.0187456	0.016513	0.0179642	0.0178525	0.00881042	0.0166246
cg00503458	0.0616287	0.0670015	0.0754847	0.0649278	0.0869843	0.0714316	0.0719029	0.0670957	0.0652105	0.134114	0.059555	0.0512602	0.0428712	0.0635139	0.0526741	0.0634196	0.0573871	0.0651163	0.0530512	0.0637024	0.0391009	0.123368	0.0640794	0.0575756	0.0719029	0.0690751	0.0984839	0.0551249	0.0628541	0.0496579	0.0471129	0.0558789	0.0448507	0.0536167	0.0683211	0.0626656	0.0639852	0.0738823	0.0526741	0.0425884	0.0746364	0.0613459	0.0584239	0.0793493	0.0794436	0.0763331	0.0719972	0.0317487	0.0778412
cg00503840	0.566211	0.682577	0.666656	0.572812	0.526473	0.751309	0.746002	0.750533	0.639215	0.562716	0.54796	0.643486	0.688402	0.759852	0.763088	0.638179	0.631966	0.747556	0.721668	0.631837	0.786128	0.710795	0.73487	0.784705	0.641156	0.794542	0.585886	0.656171	0.777456	0.698498	0.860038	0.605302	0.48803	0.815252	0.594688	0.435477	0.685425	0.652806	0.768654	0.75338	0.777585	0.629377	0.622776	0.61501	0.680118	0.67727	0.759076	0.807227	0.609573
cg00504595	0.185947	0.17704	0.127037	0.0990456	0.35975	0.13149	0.13658	0.16419	0.174878	0.166353	0.152611	0.153629	0.13289	0.116222	0.136707	0.199688	0.150448	0.124874	0.148158	0.125638	0.0901391	0.195362	0.191164	0.158083	0.124493	0.131872	0.214448	0.208849	0.108079	0.129836	0.0994273	0.18951	0.358986	0.100063	0.19867	0.213048	0.121184	0.210758	0.134799	0.108334	0.139252	0.142814	0.156683	0.163808	0.156174	0.123347	0.179458	0.0977732	0.197653
cg00509616	0.114336	0.086721	0.111781	0.0731593	0.205631	0.0700146	0.0919294	0.0877037	0.145292	0.174872	0.0853451	0.0946811	0.0935018	0.0735524	0.0821021	0.122001	0.108341	0.0747317	0.0787609	0.143719	0.066575	0.0767954	0.121116	0.0666733	0.0787609	0.0822987	0.0854434	0.111781	0.070506	0.122689	0.0649044	0.118856	0.156298	0.0750265	0.0937966	0.13114	0.121116	0.129764	0.0765989	0.0935018	0.104803	0.124359	0.10726	0.181358	0.103526	0.0907502	0.187942	0.0664768	0.127406
cg00510787	0.120755	0.127056	0.136029	0.132783	0.143284	0.160085	0.129919	0.127056	0.129156	0.131447	0.159513	0.118655	0.112164	0.53124	0.119228	0.153021	0.123237	0.135838	0.1177	0.118082	0.106436	0.141375	0.120564	0.120755	0.130683	0.314733	0.266239	0.122092	0.124192	0.161613	0.114646	0.111209	0.117891	0.122283	0.159131	0.123046	0.13011	0.120946	0.122283	0.120755	0.133356	0.12381	0.116746	0.128392	0.131256	0.131638	0.145002	0.108154	0.133738
cg00510956	0.94034	0.962989	0.932455	0.69005	0.943135	0.956036	0.830677	0.949729	0.97116	0.936039	0.956825	0.931523	0.947865	0.921561	0.505989	0.909806	0.927581	0.883071	0.902352	0.937114	0.666828	0.92665	0.948725	0.957972	0.962344	0.94636	0.949156	0.966573	0.89841	0.944497	0.947722	0.934104	0.858057	0.892246	0.940985	0.961054	0.805375	0.960193	0.932025	0.702665	0.960122	0.953958	0.816628	0.948367	0.953169	0.927796	0.948582	0.924714	0.956753
cg00511475	0.283085	0.604039	0.248419	0.171504	0.356553	0.463899	0.270085	0.63319	0.665492	0.276093	0.772346	0.411211	0.379992	0.200951	0.172391	0.292047	0.415248	0.231086	0.331144	0.392302	0.169732	0.517867	0.244775	0.2172	0.353992	0.713847	0.455922	0.697499	0.632402	0.225768	0.546624	0.46577	0.337349	0.119407	0.316569	0.451982	0.269691	0.301698	0.220253	0.349758	0.525943	0.333114	0.558737	0.372704	0.390628	0.257381	0.672288	0.367189	0.334493
cg00512279	0.435619	0.72226	0.406946	0.372695	0.458888	0.707182	0.273256	0.702128	0.621425	0.548567	0.597284	0.605738	0.632145	0.1027	0.633714	0.426293	0.620728	0.323281	0.638681	0.559897	0.449301	0.64208	0.623081	0.708577	0.611316	0.734374	0.674675	0.601991	0.677987	0.282494	0.768711	0.509087	0.384897	0.103833	0.133726	0.33461	0.110805	0.627352	0.616022	0.101829	0.576455	0.61027	0.369819	0.518587	0.608876	0.230203	0.715462	0.718599	0.519023
cg00512374	0.0409996	0.0286865	0.0554728	0.0327909	0.0446719	0.0381913	0.0865793	0.0526645	0.0409996	0.0537446	0.0289026	0.0293346	0.0278225	0.0243662	0.0198298	0.0364632	0.0807469	0.0429437	0.0334389	0.0256623	0.021774	0.0390554	0.034303	0.0349511	0.07081	0.107101	0.0593611	0.0237181	0.0435918	0.021774	0.022206	0.0323589	0.0256623	0.0381913	0.0366792	0.0425117	0.046184	0.0362472	0.0429437	0.0358151	0.0358151	0.0418636	0.0312788	0.0500723	0.0325749	0.0470481	0.0381913	0.0152934	0.0526645
cg00513467	0.0663732	0.084357	0.0516172	0.0451615	0.0696011	0.0511561	0.0442393	0.0672954	0.0368613	0.0622231	0.0382446	0.0382446	0.0474671	0.0783624	0.0368613	0.03225	0.0483894	0.0885071	0.0511561	0.0746734	0.0350168	0.0723678	0.0423948	0.0525395	0.0382446	0.0631453	0.0603786	0.0640676	0.0423948	0.035939	0.0866626	0.0520784	0.0659121	0.0456226	0.039628	0.043317	0.0686788	0.0456226	0.0451615	0.0364002	0.0875849	0.0423948	0.0709844	0.0534617	0.0603786	0.0520784	0.0497727	0.0539228	0.0576118
cg00514407	0.108389	0.0878517	0.093732	0.0817082	0.478932	0.0977691	0.0853065	0.0938197	0.0972426	0.0950484	0.0760034	0.0939952	0.0930298	0.0819715	0.0847799	0.0894315	0.0969793	0.089607	0.126117	0.0817959	0.0757401	0.0921522	0.126293	0.0998755	0.0861842	0.613212	0.10286	0.481828	0.0901336	0.0827613	0.103562	0.40793	0.0867985	0.0882028	0.0963649	0.267945	0.096716	0.157362	0.0916256	0.0892559	0.106633	0.333242	0.0782853	0.0856576	0.0918011	0.095224	0.372561	0.0837268	0.0910112
cg00514895	0.0630952	0.724404	0.0351864	0.0339842	0.0404247	0.0226489	0.0409399	0.0594885	0.688337	0.429086	0.668329	0.166057	0.120458	0.0332113	0.607359	0.42402	0.0445466	0.019901	0.406158	0.0279731	0.0146627	0.463092	0.380654	0.018527	0.0399094	0.719338	0.0211032	0.659312	0.567514	0.0846493	0.768371	0.102854	0.0275437	0.0181835	0.196714	0.480696	0.407876	0.295983	0.677088	0.102854	0.358327	0.646775	0.0234218	0.0709096	0.19096	0.0240229	0.711094	0.0138899	0.0335548
cg00515905	0.53563	0.274429	0.346672	0.22223	0.588559	0.347402	0.326314	0.293742	0.448772	0.472574	0.286852	0.438854	0.335919	0.294682	0.301468	0.49502	0.430085	0.307523	0.438854	0.401062	0.300319	0.336441	0.413903	0.279127	0.423612	0.398557	0.539493	0.461091	0.286121	0.406178	0.153641	0.509113	0.782947	0.28894	0.563504	0.583131	0.340721	0.514438	0.347611	0.309089	0.313891	0.433321	0.393755	0.510679	0.513707	0.445536	0.33738	0.299902	0.499613
cg00516481	0.450647	0.242023	0.674101	0.382228	0.692752	0.231105	0.34638	0.25931	0.661909	0.395875	0.651537	0.376496	0.45838	0.39078	0.232561	0.331186	0.308258	0.44819	0.171511	0.491134	0.527982	0.212999	0.304255	0.349474	0.365396	0.228012	0.245844	0.784645	0.418985	0.709948	0.320814	0.525617	0.191072	0.506692	0.379316	0.548999	0.305893	0.194985	0.224372	0.285422	0.606045	0.727053	0.527345	0.438455	0.321451	0.264041	0.787647	0.583846	0.485038
cg00518989	0.0333761	0.038071	0.0338978	0.0304201	0.0599804	0.0476346	0.127621	0.0457219	0.0361583	0.030594	0.0278119	0.0295507	0.0224214	0.0298985	0.0206826	0.0352889	0.0271163	0.0344195	0.0267685	0.0377232	0.023117	0.0533728	0.0373755	0.0375494	0.0450264	0.042592	0.0523295	0.020161	0.0378971	0.0147705	0.0213781	0.0286813	0.0179005	0.0485041	0.0651969	0.0373755	0.0241603	0.0332023	0.0234648	0.042592	0.0271163	0.0349411	0.0285074	0.0326806	0.0250297	0.0338978	0.0420704	0.0109451	0.044157
cg00519208	0.389063	0.260503	0.941533	0.339264	0.537025	0.314603	0.28134	0.307626	0.363064	0.623528	0.291568	0.30017	0.474514	0.546106	0.281054	0.398717	0.395753	0.579082	0.300839	0.38046	0.337352	0.350543	0.294244	0.290803	0.482543	0.280289	0.474323	0.446604	0.298832	1.01293	0.323684	0.948129	0.734691	0.378548	0.44278	0.589118	0.362395	0.348057	0.383901	0.30428	0.343183	0.724368	0.326551	0.568472	0.392886	0.429781	0.480822	0.808482	0.423186
cg00519627	0.0159931	0.0169316	0.0137644	0.0147028	0.0174008	0.0165796	0.0159931	0.0138817	0.0134125	0.0137644	0.0121221	0.0123567	0.0136471	0.016345	0.0131778	0.0125913	0.0141163	0.0172835	0.0134125	0.0183392	0.0108318	0.0130605	0.0155239	0.015172	0.0135298	0.021741	0.0149374	0.011301	0.0169316	0.0105972	0.0115356	0.0123567	0.0132952	0.0143509	0.0129432	0.0154066	0.0135298	0.0169316	0.0127086	0.0200987	0.0159931	0.0162277	0.0157585	0.0130605	0.0117702	0.0135298	0.0249082	0.00977605	0.0142336
cg00520135	0.697912	0.869278	0.709659	0.769561	0.788123	0.610301	0.282455	0.869906	0.791621	0.647067	0.767588	0.722662	0.856993	0.759966	0.450861	0.79727	0.426829	0.685447	0.563133	0.736113	0.681591	0.74517	0.406473	0.839596	0.831167	0.730822	0.66545	0.886405	0.404949	0.868471	0.311061	0.776197	0.746963	0.624918	0.800767	0.721227	0.725621	0.674059	0.864346	0.691904	0.717909	0.813411	0.823096	0.581516	0.424766	0.801754	0.810452	0.842286	0.577929
cg00520708	0.0970716	0.0937713	0.132055	0.0877207	0.126774	0.0893708	0.109173	0.130955	0.0945413	0.147346	0.0750695	0.0615382	0.0625283	0.070119	0.0970716	0.120284	0.116763	0.106752	0.0634084	0.111373	0.0649485	0.134805	0.104442	0.112033	0.154057	0.0778197	0.115223	0.129195	0.0772697	0.0954214	0.0986117	0.0755095	0.105872	0.0976216	0.0888208	0.118854	0.118524	0.0939913	0.0759496	0.0656086	0.0983917	0.107303	0.100922	0.172759	0.0789198	0.132165	0.115883	0.0450366	0.146906
cg00521434	0.929609	0.564612	0.925558	0.941763	0.916534	0.929517	0.916902	0.930438	0.934213	0.915889	0.932371	0.810829	0.937988	0.93274	0.927399	0.927399	0.920033	0.936239	0.917178	0.906405	0.930438	0.92077	0.899776	0.925373	0.915981	0.936883	0.803739	0.924453	0.935134	0.93099	0.926386	0.93495	0.850606	0.904472	0.930069	0.923992	0.936791	0.744625	0.934305	0.941211	0.936699	0.932463	0.922703	0.896277	0.89508	0.916626	0.939093	0.952628	0.583488
cg00521598	0.0421417	0.057773	0.0496021	0.0425858	0.0664768	0.0558191	0.0467601	0.0583059	0.0536876	0.0723385	0.0465824	0.0416088	0.0313064	0.0455167	0.0336155	0.0717168	0.0427634	0.0531547	0.0395661	0.0357471	0.0328162	0.08122	0.0479146	0.0476482	0.0581283	0.0618585	0.0681643	0.0354806	0.0461384	0.0364576	0.0419641	0.0393885	0.0352142	0.0736708	0.0640788	0.042941	0.0591052	0.0533323	0.0380563	0.0358359	0.0519113	0.0443621	0.0423193	0.0448061	0.0416976	0.0455167	0.0531547	0.0291748	0.0541316
cg00522034	0.0149032	0.0137867	0.0154615	0.0150893	0.0147171	0.0182528	0.0132284	0.0108093	0.0111815	0.0121119	0.0104371	0.0130423	0.0109954	0.0113676	0.0091345	0.0111815	0.0136006	0.0128562	0.0113676	0.0137867	0.0119258	0.00950668	0.0134145	0.0143449	0.014531	0.0158336	0.0124841	0.00950668	0.0130423	0.0121119	0.0113676	0.014531	0.0108093	0.0128562	0.0124841	0.0149032	0.0158336	0.0124841	0.0104371	0.0121119	0.0141589	0.0134145	0.0136006	0.0126702	0.0150893	0.0149032	0.0152754	0.0108093	0.014531
cg00522316	0.0611623	0.0465266	0.052531	0.0390211	0.0664162	0.0307651	0.0510299	0.0739217	0.0495288	0.0667915	0.0146283	0.044275	0.0221338	0.0326415	0.0258865	0.0705442	0.0397717	0.0709195	0.0423986	0.0532816	0.0217585	0.103568	0.0405222	0.0649151	0.0596612	0.0322662	0.0348931	0.0198821	0.0506547	0.0168799	0.0165047	0.0408975	0.0123766	0.0499041	0.100566	0.056659	0.0645398	0.0671667	0.0300146	0.0544074	0.0213832	0.059286	0.0311404	0.0412728	0.0408975	0.0570343	0.0570343	0.00299478	0.0517805
cg00524288	0.0477897	0.0307465	0.0445188	0.0681039	0.0474454	0.0510606	0.0483062	0.0281642	0.0333288	0.0298857	0.0288528	0.0319516	0.0273034	0.0398706	0.0297136	0.034706	0.0434859	0.0407314	0.0341896	0.0520936	0.0283363	0.0464125	0.0383213	0.0445188	0.0352225	0.0498556	0.0295414	0.0355668	0.0434859	0.0293693	0.0312629	0.0341896	0.0283363	0.0446909	0.036944	0.0396985	0.0434859	0.0429694	0.0333288	0.0501999	0.0452074	0.0440023	0.0431416	0.0360833	0.0298857	0.0360833	0.0329845	0.0255819	0.0403871
cg00528052	0.0342169	0.0260491	0.0292162	0.0268826	0.0358838	0.0365505	0.0317166	0.0383841	0.0318832	0.0305497	0.0208817	0.0302163	0.0232154	0.0297163	0.0205483	0.044885	0.0333834	0.029883	0.0263825	0.0258824	0.0213818	0.0403844	0.0302163	0.0370506	0.0270492	0.0257157	0.0283828	0.0213818	0.0310498	0.0185481	0.020715	0.0257157	0.0210484	0.0278827	0.0420513	0.03255	0.0328834	0.0372173	0.0232154	0.0323833	0.0318832	0.0348837	0.0372173	0.03255	0.0267159	0.0348837	0.0458852	0.0175479	0.0300497
cg00528967	0.0171244	0.0150841	0.0173285	0.0222254	0.0176345	0.0186547	0.0164103	0.0117174	0.0138598	0.0150841	0.0140639	0.014574	0.014982	0.0162063	0.0144719	0.0432415	0.0164103	0.0173285	0.0140639	0.0169204	0.0135538	0.0180426	0.0161042	0.0207972	0.0136558	0.0137578	0.0171244	0.0133497	0.0156962	0.0120235	0.0126356	0.0136558	0.0140639	0.0135538	0.0160022	0.0173285	0.0140639	0.0156962	0.0151861	0.0194709	0.0234497	0.0140639	0.0173285	0.0168184	0.0169204	0.0142679	0.0167164	0.0117174	0.0155941
cg00532335	0.586468	0.389372	0.751624	0.807004	0.508273	0.747866	0.765939	0.449493	0.774259	0.631738	0.684166	0.654463	0.484296	0.447078	0.413975	0.407981	0.640864	0.639164	0.55578	0.318066	0.494048	0.344191	0.495837	0.531177	0.701433	0.516057	0.5038	0.512031	0.232804	0.395008	0.431868	0.675845	0.546655	0.627086	0.640685	0.486891	0.438757	0.474723	0.392592	0.417733	0.584231	0.333544	0.766475	0.70358	0.597025	0.493511	0.492617	0.331218	0.384361
cg00532890	0.07059	0.0485952	0.0560879	0.0558462	0.0628555	0.0853337	0.0432778	0.0302259	0.0565713	0.0502871	0.0444863	0.0398939	0.0391688	0.047145	0.0423109	0.0355433	0.0512539	0.0604385	0.0372352	0.064064	0.0263587	0.0621304	0.0510122	0.0469033	0.0401356	0.051979	0.0652726	0.0430361	0.0403773	0.0440029	0.0326429	0.0328846	0.0324012	0.0362684	0.0466616	0.054396	0.0425527	0.065756	0.0379603	0.0664811	0.0732487	0.0512539	0.0505288	0.0517373	0.0768742	0.0493203	0.0531875	0.0188659	0.049562
cg00534274	0.144299	0.0789997	0.0924437	0.0570503	0.175577	0.0772163	0.0928553	0.0655557	0.0859961	0.113021	0.0625376	0.156783	0.115353	0.0813318	0.114119	0.130306	0.0905231	0.0688481	0.154451	0.184768	0.0610286	0.128386	0.0825665	0.0857217	0.134696	0.0865448	0.206718	0.169541	0.0755701	0.113844	0.0655557	0.206443	0.184357	0.0699456	0.159664	0.191216	0.0907975	0.114393	0.0927181	0.0770791	0.0785881	0.113021	0.108906	0.149512	0.0888769	0.130992	0.0942271	0.091895	0.101772
cg00536175	0.922251	0.932265	0.946731	0.939245	0.943494	0.941268	0.724993	0.951991	0.949159	0.872279	0.913551	0.934794	0.912034	0.936615	0.948956	0.932164	0.913855	0.940864	0.816541	0.890892	0.929534	0.907381	0.928927	0.495973	0.938638	0.938942	0.684834	0.93965	0.936919	0.848203	0.939447	0.925994	0.749474	0.937829	0.913248	0.800356	0.819778	0.785688	0.933681	0.658634	0.936919	0.917901	0.94926	0.786194	0.690296	0.910719	0.931153	0.934086	0.610382
cg00537910	0.903211	0.921508	0.888223	0.909926	0.875181	0.898831	0.889683	0.89231	0.919464	0.868952	0.903308	0.910121	0.896787	0.942823	0.852407	0.894744	0.906325	0.930268	0.890072	0.894452	0.87304	0.877322	0.856397	0.912457	0.885498	0.932506	0.929294	0.915571	0.860971	0.883843	0.940779	0.916642	0.890461	0.885303	0.852017	0.914501	0.919659	0.906228	0.902238	0.909926	0.924428	0.933577	0.906423	0.857565	0.903795	0.870899	0.886665	0.889877	0.847832
cg00539322	0.852905	0.759475	0.907823	0.908613	0.843255	0.892646	0.901419	0.874925	0.871855	0.793864	0.893173	0.874399	0.867556	0.921947	0.896155	0.84308	0.893523	0.858257	0.788601	0.880101	0.912385	0.740526	0.896419	0.940458	0.914403	0.901156	0.850975	0.854835	0.815445	0.867907	0.907209	0.870802	0.861152	0.909753	0.863784	0.846238	0.866854	0.890278	0.926685	0.884751	0.833254	0.906156	0.898261	0.875364	0.832377	0.861854	0.861064	0.886242	0.869047
cg00539716	0.0740204	0.060988	0.0548667	0.0659245	0.0592108	0.0615804	0.0622715	0.0640486	0.0720458	0.0432166	0.0469683	0.0626664	0.0471658	0.0553604	0.0420318	0.0774759	0.0732305	0.0754026	0.053682	0.0551629	0.0398597	0.0752051	0.0614816	0.0639499	0.0634562	0.0937664	0.0714534	0.0540769	0.0681953	0.0480543	0.0461785	0.0591121	0.048548	0.0737242	0.0765873	0.0664181	0.0743165	0.0766861	0.068294	0.0723419	0.065727	0.0570388	0.0607905	0.0663194	0.0691826	0.0685902	0.0649372	0.0439077	0.0565451
cg00540544	0.0361386	0.0261898	0.035281	0.0308212	0.0345949	0.0306497	0.0457444	0.0255037	0.0253322	0.0255037	0.0236169	0.026876	0.0249891	0.0299635	0.0239599	0.0311642	0.0313358	0.032365	0.0265329	0.0342518	0.0219016	0.029792	0.0320219	0.0375109	0.0330511	0.0671858	0.0316788	0.0256753	0.0292774	0.0227592	0.0237884	0.222421	0.0244745	0.0289343	0.0303066	0.0292774	0.0388831	0.0311642	0.026876	0.0351095	0.0364817	0.0287628	0.0860542	0.0292774	0.0325365	0.0376824	0.0299635	0.0248176	0.0373394
cg00544557	0.815625	0.536319	0.84519	0.276842	0.551146	0.878149	0.78472	0.852425	0.853318	0.600272	0.884669	0.482637	0.565973	0.411002	0.340885	0.488979	0.532656	0.884044	0.609115	0.651096	0.6243	0.533818	0.515507	0.606882	0.559185	0.87404	0.716389	0.685663	0.897353	0.601701	0.833042	0.816786	0.674766	0.263444	0.82679	0.828844	0.52167	0.650828	0.372058	0.761139	0.65181	0.868949	0.663601	0.611705	0.820091	0.416182	0.737648	0.773822	0.491122
cg00545573	0.0521956	0.0717265	0.0620073	0.0642288	0.0994955	0.0659875	0.0571014	0.0865366	0.073948	0.0647842	0.0481228	0.048493	0.0454384	0.0558056	0.047012	0.0501592	0.0779282	0.0733926	0.0626553	0.0575643	0.0395144	0.065895	0.0677462	0.0589527	0.064414	0.118193	0.106808	0.0518253	0.069505	0.0405326	0.0461789	0.0543245	0.0407177	0.0564535	0.0646917	0.0670983	0.0610817	0.0569163	0.0439574	0.0642288	0.0609891	0.0466418	0.0618222	0.0695975	0.0489559	0.0580271	0.0589527	0.0438649	0.0427541
cg00546491	0.496013	0.703576	0.629031	0.563882	0.485876	0.749316	0.524817	0.728671	0.601587	0.551149	0.615309	0.624086	0.589472	0.431358	0.727311	0.455588	0.633976	0.666736	0.643866	0.537303	0.723479	0.671928	0.640404	0.421468	0.58292	0.72113	0.632245	0.616545	0.741775	0.542866	0.804823	0.613578	0.351003	0.794686	0.609251	0.487854	0.743011	0.639786	0.620625	0.751294	0.768601	0.622479	0.614196	0.565736	0.6655	0.570681	0.658577	0.501329	0.530009
cg00546897	0.329196	0.182781	0.242783	0.170622	0.326904	0.235606	0.314146	0.286239	0.42159	0.326605	0.202018	0.299993	0.251653	0.232517	0.27089	0.302186	0.290226	0.213878	0.274478	0.321422	0.154974	0.27976	0.235108	0.206204	0.254544	0.231719	0.415311	0.33418	0.160555	0.297601	0.0988595	0.365576	0.372852	0.148495	0.363283	0.418501	0.250258	0.31604	0.256138	0.193745	0.251055	0.256537	0.243381	0.325409	0.33408	0.335476	0.201918	0.196038	0.348134
cg00547018	0.0614587	0.159707	0.0864907	0.0768269	0.217891	0.0693777	0.123669	0.221314	0.164338	0.120985	0.122931	0.0532043	0.0644787	0.0847458	0.045084	0.112731	0.0712568	0.0683039	0.0674315	0.0847458	0.0802495	0.0938727	0.0821285	0.100382	0.0814574	0.157627	0.200846	0.422643	0.0846787	0.043876	0.203664	0.10555	0.0556202	0.118301	0.106624	0.0759544	0.0676999	0.0852827	0.0682368	0.0733372	0.0890408	0.0821956	0.0750149	0.0775651	0.0874302	0.0717265	0.0803166	0.0659551	0.127897
cg00547789	0.601478	0.0449644	0.371344	0.357527	0.548114	0.785299	0.040295	0.0395326	0.68991	0.0477279	0.603289	0.718403	0.378396	0.0389609	0.507614	0.0442973	0.710589	0.369343	0.410129	0.0487761	0.857817	0.0505867	0.0463938	0.843905	0.413845	0.730886	0.455107	0.616058	0.792065	0.0424867	0.897936	0.0536361	0.0415338	0.0398185	0.254896	0.462826	0.0387703	0.459967	0.523623	0.0429632	0.648934	0.726027	0.0949934	0.0477279	0.614247	0.0440114	0.767384	0.0388656	0.319028
cg00547829	0.0396523	0.0858863	0.0371583	0.0431054	0.0534649	0.0434891	0.0467504	0.0390767	0.0337051	0.0434891	0.0300601	0.0289091	0.0408033	0.0363909	0.0404196	0.0377338	0.0580691	0.0471341	0.0308275	0.044832	0.0252641	0.0555752	0.0379257	0.0528894	0.0342807	0.061906	0.0404196	0.0323622	0.0402278	0.0300601	0.0348562	0.0321704	0.0323622	0.0432973	0.0388849	0.041187	0.0429136	0.0400359	0.027758	0.0444483	0.0513546	0.0406115	0.0482852	0.0396523	0.0461749	0.0335133	0.0502036	0.0291009	0.0452157
cg00548060	0.909613	0.94675	0.927976	0.93565	0.75572	0.93798	0.914136	0.893032	0.919891	0.885769	0.938802	0.944421	0.965662	0.958947	0.959221	0.94675	0.921399	0.932636	0.875491	0.927839	0.969362	0.753528	0.903995	0.947573	0.913861	0.94168	0.793132	0.935513	0.934554	0.939624	0.949491	0.941132	0.942776	0.958536	0.921399	0.931676	0.924276	0.901254	0.919891	0.93428	0.888236	0.928661	0.96155	0.915917	0.917561	0.654587	0.932361	0.980599	0.752295
cg00548268	0.671335	0.44333	0.74473	0.817692	0.628339	0.783491	0.618459	0.812372	0.813132	0.706513	0.780234	0.736805	0.749616	0.623019	0.772525	0.752331	0.71509	0.61303	0.72345	0.741908	0.710095	0.777954	0.765794	0.78816	0.61075	0.78816	0.747771	0.758954	0.799017	0.775891	0.857104	0.725513	0.553423	0.575898	0.14334	0.586973	0.782406	0.729422	0.779691	0.630511	0.765034	0.729856	0.702278	0.717044	0.747445	0.724319	0.756239	0.744622	0.720627
cg00550617	0.257205	0.346493	0.293083	0.244838	0.542057	0.236276	0.227034	0.258428	0.313061	0.362394	0.2023	0.216162	0.225132	0.459021	0.25503	0.441625	0.34826	0.314148	0.210454	0.233014	0.172673	0.564889	0.259651	0.298112	0.448556	0.289006	0.223637	0.286288	0.212629	0.241712	0.183273	0.43252	0.581197	0.214803	0.629035	0.319448	0.263592	0.406834	0.192923	0.224044	0.275959	0.297432	0.310615	0.31972	0.248099	0.235188	0.25041	0.227442	0.287375
cg00554250	0.711574	0.833742	0.849143	0.87516	0.625604	0.86994	0.743856	0.725235	0.802504	0.591408	0.756038	0.68808	0.737678	0.798762	0.698696	0.671461	0.758475	0.835047	0.763956	0.738374	0.848621	0.832611	0.765436	0.874812	0.862021	0.806158	0.735938	0.793802	0.531629	0.794585	0.734372	0.719666	0.495779	0.835134	0.730195	0.585665	0.796587	0.679031	0.78745	0.731413	0.685818	0.697043	0.536502	0.617686	0.579661	0.746989	0.816513	0.882035	0.668937
cg00554682	0.380738	0.0912765	0.560235	0.0278859	0.403789	0.653667	0.0340266	0.436476	0.540112	0.463779	0.573177	0.572044	0.128876	0.45197	0.497127	0.0292085	0.487302	0.0245794	0.401805	0.380927	0.0244849	0.0283583	0.539262	0.0655802	0.469353	0.65858	0.437988	0.0247683	0.0571722	0.0587782	0.0356326	0.282015	0.160241	0.446491	0.0323261	0.34021	0.435815	0.4976	0.656501	0.0253352	0.468408	0.549843	0.30535	0.259153	0.0538656	0.0394115	0.631277	0.0253352	0.392547
cg00554702	0.0780376	0.109045	0.0731158	0.0908343	0.110111	0.0917367	0.0800063	0.138002	0.090014	0.223724	0.0775454	0.049655	0.038745	0.0511316	0.0410418	0.196818	0.0783657	0.177458	0.0599909	0.118561	0.044077	0.175572	0.0667174	0.228563	0.0743462	0.0939515	0.0767251	0.0841078	0.0731158	0.0992014	0.0821391	0.0610573	0.0567917	0.0731158	0.108471	0.076561	0.0864867	0.116674	0.052116	0.0996936	0.127994	0.0793501	0.11167	0.177623	0.0429285	0.076561	0.0744282	0.0472762	0.100678
cg00556408	0.778471	0.806057	0.684656	0.705094	0.646236	0.821582	0.805946	0.825267	0.565488	0.818455	0.377298	0.491217	0.843137	0.693479	0.786624	0.671477	0.832639	0.814881	0.494232	0.67103	0.891832	0.350047	0.757698	0.849503	0.576879	0.503502	0.585367	0.860672	0.364566	0.538125	0.818566	0.851067	0.562249	0.829511	0.839228	0.769313	0.842355	0.624122	0.559568	0.464301	0.880887	0.860672	0.810078	0.787071	0.7797	0.496689	0.873069	0.8705	0.621442
cg00557354	0.200707	0.729739	0.357318	0.0179785	0.613357	0.63196	0.0786435	0.647814	0.674664	0.0715873	0.668066	0.709945	0.356035	0.060499	0.085883	0.117498	0.686394	0.190443	0.114841	0.0975212	0.341922	0.572761	0.105494	0.0738783	0.131244	0.744218	0.683278	0.681262	0.533448	0.501558	0.74156	0.558099	0.264304	0.0649893	0.104944	0.582841	0.13995	0.662018	0.614365	0.0246682	0.675763	0.674297	0.438693	0.514204	0.508797	0.0655392	0.697207	0.0781853	0.338257
cg00559473	0.0513386	0.045562	0.0502555	0.0457425	0.0430347	0.152971	0.0448399	0.0477282	0.0657801	0.0618087	0.0376192	0.0506165	0.035814	0.0399659	0.035453	0.060184	0.0535048	0.0609061	0.0536853	0.0488113	0.0284127	0.0591009	0.0574762	0.0545879	0.0392438	0.0545879	0.069571	0.0379802	0.0520607	0.0325647	0.0253439	0.040327	0.0363555	0.050075	0.0692099	0.0623502	0.0461036	0.0802216	0.0493529	0.0634333	0.0426737	0.0609061	0.0437568	0.045201	0.0475477	0.059823	0.0560321	0.0293153	0.0628918
cg00560119	0.0306989	0.0320434	0.033724	0.0300267	0.0318753	0.0320434	0.0261613	0.0301948	0.0241446	0.0303628	0.0273378	0.0298586	0.0296906	0.0343962	0.0271697	0.0290183	0.0197751	0.0286822	0.0226321	0.0211196	0.0219599	0.0359088	0.0278419	0.0276739	0.0268336	0.0323795	0.0375893	0.0327156	0.0342282	0.0209515	0.0300267	0.0224641	0.0300267	0.0296906	0.0286822	0.0256572	0.0291864	0.0266655	0.0254891	0.0263294	0.02801	0.0322115	0.0303628	0.0367491	0.0281781	0.030867	0.0387658	0.02801	0.0315392
cg00563229	0.027327	0.0182971	0.027083	0.0213478	0.0250085	0.0286693	0.0355028	0.022568	0.0252526	0.0359909	0.0181751	0.0196394	0.0180531	0.0281812	0.0182971	0.031964	0.026961	0.0402618	0.0206156	0.0200055	0.0171989	0.0383094	0.0265949	0.0254967	0.0279372	0.017565	0.0231782	0.017809	0.0340385	0.0235442	0.0219579	0.0206156	0.0184191	0.0340385	0.0385534	0.0274491	0.0218359	0.0278151	0.0193954	0.0257407	0.0186632	0.0228121	0.0229341	0.0254967	0.022202	0.0289134	0.0301336	0.0151244	0.0258627
cg00563845	0.115323	0.0865144	0.100427	0.0949463	0.239132	0.170834	0.148208	0.110545	0.444028	0.0908709	0.144133	0.124599	0.0870765	0.0855307	0.0681047	0.162121	0.170834	0.0894656	0.111108	0.130501	0.0579864	0.0896061	0.091152	0.0765366	0.140479	0.122491	0.207653	0.124739	0.0678236	0.185168	0.400042	0.173504	0.249813	0.0835632	0.135982	0.103378	0.0790662	0.119539	0.112232	0.080331	0.131766	0.231122	0.0986002	0.190508	0.158607	0.187838	0.282135	0.074007	0.244894
cg00563926	0.217494	0.13605	0.167412	0.125857	0.247289	0.401749	0.126543	0.151241	0.172901	0.163982	0.109391	0.223669	0.202989	0.337456	0.138402	0.199363	0.43566	0.149771	0.179761	0.256697	0.13948	0.19407	0.682542	0.472805	0.16261	0.164864	0.21524	0.164962	0.107235	0.296685	0.434484	0.169176	0.173587	0.680778	0.222493	0.386166	0.126641	0.492406	0.149673	0.130953	0.589924	0.356273	0.132717	0.283846	0.294528	0.201813	0.702927	0.153887	0.619915
cg00563932	0.690803	0.758321	0.597332	0.839805	0.499684	0.681456	0.684974	0.705538	0.7294	0.652975	0.713345	0.620975	0.806046	0.372784	0.769317	0.707077	0.739847	0.709716	0.663531	0.558735	0.539161	0.4789	0.624934	0.638899	0.54235	0.752273	0.544329	0.599972	0.799338	0.599972	0.770527	0.773166	0.500453	0.746665	0.609429	0.697071	0.507711	0.616906	0.837825	0.346173	0.821111	0.724672	0.720823	0.600851	0.689373	0.581498	0.702349	0.710376	0.696411
cg00564163	0.0833242	0.0811475	0.144073	0.0674937	0.123494	0.0783771	0.105487	0.0912394	0.0926245	0.132992	0.114194	0.091833	0.0892606	0.0730344	0.0754089	0.0971758	0.0969779	0.0667022	0.0900521	0.0995504	0.0750132	0.0896563	0.0981652	0.0680874	0.0710556	0.0896563	0.0993525	0.161685	0.0746174	0.0831263	0.0856987	0.17336	0.153176	0.0765962	0.0955927	0.118547	0.0813454	0.0855008	0.0712534	0.0597764	0.0985609	0.138137	0.0851051	0.150801	0.138731	0.083522	0.107663	0.0516633	0.14724
cg00565075	0.239441	0.117848	0.239702	0.234313	0.168345	0.417703	0.292459	0.151136	0.411705	0.110981	0.319229	0.274641	0.225448	0.216409	0.109765	0.358079	0.302715	0.137403	0.12115	0.162348	0.0892528	0.142444	0.261778	0.200677	0.543729	0.442821	0.227447	0.404405	0.100639	0.200156	0.157481	0.383284	0.159567	0.350952	0.119934	0.167563	0.18651	0.479064	0.294632	0.0815175	0.438475	0.599354	0.196505	0.385805	0.198417	0.270556	0.101247	0.0803007	0.450643
cg00565688	0.477393	0.701946	0.466105	0.00853288	0.134685	0.685389	0.119163	0.669585	0.492727	0.168645	0.300348	0.341175	0.0887773	0.0303578	0.0275357	0.0406118	0.467045	0.0874602	0.23111	0.0936691	0.0106966	0.0965853	0.473066	0.530733	0.0677049	0.677769	0.125466	0.667797	0.462812	0.0482317	0.809942	0.285296	0.0848262	-0.0119751	0.0505836	0.54221	0.0851084	0.581156	0.397807	0.609096	0.635154	0.580592	0.126877	0.624241	0.594232	0.0945157	0.561871	0.674665	0.514364
cg00566759	0.0463011	0.0473979	0.0548013	0.0413655	0.0463011	0.0569949	0.0600111	0.0254619	0.0243651	0.117319	0.0367041	0.0424623	0.0254619	0.0388977	0.0367041	0.0473979	0.0534303	0.0454785	0.0394461	0.0484947	0.0260103	0.0293007	0.0282039	0.0262845	0.0287523	0.0260103	0.0290265	0.0383493	0.0303975	0.0298491	0.0397203	0.0336879	0.0424623	0.0402687	0.0402687	0.0334137	0.0558981	0.0372525	0.0254619	0.0539787	0.0380751	0.0197037	0.0279297	0.0685113	0.0443817	0.0361557	0.0177843	0.0147681	0.0320427
cg00567479	0.0278257	0.0314428	0.0323864	0.0259385	0.0271966	0.0248376	0.0355318	0.0496859	0.037419	0.0496859	0.0187041	0.0227931	0.0276684	0.0188614	0.0227931	0.0297129	0.0265675	0.0506296	0.0278257	0.0254666	0.0185468	0.0396208	0.0377336	0.0298702	0.0246803	0.0352173	0.0306565	0.0193332	0.0320719	0.022164	0.0316001	0.0226358	0.0213777	0.0293984	0.0223213	0.030971	0.0289265	0.0437098	0.0284547	0.0389917	0.0477987	0.0500005	0.0301847	0.0328583	0.024523	0.0281402	0.0360036	0.00738081	0.0411935
cg00567749	0.117138	0.10922	0.345819	0.461321	0.612403	0.943811	0.10109	0.572494	0.784389	0.67216	0.640275	0.804237	0.542088	0.101724	0.316363	0.422363	0.786289	0.475363	0.776893	0.116822	0.090955	0.575767	0.769502	0.542721	0.120094	0.764329	0.335156	0.779215	0.922378	0.358277	0.898307	0.625811	0.313301	0.180274	0.178479	0.500913	0.404837	0.565315	0.522134	0.112176	0.858082	0.764646	0.559508	0.705311	0.62296	0.376859	0.809833	0.0852538	0.492783
cg00568128	0.0569423	0.0715845	0.0459054	0.043183	0.0623135	0.0519389	0.054882	0.0807819	0.086006	0.03531	0.0404605	0.058561	0.0370759	0.0509088	0.0328819	0.0471562	0.0561329	0.0573837	0.0606948	0.0345742	0.0314103	0.0511295	0.0468619	0.065036	0.0595911	0.092996	0.0900529	0.0610627	0.0484807	0.0365608	0.0357515	0.0604005	0.0333969	0.0494372	0.0598118	0.0567951	0.0574573	0.0604741	0.0702601	0.0537784	0.0303066	0.0577516	0.0414171	0.0595911	0.0437716	0.0425207	0.0581931	0.0346478	0.0482599
cg00568792	0.0387043	0.0438186	0.0427605	0.0494619	0.0462876	0.0431132	0.0411733	0.0388807	0.0387043	0.0395861	0.0454058	0.0394098	0.0746805	0.0549289	0.0450531	0.0492856	0.0526363	0.0417024	0.0420551	0.0431132	0.0510491	0.0388807	0.0388807	0.0676264	0.0431132	0.0702717	0.0522836	0.0482274	0.0348246	0.0538708	0.0344719	0.0372935	0.0563397	0.0510491	0.0464639	0.0484038	0.0512255	0.049991	0.05052	0.0406442	0.0473457	0.0552816	0.0344719	0.0448767	0.0588087	0.0397625	0.0517545	0.046993	0.0464639
cg00569620	0.045741	0.0996188	0.0453328	0.04819	0.0563533	0.0551288	0.0714554	0.0351287	0.0510471	0.0420675	0.0375776	0.0379858	0.0281898	0.0490063	0.0490063	0.0449246	0.0204347	0.0783942	0.0306388	0.0363531	0.0281898	0.0322715	0.0245163	0.0563533	0.0281898	0.0714554	0.0563533	0.0355368	0.0453328	0.0249245	0.0375776	0.0355368	0.0253327	0.038394	0.0351287	0.0441083	0.0510471	0.0571696	0.0298225	0.0314552	0.0514553	0.0273735	0.0788024	0.0637003	0.0522716	0.119619	0.0400266	0.018802	0.0547206
cg00571634	0.0628444	0.123061	0.110136	0.112831	0.177274	0.0736871	0.104561	0.174824	0.132678	0.184074	0.123796	0.063212	0.0310516	0.0864287	0.0347883	0.0954949	0.101927	0.0709305	0.0554935	0.0783427	0.0317254	0.119569	0.096475	0.10597	0.121039	0.148973	0.214335	0.0940247	0.0765662	0.0522468	0.0393214	0.0872863	0.024497	0.0825082	0.0861224	0.0746672	0.106031	0.0852648	0.0583113	0.0565961	0.0836721	0.0771788	0.120059	0.121223	0.0904105	0.0873476	0.0889403	0.0366873	0.110626
cg00573606	0.726851	0.527787	0.6387	0.868612	0.764202	0.581134	0.837324	0.86413	0.599502	0.720698	0.463541	0.374864	0.774925	0.283725	0.577355	0.813068	0.806476	0.842598	0.596251	0.759896	0.839258	0.605479	0.64371	0.407997	0.743373	0.733794	0.570763	0.84374	0.500102	0.479625	0.689938	0.653113	0.561535	0.551077	0.557668	0.451062	0.305872	0.477428	0.525853	0.386113	0.665242	0.864218	0.301918	0.719644	0.716216	0.527084	0.814474	0.833897	0.717535
cg00575744	0.12875	0.0879166	0.0888787	0.0911235	0.103523	0.198231	0.0891994	0.0891994	0.0975371	0.110685	0.0792582	0.0919786	0.0919786	0.0884511	0.0839616	0.0850305	0.0917648	0.086527	0.0947579	0.0901614	0.0816099	0.108761	0.12533	0.0899476	0.106196	0.0995681	0.480966	0.117419	0.0867408	0.0834271	0.0828926	0.103737	0.0851374	0.0862063	0.119878	0.0983923	0.093582	0.109082	0.104806	0.0950786	0.0993543	0.0888787	0.0884511	0.0979647	0.0953992	0.0871684	0.343821	0.0802203	0.253816
cg00576250	0.0437987	0.440688	0.049746	0.0555074	0.431953	0.368112	0.120091	0.342186	0.512613	0.333822	0.61	0.0418472	0.0325546	0.0373868	0.470703	0.069911	0.407327	0.168041	0.453698	0.0569942	0.0337626	0.289032	0.538725	0.039617	0.100484	0.660273	0.478416	0.594295	0.546438	0.096488	0.77894	0.364953	0.0399887	0.436599	0.0390594	0.095187	0.578312	0.187184	0.285872	0.359842	0.32834	0.592716	0.0859873	0.358727	0.236249	0.131057	0.655441	0.0280941	0.0465865
cg00577167	0.302299	0.224874	0.344939	0.25941	0.492557	0.205549	0.235596	0.232355	0.250682	0.482209	0.216396	0.291826	0.261405	0.166774	0.220635	0.32711	0.190463	0.248937	0.25916	0.254173	0.202806	0.346061	0.290829	0.213528	0.25941	0.263025	0.673589	0.30392	0.279109	0.189216	0.223752	0.176	1.08876	0.25143	0.39456	0.32312	0.422363	0.231108	0.20343	0.18186	0.31327	0.339203	0.28447	0.418748	0.243825	0.273623	0.337832	0.170889	0.429969
cg00577464	0.035757	0.036716	0.036853	0.0308252	0.0376749	0.0316472	0.0502783	0.0309622	0.036305	0.0383599	0.0283594	0.0346611	0.0269894	0.0334281	0.0253455	0.0401408	0.0376749	0.0337021	0.0338391	0.0387709	0.0261675	0.0426204	0.036716	0.035209	0.036853	0.131652	0.0439766	0.0520592	0.0375379	0.0245235	0.0282224	0.0426067	0.0332911	0.0453465	0.0409217	0.0375379	0.0334281	0.0374009	0.0301403	0.0374009	0.0300033	0.0435656	0.0339761	0.0523332	0.0849377	0.0374009	0.0337021	0.0200028	0.0557581
cg00579393	0.902866	0.556669	0.89207	0.792474	0.921252	0.900128	0.93244	0.88628	0.916245	0.670816	0.694522	0.957632	0.973045	0.619258	0.938777	0.893947	0.842546	0.790127	0.926572	0.866565	0.948478	0.792553	0.874466	0.550332	0.883933	0.925007	0.906544	0.938699	0.919922	0.903336	0.809765	0.946444	0.941985	0.682239	0.786137	0.910925	0.534371	0.811173	0.74295	0.916167	0.782851	0.897625	0.643277	0.891757	0.910847	0.499321	0.875797	0.877283	0.820796
cg00579402	0.571896	0.193135	0.281114	0.516933	0.526926	0.487346	0.348225	0.25525	0.518109	0.348029	0.606088	0.38036	0.585906	0.279253	0.274648	0.307077	0.45766	0.425231	0.336371	0.37262	0.181967	0.295712	0.293067	0.390157	0.416806	0.272395	0.436106	0.315405	0.252898	0.3301	0.181477	0.380948	0.511545	0.215473	0.455505	0.461481	0.31805	0.361941	0.400934	0.251037	0.343523	0.31707	0.423272	0.580811	0.42435	0.477646	0.333725	0.226446	0.385944
cg00581156	0.0312629	0.0285989	0.0284087	0.0295504	0.0299309	0.0343075	0.0303115	0.0221293	0.0257447	0.0312629	0.0230807	0.0261252	0.025935	0.0249835	0.0265058	0.0253641	0.033356	0.0335463	0.0295504	0.0341172	0.0215584	0.0274572	0.0293601	0.0291698	0.0287892	0.0352589	0.0263155	0.0227001	0.0257447	0.021939	0.0227001	0.0238418	0.0234613	0.0265058	0.0287892	0.0301212	0.0369714	0.0314532	0.0211779	0.0282184	0.0466759	0.0312629	0.03602	0.0297406	0.0398257	0.0310726	0.0301212	0.0194653	0.0341172
cg00582628	0.333846	0.108291	0.259915	0.142165	0.275239	0.366509	0.290832	0.193109	0.419202	0.165554	0.118642	0.136116	0.103721	0.105603	0.0819452	0.144181	0.13625	0.229806	0.103049	0.090548	0.214885	0.222816	0.149558	0.163941	0.104662	0.156682	0.539103	0.131277	0.19069	0.115281	0.0996885	0.411808	0.231956	0.14203	0.287202	0.171602	0.108963	0.168242	0.105065	0.11098	0.13746	0.133024	0.289756	0.135041	0.144315	0.136116	0.157354	0.0935052	0.150364
cg00584022	0.0437013	0.0424714	0.048621	0.0527206	0.0490309	0.0572303	0.0416515	0.0293524	0.035502	0.0490309	0.0449312	0.0449312	0.0465711	0.0420615	0.0232029	0.0412415	0.0465711	0.0502608	0.0322222	0.0396016	0.0305823	0.0441113	0.0441113	0.0375518	0.0391917	0.0629699	0.0523107	0.047801	0.0457512	0.0277125	0.0391917	0.0445213	0.0338621	0.0428814	0.0547705	0.0490309	0.0789587	0.0301724	0.0260727	0.0564104	0.0564104	0.0437013	0.0396016	0.0457512	0.0379618	0.0473911	0.0506708	0.0297624	0.0510808
cg00585790	0.46371	0.39607	0.819699	0.805792	0.220063	0.590952	0.315336	0.232254	0.715936	0.454408	0.174096	0.170845	0.699681	0.821144	0.209858	0.335294	0.396341	0.789446	0.182043	0.520693	0.30766	0.40203	0.300255	0.453415	0.826833	0.31073	0.247245	0.246251	0.775719	0.788001	0.816448	0.439508	0.49306	0.755671	0.715575	0.511482	0.795677	0.265938	0.835864	0.448358	0.375751	0.220514	0.286799	0.214915	0.196583	0.603956	0.341435	0.191164	0.58752
cg00585846	0.0297864	0.0370723	0.0333631	0.0256797	0.0333631	0.0285941	0.033893	0.0299188	0.036145	0.0327007	0.0255472	0.026607	0.0250173	0.0299188	0.0234277	0.0260771	0.031641	0.0292565	0.0317734	0.0292565	0.0231627	0.0324358	0.0353502	0.0307137	0.0369399	0.0374698	0.0511144	0.0232952	0.0319059	0.0227653	0.0267395	0.0307137	0.0295214	0.0349528	0.0333631	0.0319059	0.0308461	0.0281967	0.0432985	0.0308461	0.0270044	0.0332306	0.0246199	0.0337605	0.0219705	0.0333631	0.028859	0.0153469	0.0350853
cg00586909	0.0711665	0.0877656	0.0643359	0.0842402	0.117732	0.0910708	0.0591211	0.10106	0.0801271	0.10767	0.0544939	0.041053	0.033341	0.0642624	0.0419344	0.0796864	0.0594149	0.0965793	0.0498667	0.0820367	0.053025	0.150269	0.0688162	0.110314	0.0451661	0.0873984	0.0765282	0.0506012	0.0594884	0.0431096	0.0517029	0.0716072	0.0322393	0.0713868	0.112297	0.0754265	0.105907	0.0843871	0.0619121	0.06911	0.112664	0.0688162	0.0739575	0.0724151	0.0452395	0.0687427	0.101353	0.0301094	0.0637483
cg00587613	0.852869	0.577957	0.866231	0.654427	0.732522	0.787866	0.556199	0.587888	0.816214	0.692527	0.464742	0.606306	0.616237	0.849078	0.529836	0.501126	0.730987	0.851244	0.481986	0.874176	0.653614	0.619126	0.768274	0.783351	0.825423	0.788768	0.889163	0.68079	0.445783	0.862169	0.770802	0.836077	0.79888	0.876162	0.868488	0.809714	0.720243	0.818201	0.392606	0.580846	0.88176	0.870655	0.73189	0.836077	0.706791	0.802943	0.791477	0.82434	0.857654
cg00592315	0.937013	0.899869	0.896742	0.886887	0.88196	0.896079	0.895605	0.901669	0.872863	0.874948	0.940804	0.833161	0.934645	0.423908	0.943836	0.912661	0.889351	0.8704	0.949332	0.805302	0.948669	0.796206	0.940614	0.540837	0.880918	0.932086	0.693869	0.957481	0.822264	0.795258	0.951037	0.909724	0.79649	0.948384	0.85685	0.89172	0.902522	0.924127	0.87618	0.660799	0.89172	0.938814	0.830697	0.898637	0.882623	0.900911	0.931233	0.958049	0.901669
cg00594118	0.055355	0.0412979	0.0801012	0.0740977	0.0856655	0.0597478	0.0615049	0.0459104	0.226968	0.0631888	0.0421033	0.0546228	0.063921	0.0879351	0.081053	0.13179	0.0582103	0.0634817	0.0484729	0.05843	0.0431283	0.137135	0.070437	0.0534514	0.0658245	0.135304	0.140356	0.103164	0.0549889	0.0623835	0.0424694	0.116781	0.082444	0.0571121	0.0848601	0.0552086	0.0677281	0.0623103	0.0458372	0.0654585	0.057405	0.0465693	0.0606264	0.0739513	0.162174	0.0770262	0.102944	0.0386623	0.0748298
cg00594952	0.718627	0.515457	0.708053	0.861419	0.88628	0.874737	0.890962	0.829857	0.886199	0.647191	0.87732	0.761569	0.874091	0.57979	0.415527	0.841965	0.872719	0.65389	0.435142	0.808225	0.873526	0.862306	0.789094	0.868522	0.849634	0.653406	0.773758	0.887894	0.609172	0.885311	0.649209	0.857221	0.738322	0.853589	0.858916	0.814521	0.648401	0.781588	0.847777	0.572122	0.852862	0.900648	0.881598	0.884262	0.874979	0.726699	0.875706	0.36758	0.875464
cg00597076	0.6776	0.364275	0.778191	0.366794	0.685071	0.794435	0.610453	0.500133	0.715474	0.593167	0.592472	0.373395	0.589692	0.754043	0.329962	0.527322	0.738928	0.734498	0.648413	0.770547	0.361929	0.608802	0.577096	0.73554	0.777236	0.795304	0.557986	0.710436	0.366099	0.713824	0.638511	0.709654	0.605067	0.598552	0.650064	0.672475	0.559289	0.700186	0.597597	0.396415	0.795043	0.687329	0.581527	0.581527	0.582395	0.696885	0.749178	0.761426	0.689588
cg00598858	0.0279763	0.0240477	0.0304083	0.0262926	0.0270409	0.0255443	0.0347111	0.0232993	0.0227381	0.0377044	0.0214286	0.0242347	0.0218027	0.0262926	0.0216156	0.0257314	0.0232993	0.0218027	0.0253572	0.0294729	0.022551	0.0264797	0.0270409	0.0276022	0.0218027	0.0246089	0.0180611	0.0244218	0.0259184	0.0266668	0.0261055	0.0173128	0.0249831	0.0219898	0.027228	0.0231123	0.0298471	0.0322791	0.0180611	0.039014	0.0264797	0.0244218	0.0287246	0.0255443	0.0373302	0.0208673	0.0240477	0.0158162	0.0274151
cg00600110	0.661595	0.629163	0.6737	0.52547	0.569322	0.55539	0.635558	0.644465	0.679639	0.645151	0.728516	0.655885	0.706818	0.530723	0.732627	0.621169	0.509939	0.58097	0.657484	0.318312	0.734911	0.512679	0.616829	-0.162467	0.593989	0.691515	0.431598	0.732856	0.531408	0.699281	0.638755	0.734683	0.723034	0.670503	0.664564	0.617057	0.0108874	0.595588	0.680096	0.412412	0.554019	0.687861	0.376325	0.609064	0.644009	0.510852	0.635786	0.600384	0.619798
cg00600684	0.880648	0.931052	0.943365	0.945866	0.936439	0.900271	0.965297	0.936439	0.935862	0.938748	0.949714	0.953176	0.9349	0.95183	0.949329	0.947213	0.880071	0.904696	0.956255	0.928551	0.950098	0.926628	0.9349	0.929898	0.928167	0.937016	0.949329	0.932014	0.932207	0.932207	0.943557	0.94375	0.950675	0.937401	0.943173	0.900656	0.867566	0.936439	0.946058	0.925666	0.8364	0.906812	0.944327	0.948752	0.943557	0.928167	0.935477	0.954908	0.923357
cg00601486	0.915525	0.833738	0.913253	0.912496	0.855699	0.903882	0.920826	0.926127	0.918933	0.891008	0.935309	0.925843	0.926695	0.658332	0.92944	0.749774	0.885328	0.92253	0.885612	0.531013	0.893942	0.918649	0.885044	0.674708	0.707745	0.925654	0.892428	0.928872	0.918081	0.846139	0.928399	0.912117	0.524387	0.904828	0.733777	0.893185	0.853238	0.907384	0.937202	0.652368	0.878986	0.918365	0.900569	0.852197	0.879838	0.620468	0.899338	0.939853	0.894605
cg00602891	0.0440412	0.117795	0.0463149	0.0554098	0.0596731	0.0390674	0.0505782	0.0443254	0.0470255	0.0458886	0.0376463	0.0369358	0.0436149	0.0448938	0.0434728	0.0500097	0.051715	0.0578257	0.0429043	0.0438991	0.0322462	0.0701891	0.0362252	0.0575415	0.0377884	0.0942054	0.0565467	0.0409148	0.0413411	0.0353726	0.0475939	0.0329567	0.0450359	0.0430464	0.0429043	0.0495834	0.0446096	0.0447517	0.0288356	0.0522835	0.0573994	0.0419096	0.0556941	0.0495834	0.0609521	0.03992	0.0528519	0.0305409	0.050294
cg00605270	0.0445708	0.0333466	0.0321581	0.0325543	0.042326	0.0351953	0.0456272	0.0399491	0.0457593	0.0362517	0.0256877	0.0307056	0.0296492	0.0321581	0.0256877	0.0630578	0.0353273	0.037176	0.0378363	0.0324222	0.028989	0.058304	0.0374401	0.0361196	0.0333466	0.0271403	0.0427221	0.0280646	0.0338748	0.029121	0.0303095	0.0336107	0.031894	0.0332145	0.0546066	0.0408734	0.0375722	0.0406093	0.0275364	0.0387606	0.0330825	0.0440426	0.0412696	0.0419298	0.0297813	0.0399491	0.0577758	0.0222544	0.0392888
cg00609097	0.029059	0.0271303	0.0302162	0.029059	0.032145	0.029059	0.0282875	0.021344	0.0267445	0.0286732	0.0194153	0.0271303	0.0267445	0.021344	0.0144006	0.0309877	0.0255873	0.0313735	0.0190296	0.0294447	0.0182581	0.0286732	0.0209583	0.0325307	0.0282875	0.0398599	0.0568328	0.0209583	0.0298305	0.0174866	0.0255873	0.0313735	0.0205725	0.0367739	0.0271303	0.0294447	0.0267445	0.0271303	0.025973	0.0255873	0.033688	0.029059	0.0271303	0.0263588	0.0464176	0.0248158	0.0279017	0.0198011	0.0236585
cg00611397	0.933936	0.901742	0.916972	0.938393	0.91301	0.942851	0.933317	0.943222	0.937774	0.923039	0.919944	0.941365	0.923906	0.927373	0.857415	0.927126	0.93245	0.923659	0.900752	0.937403	0.89357	0.926011	0.910038	0.948423	0.915363	0.936783	0.94186	0.930221	0.904219	0.922544	0.908924	0.931583	0.92143	0.915115	0.914496	0.922297	0.924154	0.937155	0.958081	0.891589	0.916601	0.930716	0.944213	0.913505	0.935174	0.915115	0.910905	0.930221	0.934802
cg00612467	0.0470875	0.0774719	0.0654346	0.050388	0.0857233	0.0607751	0.0670849	0.0985372	0.068541	0.113681	0.0365063	0.0448548	0.0376712	0.0504851	0.0357298	0.0566979	0.0717445	0.0566979	0.0397098	0.0533974	0.0341766	0.0759187	0.05165	0.062037	0.0523295	0.0631049	0.0633961	0.0389332	0.059416	0.0342736	0.0427191	0.0448548	0.0372829	0.0585423	0.0960132	0.0511646	0.0501939	0.0633961	0.0383508	0.0499027	0.04767	0.0547564	0.0596102	0.0587365	0.0433987	0.0533003	0.06592	0.0317497	0.0673761
cg00613255	0.677983	0.484527	0.447453	0.25587	0.51608	0.572381	0.338597	0.286437	0.840084	0.642487	0.76426	0.52101	0.368276	0.587664	0.46668	0.714466	0.403871	0.794432	0.383658	0.542604	0.693858	0.648107	0.461948	0.582537	0.712297	0.54852	0.665362	0.571987	0.378432	0.647121	0.68173	0.516869	0.646135	0.76988	0.56469	0.734088	0.68597	0.535307	0.273619	0.529194	0.571592	0.684393	0.596341	0.53087	0.264942	0.524559	0.720086	0.41245	0.645741
cg00615377	0.0709015	0.112061	0.083675	0.0510315	0.0978678	0.0886425	0.0730304	0.0834385	0.0853308	0.0765786	0.048666	0.0891156	0.0619127	0.0519777	0.0805999	0.0829654	0.061203	0.0744497	0.0545797	0.088406	0.0550528	0.0604934	0.0666436	0.0545797	0.0770517	0.0914811	0.113243	0.0914811	0.0782344	0.0472468	0.0604934	0.0730304	0.0522142	0.105437	0.0690091	0.0907714	0.0832019	0.0761055	0.0444082	0.0779979	0.0858039	0.0749228	0.0789441	0.141156	0.117501	0.0578914	0.0548163	0.0247748	0.104964
cg00615915	0.0816965	0.0682691	0.0661076	0.0489467	0.0562171	0.0511082	0.0656491	0.0560861	0.0994468	0.0420037	0.0412832	0.0699065	0.0294933	0.0467852	0.0294278	0.0505842	0.0685311	0.0742295	0.0682691	0.0528112	0.0242534	0.0510427	0.0654526	0.0761945	0.078356	0.108355	0.120996	0.0530732	0.0665661	0.0228124	0.0233364	0.0568721	0.0256944	0.0520252	0.0513702	0.0775045	0.070365	0.072068	0.0782905	0.0488157	0.0661076	0.0900149	0.0609986	0.07888	0.0543832	0.0556276	0.0639461	0.0249084	0.0742295
cg00616129	0.058905	0.035205	0.045862	0.0332962	0.037909	0.0342506	0.0304332	0.0262976	0.0283654	0.0367956	0.0288425	0.0290016	0.0302741	0.0344097	0.0315466	0.0337734	0.0305922	0.0452258	0.0312285	0.0437943	0.0262976	0.035364	0.024866	0.0258204	0.0414083	0.0425218	0.0317056	0.035205	0.0243888	0.0280472	0.0220029	0.0401359	0.0313875	0.0250251	0.0387043	0.0682896	0.0407721	0.0356822	0.0251841	0.0396587	0.0296379	0.0293197	0.0290016	0.0503157	0.0375909	0.0391815	0.0382271	0.0224801	0.0414083
cg00616369	0.0121312	0.0143137	0.0139499	0.0149199	0.0143137	0.0140712	0.0154049	0.0162537	0.01589	0.0151624	0.0111612	0.0122524	0.0112824	0.0107974	0.0107974	0.0139499	0.0135862	0.0123737	0.0133437	0.0164962	0.0104337	0.0128587	0.0115249	0.0144349	0.0123737	0.0157687	0.0139499	0.0128587	0.0124949	0.0101912	0.0118887	0.0106762	0.0120099	0.0126162	0.0135862	0.0132224	0.0122524	0.0132224	0.0124949	0.0138287	0.0147987	0.0134649	0.0194062	0.0128587	0.0139499	0.0122524	0.0133437	0.00861489	0.0121312
cg00617305	0.044026	0.0437267	0.0443253	0.0447244	0.0419307	0.049813	0.045822	0.0393366	0.746743	0.0451235	0.328286	0.0416314	0.0415316	0.0433276	0.0425294	0.0421303	0.0456224	0.0422301	0.041831	0.0426292	0.0393366	0.0410328	0.0416314	0.044026	0.0423298	0.0878273	0.0427289	0.040933	0.0396359	0.0426292	0.0425294	0.187603	0.0414319	0.0379397	0.0408332	0.0437267	0.0450238	0.0432278	0.0414319	0.0426292	0.0437267	0.057795	0.0415316	0.0468197	0.04672	0.0439262	0.0544026	0.0373411	0.0406337
cg00618396	0.462572	0.0140542	0.497917	0.508103	0.522032	0.437326	0.0134448	0.0171012	0.291331	0.0158824	0.0149248	0.0123131	0.562427	0.0138801	0.567128	0.0198	0.493739	0.501313	0.0165789	0.0170141	0.0124001	0.036602	0.0177977	0.487732	0.533437	0.0154471	0.364024	0.0146636	0.021367	0.0126613	0.360193	0.122179	0.0125742	0.0157083	0.427314	0.458219	0.0149248	0.0234564	0.549368	0.0172753	0.495915	0.500703	0.335643	0.0192776	0.0242399	0.0225858	0.528823	0.0085696	0.359584
cg00619207	0.517109	0.255291	0.677194	0.565751	0.417499	0.706015	0.470894	0.160534	0.637451	0.562414	0.462905	0.289269	0.302012	0.605899	0.218177	0.295337	0.54138	0.531975	0.310405	0.672238	0.242751	0.313136	0.451478	0.504873	0.755567	0.305854	0.530458	0.332653	0.312529	0.730892	0.670418	0.637855	0.432971	0.182378	0.629765	0.426803	0.72887	0.30454	0.578999	0.307371	0.348126	0.423566	0.324563	0.332956	0.319001	0.521053	0.491018	0.23911	0.29473
cg00620223	0.0708391	0.0622825	0.0531737	0.0476533	0.0771876	0.0418568	0.0548299	0.0559339	0.0553819	0.0556579	0.0360604	0.0396486	0.0266756	0.0482053	0.0321961	0.0849163	0.0650427	0.0595222	0.0515176	0.0528977	0.0222593	0.0785678	0.0459972	0.0504135	0.0504135	0.0846402	0.10479	0.0327481	0.0523457	0.0252955	0.0283317	0.0407527	0.0258475	0.0506895	0.0639386	0.0711152	0.0451691	0.0551059	0.0620064	0.0625585	0.0473773	0.0636626	0.03192	0.0586942	0.0421328	0.0622825	0.0589702	0.0117704	0.0724953
cg00620629	0.0198202	0.027796	0.0194475	0.0197456	0.0280196	0.0178076	0.0200438	0.0304795	0.0214601	0.0307776	0.0154223	0.0133352	0.0125152	0.0221309	0.0143787	0.0286905	0.019522	0.0201929	0.0165404	0.0164659	0.0101299	0.0340574	0.0186275	0.0211619	0.0205656	0.0227273	0.0259325	0.0144533	0.0216837	0.013037	0.0163168	0.0157204	0.0128879	0.0222055	0.0301813	0.0200438	0.0198202	0.0275724	0.0190748	0.0187766	0.0172858	0.018553	0.0174349	0.0216092	0.0156459	0.0231	0.0221309	0.00945904	0.0204165
cg00622552	0.0805572	0.0721969	0.0805572	0.0679652	0.226501	0.0579535	0.0754998	0.0856147	0.121636	0.0839632	0.077564	0.0725066	0.0679652	0.0676556	0.0578503	0.118849	0.114308	0.0650752	0.0657977	0.0945942	0.0555796	0.0855114	0.114205	0.0602242	0.0691006	0.0742612	0.201833	0.141247	0.0622885	0.102542	0.0521736	0.151361	0.20658	0.0647656	0.184803	0.12081	0.0824151	0.104399	0.0850986	0.0632174	0.113689	0.115959	0.0769448	0.140008	0.0668299	0.0740548	0.103987	0.0483547	0.12948
cg00622677	0.0342363	0.0355002	0.0571018	0.0295253	0.0539995	0.0412453	0.0442328	0.0523908	0.0688218	0.0560677	0.0657195	0.0325128	0.0305594	0.0372238	0.0283763	0.0591701	0.031019	0.0340065	0.0330873	0.04745	0.0317085	0.0458414	0.0433136	0.0375685	0.0458414	0.0559528	0.218769	0.075716	0.0418198	0.0412453	0.0696262	0.0327426	0.0443477	0.033432	0.0414751	0.0365343	0.0410155	0.0367641	0.0355002	0.0338916	0.0402112	0.0342363	0.0326277	0.0356151	0.0326277	0.0400963	0.0443477	0.0281465	0.0418198
cg00623593	0.776702	0.874624	0.692101	0.834958	0.767357	0.760995	0.701446	0.832572	0.677587	0.533438	0.81766	0.71099	0.781176	0.71785	0.686733	0.840923	0.544373	0.858519	0.605612	0.653132	0.665558	0.432335	0.694289	0.762287	0.870747	0.925325	0.842215	0.798374	0.858817	0.833666	0.635834	0.819649	0.839531	0.846391	0.773322	0.779784	0.862794	0.829391	0.528865	0.859414	0.859116	0.899279	0.601735	0.598852	0.522503	0.496257	0.85335	0.883074	0.751451
cg00625425	0.677682	0.276708	0.321458	0.829577	0.586578	0.497163	0.368487	0.492182	0.866728	0.551961	0.363168	0.337838	0.777566	0.508984	0.312508	0.43063	0.560742	0.798844	0.455622	0.407073	0.455622	0.472678	0.358608	0.477913	0.360972	0.69727	0.639349	0.785672	0.950317	0.555845	0.642304	0.613428	0.541406	0.741429	0.87838	0.765915	0.744806	0.55956	0.45368	0.410282	0.62736	0.858538	0.647117	0.386556	0.425986	0.490409	0.850264	0.29351	0.504931
cg00625653	0.0726994	0.707105	0.212474	0.115396	0.584813	0.735177	0.208607	0.737194	0.670039	0.13498	0.702482	0.677015	0.699204	0.0624453	0.0585791	0.0589993	0.621962	0.0630337	0.0579907	0.50152	0.0565619	0.677099	0.0591674	0.0708503	0.0746325	0.731647	0.670711	0.706852	0.42016	0.146999	0.658944	0.361073	0.374269	0.0577386	0.0964013	0.504798	0.0628656	0.646925	0.710214	0.0647987	0.564305	0.669618	0.201043	0.106655	0.499334	0.0746325	0.704583	0.418899	0.127752
cg00626119	0.692203	0.806008	0.585321	0.796253	0.651296	0.754926	0.734473	0.652974	0.774121	0.69944	0.845761	0.602627	0.75608	0.781254	0.540848	0.709824	0.731536	0.774436	0.541267	0.738354	0.607452	0.676994	0.711712	0.736676	0.768877	0.60913	0.710139	0.6621	0.543365	0.759437	0.834432	0.757339	0.616368	0.724613	0.755766	0.60441	0.764366	0.692203	0.80349	0.760066	0.776953	0.61406	0.738878	0.696818	0.639024	0.754297	0.698601	0.74234	0.643534
cg00626466	0.256315	0.107932	0.262597	0.117481	0.396658	0.184071	0.232318	0.207315	0.219125	0.371152	0.20543	0.231187	0.176784	0.188594	0.191107	0.2925	0.234077	0.105168	0.262974	0.236087	0.0904677	0.216989	0.230307	0.102027	0.205556	0.224025	0.299285	0.270136	0.157309	0.206687	0.0811702	0.361101	0.359216	0.110068	0.398668	0.420906	0.23571	0.331575	0.175904	0.0978806	0.218497	0.212089	0.234202	0.398919	0.312729	0.288857	0.189851	0.115345	0.290616
cg00629217	0.939768	0.891632	0.90316	0.948061	0.914284	0.903565	0.937645	0.839249	0.941285	0.908116	0.944723	0.908217	0.892239	0.947454	0.635884	0.904475	0.914588	0.941285	0.840563	0.923992	0.797281	0.888093	0.890722	0.923082	0.903969	0.932184	0.910442	0.94533	0.910138	0.923487	0.905486	0.931375	0.885463	0.938757	0.926521	0.93279	0.946645	0.931577	0.918734	0.883643	0.936835	0.93724	0.959892	0.885969	0.889913	0.910138	0.863519	0.876362	0.913678
cg00629585	0.384636	0.330398	0.448554	0.796567	0.410948	0.91311	0.345044	0.305824	0.809847	0.416285	0.798801	0.259778	0.362916	0.559635	0.728553	0.648004	0.295398	0.946868	0.428324	0.787135	0.428696	0.343058	0.736	0.853411	0.324565	0.980255	0.315132	0.292296	0.633359	0.450167	0.883571	0.589795	0.314388	0.447561	0.542011	0.549458	0.334246	0.694546	0.250593	0.30148	0.66811	0.551196	0.700504	0.420629	0.517809	0.53866	0.87873	0.2882	0.557649
cg00630164	0.0423832	0.0328837	0.0341227	0.0341227	0.0360846	0.0419702	0.0277209	0.0383562	0.0286502	0.0437255	0.0206995	0.0260688	0.0222483	0.0220418	0.0211125	0.0345358	0.0383562	0.0336065	0.0260688	0.0358781	0.0177051	0.034639	0.0287534	0.0395953	0.0322641	0.0348455	0.0535348	0.0232809	0.0229711	0.0179116	0.0352586	0.293811	0.026172	0.0436223	0.0325739	0.0349488	0.0336065	0.0440353	0.0224548	0.030612	0.0445516	0.0377367	0.0341227	0.0395953	0.0264818	0.029786	0.0777999	0.0146074	0.0315413
cg00630249	0.0456696	0.0324111	0.0464273	0.0358205	0.038851	0.0403662	0.044912	0.0320323	0.0422603	0.044912	0.0343052	0.0350628	0.0365781	0.0399874	0.0278653	0.0418815	0.038851	0.0502154	0.0392298	0.0380933	0.0418815	0.049079	0.0377145	0.0377145	0.0441544	0.0282441	0.0475637	0.0365781	0.040745	0.0335476	0.0335476	0.0369569	0.0354416	0.0456696	0.0380933	0.049079	0.0430179	0.0350628	0.0361993	0.0335476	0.034684	0.0411239	0.034684	0.038851	0.0494578	0.0437756	0.044912	0.0327899	0.040745
cg00630583	0.0176487	0.0175066	0.0185016	0.0137398	0.0155877	0.0175066	0.0160141	0.0124605	0.0135266	0.0137398	0.013953	0.0153034	0.0133845	0.0150902	0.011963	0.0157298	0.0152323	0.0217708	0.0121052	0.0162984	0.0126027	0.0162984	0.0152323	0.0165826	0.0135266	0.018928	0.0245426	0.0116788	0.0158009	0.011963	0.0145216	0.0205626	0.0128159	0.0143084	0.0182883	0.0148769	0.0241872	0.0152323	0.0224815	0.0287358	0.0196387	0.0153744	0.015943	0.0163694	0.0166537	0.0214865	0.0174355	0.0131712	0.0163694
cg00631230	0.0294478	0.0331282	0.0326263	0.0259346	0.0240944	0.0311207	0.0266038	0.0399872	0.0302842	0.0388162	0.0167335	0.0195775	0.0153952	0.0281094	0.0118821	0.0339647	0.0249309	0.0414928	0.0200794	0.0254328	0.010711	0.0716055	0.0249309	0.0266038	0.0269384	0.0239271	0.0247636	0.0179046	0.0344666	0.0153952	0.0172354	0.0230907	0.014726	0.0306188	0.0762897	0.0274403	0.0374778	0.0327936	0.0177373	0.0337974	0.0247636	0.0235925	0.0220869	0.0319572	0.023258	0.0358049	0.0562146	0.0133877	0.0304515
cg00633969	0.906701	0.477795	0.917305	0.908258	0.642198	0.917013	0.651829	0.334016	0.909814	0.833742	0.880241	0.604551	0.768953	0.873626	0.620213	0.468067	0.835104	0.82664	0.544626	0.905437	0.229246	0.503769	0.682861	0.711656	0.948337	0.861661	0.580814	0.522933	0.638404	0.45367	0.90495	0.923044	0.909912	0.876447	0.770413	0.918472	0.924601	0.749984	0.800667	0.52556	0.531105	0.704457	0.835201	0.93822	0.795122	0.925087	0.903783	0.579161	0.901448
cg00635481	0.0276109	0.0414534	0.0226991	0.029397	0.0316297	0.0343089	0.0240387	0.0186803	0.0195734	0.0204664	0.0222525	0.0262713	0.0240387	0.0298436	0.0155546	0.029397	0.0209129	0.0396672	0.0226991	0.0235921	0.0231456	0.0276109	0.021806	0.0387742	0.0226991	0.0267178	0.0267178	0.0258248	0.0195734	0.0231456	0.021806	0.0302901	0.0204664	0.0200199	0.0186803	0.0253783	0.0258248	0.0352019	0.0253783	0.0334158	0.0535097	0.0311832	0.0338623	0.0195734	0.0311832	0.0262713	0.0298436	0.0110893	0.0343089
cg00636639	0.0257804	0.0223676	0.0260079	0.0255528	0.0361323	0.0229364	0.0305582	0.0296481	0.0269179	0.0270317	0.0210025	0.0270317	0.0192962	0.0230502	0.0202062	0.0288518	0.0288518	0.0257804	0.0260079	0.0246428	0.0196374	0.027828	0.0254391	0.0302169	0.0306719	0.0255528	0.0231639	0.0217988	0.0263491	0.0154284	0.0213438	0.0199787	0.0219126	0.0261216	0.0280555	0.0271454	0.0382937	0.027373	0.0321508	0.027373	0.0361323	0.024984	0.0268042	0.0295344	0.023619	0.0263491	0.0322645	0.0167935	0.031582
cg00638514	0.307599	0.671286	0.438174	0.293892	0.512584	0.764388	0.4744	0.460515	0.683213	0.449033	0.655353	0.661584	0.544449	0.235324	0.356553	0.519082	0.598299	0.118902	0.676092	0.600435	0.479918	0.121572	0.421796	0.140442	0.72113	0.7813	0.394471	0.659715	0.755665	0.407021	0.872088	0.378004	0.386994	0.117478	0.115163	0.39634	0.505375	0.610048	0.813254	0.145782	0.717392	0.578895	0.122017	0.3918	0.643159	0.360648	0.715434	0.248675	0.481788
cg00642303	0.0496943	0.0485885	0.0439442	0.0585406	0.0556655	0.0649541	0.0514636	0.0428384	0.0556655	0.0457135	0.0390788	0.04505	0.0417326	0.0505789	0.0401845	0.0477039	0.052127	0.0514636	0.0494731	0.0512424	0.0426173	0.0565502	0.0525693	0.056329	0.0459346	0.0623002	0.0404057	0.0395211	0.0501366	0.0401845	0.0388576	0.0448288	0.0412903	0.0441654	0.0452712	0.0565502	0.0704831	0.0550021	0.042175	0.0530116	0.0618579	0.0574348	0.0538963	0.0468193	0.0576559	0.0525693	0.0525693	0.0381941	0.047925
cg00644033	0.858308	0.858448	0.874225	0.869617	0.841694	0.856074	0.753175	0.870595	0.886651	0.862497	0.893771	0.69663	0.892236	0.774258	0.889443	0.690766	0.822705	0.862357	0.876179	0.512892	0.863474	0.645529	0.844346	0.865289	0.862357	0.711011	0.754432	0.898658	0.888605	0.896564	0.873666	0.875481	0.815445	0.874783	0.87953	0.695373	0.842112	0.71478	0.899775	0.798412	0.767416	0.845044	0.861519	0.392401	0.768254	0.755549	0.851886	0.824102	0.591357
cg00645579	0.736034	0.806047	0.846412	0.664459	0.564484	0.758505	0.768492	0.764226	0.854006	0.735826	0.775046	0.805527	0.798349	0.802614	0.698894	0.5262	0.586123	0.67351	0.804279	0.784201	0.453586	0.71918	0.536708	0.808856	0.810521	0.793251	0.73593	0.719909	0.670597	0.842979	0.92995	0.7429	0.606201	0.867843	0.691404	0.664459	0.770156	0.710962	0.840586	0.768804	0.855047	0.689427	0.426433	0.753303	0.788986	0.844956	0.64719	0.87294	0.671117
cg00645922	0.0291796	0.0329393	0.0298062	0.0300747	0.0302538	0.0310594	0.02909	0.0280158	0.0301643	0.02909	0.02909	0.0295376	0.0290005	0.028911	0.0282844	0.0302538	0.0298062	0.0308804	0.0298062	0.0309699	0.0283739	0.0307909	0.028911	0.0296271	0.0298062	0.0286424	0.0279263	0.0290005	0.02909	0.0280158	0.0294481	0.028732	0.0286424	0.0292691	0.0320441	0.0304328	0.0294481	0.0295376	0.0301643	0.0286424	0.0323127	0.0312385	0.0340135	0.02909	0.0299852	0.0331184	0.0306118	0.0262255	0.0294481
cg00646140	0.0848768	0.041844	0.1523	0.0446474	0.092306	0.0545997	0.0447876	0.0464697	0.0602065	0.0466098	0.0453483	0.0450679	0.0642715	0.04675	0.0747844	0.0529176	0.0681964	0.0438064	0.0501141	0.0473107	0.0421243	0.0488526	0.0482919	0.0424047	0.0700186	0.0484321	0.108566	0.0585245	0.0489928	0.0454885	0.0393209	0.054039	0.0484321	0.0397414	0.0648322	0.0865589	0.0389004	0.0515159	0.058104	0.0422645	0.0538988	0.0997351	0.0501141	0.0738032	0.166037	0.0545997	0.0480116	0.0394611	0.0717007
cg00646492	0.0745475	0.0846392	0.0741009	0.069189	0.0665991	0.0941951	0.0513276	0.123488	0.0808883	0.0983925	0.0507024	0.0537389	0.0411465	0.044183	0.0502559	0.0712431	0.068296	0.0770481	0.0617765	0.0667777	0.0488269	0.0990177	0.103662	0.1426	0.0534709	0.0955347	0.0795487	0.0672243	0.0707073	0.0523992	0.0674922	0.103304	0.048559	0.0606155	0.0908014	0.0924983	0.0757978	0.0766015	0.0902656	0.0709752	0.133312	0.129918	0.0632947	0.0748154	0.0594545	0.0618658	0.261379	0.0293579	0.0750833
cg00648153	0.0384916	0.0438404	0.0471319	0.0273828	0.0613265	0.0339658	0.0489833	0.0740811	0.0500119	0.0578293	0.0341715	0.0232684	0.0203883	0.0255313	0.0370516	0.0596808	0.0440461	0.0446632	0.0319086	0.0358173	0.0356116	0.0588579	0.0409603	0.0452804	0.0329372	0.0539206	0.115842	0.0314972	0.044869	0.0282057	0.0368459	0.042606	0.02944	0.0479547	0.052892	0.0368459	0.0471319	0.0428118	0.0496005	0.0380802	0.0438404	0.0541263	0.0323201	0.0516577	0.034583	0.0539206	0.0559778	0.0101023	0.0456918
cg00648883	0.302645	0.182084	0.261802	0.461466	0.397618	0.289974	0.260571	0.176056	0.351731	0.295264	0.433663	0.182453	0.321344	0.494067	0.152681	0.207795	0.285791	0.60737	0.171504	0.221697	0.124386	0.287636	0.199307	0.391713	0.241503	0.174579	0.197215	0.156618	0.281116	0.218129	0.191064	0.587071	0.194632	0.686104	0.583381	0.401554	0.140133	0.194263	0.282223	0.493575	0.454577	0.183191	0.309657	0.204351	0.187004	0.168182	0.184913	0.226002	0.243471
cg00650762	0.016528	0.0159864	0.0142715	0.014452	0.0145423	0.0161669	0.0149033	0.0133689	0.0132786	0.0142715	0.0156254	0.014813	0.0295254	0.014813	0.0147228	0.0141812	0.0164377	0.0136397	0.014091	0.014452	0.0145423	0.0130981	0.014452	0.0145423	0.0135494	0.014091	0.014452	0.014813	0.0152643	0.0149033	0.0150838	0.0132786	0.0195066	0.0156254	0.0146325	0.0166182	0.0158059	0.014091	0.0147228	0.016528	0.0157156	0.0155351	0.0164377	0.0335871	0.0150838	0.0142715	0.0164377	0.0137299	0.0150838
cg00650876	0.0331751	0.0237963	0.0312994	0.0301739	0.0309242	0.0388024	0.0260473	0.0320497	0.027923	0.025297	0.0241715	0.025297	0.0207951	0.0335503	0.0177939	0.0267976	0.0256721	0.0331751	0.0222957	0.0320497	0.0192945	0.0294236	0.0245467	0.0493066	0.023046	0.0312994	0.0358012	0.0211703	0.0211703	0.0162933	0.0219206	0.0290485	0.0237963	0.0350509	0.0264224	0.0222957	0.0376769	0.0282982	0.0174188	0.0309242	0.0369266	0.0343006	0.0369266	0.0211703	0.0335503	0.0264224	0.0301739	0.0177939	0.0226709
cg00651216	0.0703399	0.0660991	0.127791	0.0616983	0.147715	0.0738606	0.0750609	0.0713801	0.119389	0.0616183	0.111068	0.0670593	0.0775413	0.0597779	0.0578575	0.0667393	0.148435	0.0585777	0.0624984	0.0885035	0.0544169	0.0878633	0.0972252	0.0721003	0.0658591	0.0680995	0.0744207	0.0982654	0.0529766	0.0783415	0.154276	0.152516	0.0753809	0.0579375	0.0950647	0.0824223	0.0678595	0.0899437	0.0753809	0.0741007	0.0827423	0.12483	0.0685796	0.105227	0.0892236	0.0829824	0.282781	0.0667393	0.115789
cg00653387	0.167502	0.0851324	0.6142	0.822475	0.249361	0.691869	0.497186	0.233827	0.613281	0.368419	0.692891	0.362185	0.591002	0.439037	0.301583	0.100053	0.183036	0.157078	0.32192	0.585177	0.374551	0.536327	0.380683	0.0639779	0.316913	0.7631	0.226469	0.625646	0.606536	0.229535	0.427897	0.555131	0.0898334	0.0669415	0.0709272	0.271435	0.716805	0.266121	0.0937168	0.179766	0.356973	0.594476	0.278794	0.511698	0.486353	0.296371	0.733463	0.223301	0.0869719
cg00654814	0.439655	0.700174	0.586834	0.641629	0.53473	0.732186	0.156832	0.695079	0.624133	0.613847	0.639611	0.651627	0.570107	0.0601228	0.699886	0.565204	0.648551	0.453113	0.563666	0.560493	0.792654	0.59885	0.121455	0.433118	0.234123	0.714306	0.651531	0.644033	0.752086	0.549438	0.812746	0.434752	0.462438	0.0586809	0.0758886	0.479069	0.541267	0.634804	0.699597	0.547708	0.65528	0.647301	0.639995	0.474359	0.628459	0.0758886	0.712287	0.732283	0.633747
cg00655307	0.294458	0.344481	0.578475	0.447556	0.410918	0.589125	0.35855	0.425475	0.62674	0.358843	0.433096	0.54301	0.35728	0.462113	0.247464	0.190309	0.433291	0.332171	0.442378	0.204964	0.514872	0.525033	0.461332	0.381607	0.491619	0.675786	0.381119	0.633383	0.763033	0.265734	0.699429	0.482142	0.196073	0.283906	0.32074	0.173309	0.418343	0.360699	0.486343	0.301102	0.481849	0.467682	0.596941	0.455079	0.508424	0.209165	0.529136	0.315366	0.440912
cg00657095	0.0313696	0.0462875	0.0465859	0.0629955	0.0719462	0.0456908	0.0322647	0.0468842	0.0403204	0.0522547	0.0310713	0.0203304	0.0215238	0.0259992	0.0239107	0.0465859	0.0325631	0.0728413	0.0325631	0.0388286	0.0251041	0.044199	0.0444974	0.0349499	0.0167501	0.0364417	0.0621005	0.0301762	0.0313696	0.0265959	0.0209271	0.0379335	0.0421105	0.0236123	0.0430056	0.0468842	0.0507629	0.0495694	0.0236123	0.0280877	0.0406187	0.0304746	0.0662775	0.0373368	0.0522547	0.0322647	0.0409171	0.0173468	0.0307729
cg00657582	0.0836508	0.0764722	0.0809472	0.081693	0.325021	0.311969	0.0771248	0.0936263	0.315232	0.0965164	0.083744	0.116374	0.137537	0.0974487	0.0733024	0.0832779	0.0831847	0.077218	0.0964232	0.0912956	0.0749805	0.0942789	0.384315	0.0972623	0.210349	0.178092	0.0769383	0.371915	0.0815998	0.0733024	0.126536	0.0760992	0.261439	0.0753534	0.0997795	0.0829982	0.0776841	0.5167	0.0821591	0.0788029	0.237759	0.436617	0.0743279	0.0851425	0.0774977	0.0835576	0.463094	0.103322	0.189186
cg00658007	0.596597	0.242633	0.75976	0.496209	0.537206	0.47928	0.674655	0.20429	0.652144	0.289304	0.183151	0.419981	0.262949	0.224606	0.308704	0.194499	0.370382	0.471044	0.526682	0.161829	0.378893	0.159542	0.225429	0.552946	0.368094	0.432335	0.326091	0.519087	0.336157	0.169059	0.148194	0.591014	0.368643	0.822079	0.553312	0.465919	0.272832	0.377886	0.197152	0.494105	0.550475	0.425746	0.512681	0.334968	0.637227	0.440662	0.271093	0.255079	0.207219
cg00658626	0.0304794	0.368282	0.0662825	0.0255565	0.438187	0.22668	0.0265411	0.304463	0.566631	0.200365	0.472737	0.0190224	0.0255565	0.0225132	0.0574213	0.0538409	0.0328066	0.0528564	0.0260935	0.0270781	0.0243034	0.0466803	0.23411	0.0152631	0.0249299	0.647367	0.4304	0.511315	0.176556	0.0336122	0.750569	0.166173	0.095283	0.020365	0.0296738	0.17038	0.447317	0.359778	0.0234083	0.0234083	0.3468	0.494398	0.0237663	0.0311955	0.0271676	0.0197385	0.565915	0.014726	0.0271676
cg00659129	0.902398	0.952082	0.872762	0.945399	0.80981	0.853683	0.869663	0.653301	0.880026	0.835765	0.930097	0.834894	0.949176	0.9546	0.939879	0.91063	0.750054	0.925158	0.932421	0.927095	0.958764	0.89833	0.931453	0.718578	0.754024	0.919153	0.94937	0.885159	0.942591	0.921865	0.948402	0.91741	0.833829	0.93	0.895715	0.925061	0.918088	0.791893	0.934068	0.883319	0.72187	0.921962	0.948111	0.872568	0.784919	0.914407	0.933487	0.966416	0.601971
cg00659953	0.0357054	0.0299951	0.0305143	0.0403775	0.0346672	0.0419349	0.0273995	0.0227275	0.0245444	0.0250635	0.020651	0.035965	0.0268804	0.0281782	0.0203914	0.031812	0.0297356	0.0320716	0.0315525	0.0344076	0.0227275	0.0289569	0.0258422	0.0403775	0.0245444	0.0284378	0.0224679	0.0214297	0.0235062	0.0227275	0.0222084	0.194037	0.024804	0.024804	0.02714	0.0312929	0.0240253	0.0281782	0.022987	0.0328503	0.0354459	0.0302547	0.0398584	0.0302547	0.0289569	0.0253231	0.0458282	0.0198723	0.0263613
cg00660989	0.0614434	0.0801531	0.604672	0.738326	0.514366	0.485746	0.662747	0.0851547	0.695442	0.531594	0.647834	0.0701499	0.44351	0.0812646	0.047828	0.548451	0.627643	0.0614434	0.682475	0.224922	0.722858	0.0968251	0.622363	0.763983	0.0718171	0.748793	0.0557935	0.662191	0.0590352	0.630699	0.0492173	0.302261	0.334216	0.483615	0.317729	0.333845	0.0968251	0.416001	0.0765408	0.058109	0.0556082	0.664969	0.442584	0.114238	0.559195	0.125631	0.653484	0.0556082	0.082376
cg00661202	0.031952	0.0271826	0.0354898	0.0250338	0.0475443	0.0339175	0.0328692	0.0229112	0.0344416	0.0278378	0.0184562	0.0276281	0.0229112	0.0276281	0.0208147	0.0282309	0.0328692	0.0295673	0.0292005	0.0294625	0.0213388	0.0304845	0.0373242	0.0388965	0.0347036	0.0265799	0.0239594	0.0187183	0.0336554	0.0195044	0.0234353	0.0370621	0.0218629	0.0349657	0.0286764	0.0402068	0.0339175	0.0368001	0.0273661	0.0381103	0.0299866	0.0370621	0.0257151	0.036276	0.031559	0.031821	0.0409929	0.0179321	0.0352277
cg00661485	0.670513	0.623334	0.761763	0.86933	0.624667	0.848683	0.758765	0.806055	0.724242	0.712364	0.803613	0.749441	0.830477	0.777415	0.809386	0.697044	0.683723	0.812716	0.776749	0.494453	0.889201	0.759542	0.716471	0.291862	0.684389	0.81538	0.647756	0.652863	0.883206	0.598246	0.911292	0.684389	0.337486	0.859451	0.537525	0.643538	0.756989	0.669181	0.835251	0.688941	0.836583	0.673955	0.651531	0.631216	0.686388	0.48757	0.782077	0.885094	0.379004
cg00662556	0.518627	0.602921	0.645565	0.748633	0.529692	0.68734	0.703253	0.714567	0.690323	0.567612	0.714816	0.623435	0.627414	0.68821	0.624305	0.538519	0.564255	0.6069	0.637857	0.567115	0.754849	0.604413	0.645317	0.683734	0.677145	0.734957	0.613613	0.65029	0.694799	0.570596	0.849836	0.466036	0.31734	0.824224	0.348671	0.423143	0.624057	0.580418	0.627787	0.630024	0.66869	0.627662	0.503583	0.624181	0.627165	0.496994	0.724638	0.764298	0.564877
cg00665395	0.0577606	0.0403677	0.0545397	0.0603373	0.0716104	0.0574385	0.0590489	0.0509967	0.0497083	0.0519629	0.0339259	0.0455211	0.030705	0.0551838	0.0400456	0.055828	0.0613036	0.04842	0.0506746	0.0571164	0.0381131	0.0567943	0.0551838	0.0600152	0.0538955	0.0516409	0.0799848	0.0371468	0.0793406	0.0387573	0.0403677	0.0439107	0.0429444	0.0603373	0.0584047	0.0564722	0.0538955	0.0674233	0.0416561	0.0638803	0.0551838	0.0671012	0.0545397	0.0635582	0.0564722	0.0619477	0.0526071	0.0297387	0.0793406
cg00666446	0.0581884	0.0703316	0.0489365	0.0474909	0.0668621	0.0645491	0.0594895	0.062959	0.0626698	0.0680186	0.051394	0.043154	0.0487919	0.050093	0.0448888	0.0482137	0.0467681	0.0531288	0.0532733	0.0620916	0.044166	0.0522614	0.0406965	0.0519723	0.0605014	0.0357814	0.0565983	0.0677295	0.04778	0.0482137	0.0392509	0.0430095	0.0555863	0.0434432	0.0694642	0.0512495	0.0541407	0.0461898	0.0460453	0.0451779	0.0668621	0.0512495	0.0490811	0.046479	0.0474909	0.0443105	0.0473463	0.0344803	0.0628144
cg00666746	0.221448	0.539343	0.180268	0.107643	0.551921	0.304324	0.167259	0.65823	0.659178	0.344815	0.592411	0.498766	0.471887	0.124701	0.149081	0.190003	0.536241	0.143826	0.422523	0.20439	0.422178	0.67167	0.277273	0.0978219	0.146841	0.721378	0.433722	0.68218	0.362648	0.230321	0.325345	0.440442	0.154853	0.137451	0.157524	0.427433	0.173117	0.514704	0.141414	0.301826	0.273741	0.612743	0.170274	0.4096	0.35903	0.155026	0.619032	0.497387	0.43131
cg00668685	0.403004	0.273693	0.351774	0.186996	0.567873	0.25014	0.308701	0.25793	0.727336	0.427198	0.687837	0.361672	0.312642	0.252798	0.326755	0.434988	0.384675	0.289456	0.381376	0.377618	0.207158	0.308334	0.39888	0.22787	0.293396	0.36323	0.432605	0.467155	0.239876	0.367995	0.149055	0.443328	0.58327	0.208533	0.467064	0.464406	0.303386	0.345726	0.339769	0.257288	0.239509	0.410335	0.320615	0.435263	0.402087	0.34261	0.509679	0.282399	0.393931
cg00669623	0.0758706	0.0813673	0.121218	0.0941929	0.0919026	0.0877801	0.135876	0.0644191	0.0877801	0.0722061	0.0493032	0.0905284	0.0644191	0.100606	0.0644191	0.0923607	0.176643	0.115264	0.0511355	0.141373	0.105644	0.0978574	0.0680836	0.0703739	0.101522	0.10656	0.125341	0.0584644	0.178017	0.0442646	0.130379	0.118928	0.0575483	0.0483871	0.132212	0.208707	0.0616708	0.0964832	0.105186	0.0479291	0.114805	0.162443	0.112973	0.102896	0.142289	0.133128	0.216494	0.0369357	0.100148
cg00669856	0.0549787	0.0915917	0.101808	0.0455855	0.0754793	0.0726682	0.0529218	0.0912489	0.0662917	0.136295	0.0430487	0.0437343	0.0317356	0.0377692	0.0292673	0.0941286	0.0554587	0.0802102	0.0431858	0.0710226	0.0367408	0.138078	0.0551159	0.0736281	0.0769191	0.114629	0.133347	0.0399633	0.0688286	0.038592	0.0796617	0.0474367	0.0357123	0.0600524	0.0829527	0.0502478	0.0784275	0.0599839	0.0383178	0.0660175	0.072531	0.064372	0.0749993	0.0728739	0.0494251	0.0560072	0.0651262	0.0359866	0.0791817
cg00671161	0.0134833	0.0136116	0.0124568	0.0130983	0.0136116	0.015023	0.0165627	0.0123284	0.0133549	0.0128417	0.0102755	0.0106604	0.010917	0.0105321	0.00924896	0.0111736	0.010917	0.0100188	0.0116869	0.0193856	0.00937727	0.0134833	0.0111736	0.0130983	0.0123284	0.0120718	0.0123284	0.0107887	0.0110453	0.0100188	0.0106604	0.0105321	0.0110453	0.0106604	0.0106604	0.0141248	0.0124568	0.0132266	0.00937727	0.0132266	0.0146381	0.0132266	0.0133549	0.00976221	0.0119435	0.0123284	0.0134833	0.00822246	0.010917
cg00672638	0.0500002	0.134443	0.0918064	0.0970668	0.126137	0.102604	0.138873	0.076579	0.10648	0.0599673	0.0787939	0.0801782	0.0721492	0.135827	0.0458473	0.107034	0.0621821	0.129736	0.0751947	0.0635665	0.0657814	0.120877	0.101773	0.0956825	0.0718723	0.0610747	0.115617	0.0754715	0.128352	0.0358803	0.0585829	0.0616284	0.080455	0.0848848	0.13472	0.102881	0.0671657	0.080455	0.0990048	0.0754715	0.0879303	0.0574755	0.133059	0.0801782	0.096513	0.0715955	0.104542	0.0447398	0.0691037
cg00673191	0.198937	0.0711432	0.191882	0.128664	0.382759	0.116726	0.215352	0.15349	0.582725	0.107636	0.121609	0.174382	0.140602	0.125001	0.149149	0.209112	0.14725	0.122016	0.164886	0.190526	0.0708718	0.163122	0.217794	0.0790116	0.170583	0.128528	0.27328	0.241806	0.0847094	0.193375	0.0840311	0.312757	0.305974	0.103702	0.331614	0.251574	0.132055	0.140331	0.127714	0.095698	0.150912	0.150099	0.114691	0.241942	0.196224	0.254016	0.143858	0.0916281	0.27138
cg00676660	0.0444174	0.0374682	0.046818	0.0345621	0.221307	0.0393634	0.0450491	0.0444174	0.0480815	0.0602111	0.350183	0.0436593	0.0968524	0.0391107	0.0295082	0.0405006	0.0407533	0.0401215	0.035952	0.0370891	0.0307717	0.0609692	0.0420168	0.0463126	0.0972315	0.690821	0.044291	0.0324142	0.0412587	0.0311507	0.0335513	0.0447964	0.0345621	0.0431539	0.0545254	0.044291	0.0421431	0.041006	0.0316561	0.0426485	0.0488396	0.509257	0.0744886	0.0583158	0.0444174	0.038479	0.043912	0.0273602	0.0506085
cg00677811	0.0355289	0.0236105	0.0424639	0.0219816	0.0342387	0.0289166	0.0335936	0.0326259	0.0350451	0.0429477	0.0200463	0.0290778	0.0273038	0.0231106	0.0235944	0.0319002	0.0300455	0.0269812	0.028594	0.0248846	0.028594	0.0340936	0.0384319	0.0298842	0.0305293	0.0208527	0.0179497	0.023917	0.039077	0.0229493	0.037303	0.0255297	0.0240782	0.0369804	0.0339	0.036174	0.0248846	0.031497	0.0274651	0.0313357	0.0266587	0.0340774	0.0287553	0.0331098	0.0295617	0.029723	0.0345613	0.0161757	0.0479473
cg00678539	0.160959	0.762555	0.315722	0.164958	0.646507	0.154328	0.154328	0.164665	0.75924	0.220251	0.695364	0.398906	0.0820663	0.680054	0.0860646	0.13775	0.183291	0.118051	0.078068	0.153938	0.0480321	0.140773	0.180561	0.575806	0.174319	0.565664	0.604379	0.555327	0.143698	0.0891852	0.0655856	0.229028	0.0881125	0.162422	0.230003	0.360191	0.184949	0.095524	0.0994247	0.0952314	0.142918	0.701801	0.167493	0.231953	0.522853	0.104593	0.332983	0.0256027	0.619397
cg00679556	0.528603	0.201252	0.181287	0.179043	0.398537	0.222516	0.179633	0.242127	0.230313	0.409523	0.620748	0.267289	0.212239	0.199952	0.169237	0.313716	0.242599	0.186367	0.316197	0.241181	0.177271	0.281702	0.251223	0.264808	0.168765	0.227832	0.437758	0.215783	0.172191	0.238701	0.166166	0.358607	0.361561	0.167938	0.319741	0.489382	0.256539	0.263863	0.335925	0.184713	0.191565	0.244253	0.328601	0.331082	0.239882	0.226651	0.389559	0.160259	0.233148
cg00679738	0.0347491	0.0342545	0.0352438	0.0315694	0.0392714	0.0306509	0.0309335	0.0311455	0.0331946	0.0361623	0.0257753	0.029167	0.0278951	0.0290257	0.032488	0.0367983	0.0307922	0.0295203	0.029591	0.0279658	0.0305802	0.0381408	0.0314988	0.0319934	0.0319934	0.0281071	0.0330533	0.0275418	0.0311455	0.0294496	0.0327	0.0305095	0.0288137	0.0336186	0.0473266	0.0337599	0.0304389	0.0331946	0.0278951	0.0314281	0.0295203	0.0325587	0.0305802	0.0325587	0.0297323	0.0365156	0.0356677	0.0249274	0.0372222
cg00682653	0.0183454	0.018771	0.0175795	0.024388	0.0192816	0.0174944	0.0163029	0.0131539	0.0150262	0.0146858	0.0109411	0.0178348	0.0135794	0.0203029	0.0118773	0.0151965	0.0253242	0.0229412	0.0135794	0.0254093	0.0137496	0.0123879	0.0134092	0.0193667	0.0153667	0.0230263	0.0219199	0.0118773	0.0168135	0.0105156	0.0144305	0.0146858	0.0119624	0.0141752	0.014856	0.0178348	0.017239	0.0202178	0.0135794	0.0197071	0.0200476	0.0157922	0.0208986	0.0159624	0.0164731	0.0146007	0.015622	0.0107709	0.0146007
cg00685836	0.0547548	0.642971	0.527161	0.0647911	0.486666	0.483786	0.0538821	0.651	0.614782	0.318929	0.587204	0.561546	0.540164	0.399132	0.380019	0.112267	0.288558	0.368587	0.409605	0.173445	0.344063	0.561197	0.504994	0.327219	0.495917	0.657109	0.160354	0.581008	0.616091	0.261067	0.479335	0.237329	0.266391	0.180951	0.346507	0.352354	0.371641	0.433343	0.523757	0.0693293	0.545401	0.622986	0.304354	0.440761	0.416586	0.0866092	0.622113	0.554564	0.167162
cg00686022	0.8909	0.526256	0.902446	0.91815	0.894364	0.890091	0.802683	0.911915	0.902562	0.913647	0.90822	0.824737	0.890438	0.896788	0.891362	0.895634	0.884087	0.905448	0.894826	0.880392	0.9021	0.842057	0.853373	0.871039	0.630522	0.904987	0.858915	0.90464	0.889399	0.843327	0.892863	0.896096	0.860878	0.883163	0.876582	0.87866	0.769544	0.897019	0.89598	0.875312	0.886512	0.910298	0.908681	0.88605	0.895865	0.859724	0.897712	0.900022	0.721972
cg00686623	0.0463059	0.0442315	0.045363	0.0595068	0.0627127	0.0564895	0.0517749	0.0357452	0.0529064	0.0438543	0.0400826	0.038574	0.036311	0.0421571	0.0355566	0.0380082	0.0570552	0.0579981	0.036311	0.0534721	0.036311	0.0466831	0.0512091	0.0414027	0.0564895	0.0653529	0.0438543	0.0344251	0.0679931	0.0306534	0.0387626	0.0406484	0.035368	0.0472488	0.0429114	0.0459287	0.0480032	0.0523406	0.0378196	0.0464945	0.0617698	0.0679931	0.0497004	0.052152	0.0481918	0.0500776	0.0630899	0.030842	0.0444201
cg00687686	0.463332	0.596381	0.294555	0.0886539	0.653229	0.795768	0.162715	0.781254	0.705146	0.723382	0.724685	0.771113	0.522506	0.0629745	0.500362	0.274737	0.772136	0.0707899	0.757715	0.648019	0.344611	0.787488	0.0546938	0.142897	0.394388	0.823588	0.455144	0.728779	0.797815	0.52446	0.873272	0.604755	0.414206	0.0761863	0.461192	0.578982	0.525111	0.717428	0.757994	0.0586946	0.506131	0.740781	0.482777	0.668953	0.760041	0.0650214	0.748503	0.45226	0.561304
cg00688421	0.0478031	0.051406	0.0490041	0.0442001	0.0433995	0.0397965	0.051406	0.0417981	0.0377949	0.0323904	0.029388	0.0289876	0.0305889	0.0431993	0.0468022	0.0313896	0.0478031	0.0361935	0.0331911	0.0253847	0.0307891	0.042799	0.0646169	0.0464019	0.0333912	0.0341919	0.0530073	0.0359934	0.0383954	0.0361935	0.0289876	0.0586119	0.0351927	0.0456013	0.0442001	0.050205	0.0496045	0.0484036	0.040397	0.0421985	0.0361935	0.0405972	0.0504052	0.0500049	0.0359934	0.0596128	0.0450008	0.0309893	0.0365939
cg00689340	0.235559	0.0959586	0.367514	0.104309	0.321177	0.0974875	0.163348	0.161701	0.187575	0.228973	0.159467	0.157585	0.18487	0.117363	0.173462	0.201805	0.15241	0.0780822	0.155468	0.154409	0.0813752	0.149352	0.185575	0.0821985	0.110189	0.131711	0.263079	0.254258	0.0730251	0.197807	0.0686737	0.293421	0.289776	0.0880789	0.242615	0.290481	0.143354	0.345874	0.162642	0.0859619	0.0943121	0.208274	0.171227	0.213684	0.230149	0.181106	0.0879613	0.0777294	0.225562
cg00690049	0.303521	0.0898863	0.420118	0.459233	0.378851	0.303615	0.0795929	0.100367	0.202459	0.0885763	0.100367	0.0824002	0.350216	0.0730426	0.599317	0.0905414	0.320084	0.217805	0.0850203	0.0792186	0.0903542	0.0956881	0.530257	0.189077	0.360416	0.0826809	0.383342	0.0852075	0.0848332	0.0868919	0.135832	0.178035	0.101677	0.0790315	0.355644	0.397847	0.0964367	0.089512	0.439394	0.0978403	0.338987	0.574706	0.488241	0.0890441	0.096811	0.116556	0.300153	0.0882019	0.428072
cg00690280	0.861797	0.299966	0.823438	0.880124	0.555368	0.755342	0.839698	0.708717	0.753456	0.822359	0.304457	0.824066	0.782742	0.539557	0.748694	0.373361	0.749503	0.905457	0.792893	0.21552	0.879944	0.186503	0.761631	0.828019	0.478379	0.720037	0.230702	0.831253	0.790737	0.673412	0.720845	0.720935	0.538389	0.878776	0.814184	0.661284	0.470653	0.834218	0.848591	0.395551	0.772052	0.559321	0.775914	0.787952	0.791276	0.37974	0.832331	0.448643	0.344075
cg00691625	0.806367	0.843235	0.85872	0.791619	0.717881	0.858997	0.746547	0.722213	0.860564	0.813372	0.860287	0.753736	0.850978	0.718618	0.668016	0.85107	0.812081	0.760649	0.568008	0.795675	0.746086	0.493902	0.754566	0.778346	0.708479	0.604232	0.812173	0.749865	0.607735	0.597596	0.843789	0.833465	0.715853	0.833004	0.794753	0.769498	0.809777	0.679814	0.602573	0.705899	0.803786	0.566257	0.824893	0.727928	0.795214	0.786734	0.82305	0.817888	0.628197
cg00692549	0.0599762	0.0582455	0.0663903	0.0591618	0.0814582	0.0653722	0.10966	0.0861414	0.0653722	0.0910283	0.0382907	0.0576346	0.0432794	0.0508133	0.04725	0.0826799	0.0940826	0.0757568	0.048879	0.0485735	0.0449084	0.0677138	0.0573292	0.0623179	0.06975	0.0439921	0.087974	0.0495916	0.0664921	0.0547839	0.0496934	0.0443993	0.0526459	0.0789129	0.0720916	0.0526459	0.0754514	0.0658812	0.051526	0.063336	0.0550894	0.0511188	0.0684265	0.0532568	0.0512206	0.0593654	0.0609943	0.0337093	0.0689355
cg00695416	0.0591265	0.0489265	0.0585083	0.768489	0.0563447	0.0575811	0.0532538	0.060775	0.0542841	0.0708719	0.0494417	0.0580962	0.0569629	0.0648962	0.0499568	0.0629386	0.0561386	0.0577871	0.0584053	0.0553144	0.0477932	0.0639689	0.0579932	0.0567568	0.0552114	0.241387	0.077878	0.050575	0.0560356	0.0476902	0.0468659	0.0697386	0.0485144	0.0527386	0.113011	0.0545932	0.0567568	0.057272	0.0518114	0.0557265	0.0566538	0.0697386	0.0562417	0.0627326	0.0507811	0.0565508	0.0725204	0.0444962	0.0587144
cg00698688	0.360367	0.237713	0.2804	0.128292	0.465646	0.207798	0.263832	0.263371	0.371527	0.436306	0.227358	0.324123	0.310661	0.243236	0.250025	0.355074	0.362438	0.236908	0.346329	0.299615	0.146701	0.310661	0.344718	0.205842	0.209063	0.314458	0.482905	0.384644	0.188353	0.31952	0.0816924	0.39592	0.587839	0.133124	0.448272	0.431358	0.383609	0.383954	0.313307	0.216197	0.191114	0.380272	0.320211	0.402708	0.354499	0.336204	0.28903	0.201469	0.411568
cg00702231	0.624108	0.689206	0.605845	0.742227	0.636479	0.546932	0.676098	0.69171	0.875812	0.66785	0.673152	0.572117	0.672858	0.712624	0.719988	0.571086	0.598481	0.608938	0.629999	0.747677	0.684788	0.544281	0.600543	0.623813	0.638247	0.713507	0.617038	0.640603	0.656215	0.917198	0.516298	0.629557	0.637952	0.636479	0.646347	0.574179	0.456649	0.610116	0.577861	0.573001	0.668734	0.61041	0.654006	0.624402	0.686997	0.632208	0.926035	0.721902	0.591117
cg00702729	0.96281	0.978703	0.943915	0.947805	0.979815	0.961921	0.95992	0.947139	0.958031	0.920464	0.960031	0.95703	0.951695	0.948472	0.955586	0.940803	0.960254	0.962143	0.951918	0.941248	0.94536	0.915907	0.917463	0.95892	0.954363	0.85689	0.936913	0.968145	0.945916	0.912351	0.929356	0.968145	0.937358	0.965144	0.940248	0.940915	0.938469	0.931467	0.942693	0.921687	0.937803	0.982149	0.953363	0.924243	0.954252	0.940692	0.959698	0.951029	0.966589
cg00704310	0.0301369	0.033869	0.0394216	0.0331408	0.0444281	0.0298638	0.037237	0.174961	0.0403319	0.0435178	0.0249483	0.0299548	0.0217624	0.0312292	0.0213072	0.0355985	0.0293176	0.0350523	0.0335959	0.0312292	0.0230368	0.0325946	0.0260407	0.0363267	0.0354164	0.418913	0.0605399	0.0292266	0.0248573	0.0201239	0.0193047	0.0313202	0.0209431	0.0293176	0.0301369	0.0284984	0.0332318	0.0275881	0.0229457	0.0275881	0.301033	0.0331408	0.0417883	0.0358716	0.0292266	0.0325036	0.0341421	0.0194867	0.0530757
cg00704909	0.0535887	0.0463949	0.0600632	0.0510709	0.0503515	0.0561066	0.0528694	0.0640198	0.0604229	0.0514306	0.0615019	0.0561066	0.0402802	0.047474	0.0478337	0.0679764	0.0467546	0.041719	0.0449562	0.0413593	0.0413593	0.056826	0.0561066	0.0528694	0.0431577	0.0535887	0.056826	0.0456755	0.0467546	0.0374027	0.0334461	0.0471143	0.0388414	0.0615019	0.056826	0.0496321	0.0503515	0.0467546	0.047474	0.0611422	0.056826	0.0517903	0.0575453	0.0499918	0.0557469	0.0557469	0.0413593	0.0348848	0.0575453
cg00707317	0.0820738	0.818732	0.0719026	0.0631441	0.29548	0.763732	0.0643684	0.81035	0.675676	0.336636	0.688861	0.0687005	0.228614	0.0638033	0.134625	0.0773649	0.50286	0.0685122	0.0678529	0.0738803	0.0582468	0.743766	0.492218	0.0740687	0.0663461	0.814494	0.0828272	0.4828	0.534598	0.0686064	0.885881	0.136979	0.0622965	0.0616372	0.0807553	0.368939	0.0777416	0.564358	0.061543	0.0663461	0.717585	0.590351	0.0630499	0.0882895	0.286251	0.530925	0.676335	0.0544797	0.0719026
cg00708598	0.612339	0.743018	0.734469	0.822291	0.478552	0.664411	0.506975	0.753565	0.694943	0.658082	0.665188	0.717038	0.472668	0.412713	0.773106	0.351871	0.700939	0.633768	0.665188	0.611007	0.797199	0.637209	0.68051	0.701494	0.675514	0.785097	0.605345	0.73891	0.777214	0.727474	0.813742	0.627217	0.409049	0.589801	0.391729	0.438027	0.699273	0.617891	0.373632	0.54539	0.702382	0.673959	0.21664	0.629438	0.714817	0.623553	0.740353	0.808635	0.394838
cg00708642	0.0287392	0.0266412	0.0312789	0.0335978	0.0279662	0.0359166	0.0248744	0.0260891	0.0259786	0.0299538	0.0223347	0.0237702	0.0236598	0.0327144	0.0202367	0.048063	0.0282975	0.0278558	0.0244327	0.0320518	0.0253161	0.0245431	0.0248744	0.0312789	0.034702	0.0302851	0.0286288	0.0221139	0.0267516	0.0203471	0.0223347	0.0249848	0.0208992	0.0258682	0.0280767	0.0277454	0.0312789	0.0281871	0.0227764	0.0292913	0.0308372	0.0241015	0.0284079	0.0265307	0.0248744	0.0331561	0.0308372	0.0180283	0.0267516
cg00711916	0.0412255	0.0479011	0.0627508	0.0379559	0.0435415	0.0528056	0.0353674	0.0361848	0.0375472	0.0296455	0.053078	0.0390458	0.0273295	0.0410893	0.0244685	0.0352312	0.0957198	0.038637	0.0481735	0.0570289	0.0315528	0.036866	0.0394545	0.0474924	0.0421792	0.043814	0.0609797	0.0288281	0.046675	0.0534867	0.0274657	0.0410893	0.0425879	0.0286918	0.0476286	0.0540317	0.0493997	0.0417705	0.0300542	0.055939	0.0338688	0.0371385	0.0492634	0.0379559	0.0371385	0.0500809	0.053623	0.0622058	0.0318253
cg00712898	0.0211033	0.0166886	0.0186402	0.0157981	0.0212928	0.0250823	0.0216718	0.0190191	0.0222402	0.0239454	0.0106823	0.0154192	0.00935601	0.0152297	0.00935601	0.0212928	0.0229981	0.0275454	0.0150402	0.0137139	0.0140928	0.0260297	0.0180718	0.0239454	0.0190191	0.0135244	0.0193981	0.00973496	0.0203455	0.00765075	0.0114402	0.0142823	0.0103034	0.0349349	0.0315244	0.0229981	0.0167455	0.0216718	0.0104929	0.0173139	0.0159876	0.0220507	0.0144718	0.0188297	0.0193981	0.0192086	0.0267875	0.00632444	0.0229981
cg00714377	0.511182	0.154238	0.649942	0.702185	0.180406	0.597608	0.619629	0.663947	0.60415	0.561213	0.446317	0.633726	0.690575	0.594844	0.316494	0.425862	0.590329	0.685231	0.295763	0.517632	0.634187	0.345702	0.283232	0.56582	0.441433	0.598529	0.449726	0.547945	0.510445	0.472392	0.293828	0.614838	0.119871	0.522976	0.287378	0.292261	0.582866	0.240848	0.429824	0.548959	0.556698	0.107616	0.472392	0.386243	0.468246	0.427613	0.578812	0.560015	0.548406
cg00717862	0.0417909	0.0545905	0.0348988	0.0336681	0.0432678	0.0420371	0.0405602	0.0307144	0.0307144	0.04696	0.0329297	0.0282529	0.0297298	0.0422832	0.0297298	0.0344066	0.0501599	0.0289913	0.026776	0.0361296	0.0228377	0.0321912	0.0339143	0.0393295	0.0447447	0.0538521	0.0496676	0.0289913	0.0309605	0.0314528	0.033422	0.0410525	0.0257914	0.0412986	0.0464677	0.0378526	0.0415448	0.0432678	0.0297298	0.0331758	0.0405602	0.0378526	0.0459754	0.0422832	0.0484369	0.0314528	0.0400679	0.0213608	0.0348988
cg00718440	0.0522767	0.0490746	0.0574	0.0576134	0.373479	0.0544114	0.0551229	0.0527036	0.0530594	0.053771	0.0482919	0.0518497	0.0485765	0.100023	0.0472957	0.0574	0.0532729	0.0496439	0.0490034	0.0541979	0.0475803	0.0585385	0.0512093	0.0573288	0.0530594	0.376681	0.0601751	0.0481496	0.0502843	0.0475092	0.0497862	0.0523478	0.0477938	0.0532729	0.0585385	0.0514228	0.0523478	0.0554787	0.0506401	0.053771	0.0566172	0.0505689	0.0550518	0.0557633	0.0549095	0.0529171	0.0571865	0.0475803	0.0522055
cg00718513	0.342257	0.142872	0.16725	0.140045	0.410918	0.141458	0.552007	0.167957	0.197399	0.247452	0.216596	0.155709	0.191864	0.159477	0.142047	0.221189	0.168075	0.151233	0.366871	0.191511	0.141576	0.207528	0.164424	0.151587	0.145698	0.292558	0.232731	0.42399	0.177025	0.167839	0.128621	0.255931	0.618547	0.13027	0.496066	0.416217	0.153235	0.227902	0.180323	0.148289	0.158064	0.321883	0.175847	0.199048	0.169488	0.260642	0.218245	0.126266	0.261584
cg00718748	0.0416915	0.0412353	0.0394108	0.0348495	0.0544631	0.0380424	0.0421476	0.0129553	0.0426037	0.0353056	0.0325689	0.0289198	0.0275514	0.0530947	0.0197972	0.0334811	0.0407792	0.0581121	0.0239024	0.0444282	0.0243585	0.0325689	0.0312005	0.0439721	0.0348495	0.0886728	0.0302882	0.0129553	0.043516	0.0129553	0.0156921	0.026183	0.0234463	0.022534	0.0380424	0.0398669	0.0494457	0.0398669	0.0266392	0.0503579	0.0421476	0.0343934	0.0549192	0.0266392	0.036674	0.0312005	0.0480773	0.012043	0.0380424
cg00720072	0.0338175	0.0477492	0.0436156	0.0350422	0.0416254	0.0405537	0.039482	0.0388696	0.0353484	0.0365732	0.0324396	0.0321334	0.0332051	0.0508111	0.0335113	0.130574	0.037798	0.0358077	0.0399413	0.036267	0.0312149	0.0328989	0.0391758	0.0351953	0.0492801	0.050658	0.0468306	0.0293777	0.0397882	0.0306025	0.0287653	0.0361139	0.0321334	0.0341237	0.0384103	0.039482	0.0529544	0.0514235	0.0463713	0.0399413	0.0356546	0.0393289	0.0384103	0.0361139	0.0339706	0.0381042	0.0407068	0.0296839	0.0428501
cg00720137	0.024725	0.641074	0.0522822	0.022241	0.485201	0.0252684	0.0257342	0.0239488	0.578585	0.0255013	0.56927	0.490712	0.022241	0.0220858	0.0402502	0.0252684	0.597758	0.0272867	0.0225515	0.0217752	0.020378	0.524868	0.472082	0.0264328	0.0268209	0.669485	0.234392	0.571521	0.582932	0.0203004	0.444991	0.0240264	0.0206885	0.0238711	0.050652	0.347726	0.0251908	0.478292	0.0232501	0.0239488	0.142561	0.442973	0.0214647	0.024725	0.0230173	0.0246474	0.631991	0.0195241	0.025346
cg00720723	0.0342168	0.0597162	0.0472585	0.0445333	0.0435601	0.0416136	0.0418082	0.0445333	0.0365526	0.0445333	0.0301291	0.0293505	0.0322703	0.0307131	0.036358	0.035774	0.0398617	0.0400564	0.0309077	0.0414189	0.027404	0.0525141	0.0406403	0.0375259	0.0394724	0.058159	0.049205	0.035774	0.0348008	0.0330489	0.0412243	0.031881	0.0293505	0.0425868	0.0351901	0.0398617	0.0509569	0.0418082	0.0279879	0.0381098	0.0470638	0.0379152	0.0406403	0.039667	0.0311024	0.0338275	0.0431708	0.0250682	0.0449226
cg00722300	0.840338	0.827756	0.726178	0.424968	0.654126	0.495343	0.772648	0.740857	0.782042	0.720726	0.777932	0.637854	0.400727	0.775332	0.764679	0.516648	0.906183	0.597592	0.727185	0.587191	0.761492	0.673418	0.714184	0.484271	0.584758	0.626698	0.452397	0.641964	0.739767	0.845958	0.900228	0.876742	0.660585	0.851158	0.884291	0.878503	0.698834	0.678116	0.699924	0.654713	0.768957	0.620575	0.587358	0.718629	0.755285	0.829014	0.493833	0.983855	0.65832
cg00724662	0.0593857	0.061794	0.069822	0.0661291	0.0651658	0.0905341	0.0574589	0.0675742	0.0645235	0.0646841	0.052321	0.0653263	0.0471832	0.0743176	0.0577801	0.0595462	0.056335	0.0595462	0.0537661	0.0654869	0.061794	0.0704642	0.0516788	0.0720698	0.0458987	0.0656475	0.069822	0.0645235	0.0598673	0.0436509	0.0492704	0.0539266	0.0597068	0.052321	0.0677347	0.0695009	0.0780105	0.0651658	0.0579406	0.0556928	0.0597068	0.062918	0.0783316	0.0601884	0.0686981	0.0701431	0.0608307	0.0532844	0.0582617
cg00725635	0.0653711	0.090225	0.0639004	0.076548	0.108902	0.0861072	0.0540471	0.0740479	0.128462	0.130079	0.0665476	0.0488999	0.0352229	0.0541942	0.0350758	0.0987547	0.0772833	0.0759597	0.0647828	0.0803717	0.0288991	0.111108	0.0981664	0.0518412	0.0569884	0.0714007	0.111843	0.110373	0.0619886	0.107431	0.0444879	0.0539001	0.0431644	0.0471351	0.155963	0.0806658	0.0744891	0.0909603	0.0555178	0.0506646	0.10302	0.0677241	0.0593414	0.12405	0.0871366	0.0693418	0.0730184	0.0162516	0.553919
cg00725777	0.569662	0.550535	0.587075	0.591072	0.57185	0.607153	0.701073	0.917174	0.664343	0.697267	0.703738	0.840383	0.486019	0.443008	0.786905	0.90823	0.398474	0.643694	0.690225	0.312358	0.591928	0.540353	0.739897	0.605916	0.442818	0.943818	0.745797	0.929735	0.961327	0.536357	0.839717	0.752458	0.722769	0.969986	0.451762	0.512377	0.363742	0.866456	0.842857	0.44729	0.385248	0.694222	0.854085	0.688512	0.855418	0.471936	0.722103	0.785097	0.370974
cg00727590	0.197718	0.0768152	0.443385	0.446178	0.157308	0.193119	0.0966919	0.0932422	0.199936	0.406424	0.124207	0.133899	0.10548	0.237143	0.0879034	0.165111	0.121825	0.649298	0.117226	0.171517	0.649298	0.122072	0.112462	0.0727084	0.223098	0.371352	0.2047	0.115254	0.097349	0.536362	0.0817433	0.469997	0.195336	0.634021	0.197636	0.163714	0.391886	0.105234	0.11468	0.424001	0.263344	0.116979	0.177267	0.175378	0.170367	0.154351	0.316732	0.645438	0.152051
cg00728317	0.0432841	0.035942	0.0394462	0.0356083	0.0688976	0.0381113	0.0403639	0.0495414	0.458107	0.035942	0.0495414	0.0405308	0.0371101	0.0321042	0.0270148	0.0363592	0.0476225	0.0379444	0.0433675	0.0333557	0.0307693	0.0493746	0.345141	0.0400302	0.286154	0.34781	0.0758225	0.384687	0.0411148	0.218157	0.0344403	0.0394462	0.0308527	0.0388622	0.0570503	0.0773243	0.0442852	0.0816627	0.0473722	0.0424497	0.0824136	0.62689	0.034774	0.0480397	0.0423663	0.0442018	0.405128	0.0245953	0.230505
cg00728602	0.0775175	0.0619435	0.0969115	0.0560665	0.0869206	0.0775175	0.0760482	0.111016	0.0913283	0.0710234	0.0507772	0.0475449	0.0457818	0.0625312	0.049308	0.084276	0.0545972	0.062825	0.0592988	0.056948	0.0460756	0.0869533	0.0513649	0.0684081	0.0537157	0.0545972	0.0807498	0.0469572	0.0563603	0.0460756	0.0507772	0.066645	0.0516587	0.059005	0.0875671	0.0642943	0.0710528	0.0825129	0.0557726	0.0660573	0.0631189	0.0616496	0.0501895	0.0607681	0.0634127	0.0763421	0.0717874	0.0343217	0.0637066
cg00729275	0.674978	0.257845	0.590544	0.265828	0.526677	0.406319	0.65554	0.326571	0.605643	0.511405	0.723833	0.455347	0.327092	0.260448	0.242225	0.483636	0.463157	0.319369	0.41569	0.294898	0.705957	0.205258	0.683048	0.197275	0.240576	0.3336	0.753423	0.489016	0.20951	0.390265	0.15892	0.34679	0.578135	0.700229	0.564945	0.601131	0.266262	0.35729	0.384625	0.329175	0.484417	0.296807	0.598528	0.313555	0.471661	0.375426	0.536483	0.489016	0.281882
cg00729541	0.0539412	0.0683353	0.0471039	0.0255127	0.0686952	0.0787711	0.0435054	0.0438652	0.0582594	0.0546609	0.0172361	0.0233536	0.0193952	0.0139974	0.0179558	0.0676156	0.0539412	0.0474638	0.0172361	0.0287514	0.0276718	0.0798506	0.0435054	0.069055	0.037028	0.0161565	0.0478236	0.0114784	0.0442251	0.019755	0.0319901	0.0154368	0.0305507	0.0359485	0.0974835	0.0769718	0.0525017	0.0507025	0.0298309	0.0456645	0.0237134	0.0467441	0.0373879	0.0596988	0.0553806	0.0564601	0.102881	0.000682783	0.0460244
cg00729875	0.19529	0.133892	0.13202	0.126155	0.217253	0.127527	0.138135	0.142378	0.43564	0.139258	0.151987	0.135639	0.139757	0.13514	0.115922	0.152985	0.121537	0.138135	0.124657	0.138759	0.129399	0.13489	0.862804	0.133268	0.130023	0.337178	0.125531	0.181313	0.118667	0.272536	0.127153	0.380107	0.309599	0.133642	0.143002	0.152236	0.132145	0.133892	0.182561	0.130023	0.178692	0.311846	0.150115	0.153235	0.172203	0.140755	0.153983	0.119541	0.164715
cg00730260	0.918307	0.93672	0.923321	0.94146	0.915664	0.928972	0.918399	0.925053	0.92797	0.922774	0.94383	0.936447	0.908645	0.950667	0.929428	0.906731	0.946382	0.939273	0.941096	0.927058	0.91457	0.924324	0.929793	0.946109	0.927605	0.952307	0.95094	0.943283	0.930613	0.903176	0.933165	0.943283	0.849761	0.905546	0.915937	0.948388	0.950211	0.938088	0.93909	0.888956	0.923047	0.926693	0.928334	0.906366	0.913021	0.942919	0.932254	0.942645	0.930066
cg00731459	0.0276188	0.0239217	0.022223	0.0178265	0.0226227	0.0247211	0.0200248	0.0219233	0.0242215	0.0265197	0.014629	0.0211239	0.0206243	0.0230224	0.0148288	0.0445056	0.0224229	0.0228226	0.0190255	0.0191255	0.0177265	0.0279186	0.018426	0.0267195	0.0194252	0.0175267	0.0190255	0.0156282	0.0211239	0.0153284	0.0181262	0.0181262	0.017127	0.0219233	0.0281184	0.0244213	0.0211239	0.0265197	0.0186258	0.0264198	0.0189256	0.0231223	0.0186258	0.0182262	0.0182262	0.0194252	0.0435064	0.0129303	0.0185259
cg00733682	0.0310854	0.0185512	0.0403849	0.0258291	0.03432	0.0302767	0.029468	0.0282551	0.0262334	0.0351286	0.0258291	0.0262334	0.0258291	0.0290637	0.0238074	0.0379589	0.0327027	0.0363416	0.0238074	0.0347243	0.0209771	0.0391719	0.029468	0.0359373	0.0310854	0.0217858	0.0286594	0.0201685	0.0258291	0.0250204	0.0238074	0.0193598	0.0209771	0.0258291	0.0282551	0.030681	0.0440238	0.033107	0.0153166	0.0488758	0.0391719	0.0229988	0.0363416	0.0254248	0.0347243	0.031894	0.0258291	0.0145079	0.0250204
cg00734993	0.0280564	0.0225999	0.0240359	0.0191537	0.0266205	0.0195845	0.0256154	0.0279128	0.0271949	0.0383951	0.0236051	0.0221692	0.0247538	0.0204461	0.0194409	0.0244666	0.0221692	0.0227435	0.0162819	0.0251846	0.0149896	0.0336565	0.0246102	0.0280564	0.0201589	0.0223128	0.0290616	0.0157075	0.0247538	0.0165691	0.0207332	0.0205897	0.0215948	0.0201589	0.0292052	0.0261897	0.0231743	0.0256154	0.0241795	0.0247538	0.0208768	0.0217384	0.0234615	0.0217384	0.0246102	0.0227435	0.0408361	0.00867152	0.0225999
cg00736326	0.0277577	0.0272158	0.0290448	0.0236255	0.0278932	0.0264029	0.0264029	0.0248448	0.027419	0.02769	0.0261997	0.025319	0.0255223	0.025861	0.0230835	0.0243029	0.0269448	0.0310094	0.0236932	0.181939	0.0257932	0.0251158	0.0259287	0.0310771	0.0251835	0.0314158	0.0269448	0.0257255	0.0241674	0.0228126	0.0281642	0.0233545	0.0245739	0.0249803	0.0267416	0.025319	0.0303319	0.0236932	0.0267416	0.0265384	0.0250481	0.0278255	0.0273513	0.0257255	0.0295868	0.0242352	0.0257255	0.0197642	0.0274868
cg00737514	0.0278667	0.0324296	0.0360245	0.0656137	0.0309086	0.0320148	0.0282815	0.0303556	0.0296642	0.034227	0.0239953	0.0256545	0.0215065	0.0347801	0.023857	0.0304938	0.0309086	0.0314617	0.0234422	0.0328444	0.0231657	0.0349184	0.0264841	0.0260693	0.0306321	0.0361628	0.0468093	0.0252397	0.030079	0.0253779	0.037822	0.023857	0.0306321	0.0273137	0.0282815	0.0266223	0.0329826	0.0266223	0.0210917	0.0314617	0.038375	0.0327061	0.0289729	0.0289729	0.025931	0.0310469	0.0316	0.0245483	0.0299408
cg00739120	0.28654	0.151428	0.423204	0.178392	0.278198	0.307102	0.224367	0.214667	0.609626	0.262291	0.164522	0.345706	0.25686	0.185472	0.228344	0.438723	0.505939	0.172766	0.231738	0.259285	0.374513	0.185084	0.244735	0.186151	0.207878	0.581401	0.24299	0.289062	0.262388	0.326889	0.248518	0.58819	0.239983	0.165104	0.536008	0.298276	0.264328	0.470537	0.442991	0.171505	0.230962	0.417384	0.201379	0.294978	0.389062	0.235133	0.774127	0.148809	0.440469
cg00741717	0.696504	0.697199	0.751027	0.536935	0.618154	0.805115	0.534587	0.744244	0.939291	0.858072	0.42102	0.890247	0.60198	0.762418	0.79181	0.901204	0.878594	0.820245	0.60285	0.9139	0.262495	0.76094	0.7332	0.608154	0.846942	0.615198	0.377019	0.871638	0.544588	0.492761	0.63172	0.9379	0.782593	0.891812	0.860507	0.823811	0.895725	0.904073	0.488674	0.7072	0.54937	0.940857	0.616154	0.77094	0.714156	0.87129	0.915813	0.640764	0.854942
cg00743372	0.0290953	0.0246504	0.0244164	0.0265219	0.0356456	0.0267559	0.0294462	0.0315517	0.0258201	0.0295632	0.0231298	0.0240655	0.0213752	0.0280425	0.0217261	0.0326044	0.0278086	0.0280425	0.026171	0.0251183	0.0217261	0.0323705	0.0290953	0.0319026	0.026288	0.0274577	0.0322535	0.0200885	0.0268728	0.0203225	0.0226619	0.0227789	0.0230128	0.0276916	0.0316686	0.0278086	0.0285104	0.030031	0.0286274	0.0292122	0.0315517	0.0269898	0.0288613	0.0287444	0.0297971	0.0247674	0.0314347	0.0156436	0.0293292
cg00744433	0.271321	0.138996	0.224082	0.1268	0.467427	0.186235	0.272303	0.199692	0.344913	0.448503	0.213709	0.264453	0.231792	0.165068	0.237539	0.34239	0.184833	0.171376	0.236978	0.276788	0.11881	0.227446	0.208663	0.129604	0.210345	0.215531	0.43757	0.327672	0.121754	0.395517	0.107456	0.55756	0.768804	0.121333	0.407151	0.492098	0.216933	0.304963	0.200813	0.135211	0.175581	0.243707	0.184132	0.44612	0.378976	0.260808	0.19857	0.156518	0.345334
cg00745543	0.926945	0.860226	0.703999	0.943379	0.837329	0.923549	0.914565	0.90602	0.857158	0.904486	0.926507	0.915771	0.826921	0.894407	0.785728	0.724048	0.917085	0.920591	0.871181	0.680116	0.928479	0.93078	0.885862	0.396805	0.485983	0.931875	0.873372	0.910731	0.928589	0.601674	0.934614	0.887396	0.67924	0.927383	0.899228	0.917633	0.4942	0.921577	0.901967	0.548211	0.910183	0.93308	0.917852	0.887724	0.791315	0.536598	0.897256	0.935052	0.914894
cg00745735	0.746976	0.732644	0.823237	0.80749	0.834384	0.657179	0.706457	0.719993	0.850574	0.646386	0.952315	0.859775	0.799085	0.908257	0.752019	0.779002	0.706457	0.666114	0.770244	0.636565	0.933294	0.610113	0.781745	0.601354	0.809082	0.780949	0.637893	0.897464	0.879858	0.812532	0.669034	0.887113	0.813506	0.922058	0.682128	0.74388	0.717604	0.600204	0.91215	0.681597	0.746268	0.730255	0.827041	0.749542	0.786965	0.749453	0.81209	0.941168	0.890474
cg00746083	0.0313837	0.0439416	0.0312093	0.0469067	0.0329535	0.0338255	0.0371394	0.0251048	0.0291163	0.0367906	0.0230118	0.0271978	0.0258025	0.0451625	0.0244071	0.0299884	0.0252792	0.0371394	0.024756	0.0329535	0.0291163	0.0280699	0.0251048	0.0296396	0.0292908	0.0303373	0.0352209	0.0266745	0.0326046	0.0203956	0.0310349	0.0251048	0.0237095	0.0306861	0.0331279	0.0291163	0.0270234	0.025628	0.0282443	0.0345232	0.031907	0.0292908	0.0380115	0.0291163	0.0312093	0.0278954	0.0331279	0.0190003	0.0284187
cg00746130	0.0526434	0.07461	0.0564246	0.0596655	0.0641669	0.0634467	0.0638068	0.0630866	0.0584052	0.0715491	0.0663275	0.0400397	0.0506628	0.0618262	0.0503027	0.0571448	0.057685	0.067948	0.0530035	0.0623664	0.0573248	0.0647071	0.051203	0.0524634	0.0436407	0.0895545	0.0922553	0.0526434	0.0506628	0.0542639	0.0598456	0.07461	0.0551642	0.0652472	0.0540839	0.0584052	0.148972	0.0589453	0.0728095	0.0548041	0.0737098	0.0481421	0.067948	0.0627265	0.0549841	0.0537238	0.0596655	0.0394995	0.0686683
cg00746981	0.0612984	0.170202	0.20054	0.0467732	0.266082	0.348153	0.0672373	0.167769	0.23281	0.252845	0.156106	0.307154	0.143226	0.0439826	0.337993	0.0866281	0.332483	0.0550733	0.330838	0.0641605	0.175282	0.248266	0.31438	0.209985	0.182151	0.280894	0.284686	0.147519	0.299354	0.139792	0.283971	0.191596	0.0972179	0.0646614	0.081834	0.316813	0.0779702	0.300571	0.256065	0.0689546	0.312663	0.313951	0.291841	0.302932	0.328333	0.079115	0.286546	0.297279	0.249124
cg00747849	0.122054	0.0894235	0.176464	0.0703363	0.208857	0.0885523	0.155556	0.137656	0.358308	0.202521	0.116668	0.163713	0.142092	0.117064	0.163713	0.232538	0.144468	0.119044	0.136468	0.155397	0.0906907	0.140983	0.182008	0.0681186	0.151912	0.124826	0.180108	0.20957	0.118094	0.173059	0.0928291	0.221608	0.2224	0.110807	0.2323	0.191988	0.150487	0.141854	0.132825	0.102887	0.112391	0.439805	0.150883	0.257803	0.169812	0.137419	0.471564	0.102254	0.237211
cg00751288	0.0350199	0.0341101	0.0286514	0.0332003	0.0353232	0.0319873	0.0322905	0.0265285	0.0301677	0.0253155	0.0268318	0.0289546	0.0456341	0.0274383	0.0237992	0.025922	0.0289546	0.0250122	0.0313807	0.0410852	0.0262253	0.0319873	0.0268318	0.0332003	0.024709	0.0353232	0.0353232	0.0234959	0.0289546	0.0244057	0.0241024	0.0280449	0.0277416	0.0280449	0.0274383	0.0341101	0.0380525	0.0271351	0.024709	0.0310775	0.0398721	0.0319873	0.0347166	0.0234959	0.0435113	0.031684	0.0283481	0.02016	0.0289546
cg00754617	0.900698	0.892312	0.885353	0.934956	0.777137	0.927997	0.877948	0.916043	0.841103	0.86189	0.880536	0.880446	0.884372	0.882766	0.687387	0.825758	0.914794	0.912563	0.714776	0.878305	0.873398	0.875094	0.878305	0.943431	0.916221	0.894988	0.90043	0.867332	0.867064	0.894899	0.938257	0.817729	0.75974	0.916756	0.905159	0.859124	0.863496	0.896059	0.882409	0.878394	0.88232	0.855556	0.903464	0.822993	0.857518	0.891509	0.894007	0.898735	0.864209
cg00755043	0.0576291	0.698313	0.0560236	0.0548903	0.314979	0.743928	0.052246	0.640988	0.677442	0.346617	0.597545	0.596034	0.406114	0.0483739	0.20439	0.051396	0.501122	0.0512071	0.338117	0.433785	0.178985	0.425475	0.0499794	0.0519626	0.0536626	0.725229	0.471089	0.660726	0.128082	0.0987107	0.232061	0.428214	0.121849	0.0506405	0.0551736	0.322629	0.658365	0.640044	0.0502627	0.40772	0.604439	0.56893	0.0632955	0.513115	0.572046	0.0551736	0.675836	0.399692	0.055268
cg00756058	0.0232763	0.626623	0.458513	-0.0143774	0.494125	0.655662	0.462599	0.550872	0.57405	0.549895	0.557177	0.401234	0.0151061	-0.0125125	0.430717	-0.0130453	0.585417	0.0372188	0.418107	0.0349986	-0.0167752	0.630442	0.543767	0.228062	0.634615	0.679107	0.636924	0.598027	0.566679	0.432138	0.751573	0.289694	0.244225	-0.0132229	0.00675838	0.396172	0.434003	0.541991	0.203197	0.704506	0.456826	0.541192	0.505225	0.556733	0.617653	0.441729	0.639589	0.0266509	0.0369523
cg00756887	0.554801	0.43436	0.626835	0.421396	0.652763	0.626417	0.541627	0.413241	0.742257	0.477539	0.722184	0.514445	0.555533	0.365044	0.336502	0.447533	0.704515	0.392122	0.361176	0.5387	0.285064	0.495417	0.365776	0.451297	0.642831	0.331379	0.673778	0.442828	0.265304	0.467293	0.425578	0.610107	0.654227	0.360966	0.609584	0.553651	0.436346	0.562119	0.391808	0.483707	0.475343	0.552919	0.369853	0.592229	0.554905	0.540687	0.541627	0.304301	0.740375
cg00757070	0.333359	0.134244	0.270622	0.142474	0.469523	0.141725	0.17443	0.192279	0.264743	0.265812	0.204784	0.232679	0.175072	0.155085	0.148566	0.339345	0.218037	0.1926	0.191317	0.20083	0.108272	0.177102	0.253307	0.129114	0.224022	0.196234	0.269018	0.25149	0.24294	0.284516	0.0641312	0.280134	0.541239	0.204036	0.317969	0.413412	0.245719	0.246146	0.185866	0.151131	0.25801	0.3169	0.379959	0.304395	0.200402	0.180843	0.388295	0.485341	0.301616
cg00757952	0.764043	0.769617	0.668429	0.855429	0.491999	0.801424	0.680345	0.561956	0.733389	0.755395	0.739635	0.680153	0.810361	0.70014	0.636237	0.59828	0.757028	0.833231	0.408205	0.484888	0.842745	0.264351	0.534185	0.817376	0.533416	0.31605	0.316434	0.524191	0.838805	0.708885	0.838036	0.411088	0.56186	0.852066	0.672177	0.608946	0.625571	0.369286	0.651805	0.499879	0.751263	0.370536	0.694855	0.784511	0.751839	0.621823	0.270886	0.632874	0.344782
cg00761755	0.0328805	0.0241273	0.0247879	0.0256137	0.0363487	0.0264395	0.0272652	0.0264395	0.0246228	0.028091	0.0233015	0.0251182	0.0228061	0.0271001	0.0231364	0.0292471	0.0254485	0.0256137	0.0228061	0.0378351	0.0254485	0.0257788	0.0251182	0.0289168	0.0274304	0.0261092	0.0274304	0.0351927	0.0239621	0.0208242	0.0224758	0.0241273	0.0223106	0.0244576	0.0266046	0.0408079	0.0252834	0.0313941	0.0244576	0.0277607	0.0257788	0.0282562	0.0290819	0.0249531	0.025944	0.0267698	0.0964651	0.0198333	0.0234667
cg00762512	0.0483937	0.0442621	0.046623	0.0358516	0.0464755	0.0364418	0.0386551	0.0423439	0.0392453	0.0377698	0.0269984	0.0330481	0.0436719	0.0377698	0.0308348	0.0556238	0.0371796	0.0337858	0.034376	0.0337858	0.0331956	0.0600504	0.0424915	0.0445573	0.0449999	0.0293592	0.0405733	0.0305396	0.045295	0.0262606	0.0423439	0.0318676	0.0336383	0.0379173	0.0653623	0.0392453	0.0398355	0.0469181	0.0392453	0.0377698	0.0309823	0.0451475	0.0374747	0.0395404	0.0334907	0.0433768	0.0578371	0.0269984	0.0395404
cg00763679	0.0410765	0.0377945	0.0593098	0.0398001	0.0600391	0.0408941	0.0518341	0.0549338	0.0465465	0.0684265	0.0436291	0.0387061	0.0367005	0.0359711	0.0323245	0.0651445	0.0458171	0.0520165	0.0441761	0.0332361	0.0286778	0.0707968	0.0472758	0.0439938	0.0456348	0.0594921	0.0500108	0.0443585	0.0518341	0.0303188	0.0376121	0.0439938	0.0390708	0.0540221	0.0543868	0.0399825	0.0445408	0.0500108	0.0478228	0.0469111	0.0405295	0.0428998	0.0377945	0.0574865	0.0337831	0.0480051	0.0518341	0.0263075	0.0520165
cg00763889	0.867971	0.921158	0.903599	0.895928	0.931216	0.907776	0.921158	0.924226	0.924567	0.712244	0.956019	0.930534	0.945535	0.929426	0.909907	0.910163	0.912123	0.834047	0.922607	0.886978	0.910163	0.865414	0.86243	0.889535	0.904196	0.937949	0.921499	0.947325	0.85314	0.927295	0.864987	0.89124	0.930449	0.879051	0.862516	0.898826	0.859788	0.879478	0.94903	0.895672	0.806345	0.904111	0.877176	0.858424	0.942296	0.907009	0.893968	0.926357	0.880586
cg00766729	0.0318668	0.0299145	0.0315053	0.0320114	0.0336745	0.0307822	0.0323006	0.0299145	0.0349037	0.0309268	0.0296976	0.0309991	0.0305653	0.0396758	0.0291915	0.0312161	0.0304207	0.0308545	0.030493	0.0309991	0.0305653	0.0322283	0.0307099	0.0307822	0.0325176	0.0328791	0.0408327	0.0308545	0.0307822	0.0299145	0.0299869	0.0302038	0.0307822	0.0319391	0.0432188	0.0315053	0.030493	0.0312161	0.0294084	0.0317945	0.0305653	0.0325176	0.0312884	0.033096	0.0318668	0.0497987	0.0320837	0.0283238	0.0324453
cg00766889	0.0466242	0.0333736	0.0493157	0.0474524	0.0526284	0.0495228	0.0625664	0.0580115	0.0549059	0.0441397	0.0569763	0.045796	0.0402059	0.060496	0.0526284	0.0965211	0.0528355	0.0478665	0.040413	0.0540777	0.0377214	0.0497298	0.0395848	0.0549059	0.0696058	0.055734	0.0712621	0.0410341	0.0445538	0.0426904	0.0491087	0.0830635	0.0383426	0.0522143	0.0636016	0.0518002	0.0522143	0.055527	0.0397919	0.0586326	0.0544918	0.050351	0.0445538	0.0424834	0.050558	0.0598749	0.0772663	0.0408271	0.0495228
cg00767581	0.745791	0.844947	0.460553	0.469439	0.647339	0.866854	0.22045	0.846443	0.778872	0.759604	0.811338	0.776673	0.807027	0.710422	0.75802	0.301217	0.521525	0.182001	0.286084	0.549415	0.710598	0.72274	0.702592	0.558213	0.499177	0.784239	0.815033	0.77808	0.446564	0.756437	0.863863	0.734265	0.541584	0.509295	0.67303	0.719924	0.648043	0.617513	0.327612	0.710774	0.676285	0.740688	0.350927	0.294883	0.796997	0.333155	0.830254	0.587335	0.634406
cg00768439	0.553946	0.461995	0.64065	0.730312	0.412681	0.685099	0.024465	0.705893	0.557284	0.629776	0.561386	0.637502	0.475539	0.763983	0.739469	0.557379	0.59725	0.648853	0.646087	0.216761	0.741472	0.696736	0.610318	0.741186	0.681284	0.740613	0.413921	0.606979	0.679663	0.560622	0.793647	0.567109	0.169068	0.00844041	0.555853	0.441105	0.658201	0.561099	0.668312	0.655626	0.696355	0.597346	0.396752	0.606693	0.684432	0.379773	0.67785	0.779244	0.545075
cg00769470	0.728378	0.87009	0.678352	0.919604	0.878371	0.340036	0.774819	0.886139	0.86548	0.774563	0.931556	0.619533	0.902189	0.759964	0.85387	0.81221	0.407221	0.919348	0.62935	0.589483	0.920884	0.771831	0.521444	0.474321	0.930702	0.892286	0.432661	0.932409	0.941714	0.759623	0.712329	0.907055	0.619191	0.66179	0.730683	0.799405	0.622179	0.75655	0.700804	0.72411	0.774306	0.937275	0.884176	0.622777	0.680145	0.501297	0.833808	0.926433	0.85498
cg00769520	0.0296458	0.305241	0.0301666	0.0408432	0.507314	0.56252	0.0303402	0.644461	0.602188	0.0315554	0.156376	0.029125	0.0303402	0.0803378	0.0333782	0.0305138	0.0306874	0.0309478	0.0286042	0.0297326	0.0282569	0.0383259	0.032597	0.0302534	0.0332914	0.615035	0.59047	0.157852	0.413742	0.056641	0.0561202	0.164535	0.0312082	0.029559	0.031729	0.0414508	0.0323366	0.3739	0.0324234	0.0324234	0.214099	0.55575	0.028691	0.031295	0.0319894	0.029993	0.370949	0.0263473	0.0669704
cg00770279	0.0200707	0.0215287	0.0286103	0.0211121	0.0273606	0.0331926	0.0211121	0.0225701	0.0206955	0.0265275	0.0196541	0.0234032	0.0238198	0.0206955	0.0215287	0.0227784	0.0204872	0.028402	0.0186127	0.0242364	0.0177796	0.0192375	0.018821	0.0256943	0.0240281	0.0240281	0.0254861	0.0200707	0.0213204	0.0190293	0.0186127	0.0223618	0.0198624	0.0213204	0.0242364	0.0231949	0.0215287	0.0229867	0.0184044	0.0254861	0.0259026	0.0204872	0.0238198	0.0221535	0.0213204	0.0204872	0.0227784	0.0169464	0.0219452
cg00770871	0.0156174	0.0151725	0.012948	0.0154691	0.0156174	0.0133929	0.0138378	0.0105752	0.0113167	0.0150242	0.0113167	0.0127997	0.0123548	0.0127997	0.0104269	0.0123548	0.012948	0.0176936	0.0130963	0.0120582	0.0120582	0.0125031	0.0136895	0.0145793	0.0123548	0.0139861	0.0102786	0.0117616	0.0138378	0.0108718	0.0119099	0.0148759	0.0108718	0.0108718	0.0108718	0.0185834	0.0148759	0.0135412	0.0102786	0.0136895	0.017397	0.0125031	0.0153208	0.0123548	0.0119099	0.0119099	0.0142827	0.0113167	0.0125031
cg00772000	0.381281	0.0318207	0.0559525	0.534416	0.572945	0.0301846	0.0425368	0.0570977	0.671353	0.0589792	0.659165	0.44836	0.0504717	0.129248	0.0323933	0.047445	0.644359	0.0387739	0.0387739	0.0658506	0.579162	0.0577521	0.0509625	0.0305119	0.0553798	0.390034	0.626853	0.535316	0.046218	0.0448273	0.638387	0.162132	0.0576703	0.565828	0.0592246	0.138982	0.637896	0.0393465	0.0391011	0.0469542	0.0483448	0.644849	0.482553	0.123685	0.0678138	0.0624967	0.68526	0.0247857	0.083929
cg00775197	0.0950772	0.392744	0.241954	0.199516	0.46257	0.364552	0.101197	0.137515	0.658406	0.113537	0.701145	0.410301	0.115945	0.272955	0.105511	0.0898602	0.207743	0.0901612	0.146645	0.199516	0.218478	0.444712	0.0964817	0.0909638	0.0862485	0.727932	0.640147	0.682685	0.185872	0.169218	0.0941743	0.467787	0.110728	0.0831384	0.092569	0.364652	0.0973847	0.36405	0.088556	0.315292	0.141428	0.598512	0.157981	0.108621	0.109524	0.11755	0.695928	0.251686	0.372177
cg00777121	0.0727958	0.0455812	0.562133	0.0670204	0.204231	0.0483814	0.0542444	0.0407684	0.0423435	0.0635201	0.0465438	0.0461938	0.0480314	0.068683	0.0374431	0.0804964	0.631176	0.055032	0.0399808	0.400596	0.0447062	0.464563	0.51523	0.0616825	0.048469	0.049519	0.055907	0.042606	0.0670204	0.0380557	0.303376	0.205631	0.0387557	0.0770836	0.0562571	0.2878	0.0650952	0.0536318	0.0490815	0.0543319	0.0653577	0.492391	0.0600198	0.123287	0.0741084	0.506392	0.0840842	0.035518	0.0475064
cg00777555	0.0435723	0.0391614	0.0380586	0.0435723	0.0340153	0.0395289	0.0358532	0.0270314	0.0347505	0.027399	0.0226205	0.0314423	0.0266639	0.0435723	0.0259287	0.0490859	0.0285017	0.0409992	0.0395289	0.0564373	0.0266639	0.0398965	0.0358532	0.044675	0.0266639	0.042102	0.0362208	0.0270314	0.029972	0.0215178	0.0255611	0.0329126	0.0255611	0.0314423	0.0351181	0.0347505	0.0457777	0.0351181	0.027399	0.0432047	0.0435723	0.0314423	0.0373235	0.0354856	0.0402641	0.0259287	0.0354856	0.0207827	0.0303396
cg00778920	0.0926096	0.119612	0.0810843	0.107098	0.104135	0.115002	0.0794379	0.130149	0.0827308	0.0965611	0.0616561	0.0712056	0.0553995	0.0968904	0.0665955	0.0744985	0.0814136	0.0847066	0.0662662	0.0754864	0.0718641	0.114014	0.10183	0.102818	0.0899752	0.114014	0.105123	0.0754864	0.0912924	0.0768035	0.146943	0.0712056	0.0721934	0.086353	0.0922803	0.0843773	0.0735106	0.0866823	0.0623146	0.0774621	0.118294	0.0870116	0.0866823	0.086353	0.0774621	0.0810843	0.112696	0.0633025	0.0982076
cg00779924	0.174922	0.863845	0.243214	0.154592	0.506677	0.845733	0.561107	0.525067	0.782431	0.247834	0.738166	0.108109	0.284059	0.330542	0.295056	0.273247	0.448736	0.637254	0.237577	0.225009	0.109773	0.811541	0.20089	0.468419	0.575246	0.638178	0.652779	0.723843	0.634204	0.149786	0.798973	0.548077	0.15681	0.190355	0.211332	0.259293	0.390979	0.581992	0.410477	0.14073	0.530704	0.745929	0.131119	0.572104	0.801098	0.135648	0.84333	0.626996	0.346714
cg00782174	0.0373495	0.0432565	0.0405926	0.0408242	0.0417508	0.0418666	0.0405926	0.0379286	0.0397818	0.0434882	0.031674	0.0328323	0.0309791	0.0395501	0.0344538	0.0429091	0.0434882	0.04094	0.0307474	0.043604	0.0309791	0.0357279	0.037002	0.0398976	0.0331798	0.0554182	0.0392027	0.0328323	0.0414033	0.0348013	0.0317899	0.0361912	0.0320215	0.0354963	0.0400134	0.0456889	0.0614411	0.0432565	0.0304	0.043604	0.0335272	0.0385077	0.0422141	0.0415192	0.0444148	0.0386235	0.0410559	0.0251878	0.0447623
cg00782854	0.0475094	0.0555215	0.0377168	0.0347494	0.0555215	0.0350461	0.0519606	0.0424647	0.0555215	0.0412778	0.0439485	0.0406843	0.0552248	0.0356396	0.0466192	0.0481029	0.0362331	0.0347494	0.0424647	0.0332657	0.0374201	0.0323754	0.040981	0.0492899	0.0323754	0.0332657	0.0371233	0.0448387	0.0302982	0.0466192	0.0460257	0.0394973	0.054928	0.0359364	0.0371233	0.0472127	0.0344526	0.0481029	0.0534443	0.0406843	0.0475094	0.0463224	0.0374201	0.0463224	0.0377168	0.0335624	0.0418713	0.0344526	0.0403875
cg00783759	0.0150106	0.0158495	0.0161291	0.0164087	0.0157096	0.0152902	0.0157096	0.0137524	0.0129136	0.0171077	0.0131932	0.0145912	0.0131932	0.0129136	0.0120748	0.0169679	0.0148708	0.0155698	0.013333	0.0185057	0.011236	0.0164087	0.0144514	0.0176669	0.0172475	0.0166883	0.025356	0.0116554	0.0152902	0.0131932	0.0158495	0.0166883	0.013333	0.0155698	0.01543	0.014731	0.0189251	0.0137524	0.0117952	0.0218609	0.0176669	0.0175271	0.0150106	0.0145912	0.0180863	0.0116554	0.0164087	0.011935	0.0122146
cg00784357	0.0383869	0.0500828	0.0432029	0.0356349	0.0421709	0.0380429	0.0373549	0.0342589	0.0383869	0.0359789	0.0373549	0.0349469	0.0387309	0.0383869	0.0325389	0.0356349	0.0432029	0.0363229	0.0414829	0.0428589	0.0335709	0.0339149	0.0370109	0.0387309	0.0363229	0.0445789	0.0308189	0.0294429	0.0352909	0.0315069	0.0404509	0.0294429	0.0315069	0.0359789	0.0359789	0.0411389	0.0493948	0.0370109	0.0449229	0.0352909	0.0370109	0.0428589	0.0428589	0.0387309	0.0359789	0.0387309	0.0421709	0.0246269	0.0376989
cg00791249	0.0635318	0.0534379	0.0385773	0.121011	0.0596064	0.0725043	0.0545594	0.0307264	0.0576437	0.0458674	0.0332499	0.0711023	0.0481105	0.0433439	0.0598868	0.0697004	0.0638122	0.0559614	0.0736258	0.0447458	0.0531575	0.0495124	0.0568025	0.0520359	0.0750278	0.049232	0.0792336	0.0601672	0.0713827	0.0321284	0.0259598	0.0621299	0.0713827	0.0548398	0.0523163	0.0814767	0.045587	0.0539986	0.0640926	0.0725043	0.0666161	0.0279225	0.0584849	0.0380165	0.054279	0.0618495	0.0500732	0.0472693	0.0682984
cg00792687	0.029702	0.0369464	0.0313955	0.0374168	0.0368523	0.035441	0.0329949	0.0300783	0.0311132	0.0369464	0.0289493	0.0280085	0.0345943	0.0352529	0.030831	0.0315836	0.0273499	0.0295138	0.0302665	0.0312073	0.0267854	0.0306428	0.0299842	0.0306428	0.0313014	0.0434381	0.0281026	0.0312073	0.029702	0.030831	0.0313014	0.0313955	0.0311132	0.0294197	0.0349706	0.0313014	0.0295138	0.0302665	0.0338416	0.0371345	0.0309251	0.0338416	0.0321481	0.0321481	0.0326186	0.0316777	0.0562333	0.0256564	0.0335594
cg00792740	0.0361229	0.0320888	0.0393886	0.0325691	0.0428464	0.0271903	0.0342019	0.0290152	0.0394847	0.0334335	0.0253653	0.02671	0.020947	0.0385242	0.0252692	0.0375637	0.0331454	0.0353545	0.0296876	0.0319928	0.0239245	0.0414057	0.0288231	0.0336256	0.0364111	0.049762	0.0370834	0.0249811	0.0374676	0.0272863	0.0204667	0.0296876	0.0244048	0.0358348	0.0415978	0.0333375	0.0346822	0.0315125	0.0360269	0.0364111	0.0294955	0.0424622	0.0291113	0.0333375	0.0250771	0.0351624	0.0329533	0.0187378	0.0389084
cg00792849	0.501858	0.769226	0.617624	0.740856	0.526046	0.620312	0.711989	0.738965	0.502753	0.576613	0.701438	0.594332	0.647984	0.646392	0.660527	0.596521	0.465824	0.411374	0.636736	0.552425	0.764448	0.626085	0.578604	0.69457	0.633153	0.694868	0.651369	0.621108	0.685113	0.499469	0.778085	0.510319	0.235485	0.774302	0.525847	0.407094	0.571636	0.570541	0.681331	0.615534	0.63584	0.596721	0.529132	0.585572	0.647088	0.614041	0.668589	0.688697	0.556207
cg00793774	0.0484534	0.0399322	0.04488	0.051477	0.0429559	0.0459795	0.0413066	0.0446051	0.0399322	0.0393825	0.0465293	0.042681	0.0388327	0.0484534	0.0435056	0.0501027	0.0597234	0.0490032	0.0377332	0.0437805	0.038283	0.042681	0.0473539	0.058349	0.0451549	0.0440554	0.049278	0.0377332	0.0377332	0.0347096	0.0377332	0.0413066	0.0399322	0.0355342	0.0462544	0.0402071	0.0446051	0.0597234	0.0410317	0.0501027	0.0454298	0.0374583	0.0550504	0.0443302	0.0643963	0.049278	0.0429559	0.0374583	0.0380081
cg00795268	0.894449	0.944489	0.916582	0.941762	0.927328	0.939517	0.948017	0.942564	0.954914	0.947536	0.971754	0.94497	0.978971	0.964055	0.975924	0.92829	0.966782	0.942564	0.938394	0.954272	0.854674	0.9493	0.927328	0.92396	0.966622	0.909525	0.929252	0.955876	0.935186	0.965338	0.948498	0.966622	0.958602	0.947536	0.949942	0.944489	0.940639	0.931337	0.966301	0.939838	0.89477	0.948017	0.944168	0.929573	0.815059	0.969669	0.94497	0.949461	0.951706
cg00796728	0.0393358	0.0449551	0.0354335	0.0383992	0.0408967	0.0387114	0.0427698	0.0337164	0.0371505	0.0355895	0.0379309	0.0334042	0.0330921	0.0348091	0.0315311	0.0357456	0.0391797	0.0377749	0.0330921	0.0421455	0.0318433	0.0387114	0.0369944	0.0369944	0.0377749	0.0427698	0.0482331	0.0340286	0.0405845	0.0335603	0.0359017	0.0324677	0.0359017	0.0355895	0.0360578	0.0371505	0.043082	0.0511989	0.0324677	0.0407406	0.044643	0.0388675	0.0402723	0.0348091	0.0468283	0.0338725	0.15422	0.0309067	0.0362139
cg00798206	0.0382603	0.0274648	0.0316999	0.0405854	0.0486405	0.0497201	0.0390907	0.0483084	0.0452358	0.0285443	0.0209875	0.0344403	0.0257209	0.0312847	0.0284613	0.0351046	0.0426615	0.0385924	0.0288765	0.0356859	0.0227314	0.0303712	0.0366824	0.0460662	0.0401702	0.0406685	0.0483914	0.0238939	0.112251	0.0225653	0.0247244	0.0292917	0.0213196	0.0361842	0.0382603	0.041665	0.0491388	0.0406685	0.0261361	0.0430767	0.0512979	0.0402533	0.0323643	0.0335268	0.0353538	0.029873	0.0329455	0.021984	0.0439071
cg00800095	0.870879	0.930681	0.896002	0.89729	0.912751	0.89976	0.90749	0.924561	0.918119	0.907275	0.924668	0.92338	0.922306	0.878824	0.626304	0.907275	0.888809	0.87614	0.888809	0.878072	0.923273	0.917368	0.926708	0.907383	0.735064	0.927245	0.917475	0.9368	0.898794	0.926601	0.929822	0.917045	0.921447	0.91318	0.898042	0.856814	0.794006	0.863793	0.921555	0.888272	0.912751	0.91565	0.889238	0.922092	0.921018	0.613635	0.904806	0.170114	0.895143
cg00804048	0.0232991	0.0386761	0.0385382	0.052812	0.028126	0.0378487	0.0205409	0.0530878	0.0399173	0.0652239	0.0253678	0.0199893	0.0232302	0.0444684	0.0216442	0.0500538	0.0345388	0.0430203	0.0195755	0.0277812	0.0267469	0.0623968	0.0268848	0.0292293	0.021989	0.0359869	0.0433651	0.0258505	0.041986	0.0329529	0.0417102	0.0220579	0.0171621	0.0266779	0.0541221	0.0297809	0.0338493	0.0355042	0.031229	0.0290224	0.03116	0.02654	0.0363317	0.0297809	0.0262642	0.0402621	0.0376418	0.0146797	0.0357111
cg00804392	0.692686	0.808702	0.71477	0.881249	0.524309	0.846374	0.787717	0.788916	0.689789	0.497728	0.777125	0.684992	0.726862	0.872256	0.743949	0.596456	0.654115	0.872555	0.71467	0.587763	0.841478	0.709074	0.665206	0.882948	0.751044	0.796711	0.661209	0.662309	0.828787	0.68779	0.796211	0.650517	0.235919	0.867359	0.637227	0.570375	0.734456	0.651217	0.784719	0.813598	0.778024	0.672601	0.744549	0.559683	0.657412	0.638526	0.758139	0.812099	0.638726
cg00806490	0.533262	0.0993051	0.14536	0.56915	0.560113	0.657175	0.481299	0.471219	0.628587	0.613814	0.655698	0.56524	0.501893	0.106431	0.0762778	0.11625	0.635799	0.497896	0.246159	0.347305	0.719653	0.664475	0.526484	0.100348	0.532219	0.711659	0.584183	0.635104	0.727909	0.452275	0.791429	0.296471	0.126851	0.114686	0.139885	0.518403	0.655438	0.600606	0.585834	0.114164	0.633018	0.638667	0.669254	0.474694	0.665431	0.497809	0.611555	0.452449	0.45914
cg00807586	0.173459	0.0398329	0.0427654	0.0384644	0.0390509	0.0377801	0.0371936	0.0376824	0.608844	0.0497058	0.0358251	0.0368026	0.093694	0.0414947	0.0334791	0.0390509	0.146382	0.0372914	0.0375846	0.0387576	0.0351408	0.0406149	0.0383666	0.0414947	0.0388554	0.0386599	0.10083	0.033088	0.0406149	0.0346521	0.0403217	0.0578192	0.0357273	0.0412992	0.0415924	0.216177	0.0397351	0.0387576	0.032306	0.0378779	0.0743392	0.499949	0.0392464	0.082648	0.0399306	0.0380734	0.672578	0.0383666	0.0423744
cg00808492	0.546084	0.231277	0.91024	0.633355	0.468761	0.288013	0.302295	0.279246	0.313524	0.709496	0.292741	0.342484	0.317267	0.820309	0.226155	0.510328	0.26782	0.655025	0.324064	0.418821	0.208425	0.360411	0.323571	0.391734	0.82809	0.307122	0.345439	0.345242	0.385824	0.978303	0.876651	0.450538	0.786031	0.312244	0.945306	0.551895	0.451523	0.366715	0.273927	0.25403	0.227041	0.305447	0.791547	0.395575	0.449455	0.70201	0.304265	0.233542	0.430346
cg00810495	0.0515356	0.0656598	0.0542227	0.0539471	0.065522	0.0682091	0.0423721	0.0587011	0.0590456	0.0713095	0.036309	0.0396161	0.0347932	0.0481596	0.0344487	0.0830912	0.051949	0.0578054	0.0413386	0.0488486	0.0341731	0.1132	0.0442324	0.0539471	0.0573231	0.0610436	0.0739966	0.0378248	0.0454036	0.0365846	0.0416831	0.0381004	0.0347243	0.0669689	0.0720674	0.051949	0.057392	0.0651087	0.0354133	0.0462304	0.0523624	0.0464371	0.0633862	0.0593901	0.0486419	0.0725497	0.064213	0.0309349	0.0505021
cg00811081	0.0300216	0.0530814	0.0414335	0.0305725	0.0305725	0.0308086	0.0321465	0.0391511	0.0329336	0.0580397	0.025929	0.0233319	0.0229383	0.0275031	0.025929	0.0345076	0.0326975	0.0370261	0.0271096	0.0273457	0.0275818	0.0572527	0.0379705	0.0275818	0.0359243	0.0419057	0.0470213	0.0282114	0.0378918	0.0265587	0.0402529	0.0310447	0.0299429	0.0341141	0.0570953	0.0342715	0.0353734	0.0319891	0.0249846	0.0260864	0.0294707	0.0247485	0.0380492	0.0344289	0.023017	0.0329336	0.0440306	0.0238041	0.0314382
cg00812502	0.0170996	0.0148602	0.0141436	0.0183537	0.0153081	0.0202347	0.0144124	0.0125313	0.0126209	0.0129792	0.0124417	0.0138749	0.0140541	0.0152185	0.0123521	0.0162039	0.0146811	0.0138749	0.0140541	0.0185328	0.0123521	0.0164726	0.0137853	0.0155768	0.0143228	0.0185328	0.0122626	0.0139645	0.0149498	0.011546	0.0117251	0.0129792	0.0143228	0.0148602	0.015756	0.0228324	0.0153977	0.0247135	0.0126209	0.016383	0.015756	0.0161143	0.0162039	0.015129	0.0144124	0.0443304	0.0136062	0.0118147	0.0143228
cg00815440	0.0090737	0.00851896	0.0095668	0.0102448	0.00999827	0.0095668	0.00882715	0.00796422	0.00888878	0.00876551	0.00987499	0.00895042	0.00870387	0.0103065	0.00827241	0.00876551	0.0101832	0.0155457	0.00851896	0.00925861	0.00833404	0.00962844	0.00876551	0.00882715	0.00932025	0.00932025	0.00913534	0.0085806	0.00882715	0.00808749	0.00888878	0.0085806	0.00876551	0.00999827	0.00876551	0.00975171	0.00938189	0.0103065	0.00975171	0.00944353	0.00944353	0.00925861	0.00993663	0.00870387	0.0090737	0.00901206	0.00925861	0.00765603	0.00882715
cg00815583	0.0421673	0.0453923	0.0469634	0.0386943	0.0496923	0.0353039	0.0453096	0.0370404	0.0407615	0.0559768	0.0406789	0.036875	0.0403481	0.0470461	0.0441519	0.0588711	0.03795	0.0423327	0.0351385	0.0445654	0.036627	0.184811	0.0402654	0.0337327	0.0424981	0.0467154	0.0423327	0.0462192	0.0378673	0.045475	0.0472942	0.0377019	0.0393558	0.0402654	0.0444	0.0423327	0.0404308	0.0401827	0.0447308	0.0458884	0.0461365	0.0413404	0.0491134	0.0467154	0.0420019	0.0597807	0.0449788	0.0326577	0.0443173
cg00816620	0.227457	0.192954	0.204288	0.220123	0.259292	0.287794	0.174453	0.180287	0.204955	0.289794	0.164452	0.13795	0.0909471	0.114115	0.116949	0.135617	0.233124	0.207789	0.12745	0.249791	0.065112	0.321296	0.165786	0.133283	0.145451	0.13645	0.284461	0.188621	0.152785	0.144284	0.0981143	0.154785	0.414803	0.102781	0.265793	0.312463	0.282627	0.310296	0.131117	0.0937807	0.253625	0.210789	0.167286	0.287627	0.165286	0.184454	0.201455	0.0551113	0.223123
cg00818693	0.0537289	0.0456822	0.0515496	0.0550701	0.0559083	0.0510467	0.0500409	0.0509629	0.0543995	0.0502085	0.0533937	0.0512982	0.0480292	0.0487836	0.0477777	0.0500409	0.0507952	0.0533098	0.0503761	0.052304	0.0481968	0.0511305	0.0501247	0.049035	0.0480292	0.0485321	0.273169	0.410047	0.0502085	0.0478616	0.0460175	0.0492865	0.0466881	0.0492865	0.0507952	0.049035	0.0510467	0.386242	0.0475263	0.0567465	0.0497056	0.0530584	0.0523878	0.0472748	0.0507114	0.0512143	0.430667	0.0458499	0.0487836
cg00818872	0.0518589	0.0500862	0.0466341	0.0406629	0.0521388	0.0632415	0.0484068	0.0512058	0.148331	0.0552177	0.237805	0.0396366	0.0373974	0.0449547	0.0374907	0.0415026	0.04878	0.0451413	0.0423423	0.0471006	0.0304933	0.0629616	0.212428	0.0457011	0.0443016	0.724364	0.0574569	0.323361	0.112784	0.0372108	0.126126	0.0460743	0.033852	0.0388902	0.0640812	0.0615621	0.0453279	0.0713585	0.0379572	0.0415959	0.045981	0.0924443	0.0387969	0.0491532	0.0523254	0.0499929	0.616602	0.0280675	0.04878
cg00819310	0.663726	0.369152	0.828986	0.397565	0.860913	0.339333	0.460817	0.357304	0.793645	0.644851	0.395758	0.403087	0.34114	0.722963	0.295558	0.499973	0.345156	0.592041	0.322365	0.593747	0.284113	0.666538	0.362124	0.281803	0.937418	0.445757	0.654188	0.876676	0.85278	0.759107	0.645956	0.7575	0.878081	0.578788	0.743946	0.549772	0.846054	0.413027	0.527082	0.534812	0.632301	0.871355	0.481199	0.427685	0.425577	0.59686	0.636719	0.74244	0.680795
cg00819362	0.883384	0.95573	0.934	0.943937	0.917437	0.932542	0.963018	0.941155	0.976665	0.928434	0.937312	0.930952	0.919159	0.9817	0.919954	0.923267	0.884709	0.940625	0.902067	0.876626	0.7958	0.930554	0.910017	0.931615	0.95467	0.954272	0.93559	0.935722	0.950827	0.901934	0.922604	0.944202	0.918232	0.910679	0.916112	0.905114	0.914787	0.914124	0.95891	0.902199	0.932012	0.95891	0.882721	0.906572	0.950032	0.939565	0.914389	0.927639	0.932675
cg00819696	0.0147915	0.016587	0.0158175	0.014022	0.020178	0.0183825	0.0117134	0.00658335	0.00914839	0.0173565	0.0104309	0.00940489	0.0132524	0.0122264	0.0127394	0.0158175	0.0194085	0.014535	0.0117134	0.018639	0.0109439	0.0209476	0.0199215	0.0117134	0.0171	0.0273602	0.015561	0.0117134	0.0204346	0.0109439	0.016587	0.016074	0.0163305	0.0147915	0.019665	0.018639	0.0171	0.0114569	0.0119699	0.0158175	0.0106874	0.0137655	0.0158175	0.016074	0.015561	0.016587	0.014535	0.0127394	0.0129959
cg00821764	0.0321801	0.0236613	0.0277179	0.0218358	0.0319773	0.0344112	0.0305575	0.0297461	0.0307603	0.0338027	0.0189962	0.0258924	0.0194019	0.0265009	0.0157509	0.0291377	0.0289348	0.0279207	0.0265009	0.029949	0.0183877	0.0394819	0.0311659	0.0335999	0.0325857	0.0240669	0.0234584	0.0212273	0.0283263	0.0175764	0.0187934	0.0289348	0.0198075	0.0329914	0.0449583	0.0338027	0.028732	0.0362367	0.0238641	0.0273122	0.0277179	0.0307603	0.028732	0.0331942	0.0242698	0.0307603	0.0394819	0.0141283	0.0323829
cg00822607	0.0454661	0.0464315	0.0544183	0.0460805	0.0546816	0.0629316	0.0627561	0.0508199	0.0588944	0.0486257	0.0433597	0.044764	0.0287905	0.0498544	0.0331788	0.0581922	0.0553837	0.0612641	0.0478358	0.0497667	0.0341443	0.067671	0.043272	0.0461682	0.0584555	0.0818014	0.0746923	0.0359874	0.0523997	0.0358118	0.0350219	0.0467826	0.0341443	0.0537162	0.0420432	0.0552082	0.0639848	0.0536284	0.0548571	0.0590699	0.0536284	0.0514342	0.0490645	0.0527507	0.0545938	0.0971605	0.0662667	0.0280884	0.0510832
cg00824109	0.0174055	0.0289649	0.0189014	0.0195814	0.0187654	0.0218933	0.0248851	0.0186294	0.0183574	0.0233892	0.0194454	0.0169975	0.0224372	0.0187654	0.0203973	0.0172695	0.0199894	0.0176775	0.0165895	0.0228452	0.0195814	0.0176775	0.0183574	0.0164536	0.0228452	0.0307328	0.0220293	0.0206693	0.0197174	0.0165895	0.0255651	0.0194454	0.0212133	0.0184934	0.0221652	0.0180855	0.0142777	0.0178135	0.0232532	0.0254291	0.0184934	0.0169975	0.0198534	0.0190374	0.0195814	0.0171335	0.0214853	0.0197174	0.0183574
cg00826384	0.024205	0.175682	0.510355	0.0328556	0.436013	0.642188	0.0413261	0.591365	0.574875	0.519006	0.550815	0.555591	0.0325853	0.029882	0.381226	0.0393436	0.581633	0.303099	0.0202401	0.177304	0.0184378	0.429075	0.0267281	0.0283501	0.0782717	0.663094	0.31968	0.499181	0.113145	0.298774	0.729055	0.10152	0.176042	0.024205	0.0429481	0.397356	0.440068	0.52225	0.413125	0.0284402	0.552347	0.507472	0.0350183	0.372124	0.032315	0.2958	0.622093	0.347704	0.0717837
cg00827369	0.051481	0.0293597	0.0468239	0.0215978	0.0584667	0.0371216	0.0332406	0.0336287	0.05575	0.0631238	0.0293597	0.0448834	0.0173288	0.0351811	0.0239264	0.0646762	0.0417787	0.0553619	0.0258668	0.0289716	0.014224	0.0584667	0.0378977	0.0604072	0.0340168	0.0258668	0.018105	0.0169407	0.0340168	0.0215978	0.0363454	0.0204335	0.0227621	0.0526453	0.0798118	0.043331	0.0491524	0.0541977	0.0351811	0.0635119	0.0561381	0.0444953	0.0363454	0.0413906	0.0278073	0.047212	0.047212	0.00762646	0.0441072
cg00828602	0.0519674	0.482503	0.0610151	0.046866	0.492224	0.736415	0.0511974	0.0500423	0.760863	0.0525449	0.764425	0.392218	0.423308	0.0485023	0.0474435	0.0551437	0.418688	0.0487911	0.0482136	0.28355	0.0503311	0.291635	0.0507161	0.0496573	0.530532	0.810915	0.690888	0.739111	0.047251	0.047251	0.169395	0.0708328	0.238793	0.0536037	0.0550474	0.23552	0.0483098	0.620239	0.0515824	0.0495611	0.152454	0.681841	0.0488873	0.0558175	0.605031	0.231189	0.795899	0.502331	0.0741053
cg00830029	0.524244	0.413653	0.370794	0.212079	0.568804	0.276975	0.299741	0.283294	0.828874	0.380436	0.480494	0.328584	0.254451	0.248537	0.257125	0.34819	0.317241	0.214752	0.341547	0.327368	0.180076	0.212565	0.413977	0.408144	0.239139	0.567022	0.728168	0.812995	0.201222	0.300065	0.679071	0.475471	0.428156	0.178618	0.301523	0.435609	0.263688	0.517681	0.288398	0.248699	0.399394	0.825633	0.325586	0.365447	0.402797	0.264336	0.839083	0.167275	0.638318
cg00830393	0.0342621	0.0320561	0.0385691	0.0220766	0.0360479	0.0292198	0.0344722	0.0354176	0.0320561	0.0419306	0.0240725	0.0238624	0.0211311	0.0258583	0.0188201	0.0319511	0.0272239	0.0293249	0.0254381	0.0250179	0.020711	0.0491789	0.0331066	0.0286946	0.0343672	0.0253331	0.0348924	0.0212362	0.0270138	0.0196605	0.020816	0.0272239	0.0217614	0.0328965	0.0532757	0.0302703	0.0311107	0.0323713	0.0220766	0.0271189	0.0281693	0.027329	0.0227069	0.0315309	0.0272239	0.0325813	0.0370984	0.0188201	0.0358378
cg00831028	0.0461385	0.0366745	0.0690185	0.0470745	0.0541465	0.0410425	0.0632985	0.0397945	0.0401065	0.0688105	0.0410425	0.0434345	0.0456185	0.0492585	0.0464505	0.0654825	0.0482185	0.0553945	0.0372985	0.0410425	0.0553945	0.0547705	0.0512345	0.0471785	0.0611145	0.0428105	0.0392745	0.0401065	0.0667305	0.0516505	0.0432265	0.0483225	0.0557065	0.0694345	0.0718265	0.0463465	0.0494665	0.0430185	0.0412505	0.0605945	0.0382345	0.0419785	0.0441625	0.0528985	0.0416665	0.0719305	0.0609065	0.0441625	0.0680825
cg00832517	0.0758908	0.0583977	0.0911973	0.167365	0.0689665	0.0638643	0.0853662	0.0766197	0.0514734	0.086824	0.0558466	0.0343447	0.0791708	0.13165	0.0580333	0.0871884	0.0798996	0.14805	0.0489223	0.101402	0.11197	0.0580333	0.0434557	0.121081	0.059491	0.130557	0.0664154	0.0580333	0.0941128	0.0423624	0.118895	0.0551178	0.0285137	0.0558466	0.0766197	0.0660509	0.0962994	0.0467357	0.0857307	0.10541	0.104317	0.062771	0.153152	0.0645932	0.0667798	0.0543889	0.0766197	0.0514734	0.0711531
cg00833393	0.0334382	0.0281305	0.0337176	0.0270131	0.0423776	0.0446124	0.0527137	0.0323208	0.0409808	0.0454505	0.0295272	0.030924	0.030086	0.0205879	0.0292479	0.0393047	0.0367905	0.0312034	0.0314827	0.0270131	0.0281305	0.030086	0.0407014	0.0342763	0.0468473	0.030086	0.034835	0.0217053	0.0437744	0.030924	0.0479647	0.030924	0.0457298	0.0546692	0.034835	0.0390253	0.0501995	0.0353937	0.038746	0.0353937	0.0264543	0.0451711	0.0236608	0.0440537	0.0281305	0.0373492	0.0460092	0.0147214	0.0379079
cg00833777	0.672535	0.270212	0.721135	0.317533	0.572045	0.64659	0.634897	0.371706	0.792117	0.384222	0.55816	0.274962	0.440039	0.596437	0.615987	0.726616	0.744979	0.512117	0.383308	0.441592	0.737122	0.403132	0.38477	0.227732	0.506819	0.526003	0.262355	0.663308	0.738401	0.652802	0.360652	0.707158	0.373259	0.512117	0.495856	0.548842	0.435837	0.269846	0.367686	0.424691	0.694825	0.532763	0.262355	0.522714	0.435837	0.317716	0.644307	0.43739	0.481879
cg00834796	0.0746136	0.0749147	0.216607	0.0553466	0.0927768	0.0563501	0.0564505	0.110237	0.208078	0.135224	0.060063	0.0438065	0.0474191	0.0453117	0.0449103	0.0666861	0.0545438	0.294478	0.077022	0.0601634	0.0418999	0.114141	0.0692951	0.0755168	0.0638763	0.0777244	0.0610665	0.650014	0.053741	0.0394915	0.05344	0.0542428	0.0506302	0.057454	0.114653	0.077022	0.0651808	0.0779251	0.0543431	0.111442	0.101909	0.049125	0.0630735	0.0579557	0.0700979	0.0967907	0.0917733	0.0386887	0.0592602
cg00834958	0.034119	0.0560892	0.0395549	0.0379695	0.0384225	0.0266446	0.0273241	0.0347985	0.0300421	0.0295891	0.0257386	0.0298156	0.0418199	0.0080719	0.0275506	0.0289096	0.0293626	0.0440849	0.0311746	0.0275506	0.0347985	0.0323071	0.0255121	0.0415934	0.0298156	0.033213	0.0191702	0.0429524	0.0270976	0.0252857	0.0397814	0.0273241	0.0538242	0.0227942	0.0257386	0.0318541	0.038649	0.0291361	0.033666	0.0329865	0.03729	0.0246062	0.0237002	0.0273241	0.0277771	0.0347985	0.0366105	0.033666	0.0325335
cg00836605	0.0369915	0.0342033	0.0423687	0.041572	0.0391822	0.0374894	0.038286	0.0342033	0.0349999	0.0354978	0.0354978	0.0369915	0.0362944	0.0366927	0.0364936	0.0365932	0.0384851	0.0370911	0.0352987	0.0383856	0.0347012	0.038983	0.0366927	0.0372902	0.0392818	0.200697	0.0353982	0.0336058	0.0369915	0.0349003	0.0339046	0.0962402	0.0360953	0.0359957	0.0357965	0.0386843	0.0353982	0.0410742	0.0351991	0.0409746	0.0403771	0.0392818	0.0424682	0.0370911	0.0367923	0.0355974	0.0374894	0.0331079	0.038983
cg00838150	0.0383781	0.0372363	0.035116	0.0261451	0.0396829	0.0375626	0.0429451	0.0476752	0.042782	0.0486538	0.0209257	0.0315276	0.0271237	0.0308752	0.0250034	0.0387043	0.0328325	0.0329956	0.0338111	0.0282655	0.0238616	0.0568091	0.0349529	0.0468596	0.0416402	0.0287548	0.0484907	0.0269606	0.0380519	0.0258189	0.0279393	0.0341373	0.0331587	0.0377257	0.0613761	0.0409878	0.029081	0.0334849	0.0320169	0.0329956	0.030549	0.0395198	0.033648	0.038215	0.0450654	0.0395198	0.0419664	0.0207626	0.0434344
cg00839584	0.158824	0.136378	0.456126	0.110047	0.26609	0.114903	0.146198	0.141342	0.176738	0.362997	0.189364	0.134328	0.133464	0.184723	0.129256	0.183752	0.1544	0.134867	0.1285	0.182889	0.113608	0.155695	0.165946	0.128608	0.14663	0.189364	0.421378	0.206522	0.113608	0.568357	0.136594	0.68145	0.396666	0.107025	0.170047	0.260371	0.135731	0.250335	0.159364	0.120838	0.155155	0.223356	0.141882	0.254975	0.145874	0.133033	0.281414	0.105838	0.210623
cg00839802	0.0223825	0.0386375	0.0265167	0.0265167	0.0660739	0.018812	0.0330939	0.0520738	0.0392953	0.0290536	0.0125167	0.0189999	0.0112952	0.0152415	0.0127046	0.0290536	0.0205033	0.032906	0.0201274	0.0345973	0.0086643	0.0199395	0.0286778	0.0246375	0.0266107	0.0488792	0.051698	0.0196576	0.0200335	0.0105435	0.0104495	0.0189059	0.00969786	0.0228523	0.0144898	0.0254831	0.0253892	0.0182482	0.0168388	0.0228523	0.0246375	0.0267046	0.0214429	0.021067	0.016463	0.02351	0.0267986	0.00716094	0.0170267
cg00840403	0.342562	0.169218	0.250447	0.824086	0.166994	0.141712	0.151895	0.214748	0.147447	0.374398	0.166057	0.129656	0.469907	0.729045	0.124857	0.178113	0.144638	0.908359	0.141244	0.267419	0.243893	0.190871	0.210066	0.151076	0.28954	0.334603	0.172612	0.122048	0.171207	0.166291	0.125911	0.381889	0.124389	0.897824	0.219196	0.242488	0.418641	0.161259	0.181039	0.170388	0.322898	0.228443	0.171441	0.18022	0.406351	0.168281	0.386805	0.621129	0.190052
cg00840516	0.462699	0.355021	0.422206	0.244321	0.615604	0.294483	0.50984	0.402162	0.657003	0.471865	0.625475	0.396924	0.399039	0.356834	0.33558	0.446784	0.36459	0.26497	0.420897	0.41304	0.313521	0.357438	0.426941	0.252984	0.494126	0.449	0.55003	0.450914	0.270208	0.406594	0.404176	0.569068	0.502285	0.270812	0.428351	0.461893	0.391988	0.548016	0.443057	0.310801	0.398233	0.475189	0.370734	0.501076	0.460987	0.406392	0.517898	0.328328	0.575111
cg00841581	0.0322997	0.0418997	0.0309283	0.0314426	0.0247569	0.0252712	0.0247569	0.022014	0.0249283	0.0214997	0.0235569	0.0266426	0.0238997	0.0276711	0.020814	0.0266426	0.023214	0.0252712	0.025614	0.0317854	0.0197855	0.0237283	0.0281854	0.0382997	0.0271569	0.0297283	0.0386425	0.0175569	0.0228712	0.0201283	0.0218426	0.0226997	0.024414	0.0233854	0.0262997	0.0266426	0.0310997	0.0319568	0.024414	0.0264712	0.040014	0.0257854	0.0389854	0.0202997	0.0326426	0.0302426	0.0273283	0.0163569	0.0254426
cg00842351	0.686275	0.805278	0.875926	0.887701	0.457184	0.765267	0.87947	0.825855	0.825512	0.814538	0.785387	0.750864	0.844603	0.730058	0.789045	0.779786	0.824941	0.820825	0.685132	0.81328	0.67793	0.71714	0.740461	0.825284	0.862665	0.830314	0.649007	0.716569	0.830199	0.816253	0.897646	0.830771	0.2497	0.862665	0.698164	0.549438	0.802306	0.798076	0.882899	0.768811	0.789274	0.577674	0.80825	0.649465	0.720112	0.757494	0.775556	0.739661	0.804135
cg00846036	0.172291	0.178177	0.160037	0.1391	0.444385	0.165634	0.110925	0.208088	0.709339	0.17644	0.712041	0.154055	0.0930753	0.113048	0.100891	0.20172	0.124723	0.144117	0.144406	0.136784	0.0773478	0.226228	0.797432	0.129644	0.110636	0.685796	0.158204	0.810651	0.580046	0.125398	0.160134	0.199887	0.176054	0.0960664	0.234815	0.177984	0.154731	0.162257	0.120864	0.169397	0.148459	0.728926	0.168818	0.21407	0.119802	0.132539	0.736549	0.127135	0.330723
cg00848394	0.0296612	0.0252857	0.0294424	0.0202538	0.0449756	0.0290049	0.0300987	0.0283485	0.0320677	0.0342555	0.0268171	0.0250669	0.0158782	0.0226603	0.0163158	0.0427878	0.0237542	0.0248481	0.0209101	0.0174097	0.0169721	0.0377559	0.0309739	0.0329429	0.0395062	0.0209101	0.0340367	0.0152219	0.0272546	0.0202538	0.0248481	0.02988	0.0167533	0.0305363	0.0570083	0.0281298	0.023973	0.0270359	0.0224415	0.0329429	0.025942	0.023973	0.0235354	0.027911	0.0268171	0.0150031	0.0473821	0.00800226	0.0401625
cg00848397	0.0329565	0.0292029	0.0314551	0.0282645	0.0489094	0.025637	0.0335196	0.0325812	0.0348334	0.0299537	0.020945	0.0284522	0.0252616	0.0237602	0.0239479	0.030329	0.03915	0.0327689	0.0265754	0.0310797	0.0186928	0.0361471	0.0357718	0.0402761	0.0374609	0.0515369	0.0425283	0.0207573	0.0408391	0.0177544	0.020945	0.0278892	0.025074	0.035021	0.0331442	0.0325812	0.0340826	0.035021	0.0329565	0.0378362	0.034458	0.0370855	0.0346457	0.0327689	0.0263877	0.0307044	0.0361471	0.0188805	0.0357718
cg00848728	0.374657	0.42625	0.551479	0.314365	0.416564	0.54802	0.556421	0.577671	0.522025	0.480908	0.560276	0.50117	0.434256	0.395709	0.60584	0.439692	0.489705	-0.0397741	0.526967	0.287085	0.613451	0.450762	0.49524	0.273643	0.53863	0.619381	0.339371	0.513624	0.621753	0.520147	0.705074	0.429117	0.234899	-0.0536115	0.246265	0.297167	0.504728	0.403023	0.611276	0.467367	0.505124	0.486443	0.340656	0.423878	0.486443	0.321877	0.565217	0.50206	0.366947
cg00849368	0.103096	0.0519383	0.0556929	0.372775	0.0532524	0.0505303	0.0601985	0.0490284	0.0492161	0.0529708	0.0475265	0.0448983	0.0590721	0.0492161	0.047902	0.0489345	0.0503425	0.0525015	0.0457431	0.0601985	0.0453676	0.0555991	0.0500609	0.0527831	0.059166	0.274778	0.0594476	0.0475265	0.052126	0.0477143	0.0717442	0.0527831	0.0487468	0.0728706	0.0503425	0.0464001	0.0558807	0.0495916	0.0421761	0.0451799	0.0544727	0.0499671	0.206818	0.0526892	0.0583212	0.0580396	0.0537217	0.0402049	0.0617943
cg00850538	0.535761	0.231577	0.741018	0.582167	0.736799	0.610493	0.351081	0.333431	0.373638	0.335325	0.241737	0.60395	0.431927	0.448802	0.242253	0.373725	0.668007	0.26197	0.32198	0.493573	0.269718	0.281256	0.799048	0.525257	0.401362	0.446822	0.520263	0.50907	0.207384	0.486513	0.706492	0.768397	0.661894	0.671709	0.466796	0.618156	0.605758	0.632534	0.598181	0.273937	0.520177	0.77847	0.308979	0.660947	0.651045	0.555649	0.895735	0.779503	0.539032
cg00852964	0.14501	0.188815	0.14817	0.129319	0.313801	0.128011	0.162772	0.137056	0.32971	0.222813	0.119076	0.125832	0.108615	0.121255	0.123653	0.202872	0.151984	0.14817	0.131062	0.146209	0.0874754	0.174322	0.198622	0.162445	0.146645	0.491091	0.443908	0.141959	0.136293	0.132479	0.104801	0.136947	0.133896	0.199603	0.265855	0.183258	0.219544	0.207884	0.140434	0.133133	0.203744	0.147516	0.136402	0.169637	0.124415	0.152311	0.223576	0.0786491	0.163099
cg00853068	0.283624	0.642929	0.372641	0.20618	0.19384	0.529231	0.433065	0.246178	0.557741	0.509147	0.675013	0.454766	0.231966	0.142778	0.663694	0.156905	0.295283	0.645993	0.193669	0.213498	0.133246	0.630674	0.191287	0.166011	0.31392	0.59408	0.222945	0.633993	0.731266	0.644802	0.529231	0.525061	0.333068	0.225924	0.159032	0.419448	0.172394	0.498509	0.5277	0.180649	0.621398	0.593995	0.501147	0.308303	0.392045	0.138948	0.428129	0.455617	0.407619
cg00854637	0.0568062	0.0679622	0.0648569	0.0726776	0.0822234	0.0554261	0.0691123	0.0793481	0.0926893	0.0749778	0.0558861	0.0706074	0.043005	0.0478354	0.0367945	0.0702624	0.0630167	0.0747478	0.0823384	0.0688823	0.04266	0.0762429	0.066237	0.0643969	0.0701474	0.0857887	0.0783131	0.0524358	0.0645119	0.0374846	0.0442701	0.0563462	0.0464553	0.0557711	0.0623267	0.0597965	0.0530109	0.0604865	0.0535859	0.0718725	0.0732526	0.0588764	0.0686522	0.065547	0.0585314	0.0635918	0.0665821	0.0388647	0.0669271
cg00854995	0.0466942	0.0370241	0.0466942	0.0556567	0.0693363	0.0417412	0.0476376	0.0580152	0.0438639	0.053534	0.0415053	0.0365523	0.0382033	0.0417412	0.0247595	0.0523547	0.043628	0.0573077	0.0334862	0.0532981	0.0337221	0.0547133	0.0358448	0.048581	0.0372599	0.0540057	0.0474017	0.0320711	0.0433922	0.0349013	0.0405619	0.0440997	0.0365523	0.0398543	0.0478734	0.0481093	0.0412695	0.0337221	0.0716949	0.0613172	0.0632041	0.0511754	0.0530623	0.04693	0.041977	0.0443356	0.0393826	0.0349013	0.0393826
cg00856375	0.0392507	0.0568466	0.0358761	0.0309348	0.0432278	0.0420226	0.0362377	0.0556414	0.0427457	0.0421431	0.023342	0.0267166	0.0258729	0.0338273	0.0235831	0.041179	0.0318989	0.0405764	0.0281628	0.0316579	0.0239446	0.074563	0.0328631	0.0356351	0.0364787	0.0326221	0.0433483	0.0270781	0.0357556	0.0298501	0.0290065	0.0302117	0.0224984	0.0341888	0.0657651	0.0457587	0.0328631	0.0631136	0.0318989	0.0426252	0.0317784	0.0312963	0.0347914	0.0355145	0.0239446	0.0318989	0.0402148	0.0161108	0.0337067
cg00858899	0.0714482	0.0690275	0.0657999	0.0773655	0.0797862	0.0803242	0.0601515	0.0666068	0.0762896	0.0805931	0.0633792	0.0545032	0.0762896	0.0609584	0.073062	0.0701034	0.0606895	0.0571929	0.0496618	0.0504687	0.0612274	0.0706413	0.0671447	0.0641861	0.0531584	0.0714482	0.0577308	0.0698344	0.0574619	0.0663378	0.0970002	0.056386	0.0800552	0.0690275	0.0655309	0.0784414	0.0762896	0.0781724	0.0787104	0.0625723	0.0738689	0.0805931	0.0609584	0.0539653	0.04751	0.0512756	0.0510066	0.0606895	0.0741379
cg00859655	0.677314	0.759231	0.859294	0.590552	0.749806	0.76619	0.668242	0.73677	0.841941	0.754827	0.882812	0.670003	0.797107	0.702858	0.36506	0.675464	0.735361	0.646749	0.665863	0.605438	0.734216	0.461599	0.855946	0.874268	0.7979	0.47534	0.582273	0.810584	0.508283	0.661195	0.861848	0.808998	0.777288	0.588703	0.833573	0.754739	0.611604	0.734744	0.854537	0.564568	0.87876	0.708407	0.708055	0.614511	0.693433	0.794905	0.837978	0.713164	0.836568
cg00861635	0.0534784	0.0501576	0.0368743	0.043005	0.0700825	0.0636963	0.0376406	0.0424941	0.0455595	0.038407	0.038407	0.040706	0.0325317	0.038407	0.033298	0.0399397	0.0463258	0.0414723	0.0378961	0.0307435	0.0361079	0.043005	0.0394288	0.0488803	0.0302326	0.0593537	0.0468367	0.0427496	0.0320208	0.0361079	0.0343198	0.0294663	0.0511793	0.0361079	0.0463258	0.0389179	0.0368743	0.0501576	0.0453041	0.055522	0.0573101	0.0396842	0.0409614	0.0345753	0.0695716	0.0417278	0.0491358	0.0253791	0.0417278
cg00862290	0.87237	0.89797	0.909647	0.944768	0.834555	0.91827	0.920605	0.915575	0.881622	0.696497	0.927791	0.838327	0.922761	0.899317	0.93848	0.737007	0.654909	0.935336	0.841202	0.83716	0.869316	0.850184	0.860244	0.897701	0.778865	0.924737	0.88809	0.923929	0.934977	0.876233	0.883149	0.845783	0.777427	0.908839	0.853418	0.815243	0.877131	0.855574	0.907491	0.90821	0.854226	0.911354	0.79638	0.820004	0.389032	0.862939	0.934528	0.693982	0.899587
cg00862770	0.035582	0.0332445	0.0301279	0.0231154	0.0492175	0.0538925	0.0418154	0.0663592	0.0363612	0.0484383	0.0145445	0.0114278	0.0051945	0.0231154	0.00285699	0.0371404	0.0301279	0.0476592	0.0258424	0.0188299	0.0102591	0.0570092	0.0270112	0.0499967	0.0238945	0.0398675	0.0410362	0.00597367	0.0348029	0.00909034	0.00831117	0.0301279	0.0129862	0.0332445	0.0581779	0.0398675	0.0605154	0.0453216	0.00947992	0.0379196	0.0246737	0.0363612	0.0246737	0.0480487	0.016882	0.042205	0.0406466	-0.0103889	0.0453216
cg00864867	0.043008	0.0438297	0.053142	0.0457469	0.0536898	0.0372563	0.0438297	0.0399952	0.0451992	0.0435558	0.0290395	0.0413647	0.0369824	0.0391735	0.0336957	0.0471164	0.0421863	0.0388996	0.0402691	0.0457469	0.0323262	0.0388996	0.0356129	0.0441036	0.0397213	0.0457469	0.0542376	0.0394474	0.0358868	0.032874	0.0383518	0.0476642	0.0356129	0.0399952	0.0460208	0.048212	0.0391735	0.0457469	0.040543	0.0380779	0.0542376	0.0906653	0.0399952	0.058346	0.0399952	0.0432819	0.0449253	0.030409	0.0465686
cg00870662	0.0327734	0.0420413	0.0385107	0.0368336	0.517795	0.0322438	0.0390403	0.0318025	0.0286249	0.0352448	0.457863	0.0321555	0.0366571	0.036304	0.0355096	0.0335678	0.0361275	0.0348918	0.0281836	0.0404525	0.0337443	0.0391285	0.0288014	0.0327734	0.0358627	0.0345387	0.0292428	0.454509	0.0355979	0.0370984	0.0367454	0.0348918	0.0308315	0.0406291	0.0336561	0.034627	0.0297723	0.031979	0.0320673	0.0330382	0.0403643	0.422203	0.0419531	0.0408056	0.0351566	0.0355096	0.0470725	0.0290662	0.0337443
cg00871453	0.0471479	0.0501729	0.0543863	0.0487684	0.0731847	0.0437987	0.0495247	0.0467157	0.0511452	0.0421782	0.0293219	0.0346156	0.0247843	0.032779	0.0310504	0.0482282	0.0372085	0.0427184	0.0374246	0.032779	0.0261888	0.0495247	0.0442309	0.038721	0.0392612	0.0486604	0.0442309	0.0292138	0.0452032	0.0194905	0.0339674	0.0278093	0.0264049	0.0427184	0.0466077	0.0442309	0.0440148	0.0461755	0.0313745	0.0432586	0.0448791	0.0361282	0.0434746	0.0587078	0.0485523	0.0275933	0.0481202	0.0214352	0.0456354
cg00873037	0.0470595	0.0735965	0.0398987	0.0523248	0.064119	0.0403199	0.0441109	0.0377926	0.0363183	0.0723329	0.0373713	0.0350546	0.0369501	0.0733859	0.0552733	0.0685419	0.0371607	0.0660145	0.0268408	0.0542203	0.0251559	0.0618023	0.0382138	0.0293681	0.0327379	0.0506399	0.0514823	0.0535884	0.0575901	0.0468489	0.0479019	0.0342122	0.0281044	0.0380032	0.0649615	0.0434791	0.0356865	0.0314742	0.0409517	0.0797043	0.050008	0.0316848	0.0674888	0.0493762	0.0552733	0.0826528	0.0472701	0.0167314	0.0457958
cg00873937	0.0332393	0.027306	0.0367005	0.0322505	0.0375658	0.0322505	0.0336102	0.0292838	0.0363296	0.0353407	0.0260699	0.0261935	0.0285421	0.0291602	0.0239685	0.0370713	0.0341046	0.0292838	0.0286657	0.0300254	0.0229796	0.0430047	0.0349699	0.0345991	0.0338574	0.0326213	0.0369477	0.0316324	0.0373185	0.027924	0.0278004	0.0307671	0.0247101	0.0343519	0.0457241	0.0337338	0.035588	0.0386783	0.0261935	0.0320032	0.0374421	0.0453533	0.0258226	0.0326213	0.0348463	0.0352171	0.0344755	0.0219907	0.0357116
cg00874863	0.619577	0.200702	0.718368	0.550896	0.576578	0.617708	0.905027	0.477984	0.826014	0.872457	0.947436	0.869112	0.287094	0.594388	0.353709	0.829261	0.219102	0.564967	0.819618	0.856812	0.90237	0.372601	0.813026	0.536235	0.576381	0.807712	0.809385	0.507011	0.865963	0.881215	0.844316	0.927756	0.830343	0.966722	0.700164	0.480641	0.957276	0.692981	0.22658	0.917326	0.239765	0.929134	0.425735	0.56113	0.919491	0.550699	0.381752	1.00864	0.322025
cg00875272	0.0753777	0.0548275	0.0595029	0.0766825	0.149098	0.205312	0.0484123	0.0551537	0.15573	0.0612426	0.0765737	0.0410186	0.0533052	0.0684189	0.0346034	0.0639609	0.0563497	0.102561	0.0446067	0.0518917	0.0393876	0.452567	0.0575457	0.0595029	0.174214	0.362646	0.0753777	0.251414	0.0402575	0.0686363	0.0522179	0.0768999	0.0417797	0.236409	0.0758126	0.063091	0.0717896	0.0441718	0.0402575	0.228254	0.179977	0.24315	0.0466726	0.0575457	0.0725507	0.0898389	0.452132	0.0338423	0.0513481
cg00876704	0.017199	0.0147633	0.0185908	0.0111678	0.0234622	0.0197507	0.0220704	0.0149953	0.0197507	0.0138354	0.0103559	0.0119797	0.0120957	0.00908006	0.0109358	0.0167351	0.0181269	0.0152273	0.0119797	0.0130235	0.00989196	0.0189388	0.017315	0.0182429	0.016851	0.0115157	0.0167351	0.00896408	0.0181269	0.00942802	0.0105879	0.0111678	0.0117477	0.0161551	0.0163871	0.0165031	0.016851	0.0195187	0.0145314	0.0151113	0.0139514	0.0183589	0.0132555	0.0165031	0.0105879	0.0152273	0.0184748	0.00606446	0.017431
cg00877887	0.0568024	0.0572655	0.0559688	0.0577286	0.0575433	0.0612481	0.049856	0.0568024	0.467194	0.0584695	0.276771	0.0517084	0.0517084	0.0570802	0.0483741	0.0683797	0.0523567	0.0547648	0.0497634	0.0501339	0.0452251	0.0869033	0.0620816	0.0538386	0.0577286	0.383652	0.093294	0.603806	0.0598588	0.0496708	0.0500413	0.0572655	0.060785	0.0626373	0.0769932	0.0635635	0.0542091	0.0538386	0.0463365	0.0548574	0.0538386	0.503963	0.0545796	0.058099	0.047911	0.0543943	0.647985	0.0417056	0.0535608
cg00877964	0.0322599	0.0270785	0.030949	0.0318229	0.0306368	0.0302623	0.0310114	0.0291386	0.0297004	0.029638	0.0263294	0.0279525	0.0276404	0.0283271	0.0280774	0.0288889	0.030075	0.03432	0.0288889	0.0306993	0.0280149	0.0282646	0.0281398	0.0287016	0.0313235	0.0329466	0.0310738	0.0281398	0.0310738	0.0268913	0.030075	0.0328842	0.0274531	0.0308241	0.0293883	0.0301374	0.0294507	0.0284519	0.0272034	0.030949	0.0328842	0.030075	0.0328218	0.032572	0.0300126	0.029201	0.0303871	0.0277652	0.0289513
cg00881086	0.0433781	0.0405806	0.0463755	0.0395815	0.0517708	0.0371835	0.0471748	0.0361844	0.0467752	0.0417795	0.0301896	0.0317882	0.0313886	0.0411801	0.0261931	0.0315884	0.0367839	0.0403808	0.034386	0.0369837	0.02979	0.0319881	0.033187	0.0507717	0.0321879	0.0493729	0.0385823	0.0347856	0.0353851	0.0283912	0.0333869	0.0291905	0.0267926	0.0347856	0.0317882	0.0395815	0.0489733	0.0485736	0.0329872	0.0369837	0.0541687	0.0477743	0.05277	0.0431783	0.0347856	0.0399811	0.0399811	0.0281914	0.0379828
cg00881370	0.879686	0.876119	0.9299	0.918787	0.888879	0.951714	0.924138	0.942248	0.935388	0.913574	0.954184	0.887507	0.913162	0.907126	0.925784	0.940464	0.877628	0.932095	0.856637	0.919336	0.940327	0.907126	0.873101	0.931409	0.934565	0.94801	0.942659	0.932644	0.948147	0.919336	0.956105	0.905068	0.911241	0.916729	0.926333	0.865967	0.952675	0.894641	0.953498	0.918376	0.946775	0.939229	0.880372	0.876668	0.877217	0.920296	0.930586	0.907949	0.956242
cg00882451	0.810728	0.6612	0.597604	0.866033	0.923483	0.615844	0.728405	0.768103	0.899879	0.611065	0.941821	0.525133	0.787123	0.769176	0.647057	0.875397	0.887589	0.884273	0.766933	0.748986	0.429447	0.657981	0.886809	0.6612	0.651934	0.939772	0.930116	0.927092	0.691925	0.934213	0.674856	0.87764	0.916656	0.844964	0.887394	0.863692	0.693095	0.861351	0.714457	0.925044	0.869252	0.904756	0.805168	0.760398	0.658469	0.855498	0.90934	0.924069	0.798243
cg00882832	0.0321058	0.0408036	0.057112	0.0334648	0.0365906	0.0386292	0.0414831	0.0350957	0.0336007	0.0475988	0.033193	0.0307468	0.0212335	0.0284364	0.0194668	0.0403959	0.0319699	0.0303391	0.0307468	0.0330571	0.0274851	0.0541222	0.0285723	0.0357752	0.04026	0.0446089	0.0481424	0.0299313	0.0311545	0.02898	0.0477347	0.0240875	0.0273492	0.038901	0.0365906	0.0326494	0.0408036	0.0281646	0.0268056	0.0315622	0.0417549	0.0291159	0.0338725	0.0403959	0.0349598	0.0311545	0.0329212	0.0274851	0.0336007
cg00884221	0.0443065	0.073859	0.0532486	0.0304572	0.542663	0.0557567	0.0446337	0.0532486	0.773412	0.0605549	0.491737	0.0335106	0.0267496	0.0390722	0.0329654	0.0462694	0.0404898	0.0434341	0.0368912	0.0540119	0.0311115	0.078439	0.0504133	0.0399446	0.0465966	0.0614273	0.436558	0.451607	0.0448518	0.0662255	0.0433251	0.0450699	0.0324201	0.0393993	0.0477961	0.043216	0.0482323	0.101012	0.0281672	0.0534667	0.0389631	0.396318	0.0283853	0.0374364	0.0391812	0.0372183	0.448771	0.021188	0.0473599
cg00884529	0.0873257	0.0896608	0.0878564	0.10728	0.0870073	0.105264	0.0848844	0.0775607	0.0706615	0.0824432	0.0539973	0.075544	0.0664159	0.0978337	0.0820186	0.149312	0.0828678	0.10261	0.0751195	0.109403	0.07703	0.0901915	0.0929512	0.106643	0.0701308	0.0906161	0.107493	0.0729966	0.0933757	0.0659913	0.0515561	0.095817	0.0624886	0.0781975	0.0994258	0.0813818	0.109085	0.0968784	0.0766054	0.106537	0.088281	0.0697063	0.0921021	0.084566	0.085309	0.105157	0.103459	0.0779853	0.0879625
cg00885506	0.0305671	0.0353682	0.0393416	0.0304844	0.0411627	0.0332988	0.0467088	0.0560627	0.030236	0.0454671	0.0333816	0.0251038	0.0264282	0.030236	0.030981	0.0424043	0.0236966	0.030981	0.0304844	0.0279182	0.0288288	0.0500199	0.0381827	0.0359477	0.0356994	0.0342094	0.0461293	0.0223721	0.0403349	0.0222066	0.032471	0.0260971	0.0342921	0.0382655	0.0448877	0.0434805	0.0335471	0.030981	0.0258488	0.029491	0.0430666	0.0331332	0.032471	0.0434805	0.0285805	0.0372721	0.0444738	0.0230344	0.046626
cg00886554	0.05654	0.0703177	0.0618215	0.052866	0.57596	0.0592956	0.0542437	0.0626252	0.0553919	0.0591807	0.05034	0.052866	0.054703	0.0549326	0.0486178	0.0549326	0.0553919	0.0555067	0.0510289	0.06274	0.0506845	0.0567696	0.0553919	0.0592956	0.0571141	0.0687103	0.0637733	0.352416	0.0553919	0.0504549	0.0595252	0.0511437	0.0548178	0.0550474	0.0512586	0.054703	0.0727288	0.0569993	0.049766	0.0581474	0.0590659	0.0556215	0.0566548	0.0557363	0.0603289	0.0521771	0.0536697	0.05034	0.0576882
cg00887101	0.0803731	0.0338964	0.0586658	0.0639736	0.0643819	0.0634972	0.0551273	0.0517249	0.0330798	0.050432	0.029133	0.0514528	0.0217838	0.0502959	0.0222602	0.0538344	0.0752695	0.0707103	0.0464172	0.0724115	0.0218519	0.0492072	0.0468935	0.0658789	0.0522693	0.0961603	0.0695535	0.0265472	0.0511125	0.0230768	0.0272957	0.0421982	0.0219199	0.0707103	0.046145	0.0786039	0.0877904	0.0771068	0.0343047	0.0607073	0.053222	0.0594824	0.0692133	0.0579173	0.0608434	0.0579173	0.0559439	0.0221241	0.068805
cg00887547	0.050855	0.0360956	0.0482721	0.0829566	0.0538069	0.0689352	0.0383095	0.0401544	0.0390475	0.0442133	0.0290849	0.0386785	0.0305609	0.0696732	0.0287159	0.0541759	0.0622935	0.0781598	0.0475341	0.0670903	0.0301919	0.0563898	0.0434753	0.0538069	0.0386785	0.0929192	0.0375716	0.0379405	0.049748	0.0305609	0.0449512	0.0360956	0.0353576	0.0401544	0.0453202	0.0600796	0.0615555	0.0689352	0.0301919	0.0630315	0.0552828	0.0408924	0.0578657	0.0467962	0.0678283	0.0563898	0.0405234	0.02724	0.0479031
cg00887700	0.0282338	0.0189077	0.0208711	0.0247979	0.0227118	0.0325287	0.0310562	0.0278657	0.0249206	0.0351057	0.018785	0.0245524	0.0185396	0.0278657	0.0174351	0.0246752	0.0222209	0.0328969	0.0227118	0.0273748	0.0195212	0.0353511	0.030688	0.0290928	0.0322833	0.0352284	0.0354738	0.0160853	0.0241843	0.0193985	0.0190304	0.0249206	0.0189077	0.0331423	0.0379281	0.0267613	0.0284792	0.0286019	0.0223436	0.0289701	0.0340013	0.0249206	0.0241843	0.0313016	0.0238162	0.0262704	0.0256568	0.0119131	0.024307
cg00888007	0.0300333	0.0290836	0.0308775	0.0300333	0.0311941	0.0299278	0.0304554	0.0270786	0.0276062	0.0292946	0.0300333	0.0291891	0.0281338	0.0323548	0.0288725	0.0318272	0.337112	0.028767	0.028978	0.0308775	0.0276062	0.0296112	0.0299278	0.0292946	0.0298222	0.465115	0.028767	0.0279228	0.0291891	0.0268675	0.0284504	0.0442792	0.0423798	0.0284504	0.0282394	0.0387919	0.0292946	0.0296112	0.0284504	0.030772	0.0386864	0.0296112	0.0301388	0.0301388	0.0319327	0.0317217	0.102529	0.026762	0.043435
cg00888479	0.334717	0.0529404	0.108935	0.04507	0.190017	0.526231	0.0743381	0.0481854	0.646254	0.137301	0.502947	0.224942	0.145746	0.0977034	0.0831103	0.127053	0.0738462	0.075076	0.069747	0.14427	0.0987692	0.0766336	0.120003	0.416291	0.136809	0.0608928	0.0724525	0.641909	0.283478	0.318895	0.0483494	0.154436	0.0739282	0.0635983	0.0623685	0.508686	0.065074	0.0834383	0.0892591	0.0565477	0.278559	0.474991	0.0660578	0.438754	0.137219	0.120659	0.648304	0.296349	0.144188
cg00888561	0.0375095	0.0425138	0.0365086	0.0271673	0.0488525	0.0348406	0.0325052	0.0238312	0.065867	0.0408457	0.0348406	0.0321716	0.0378431	0.0231639	0.0234975	0.0368423	0.0385103	0.0405121	0.0311708	0.0371759	0.0194941	0.0301699	0.038844	0.0451827	0.0415129	0.0455163	0.0358414	0.0418465	0.0224967	0.0201614	0.0271673	0.0341733	0.0315044	0.0231639	0.0311708	0.0598619	0.0308371	0.0451827	0.0214958	0.0288354	0.0401784	0.0628645	0.0385103	0.0468508	0.029169	0.0285018	0.0435146	0.017826	0.0505206
cg00890257	0.0433129	0.0266719	0.0374553	0.0300001	0.0370559	0.0305326	0.0333283	0.0281363	0.035059	0.0373221	0.0210806	0.0355915	0.0281363	0.0305326	0.0230775	0.0343933	0.0355915	0.0393191	0.0266719	0.0286688	0.0253407	0.0379878	0.0346596	0.0314645	0.033994	0.0276038	0.0342602	0.0234769	0.0354584	0.0238763	0.027737	0.0349258	0.0285357	0.0327958	0.0337277	0.0375884	0.0563594	0.0311983	0.0398516	0.033994	0.0335946	0.033994	0.0297339	0.0385203	0.0330621	0.0399847	0.0284026	0.018418	0.0572913
cg00891278	0.516561	0.703791	0.533144	0.772173	0.535704	0.71239	0.384609	0.692019	0.660695	0.600707	0.61422	0.490048	0.694169	0.704201	0.712595	0.627323	0.660797	0.7128	0.604699	0.625378	-0.00346723	0.688539	0.635205	0.464046	0.661002	0.730305	0.678711	0.642576	0.734297	0.646056	0.797765	0.48411	0.423816	0.772685	0.478071	0.452581	0.67216	0.609408	0.6912	0.716076	0.674821	0.64319	0.654041	0.632441	0.664994	0.554232	0.687208	0.732557	0.590777
cg00891541	0.767653	0.949783	0.932386	0.886073	0.745217	0.877555	0.916188	0.980858	0.891353	0.861597	0.890033	0.885593	0.918468	0.793329	0.90863	0.862197	0.821404	0.866157	0.800167	0.831962	0.985177	0.47994	0.72218	0.849479	0.828843	0.841681	0.495537	0.925307	0.868556	0.882474	0.949063	0.90899	0.618637	0.369918	0.72218	0.751455	0.895072	0.800527	0.937305	0.84288	0.860518	0.824524	0.78409	0.854999	0.90419	0.620197	0.838441	0.953262	0.451625
cg00892393	0.902439	0.690869	0.935774	0.907636	0.472578	0.603409	0.679219	0.407162	0.586024	0.8148	0.446411	0.324004	0.762826	0.841593	0.301691	0.650365	0.618643	0.877796	0.707536	0.621958	0.945183	0.620435	0.489962	0.298017	0.690869	0.442648	0.451967	0.502866	0.331979	0.907547	0.656637	0.74123	0.797236	0.936132	0.850017	0.847956	0.584053	0.652157	0.350797	0.475714	0.859247	0.664792	0.911669	0.317731	0.815965	0.691227	0.328484	0.867043	0.401517
cg00892798	0.060706	0.0345424	0.465806	0.0307923	0.563832	0.399001	0.103265	0.273852	0.649038	0.0656771	0.714447	0.264956	0.0383797	0.0399495	0.0308795	0.0440485	0.038903	0.264259	0.0330598	0.0931488	0.446183	0.107713	0.0301818	0.0326237	0.0375948	0.450195	0.512377	0.67433	0.659416	0.512813	0.343709	0.247514	0.0330598	0.0357634	0.332633	0.406327	0.0321877	0.072218	0.034368	0.667789	0.425165	0.657236	0.0336703	0.436939	0.0332342	0.0575664	0.671713	0.0283503	0.451939
cg00893242	0.0757766	0.0401756	0.0646513	0.0458037	0.0954094	0.0571908	0.0609864	0.0655675	0.0721117	0.0793105	0.049992	0.0506465	0.0503847	0.0507774	0.0414845	0.0613791	0.0671381	0.0506465	0.07185	0.055751	0.0455419	0.0725044	0.0612482	0.070672	0.0514318	0.0587614	0.0761692	0.0536568	0.0704102	0.0425315	0.0495994	0.0675307	0.0448875	0.0613791	0.0848077	0.0897813	0.0532642	0.0937079	0.0430551	0.0509082	0.0596776	0.0587614	0.0590232	0.0608556	0.0518244	0.0683161	0.245274	0.0338931	0.0823208
cg00893636	0.0319046	0.0321762	0.0395116	0.0266521	0.398673	0.0298217	0.0350742	0.0331724	0.581513	0.0405078	0.566933	0.028735	0.0358892	0.0281916	0.0367042	0.0396927	0.0300028	0.0320857	0.0281916	0.026471	0.0427718	0.0494732	0.0359798	0.030365	0.0323574	0.0289161	0.332292	0.55996	0.0399644	0.0357986	0.0374287	0.0311801	0.0434962	0.0364326	0.049111	0.0327196	0.0291878	0.0315423	0.0420473	0.0324479	0.0241164	0.518393	0.101092	0.0490204	0.0284633	0.0403266	0.642007	0.0239353	0.0376098
cg00893987	0.0300719	0.0561815	0.0323622	0.0396912	0.0538912	0.0392331	0.0305299	0.0282396	0.0314461	0.0548073	0.0245751	0.0213686	0.0268654	0.0328202	0.0259493	0.0323622	0.0323622	0.0364848	0.0264073	0.0277815	-0.000160344	0.0428976	0.0282396	0.0635105	0.0337364	0.095575	0.0360267	0.0264073	0.0282396	0.0250332	0.0346525	-0.00107647	0.0245751	0.0291557	0.0470202	0.0268654	0.0534331	0.0314461	0.0218267	0.0163299	0.0612202	0.0291557	0.0341944	0.045188	0.0199945	0.0392331	0.0360267	0.0131235	0.0273235
cg00895324	0.847358	0.251589	0.894167	0.90336	0.619219	0.20703	0.298867	0.263877	0.503836	0.622408	0.911522	0.362656	0.841073	0.300274	0.352337	0.409466	0.608618	0.902235	0.431698	0.355808	0.477758	0.33639	0.467439	0.350461	0.569126	0.9164	0.58845	0.609463	0.767715	0.44727	0.869871	0.790698	0.574285	0.904392	0.795482	0.608149	0.393425	0.598487	0.665184	0.29746	0.345865	0.803737	0.758804	0.442768	0.694077	0.344645	0.599707	0.747359	0.468564
cg00897329	0.0383523	0.0494996	0.0402102	0.0437195	0.0338109	0.0443388	0.0400038	0.0311273	0.0274115	0.0274115	0.0249343	0.0263793	0.0284437	0.0379395	0.0276179	0.0331916	0.043926	0.037733	0.0311273	0.0699362	0.0191543	0.031953	0.0329851	0.057344	0.0315401	0.0443388	0.037733	0.0230765	0.0325723	0.0265858	0.0280308	0.0284437	0.0296822	0.0338109	0.0315401	0.0402102	0.0571375	0.0323658	0.0410359	0.0447517	0.0798449	0.0397973	0.0554861	0.0350494	0.0286501	0.0321594	0.0408295	0.0166771	0.0329851
cg00899086	0.0456354	0.0467059	0.0520584	0.0438512	0.0503932	0.0487279	0.0488469	0.0587194	0.066094	0.0490848	0.0487279	0.0421859	0.037666	0.0402828	0.0356439	0.0468248	0.0439701	0.0497985	0.0433754	0.0563405	0.0338598	0.0544373	0.0451596	0.0628825	0.0524153	0.0517016	0.204309	0.0370713	0.0469438	0.0314809	0.0401639	0.0413533	0.0358818	0.0446838	0.0473006	0.05075	0.0513447	0.0513447	0.0409965	0.0538426	0.0483711	0.0480143	0.0432565	0.0450406	0.0473006	0.0393313	0.0474195	0.0287451	0.0445649
cg00899641	0.02609	0.0279545	0.0316835	0.0247992	0.0292453	0.0276677	0.029819	0.0312532	0.0255163	0.0364164	0.0203531	0.0207834	0.0183452	0.0299624	0.0227913	0.0299624	0.0272374	0.0253729	0.0156202	0.0235084	0.0164807	0.0387112	0.0239387	0.0259466	0.0265203	0.0299624	0.0293887	0.0229347	0.0199229	0.0166241	0.0222176	0.0222176	0.0190623	0.0247992	0.0249426	0.0209268	0.0258032	0.0216439	0.015907	0.029819	0.0269506	0.0268071	0.0249426	0.0239387	0.0235084	0.0236518	0.0276677	0.013182	0.0282414
cg00901493	0.0410006	0.0368553	0.0480719	0.0422198	0.057094	0.0368553	0.028199	0.035758	0.0516076	0.0402691	0.0307593	0.0330758	0.0362457	0.0344169	0.0313689	0.0406348	0.0463651	0.0544118	0.0291743	0.0339292	0.038806	0.0425855	0.0491692	0.0431951	0.0375868	0.0462431	0.0423417	0.0331977	0.0423417	0.034295	0.0366115	0.0466089	0.0335635	0.0366115	0.0435609	0.0588009	0.0474623	0.0481939	0.0419759	0.0455116	0.0438047	0.0385622	0.0355142	0.0505104	0.0458774	0.0566064	0.060264	0.0288086	0.0391718
cg00901652	0.0425621	0.0550403	0.0342203	0.0430446	0.0415969	0.0413211	0.039115	0.0706208	0.0580736	0.0537304	0.0315316	0.0332551	0.0279467	0.0432515	0.0276709	0.0608312	0.0361506	0.0440098	0.033324	0.0402181	0.0269126	0.0960597	0.0379431	0.0527652	0.0431825	0.055385	0.0481462	0.0332551	0.0487667	0.0278778	0.0282225	0.0316005	0.0259474	0.039115	0.076136	0.0475947	0.0404249	0.0480083	0.028705	0.0434583	0.053041	0.0470432	0.0405628	0.0374605	0.0355301	0.0412522	0.0454575	0.0286361	0.0413211
cg00901683	0.0189025	0.0234872	0.0193012	0.0218925	0.0308625	0.0239855	0.0245835	0.0210952	0.0236865	0.0256798	0.0151152	0.0204972	0.0159125	0.0214938	0.0140189	0.0185038	0.0195005	0.0196002	0.0185038	0.0209955	0.0160122	0.0207962	0.0187032	0.0234872	0.0175072	0.0204972	0.0448157	0.0158129	0.0219922	0.0143179	0.0143179	0.0182048	0.0144175	0.0195005	0.0189025	0.0196998	0.0194008	0.0179058	0.0155139	0.0174075	0.0240852	0.0183045	0.0232878	0.0198992	0.0199988	0.0218925	0.0198992	0.0142182	0.0200985
cg00901704	0.0486236	0.0606115	0.0513379	0.0436476	0.0450047	0.0468142	0.0357311	0.056314	0.0483975	0.0459094	0.0531474	0.049076	0.0549568	0.0511117	0.0402548	0.0560878	0.0416119	0.0400286	0.0445523	0.0508855	0.0398024	0.0413857	0.0375405	0.0388977	0.0416119	0.0472665	0.077123	0.0567663	0.0379929	0.0407071	0.0364096	0.0402548	0.0529212	0.0407071	0.0522426	0.0474927	0.0504331	0.036862	0.0461356	0.0554092	0.0479451	0.0416119	0.0540521	0.0456832	0.0504331	0.0438737	0.0463618	0.033243	0.0445523
cg00901766	0.0483724	0.0220488	0.0304418	0.040488	0.0340025	0.0641411	0.0326036	0.0356557	0.036673	0.0357828	0.0187424	0.0310776	0.0242106	0.0245921	0.0252279	0.0276441	0.0415054	0.0586729	0.0224303	0.0636325	0.0220488	0.0542221	0.0454475	0.0535862	0.040488	0.0193783	0.030569	0.0202684	0.0383262	0.0242106	0.0192511	0.0224303	0.0216673	0.039725	0.0526961	0.0477365	0.0524417	0.0554937	0.0220488	0.0462105	0.0416325	0.0472279	0.039725	0.0354013	0.0253551	0.0379447	0.0342568	0.00933204	0.041251
cg00903242	0.590186	0.796425	0.764303	0.84653	0.511985	0.751061	0.753208	0.533369	0.754908	0.691202	0.732003	0.770477	0.630807	0.726992	0.83973	0.128586	0.526122	0.644586	0.703282	0.655234	0.129928	0.830514	0.561464	0.861025	0.702476	0.836241	0.204461	0.732898	0.817183	0.721355	0.730124	0.193545	0.157039	0.148092	0.581059	0.402021	0.601459	0.673665	0.829262	0.555469	0.820314	0.742292	0.801704	0.61846	0.761619	0.235508	0.735224	0.489885	0.47879
cg00904483	0.942519	0.947072	0.942123	0.948853	0.935591	0.945884	0.944597	0.926584	0.957464	0.906393	0.95885	0.935393	0.957266	0.954297	0.962017	0.947072	0.942024	0.935888	0.958652	0.920744	0.961126	0.910649	0.940539	0.346389	0.952219	0.94727	0.939352	0.960533	0.940144	0.960236	0.952417	0.957662	0.961423	0.940935	0.939451	0.937075	0.941034	0.926386	0.945488	0.940539	0.913222	0.932819	0.933809	0.948161	0.954792	0.939748	0.937867	0.972608	0.958157
cg00904574	0.0374468	0.0358024	0.0352543	0.026484	0.0271692	0.0322395	0.0318284	0.0340209	0.0345691	0.0359394	0.0253877	0.034295	0.0290877	0.0267581	0.0268951	0.0315543	0.0321024	0.0347061	0.034158	0.0284025	0.0251136	0.038132	0.0319654	0.0338839	0.0319654	0.0301839	0.0281284	0.0241544	0.0334728	0.0253877	0.0305951	0.0281284	0.0277173	0.030321	0.0404616	0.0348431	0.0363505	0.0389542	0.0294988	0.0358024	0.0294988	0.0326506	0.0268951	0.0285395	0.0279914	0.0314173	0.0322395	0.0230581	0.0318284
cg00905170	0.0333635	0.0248935	0.0263291	0.0266162	0.0287696	0.0294874	0.0283389	0.0224529	0.0248935	0.0247499	0.0221658	0.025037	0.0220223	0.0296309	0.0210173	0.0276211	0.028626	0.0332199	0.0246063	0.0290567	0.0234579	0.0365218	0.0256113	0.0319279	0.0241757	0.0290567	0.0251806	0.0220223	0.0294874	0.0195817	0.0220223	0.0238885	0.0230272	0.0258984	0.0251806	0.0294874	0.0325021	0.0279082	0.0227401	0.0289131	0.0304923	0.0276211	0.0302052	0.0266162	0.0290567	0.0290567	0.0289131	0.0205867	0.0279082
cg00906183	0.0393561	0.032411	0.0349697	0.057267	0.0422803	0.0460574	0.0539773	0.0387468	0.0367973	0.0360663	0.0303396	0.0307052	0.0277809	0.0355789	0.0336294	0.0367973	0.034726	0.0378939	0.0305833	0.037041	0.030827	0.0367973	0.0348478	0.0398434	0.0621408	0.0333857	0.0488598	0.0266843	0.0376502	0.0298523	0.0294867	0.037041	0.0369192	0.0335076	0.0352134	0.03631	0.0361881	0.0349697	0.0434987	0.0357007	0.0382595	0.0395997	0.0342386	0.0589729	0.0359444	0.0439861	0.0537336	0.0311925	0.0336294
cg00908551	0.0501771	0.0411555	0.0522647	0.0463746	0.0686677	0.047493	0.0572602	0.048164	0.0520411	0.050028	0.0483877	0.0485368	0.0429449	0.0498789	0.0431685	0.054427	0.0515937	0.0435413	0.0527121	0.0530849	0.0484622	0.0535322	0.0489841	0.0485368	0.05137	0.0511464	0.0505499	0.0537559	0.0487605	0.0476421	0.0433922	0.053905	0.0486114	0.0577821	0.0523393	0.0527867	0.0491333	0.0521156	0.0615101	0.0516683	0.0486114	0.0558436	0.0531595	0.0919301	0.0483131	0.0603171	0.576191	0.0466728	0.0434668
cg00910067	0.110786	0.0707877	0.113465	0.0707877	0.488693	0.21905	0.123811	0.0774387	0.709008	0.161131	0.386249	0.122425	0.131109	0.0768845	0.113835	0.119192	0.111525	0.0675546	0.0849211	0.131571	0.062012	0.0771616	0.0766073	0.0879695	0.10432	0.653029	0.376365	0.679079	0.0737437	0.0798405	0.0887085	0.136467	0.181638	0.0737437	0.0872305	0.153464	0.0850135	0.236047	0.0833507	0.0712496	0.0866762	0.666516	0.10081	0.141178	0.156512	0.104228	0.475207	0.0676469	0.10395
cg00910168	0.673832	0.768744	0.571249	0.389413	0.720595	0.672766	0.525763	0.825841	0.775455	0.735083	0.71463	0.75202	0.763418	0.546429	0.546323	0.574338	0.703871	0.662434	0.482195	0.52587	0.853324	0.693645	0.809436	0.502115	0.686508	0.802725	0.668718	0.882618	0.792286	0.498174	0.819023	0.742326	0.800169	0.243688	0.713139	0.704723	0.46366	0.7272	0.836387	0.390478	0.759796	0.870794	0.31996	0.716548	0.736254	0.706108	0.824137	0.377695	0.845974
cg00911873	0.940247	0.937539	0.892947	0.943439	0.925448	0.888691	0.940054	0.954273	0.9239	0.889368	0.932509	0.911519	0.941505	0.953209	0.9653	0.970136	0.871377	0.899912	0.895269	0.875536	0.952629	0.916549	0.885596	0.946148	0.937442	0.916742	0.90262	0.95553	0.931832	0.913067	0.842261	0.950017	0.917032	0.824657	0.946825	0.89817	0.944116	0.901362	0.981841	0.942859	0.870796	0.916355	0.877857	0.911809	0.962882	0.802119	0.920418	0.968492	0.529538
cg00912191	0.0538807	0.1161	0.127293	0.0820823	0.12433	0.0602453	0.0671585	0.322949	0.0675975	0.19017	0.058709	0.0496011	0.0454312	0.113466	0.112918	0.105346	0.058709	0.0789001	0.0775833	0.0865814	0.0852646	0.184684	0.0893248	0.0887761	0.105236	0.100847	0.0944823	0.0448825	0.0616718	0.0536612	0.0679267	0.0669391	0.0544294	0.0774735	0.139693	0.0605745	0.112588	0.0963478	0.0891053	0.0436754	0.0813142	0.0769248	0.080985	0.125537	0.0694629	0.114783	0.109626	0.0677072	0.106224
cg00912942	0.902894	0.940166	0.942103	0.931845	0.923866	0.927742	0.947803	0.923297	0.937088	0.904262	0.955553	0.922955	0.944611	0.932073	0.922157	0.92968	0.924208	0.934353	0.909961	0.928198	0.95202	0.894231	0.91395	0.939824	0.94142	0.945409	0.936176	0.94028	0.951678	0.936974	0.957833	0.9274	0.746512	0.93857	0.895827	0.922727	0.938456	0.867902	0.937202	0.907111	0.937316	0.925804	0.932643	0.936176	0.919421	0.914748	0.918623	0.495639	0.948828
cg00915289	0.0386097	0.0289716	0.0434287	0.0341613	0.0538081	0.0341613	0.0400924	0.029713	0.0386097	0.0389804	0.0319372	0.034532	0.029713	0.0278596	0.0263768	0.034532	0.0419459	0.0367562	0.0286009	0.038239	0.0326786	0.043058	0.0363855	0.0349027	0.0475063	0.03342	0.0356441	0.0315665	0.0360148	0.0237819	0.0337906	0.0308251	0.0341613	0.0360148	0.0386097	0.0367562	0.0286009	0.0341613	0.0337906	0.0367562	0.0360148	0.0374976	0.0323079	0.0412045	0.0423166	0.0400924	0.0363855	0.0215578	0.0463942
cg00916199	0.0394779	0.0247629	0.0401247	0.0267033	0.0438439	0.0323629	0.0292906	0.0310693	0.0352736	0.0422269	0.0202352	0.0291289	0.0228224	0.0276735	0.0267033	0.029614	0.0368906	0.0313927	0.0281586	0.0365672	0.0228224	0.0490184	0.0331714	0.039963	0.0341417	0.0216905	0.031231	0.020882	0.0323629	0.020882	0.0275118	0.0270267	0.0249246	0.0354353	0.0414183	0.0362438	0.0375374	0.0367289	0.0257331	0.0404481	0.0334949	0.031231	0.0373757	0.0354353	0.0267033	0.0326863	0.0385077	0.0155457	0.0378609
cg00916635	0.628914	0.18595	0.858449	0.886679	0.654492	0.835808	0.85447	0.86167	0.838555	0.698826	0.888668	0.564118	0.760307	0.772054	0.92334	0.726204	0.783611	0.887626	0.792989	0.813167	0.825956	0.788063	0.821598	0.241178	0.862807	0.797915	0.771485	0.816199	0.174108	0.604189	0.148815	0.77499	0.323026	0.876922	0.341593	0.746855	0.201391	0.663776	0.905152	0.784653	0.85087	0.817146	0.192865	0.736151	0.695605	0.779822	0.864133	0.839882	0.742308
cg00917893	0.0329802	0.0386696	0.032777	0.0325738	0.0376536	0.0364345	0.0283067	0.0301355	0.0303386	0.0396856	0.0297291	0.0287131	0.0297291	0.0366376	0.0293227	0.0309482	0.0281035	0.0348089	0.0319642	0.0374504	0.026478	0.0325738	0.0285099	0.0392792	0.0321674	0.03806	0.0341993	0.0260716	0.0262748	0.0283067	0.0325738	0.030745	0.0293227	0.0287131	0.0364345	0.0297291	0.0311514	0.0335897	0.0274939	0.0315578	0.0449686	0.044359	0.0321674	0.0339961	0.0459846	0.0274939	0.0311514	0.024446	0.0323706
cg00918794	0.0511743	0.0580796	0.0591154	0.069646	0.0523827	0.0520374	0.0554901	0.0587701	0.0480669	0.0522101	0.0313214	0.0430605	0.0306309	0.0465131	0.0454773	0.0446142	0.0589428	0.0499658	0.0371909	0.0689555	0.033393	0.0461679	0.0421973	0.0504837	0.0532459	0.0639491	0.0642944	0.0358099	0.0480669	0.0325298	0.0432331	0.0378815	0.0453047	0.0596333	0.0478942	0.0432331	0.0667113	0.0485848	0.0337383	0.0501385	0.0601512	0.0472037	0.0442689	0.0482395	0.0494479	0.0423699	0.0435784	0.0270056	0.0420247
cg00920960	0.310744	0.106607	0.448753	0.29482	0.0995299	0.212989	0.0289776	0.0811731	0.0780767	0.0537483	0.123637	0.0475557	0.180256	0.0409207	0.399432	0.0869234	0.320697	0.28708	0.0648067	0.0663549	0.101078	0.05596	0.131599	0.232009	0.122531	0.166765	0.132705	0.114127	0.0842694	0.0955489	0.058614	0.058614	0.0900197	0.0342857	0.15637	0.245279	0.0205733	0.0727687	0.0283141	0.0468922	0.0656914	0.220287	0.122974	0.122752	0.111473	0.0727687	0.171188	0.037382	0.149292
cg00922727	0.0387512	0.049005	0.0466979	0.0437072	0.067889	0.0414001	0.0507139	0.0523375	0.0474669	0.0532774	0.0538755	0.0320863	0.033368	0.0326844	0.0362732	0.0531065	0.0394348	0.04234	0.0353333	0.0418274	0.0302064	0.0575498	0.0464415	0.0444762	0.044049	0.0487486	0.0390076	0.0384949	0.0424255	0.0376404	0.0372986	0.0362732	0.034137	0.0428527	0.051483	0.0431091	0.0517393	0.0486632	0.0523375	0.0391785	0.0449035	0.0478942	0.0459289	0.0495177	0.0380677	0.0425109	0.0894219	0.0282411	0.041571
cg00925717	0.257646	0.395922	0.434537	0.310902	0.466815	0.586769	0.316125	0.162266	0.580775	0.160126	0.58694	0.310902	0.450205	0.364329	0.396179	0.170914	0.328112	0.189151	0.367154	0.354996	0.332478	0.364072	0.288041	0.119285	0.252167	0.533599	0.253366	0.600125	0.306107	0.38659	0.359277	0.29549	0.364072	0.237611	0.270233	0.365442	0.155074	0.360733	0.14694	0.320748	0.482741	0.532229	0.424862	0.247372	0.324002	0.275798	0.529403	0.4163	0.436335
cg00929855	0.555316	-0.00500272	0.664486	0.542127	0.564761	0.701756	0.00274048	0.109614	0.633854	0.605689	0.570632	-0.00287546	0.00682481	0.694098	0.493455	0.0297141	0.634705	0.676995	-0.00236492	-0.0154688	-0.00925722	0.0434136	0.632492	-0.00798087	0.518642	0.69112	0.64883	0.629004	0.0871499	-0.0110441	0.748896	0.51175	0.190619	0.0779601	0.0295439	0.447166	0.624834	0.605349	0.35144	0.0127811	0.123994	0.62577	0.642023	0.61139	0.539149	0.644575	0.678186	-0.0135117	0.615985
cg00930078	0.0320109	0.0131419	0.0336517	0.0219611	0.0424709	0.0370358	0.0304726	0.0212432	0.0171413	0.0294472	0.012424	0.0157056	0.0101679	0.0150903	0.0115011	0.0225764	0.0221662	0.0294472	0.0202177	0.0388817	0.00688637	0.0268834	0.0239095	0.0346772	0.0241146	0.0408301	0.023807	0.0084246	0.0254477	0.0100654	0.0119113	0.0141673	0.0106807	0.0218585	0.0215509	0.0236019	0.0391893	0.029037	0.0168336	0.0201152	0.0289344	0.0325236	0.0231917	0.0350874	0.0280115	0.0222687	0.0244223	0.00432264	0.0564176
cg00930194	0.437256	0.427813	0.599484	0.377415	0.152693	0.194284	0.388449	0.192375	0.77784	0.447972	0.7267	0.214974	0.325107	0.182932	0.777946	0.414656	0.161924	0.148024	0.695718	0.146963	0.985162	0.213489	0.250412	0.127122	0.189616	0.914604	0.143568	0.786328	0.738158	0.339006	0.223887	0.413277	0.200226	0.940387	0.418582	0.390359	0.371367	0.211791	0.131154	0.153966	0.604577	0.441818	0.354709	0.159589	0.237998	0.292003	0.86739	0.122772	0.436725
cg00930873	0.0386033	0.59807	0.576739	0.0209739	0.439494	0.628569	0.493176	0.135124	0.584936	0.492382	0.611292	0.598247	0.472726	0.582557	0.0391322	0.0646066	0.540422	0.0249405	0.40309	0.319086	0.0186821	0.338302	0.0319041	0.0464483	0.61235	0.64849	0.565897	0.555055	0.0662813	0.155574	0.786087	0.143939	0.352053	0.0260865	0.0461839	0.431032	0.0651354	0.285943	0.0268798	0.0343722	0.336275	0.523058	0.0254694	0.517945	0.592958	0.045038	0.620283	0.015597	0.2699
cg00932276	0.584221	0.737355	0.677547	0.543566	0.570218	0.573831	0.0772966	0.73853	0.675469	0.664989	0.669145	0.590455	0.566784	0.0473021	0.758496	0.609608	0.519353	0.528207	0.509054	0.644752	0.297918	0.229889	0.69652	0.553142	0.645655	0.757322	0.494057	0.698417	0.766356	0.218596	0.752624	0.568501	0.514475	0.0382677	0.530918	0.544469	0.700585	0.560641	0.71766	0.138099	0.611957	0.665531	0.629122	0.358992	0.571211	0.0851566	0.671223	0.786864	0.51854
cg00933411	0.193969	0.248543	0.130194	0.287887	0.319457	0.176201	0.117185	0.154942	0.151611	0.292805	0.289791	0.103224	0.189368	0.169855	0.144472	0.341826	0.0910083	0.324534	0.138126	0.160336	0.08847	0.253778	0.148279	0.0973541	0.152245	0.188892	0.131621	0.39878	0.107983	0.229505	0.145106	0.26758	0.222208	0.134318	0.325803	0.375935	0.11893	0.106714	0.123848	0.177628	0.142727	0.15875	0.273133	0.182071	0.137967	0.274243	0.136857	0.0802204	0.228554
cg00935388	0.924059	0.879125	0.919405	0.89323	0.924931	0.907772	0.850623	0.802489	0.902537	0.79042	0.940782	0.704623	0.934238	0.895266	0.785766	0.899483	0.88276	0.877525	0.90181	0.844079	0.856294	0.83739	0.931475	0.850768	0.929294	0.938455	0.942963	0.924059	0.875344	0.95067	0.908644	0.934965	0.941218	0.859057	0.929585	0.902828	0.820667	0.932493	0.930748	0.89483	0.809033	0.943108	0.832591	0.904573	0.860656	0.909371	0.922314	0.70375	0.89483
cg00935430	0.0447102	0.0453128	0.0465181	0.0338631	0.0530263	0.0447102	0.0389251	0.0433845	0.0495311	0.0665249	0.0342247	0.0294038	0.0259086	0.0396482	0.027837	0.0484464	0.0390456	0.0361531	0.0316937	0.0309706	0.0232571	0.111239	0.0408535	0.0391662	0.0472412	0.0320553	0.0668865	0.0336221	0.0373583	0.0263907	0.0297654	0.0326579	0.0261497	0.0377199	0.0620655	0.0420587	0.0425408	0.0420587	0.0310911	0.0347068	0.0507364	0.0386841	0.0385635	0.0448307	0.0316937	0.0422998	0.0527853	0.0237392	0.0521826
cg00936626	0.673188	0.620965	0.736793	0.554299	0.711925	0.636077	0.498538	0.79485	0.69423	0.517571	0.777634	0.650711	0.586054	0.493373	0.302845	0.702838	0.502268	0.601166	0.546935	0.693178	0.471278	0.506381	0.45081	0.798676	0.76826	0.420682	0.515563	0.786529	0.467261	0.741958	0.773616	0.671658	0.568264	0.701786	0.561377	0.676057	0.741479	0.624982	0.640477	0.718429	0.842482	0.841812	0.652815	0.532301	0.446889	0.772756	0.805658	0.572568	0.708386
cg00940278	0.0281126	0.0344379	0.0226123	0.0245374	0.0377381	0.0281126	0.0289376	0.0121617	0.016837	0.0594643	0.017387	0.0187621	0.0239874	0.0305877	0.0209622	0.0204122	0.0250874	0.0297627	0.0187621	0.0388382	0.0195871	0.0198621	0.0250874	0.0391132	0.0223373	0.0201372	0.0259125	0.0132618	0.0261875	0.016562	0.017112	0.017112	0.0248124	0.0226123	0.0217872	0.0250874	0.0206872	0.0451635	0.0157369	0.0223373	0.0344379	0.0286626	0.0446135	0.0495638	0.0300377	0.035538	0.017112	0.0138118	0.0261875
cg00940891	0.0199621	0.024831	0.0181588	0.027536	0.0183391	0.022667	0.0170768	0.0183391	0.0176178	0.0161751	0.0143718	0.0165358	0.0179784	0.0154538	0.0140111	0.0145521	0.0192407	0.0154538	0.0147325	0.0246507	0.0132898	0.0165358	0.0165358	0.0208637	0.0165358	0.0170768	0.0131095	0.0149128	0.0177981	0.0138308	0.0244703	0.0154538	0.0181588	0.0174374	0.0152735	0.0194211	0.0194211	0.0172571	0.0165358	0.0208637	0.024831	0.0217654	0.0163554	0.0131095	0.0163554	0.0190604	0.0145521	0.0152735	0.0159948
cg00941229	0.0208629	0.0212583	0.0215548	0.0223456	0.0202699	0.0264969	0.0208629	0.0149324	0.0166127	0.0189849	0.0118683	0.0151301	0.0130544	0.0251132	0.0113741	0.0134498	0.0206653	0.0177	0.0128567	0.0154266	0.0105834	0.0188861	0.0193803	0.0197757	0.0168104	0.0245201	0.0249155	0.0117695	0.0149324	0.0122637	0.0122637	0.0155255	0.0119671	0.0125602	0.0146359	0.0193803	0.0186884	0.0178977	0.0113741	0.0163162	0.0213572	0.0154266	0.0167116	0.0197757	0.0160197	0.0177988	0.0168104	0.0118683	0.0150312
cg00943245	0.677494	0.512862	0.816797	0.9018	0.544294	0.641871	0.813608	0.827183	0.577913	0.813244	0.584108	0.699724	0.880663	0.82855	0.857613	0.821079	0.451365	0.865357	0.789829	0.729789	0.674669	0.651437	0.609527	0.44025	0.854971	0.7471	0.505118	0.397794	0.845678	0.740813	0.243458	0.845222	0.721225	0.890503	0.818255	0.549761	0.811239	0.59659	0.860984	0.822446	0.826363	0.816888	0.839574	0.772792	0.772245	0.704006	0.492363	0.87957	0.808142
cg00943950	0.0442938	0.0440882	0.0541638	0.0543694	0.0508738	0.110505	0.0498457	0.0521075	0.0500513	0.0702026	0.0373025	0.0379194	0.0407982	0.0245538	0.0389475	0.0584819	0.0482007	0.0523132	0.038125	0.0498457	0.0313394	0.0628001	0.0490232	0.0543694	0.0434713	0.0426488	0.0333957	0.0247594	0.0516963	0.0362744	0.0321619	0.0299	0.0362744	0.0504625	0.0558088	0.04635	0.0516963	0.0420319	0.0449107	0.0574538	0.0368913	0.0457332	0.0477894	0.0516963	0.0467613	0.0482007	0.0556032	0.0187963	0.0428544
cg00945507	0.1937	0.117281	0.133401	0.0981759	0.17967	0.131311	0.0886234	0.156685	0.177879	0.206238	0.0768321	0.0902653	0.0717574	0.0874294	0.0550406	0.108176	0.119967	0.105191	0.0898175	0.0899668	0.0507121	0.180118	0.104594	0.100863	0.0839965	0.126833	0.135042	0.0775784	0.079071	0.0616079	0.0683245	0.107728	0.141013	0.0786232	0.182954	0.167879	0.088922	0.152804	0.0742948	0.0778769	0.0887727	0.128027	0.121908	0.13355	0.0768321	0.124744	0.233403	0.031458	0.162953
cg00945862	0.90162	0.832122	0.890789	0.923056	0.911209	0.889548	0.736224	0.918092	0.903876	0.90162	0.951148	0.880296	0.725393	0.902184	0.598357	0.902522	0.856153	0.910307	0.875671	0.690983	0.813732	0.557741	0.875107	0.830317	0.906358	0.791168	0.787783	0.790829	0.935128	0.889209	0.685003	0.901168	0.808091	0.923845	0.916399	0.813619	0.668193	0.734644	0.945056	0.831106	0.896656	0.916174	0.893722	0.866194	0.818245	0.710162	0.890112	0.940092	0.505505
cg00947019	0.0439487	0.0304617	0.0550754	0.0550754	0.046646	0.0442858	0.0486691	0.0412513	0.0415884	0.0426	0.0294502	0.0436115	0.0338334	0.0520408	0.0311361	0.0365308	0.0426	0.0439487	0.0500178	0.0496806	0.0351821	0.038891	0.0422628	0.0469832	0.0419256	0.0395654	0.0574356	0.0338334	0.0432743	0.0284387	0.0297874	0.0432743	0.0358565	0.0361937	0.0500178	0.0375424	0.0456345	0.0405769	0.0355193	0.0409141	0.0567612	0.0392282	0.0469832	0.0452973	0.0375424	0.0422628	0.0506921	0.0260785	0.0392282
cg00947275	0.383213	0.0333631	0.419918	0.466376	0.337909	0.407229	0.0290634	0.0296926	0.126069	0.0428015	0.0379774	0.0289585	0.527935	0.0315803	0.600191	0.0368238	0.356681	0.399678	0.0321046	0.0368238	0.0308462	0.0503522	0.0411236	0.341684	0.268484	0.0738433	0.305189	0.0443746	0.0420674	0.0310559	0.238596	0.035041	0.026127	0.0272806	0.275301	0.363288	0.0296926	0.0472061	0.500878	0.032629	0.445402	0.465537	0.43009	0.043221	0.0437453	0.0385018	0.539156	0.0238198	0.0926153
cg00948524	0.0389275	0.0393027	0.0384585	0.0321737	0.0459628	0.0365824	0.0394903	0.0399594	0.0419292	0.0405222	0.0341435	0.0338621	0.0399594	0.0313294	0.035363	0.0508405	0.0365824	0.0333931	0.0370514	0.0326427	0.0350816	0.0465256	0.0602209	0.0368638	0.0425858	0.0321737	0.699678	0.0381771	0.0419292	0.0363948	0.041554	0.0327365	0.0396779	0.0395841	0.0488707	0.040147	0.0385523	0.0386461	0.0430549	0.0365824	0.0345188	0.190701	0.0331117	0.0461504	0.0372391	0.0431487	0.0835779	0.0322675	0.0403346
cg00950418	0.0445794	0.0372238	0.0439862	0.0410202	0.0449353	0.0418507	0.0457658	0.0464776	0.0494436	0.0526469	0.036156	0.0387661	0.040783	0.0400711	0.0385288	0.0745951	0.040783	0.040427	0.039122	0.0373424	0.0444608	0.0569179	0.0403084	0.0443421	0.0511046	0.0525282	0.0406643	0.0423253	0.0424439	0.0400711	0.0419693	0.0862217	0.0381729	0.0441048	0.142575	0.0431557	0.0414948	0.0409016	0.0524096	0.0451726	0.036156	0.0439862	0.0353256	0.0532401	0.0455285	0.0439862	0.0461217	0.03058	0.0620194
cg00950621	0.0299511	0.0251585	0.0356422	0.0309994	0.0353426	0.031898	0.0304004	0.0324971	0.0366905	0.0360915	0.0205158	0.026806	0.02426	0.0333957	0.024859	0.0365408	0.0339947	0.0269557	0.0299511	0.0236609	0.0226125	0.0354924	0.0330962	0.0263567	0.0387873	0.027405	0.0304004	0.0217139	0.0387873	0.0208153	0.0278543	0.0275548	0.0253083	0.0378887	0.0350431	0.0281539	0.0330962	0.0321976	0.0278543	0.036391	0.0224628	0.0323473	0.0256078	0.0359417	0.0304004	0.0277046	0.0339947	0.0161726	0.0387873
cg00951770	0.799173	0.630915	0.799929	0.659257	0.840742	0.899032	0.781507	0.75581	0.902528	0.820902	0.818446	0.689583	0.805503	0.899127	0.55817	0.800023	0.858692	0.855574	0.709139	0.829783	0.411262	0.879571	0.817596	0.720287	0.870501	0.832145	0.76025	0.773098	0.79889	0.817879	0.589819	0.807865	0.790009	0.837152	0.866344	0.77546	0.878815	0.794355	0.797851	0.78094	0.750991	0.772531	0.76299	0.756187	0.708006	0.884294	0.719154	0.887695	0.850473
cg00953256	0.463999	0.30585	0.525144	0.514772	0.489583	0.315827	0.476445	0.409669	0.583326	0.574535	0.366897	0.571176	0.460344	0.375491	0.266535	0.465974	0.308221	0.290144	0.447107	0.485434	0.172495	0.324816	0.616023	0.394358	0.678749	0.415102	0.419843	0.378652	0.404631	0.698604	0.524255	0.598242	0.628074	0.208254	0.458368	0.532454	0.349807	0.410459	0.504598	0.434068	0.289551	0.384974	0.536109	0.468543	0.365711	0.448194	0.468543	0.28392	0.741377
cg00953277	0.0153566	0.0120204	0.0575264	0.0308367	0.0477847	0.0288349	0.0240308	0.0165576	0.0205611	0.0424467	0.0359077	0.00895105	0.00561483	0.00868416	0.00147792	0.0441815	0.0500533	0.0388436	0.0161573	0.0348401	-0.000256916	0.0148228	0.0395108	0.0329718	0.0388436	0.0399112	0.119714	0.00801691	0.0786113	-0.00412693	0.00614863	0.0564588	0.0041469	0.0541902	0.0120204	0.0315039	0.0348401	0.0327049	0.0129545	0.0250984	0.0393774	0.0467171	0.0401781	0.0476512	0.0317708	0.0186928	0.0245646	-0.00599522	0.0303029
cg00954003	0.017942	0.0145106	0.015555	0.0163009	0.0200307	0.0185388	0.0165993	0.0119744	0.0137647	0.0137647	0.0133171	0.0152566	0.0139139	0.015555	0.0145106	0.0139139	0.018688	0.0174944	0.014809	0.0165993	0.0122728	0.0165993	0.0170469	0.0158533	0.0137647	0.0165993	0.0139139	0.0161517	0.0161517	0.0118252	0.0137647	0.0139139	0.0136155	0.015555	0.0151074	0.0192847	0.0191355	0.0191355	0.01093	0.0165993	0.0167485	0.017942	0.0170469	0.0191355	0.0167485	0.014809	0.0173453	0.00943814	0.0204783
cg00954566	0.0294912	0.0289011	0.0243773	0.0219188	0.0237873	0.0223121	0.0212304	0.0224105	0.0217221	0.0210337	0.0206403	0.0209353	0.0225088	0.0218204	0.0202469	0.0235906	0.0264425	0.0201486	0.0199519	0.0219188	0.020837	0.021427	0.0200502	0.024869	0.0215254	0.0249674	0.0270326	0.0213287	0.0225088	0.0238856	0.021132	0.0215254	0.021427	0.0238856	0.0218204	0.0226072	0.0246724	0.0221154	0.0215254	0.0286061	0.0223121	0.0212304	0.0224105	0.0199519	0.0204436	0.0218204	0.0288028	0.0189685	0.0207386
cg00955230	0.0522046	0.0605344	0.0531302	0.0440599	0.0490578	0.0409131	0.0399876	0.0331386	0.0349897	0.0555366	0.0385067	0.0427642	0.0368408	0.0448004	0.0357301	0.0398025	0.0453557	0.0594238	0.0353599	0.0462812	0.0327684	0.0455408	0.0453557	0.0370259	0.0299918	0.0512791	0.0351748	0.0383216	0.0373961	0.0329535	0.0383216	0.0331386	0.0366557	0.0362854	0.0394323	0.0405429	0.0509089	0.0485025	0.0325833	0.0436897	0.0436897	0.044245	0.0566472	0.0435046	0.0468365	0.0309174	0.0403578	0.0249939	0.0470216
cg00955451	0.692471	0.945556	0.362922	0.289062	0.886798	0.232821	0.604464	0.9157	0.834202	0.522879	0.924726	0.524268	0.37811	0.819013	0.882111	0.680407	0.412133	0.521143	0.814153	0.436608	0.766765	0.569573	0.817278	0.895738	0.484604	0.92542	0.684139	0.905024	0.717814	0.478529	0.651071	0.530777	0.703407	0.8697	0.798617	0.806689	0.383057	0.621649	0.339748	0.806255	0.563238	0.907541	0.5096	0.617569	0.851126	0.520362	0.945209	0.375333	0.616962
cg00958517	0.0329071	0.0312458	0.0264995	0.028398	0.0378907	0.0427557	0.0318391	0.0307712	0.033263	0.029466	0.0224651	0.0266182	0.0216345	0.0278047	0.0177188	0.0268555	0.0316018	0.029466	0.0293473	0.0365855	0.0187867	0.0307712	0.0285167	0.0325511	0.0297033	0.0317205	0.0356362	0.0263808	0.0285167	0.0173628	0.0187867	0.0263808	0.0211599	0.0318391	0.0396706	0.0278047	0.033263	0.0382467	0.0261435	0.0345683	0.0295846	0.0365855	0.0285167	0.0308899	0.0326697	0.0313645	0.0363481	0.0170068	0.02911
cg00958560	0.582737	0.56996	0.369652	0.769985	0.673026	0.792628	0.542995	0.368525	0.751852	0.583019	0.802775	0.789339	0.566014	0.756174	0.794319	0.717184	0.681763	0.267244	0.56592	0.532378	0.842423	0.578134	0.731558	0.820908	0.622385	0.799392	0.758335	0.787742	0.795259	0.729679	0.803996	0.74086	0.465202	0.188323	0.679227	0.592884	0.774589	0.701024	0.473846	0.621352	0.613084	0.779474	0.761435	0.625956	0.765569	0.528057	0.765851	0.53266	0.531063
cg00960702	0.0376055	0.0300208	0.0338131	0.036552	0.0338131	0.0363413	0.0304421	0.0283353	0.0274925	0.0373948	0.022436	0.0262284	0.0243322	0.0281246	0.0249643	0.0304421	0.0483505	0.0352879	0.0298101	0.0401337	0.0226467	0.0295994	0.0253856	0.0293887	0.0262284	0.0405551	0.0371841	0.0264391	0.0308635	0.0239108	0.0220147	0.0272818	0.0253856	0.025807	0.032549	0.0319169	0.0342345	0.0367627	0.0239108	0.0401337	0.0363413	0.0279139	0.0388696	0.0287566	0.039291	0.0279139	0.0312849	0.0213826	0.0308635
cg00962459	0.617498	0.249345	0.478716	0.797951	0.496381	0.609073	0.603276	0.301162	0.605178	0.680276	0.715243	0.417387	0.293462	0.489858	0.242823	0.512596	0.53017	0.48859	0.418565	0.420105	0.832918	0.521836	0.410684	0.500095	0.257045	0.488228	0.387584	0.415757	0.795505	0.371912	0.343829	0.737075	0.674569	0.784091	0.622752	0.550191	0.742329	0.433603	0.526728	0.436049	0.649476	0.810452	0.346185	0.545208	0.649567	0.557347	0.438223	0.190915	0.49629
cg00962635	0.513932	0.455609	0.483895	0.358497	0.278246	0.665036	0.287828	0.0902871	0.46814	0.155796	0.407422	0.339148	0.4815	0.427415	0.474866	0.0788622	0.482237	0.638224	0.116178	0.254014	0.0792307	0.0818105	0.217804	0.447041	0.5143	0.243879	0.239549	0.599527	0.0717676	0.149255	0.441789	0.117467	0.0758217	0.482513	0.313258	0.407237	0.388257	0.143542	0.385401	0.100883	0.461782	0.352048	0.122074	0.174961	0.289579	0.218081	0.644029	0.0877073	0.578796
cg00964109	0.022697	0.0279549	0.0264827	0.0277446	0.0254311	0.0191217	0.0216455	0.0216455	0.0241692	0.0203836	0.0239589	0.0212248	0.022697	0.0245899	0.0229074	0.0220661	0.0235383	0.0212248	0.0254311	0.0262724	0.0224867	0.0231177	0.022697	0.0224867	0.0203836	0.0254311	0.0187011	0.0248002	0.0201733	0.0189114	0.0252208	0.0180701	0.0298477	0.023328	0.0231177	0.0208042	0.0212248	0.0222764	0.0260621	0.0220661	0.0237486	0.0195423	0.0222764	0.0212248	0.0224867	0.0189114	0.0210145	0.0151257	0.0216455
cg00967316	0.925786	0.306415	0.869136	0.887632	0.652027	0.928981	0.813648	0.311644	0.597023	0.766973	0.919104	0.638567	0.944863	0.860905	0.958226	0.5457	0.807451	0.900608	0.62898	0.435693	0.934501	0.568553	0.560709	0.179171	0.848316	0.87727	0.338855	0.910776	0.387952	0.299055	0.837373	0.930143	0.747508	0.606417	0.785759	0.67672	0.391244	0.79951	0.675752	0.213258	0.231269	0.582692	0.875818	0.849478	0.873494	0.370618	0.859355	0.687663	0.531755
cg00968475	0.420413	0.459802	0.418107	0.430929	0.482771	0.585993	0.0822425	0.0672066	0.168584	0.0857478	0.61791	0.0865781	0.500943	0.0765233	0.442921	0.0804899	0.432497	0.439416	0.123661	0.086947	0.0666531	0.127166	0.299111	0.326877	0.307782	0.685895	0.598446	0.622061	0.0728335	0.0711731	0.786258	0.183251	0.0863013	0.0672988	0.250959	0.503526	0.0822425	0.0988467	0.495778	0.0589968	0.475207	0.634238	0.575477	0.551586	0.101891	0.164525	0.590698	0.0679445	0.276972
cg00969271	0.825787	0.910265	0.806595	0.846293	0.845329	0.794852	0.8675	0.780393	0.8916	0.779692	0.887393	0.763567	0.8512	0.869691	0.829643	0.726323	0.855933	0.851989	0.644736	0.802301	0.912281	0.657092	0.811152	0.780831	0.882135	0.892564	0.767773	0.859526	0.84121	0.885728	0.866624	0.887744	0.879418	0.866712	0.849974	0.73088	0.830168	0.80344	0.4572	0.771717	0.874774	0.863469	0.809837	0.838494	0.863732	0.845504	0.871269	0.918941	0.831308
cg00969446	0.447139	0.443931	0.382612	0.609399	0.441573	0.397329	0.379122	0.488553	0.588551	0.375254	0.340726	0.45761	0.578457	0.46044	0.309218	0.611663	0.482044	0.597418	0.352047	0.366952	0.224597	0.476384	0.361952	0.447233	0.477893	0.460535	0.468553	0.567891	0.417989	0.445441	0.473365	0.67553	0.554684	0.468082	0.575909	0.46827	0.51742	0.506854	0.665719	0.328934	0.609682	0.568645	0.520722	0.389687	0.469969	0.677511	0.648644	0.326764	0.571664
cg00970325	0.138049	0.755522	0.359841	0.774326	0.480094	0.760357	0.770386	0.757492	0.71881	0.601243	0.595602	0.628374	0.755253	0.458336	0.472484	0.696067	0.670548	0.160344	0.728033	0.427624	0.763491	0.778355	0.748538	0.703141	0.579753	0.729645	0.557995	0.721407	0.861449	0.282478	0.914815	0.340679	0.310862	0.119514	0.583066	0.288656	0.261794	0.577425	0.802173	0.859121	0.760089	0.676457	0.504808	0.522089	0.624255	0.233678	0.7326	0.184431	0.453501
cg00971396	0.0750584	0.0664012	0.0605144	0.056359	0.0573978	0.0598218	0.0504721	0.0508184	0.0615532	0.0664012	0.0383521	0.0508184	0.0473555	0.046663	0.0449315	0.0494333	0.0580904	0.0477018	0.0480481	0.0556664	0.0435464	0.0580904	0.0445853	0.0695178	0.0767898	0.0608607	0.0477018	0.0432001	0.0452778	0.0459704	0.0508184	0.0504721	0.0487407	0.0584367	0.0487407	0.0556664	0.0584367	0.0535887	0.0445853	0.0497795	0.0729807	0.0532424	0.0532424	0.0470093	0.0560127	0.0535887	0.0518572	0.0404298	0.0525498
cg00973286	0.0297196	0.0265133	0.0257118	0.0211696	0.0322578	0.0249102	0.0259789	0.025311	0.0359984	0.0389375	0.0182305	0.0211696	0.0238414	0.0218375	0.0202344	0.0358648	0.0257118	0.0235743	0.0255782	0.0226391	0.016761	0.0526976	0.0281164	0.0269141	0.0299867	0.0207688	0.0178297	0.0188985	0.0333266	0.0250438	0.0250438	0.0238414	0.0279828	0.0323914	0.0401398	0.0305211	0.0254446	0.029586	0.0235743	0.0230399	0.0254446	0.0235743	0.0294524	0.0322578	0.0219711	0.023975	0.0354641	0.0122188	0.0281164
cg00973334	0.0263143	0.0420783	0.0304872	0.0300235	0.0304872	0.046483	0.0209824	0.0277053	0.0182005	0.0221415	0.0281689	0.0202869	0.0358191	0.0212142	0.0297917	0.0270098	0.0300235	0.0469466	0.0258507	0.0367464	0.0286326	0.0246916	0.0281689	0.0179687	0.0207506	0.0369782	0.0279371	0.0404556	0.0311826	0.0309508	0.0390646	0.0244598	0.0413829	0.0209824	0.0369782	0.029328	0.0274735	0.030719	0.0316463	0.0367464	0.0323418	0.0195915	0.0374419	0.0641016	0.0295599	0.0200551	0.0360509	0.026778	0.0165778
cg00973677	0.423611	0.0881219	0.56115	0.600585	0.312554	0.702073	0.401573	0.451737	0.542496	0.467975	0.569656	0.236874	0.501514	0.299892	0.449321	0.311878	0.373253	0.421774	0.443231	0.248182	0.477157	0.440428	0.366004	0.0671479	0.296993	0.70043	0.0809695	0.526161	0.675299	0.303372	0.627842	0.493685	0.0604787	0.725367	0.305402	0.302019	0.387655	0.242963	0.190963	0.282881	0.318354	0.528868	0.491752	0.337394	0.462369	0.291773	0.599619	0.522392	0.0789397
cg00974864	0.79794	0.806408	0.652485	0.819203	0.562163	0.66942	0.763787	0.313309	0.842442	0.712981	0.537607	0.712793	0.774325	0.750992	0.460081	0.452837	0.84169	0.79126	0.679769	0.65399	0.864364	0.682122	0.526317	0.842066	0.635926	0.506559	0.311145	0.510981	0.808289	0.654931	0.794271	0.628305	0.261468	0.865775	0.663587	0.677794	0.799445	0.359598	0.84009	0.593776	0.851004	0.525282	0.713734	0.380768	0.686544	0.40109	0.761153	0.174533	0.332408
cg00977690	0.0550487	0.0612867	0.0464195	0.0589995	0.0594153	0.0514099	0.0489147	0.0516178	0.0552567	0.0527615	0.0396616	0.0487067	0.0214674	0.0482909	0.0277054	0.0708517	0.0595193	0.0592074	0.0488107	0.0706438	0.0390378	0.0875904	0.0619105	0.066901	0.0551527	0.0797929	0.0791691	0.0454838	0.0695001	0.0419489	0.0237547	0.0570241	0.0315522	0.0516178	0.0560884	0.0577519	0.0564003	0.0954919	0.060559	0.0752183	0.0525535	0.0567122	0.0544249	0.0673168	0.0676287	0.0471472	0.0515138	0.022611	0.0587915
cg00979348	0.0352298	0.134861	0.0631265	0.0359544	0.0330561	0.067474	0.0355921	0.040302	0.0326938	0.0555183	0.0232741	0.0229118	0.0312446	0.0721839	0.0163905	0.0384905	0.0417511	0.0316069	0.0432003	0.0671118	0.0149414	0.0852265	0.0272594	0.0689232	0.0576921	0.108776	0.064938	0.0207381	0.0388528	0.0232741	0.0663872	0.0316069	0.0374036	0.0308823	0.0301577	0.0319692	0.0609527	0.0508085	0.0156659	0.0627642	0.0768937	0.0352298	0.0417511	0.0446495	0.0160282	0.0178397	0.0377659	0.0156659	0.0435626
cg00980978	0.0711468	0.0711468	0.0664514	0.0597736	0.0803288	0.0766769	0.0762595	0.082207	0.077929	0.0714598	0.0646776	0.06113	0.0598779	0.065095	0.0540348	0.0697904	0.367164	0.0688513	0.0596692	0.0917021	0.0529914	0.0881545	0.0716685	0.0703121	0.0684339	0.0610257	0.0741727	0.0631125	0.0630082	0.0586258	0.0570607	0.193435	0.0601909	0.0633212	0.0793898	0.0834591	0.455541	0.468897	0.0617561	0.0679122	0.0632168	0.775452	0.117057	0.0667645	0.0702077	0.0667645	0.559361	0.0485047	0.0749031
cg00981643	0.389065	0.0667628	0.360092	0.446273	0.384636	0.396631	0.0757131	0.0810648	0.419976	0.0870624	0.0746981	0.0676855	0.217257	0.0722991	0.354556	0.0837407	0.210798	0.475984	0.0819875	0.0737754	0.0689773	0.0878929	0.0937059	0.439537	0.459837	0.0770049	0.315525	0.173151	0.0822643	0.0750672	0.271051	0.121941	0.175181	0.0776508	0.321523	0.427542	0.0771894	0.105886	0.246968	0.0806035	0.399768	0.568347	0.22713	0.0965663	0.0856784	0.0833716	0.308236	0.058643	0.282031
cg00983520	0.176875	0.256562	0.23766	0.115072	0.368494	0.208379	0.233027	0.236918	0.371552	0.327539	0.339584	0.248315	0.231359	0.0685568	0.0786567	0.172428	0.228394	0.180118	0.21783	0.20421	0.0623487	0.0667037	0.196704	0.295757	0.316512	0.370996	0.25406	0.242478	0.183825	0.257489	0.360896	0.259712	0.124616	0.24952	0.187624	0.184659	0.146854	0.346534	0.278151	0.0729118	0.29761	0.230525	0.0708733	0.199021	0.0940381	0.143425	0.343754	0.0728191	0.24813
[truncated: 21,998 more rows]
[truncated: 103 more columns]
