# Supplementary material for: Molecular subtypes based on DNA methylation predict prognosis in colon adenocarcinoma patients
Source: Aging (Albany NY). 2019 Dec 18;11(24):11880–92. doi: 10.18632/aging.102492 (PMC6949097; doi:10.18632/aging.102492)
Supplement: Supplementary Table 5 [file aging-11-102492-s005..xlsx]

## Sheet: Supplementary Table 6
row.names(vd.clinical)	A1_OS	A2_Event	A3_T	A4_N	A5_M	A6_Stage	additional_studies	additional_studies.additional_study.disease_code	additional_studies.additional_study.project_code	age_at_initial_pathologic_diagnosis	anatomic_neoplasm_subdivision	bcr_patient_barcode	bcr_patient_uuid	braf_gene_analysis_performed	braf_gene_analysis_result	circumferential_resection_margin	colon_polyps_present	day_of_form_completion	days_to_birth	days_to_death	days_to_initial_pathologic_diagnosis	days_to_last_followup	days_to_last_known_alive	drugs	drugs.drug.bcr_drug_barcode	drugs.drug.bcr_drug_uuid	drugs.drug.clinical_trail_drug_classification	drugs.drug.day_of_form_completion	drugs.drug.days_to_drug_therapy_end	drugs.drug.days_to_drug_therapy_start	drugs.drug.drug_name	drugs.drug.measure_of_response	drugs.drug.month_of_form_completion	drugs.drug.number_cycles	drugs.drug.prescribed_dose	drugs.drug.prescribed_dose_units	drugs.drug.regimen_indication	drugs.drug.regimen_indication_notes	drugs.drug.regimen_number	drugs.drug.route_of_administrations.route_of_administration	drugs.drug.therapy_ongoing	drugs.drug.therapy_types.therapy_type	drugs.drug.therapy_types.therapy_type_notes	drugs.drug.total_dose	drugs.drug.total_dose_units	drugs.drug.tx_on_clinical_trial	drugs.drug.year_of_form_completion	ethnicity	follow_ups
TCGA-AA-3812	1066	Alive	T3	N0	M0	Stage IIA	NA			82	Sigmoid Colon	TCGA-AA-3812	4563e4e0-a661-46de-ad25-9c86a621e147	NO	Not Available	Not Available	Not Available	18	-29980	Not Applicable	0	0	Not Available	NA																								Not Available	NA
TCGA-AA-A01Z	1126	Alive	T3	N0	M0	Stage II	NA			68	Ascending Colon	TCGA-AA-A01Z	c9e829d9-cd08-41a9-a5a4-34f2d7d619c7	NO	Not Available	Not Available	Not Available	15	-24990	Not Applicable	0	0	Not Available	NA																								Not Available	NA
TCGA-AA-3846	518	Alive	T3	N0	M0	Stage IIA	NA			74	Sigmoid Colon	TCGA-AA-3846	f2ef5afa-6191-43a1-a023-d53c0d985139	NO	Not Available	Not Available	Not Available	18	-27057	Not Applicable	0	31	Not Available	NA																								Not Available	NA
TCGA-AA-3693	0	Alive	T4	N1	M1	Stage IV	NA			77	Sigmoid Colon	TCGA-AA-3693	33522271-b2ca-4da4-a942-501ab9117c51	NO	Not Available	Not Available	Not Available	18	-28459	Not Applicable	0	0	Not Available	NA																								Not Available	NA
TCGA-AA-3710	821	Alive	T3	N0	M0	Stage IIA	NA			80	Hepatic Flexure	TCGA-AA-3710	f5c3bc61-1018-4351-bb23-aacc1459365f	NO	Not Available	Not Available	Not Available	18	-29465	Not Applicable	0	31	Not Available	NA																								Not Available	NA
TCGA-AA-3695	0	Alive	T3	N2	M1	Stage IV	NA			63	Cecum	TCGA-AA-3695	23d0681a-912a-408f-b19a-0bbcf5ffc2f3	NO	Not Available	Not Available	Not Available	18	-23164	Not Applicable	0	0	Not Available	NA																								Not Available	NA
TCGA-AA-3530	580	Alive	T2	N0	M0	Stage I	NA			80	Cecum	TCGA-AA-3530	1ad0b9b9-7ded-4281-b114-9dcc6138c037	NO	Not Available	Not Available	Not Available	18	-29402	Not Applicable	0	0	Not Available	NA																								Not Available	NA
TCGA-AA-A02Y	1216	Alive	T2	N0	M0	Stage I	NA			73	Cecum	TCGA-AA-A02Y	a435fdf4-a89a-499e-9006-cbb5693eab26	NO	Not Available	Not Available	Not Available	15	-26724	Not Applicable	0	31	Not Available	NA																								Not Available	NA
TCGA-AA-A022	0	Alive	T4	N0	M0	Stage II	NA			88	Cecum	TCGA-AA-A022	7a481097-14a3-4916-9632-d899c25fd284	NO	Not Available	Not Available	Not Available	15	-32446	Not Applicable	0	0	Not Available	NA																								Not Available	NA
TCGA-AA-3956	1035	Alive	T3	N0	M0	Stage IIA	NA			65	Cecum	TCGA-AA-3956	7b47489f-c3cc-4388-b5d7-c7c02790a5f6	NO	Not Available	Not Available	Not Available	18	-24045	Not Applicable	0	0	Not Available	NA																								Not Available	NA
TCGA-AA-3525	1	Alive	T3	N1	M0	Stage IIIB	NA			90	Hepatic Flexure	TCGA-AA-3525	b107565b-7558-4745-952b-689178367e1c	NO	Not Available	Not Available	Not Available	18	-32871	Not Applicable	0	0	Not Available	NA																								Not Available	NA
TCGA-AA-A01I	943	Alive	T2	N0	M0	Stage I	NA			76	Sigmoid Colon	TCGA-AA-A01I	86d18004-9478-4e46-83b4-4fbe445ccb70	NO	Not Available	Not Available	Not Available	15	-27759	Not Applicable	0	31	Not Available	NA																								Not Available	NA
TCGA-AA-3520	731	Alive	T3	N0	M0	Stage II	NA			86	Ascending Colon	TCGA-AA-3520	5f1399ef-8100-49e7-806f-9f532e55c0ba	NO	Not Available	Not Available	Not Available	18	-31531	Not Applicable	0	0	Not Available	NA																								Not Available	NA
TCGA-AA-3975	1036	Alive	T2	N0	M0	Stage I	NA			80	Sigmoid Colon	TCGA-AA-3975	a9cb21d1-4c4a-4f30-ad4d-c54bed26f187	NO	Not Available	Not Available	Not Available	18	-29310	Not Applicable	0	30	Not Available	NA																								Not Available	NA
TCGA-AA-3560	608	Alive	T3	N2	M0	Stage IIIC	NA			72	Sigmoid Colon	TCGA-AA-3560	2d02bd7a-5beb-4e43-9ccb-18d89c9d5ca2	NO	Not Available	Not Available	Not Available	18	-26359	Not Applicable	0	0	Not Available	NA	TCGA-AA-3560-D37463;TCGA-AA-3560-D37464;TCGA-AA-3560-D37465	03F2E068-151A-44F5-A6DD-2D04EC99B0BF;BADECE76-E2D5-4E8F-AA08-EFAF10FA5EAB;1791EB2A-6782-4676-B313-4B8F73B36DD0	Not Available;Not Available;Not Available	3;3;3	212;212;212	31;31;31	Folinic acid;5-Fluorouracil;Oxaliplatin	Complete Response;Complete Response;Complete Response	12;12;12	Not Available;Not Available;Not Available	Not Available;Not Available;Not Available	Not Available;Not Available;Not Available	Not Available;Not Available;Not Available	Not Applicable;Not Applicable;Not Applicable	Not Available;Not Available;Not Available	Not Available;Not Available;Not Available	NO;NO;NO	Chemotherapy;Chemotherapy;Chemotherapy	Not Available;Not Available;Not Available	Not Available;Not Available;Not Available	Not Available;Not Available;Not Available	NO;NO;NO	2012;2012;2012	Not Available	NA
TCGA-AA-3862	914	Alive	T3	N0	M0	Stage IIA	NA			82	Transverse Colon	TCGA-AA-3862	05ff79c5-1127-4cac-8f4c-84089a3f2cde	NO	Not Available	Not Available	Not Available	18	-30163	Not Applicable	0	31	Not Available	NA																								Not Available	NA
TCGA-AA-3673	1522	Alive	T3	N0	M0	Stage II	NA			53	Transverse Colon	TCGA-AA-3673	628408ce-0691-4e0b-b4c7-aca9a0d73bb0	NO	Not Available	Not Available	Not Available	18	-19509	Not Applicable	0	0	Not Available	NA																								Not Available	NA
TCGA-AA-3667	426	Alive	T2	N0	M0	Stage I	NA			36	Sigmoid Colon	TCGA-AA-3667	d651f9ba-8746-46c4-852c-6c2992c7d10e	NO	Not Available	Not Available	Not Available	18	-13302	Not Applicable	0	0	Not Available	NA																								Not Available	NA
TCGA-AA-A024	1188	Dead	T3	N0	M0	Stage II	NA			81	Descending Colon	TCGA-AA-A024	d4e1472a-7b5f-46f4-acb7-b961f634e28e	NO	Not Available	Not Available	Not Available	15	-29708	Not Applicable	0	61	Not Available	NA																								Not Available	NA
TCGA-AA-3856	30	Alive	T3	N0	M0	Stage IIA	NA			59	Sigmoid Colon	TCGA-AA-3856	0b8de222-119a-40f3-8beb-12b9d933225b	NO	Not Available	Not Available	Not Available	18	-21670	Not Applicable	0	30	Not Available	NA																								Not Available	NA
TCGA-AA-3561	424	Alive	T3	N0	M0	Stage IIA	NA			72	Ascending Colon	TCGA-AA-3561	01ad5016-f691-4bca-82a0-910429d8d25b	NO	Not Available	Not Available	Not Available	18	-26420	Not Applicable	0	0	Not Available	NA																								Not Available	NA
TCGA-AA-3842	1126	Alive	T2	N1	M0	Stage IIIA	NA			51	Sigmoid Colon	TCGA-AA-3842	80311cf5-7e18-4545-92ad-c4b7dd5c9677	NO	Not Available	Not Available	Not Available	18	-18842	Not Applicable	0	31	Not Available	NA	TCGA-AA-3842-D37475;TCGA-AA-3842-D37476;TCGA-AA-3842-D37477	ADAADEA5-5CC5-4AA4-BA47-150B275E7461;8940A6B1-1A17-428B-9929-BD7948D255D9;2CE1D74C-9405-46AD-BC26-F102D37AE18D	Not Available;Not Available;Not Available	3;3;3	212;212;212	59;59;59	Folinic acid;5-Fluorouracil;Oxaliplatin	Unknown;Unknown;Unknown	12;12;12	Not Available;Not Available;Not Available	Not Available;Not Available;Not Available	Not Available;Not Available;Not Available	Not Available;Not Available;Not Available	Not Applicable;Not Applicable;Not Applicable	Not Available;Not Available;Not Available	Not Available;Not Available;Not Available	NO;NO;NO	Chemotherapy;Chemotherapy;Chemotherapy	Not Available;Not Available;Not Available	Not Available;Not Available;Not Available	Not Available;Not Available;Not Available	NO;NO;NO	2012;2012;2012	Not Available	NA
TCGA-AA-3977	761	Alive	T2	N0			NA			65	Sigmoid Colon	TCGA-AA-3977	33e989b9-fac4-47d8-b429-269044ac772a	NO	Not Available	Not Available	Not Available	18	-23832	Not Applicable	0	31	Not Available	NA																								Not Available	NA
TCGA-AA-3696	153	Dead	T3	N1	M1	Stage IV	NA			75	Sigmoid Colon	TCGA-AA-3696	aa909ffb-03e1-4e3f-8888-2212b23d90b7	NO	Not Available	Not Available	YES	18	-27667	Not Applicable	0	0	Not Available	NA																								Not Available	NA
TCGA-AA-3968	669	Alive	T2	N0	M0	Stage I	NA			55	Sigmoid Colon	TCGA-AA-3968	cab7bdbc-0a11-4901-97c3-26b884f79cb5	NO	Not Available	Not Available	Not Available	18	-20089	Not Applicable	0	0	Not Available	NA																								Not Available	NA
TCGA-AA-3994	822	Alive	T3	N1	M0	Stage IIIB	NA			69	Transverse Colon	TCGA-AA-3994	750770db-53cf-4021-a8c2-5e0ddb97fef5	NO	Not Available	Not Available	Not Available	18	-25323	Not Applicable	0	0	Not Available	NA	TCGA-AA-3994-D37439	09F57FC8-2E45-4B15-83F1-490E1762A214	Not Available	3	334	30	Capecitabine	Complete Response	12	Not Available	Not Available	Not Available	Not Available	Not Applicable	Not Available	Not Available	NO	Chemotherapy	Not Available	Not Available	Not Available	NO	2012	Not Available	NA
TCGA-AA-3966	61	Alive	T3	N0	M0	Stage IIA	NA			89	Hepatic Flexure	TCGA-AA-3966	bc42fe2d-1a33-428d-a601-b1871f4c8d9b	NO	Not Available	Not Available	Not Available	18	-32537	Not Applicable	0	61	Not Available	NA																								Not Available	NA
TCGA-AA-3543	30	Alive	T2	N0	M0	Stage I	NA			84	Cecum	TCGA-AA-3543	912b61a1-6a5b-451c-b753-9c3dac03e8cb	NO	Not Available	Not Available	Not Available	18	-30772	Not Applicable	0	0	Not Available	NA																								Not Available	NA
TCGA-AA-3972	1551	Alive	T3	N1	M1	Stage IV	NA			72	Sigmoid Colon	TCGA-AA-3972	93cd5d07-e0d3-40f8-ae7f-beadb1efb7c1	NO	Not Available	Not Available	Not Available	18	-26360	Not Applicable	0	0	Not Available	NA	TCGA-AA-3972-D37426;TCGA-AA-3972-D37427;TCGA-AA-3972-D37428;TCGA-AA-3972-D37429;TCGA-AA-3972-D37430;TCGA-AA-3972-D37431	45D2A60B-C35E-4BAC-9769-B1D5C0153FED;2DAFDB28-A410-42B2-AF63-E120355C65F7;DB748C7A-3F23-4440-959F-0652EF839B25;96844749-3509-4378-99E8-349FDEC7EFE8;A6074E5B-5C69-431C-837C-BFE344753B77;D468F9E0-47B4-4132-AD13-0ABB40C4E310	Not Available;Not Available;Not Available;Not Available;Not Available;Not Available	3;3;3;3;3;3	1246;1246;1369;1369;1369;1369	60;60;1277;1277;1277;1246	Capecitabine;Oxaliplatin;Folinic acid;5-Fluoruoracil;Oxaliplatin;Bevacizumab	Clinical Progressive Disease;Clinical Progressive Disease;Clinical Progressive Disease;Clinical Progressive Disease;Clinical Progressive Disease;Clinical Progressive Disease	12;12;12;12;12;12	Not Available;Not Available;Not Available;Not Available;Not Available;Not Available	Not Available;Not Available;Not Available;Not Available;Not Available;Not Available	Not Available;Not Available;Not Available;Not Available;Not Available;Not Available	Not Available;Not Available;Not Available;Not Available;Not Available;Not Available	Not Applicable;Not Applicable;Not Applicable;Not Applicable;Not Applicable;Not Applicable	Not Available;Not Available;Not Available;Not Available;Not Available;Not Available	Not Available;Not Available;Not Available;Not Available;Not Available;Not Available	NO;NO;NO;NO;NO;NO	Chemotherapy;Chemotherapy;Chemotherapy;Chemotherapy;Chemotherapy;Targeted Molecular therapy	Not Available;Not Available;Not Available;Not Available;Not Available;Not Available	Not Available;Not Available;Not Available;Not Available;Not Available;Not Available	Not Available;Not Available;Not Available;Not Available;Not Available;Not Available	NO;NO;NO;NO;NO;NO	2012;2012;2012;2012;2012;2012	Not Available	NA
TCGA-AA-3544	426	Alive	T2	N0	M0	Stage I	NA			68	Sigmoid Colon	TCGA-AA-3544	e831369c-78c0-4c75-9cf3-f46ed669312e	NO	Not Available	Not Available	Not Available	18	-24959	Not Applicable	0	0	Not Available	NA																								Not Available	NA
TCGA-A6-2683	504	Dead	T4	N0	M1	Stage IV	NA			57	Ascending Colon	TCGA-A6-2683	fafd4576-0709-49e1-926f-ad1ee09907ec	NO	Not Available	Not Available	NO	18	-20871	Not Applicable	0	472	Not Available	NA	TCGA-A6-2683-D4970;TCGA-A6-2683-D4959;TCGA-A6-2683-D4967;TCGA-A6-2683-D4963;TCGA-A6-2683-D4964;TCGA-A6-2683-D4968;TCGA-A6-2683-D4966;TCGA-A6-2683-D4960;TCGA-A6-2683-D4961;TCGA-A6-2683-D4969;TCGA-A6-2683-D4962	e3bedc74-6ed7-4959-8d5c-fb6ccfc417a5;dfdef027-98d3-4ae2-82b7-d26157156291;b7e6fdf1-0994-4881-8f03-6dcd65d58c18;da116895-1b80-4709-94ed-70230241fc46;055caca7-c379-485e-8fa9-9f66029b7acb;62e33cf5-3a37-43dc-8fdb-c2258a9c910b;616c70ed-f4d1-4ac8-bcd5-95fb57094d0a;0b8a83b5-8223-41a9-b90f-e9b2b1a54ae8;8e1fe263-78d0-40af-a3a7-8cb7a9185893;6a41add5-5273-4d56-b4b0-6b9065dd9ddf;1f797061-446e-4ba7-8117-30d48…	Not Available;Not Available;Not Available;Not Available;Not Available;Not Available;Not Available;Not Available;Not Available;Not Available;Not Available	18;18;18;18;18;18;18;18;18;18;18	443;287;350;287;350;352;350;287;287;350;289	443;48;322;105;322;322;322;48;48;322;48	Mitomycin C;Irinotecan;Leucovorin;Avastin;Oxaliplatin;5 FU;5 FU;5 FU;Levcovorin;Avastin;5 FU	Not Available;Not Available;Not Available;Not Available;Not Available;Not Available;Not Available;Not Available;Not Available;Not Available;Not Available	10;10;10;10;10;10;10;10;10;10;10	1;12;3;12;3;3;3;16;16;3;16	16;300;650;275;140;3950;650;625;625;300;4000	mg;mg;mg;mg;mg;mg;mg;mg;mg;mg;mg	PROGRESSION;ADJUVANT;PROGRESSION;ADJUVANT;PROGRESSION;PROGRESSION;PROGRESSION;ADJUVANT;ADJUVANT;PROGRESSION;ADJUVANT	Not Applicable;Not Applicable;Not Applicable;Not Applicable;Not Applicable;Not Applicable;Not Applicable;Not Applicable;Not Applicable;Not Applicable;Not Applicable	3;1;2;1;2;2;2;1;1;2;1	IV;IV;IV;IV;IV;Not Available;IV;IV;IV;IV;Not Available	NO;NO;NO;NO;NO;NO;NO;NO;NO;NO;NO	Chemotherapy;Chemotherapy;Other, specify in notes;Targeted Molecular therapy;Chemotherapy;Chemotherapy;Chemotherapy;Chemotherapy;Other, specify in notes;Targeted Molecular therapy;Chemotherapy	Not Available;Not Available;Ancillary Agent;Not Available;Not Available;Not Available;Not Available;Not Available;Ancillary;Not Available;Not Available	16;3365;1950;3210;420;11850;1950;10050;10050;900;60525	mg;mg;mg;mg;mg;mg;mg;mg;mg;mg;mg	Not Available;Not Available;Not Available;Not Available;Not Available;Not Available;Not Available;Not Available;Not Available;Not Available;Not Available	2010;2010;2010;2010;2010;2010;2010;2010;2010;2010;2010	NOT HISPANIC OR LATINO	NA
TCGA-AA-A004	424	Alive	T3	N0	M0	Stage IIA	NA			76	Sigmoid Colon	TCGA-AA-A004	d2c99bed-3446-4d12-99e0-00611faa37dc	NO	Not Available	Not Available	Not Available	15	-27943	Not Applicable	0	31	Not Available	NA																								Not Available	NA
TCGA-A6-2674	1331	Alive	T3	N2	M1	Stage IV	NA	FPPP	TCGA	71	Sigmoid Colon	TCGA-A6-2674	57cdaa1c-4e94-4a28-ab3b-300c0457555f	NO	Not Available	Not Available	NO	15	-26292	Not Applicable	0	523	Not Available	NA	TCGA-A6-2674-D4952;TCGA-A6-2674-D4948;TCGA-A6-2674-D4949;TCGA-A6-2674-D4947;TCGA-A6-2674-D4951;TCGA-A6-2674-D18367;TCGA-A6-2674-D18369;TCGA-A6-2674-D18370;TCGA-A6-2674-D18366;TCGA-A6-2674-D18368	3ce98d9a-0b40-4e25-9ba2-58794d288247;b5b3adc2-ffb4-480a-866c-996bf91eed24;5022a88e-849c-499e-8708-80ef8f39165c;365ae66b-f33f-45f3-8894-0ad421609e63;5a028017-d8ab-465a-8dca-6416332d59d8;ba5c0262-3fbf-4e10-b18e-6d74b224da07;a127ba7d-746f-46df-a7e8-d89a4a9945b6;a2845a5c-66f7-4f7e-879d-33b8d06cb6ba;13dd3946-99d8-43e0-b529-b79140588e52;3779457f-da47-48bc-bb01-e9f988c8a6fc	Not Available;Not Available;Not Available;Not Available;Not Available;Not Available;Not Available;Not Available;Not Available;Not Available	15;15;15;15;15;14;14;14;14;14	237;237;237;237;239;944;944;946;944;944	90;75;75;75;75;761;761;761;761;761	Avastin;Levcovorin;5 FU;Oxaliplatin;5 FU;Oxaliplatin;Fluorouracil;Fluorouracil;Bevacizumab;Leucovorin	Not Available;Not Available;Not Available;Not Available;Not Available;Not Available;Not Available;Not Available;Not Available;Not Available	10;10;10;10;10;11;11;11;11;11	10;12;12;12;12;12;12;12;12;12	440;800;800;170;4800;173-177;812-832;4872-4992;400-448;50-800	mg;mg;mg;mg;mg;mg;mg;mg;mg;mg	ADJUVANT;ADJUVANT;ADJUVANT;ADJUVANT;ADJUVANT;RECURRENCE;RECURRENCE;RECURRENCE;RECURRENCE;RECURRENCE	Not Applicable;Not Applicable;Not Applicable;Not Applicable;Not Applicable;Not Applicable;Not Applicable;Not Applicable;Not Applicable;Not Applicable	1;1;1;1;1;2;2;2;2;2	IV;IV;IV;IV;IV;IV;IV;IV;IV;IV	NO;NO;NO;NO;NO;NO;NO;NO;NO;NO	Targeted Molecular therapy;Other, specify in notes;Chemotherapy;Chemotherapy;Chemotherapy;Chemotherapy;Chemotherapy;Chemotherapy;Targeted Molecular therapy;Other, specify in notes	Not Available;Ancillary;Not Available;Not Available;Not Available;Not Available;Not Available;Not Available;Not Available;ancillary	4400;9150;9150;1950;54600;2093;9852;59112;5173;1750	mg;mg;mg;mg;mg;mg;mg;mg;mg;mg	Not Available;Not Available;Not Available;Not Available;Not Available;Not Available;Not Available;Not Available;Not Available;Not Available	2010;2010;2010;2010;2010;2011;2011;2011;2011;2011	NOT HISPANIC OR LATINO	NA
TCGA-AA-3973	397	Alive	T4	N1	M1	Stage IV	NA			69	Sigmoid Colon	TCGA-AA-3973	e8841edf-e070-425b-b4d4-bbb2115f9dbd	NO	Not Available	Not Available	Not Available	18	-25536	Not Applicable	0	0	Not Available	NA	TCGA-AA-3973-D37432;TCGA-AA-3973-D37433;TCGA-AA-3973-D37434;TCGA-AA-3973-D37435	02288D76-A58F-4E92-B19E-08FA0A8A09A3;8C12A90B-FDED-4D29-B7FA-DCDA7A730754;33052D56-5F11-49F8-BABA-6F23D89EB61D;830E21DE-6412-4062-B970-4C321B01D3D4	Not Available;Not Available;Not Available;Not Available	3;3;3;3	305;305;305;305	31;31;31;Not Available	Folinic acid;5-Fluorouracil;Irinotecan;Bevacizumab	Stable Disease;Stable Disease;Stable Disease;Stable Disease	12;12;12;12	Not Available;Not Available;Not Available;Not Available	Not Available;Not Available;Not Available;Not Available	Not Available;Not Available;Not Available;Not Available	Not Available;Not Available;Not Available;Not Available	Not Applicable;Not Applicable;Not Applicable;Not Applicable	Not Available;Not Available;Not Available;Not Available	Not Available;Not Available;Not Available;Not Available	NO;NO;NO;NO	Chemotherapy;Chemotherapy;Chemotherapy;Targeted Molecular therapy	Not Available;Not Available;Not Available;Not Available	Not Available;Not Available;Not Available;Not Available	Not Available;Not Available;Not Available;Not Available	NO;NO;NO;NO	2012;2012;2012;2012	Not Available	NA
TCGA-A6-3807	1054	Alive	T3	N2	M0	Stage IIIC	NA			53	Sigmoid Colon	TCGA-A6-3807	5116e3b4-2bac-40f5-8046-b9c1783faaa5	NO	Not Available	Not Available	YES	26	-19624	Not Applicable	0	333	Not Available	NA	TCGA-A6-3807-D2548;TCGA-A6-3807-D2549;TCGA-A6-3807-D2547;TCGA-A6-3807-D2550	96c56ecc-18dd-4d47-9052-82db0bb3e1b6;ed12b670-cdaf-487d-823f-f127a5dae4ed;5ef50513-5321-43a8-bc76-7532cf293e1c;4a311e57-72d6-43e9-8b60-bd0c5e8c7bb6	Not Available;Not Available;Not Available;Not Available	26;26;26;26	242;242;242;244	74;74;74;74	Leucovorin;5-FU;Oxaliplatin;5 FU	Not Available;Not Available;Not Available;Not Available	10;10;10;10	12;12;12;12	360-925;360-925;100-195;2150-5500	mg;mg;mg;mg	ADJUVANT;ADJUVANT;ADJUVANT;ADJUVANT	Not Applicable;Not Applicable;Not Applicable;Not Applicable	1;1;1;1	IV;IV;IV;IV	NO;NO;NO;NO	Other, specify in notes;Chemotherapy;Chemotherapy;Chemotherapy	Ancillary;Not Available;Not Available;Not Available	5515;5515;1295;33,350	mg;mg;mg;mg	Not Available;Not Available;Not Available;Not Available	2010;2010;2010;2010	NOT HISPANIC OR LATINO	NA
TCGA-AA-3684	0	Alive	T4	N2	M1	Stage IV	NA			65	Cecum	TCGA-AA-3684	d761bc06-dee8-478a-be99-8af9c504e49c	NO	Not Available	Not Available	Not Available	18	-23741	Not Applicable	0	0	Not Available	NA																								Not Available	NA
TCGA-AA-3841	1124	Alive	T3	N0	M0	Stage IIA	NA			66	Sigmoid Colon	TCGA-AA-3841	7dfbc0ed-e684-4966-8b59-fb6b9e80c129	NO	Not Available	Not Available	Not Available	18	-24230	Not Applicable	0	0	Not Available	NA	TCGA-AA-3841-D37472;TCGA-AA-3841-D37473;TCGA-AA-3841-D37474	906C70DA-8292-4D49-8219-0605D0D83B41;61C33BB9-928A-45B2-9AAE-FE545603CFCF;4C4944D0-9643-4CFB-9322-92554CEE4DA5	Not Available;Not Available;Not Available	3;3;3	242;242;242	59;59;59	Folinic acid;5-Fluorouracil;Oxaliplatin	Complete Response;Complete Response;Complete Response	12;12;12	Not Available;Not Available;Not Available	Not Available;Not Available;Not Available	Not Available;Not Available;Not Available	Not Available;Not Available;Not Available	Not Applicable;Not Applicable;Not Applicable	Not Available;Not Available;Not Available	Not Available;Not Available;Not Available	NO;NO;NO	Chemotherapy;Chemotherapy;Chemotherapy	Not Available;Not Available;Not Available	Not Available;Not Available;Not Available	Not Available;Not Available;Not Available	NO;NO;NO	2012;2012;2012	Not Available	NA
TCGA-AA-3852	0	Dead	T3	N0	M0	Stage IIA	NA			88	Transverse Colon	TCGA-AA-3852	6fc5e56a-1f5e-4ff1-948e-5ef636ebb48d	NO	Not Available	Not Available	Not Available	18	-32203	0	0	Not Available	Not Available	NA																								Not Available	NA
TCGA-A6-2678	1286	Alive	T3	N1	M0	Stage IIIB	NA			43	Transverse Colon	TCGA-A6-2678	3a785e32-7960-4c72-84c4-fb42c4dd86f1	NO	Not Available	Not Available	NO	25	-16030	Not Applicable	0	437	Not Available	NA	TCGA-A6-2678-D2528;TCGA-A6-2678-D2529;TCGA-A6-2678-D2527;TCGA-A6-2678-D2530	62fa0dfa-21c9-4bbf-b910-f7f695e7f169;a47a2727-c80a-47bf-82e3-43613c0f7535;203e134c-6cea-4850-85fb-61d0590d6783;b23a79b4-3671-4ae4-8a1b-461b91a9de9a	Not Available;Not Available;Not Available;Not Available	25;25;25;25	214;214;214;214	60;60;60;60	5- FU;5- FU;Oxaliplatin;Leucovorin	Not Available;Not Available;Not Available;Not Available	10;10;10;10	12;12;12;12	776-804;4656-4872;100-170;800	mg;mg;mg;mg	ADJUVANT;ADJUVANT;ADJUVANT;ADJUVANT	Not Applicable;Not Applicable;Not Applicable;Not Applicable	1;1;1;1	IV;IV;IV;IV	NO;NO;NO;NO	Chemotherapy;Chemotherapy;Chemotherapy;Other, specify in notes	Not Available;Not Available;Not Available;Ancillary	9588;57528;1531;9600	mg;mg;mg;mg	Not Available;Not Available;Not Available;Not Available	2010;2010;2010;2010	NOT HISPANIC OR LATINO	NA
TCGA-AA-3666	61	Dead	T3	N1	M0	Stage III	NA			68	Cecum	TCGA-AA-3666	a512701f-88bb-4b05-8c94-fd285b9dd13e	NO	Not Available	Not Available	Not Available	18	-25020	61	0	Not Available	Not Available	NA																								Not Available	NA
TCGA-AA-3818	30	Dead	T3	N0	M0	Stage IIA	NA			78	Hepatic Flexure	TCGA-AA-3818	fdffda5f-72b2-4153-b7f1-d7043b7ca898	NO	Not Available	Not Available	Not Available	18	-28763	30	0	Not Available	Not Available	NA																								Not Available	NA
TCGA-AA-3672	0	Alive	T3	N1	M0	Stage III	NA			90	Transverse Colon	TCGA-AA-3672	c46971a1-cbac-425d-bac2-f4142c92522e	NO	Not Available	Not Available	Not Available	18	-32873	Not Applicable	0	0	Not Available	NA																								Not Available	NA
TCGA-AA-3678	1430	Alive	T2	N1	M0	Stage III	NA			60	Sigmoid Colon	TCGA-AA-3678	c616f95f-4ea1-4019-8c17-041878085c88	NO	Not Available	Not Available	Not Available	18	-22219	Not Applicable	0	0	Not Available	NA	TCGA-AA-3678-D37451;TCGA-AA-3678-D37452	A670C33A-E236-4318-9A49-820A1091CD06;12C68CEF-0CF7-4B84-9CF2-95B80C236707	Not Available;Not Available	3;3	242;242	30;30	Folinic acid;5-Fluorouracil	Complete Response;Complete Response	12;12	Not Available;Not Available	Not Available;Not Available	Not Available;Not Available	Not Available;Not Available	Not Applicable;Not Applicable	Not Available;Not Available	Not Available;Not Available	NO;NO	Chemotherapy;Chemotherapy	Not Available;Not Available	Not Available;Not Available	Not Available;Not Available	NO;NO	2012;2012	Not Available	NA
TCGA-AA-3986	580	Alive	T2	N0	M0	Stage I	NA			73	Transverse Colon	TCGA-AA-3986	04d7a52f-a89b-4114-a608-a6254b4d604f	NO	Not Available	Not Available	Not Available	18	-26967	Not Applicable	0	30	Not Available	NA																								Not Available	NA
TCGA-AA-3989	242	Dead	T3	N2	M1	Stage IV	NA			84	Transverse Colon	TCGA-AA-3989	d5619045-060a-4b60-86e4-6a5774994fd4	NO	Not Available	Not Available	Not Available	18	-30712	Not Applicable	0	0	Not Available	NA																								Not Available	NA
TCGA-AA-3867	731	Alive	T3	N2	M1	Stage IV	NA			74	Sigmoid Colon	TCGA-AA-3867	d655bbf6-c710-411d-aff5-ceb0fb6e6680	NO	Not Available	Not Available	Not Available	18	-27028	Not Applicable	0	0	Not Available	NA																								Not Available	NA
TCGA-AA-3947	1004	Alive	T4	N0	M0	Stage IIB	NA			60	Ascending Colon	TCGA-AA-3947	654c6f5c-3e5c-49f0-b53f-87cd9797d7c9	NO	Not Available	Not Available	Not Available	18	-22035	Not Applicable	0	30	Not Available	NA																								Not Available	NA
TCGA-AA-A01F	974	Alive	T3	N1	M0	Stage IIIB	NA			72	Sigmoid Colon	TCGA-AA-A01F	132229e5-947d-43e9-a54c-a97d4be7d604	NO	Not Available	Not Available	Not Available	15	-26298	Not Applicable	0	31	Not Available	NA	TCGA-AA-A01F-D37400;TCGA-AA-A01F-D37401;TCGA-AA-A01F-D37402	A2B884E1-ED59-4356-819B-62212890077A;988E2E95-014A-4780-BDFE-813A1F8ACD26;AED5627D-9A57-44F6-82C4-CDAC2CB1EE4C	Not Available;Not Available;Not Available	3;3;3	215;215;215	62;62;62	Folinic acid;5-Fluorouracil;Oxaliplatin	Complete Response;Complete Response;Complete Response	12;12;12	Not Available;Not Available;Not Available	Not Available;Not Available;Not Available	Not Available;Not Available;Not Available	Not Available;Not Available;Not Available	Not Applicable;Not Applicable;Not Applicable	Not Available;Not Available;Not Available	Not Available;Not Available;Not Available	NO;NO;NO	Chemotherapy;Chemotherapy;Chemotherapy	Not Available;Not Available;Not Available	Not Available;Not Available;Not Available	Not Available;Not Available;Not Available	NO;NO;NO	2012;2012;2012	Not Available	NA
TCGA-AA-3984	0	Alive	T3	N0	M0	Stage IIA	NA			61	Sigmoid Colon	TCGA-AA-3984	db246424-3979-4f23-b316-8d30c449ee15	NO	Not Available	Not Available	Not Available	18	-22585	Not Applicable	0	0	Not Available	NA																								Not Available	NA
TCGA-AA-A01V	31	Alive	T2	N0	M0	Stage I	NA			59	Cecum	TCGA-AA-A01V	0cb0dac8-4ce2-444a-b1ae-1550e065b4d9	NO	Not Available	Not Available	Not Available	15	-21792	Not Applicable	0	31	Not Available	NA																								Not Available	NA
TCGA-AA-3552	396	Dead	T3	N2	M0	Stage IIIC	NA			85	Cecum	TCGA-AA-3552	265d7b06-65fe-42c5-ad21-e6b160e94718	NO	Not Available	Not Available	Not Available	18	-31290	Not Applicable	0	0	Not Available	NA																								Not Available	NA
TCGA-AA-A02H	61	Dead	T3	N2	M1	Stage IV	NA			74	Sigmoid Colon	TCGA-AA-A02H	69fb431f-0caf-4cdd-9085-eda5b18ed15d	NO	Not Available	Not Available	Not Available	15	-27362	61	0	Not Available	Not Available	NA																								Not Available	NA
TCGA-AA-3851	1006	Alive	T3	N0	M0	Stage IIA	NA			74	Ascending Colon	TCGA-AA-3851	1add38c2-df6f-47c9-9373-0bec0e40baf8	NO	Not Available	Not Available	Not Available	18	-27090	Not Applicable	0	0	Not Available	NA																								Not Available	NA
TCGA-AA-3930	61	Dead	T3	N2	M1	Stage IV	NA			66	Ascending Colon	TCGA-AA-3930	81f6b141-2195-4091-9cd3-dfb022663949	NO	Not Available	Not Available	Not Available	18	-24321	Not Applicable	0	0	Not Available	NA	TCGA-AA-3930-D37377	7BFAB3A6-37A3-4A3A-9D2D-FF9B6CAE4884	Not Available	3	31	Not Available	Capecitabine	Clinical Progressive Disease	12	Not Available	Not Available	Not Available	Not Available	Not Applicable	Not Available	Not Available	NO	Chemotherapy	Not Available	Not Available	Not Available	NO	2012	Not Available	NA
TCGA-AA-3556	700	Alive	T2	N0	M0	Stage I	NA			78	Sigmoid Colon	TCGA-AA-3556	fd16b634-2e04-44a3-862d-fb03cd73c057	NO	Not Available	Not Available	Not Available	18	-28704	Not Applicable	0	0	Not Available	NA																								Not Available	NA
TCGA-AA-3548	1034	Alive	T3	N2	M0	Stage IIIC	NA			71	Cecum	TCGA-AA-3548	2dced66c-1f0d-4039-a5e5-54cca77c16e9	NO	Not Available	Not Available	Not Available	18	-26175	Not Applicable	0	0	Not Available	NA	TCGA-AA-3548-D37456;TCGA-AA-3548-D37457;TCGA-AA-3548-D37458	93B49DE9-A03F-4B39-B6E3-8BD4788D0490;F7F32AFA-44B0-4A6A-9750-E45777A0FCE0;E07A2591-6A1E-4F73-A3D3-516AC60E8D80	Not Available;Not Available;Not Available	3;3;3	304;304;304	31;31;31	Folinic acid;5-Fluorouracil;Irinotecan	Complete Response;Complete Response;Complete Response	12;12;12	Not Available;Not Available;Not Available	Not Available;Not Available;Not Available	Not Available;Not Available;Not Available	Not Available;Not Available;Not Available	Not Applicable;Not Applicable;Not Applicable	Not Available;Not Available;Not Available	Not Available;Not Available;Not Available	NO;NO;NO	Chemotherapy;Chemotherapy;Chemotherapy	Not Available;Not Available;Not Available	Not Available;Not Available;Not Available	Not Available;Not Available;Not Available	NO;NO;NO	2012;2012;2012	Not Available	NA
TCGA-AA-A017	457	Alive	T3	N0	M0	Stage IIA	NA			57	Sigmoid Colon	TCGA-AA-A017	af06cde0-c69a-4bb1-a234-8023b95e4835	NO	Not Available	Not Available	Not Available	15	-21032	Not Applicable	0	31	Not Available	NA																								Not Available	NA
TCGA-AA-A00K	549	Alive	T3	N0	M0	Stage IIA	NA			79	Sigmoid Colon	TCGA-AA-A00K	0cbe9848-8eac-4ea8-a36b-fb74b4a33de7	NO	Not Available	Not Available	Not Available	15	-29189	Not Applicable	0	31	Not Available	NA																								Not Available	NA
TCGA-AA-3549	639	Alive	T2	N0	M0	Stage I	NA			69	Cecum	TCGA-AA-3549	e6ec5a68-7555-4f26-bd7e-9cdb4c5f7004	NO	Not Available	Not Available	Not Available	18	-25415	Not Applicable	0	0	Not Available	NA																								Not Available	NA
TCGA-AA-3815	1005	Alive	T3	N0	M0	Stage IIA	NA			65	Cecum	TCGA-AA-3815	b16bb717-d1cf-4237-a554-43f3995b82f2	NO	Not Available	Not Available	Not Available	18	-23922	Not Applicable	0	0	Not Available	NA																								Not Available	NA
TCGA-AA-3860	945	Alive	T3	N1	M0	Stage IIIB	NA			53	Sigmoid Colon	TCGA-AA-3860	ac6a3df9-41b1-4e5a-a15e-f44481384c23	NO	Not Available	Not Available	Not Available	18	-19449	Not Applicable	0	0	Not Available	NA	TCGA-AA-3860-D37483;TCGA-AA-3860-D37484;TCGA-AA-3860-D37485	A46935F0-B18B-4309-974A-98F5C9843423;66C6E947-FA93-4F75-B11C-3B9D3AB625D9;572E00AF-360A-426A-8377-D9A247751050	Not Available;Not Available;Not Available	3;3;3	184;184;184	31;31;31	Folinic acid;5-Fluorouracil;Oxaliplatin	Complete Response;Complete Response;Complete Response	12;12;12	Not Available;Not Available;Not Available	Not Available;Not Available;Not Available	Not Available;Not Available;Not Available	Not Available;Not Available;Not Available	Not Applicable;Not Applicable;Not Applicable	Not Available;Not Available;Not Available	Not Available;Not Available;Not Available	NO;NO;NO	Chemotherapy;Chemotherapy;Chemotherapy	Not Available;Not Available;Not Available	Not Available;Not Available;Not Available	Not Available;Not Available;Not Available	NO;NO;NO	2012;2012;2012	Not Available	NA
TCGA-AA-3837	1186	Alive	T3	N0	M0	Stage IIA	NA			67	Hepatic Flexure	TCGA-AA-3837	0f940ec0-eb0b-422a-a764-a26c8e5c216d	NO	Not Available	Not Available	Not Available	18	-24655	Not Applicable	0	31	Not Available	NA																								Not Available	NA
TCGA-AA-A029	1581	Alive	T3	N0	M0	Stage II	NA			67	Cecum	TCGA-AA-A029	93ca8937-97c0-4f6e-bdec-66d32f2a7b3d	NO	Not Available	Not Available	Not Available	15	-24686	Not Applicable	0	120	Not Available	NA																								Not Available	NA
TCGA-AA-A02K	426	Dead	T4	N2	M1	Stage IV	NA			50	Ascending Colon	TCGA-AA-A02K	10881458-55b2-41d1-8358-4ee6ccb8ec85	NO	Not Available	Not Available	Not Available	15	-18506	Not Applicable	0	0	Not Available	NA	TCGA-AA-A02K-D37383;TCGA-AA-A02K-D37384;TCGA-AA-A02K-D37385;TCGA-AA-A02K-D37386	284D9612-89A5-4F4D-82AD-D73C214BF630;DA114F4F-D777-4640-A175-AC51FF4D0346;B72BBC44-9B88-4103-84CC-157C43ADFAE9;AD48478E-2CDC-4B13-B6E6-61CAE4FEE9E9	Not Available;Not Available;Not Available;Not Available	3;3;3;3	275;275;275;275	31;31;31;31	Folinic acid;5-Fluorouracil;Irinotecan;Bevacizumab	Clinical Progressive Disease;Clinical Progressive Disease;Clinical Progressive Disease;Clinical Progressive Disease	12;12;12;12	Not Available;Not Available;Not Available;Not Available	Not Available;Not Available;Not Available;Not Available	Not Available;Not Available;Not Available;Not Available	Not Available;Not Available;Not Available;Not Available	Not Applicable;Not Applicable;Not Applicable;Not Applicable	Not Available;Not Available;Not Available;Not Available	Not Available;Not Available;Not Available;Not Available	NO;NO;NO;NO	Chemotherapy;Chemotherapy;Chemotherapy;Targeted Molecular therapy	Not Available;Not Available;Not Available;Not Available	Not Available;Not Available;Not Available;Not Available	Not Available;Not Available;Not Available;Not Available	NO;NO;NO;NO	2012;2012;2012;2012	Not Available	NA
TCGA-AA-3811	306	Dead	T3	N2	M0	Stage III	NA			84	Hepatic Flexure	TCGA-AA-3811	d7ebd11a-1339-4b28-be90-a788d2cfa706	NO	Not Available	Not Available	Not Available	18	-30893	Not Applicable	0	30	Not Available	NA																								Not Available	NA
TCGA-AA-3518	31	Alive	T3	N0	M0	Stage IIA	NA			81	Cecum	TCGA-AA-3518	c5c4a0a5-900d-483d-9282-475654d63265	NO	Not Available	Not Available	Not Available	18	-29769	Not Applicable	0	31	Not Available	NA																								Not Available	NA
TCGA-AA-3542	395	Alive	T3	N2	M0	Stage IIIC	NA			69	Sigmoid Colon	TCGA-AA-3542	9dcb4e16-b582-4cd0-87cf-04f480ec2cec	NO	Not Available	Not Available	Not Available	18	-25324	Not Applicable	0	0	Not Available	NA	TCGA-AA-3542-D37453;TCGA-AA-3542-D37454;TCGA-AA-3542-D37455	977CAA41-165B-4CFC-966E-54A9B8400418;C5B20829-CD88-4658-A64D-378175527DD5;FA7BF379-E96D-4367-95B2-B00912AE20E1	Not Available;Not Available;Not Available	3;3;3	214;214;214	30;30;30	Folinic acid;5-Fluorouracil;Oxaliplatin	Complete Response;Complete Response;Complete Response	12;12;12	Not Available;Not Available;Not Available	Not Available;Not Available;Not Available	Not Available;Not Available;Not Available	Not Available;Not Available;Not Available	Not Applicable;Not Applicable;Not Applicable	Not Available;Not Available;Not Available	Not Available;Not Available;Not Available	NO;NO;NO	Chemotherapy;Chemotherapy;Chemotherapy	Not Available;Not Available;Not Available	Not Available;Not Available;Not Available	Not Available;Not Available;Not Available	NO;NO;NO	2012;2012;2012	Not Available	NA
TCGA-AA-3553	730	Alive	T2	N0	M0	Stage I	NA			61	Sigmoid Colon	TCGA-AA-3553	d181c72b-843c-4b2d-b014-2a6dd1c3c1ec	NO	Not Available	Not Available	Not Available	18	-22524	Not Applicable	0	0	Not Available	NA																								Not Available	NA
TCGA-A6-2677	740	Dead	T3	N2	M0	Stage IIIC	NA	FPPP	TCGA	68	Cecum	TCGA-A6-2677	d976782c-90c1-421d-b83c-7fc2617e2709	NO	Not Available	Not Available	NO	21	-25143	Not Applicable	0	541	Not Available	NA	TCGA-A6-2677-D2516;TCGA-A6-2677-D2514;TCGA-A6-2677-D2518;TCGA-A6-2677-D2510	8bcbb764-ba22-4dca-98cb-b56141536845;fc790e21-4b95-4088-b256-6f1f47d9e46f;f63c40b8-a6dc-4a65-b2ed-e7b458fd120a;07c7b730-6602-4b6b-bb72-99d5b986f227	Not Available;Not Available;Not Available;Not Available	21;21;21;21	617;617;252;252	112;112;112;112	Leucovorin;5- FU;5-FU;Oxaliplatin	Not Available;Not Available;Not Available;Not Available	10;10;10;10	9;9;9;9	600;592-620;3552-3720;66-150	mg;mg;mg;mg	ADJUVANT;ADJUVANT;ADJUVANT;ADJUVANT	Not Applicable;Not Applicable;Not Applicable;Not Applicable	1;1;1;1	IV;IV;IV;IV	NO;NO;NO;NO	Other, specify in notes;Chemotherapy;Chemotherapy;Chemotherapy	Ancillary;Not Available;Not Available;Not Available	5400;5504;33,024;976	mg;mg;mg;mg	Not Available;Not Available;Not Available;Not Available	2010;2010;2010;2010	NOT HISPANIC OR LATINO	NA
TCGA-AA-3955	638	Alive	T2	N2a	M0	Stage IIIB	NA			38	Descending Colon	TCGA-AA-3955	5c24435e-8e50-42c2-80c7-919b1cad0133	NO	Not Available	Not Available	Not Available	18	-14186	Not Applicable	0	0	Not Available	NA	TCGA-AA-3955-D37378;TCGA-AA-3955-D37379	923A811E-F19F-43E7-84A9-1C1FBA0ABD65;CDACF96B-2A58-4F42-8195-990F0E68F7C0	Not Available;Not Available	3;3	181;150	28;28	Capecitabine;Oxaliplatin	Complete Response;Complete Response	12;12	Not Available;Not Available	Not Available;Not Available	Not Available;Not Available	Not Available;Not Available	Not Applicable;Not Applicable	Not Available;Not Available	Not Available;Not Available	NO;NO	Chemotherapy;Chemotherapy	Not Available;Not Available	Not Available;Not Available	Not Available;Not Available	NO;NO	2012;2012	Not Available	NA
TCGA-AA-3952	61	Dead	T3	N2	M0	Stage IIIC	NA			68	Descending Colon	TCGA-AA-3952	c1e141af-bdd1-4176-8c0e-cf1ab0c1d9d3	NO	Not Available	Not Available	Not Available	18	-24868	61	0	Not Available	Not Available	NA																								Not Available	NA
TCGA-AA-3821	31	Alive	T2	N0	M0	Stage I	NA			81	Hepatic Flexure	TCGA-AA-3821	0e87e5fd-d5bb-4c0d-952d-711a6abbf336	NO	Not Available	Not Available	Not Available	18	-29706	Not Applicable	0	0	Not Available	NA																								Not Available	NA
TCGA-AA-A00Z	669	Alive	T3	N0	M0	Stage IIA	NA			70	Sigmoid Colon	TCGA-AA-A00Z	af3a0634-4292-45bd-b948-6b6bd2d58090	NO	Not Available	Not Available	Not Available	15	-25872	Not Applicable	0	31	Not Available	NA																								Not Available	NA
TCGA-AA-A00D	578	Alive	T2	N0	M0	Stage I	NA			70	Ascending Colon	TCGA-AA-A00D	081a3dc7-45e1-457d-add0-c4686140a8d0	NO	Not Available	Not Available	Not Available	15	-25689	Not Applicable	0	31	Not Available	NA																								Not Available	NA
TCGA-AA-A00A	1157	Alive	T3	N0	M0	Stage IIA	NA			80	Ascending Colon	TCGA-AA-A00A	10628a61-bd5e-4415-af97-631c5ca320cb	NO	Not Available	Not Available	Not Available	15	-29463	Not Applicable	0	0	Not Available	NA																								Not Available	NA
TCGA-A6-2676	1305	Dead	T4	N0	M0	Stage IIB	NA			75	Cecum	TCGA-A6-2676	89a6384e-1cea-440b-9f17-d57cb0805174	NO	Not Available	Not Available	NO	25	-27403	Not Applicable	0	447	Not Available	NA	TCGA-A6-2676-D2539;TCGA-A6-2676-D2541;TCGA-A6-2676-D2538;TCGA-A6-2676-D2540	716560b1-bfca-4513-9253-66e8ce01bffa;108e080e-0872-4a94-9b2a-b8990dc5b718;6c3085ac-6d53-49fe-a8c0-4585b9ae2945;5b1553bb-4c01-431e-b6c3-32fd8f32636b	Not Available;Not Available;Not Available;Not Available	25;25;25;25	111;113;111;111	76;76;76;76	5- FU;5-FU;Oxaliplatin;Leucovorin	Not Available;Not Available;Not Available;Not Available	10;10;10;10	3;3;3;3	461-576;2765-3456;116-122;550-600	mg;mg;mg;mg	ADJUVANT;ADJUVANT;ADJUVANT;ADJUVANT	Not Applicable;Not Applicable;Not Applicable;Not Applicable	1;1;1;1	IV;IV;IV;IV	NO;NO;NO;NO	Chemotherapy;Chemotherapy;Chemotherapy;Other, specify in notes	Not Available;Not Available;Not Available;Ancillary	1581;9485;360;1750	mg;mg;mg;mg	Not Available;Not Available;Not Available;Not Available	2010;2010;2010;2010	NOT HISPANIC OR LATINO	NA
TCGA-AA-3819	761	Alive	T3	N0	M0	Stage IIA	NA			41	Sigmoid Colon	TCGA-AA-3819	192da41f-f0a5-494e-8eb9-96bcdae56ff8	NO	Not Available	Not Available	Not Available	18	-15280	Not Applicable	0	0	Not Available	NA																								Not Available	NA
TCGA-AA-3519	276	Alive	T3	N1	M0	Stage III	NA			63	Sigmoid Colon	TCGA-AA-3519	09942e9f-c178-44bc-9cd9-f5bfa350b23f	NO	Not Available	Not Available	Not Available	18	-23131	Not Applicable	0	0	Not Available	NA																								Not Available	NA
TCGA-AA-3939	395	Alive	T3	N0	M0	Stage IIA	NA			83	Ascending Colon	TCGA-AA-3939	81555ac5-9cc2-49ae-9033-657f56243f20	NO	Not Available	Not Available	Not Available	18	-30439	Not Applicable	0	30	Not Available	NA																								Not Available	NA
TCGA-AA-A02W	1247	Alive	T2	N0	M0	Stage I	NA			73	Sigmoid Colon	TCGA-AA-A02W	73448b56-a6c6-4c98-a153-ab704261e073	NO	Not Available	Not Available	Not Available	15	-26693	Not Applicable	0	31	Not Available	NA																								Not Available	NA
TCGA-AA-A03F	0	Alive	T3	N2	M0	Stage III	NA			90	Cecum	TCGA-AA-A03F	2a971e32-b0e7-4a3f-8c40-62d69c0307d8	NO	Not Available	Not Available	Not Available	15	-32873	Not Applicable	0	0	Not Available	NA																								Not Available	NA
TCGA-AA-A01D	334	Dead	T3	N2	M0	Stage IIIC	NA			47	Sigmoid Colon	TCGA-AA-A01D	e2edbf3f-25d8-49aa-b656-2a59c3b99aeb	NO	Not Available	Not Available	Not Available	15	-17318	Not Applicable	0	30	Not Available	NA	TCGA-AA-A01D-D37404;TCGA-AA-A01D-D37405;TCGA-AA-A01D-D37406;TCGA-AA-A01D-D37407;TCGA-AA-A01D-D37408;TCGA-AA-A01D-D37409	4F739C3B-57E6-4AB5-8F2A-79326FE773E6;C597CB1C-8B1F-4EAE-AACF-2ACB2C0B0267;9E59767B-446A-4F48-BFEF-20BDB4731B47;F2A4FAE7-D172-454F-8F86-44237D0514DF;2F4FDF3B-F5D5-4507-975B-07A38AC4D75C;45839A4B-3333-43FE-ABE2-E6FCFE5D837D	Not Available;Not Available;Not Available;Not Available;Not Available;Not Available	3;3;3;3;3;3	273;153;273;304;273;304	61;61;214;273;214;273	Capecitabine;Oxaliplatin;Irinotecan;Mitomycin;Bevacizumab;Panitumumab	Clinical Progressive Disease;Clinical Progressive Disease;Clinical Progressive Disease;Clinical Progressive Disease;Clinical Progressive Disease;Clinical Progressive Disease	12;12;12;12;12;12	Not Available;Not Available;Not Available;Not Available;Not Available;Not Available	Not Available;Not Available;Not Available;Not Available;Not Available;Not Available	Not Available;Not Available;Not Available;Not Available;Not Available;Not Available	Not Available;Not Available;Not Available;Not Available;Not Available;Not Available	Not Applicable;Not Applicable;Not Applicable;Not Applicable;Not Applicable;Not Applicable	Not Available;Not Available;Not Available;Not Available;Not Available;Not Available	Not Available;Not Available;Not Available;Not Available;Not Available;Not Available	NO;NO;NO;YES;NO;NO	Chemotherapy;Chemotherapy;Chemotherapy;Chemotherapy;Targeted Molecular therapy;Targeted Molecular therapy	Not Available;Not Available;Not Available;Not Available;Not Available;Not Available	Not Available;Not Available;Not Available;Not Available;Not Available;Not Available	Not Available;Not Available;Not Available;Not Available;Not Available;Not Available	NO;NO;NO;NO;NO;NO	2012;2012;2012;2012;2012;2012	Not Available	NA
TCGA-AA-A01T	1005	Alive	T3	N1	M0	Stage III	NA			63	Sigmoid Colon	TCGA-AA-A01T	f87c6dcc-1a9e-4df5-962c-1f946e2611f8	NO	Not Available	Not Available	Not Available	15	-23192	Not Applicable	0	31	Not Available	NA	TCGA-AA-A01T-D37392;TCGA-AA-A01T-D37393	45AADB1F-5899-4657-BE24-711FD3CEFC2C;70E04694-EC9B-4596-B5C3-25BC492B1919	Not Available;Not Available	3;3	184;184	61;61	5-Fluorouracil;Folinic acid	Complete Response;Complete Response	12;12	Not Available;Not Available	Not Available;Not Available	Not Available;Not Available	Not Available;Not Available	Not Applicable;Not Applicable	Not Available;Not Available	Not Available;Not Available	NO;NO	Chemotherapy;Chemotherapy	Not Available;Not Available	Not Available;Not Available	Not Available;Not Available	NO;NO	2012;2012	Not Available	NA
TCGA-AA-3521	NA		T3	N0	M0	Stage II	NA			87	Sigmoid Colon	TCGA-AA-3521	ad440651-a2de-4bb1-90da-1e5e8975ab59	NO	Not Available	Not Available	Not Available	18	-31805	Not Applicable	0	Discrepancy	Not Available	NA																								Not Available	NA
TCGA-AA-3976	791	Alive	T2	N1	M0	Stage IIIA	NA			70	Sigmoid Colon	TCGA-AA-3976	14efca0c-882d-4fba-b15c-64af6e213b80	NO	Not Available	Not Available	Not Available	18	-25599	Not Applicable	0	0	Not Available	NA	TCGA-AA-3976-D37436;TCGA-AA-3976-D37437;TCGA-AA-3976-D37438	71E44A11-E322-4B4A-9E01-EAA0DA75FD43;899F6FBF-C49A-43F7-9946-8B8993D26711;22945031-905D-47E4-814D-EB4815FCF8B5	Not Available;Not Available;Not Available	3;3;3	242;242;61	30;30;30	Folinic acid;5-Fluorouracil;Oxaliplatin	Complete Response;Complete Response;Complete Response	12;12;12	Not Available;Not Available;Not Available	Not Available;Not Available;Not Available	Not Available;Not Available;Not Available	Not Available;Not Available;Not Available	Not Applicable;Not Applicable;Not Applicable	Not Available;Not Available;Not Available	Not Available;Not Available;Not Available	NO;NO;NO	Chemotherapy;Chemotherapy;Chemotherapy	Not Available;Not Available;Not Available	Not Available;Not Available;Not Available	Not Available;Not Available;Not Available	NO;NO;NO	2012;2012;2012	Not Available	NA
TCGA-AA-3532	882	Alive	T3	N0	M0	Stage IIA	NA			63	Sigmoid Colon	TCGA-AA-3532	aa85d9e8-caa6-422c-95ce-780e4ac2a5e4	NO	Not Available	Not Available	Not Available	18	-23133	Not Applicable	0	0	Not Available	NA																								Not Available	NA
TCGA-AA-3529	0	Dead	T3	N2	M0	Stage IIIC	NA			78	Sigmoid Colon	TCGA-AA-3529	bfb07784-693b-4c25-874e-4ad6e04a5d46	NO	Not Available	Not Available	Not Available	18	-28609	0	0	Not Available	Not Available	NA																								Not Available	NA
TCGA-AA-A02J	153	Dead	T3	N0	M1	Stage IV	NA			70	Sigmoid Colon	TCGA-AA-A02J	73a142e1-8ac2-4cfe-b8cf-7e9dea64f488	NO	Not Available	Not Available	Not Available	15	-25749	153	0	Not Available	Not Available	NA																								Not Available	NA
TCGA-AA-3524	1096	Alive	T3	N0	M0	Stage II	NA			85	Sigmoid Colon	TCGA-AA-3524	03efbc94-a43d-4db0-9377-e397348430a6	NO	Not Available	Not Available	Not Available	18	-31197	Not Applicable	0	0	Not Available	NA																								Not Available	NA
TCGA-AA-3877	943	Alive	T1	N0	M0	Stage I	NA			83	Transverse Colon	TCGA-AA-3877	043a4745-566b-4106-b159-99cb8b394b81	NO	Not Available	Not Available	Not Available	18	-30377	Not Applicable	0	30	Not Available	NA																								Not Available	NA
TCGA-AA-3522	1127	Alive	T3	N0	M0	Stage IIA	NA			67	Ascending Colon	TCGA-AA-3522	d7ba64d7-b4e5-488d-9f28-bcb7bf3c0f35	NO	Not Available	Not Available	Not Available	18	-24653	Not Applicable	0	0	Not Available	NA																								Not Available	NA
TCGA-AA-3844	454	Alive	T3	N2	M0	Stage IIIC	NA			78	Sigmoid Colon	TCGA-AA-3844	4f786107-3cf5-4ab3-bba4-f399dee23f0e	NO	Not Available	Not Available	Not Available	18	-28521	Not Applicable	0	28	Not Available	NA	TCGA-AA-3844-D37478;TCGA-AA-3844-D37479;TCGA-AA-3844-D37480;TCGA-AA-3844-D37481;TCGA-AA-3844-D37482	44AB9D89-3E3C-461B-ADFD-22214943A595;E2943FD1-7025-4ADC-A4C1-E1DA1ABA85AF;69922414-9463-4B03-9D7F-D4E028CF5C63;0984FEF0-6099-46AD-9223-E34AFE4BC94C;BAC19AFA-78D6-45CA-B1DB-BC08D71E505E	Not Available;Not Available;Not Available;Not Available;Not Available	3;3;3;3;3	59;424;424;424;393	59;393;393;393;393	Capecitabine;Folinic acid;5-Fluorouracil;Oxaliplatin;Bevacizumab	Clinical Progressive Disease;Clinical Progressive Disease;Clinical Progressive Disease;Clinical Progressive Disease;Clinical Progressive Disease	12;12;12;12;12	Not Available;Not Available;Not Available;Not Available;Not Available	Not Available;Not Available;Not Available;Not Available;Not Available	Not Available;Not Available;Not Available;Not Available;Not Available	Not Available;Not Available;Not Available;Not Available;Not Available	Not Applicable;Not Applicable;Not Applicable;Not Applicable;Not Applicable	Not Available;Not Available;Not Available;Not Available;Not Available	Not Available;Not Available;Not Available;Not Available;Not Available	NO;NO;NO;NO;NO	Chemotherapy;Chemotherapy;Chemotherapy;Chemotherapy;Targeted Molecular therapy	Not Available;Not Available;Not Available;Not Available;Not Available	Not Available;Not Available;Not Available;Not Available;Not Available	Not Available;Not Available;Not Available;Not Available;Not Available	NO;NO;NO;NO;NO	2012;2012;2012;2012;2012	Not Available	NA
TCGA-AA-3982	822	Alive	T3	N1	M0	Stage IIIB	NA			75	Sigmoid Colon	TCGA-AA-3982	5a195baa-2d05-4273-a7c4-64cc816b0406	NO	Not Available	Not Available	Not Available	18	-27608	Not Applicable	0	0	Not Available	NA																								Not Available	NA
TCGA-AA-A01K	943	Alive	T3	N2	M0	Stage IIIC	NA			74	Sigmoid Colon	TCGA-AA-A01K	a72dd578-3a6f-4807-a843-4a942500944e	NO	Not Available	Not Available	Not Available	15	-27029	Not Applicable	0	31	Not Available	NA	TCGA-AA-A01K-D37397;TCGA-AA-A01K-D37398;TCGA-AA-A01K-D37399	3A2C3BC3-3631-4F1C-BB13-DAC6A294936E;6796D8BC-15FF-4367-ADF9-C70A1F2D542B;4BEE62E4-B052-4D7B-B1AE-7020CE37EC3F	Not Available;Not Available;Not Available	3;3;3	243;243;243	61;61;61	Folinic acid;5-Fluorouracil;Oxaliplatin	Complete Response;Complete Response;Complete Response	12;12;12	Not Available;Not Available;Not Available	Not Available;Not Available;Not Available	Not Available;Not Available;Not Available	Not Available;Not Available;Not Available	Not Applicable;Not Applicable;Not Applicable	Not Available;Not Available;Not Available	Not Available;Not Available;Not Available	NO;NO;NO	Chemotherapy;Chemotherapy;Chemotherapy	Not Available;Not Available;Not Available	Not Available;Not Available;Not Available	Not Available;Not Available;Not Available	NO;NO;NO	2012;2012;2012	Not Available	NA
TCGA-AA-3692	1095	Dead	T3	N2	M1	Stage IV	NA			47	Splenic Flexure	TCGA-AA-3692	bce3ce45-4fb3-4d8e-9ec7-d24427c2ba4d	NO	Not Available	Not Available	Not Available	18	-17167	Not Applicable	0	0	Not Available	NA	TCGA-AA-3692-D37486;TCGA-AA-3692-D37487;TCGA-AA-3692-D37488;TCGA-AA-3692-D37489;TCGA-AA-3692-D37490	C5BC9915-EBBF-4648-A0FA-9F09297020A2;781EDB20-2832-4C12-A42B-CA09749FD454;CFE1096A-3879-429A-8A98-B8F0C2BBD23B;FDE51FAB-DA6B-4B36-A1E9-31903F8BBFDA;086DF84A-9DAF-4E7C-8F35-043714901C01	Not Available;Not Available;Not Available;Not Available;Not Available	3;3;3;3;3	669;669;883;669;883	31;31;31;31;883	Folinic acid;5-Fluorouracil;Irinotecan;Bevacizumab;Cetuximab	Clinical Progressive Disease;Clinical Progressive Disease;Clinical Progressive Disease;Clinical Progressive Disease;Clinical Progressive Disease	12;12;12;12;12	Not Available;Not Available;Not Available;Not Available;Not Available	Not Available;Not Available;Not Available;Not Available;Not Available	Not Available;Not Available;Not Available;Not Available;Not Available	Not Available;Not Available;Not Available;Not Available;Not Available	Not Applicable;Not Applicable;Not Applicable;Not Applicable;Not Applicable	Not Available;Not Available;Not Available;Not Available;Not Available	Not Available;Not Available;Not Available;Not Available;Not Available	NO;NO;NO;NO;NO	Chemotherapy;Chemotherapy;Chemotherapy;Targeted Molecular therapy;Targeted Molecular therapy	Not Available;Not Available;Not Available;Not Available;Not Available	Not Available;Not Available;Not Available;Not Available;Not Available	Not Available;Not Available;Not Available;Not Available;Not Available	NO;NO;NO;NO;NO	2012;2012;2012;2012;2012	Not Available	NA
TCGA-AA-3866	518	Alive	T2	N0	M0	Stage I	NA			78	Cecum	TCGA-AA-3866	02f9668c-71e6-485f-88b1-b37dc8bdd2ab	NO	Not Available	Not Available	Not Available	18	-28672	Not Applicable	0	0	Not Available	NA																								Not Available	NA
TCGA-AA-A01S	31	Alive	T3	N1	M0	Stage III	NA			47	Sigmoid Colon	TCGA-AA-A01S	84e34cf2-b3bb-4a1a-8fb7-6c2c604c4008	NO	Not Available	Not Available	Not Available	15	-17257	Not Applicable	0	31	Not Available	NA																								Not Available	NA
TCGA-AA-A01C	457	Alive	T2	N1	M0	Stage IIIA	NA			75	Ascending Colon	TCGA-AA-A01C	80809d79-92e1-4d6c-ba2e-0a9589997792	NO	Not Available	Not Available	Not Available	15	-27729	Not Applicable	0	30	Not Available	NA																								Not Available	NA
TCGA-AA-A00R	30	Alive	T2	N0	M0	Stage I	NA			64	Cecum	TCGA-AA-A00R	ca22edd4-eb7c-4677-84aa-6f0354459a19	NO	Not Available	Not Available	Not Available	15	-23528	Not Applicable	0	30	Not Available	NA																								Not Available	NA
TCGA-AA-3526	580	Alive	T2	N0	M0	Stage I	NA			57	Sigmoid Colon	TCGA-AA-3526	88e64f45-adc4-4223-9838-4d7d45b8f0c0	NO	Not Available	Not Available	Not Available	18	-21123	Not Applicable	0	30	Not Available	NA																								Not Available	NA
TCGA-AA-A00E	913	Alive	T3	N0	M0	Stage IIA	NA			65	Ascending Colon	TCGA-AA-A00E	124b6856-f581-46da-9068-b0a49b999785	NO	Not Available	Not Available	Not Available	15	-23741	Not Applicable	0	0	Not Available	NA																								Not Available	NA
TCGA-AA-3848	306	Dead	T3	N2	M0	Stage IIIC	NA			82	Sigmoid Colon	TCGA-AA-3848	0a815133-0edd-4422-89f2-2f067b6f2156	NO	Not Available	Not Available	Not Available	18	-30194	Not Applicable	0	30	Not Available	NA																								Not Available	NA
TCGA-A6-3810	1111	Alive	T3	N0	M0	Stage IIA	NA	FPPP	TCGA	62	Sigmoid Colon	TCGA-A6-3810	b728e6e8-a0e4-496b-904c-6f07c12e901f	NO	Not Available	Not Available	NO	19	-22999	Not Applicable	0	247	Not Available	NA																								NOT HISPANIC OR LATINO	NA
TCGA-AA-3555	911	Alive	T3	N0	M0	Stage IIA	NA			81	Hepatic Flexure	TCGA-AA-3555	36eaf209-c332-4321-b6aa-51a3368ecd79	NO	Not Available	Not Available	Not Available	18	-29617	Not Applicable	0	30	Not Available	NA																								Not Available	NA
TCGA-AA-3979	730	Alive	T3	N0	M0	Stage IIA	NA			84	Sigmoid Colon	TCGA-AA-3979	af17788e-a562-43aa-bd36-fd3e031f483c	NO	Not Available	Not Available	Not Available	18	-30742	Not Applicable	0	0	Not Available	NA																								Not Available	NA
TCGA-AA-3949	791	Alive	T3	N1	M0	Stage IIIB	NA			87	Ascending Colon	TCGA-AA-3949	cbdabbcd-d8f1-4d7c-9e18-ebd83d888c51	NO	Not Available	Not Available	Not Available	18	-32081	Not Applicable	0	30	Not Available	NA																								Not Available	NA
TCGA-AA-A03J	1246	Alive	T2	N0	M0	Stage I	NA			65	Sigmoid Colon	TCGA-AA-A03J	e6c8c5fc-158a-4de4-b3f6-3b645584bbc7	NO	Not Available	Not Available	Not Available	15	-23986	Not Applicable	0	0	Not Available	NA																								Not Available	NA
TCGA-AA-3980	242	Alive	T2	N0	M0	Stage I	NA			89	Sigmoid Colon	TCGA-AA-3980	384400c1-98d6-4cc3-8724-de6711f6208b	NO	Not Available	Not Available	Not Available	18	-32630	Not Applicable	0	0	Not Available	NA																								Not Available	NA
TCGA-AA-3516	396	Dead	T3	N2	M0	Stage III	NA			74	Ascending Colon	TCGA-AA-3516	d9d7f0d4-fa64-48f2-8037-52cbf0b34ad8	NO	Not Available	Not Available	Not Available	18	-27303	Not Applicable	0	0	Not Available	NA																								Not Available	NA
TCGA-AA-3680	335	Dead	T4	N2	M1	Stage IV	NA			67	Cecum	TCGA-AA-3680	f3b9defb-88ed-4c95-9feb-7197d869676c	NO	Not Available	Not Available	Not Available	18	-24655	Not Applicable	0	0	Not Available	NA	TCGA-AA-3680-D37466;TCGA-AA-3680-D37467;TCGA-AA-3680-D37468	CC56A6EE-BBEF-44F2-876A-0AB791B6F9B1;60CA88E0-83DA-4B36-BE1D-F18C24A1D8E7;AE2B4E60-C99E-48F0-8B68-5A121C279908	Not Available;Not Available;Not Available	3;3;3	90;90;90	31;31;31	Folinic acid;5-Fluorouracil;Oxaliplatin	Clinical Progressive Disease;Clinical Progressive Disease;Clinical Progressive Disease	12;12;12	Not Available;Not Available;Not Available	Not Available;Not Available;Not Available	Not Available;Not Available;Not Available	Not Available;Not Available;Not Available	Not Applicable;Not Applicable;Not Applicable	Not Available;Not Available;Not Available	Not Available;Not Available;Not Available	NO;NO;NO	Chemotherapy;Chemotherapy;Chemotherapy	Not Available;Not Available;Not Available	Not Available;Not Available;Not Available	Not Available;Not Available;Not Available	NO;NO;NO	2012;2012;2012	Not Available	NA
TCGA-AA-3845	0	Dead	T3	N0	M0	Stage IIA	NA			86	Ascending Colon	TCGA-AA-3845	bc02f801-081b-489b-87cb-d275c70299d5	NO	Not Available	Not Available	Not Available	18	-31593	0	0	Not Available	Not Available	NA																								Not Available	NA
TCGA-AA-A01P	1158	Dead	T3	N1	M0	Stage III	NA			80	Ascending Colon	TCGA-AA-A01P	13ae9d83-a22f-451f-88bb-686051725cf3	NO	Not Available	Not Available	Not Available	15	-29554	Not Applicable	0	0	Not Available	NA																								Not Available	NA
TCGA-AA-3869	822	Dead	T4	N2	M1	Stage IV	NA			76	Cecum	TCGA-AA-3869	39d3b5b3-d51e-4d77-a8aa-2977fa734fab	NO	Not Available	Not Available	Not Available	18	-28062	Not Applicable	0	0	Not Available	NA	TCGA-AA-3869-D37491;TCGA-AA-3869-D37492;TCGA-AA-3869-D37493;TCGA-AA-3869-D37494;TCGA-AA-3869-D37495;TCGA-AA-3869-D37496	DA64549C-BBD5-4E27-B064-182E142FC782;ECAD1937-2E65-4E73-959F-DF8DA17FBAD6;7BB5F82C-B67C-4405-840E-B5EB1385A49D;70A670E1-B68A-4FDE-804F-E54569FE7655;689C50C2-8AC3-4B58-BA25-84BE69AE99F1;634D660B-99EA-421D-A10D-A9B924C6AB3B	Not Available;Not Available;Not Available;Not Available;Not Available;Not Available	3;3;3;3;3;3	365;396;761;761;580;761	92;365;365;365;365;608	Capecitabine;Folinic acid;5-Fluorouracil;Irinotecan;Bevacizumab;Cetuximab	Partial Response;Partial Response;Partial Response;Partial Response;Partial Response;Partial Response	12;12;12;12;12;12	Not Available;Not Available;Not Available;Not Available;Not Available;Not Available	Not Available;Not Available;Not Available;Not Available;Not Available;Not Available	Not Available;Not Available;Not Available;Not Available;Not Available;Not Available	Not Available;Not Available;Not Available;Not Available;Not Available;Not Available	Not Applicable;Not Applicable;Not Applicable;Not Applicable;Not Applicable;Not Applicable	Not Available;Not Available;Not Available;Not Available;Not Available;Not Available	Not Available;Not Available;Not Available;Not Available;Not Available;Not Available	NO;NO;NO;NO;NO;NO	Chemotherapy;Chemotherapy;Chemotherapy;Chemotherapy;Targeted Molecular therapy;Targeted Molecular therapy	Not Available;Not Available;Not Available;Not Available;Not Available;Not Available	Not Available;Not Available;Not Available;Not Available;Not Available;Not Available	Not Available;Not Available;Not Available;Not Available;Not Available;Not Available	NO;NO;NO;NO;NO;NO	2012;2012;2012;2012;2012;2012	Not Available	NA
TCGA-AA-3831	547	Alive	T3	N0	M0	Stage IIA	NA			66	Sigmoid Colon	TCGA-AA-3831	bce5579c-08c6-48e9-853e-fac85ba8cbea	NO	Not Available	Not Available	Not Available	18	-24411	Not Applicable	0	0	Not Available	NA																								Not Available	NA
TCGA-AA-A00W	456	Alive	T1	N0	M0	Stage I	NA			80	Sigmoid Colon	TCGA-AA-A00W	fa96d094-0165-401c-8fd5-6d1ee4ef3994	NO	Not Available	Not Available	Not Available	15	-29311	Not Applicable	0	30	Not Available	NA																								Not Available	NA
TCGA-AA-3527	0	Alive	T3	N0	M0	Stage IIA	NA			90	Cecum	TCGA-AA-3527	269e8ca8-722d-449b-ace1-6545bd72bdd6	NO	Not Available	Not Available	Not Available	18	-32871	Not Applicable	0	0	Not Available	NA																								Not Available	NA
TCGA-AA-A01X	791	Alive	T2	N1	M0	Stage III	NA			80	Sigmoid Colon	TCGA-AA-A01X	2e386e48-b99b-4806-a3e3-081d72a606e7	NO	Not Available	Not Available	Not Available	15	-29281	Not Applicable	0	30	Not Available	NA																								Not Available	NA
TCGA-AA-3531	1035	Alive	T3	N0	M0	Stage IIA	NA			75	Sigmoid Colon	TCGA-AA-3531	401a37f3-6630-4400-a811-a262351e37de	NO	Not Available	Not Available	Not Available	18	-27514	Not Applicable	0	0	Not Available	NA																								Not Available	NA
TCGA-AA-3534	882	Alive	T3	N0	M0	Stage IIA	NA			78	Ascending Colon	TCGA-AA-3534	df228c56-89ac-4122-93b3-6c0740c4ec09	NO	Not Available	Not Available	Not Available	18	-28489	Not Applicable	0	0	Not Available	NA																								Not Available	NA
TCGA-AA-3833	485	Alive	T3	N0	M0	Stage IIA	NA			63	Ascending Colon	TCGA-AA-3833	1a09207e-9184-4f32-bd07-a9f4dc6c825d	NO	Not Available	Not Available	Not Available	18	-23011	Not Applicable	0	0	Not Available	NA																								Not Available	NA
TCGA-AA-3814	0	Alive	T3	N0	M0	Stage IIA	NA			85	Ascending Colon	TCGA-AA-3814	f38d49b7-6cad-4460-abd0-3685a3b2d941	NO	Not Available	Not Available	Not Available	18	-31380	Not Applicable	0	0	Not Available	NA																								Not Available	NA
TCGA-AA-3854	1096	Alive	T2	N0	M0	Stage I	NA			71	Sigmoid Colon	TCGA-AA-3854	7a6c54f1-f4e4-426b-b306-2ca3c4de12ca	NO	Not Available	Not Available	Not Available	18	-26022	Not Applicable	0	31	Not Available	NA																								Not Available	NA
TCGA-AA-3688	578	Alive	T3	N1	M1	Stage IV	NA			80	Sigmoid Colon	TCGA-AA-3688	2c9996bb-af6e-4424-881a-e81b9c9aeb78	NO	Not Available	Not Available	Not Available	18	-29220	Not Applicable	0	0	Not Available	NA																								Not Available	NA
TCGA-AA-A02E	90	Dead	T3	N1	M1	Stage IV	NA			82	Cecum	TCGA-AA-A02E	35620be9-3ba5-4be7-9e00-83103e6a92e6	NO	Not Available	Not Available	Not Available	15	-30256	90	0	Not Available	Not Available	NA																								Not Available	NA
TCGA-AA-3554	546	Alive	T3	N0	M0	Stage IIA	NA			62	Ascending Colon	TCGA-AA-3554	ba49b428-246d-46d2-b549-39a5fc8f7003	NO	Not Available	Not Available	Not Available	18	-22799	Not Applicable	0	0	Not Available	NA																								Not Available	NA
TCGA-AA-3681	182	Alive	T3	N1	M0	Stage III	NA			77	Cecum	TCGA-AA-3681	abb0d53f-f74e-45dc-8fbb-40863016f3c6	NO	Not Available	Not Available	Not Available	18	-28399	Not Applicable	0	0	Not Available	NA																								Not Available	NA
TCGA-AA-3664	1643	Alive	T3	N0	M0	Stage II	NA			74	Cecum	TCGA-AA-3664	a06c09a8-0951-49f4-a765-5147bbcae109	NO	Not Available	Not Available	Not Available	18	-27363	Not Applicable	0	0	Not Available	NA																								Not Available	NA
TCGA-AA-A02F	1216	Alive	T3	N1	M1	Stage IV	NA			68	Sigmoid Colon	TCGA-AA-A02F	dd4be58e-da22-4bcd-bf4c-2b9e60ffda19	NO	Not Available	Not Available	Not Available	15	-25051	Not Applicable	0	31	Not Available	NA	TCGA-AA-A02F-D37387;TCGA-AA-A02F-D37388;TCGA-AA-A02F-D37389;TCGA-AA-A02F-D37390;TCGA-AA-A02F-D37391	F6A5DA6A-5BF9-4460-ACFE-CBA48519AAB4;71DCC297-9D24-453F-A455-1F3541C60CE2;FD42DB4E-C958-48D6-BE29-86FBF6F1B815;FFAE6F6B-0040-4DAB-8FD5-F053839270BC;9C785800-15D7-46C2-95F4-282E60286F9C	Not Available;Not Available;Not Available;Not Available;Not Available	3;3;3;3;3	1127;1127;1127;700;1096	59;59;59;670;59	Folinic acid;5-Fluorouracil;Irinotecan;Oxaliplatin;Bevacizumab	Partial Response;Partial Response;Partial Response;Partial Response;Partial Response	12;12;12;12;12	Not Available;Not Available;Not Available;Not Available;Not Available	Not Available;Not Available;Not Available;Not Available;Not Available	Not Available;Not Available;Not Available;Not Available;Not Available	Not Available;Not Available;Not Available;Not Available;Not Available	Not Applicable;Not Applicable;Not Applicable;Not Applicable;Not Applicable	Not Available;Not Available;Not Available;Not Available;Not Available	Not Available;Not Available;Not Available;Not Available;Not Available	NO;NO;NO;NO;NO	Chemotherapy;Chemotherapy;Chemotherapy;Chemotherapy;Targeted Molecular therapy	Not Available;Not Available;Not Available;Not Available;Not Available	Not Available;Not Available;Not Available;Not Available;Not Available	Not Available;Not Available;Not Available;Not Available;Not Available	NO;NO;NO;NO;NO	2012;2012;2012;2012;2012	Not Available	NA
TCGA-A6-3808	1014	Alive	T3	N0	M0	Stage IIA	NA			73	Cecum	TCGA-A6-3808	4f9775f2-b663-4daf-aa9e-50915cae9407	NO	Not Available	Not Available	NO	11	-26666	Not Applicable	0	279	Not Available	NA																								NOT HISPANIC OR LATINO	NA
TCGA-AA-3517	1186	Alive	T3	N0	M0	Stage IIA	NA			60	Splenic Flexure	TCGA-AA-3517	c4d74653-d26b-4e51-aee0-82ee3d42f883	NO	Not Available	Not Available	Not Available	18	-22099	Not Applicable	0	0	Not Available	NA	TCGA-AA-3517-D37446;TCGA-AA-3517-D37447;TCGA-AA-3517-D37448;TCGA-AA-3517-D37449;TCGA-AA-3517-D37450	4B85C082-B80A-4078-9ACE-04A97F890D2C;F87AD537-F5FE-44DB-8AF5-E6409F211742;F1363524-2B4B-4BEF-AA3A-4C1332C21770;21ACA8B4-7BE6-4C0B-910C-F3B95A355C06;0DADF926-9A5E-4BB7-A9EF-9122111FAC39	Not Available;Not Available;Not Available;Not Available;Not Available	3;3;3;3;3	1065;1155;1127;1065;1127	821;821;821;1004;821	Folinic acid;5-Fluorouracil;Irinotecan;Oxaliplatin;Bevacizumab	Complete Response;Complete Response;Complete Response;Complete Response;Complete Response	12;12;12;12;12	Not Available;Not Available;Not Available;Not Available;Not Available	Not Available;Not Available;Not Available;Not Available;Not Available	Not Available;Not Available;Not Available;Not Available;Not Available	Not Available;Not Available;Not Available;Not Available;Not Available	Not Applicable;Not Applicable;Not Applicable;Not Applicable;Not Applicable	Not Available;Not Available;Not Available;Not Available;Not Available	Not Available;Not Available;Not Available;Not Available;Not Available	NO;NO;NO;NO;NO	Chemotherapy;Chemotherapy;Chemotherapy;Chemotherapy;Targeted Molecular therapy	Not Available;Not Available;Not Available;Not Available;Not Available	Not Available;Not Available;Not Available;Not Available;Not Available	Not Available;Not Available;Not Available;Not Available;Not Available	NO;NO;NO;NO;NO	2012;2012;2012;2012;2012	Not Available	NA
TCGA-A6-2672	1419	Alive	T3	N1	M0	Stage IIIB	NA			82	Discrepancy	TCGA-A6-2672	b612d491-7442-4119-a53c-5ebcc35c31f4	NO	Not Available	Not Available	NO	4	-30237	Not Applicable	0	503	Not Available	NA																								NOT HISPANIC OR LATINO	NA
TCGA-AA-3872	0	Alive	T4	N2	M1	Stage IV	NA			45	Sigmoid Colon	TCGA-AA-3872	20ccd267-74e5-4574-a8e1-028bcd74aaeb	NO	Not Available	Not Available	Not Available	18	-16651	Not Applicable	0	0	Not Available	NA																								Not Available	NA
TCGA-AA-A01Q	31	Alive	T3	N0	M0	Stage II	NA			48	Ascending Colon	TCGA-AA-A01Q	4be66108-e72a-406b-bb4b-f58ff2877336	NO	Not Available	Not Available	Not Available	15	-17715	Not Applicable	0	31	Not Available	NA																								Not Available	NA
TCGA-AA-3855	975	Alive	T2	N0	M0	Stage I	NA			72	Sigmoid Colon	TCGA-AA-3855	b4c3cf95-a27c-4bcf-9321-38723473e83b	NO	Not Available	Not Available	Not Available	18	-26541	Not Applicable	0	0	Not Available	NA																								Not Available	NA
TCGA-AA-3538	791	Alive	T2	N0	M0	Stage I	NA			54	Descending Colon	TCGA-AA-3538	c594196e-49ef-4195-a6b6-4ef4a1d9ec15	NO	Not Available	Not Available	Not Available	18	-19752	Not Applicable	0	0	Not Available	NA																								Not Available	NA
TCGA-AA-A00L	1157	Alive	T3	N0	M0	Stage IIA	NA			66	Transverse Colon	TCGA-AA-A00L	381cf7f3-cd7b-4660-8175-ff8062f7bf78	NO	Not Available	Not Available	Not Available	15	-24319	Not Applicable	0	31	Not Available	NA																								Not Available	NA
TCGA-AA-A00N	122	Dead	T4	N0	M0	Stage IIB	NA			75	Cecum	TCGA-AA-A00N	e457344d-76fb-46bf-b362-61a6e811d131	NO	Not Available	Not Available	Not Available	15	-27667	122	0	Not Available	Not Available	NA																								Not Available	NA
TCGA-AA-3558	638	Alive	T2	N0	M0	Stage I	NA			70	Sigmoid Colon	TCGA-AA-3558	a56d528b-238a-4556-92c8-7645304a2da0	NO	Not Available	Not Available	Not Available	18	-25752	Not Applicable	0	0	Not Available	NA																								Not Available	NA
TCGA-AA-3679	457	Alive	T3	N2	M1	Stage IV	NA			59	Descending Colon	TCGA-AA-3679	d17a2ab0-faef-40de-a87d-1291868b200d	NO	Not Available	Not Available	Not Available	18	-21611	Not Applicable	0	30	Not Available	NA	TCGA-AA-3679-D37459;TCGA-AA-3679-D37460;TCGA-AA-3679-D37461;TCGA-AA-3679-D37462	190D149A-867E-4A51-AC82-5253C7C98D08;547AD4AC-2155-44BE-A664-9C74D157121B;840B021A-FBFE-4ED4-944D-A1B47F95B6A6;AED3958D-DA22-4743-AE53-4EF7F530F02B	Not Available;Not Available;Not Available;Not Available	3;3;3;3	Not Available;Not Available;Not Available;Not Available	61;61;61;61	Folinic acid;5-Fluorouracil;Irinotecan;Bevacizumab	Not Applicable;Not Applicable;Not Applicable;Not Applicable	12;12;12;12	Not Available;Not Available;Not Available;Not Available	Not Available;Not Available;Not Available;Not Available	Not Available;Not Available;Not Available;Not Available	Not Available;Not Available;Not Available;Not Available	Not Applicable;Not Applicable;Not Applicable;Not Applicable	Not Available;Not Available;Not Available;Not Available	Not Available;Not Available;Not Available;Not Available	YES;YES;YES;YES	Chemotherapy;Chemotherapy;Chemotherapy;Targeted Molecular therapy	Not Available;Not Available;Not Available;Not Available	Not Available;Not Available;Not Available;Not Available	Not Available;Not Available;Not Available;Not Available	NO;NO;NO;NO	2012;2012;2012;2012	Not Available	NA
TCGA-AA-3850	0	Dead	T2	N0	M0	Stage I	NA			74	Transverse Colon	TCGA-AA-3850	21bdad0d-c6a2-428c-b2b4-0de282b34abc	NO	Not Available	Not Available	Not Available	18	-27090	0	0	Not Available	Not Available	NA																								Not Available	NA
TCGA-AA-3858	945	Alive	T2	N0	M0	Stage I	NA			67	Sigmoid Colon	TCGA-AA-3858	44c2854e-3f8c-48e1-b4d5-1b5778d4fce4	NO	Not Available	Not Available	Not Available	18	-24806	Not Applicable	0	0	Not Available	NA																								Not Available	NA
TCGA-AA-A02O	28	Alive	T3	N0	M0	Stage II	NA			82	Transverse Colon	TCGA-AA-A02O	6fa41234-9077-4d05-a295-6820f3bedf5b	NO	Not Available	Not Available	Not Available	15	-30288	Not Applicable	0	28	Not Available	NA																								Not Available	NA
TCGA-AA-A01G	365	Alive	T3	N0	M0	Stage IIA	NA			63	Cecum	TCGA-AA-A01G	6f2b5a14-569c-4084-8c67-b1a44d787897	NO	Not Available	Not Available	Not Available	15	-23133	Not Applicable	0	31	Not Available	NA																								Not Available	NA
TCGA-AA-3870	912	Alive	T3	N2	M1	Stage IV	NA			71	Ascending Colon	TCGA-AA-3870	beb63625-d9bf-4ccd-bc53-635b53d24240	NO	Not Available	Not Available	Not Available	18	-26086	Not Applicable	0	0	Not Available	NA	TCGA-AA-3870-D37497;TCGA-AA-3870-D37498;TCGA-AA-3870-D37499	A524BF8C-3693-4873-8114-6CC5177E2C3D;D94292F6-51D0-454D-B608-9D1D674D5981;C0DDC956-119F-4DAE-B704-8917CA66D803	Not Available;Not Available;Not Available	3;3;3	212;212;153	30;30;30	Folinic acid;5-Fluorouracil;Oxaliplatin	Complete Response;Complete Response;Complete Response	12;12;12	Not Available;Not Available;Not Available	Not Available;Not Available;Not Available	Not Available;Not Available;Not Available	Not Available;Not Available;Not Available	Not Applicable;Not Applicable;Not Applicable	Not Available;Not Available;Not Available	Not Available;Not Available;Not Available	NO;NO;NO	Chemotherapy;Chemotherapy;Chemotherapy	Not Available;Not Available;Not Available	Not Available;Not Available;Not Available	Not Available;Not Available;Not Available	NO;NO;NO	2012;2012;2012	Not Available	NA
TCGA-AA-3971	489	Alive	T3	N1	M0	Stage III	NA			58	Sigmoid Colon	TCGA-AA-3971	10994156-7c2f-420e-aeb8-11d566b3d5e4	NO	Not Available	Not Available	Not Available	18	-21518	Not Applicable	0	0	Not Available	NA	TCGA-AA-3971-D37423;TCGA-AA-3971-D37424;TCGA-AA-3971-D37425	5F0380B5-59E5-4BB8-B7AC-1DD2C7E02145;F71B9357-6613-4BF8-8F2D-9B49B35F1912;969A32A8-5D14-4A37-9062-DAF425EA1C5B	Not Available;Not Available;Not Available	3;3;3	215;215;215	31;31;31	Folinic acid;5-Fluorouracil;Oxaliplatin	Complete Response;Complete Response;Complete Response	12;12;12	Not Available;Not Available;Not Available	Not Available;Not Available;Not Available	Not Available;Not Available;Not Available	Not Available;Not Available;Not Available	Not Applicable;Not Applicable;Not Applicable	Not Available;Not Available;Not Available	Not Available;Not Available;Not Available	NO;NO;NO	Chemotherapy;Chemotherapy;Chemotherapy	Not Available;Not Available;Not Available	Not Available;Not Available;Not Available	Not Available;Not Available;Not Available	NO;NO;NO	2012;2012;2012	Not Available	NA
TCGA-AA-3875	549	Alive	T1	N0	M0	Stage I	NA			78	Ascending Colon	TCGA-AA-3875	5498d5ef-ad24-4034-9750-7c996c5355e1	NO	Not Available	Not Available	Not Available	18	-28640	Not Applicable	0	0	Not Available	NA																								Not Available	NA
TCGA-AA-A00F	1035	Alive	T3	N2	M0	Stage IIIC	NA			66	Sigmoid Colon	TCGA-AA-A00F	60ad2c8a-6bbf-43fc-ae73-cc1f6d6c163c	NO	Not Available	Not Available	Not Available	15	-24379	Not Applicable	0	0	Not Available	NA	TCGA-AA-A00F-D37417;TCGA-AA-A00F-D37418;TCGA-AA-A00F-D37419	A79924C7-E384-46D8-9AA7-C45D0D21E753;41FF725E-E12B-4A08-8828-37F0E889E44E;157B2E65-0CA0-485B-9762-7F17FCBD7934	Not Available;Not Available;Not Available	3;3;3	213;213;213	61;61;61	Folinic acid;5-Fluorouracil;Oxaliplatin	Partial Response;Partial Response;Partial Response	12;12;12	Not Available;Not Available;Not Available	Not Available;Not Available;Not Available	Not Available;Not Available;Not Available	Not Available;Not Available;Not Available	Not Applicable;Not Applicable;Not Applicable	Not Available;Not Available;Not Available	Not Available;Not Available;Not Available	NO;NO;NO	Chemotherapy;Chemotherapy;Chemotherapy	Not Available;Not Available;Not Available	Not Available;Not Available;Not Available	Not Available;Not Available;Not Available	NO;NO;NO	2012;2012;2012	Not Available	NA
TCGA-AA-A00O	822	Alive	T3	N2	M0	Stage IIIC	NA			83	Sigmoid Colon	TCGA-AA-A00O	01f493d4-229d-47a6-baa8-32a342c65d01	NO	Not Available	Not Available	Not Available	15	-30316	Not Applicable	0	0	Not Available	NA																								Not Available	NA
TCGA-AA-A010	1064	Alive	T4	N0	M0	Stage IIB	NA			46	Transverse Colon	TCGA-AA-A010	0712566e-3371-4715-95f1-5b792e72d758	NO	Not Available	Not Available	Not Available	15	-16922	Not Applicable	0	0	Not Available	NA	TCGA-AA-A010-D37410;TCGA-AA-A010-D37411;TCGA-AA-A010-D37412	F4C201FC-604D-4378-BF80-1D0B46DC40EF;196D63A5-A0C3-4567-B52C-C80754DC5D60;5E8AE646-9F65-4EE8-BED1-F1874A391471	Not Available;Not Available;Not Available	3;3;3	183;183;183	0;0;0	Folinic acid;5-Fluorouracil;Oxaliplatin	Complete Response;Complete Response;Complete Response	12;12;12	Not Available;Not Available;Not Available	Not Available;Not Available;Not Available	Not Available;Not Available;Not Available	Not Available;Not Available;Not Available	Not Applicable;Not Applicable;Not Applicable	Not Available;Not Available;Not Available	Not Available;Not Available;Not Available	NO;NO;NO	Chemotherapy;Chemotherapy;Chemotherapy	Not Available;Not Available;Not Available	Not Available;Not Available;Not Available	Not Available;Not Available;Not Available	NO;NO;NO	2012;2012;2012	Not Available	NA
TCGA-AA-A00J	549	Alive	T4	N1	M0	Stage IIIB	NA			80	Ascending Colon	TCGA-AA-A00J	56e612e8-2c29-4782-be79-2813cc8dd2e6	NO	Not Available	Not Available	Not Available	15	-29371	Not Applicable	0	0	Not Available	NA	TCGA-AA-A00J-D37416	B3019D2B-1967-4313-8010-AE45C7D73ADA	Not Available	3	245	31	5-Fluorouracil	Partial Response	12	Not Available	Not Available	Not Available	Not Available	Not Applicable	Not Available	Not Available	NO	Chemotherapy	Not Available	Not Available	Not Available	NO	2012	Not Available	NA
TCGA-AA-3941	730	Alive	T4	N1b	M1a	Stage IVA	NA			84	Ascending Colon	TCGA-AA-3941	835c3e23-ac2b-4bc9-ac65-e3e81adecf77	NO	Not Available	Not Available	Not Available	18	-31015	Not Applicable	0	31	Not Available	NA																								Not Available	NA
TCGA-AA-3950	730	Alive	T3	N0	M0	Stage IIA	NA			79	Ascending Colon	TCGA-AA-3950	cc53bf9e-5e27-4305-a08b-552120c10aa5	NO	Not Available	Not Available	Not Available	18	-29130	Not Applicable	0	31	Not Available	NA																								Not Available	NA
[truncated: 117 more columns]
