# Supplementary material for: Molecular subtypes based on DNA methylation predict prognosis in colon adenocarcinoma patients
Source: Aging (Albany NY). 2019 Dec 18;11(24):11880–92. doi: 10.18632/aging.102492 (PMC6949097; doi:10.18632/aging.102492)
Supplement: Supplementary Table 6 [file aging-11-102492-s009..xlsx]

## Sheet: Supplementary Table 7
Supplementary Table 6. Univariate Cox regression analysis of the training dataset (864 CpG sites were identified, P<0.05).
	p.value	HR	Low 95%CI	High 95%CI
cg00000292	0.116908	0.213945	0.0311266	1.47052
cg00002426	0.819091	1.13802	0.375809	3.44616
cg00003994	0.906661	0.933806	0.297215	2.93388
cg00005847	0.803308	1.34331	0.131683	13.7033
cg00007981	0.735538	235.56	4.05e-12	1.36993e+16
cg00008493	0.503569	5287.48	6.51e-08	429628000000000
cg00008713	0.127288	2.12e-10	7.79e-23	575.738
cg00009407	0.0745281	1.68e-20	3.1e-42	90.8459
cg00011459	0.859902	0.369745	5.88e-06	23239.2
cg00012199	0.687088	0.17188	3.27e-05	904.503
cg00012386	0.319293	1.36e-06	3.84e-18	478610
cg00012792	0.189413	5.54e-08	8.06e-19	3811.06
cg00013618	0.0513554	4.39095	0.991331	19.4491
cg00014085	0.881192	6.32225	1.99e-10	201075000000
cg00015770	0.19083	0.411772	0.108968	1.55602
cg00016968	0.486459	2.48817	0.19098	32.417
cg00019495	0.60712	2.699	0.0613139	118.809
cg00020533	0.396957	6.73049	0.0816765	554.621
cg00021527	0.397104	1.65e-05	1.4e-16	1.94002e+06
cg00022866	0.258625	2.77923	0.471742	16.3736
cg00024396	0.417278	0.602478	0.177101	2.04957
cg00024812	0.0473896	1.59e-27	5.14e-54	0.491289
cg00025138	0.977889	3.01733	3.65e-34	2.5e+34
cg00025991	0.870806	1.27415	0.0687317	23.6204
cg00027083	0.529387	0.677948	0.201909	2.27634
cg00029826	0.333771	154.194	0.0056377	4.21728e+06
cg00029931	0.382918	0.540582	0.135766	2.15245
cg00030047	0.689408	1.27594	0.386213	4.21535
cg00031162	0.0142785	10.8012	1.60979	72.473
cg00032227	0.49679	4.53e-10	5.08e-37	4.03832e+17
cg00033516	0.68414	0.0423687	1.03e-08	174430
cg00033773	0.396531	0.312975	0.0213432	4.58943
cg00034039	0.55798	0.00699217	4.3e-10	113645
cg00035623	0.329874	4.21365	0.233423	76.063
cg00037763	0.901465	1.08973	0.279608	4.24705
cg00037940	0.2426	19.0587	0.135824	2674.32
cg00040861	0.159793	2788630000000000	8.15e-07	9.55e+36
cg00040873	0.331951	4.06288	0.239264	68.9909
cg00041575	0.00907278	5.79346	1.54832	21.6778
cg00043004	0.510073	0.266583	0.00521742	13.621
cg00044245	0.86145	0.890014	0.240505	3.29359
cg00047050	0.311204	7675.35	0.000232234	253672000000
cg00047469	0.0444827	2.24e-10	8.66e-20	0.578166
cg00050312	0.208666	2.79189e+07	6.89e-05	1.13134e+19
cg00051979	0.530067	0.0251892	2.57e-07	2464.47
cg00053292	0.689175	10.9456	8.85e-05	1.35437e+06
cg00054706	0.408337	1e-07	2.57e-24	3906766004
cg00056767	0.668164	0.494996	0.0198727	12.3295
cg00059225	0.550343	1.578	0.353173	7.05058
cg00059424	0.256268	3.52e-11	3.16e-29	3.92377e+07
cg00059740	0.529012	62715.7	7.26e-11	5.41713e+19
cg00059930	0.327922	3.23477	0.307902	33.984
cg00060762	0.324295	58642.5	1.94e-05	177669000000000
cg00060882	0.935396	0.864576	0.0256283	29.1667
cg00061059	0.952166	0.648413	4.62e-07	910459
cg00061629	0.00894087	3.93227	1.40875	10.9762
cg00062776	0.636586	0.733619	0.202958	2.65177
cg00063144	0.469175	0.284509	0.00946019	8.55643
cg00065385	0.617549	8.23275	0.00209815	32303.8
cg00065408	0.0632164	2.9e-11	2.21e-22	3.80433
cg00066153	0.433811	0.000796805	1.39e-11	45796.2
cg00066816	0.921899	1.09213	0.187562	6.3592
cg00067471	0.0715228	53.0133	0.7063	3979.06
cg00069261	0.705737	0.30349	0.000622425	147.98
cg00071250	0.940638	1.09356	0.103886	11.5113
cg00071998	0.734649	43.3311	1.49e-08	126358000000
cg00072216	0.697587	147765	1.24e-21	1.76e+31
cg00075967	0.762098	0.824805	0.237017	2.87027
cg00076645	0.0346309	1141.67	1.66331	783624
cg00077877	0.069437	3.59464	0.903248	14.3056
cg00078194	0.956823	0.353266	1.54e-17	8080370000000000
cg00078867	0.324183	2.38536	0.42362	13.4318
cg00079563	0.451879	13.2588	0.0157759	11143.3
cg00080012	0.689697	0.000156768	3.3e-23	745430000000000
cg00081935	0.16955	5.90325	0.46868	74.3543
cg00081975	0.672442	8.48393	0.000420633	171116
cg00083937	0.46467	0.399275	0.0340768	4.67826
cg00084687	0.913561	135.485	4.35e-37	4.22e+40
cg00089071	0.755871	0.000294025	1.6e-26	5.39162e+18
cg00090147	0.414354	1.72401	0.466195	6.37548
cg00091693	0.877444	1.11544	0.278245	4.47161
cg00093177	0.428596	63.9052	0.0021632	1.88788e+06
cg00094851	0.596729	0.0145276	2.26e-09	93309.1
cg00095526	0.537388	2.30911	0.161619	32.9911
cg00095674	0.968633	1.03464	0.189524	5.64825
cg00096922	0.45773	1.53541	0.495123	4.76139
cg00097536	0.150974	7.5e-09	6.12e-20	919.914
cg00098239	0.474865	0.000121699	2.23e-15	6.64577e+06
cg00101227	0.890852	1.22726	0.0658696	22.8659
cg00103783	0.641241	9.1953e+06	4.71e-23	1.8e+36
cg00105253	0.893295	0.272116	1.5e-09	4.94309e+07
cg00105470	0.150142	7.71e-30	1.72e-69	34592171104
cg00107187	0.562375	1.46741	0.400928	5.37079
cg00107632	0.872267	12.7867	4.12e-13	396749000000000
cg00108454	0.726983	1.93935	0.0470822	79.883
cg00109274	0.365418	0.000418537	2.02e-11	8656.65
cg00112517	0.916636	1.27128	0.0142012	113.805
cg00113951	0.822595	0.469874	0.000637596	346.272
cg00116234	0.312321	0.607476	0.230997	1.59754
cg00116838	0.843822	0.864637	0.203428	3.67499
cg00117172	0.813862	0.893162	0.348701	2.28774
cg00119079	0.806549	0.0209623	7.7e-16	570450000000
cg00121158	0.578545	8.7e-06	1.22e-23	6221280000000
cg00121640	0.120463	3.50978	0.719507	17.1208
cg00121904	0.421901	0.494069	0.08841	2.76105
cg00123035	0.504726	0.00294371	1.08e-10	80480.2
cg00126034	0.53442	0.667948	0.187003	2.38581
cg00126657	0.0208419	4.98382	1.27619	19.4629
cg00126698	0.310359	2.94017	0.365992	23.6197
cg00128197	0.216697	0.381202	0.0825343	1.76066
cg00128560	0.64725	22.9985	3.38e-05	1.56396e+07
cg00128654	0.243404	455.078	0.0155604	1.33092e+07
cg00128877	0.404233	0.0170044	1.18e-06	244.598
cg00129774	0.119344	1232820000000000	0.000126136	1.2e+34
cg00131557	0.907901	1.52207	0.00123486	1876.07
cg00132141	0.248072	2.38167	0.546211	10.3849
cg00133909	0.691917	0.105446	1.55e-06	7166.92
cg00134539	0.521768	0.249927	0.00359286	17.3855
cg00134787	0.167189	2.38391	0.69493	8.17781
cg00135056	0.618943	10.1998	0.00108123	96219.3
cg00136105	0.359429	2.9e-09	1.59e-27	5273208277
cg00136405	0.127525	2.70512	0.752216	9.72817
cg00136477	0.196797	3.89071	0.494396	30.6185
cg00138126	0.258732	3.94398	0.364536	42.6707
cg00141162	0.686641	0.626324	0.0645014	6.08176
cg00141845	0.821494	0.767117	0.0766781	7.67453
cg00143376	0.169487	3.50608	0.585556	20.993
cg00143998	0.544598	2.13079	0.184388	24.6236
cg00145118	0.656331	0.608277	0.0681021	5.43303
cg00145348	0.373614	0.572753	0.167801	1.95496
cg00146096	0.937721	3.70662	1.98e-14	694146000000000
cg00149659	0.321454	5.99e-05	2.69e-13	13330.2
cg00149976	0.323184	3.4e-08	5.18e-23	2.23079e+07
cg00151234	0.379872	0.563786	0.156894	2.02591
cg00151607	0.218623	2.53e-22	9.93e-57	6471050000000
cg00155167	0.574935	656.001	9.37e-08	4590350000000
cg00155485	0.426853	5.51e-12	9.3e-40	3.25967e+16
cg00155609	0.448785	717.893	2.92e-05	17636785371
cg00156216	0.854359	58.9631	7.33e-18	4.74e+20
cg00156744	0.216646	4.07e-06	1.15e-14	1447.46
cg00158308	0.0333537	5.04293	1.13612	22.3841
cg00160914	0.776502	1.86577	0.0251651	138.331
cg00162401	0.439737	0.000789527	1.06e-11	58596.4
cg00162643	0.735477	0.031863	6.61e-11	1.53527e+07
cg00164898	0.697169	0.169046	2.19e-05	1306.85
cg00165981	0.27611	32.0752	0.0624656	16470.2
cg00167504	0.247158	0.000306238	3.43e-10	273.686
cg00168082	0.796636	3.43782	0.000286801	41208.5
cg00168785	0.303984	0.0166588	6.77e-06	40.9692
cg00168942	0.971404	1.02692	0.240279	4.38894
cg00171126	0.405734	4.43e-06	1.06e-18	1.84914e+07
cg00171161	0.26236	8.81e-06	1.27e-14	6089.22
cg00174500	0.564461	0.655498	0.155834	2.75727
cg00174901	0.343258	2.01943	0.472073	8.63866
cg00176210	0.928732	0.937365	0.227159	3.86802
cg00176879	0.366446	0.037063	2.91e-05	47.265
cg00177013	0.921336	1.90697	5.2e-06	699082
cg00177698	0.859499	2.2745	0.000254247	20347.8
cg00177923	0.226236	4047254774	1.11e-06	1.47e+25
cg00179446	0.348446	0.473888	0.0994744	2.25756
cg00180012	0.416347	6877.21	3.83e-06	12334700000000
cg00180631	0.2958	0.476469	0.118699	1.91259
cg00183916	0.413239	1.61557	0.512029	5.09749
cg00184884	0.837446	1319.56	2.04e-27	8.53e+32
cg00184893	0.754738	0.150411	1.04e-06	21825.5
cg00185839	0.837529	0.0417482	2.73e-15	638112000000
cg00186141	0.571262	12.2131	0.00211162	70638.2
cg00186701	0.801283	1.18651	0.313246	4.49428
cg00186954	0.526523	0.398877	0.0232028	6.85704
cg00187380	0.33632	63.8366	0.0133472	305315
cg00187686	0.811755	0.859223	0.246508	2.99489
cg00191052	0.86216	0.908843	0.308954	2.67352
cg00197381	0.759073	0.0145406	2.63e-14	8029148422
cg00197641	0.446406	0.00109747	2.64e-11	45569.8
cg00199549	0.0538721	0.256763	0.0644516	1.0229
cg00200063	0.67749	1.16e-05	6.42e-29	2.10136e+18
cg00201234	0.376646	3.60776	0.20984	62.028
cg00202702	0.791209	0.68669	0.0424858	11.0988
cg00202711	0.467774	1.72637	0.395404	7.53751
cg00206052	0.981992	1.32587	3.06e-11	57524839680
cg00207534	0.17733	4.55e-27	2.44e-65	850373000000
cg00208830	0.125072	5.10022	0.635937	40.9039
cg00208967	0.815826	1.13785	0.383824	3.37317
cg00209066	0.834148	2.57042	0.000373348	17696.8
cg00209951	0.997212	1.0028	0.208766	4.81692
cg00210842	0.626754	13908.7	2.78e-13	6.95e+20
cg00211661	0.558768	1.64748	0.309018	8.78331
cg00213331	0.634204	206.615	6.01e-08	710625000000
cg00214855	0.765203	0.215362	9.06e-06	5120.8
cg00215066	0.123924	2.74e-06	2.24e-13	33.4116
cg00216361	0.787157	1.2657	0.228827	7.00094
cg00216758	0.827716	12.4298	1.73e-09	89345064639
cg00217795	0.887733	1.10296	0.282919	4.29993
cg00221494	0.0358778	4.50067	1.10426	18.3435
cg00223186	0.353984	8.38e-11	4.13e-32	170201000000
cg00223950	0.59862	0.00141383	3.47e-14	5.76385e+07
cg00224508	0.0696961	1.45e-15	1.34e-31	15.6687
cg00226923	0.637975	0.458493	0.0178091	11.8039
cg00228799	0.30645	1.02492e+08	4.56e-08	2.31e+23
cg00229387	0.6764	2.17438	0.0566572	83.4477
cg00230271	0.601291	7.52e-05	2.57e-20	220296000000
cg00230368	0.185531	4.92e-11	2.7e-26	89587.4
cg00230502	0.51878	1.75361	0.318387	9.65848
cg00230685	0.246932	0.470668	0.131429	1.68554
cg00231140	0.931528	0.8435	0.0173789	40.9399
cg00231644	0.218792	0.28555	0.0387392	2.10481
cg00231920	0.690049	0.0316119	1.34e-09	746073
cg00233307	0.915647	0.906202	0.146453	5.60726
cg00234616	0.867239	1.12456	0.283937	4.45395
cg00236832	0.557027	2.15105	0.166895	27.7243
cg00237010	0.782502	1.3282	0.17706	9.96339
cg00239071	0.305098	160.114	0.00980649	2.61425e+06
cg00239685	0.930786	2.46719	3.48e-09	1747879405
cg00240432	0.43934	1.54768	0.511601	4.68199
cg00241355	0.112374	20386.3	0.0975687	4259592508
cg00243313	0.793049	0.848433	0.248507	2.89665
cg00247489	0.534482	0.652654	0.16981	2.50843
cg00250430	0.126138	0.505177	0.210584	1.21188
cg00253200	0.460065	2.13399e+06	3.44e-11	1.32e+23
cg00256074	0.0657512	0.050964	0.00213959	1.21394
cg00256166	0.558786	10344.8	3.6e-10	2.97626e+17
cg00256281	0.141731	7.88e-10	5.68e-22	1094.84
cg00259755	0.0587679	8.93874	0.922034	86.6573
cg00261552	0.395817	1.6e-07	3.26e-23	7.80228e+08
cg00261781	0.535182	9.33e-06	1.18e-21	73829300331
cg00262415	0.418959	2.61e-09	4.02e-30	1699440000000
cg00263760	0.480392	1.38625	0.559611	3.43396
cg00265415	0.894127	0.0312515	2.13e-24	4.58e+20
cg00265490	0.367408	7.43e-06	5.22e-17	1.05712e+06
cg00268009	0.0676453	103.07	0.714362	14871.3
cg00268338	0.54394	2.07072	0.197314	21.7314
cg00269115	0.493478	3077981320	2.15e-18	4.42e+36
cg00273068	0.473051	1.76734	0.373035	8.37316
cg00273124	0.270882	2.65662	0.466632	15.1246
cg00274399	0.759867	0.00977677	1.27e-15	75462524603
cg00275232	0.0624522	173425	0.533986	56323733199
cg00276797	0.450479	9444.18	4.47e-07	199454000000000
cg00278366	0.921262	0.927114	0.206739	4.15761
cg00279797	0.716792	0.68858	0.0917079	5.17013
cg00282347	0.914131	0.944661	0.335643	2.65873
cg00282683	0.415782	6.86e-07	9.78e-22	480808992
cg00283535	0.832826	0.838046	0.162471	4.32274
cg00288562	0.683843	0.00132792	1.89e-17	93175055855
cg00290028	0.677648	0.072505	3.07e-07	17135.2
cg00290506	0.194201	1.97416	0.707042	5.51211
cg00291877	0.831325	0.118288	3.49e-10	40121997
cg00292662	0.821699	0.0704337	6.71e-12	7.38984e+08
cg00292971	0.454081	0.250593	0.00669002	9.38664
cg00293409	0.354122	1.66805	0.565196	4.92288
cg00294382	0.788949	1.24263	0.253255	6.09713
cg00295206	0.948224	2.63547	5.23e-13	13287600000000
cg00295325	0.408499	2.69094	0.25732	28.1407
cg00297584	0.520638	2.47092	0.156378	39.0428
cg00298357	0.502102	0.384914	0.0236898	6.25411
cg00302793	0.0127463	2.88e-14	6.36e-25	0.00130083
cg00303548	0.723049	1.22057	0.405336	3.67547
cg00307685	0.66863	0.448774	0.0114457	17.5959
cg00308133	0.136954	2.22502	0.775526	6.38367
cg00308665	0.308954	3.32985	0.328113	33.7928
cg00309056	0.237697	1.05e-05	5.65e-14	1935.47
cg00309204	0.919055	0.153929	3.26e-17	726043000000000
cg00311768	0.780288	1.45536	0.1042	20.3271
cg00312919	0.31646	0.00174061	6.95e-09	435.843
cg00314943	0.506192	12.347	0.00746999	20408
cg00315936	0.509415	0.000384769	2.76e-14	5.36773e+06
cg00317680	0.622255	0.163545	0.000121678	219.818
cg00318573	0.684464	0.764865	0.20995	2.78647
cg00318865	0.524932	1.13e-05	6.42e-21	20003383229
cg00319761	0.886679	1044.14	3.17e-39	3.44e+44
cg00320243	0.377008	141512	5.29e-07	3.78765e+16
cg00321065	0.464643	2.33e-07	3.87e-25	140078000000
cg00321478	0.489296	1.55024	0.447385	5.37179
cg00323915	0.844131	0.881827	0.251727	3.08914
cg00324733	0.904422	4.88144	2.82e-11	846075000000
cg00327185	0.431784	0.000163939	5.99e-14	448763
cg00327483	0.379988	48.061	0.00845614	273158
cg00328227	0.286465	2.44349	0.472659	12.632
cg00331237	0.599823	2.00567	0.148973	27.0029
cg00331433	0.631099	0.017757	1.27e-09	248288
cg00332153	0.481352	0.699549	0.258742	1.89134
cg00332745	0.919693	0.0653375	6.05e-25	7.06e+21
cg00333226	0.285435	2.287	0.501267	10.4343
cg00333528	0.241732	2.41277	0.552202	10.5422
cg00334507	0.895228	1.14355	0.155326	8.4191
cg00335286	0.194628	2.51501	0.624119	10.1348
cg00336605	0.0353567	114026	2.22203	5851316023
cg00338702	0.824327	1.11326	0.431712	2.87075
cg00338893	0.561892	0.00942107	1.34e-09	66026.9
cg00342530	0.434455	2.13096	0.319609	14.208
cg00343092	0.82912	0.400481	9.85e-05	1627.6
cg00344358	0.403892	15.0413	0.0258739	8744.01
cg00344372	0.0561036	13.2892	0.934865	188.908
cg00346145	0.621461	188.891	1.74e-07	204735000000
cg00347729	0.957178	1.058	0.135104	8.28529
cg00347904	0.613842	0.791975	0.320099	1.95947
cg00350296	0.969744	1.0464	0.100418	10.904
cg00350478	0.341837	3.7158	0.248105	55.6504
cg00350702	0.312936	3.65e-10	1.71e-28	7.81971e+08
cg00351011	0.378538	1.55902	0.580252	4.18876
cg00354258	0.60484	3.44027	0.031925	370.727
cg00354572	0.693624	0.761177	0.195815	2.95887
cg00355802	0.952233	0.44454	1.34e-12	147180000000
cg00359325	0.677378	185.091	3.85e-09	8890810000000
cg00359973	0.345279	4.04619	0.22202	73.7395
cg00363813	0.681403	2.11535	0.0591567	75.6418
cg00364814	0.155131	430.06	0.100641	1.83774e+06
cg00367281	0.80222	1.20156	0.285587	5.05536
cg00367438	0.411646	0.00115625	1.13e-10	11868.5
cg00368022	0.941299	1.20629	0.0081944	177.577
cg00368415	0.356236	5.73e-08	2.37e-23	1.38992e+08
cg00371195	0.0253678	16670.4	3.3174	8.37706e+07
cg00374717	0.434697	24.9921	0.0077758	80326.9
cg00375964	0.82331	9.67238	2.16e-08	4327094611
cg00376639	0.948995	0.612096	1.8e-07	2.08243e+06
cg00380464	0.126233	9.42e-10	2.54e-21	349.203
cg00381076	0.371458	7.33524	0.0928072	579.758
cg00382515	0.741302	2459.92	1.82e-17	3.33e+23
cg00386408	0.725084	0.668675	0.0709731	6.29995
cg00387170	0.45207	0.0644926	5.09e-05	81.7438
cg00392257	0.39038	2.76048	0.272091	28.0063
cg00393585	0.609065	1.30114	0.474438	3.56836
cg00394658	0.257157	2.58049	0.500713	13.2988
cg00396163	0.683318	0.485409	0.0150661	15.6392
cg00396894	0.176189	0.350681	0.0768187	1.60088
cg00397740	0.412228	705.92	0.000109518	4550133292
cg00398048	0.603853	1.53577	0.30374	7.76515
cg00399483	0.907249	1.07527	0.317185	3.64521
cg00400263	0.613992	6.87478	0.0038352	12323.4
cg00402366	0.503958	0.016178	9.04e-08	2896.74
cg00404599	0.967018	1.03961	0.16487	6.55543
cg00405070	0.268432	537985	3.81e-05	7588010000000000
cg00405568	0.465041	0.00103443	1.01e-11	105584
cg00407150	0.357077	2.36627	0.378425	14.7961
cg00410419	0.149875	480811	0.00887493	26048600000000
cg00410898	0.0864563	9.0808	0.729052	113.107
cg00411097	0.980497	0.952165	0.0187026	48.4755
cg00412772	0.587408	2.15099	0.135232	34.2135
cg00412805	0.865938	2.9158	1.17e-05	725225
cg00415978	0.871527	0.846426	0.112201	6.38531
cg00415993	0.323227	0.399734	0.0648117	2.4654
cg00417297	0.203389	835730000000000	8.48e-09	8.23e+37
cg00418150	0.831512	1.24009	0.170832	9.00195
cg00419564	0.411061	0.000133875	7.79e-14	230055
cg00420568	0.0400308	577.366	1.33565	249579
cg00420715	0.552748	0.000163423	5.14e-17	5.19151e+08
cg00420929	0.355831	0.360919	0.0414886	3.13973
cg00422913	0.621733	0.0056907	6.88e-12	4.70476e+06
cg00424946	0.422142	9.86e-08	7.72e-25	12598302010
cg00425710	0.785617	1.39851	0.124758	15.677
cg00425792	0.40956	1536.57	4.1e-05	57535619267
cg00426056	0.528071	0.015629	3.83e-08	6371.08
cg00426498	0.497608	3.26767	0.106719	100.054
cg00426963	0.134702	3.53e-16	2e-36	62346.6
cg00427635	0.774118	1.42107	0.128929	15.6633
cg00430287	0.417786	1.76593	0.446238	6.98848
cg00431050	0.773464	1.38299	0.152044	12.5798
cg00431549	0.712081	0.799889	0.244374	2.61821
cg00432979	0.868893	0.00170484	2.3e-36	1.27e+30
cg00433406	0.144174	0.12013	0.00699026	2.06447
cg00434413	0.825195	0.764605	0.0706425	8.27576
cg00435408	0.348082	8.34e-12	6.02e-35	1155180000000
cg00436282	0.320648	1.8578	0.54717	6.30778
cg00436301	0.123666	5.44e-15	3.77e-33	7852.47
cg00436603	0.772067	1.25113	0.274757	5.69709
cg00441382	0.922651	0.110197	5.1e-21	2.38175e+18
cg00443307	0.377732	1.78493	0.492636	6.4672
cg00445824	0.520606	1.44205	0.471999	4.40574
cg00446235	0.650294	0.171798	8.47e-05	348.517
cg00447208	0.950816	0.917252	0.0589605	14.2697
cg00448720	0.173671	3.33751	0.58799	18.9442
cg00449941	0.0981872	20895700000000	0.00341348	1.28e+29
cg00451635	0.959986	1.08964	0.0380883	31.1728
cg00453193	0.290244	1.88e-10	1.79e-28	1.98567e+08
cg00453258	0.649431	0.514137	0.0291943	9.05443
cg00459975	0.991395	1.02055	0.025304	41.1605
cg00461841	0.0487616	15.8295	1.01512	246.84
cg00462311	0.324675	32.9738	0.0314038	34622.3
cg00462994	0.802056	1.35702	0.124733	14.7636
cg00463202	0.725694	0.488728	0.00895645	26.6685
cg00463577	0.0839697	0.317041	0.0861581	1.16664
cg00463848	0.0859849	3.37163	0.841971	13.5015
cg00464269	0.289628	1.15e-12	9.14e-35	14431164201
cg00465284	0.420939	0.586194	0.159639	2.15251
cg00466249	0.832063	1.33851	0.0904299	19.812
cg00466544	0.491447	4.51e-06	2.67e-21	7632681647
cg00468146	0.802754	0.828441	0.189186	3.62772
cg00469635	0.439004	2.27e-17	1.59e-59	3.24e+25
cg00471562	0.75924	94.9204	2.15e-11	419562000000000
cg00472814	0.36198	1.60222	0.581518	4.4145
cg00474004	0.602552	1.38276	0.40832	4.68263
cg00474209	0.972672	0.957879	0.0816633	11.2356
cg00475955	0.338407	5.58e-20	2.13e-59	1.46e+20
cg00476580	0.571684	0.121261	8.1e-05	181.566
cg00479269	0.407231	2.39e-07	5.24e-23	1090422220
cg00480115	0.658527	1.50109	0.247781	9.09383
cg00480209	0.866116	17.6353	5.71e-14	5445600000000000
cg00480356	0.605002	9.31564	0.00197908	43849.1
cg00483154	0.41685	5.11e-08	1.27e-25	20475102938
cg00485296	0.615972	8.72e-05	1.19e-20	637207000000
cg00485380	0.165481	52674400000000	2.14e-06	1.3e+33
cg00487159	0.307292	5.92e-06	5.44e-16	64355.3
cg00488364	0.623329	1.45857	0.323403	6.57828
cg00488718	0.226783	2.39e-11	1.43e-28	3.99576e+06
cg00489401	0.616581	1.76483	0.190984	16.3084
cg00491404	0.468688	2.44794	0.217349	27.5704
cg00491839	0.136788	2.38e-06	9.34e-14	60.8289
cg00493400	0.894543	39.3876	1.02e-22	1.53e+25
cg00495415	0.280098	1.38e-12	4.13e-34	4593495357
cg00495442	0.345343	0.000494314	6.72e-11	3634.89
cg00496170	0.0805501	1.59e-18	1.73e-38	145.902
cg00497084	0.995605	0.995428	0.194935	5.08313
cg00497251	0.641513	0.0473213	1.25e-07	17891.7
cg00498305	0.0271445	5.03956	1.20035	21.1581
cg00498604	0.657001	0.834681	0.375951	1.85315
cg00499599	0.918922	3.06208	1.34e-09	6984017318
cg00499822	0.743705	1.34536	0.227248	7.96477
cg00500400	0.719263	0.0322248	2.36e-10	4.39226e+06
cg00502442	0.399382	1.22e-12	2.39e-40	6223720000000000
cg00503458	0.464733	0.00244625	2.44e-10	24532.8
cg00503840	0.638067	1.89666	0.131744	27.3053
cg00504595	0.932794	1.15426	0.0411385	32.3862
cg00509616	0.876424	1.31381	0.0421247	40.9761
cg00510787	0.844646	0.66264	0.0108063	40.6331
cg00510956	0.237635	30.622	0.104634	8961.8
cg00511475	0.421422	1.93656	0.386617	9.70017
cg00512279	0.406025	1.74109	0.470727	6.43978
cg00512374	0.647921	0.0900088	2.92e-06	2770.3
cg00513467	0.0909363	64.7944	0.514301	8163.15
cg00514407	0.227965	2.75252	0.530718	14.2757
cg00514895	0.941197	1.03831	0.382368	2.81952
cg00515905	0.551548	1.87772	0.236019	14.9387
cg00516481	0.333104	2.03487	0.48278	8.57677
cg00518989	0.620588	0.000923427	8.92e-16	9.56181e+08
cg00519208	0.442176	1.59755	0.483708	5.27628
cg00519627	0.947654	0.0296453	7.15e-48	1.23e+44
cg00520135	0.0414839	7.11002	1.07866	46.8659
cg00520708	0.849171	0.508231	0.000475022	543.761
cg00521434	0.0533495	0.0585536	0.00329094	1.0418
cg00521598	0.675137	80.876	9.68e-08	67571847671
cg00522034	0.729704	1.10016e+07	1.26e-33	9.64e+46
cg00522316	0.144044	9.35e-10	7.19e-22	1215.05
cg00524288	0.632483	941.901	6.1e-10	1453590000000000
cg00528052	0.124804	679584000000	0.000528996	8.73e+26
cg00528967	0.451559	1880900000000	2.08e-20	1.7e+44
cg00532335	0.904452	0.893156	0.141152	5.65153
cg00532890	0.794444	0.0923903	1.53e-09	5.58203e+06
cg00534274	0.0850774	78.4916	0.547141	11260.2
cg00536175	0.86659	1.28381	0.0696035	23.6792
cg00537910	0.446149	0.00962928	6.25e-08	1482.74
cg00539322	0.533334	11.7834	0.00501921	27663.2
cg00539716	0.482561	0.000619744	6.9e-13	556990
cg00540544	0.383706	1.43e-06	1.01e-19	2.02326e+07
cg00544557	0.942861	0.948088	0.220683	4.07313
cg00545573	0.341952	2678.48	0.000228085	31454297189
cg00546491	0.129279	5.3031	0.614338	45.7775
cg00546897	0.946426	1.10554	0.0592387	20.632
cg00547018	0.995655	0.984813	0.00399224	242.936
cg00547789	0.650375	0.80991	0.325452	2.01552
cg00547829	0.289792	7.33e-07	3.21e-18	167451
cg00548060	0.315066	0.121797	0.0020036	7.40396
cg00548268	0.298446	2.91013	0.388544	21.7964
cg00550617	0.713369	1.47378	0.186098	11.6714
cg00554250	0.31107	3.58508	0.303128	42.4005
cg00554682	0.721273	1.22702	0.398759	3.77568
cg00554702	0.249861	21.0945	0.117142	3798.62
cg00556408	0.897231	0.892814	0.159798	4.98828
cg00557354	0.628443	1.27716	0.474165	3.44003
cg00559473	0.845303	0.218665	5.1e-08	937156
cg00560119	0.490994	369351	5.29e-11	2.58e+21
cg00563229	0.728949	0.000777437	2.01e-21	300121000000000
cg00563845	0.677687	1.89078	0.0937725	38.1247
cg00563926	0.169656	2.59173	0.665767	10.0892
cg00563932	0.431122	0.395106	0.0391476	3.98769
cg00564163	0.345846	4.70887	0.187855	118.035
cg00565075	0.208582	3.46482	0.499467	24.0356
cg00565688	0.947161	0.966497	0.352791	2.64779
cg00566759	0.698313	18.1406	7.84e-06	4.20014e+07
cg00567479	0.319183	2.45e-11	3.23e-32	18512398324
cg00567749	0.697167	0.827926	0.319853	2.14305
cg00568128	0.387717	1545.1	8.97e-05	26607151662
cg00568792	0.0295053	2.82e-13	1.41e-24	0.0563002
cg00569620	0.222829	1.87e-07	2.87e-18	12264.2
cg00571634	0.976062	0.784847	1.05e-07	5.85244e+06
cg00573606	0.759837	0.779477	0.157798	3.85039
cg00575744	0.805537	0.69624	0.0389871	12.4336
cg00576250	0.544868	0.682054	0.19764	2.35377
cg00577167	0.208675	2.67231	0.577275	12.3706
cg00577464	0.982146	0.902346	0.000111381	7310.32
cg00579393	0.892871	1.18947	0.0952089	14.8604
cg00579402	0.828928	1.20494	0.222105	6.53691
cg00581156	0.96776	0.348029	2.06e-23	5.89e+21
cg00582628	0.291684	5.17251	0.24383	109.728
cg00584022	0.277519	4.61e-05	6.86e-13	3093.82
cg00585790	0.16188	2.37582	0.706681	7.98736
cg00585846	0.830053	120.438	1.2e-17	1.21e+21
cg00586909	0.137856	3.86e-05	5.73e-11	26.0654
cg00587613	0.921121	0.913709	0.153132	5.45191
cg00592315	0.318277	0.325154	0.0358006	2.95317
cg00594118	0.0772015	3.83e-07	2.93e-14	5.01303
cg00594952	0.28617	0.328513	0.0424763	2.54073
cg00597076	0.307025	3.20485	0.342999	29.9448
cg00598858	0.30212	21107186467	5.18e-10	8.6e+29
cg00600110	0.411799	2.23221	0.328045	15.1892
cg00600684	0.735645	0.342988	0.000687879	171.02
cg00601486	0.336676	3.15506	0.302705	32.8849
cg00602891	0.500781	0.000183638	2.44e-15	1.38074e+07
cg00605270	0.928827	2.48208	5.39e-09	1143600145
cg00609097	0.973365	1.36944	1.32e-08	141931261
cg00611397	0.0997525	87308	0.114215	66739995300
cg00612467	0.706674	0.0313	4.57e-10	2.14273e+06
cg00613255	0.986506	0.986511	0.204458	4.75993
cg00615377	0.611505	7.33068	0.00336331	15978
cg00615915	0.921028	2.07724	1.1e-06	3.92751e+06
cg00616129	0.864183	8.35521	2.28e-10	306232000000
cg00616369	0.59922	2.59e-14	5.47e-65	1.22e+37
cg00617305	0.395139	0.390393	0.0446625	3.41241
cg00618396	0.259036	0.509134	0.157667	1.64409
cg00619207	0.110829	3.73842	0.739142	18.9081
cg00620223	0.375505	0.00167982	1.23e-09	2301.16
cg00620629	0.419094	4.8e-11	4.48e-36	514677000000000
cg00622552	0.876784	0.682944	0.00550591	84.7112
cg00622677	0.375943	0.0763658	0.000257052	22.687
cg00623593	0.741602	1.38237	0.201715	9.47353
cg00625425	0.313692	2.09287	0.497487	8.8045
cg00625653	0.82526	0.897283	0.342825	2.34848
cg00626119	0.786449	0.622505	0.020179	19.2037
cg00626466	0.474397	2.14499	0.265068	17.3577
cg00629217	0.433446	29.6503	0.00614856	142983
cg00629585	0.201041	0.442683	0.126936	1.54383
cg00630164	0.887062	1.4171	0.0115345	174.102
cg00630249	0.0125986	8.42e-17	1.98e-29	0.00035753
cg00630583	0.734249	9.62e-05	6.22e-28	1.48972e+19
cg00631230	0.626656	0.000344886	3.87e-18	30768000998
cg00633969	0.430084	1.81686	0.412267	8.00687
cg00635481	0.791627	0.228655	4.03e-06	12975.5
cg00636639	0.300449	2.39e-13	3.08e-37	185559000000
cg00638514	0.0549815	0.305688	0.0911122	1.02561
cg00642303	0.109047	4.68e-11	1.08e-23	201.557
cg00644033	0.435077	2.54985	0.243071	26.7484
cg00645579	0.971532	1.04449	0.0956439	11.4065
cg00645922	0.141201	8.76e-08	3.48e-17	220.713
cg00646140	0.815194	2.91845	0.000366939	23211.9
cg00646492	0.0634148	19.5764	0.846922	452.502
cg00648153	0.634131	0.0181396	1.22e-09	269179
cg00648883	0.24972	2.57605	0.514263	12.904
cg00650762	0.416242	14086950064	4.8e-15	4.14e+34
cg00650876	0.225853	1.35e-08	2.47e-21	73523
cg00651216	0.153165	9.7181	0.429064	220.111
cg00653387	0.821288	0.874617	0.27352	2.7967
cg00654814	0.739796	0.83416	0.286101	2.43209
cg00655307	0.910003	1.08774	0.253056	4.67554
cg00657095	0.957705	0.645529	6.09e-08	6.8378e+06
cg00657582	0.847928	1.20956	0.173022	8.4558
cg00658007	0.722071	1.31911	0.286746	6.06827
cg00658626	0.189454	2.31274	0.66107	8.0911
cg00659129	0.912327	1.14845	0.0977403	13.4942
cg00659953	0.445136	0.00108011	2.62e-11	44494.3
cg00660989	0.0998185	0.424864	0.153292	1.17755
cg00661202	0.916187	0.125826	2.16e-18	7339420000000000
cg00661485	0.258694	3.17834	0.427312	23.6404
cg00662556	0.842864	1.2985	0.0981303	17.1824
cg00665395	0.940811	2.06052	1.06e-08	3.99884e+08
cg00666446	0.778987	31.5925	1.06e-09	938781000000
cg00666746	0.528058	1.50327	0.423754	5.33287
cg00668685	0.714057	1.45891	0.193477	11.0009
cg00669623	0.96501	0.929964	0.0362712	23.8435
cg00669856	0.348515	230.586	0.00264785	2.00804e+07
cg00671161	0.621115	2003010000000	3.32e-37	1.21e+61
cg00672638	0.157026	2.79e-09	3.95e-21	1966.32
cg00673191	0.523346	0.400432	0.0240911	6.65581
cg00676660	0.0326527	7.97442	1.18697	53.5746
cg00677811	0.469451	4.88e-08	7.56e-28	3152250000000
cg00678539	0.587077	0.702688	0.196665	2.51071
cg00679556	0.94932	1.0602	0.17481	6.42994
cg00679738	0.12788	40.9985	0.344047	4885.61
cg00682653	0.929477	0.0373942	9.26e-34	1.51e+30
cg00685836	0.865142	1.11878	0.306337	4.08593
cg00686022	0.740012	0.59707	0.0283887	12.5576
cg00686623	0.16538	3.33e-08	9.07e-19	1222.96
cg00687686	0.869833	1.08554	0.406721	2.89732
cg00688421	0.6945	195.372	7.22e-10	52834500000000
cg00689340	0.638917	0.453154	0.016609	12.3637
cg00690049	0.380451	0.512516	0.115078	2.28255
cg00690280	0.705717	0.76898	0.196684	3.0065
cg00691625	0.966466	0.949024	0.0827801	10.88
cg00692549	0.366748	1631.1	0.000172407	15431487304
cg00695416	0.0940802	4.63408	0.76976	27.8979
cg00698688	0.765555	1.47552	0.11442	19.0278
cg00702231	0.254669	4.35916	0.346108	54.9026
cg00702729	0.964774	0.871801	0.00197763	384.316
cg00704310	0.376712	0.0643792	0.00014705	28.1855
cg00704909	0.620779	0.00267126	1.71e-13	4.17749e+07
cg00707317	0.53336	1.3524	0.523079	3.4966
cg00708598	0.457719	2.00105	0.320737	12.4844
cg00708642	0.363688	5.86e-07	2.1e-20	1.63966e+07
cg00711916	0.789438	0.106056	7.47e-09	1.50547e+06
cg00712898	0.561002	1.52e-06	3.73e-26	62269300000000
cg00714377	0.516493	1.69083	0.345933	8.2643
cg00717862	0.260116	6.88e-10	7.78e-26	6.08703e+06
cg00718440	0.317643	0.00616141	2.85e-07	133.292
cg00718513	0.660931	1.7997	0.130276	24.8619
cg00718748	0.496267	0.00257338	8.93e-11	74145.9
cg00720072	0.762969	0.0229899	5.17e-13	1022662245
cg00720137	0.333416	1.64438	0.600224	4.50497
cg00720723	0.491451	1.2e-06	1.65e-23	87879955617
cg00722300	0.939195	0.933573	0.159642	5.45947
cg00724662	0.385884	0.000122337	1.75e-13	85321.3
cg00725635	0.17732	8.8887	0.371812	212.498
cg00725777	0.810382	1.18267	0.300367	4.65667
cg00727590	0.678594	1.45716	0.245551	8.64715
cg00728317	0.679644	1.5421	0.197368	12.0489
cg00728602	0.461578	90.7119	0.000557436	1.47616e+07
cg00729275	0.93902	0.944012	0.21573	4.13091
cg00729541	0.506045	0.00742689	3.94e-09	13999.8
cg00729875	0.615037	1.57074	0.27028	9.12846
cg00730260	0.0704492	0.0128417	0.000114662	1.43822
cg00731459	0.385094	2.41e-11	2.62e-35	22054800000000
cg00733682	0.183906	7611.62	0.0143369	4041105277
cg00734993	0.58645	5765.56	1.62e-10	2.04635e+17
cg00736326	0.514971	8.84e-05	5.55e-17	1.40687e+08
cg00737514	0.912349	12.8336	2.36e-19	6.97e+20
cg00739120	0.780472	1.24032	0.272754	5.64021
cg00741717	0.198994	3.34257	0.530103	21.0766
cg00743372	0.217803	7.45e-09	8.84e-22	62860.3
cg00744433	0.224088	2.94411	0.51632	16.7876
cg00745543	0.705093	1.50857	0.179392	12.6861
cg00745735	0.662104	0.622253	0.0741176	5.22411
cg00746083	0.551734	5.37e-06	2.38e-23	1214720000000
cg00746130	0.898486	0.308268	4.34e-09	2.19134e+07
cg00746981	0.827658	0.741771	0.050389	10.9195
cg00747849	0.414209	4.0779	0.13968	119.053
cg00751288	0.192401	3.32e-11	5.8e-27	189469
cg00754617	0.784705	0.438255	0.00117861	162.96
cg00755043	0.898653	1.06889	0.383448	2.97959
cg00756058	0.65739	1.26261	0.450559	3.53822
cg00756887	0.353107	2.59799	0.346304	19.4903
cg00757070	0.931236	0.890477	0.0638805	12.413
cg00757952	0.0704396	4.30566	0.885353	20.9393
cg00761755	0.678123	0.00171185	1.47e-16	19882500718
cg00762512	0.515442	4.06e-05	2.37e-18	6.95443e+08
cg00763679	0.00692096	6.97e-17	1.31e-28	3.71e-05
cg00763889	0.506697	6.56973	0.0253694	1701.31
cg00766729	0.779948	0.138138	1.29e-07	148332
cg00766889	0.53449	0.000180824	2.8e-16	1.16605e+08
cg00767581	0.387554	1.8034	0.473363	6.87054
cg00768439	0.858241	0.892826	0.257349	3.0975
cg00769470	0.724167	0.745824	0.146307	3.80197
cg00769520	0.876756	1.10984	0.297328	4.14275
cg00770279	0.310475	2.64e-15	1.78e-43	39210100000000
cg00770871	0.61629	597724000000	5.2e-35	6.87e+57
cg00772000	0.509861	1.40925	0.508059	3.90895
cg00775197	0.438686	0.603445	0.168056	2.16681
cg00777121	0.305694	0.361775	0.0517039	2.53136
cg00777555	0.580264	1010.07	2.27e-08	44927200000000
cg00778920	0.279528	114.899	0.021187	623102
cg00779924	0.732876	1.21001	0.404916	3.61588
cg00782174	0.567268	1.43e-05	3.61e-22	566663000000
cg00782854	0.611704	0.00096472	2.2e-15	423990776
cg00783759	0.582814	87896607312	7.82e-29	9.88e+49
cg00784357	0.0623246	7.78e-16	1.01e-31	5.99828
cg00791249	0.40528	0.000187952	3.16e-13	111935
cg00792687	0.904874	0.539516	2.17e-05	13404.7
cg00792740	0.672321	0.00051785	3.08e-19	871274000000
cg00792849	0.691854	1.58114	0.164071	15.2373
cg00793774	0.647183	556.262	9.75e-10	317433000000000
cg00795268	0.860523	2.89571	2.05e-05	409699
cg00796728	0.913264	0.291008	6.57e-11	1289523465
cg00798206	0.146867	4.26e-11	4.14e-25	4373.48
cg00800095	0.639574	0.530661	0.0374186	7.5257
cg00804048	0.126303	6.6e-11	5.87e-24	742.566
cg00804392	0.213202	0.278808	0.0373194	2.08294
cg00806490	0.324325	1.97986	0.509041	7.70048
cg00807586	0.988267	1.01262	0.190338	5.38727
cg00808492	0.816474	0.876214	0.287043	2.67469
cg00810495	0.399091	1794.51	4.91e-05	65632445947
cg00811081	0.0680631	1.25e-17	8.64e-36	17.9572
cg00812502	0.409838	229539000000000	1.62e-20	3.25e+48
cg00815440	0.555097	2.14642e+06	2.01e-15	2.29e+27
cg00815583	0.532026	0.0194724	8.4e-08	4512.51
cg00816620	0.681924	2.06623	0.0642547	66.4438
cg00818693	0.168778	3.4011	0.594924	19.4436
cg00818872	0.688301	1.44018	0.242344	8.5586
cg00819310	0.293826	1.95608	0.558925	6.8457
cg00819362	0.193555	102765	0.0028605	3691900000000
cg00819696	0.994673	1.43973	4.89e-47	4.24e+46
cg00821764	0.915928	0.198663	1.85e-14	2136150000000
cg00822607	0.268801	2.05e-06	1.71e-16	24719.2
cg00824109	0.479946	2.86e-13	4.47e-48	1.82e+22
cg00826384	0.777577	1.17035	0.392926	3.48595
cg00827369	0.428296	1.28e-07	1.14e-24	14458551477
cg00828602	0.342769	1.57243	0.61726	4.00568
cg00830029	0.836825	1.14561	0.314209	4.1769
cg00830393	0.17645	9.01914e+08	9.35e-05	8.7e+21
cg00831028	0.330618	1.41e-06	2.31e-18	862954
cg00832517	0.443407	0.00259654	6.35e-10	10623.7
cg00833393	0.910152	3.52707	1.1e-09	11352526139
cg00833777	0.13244	3.79905	0.667632	21.6178
cg00834796	0.34115	0.23794	0.0123767	4.57434
cg00834958	0.868472	0.115046	8.83e-13	14997467544
cg00836605	0.184811	0.00264764	4.11e-07	17.0565
cg00838150	0.692587	0.00197285	7.68e-17	50684050633
cg00839584	0.907102	1.09397	0.242026	4.94483
cg00839802	0.694285	2.31891	0.0349751	153.748
cg00840403	0.456716	1.53922	0.494377	4.79231
cg00840516	0.914004	1.13104	0.121018	10.5708
cg00841581	0.352563	46946064	3.14e-09	7.01e+23
cg00842351	0.8695	1.18007	0.163716	8.50593
cg00846036	0.711005	1.24616	0.389032	3.99177
cg00848394	0.457521	2.81e-05	2.77e-17	2.85229e+07
cg00848397	0.316527	7.36e-10	9.88e-28	5.47938e+08
cg00848728	0.494749	1.87254	0.309312	11.3361
cg00849368	0.23123	5.69078	0.330261	98.0588
cg00850538	0.911013	1.08326	0.26646	4.40384
cg00852964	0.728171	1.32529	0.270756	6.48697
cg00853068	0.769364	1.23636	0.299361	5.10617
cg00854637	0.377751	0.000146576	4.43e-13	48450.7
cg00854995	0.15883	2.25e-10	8.51e-24	5926.39
cg00856375	0.0402545	534.468	1.32204	216072
cg00858899	0.732577	10.0972	1.75e-05	5.81066e+06
cg00859655	0.62444	1.89534	0.146546	24.5133
cg00861635	0.142555	9.05e-11	3.41e-24	2404.08
cg00862290	0.503201	0.369577	0.0200486	6.81278
cg00862770	0.331971	1.46e-11	1.89e-33	113256000000
cg00864867	0.624109	0.0399074	1.01e-07	15715.5
cg00870662	0.926405	0.933435	0.216422	4.02594
cg00871453	0.440198	5.73e-05	9.67e-16	3.38806e+06
cg00873037	0.0331919	642359	2.90411	142083000000
cg00873937	0.80762	15.5105	4.05e-09	59458996073
cg00874863	0.416414	1.63247	0.500618	5.32335
cg00875272	0.0220249	8.75779	1.36709	56.1038
cg00876704	0.670344	3.06e-07	3.08e-37	3.03e+23
cg00877887	0.785623	1.2698	0.227115	7.09943
cg00877964	0.126863	3986.12	0.095031	167199469
cg00881086	0.889227	0.0938809	3.27e-16	26939900000000
cg00881370	0.678157	4.03671	0.00554282	2939.85
cg00882451	0.222801	3.26171	0.487508	21.8227
cg00882832	0.692615	405.928	4.74e-11	3477780000000000
cg00884221	0.964617	1.02795	0.304076	3.47507
cg00884529	0.403835	0.000698854	2.73e-11	17917.9
cg00885506	0.600421	0.000288682	1.64e-17	5069864440
cg00886554	0.704311	1.47296	0.199328	10.8846
cg00887101	0.752742	12.877	1.6e-06	1.0343e+08
cg00887547	0.371816	0.000107223	2.08e-13	55245.1
cg00887700	0.906639	0.0608773	2.95e-22	1.25468e+19
cg00888007	0.418616	2.3615	0.294354	18.9455
cg00888479	0.778158	0.829825	0.226655	3.03814
cg00888561	0.0527141	10189.2	0.897463	1.15682e+08
cg00890257	0.000346365	3.28658e+06	884.891	12206678164
cg00891278	0.204773	3.49519	0.505205	24.1811
cg00891541	0.14358	0.244753	0.0371179	1.61389
cg00892393	0.0756683	4.31876	0.85969	21.6959
cg00892798	0.819854	1.13669	0.377366	3.4239
cg00893242	0.146756	5.68623	0.543616	59.478
cg00893636	0.945954	1.04986	0.257105	4.28703
cg00893987	0.697983	3.08619	0.010409	915.034
cg00895324	0.588113	1.38233	0.428283	4.46165
cg00897329	0.183837	2.14e-09	3.52e-22	13046.6
cg00899086	0.611242	0.00770784	5.48e-11	1.08324e+06
cg00899641	0.893959	0.035863	2.01e-23	6.40985e+19
cg00901493	0.158243	1040.32	0.0670123	1.61502e+07
cg00901652	0.843945	5.85056	1.34e-07	2.54639e+08
cg00901683	0.218619	1.3e-14	9.8e-37	1.7261e+08
cg00901704	0.146733	1.38e-10	6.62e-24	2866.28
cg00901766	0.388439	1814.42	7.13e-05	46172529524
cg00903242	0.750676	0.832241	0.268115	2.58331
cg00904483	0.55893	3.84536	0.0420029	352.042
cg00904574	0.450013	3.88636e+06	3.11e-11	4.86e+23
cg00905170	0.0179947	1.36e-22	1.04e-40	0.000177553
cg00906183	0.880906	9.86787	9.72e-13	100173000000000
cg00908551	0.600173	3.57966	0.030399	421.526
cg00910067	0.205732	2.26936	0.63774	8.07538
cg00910168	0.223523	3.21309	0.490538	21.0462
cg00911873	0.38694	52.0429	0.00673207	402323
cg00912191	0.338297	17.813	0.0490484	6469.21
cg00912942	0.165592	0.0368076	0.00034574	3.91856
cg00915289	0.852057	0.053525	2.32e-15	1232550000000
cg00916199	0.808019	0.0137093	1.29e-17	14602100000000
cg00916635	0.684095	0.759353	0.201622	2.8599
cg00917893	0.97216	2.13202	7.31e-19	6.22126e+18
cg00918794	0.406887	15996.1	1.86e-06	137642000000000
cg00920960	0.413245	0.394277	0.0424186	3.66477
cg00922727	0.0221861	3.14e-11	3.14e-20	0.0314418
cg00925717	0.38405	2.41999	0.330827	17.7022
cg00929855	0.248369	0.558356	0.207579	1.5019
cg00930078	0.245337	2.45e-16	1.13e-42	53206615049
cg00930194	0.633873	1.30358	0.437856	3.88101
cg00930873	0.376711	1.64256	0.54659	4.93607
cg00932276	0.737484	0.810806	0.237859	2.76385
cg00933411	0.609966	2.02618	0.134392	30.5481
cg00935388	0.0276069	695.349	2.05757	234991
cg00935430	0.310212	3.33e-06	8.77e-17	126450
cg00936626	0.205144	4.35618	0.447174	42.4361
cg00940278	0.0577612	1.53423e+07	0.580057	405799000000000
cg00940891	0.916579	0.0254713	3.8e-32	1.71e+28
cg00941229	0.203231	6.06e-22	1.26e-54	291987000000
cg00943245	0.161434	4.06995	0.570612	29.0294
cg00943950	0.509507	0.000328663	1.47e-14	7.36108e+06
cg00945507	0.121896	28.9265	0.407147	2055.13
cg00945862	0.536259	0.479403	0.0466488	4.92676
cg00947019	0.410496	453.231	0.000214038	9.59725e+08
cg00947275	0.382983	0.529024	0.126542	2.21164
cg00948524	0.408024	3.15389	0.207555	47.9249
cg00950418	0.983604	0.795422	2.63e-10	2403229713
cg00950621	0.462198	1.34e-07	6.4e-26	280716000000
cg00951770	0.525871	3.27781	0.0836569	128.43
cg00953256	0.954469	0.941854	0.12048	7.36296
cg00953277	0.454712	1.66e-10	3.82e-36	7230290000000000
cg00954003	0.500531	1.22e-17	7.6e-67	1.97e+32
cg00954566	0.107455	2.38719e+08	0.01504	3.78901e+18
cg00955230	0.433719	5.47e-06	3.66e-19	8.17665e+07
cg00955451	0.777721	1.2066	0.327536	4.44497
cg00958517	0.233801	4.67e-12	1.04e-30	2.0957e+07
cg00958560	0.620748	0.65084	0.118743	3.56731
cg00960702	0.793488	0.00638548	2.36e-19	172833000000000
cg00962459	0.48621	1.84704	0.32843	10.3875
cg00962635	0.740487	1.28725	0.288878	5.73606
cg00964109	0.486958	1.55727e+08	1.24e-15	1.95e+31
cg00967316	0.294554	0.538758	0.169487	1.71258
cg00968475	0.736524	0.815485	0.248537	2.67572
cg00969271	0.538787	0.344872	0.0115707	10.2791
cg00969446	0.638154	1.6594	0.201034	13.6972
cg00970325	0.549182	1.44482	0.433394	4.81663
cg00971396	0.167591	6214.37	0.0254515	1517334264
cg00973286	0.592505	48225.6	3.41e-13	6.82e+21
cg00973334	0.246406	3.03e-09	1.19e-23	768815
cg00973677	0.694166	1.33577	0.315513	5.65518
cg00974864	0.386589	2.01792	0.411805	9.88813
cg00977690	0.477914	232.443	6.78e-05	7.97397e+08
cg00979348	0.776506	0.115258	3.83e-08	346901
cg00980978	0.294936	2.32183	0.479994	11.2311
cg00981643	0.81566	0.810284	0.138209	4.75047
cg00983520	0.478657	2.3007	0.229496	23.0646
cg00983899	0.177738	0.226157	0.0260352	1.96452
cg00984602	0.550455	0.0471209	2.08e-06	1067.85
cg00986320	0.56746	0.022228	4.79e-08	10310.6
cg00987015	0.933739	0.901557	0.0783435	10.3749
cg00987379	0.774668	10.5305	1.05e-06	1.0534e+08
cg00995065	0.699108	0.804826	0.267634	2.42026
cg00995327	0.511274	1.47677	0.461433	4.72623
cg00995520	0.46066	2.09487	0.293738	14.94
cg00997424	0.0683024	1.55e-14	2.2e-29	10.9027
cg01001286	0.478642	0.648969	0.196228	2.14629
cg01007201	0.372172	3.2192	0.246947	41.9655
cg01009664	0.610061	2.13506	0.115725	39.3907
cg01015871	0.805982	0.825142	0.178006	3.82491
cg01015879	0.410662	1.63445	0.507062	5.26847
cg01017147	0.176234	2.50672	0.66179	9.49494
cg01021485	0.811173	20.5768	3.46e-10	1224330000000
cg01025762	0.866657	0.207857	2.26e-09	1.91188e+07
cg01025842	0.388497	4.29e-06	2.72e-18	6.78141e+06
cg01026744	0.202681	3.15807	0.53835	18.5258
cg01027739	0.378205	1.90875	0.453224	8.03868
cg01027805	0.0853388	1.31e-10	7.19e-22	23.7434
cg01029592	0.397948	0.430818	0.0611415	3.03564
cg01031251	0.655457	1.65959	0.179317	15.3595
cg01031400	0.0254595	5.71e-06	1.44e-10	0.227046
cg01033160	0.0838973	1.58e-10	1.21e-21	20.5388
cg01033938	0.196087	2.32723	0.646667	8.37525
cg01035238	0.28858	0.315072	0.0373289	2.65935
cg01035422	0.744473	0.425897	0.00251297	72.1809
cg01036148	0.900462	0.355832	3.31e-08	3.83031e+06
cg01036173	0.713258	0.000868841	4.1e-20	18408500000000
cg01036779	0.0386011	218.791	1.32645	36088.5
cg01037108	0.647297	0.0129307	1.05e-10	1.58935e+06
cg01040062	0.821093	4.63609	7.81e-06	2.75249e+06
cg01040759	0.426577	0.00028734	5.34e-13	154541
cg01040850	0.0406889	7.19953	1.08724	47.6742
cg01041367	0.369252	0.021876	5.2e-06	91.9682
cg01043831	0.517833	0.39762	0.0242968	6.5071
cg01044662	0.241462	4.2019	0.380414	46.4126
cg01044722	0.27221	3.44897	0.378343	31.4408
cg01045423	0.939856	1.53198	2.36e-05	99426.7
cg01046174	0.424025	8.3e-05	8.21e-15	839178
cg01047414	0.501521	84.1942	0.000204554	3.46543e+07
cg01048931	0.799313	9091.01	2.76e-27	3e+34
cg01049530	0.719337	0.845861	0.339445	2.1078
cg01053621	0.194851	2.78867	0.591566	13.1459
cg01055695	0.452456	0.581932	0.141743	2.38915
cg01056155	0.181952	1.9e-06	7.57e-15	478.047
cg01056568	0.764543	0.735599	0.098624	5.48655
cg01057962	0.935062	1.93369	2.5e-07	1.49794e+07
cg01058368	0.546511	1.52314	0.387943	5.98015
cg01062029	0.287807	2.18731	0.516595	9.26123
cg01063524	0.852555	9.35041	5.41e-10	161662000000
cg01063813	0.0599543	2.01e-08	1.93e-16	2.10145
cg01064307	0.0665588	3.67e-11	2.6e-22	5.16249
cg01064957	0.558144	0.0149185	1.15e-08	19325.7
cg01065920	0.445264	1.28e-06	9.37e-22	1737588573
cg01069256	0.712578	0.402684	0.00318619	50.8928
cg01071811	0.896145	0.89799	0.178498	4.51761
cg01072821	0.0298918	8.02742	1.22497	52.6048
cg01076838	0.414548	5.28594	0.096842	288.523
cg01078434	0.481485	2.03121	0.282391	14.6103
cg01078871	0.905879	0.107838	9.99e-18	1164090000000000
cg01079126	0.24905	0.395748	0.0818229	1.91409
cg01080862	0.158762	0.441636	0.141717	1.37627
cg01081263	0.83386	1.37483	0.0702136	26.9202
cg01086868	0.0782775	0.423277	0.162558	1.10215
cg01086895	0.25619	1.685	0.684623	4.14712
cg01086978	0.0413558	1.99e-09	8.71e-18	0.455898
cg01087382	0.420013	0.184526	0.00303532	11.2179
cg01087710	0.859219	0.258638	8.37e-08	799041
cg01090445	0.126596	6.82796e+06	0.0116416	4004690000000000
cg01091448	0.924204	0.0596423	3.56e-27	1e+24
cg01091565	0.526431	0.366392	0.0163973	8.18687
cg01092036	0.461195	32.9612	0.00302271	359426
cg01092561	0.13089	94.6697	0.258303	34697.1
cg01095395	0.0910772	161.738	0.443373	59000.7
cg01095590	0.705651	0.000217005	2.12e-23	2223840000000000
cg01097940	0.109696	3.76e-11	6.34e-24	223.252
cg01100796	0.284448	7.90287	0.179416	348.104
cg01103730	0.316168	0.184317	0.00675293	5.03081
cg01103836	0.775262	0.146887	2.81e-07	76856.7
cg01106788	0.69496	0.0331629	1.34e-09	821743
cg01107031	0.687997	1.55148	0.181875	13.2348
cg01107741	0.892235	0.22391	8.86e-11	5.65791e+08
cg01108476	0.433896	2.10653	0.325953	13.6138
cg01109219	0.303434	2.3014	0.470503	11.2569
cg01110312	0.685879	1.48868	0.216477	10.2375
cg01110846	0.982671	0.531516	9.06e-26	3.12e+24
cg01112452	0.152864	4.63	0.566248	37.8577
cg01112778	0.0886346	3.1769	0.839716	12.0192
cg01114088	0.620144	0.802771	0.336754	1.91368
cg01116966	0.634102	2.86027	0.0377541	216.695
cg01117627	0.506353	3.95982	0.0683729	229.333
cg01119135	0.981272	1.02871	0.0968236	10.9296
cg01120165	0.0155607	40.3928	2.01767	808.646
cg01120307	0.53845	41.4149	0.000291552	5.88299e+06
cg01120308	0.357379	5.05393	0.160407	159.234
cg01120898	0.36298	2.34e-09	5.97e-28	9196374558
cg01124420	0.985599	0.974391	0.0582546	16.2981
cg01124961	0.132167	9.15e-20	1.51e-44	556277
cg01125463	0.225436	7.48901	0.2888	194.201
cg01126560	0.607625	2.86075	0.0517653	158.096
cg01127428	0.806142	4.40632	3.16e-05	613832
cg01129459	0.278018	2.0849	0.552799	7.8633
cg01129847	0.751909	0.713022	0.0875678	5.8058
cg01130192	0.341755	0.00233498	8.77e-09	622.028
cg01131735	0.951814	1.22155	0.00185388	804.891
cg01134491	0.442028	1.98e-05	2.03e-17	1.93697e+07
cg01135200	0.789225	3.65296	0.000273746	48746.3
cg01135626	0.629189	1.95676	0.12829	29.8457
cg01136458	0.415347	2.03523	0.368131	11.2519
cg01137065	0.807379	0.10621	1.58e-09	7.15802e+06
cg01137532	0.760381	1.15434	0.458924	2.90354
cg01137708	0.0859047	1.66e-21	3.19e-45	860.89
cg01137737	0.761902	0.0662617	1.57e-09	2.79494e+06
cg01138020	0.514825	1.65306	0.364277	7.50148
cg01139059	0.488894	0.000765027	1.14e-12	511936
cg01139966	0.445544	3.45e-07	8.66e-24	13790699489
cg01140782	0.206787	0.462363	0.139594	1.53144
cg01143454	0.336687	2.032	0.478339	8.63201
cg01144286	0.418364	1.64367	0.493321	5.47646
cg01145389	0.534123	198.951	1.13e-05	3511209887
cg01145396	0.934804	1.11057	0.0900035	13.7036
cg01146980	0.612774	4.73e-09	2.74e-41	8.19e+23
cg01148741	0.0317094	7.46864	1.19252	46.7756
cg01150454	0.479206	2.23e-11	6.95e-41	7.14049e+18
cg01151686	0.990926	2.00225	2.17e-52	1.85e+52
cg01151699	0.948659	0.967806	0.35745	2.62037
cg01152019	0.444176	0.579956	0.143658	2.34131
cg01152499	0.840353	0.134019	4.31e-10	4.16413e+07
cg01154193	0.584368	0.010456	8.37e-10	130615
cg01154537	0.0941272	177.671	0.412793	76471.5
cg01154775	0.346709	1.89752e+06	1.59e-07	2.26379e+19
cg01155039	0.731741	1.31988	0.270026	6.4515
cg01160766	0.959194	1.83103	1.58e-10	21167851170
cg01161216	0.847546	0.0450389	8.46e-16	2398930000000
cg01161597	0.682661	810.011	9.23e-12	7.11038e+16
cg01166674	0.00891308	7.45e-15	1.92e-25	0.000288089
cg01168201	0.355166	2.02652	0.453433	9.05706
cg01169610	0.336384	169.697	0.00482864	5.96378e+06
cg01169624	0.135655	0.241047	0.0371955	1.56211
cg01169726	0.142631	2.84405	0.703192	11.5027
cg01169778	0.097402	5.78625	0.725973	46.1184
cg01171588	0.720693	0.00745642	1.62e-14	3428803515
cg01171858	0.678108	28.6343	3.78e-06	2.1712e+08
cg01172484	0.183118	0.478251	0.16144	1.41678
cg01172656	0.763809	523.574	9.64e-16	2.85e+20
cg01172735	0.758017	1.59376	0.0821594	30.9164
cg01172899	0.755428	0.632082	0.0352531	11.3331
cg01172972	0.909113	1.57375	0.000654254	3785.54
cg01173291	0.185363	2302749123	3.22e-05	1.65e+23
cg01176271	0.813893	7.75e-05	4.64e-39	1.3e+30
cg01177524	0.146648	7.58e-16	2.89e-36	198235
cg01177956	0.351195	4.53e-11	8.11e-33	252760000000
cg01182585	0.0153266	2758930449	64.4273	1.18144e+17
cg01182697	0.700781	1.30547	0.335187	5.08452
cg01182873	0.636992	3.16738	0.026373	380.4
cg01183669	0.842777	24.5351	4.53e-13	1328210000000000
cg01184449	0.95111	0.954865	0.218154	4.17947
cg01184522	0.154336	4.17477	0.584299	29.8283
cg01185080	0.972304	1.03661	0.136165	7.89159
cg01185754	0.161139	9.32884	0.410494	212.006
cg01186777	0.163756	54.4048	0.196242	15082.8
cg01190915	0.389968	0.00626834	5.96e-08	659.779
cg01191395	0.310461	7.84e-05	9.12e-13	6735.56
cg01192900	0.737681	1.30592	0.273896	6.22652
cg01192952	0.98987	1.01053	0.200618	5.0901
cg01193293	0.156211	2.64446	0.68953	10.1419
cg01194444	0.860355	1.9164	0.00136545	2689.67
cg01195014	0.285064	0.46515	0.114326	1.89252
cg01195053	0.518926	23.5044	0.00160192	344871
cg01195127	0.878921	6.74135	1.47e-10	310001000000
cg01197831	0.604784	3.21373	0.038628	267.372
cg01199721	0.0360796	2.75e-11	3.68e-21	0.206291
cg01200060	0.554363	1.56342	0.355392	6.8777
cg01200177	0.912452	0.769677	0.00723731	81.8541
cg01204271	0.297176	4.24e-17	6.99e-48	256525000000000
cg01206472	0.962997	0.453872	1.46e-15	141340000000000
cg01206970	0.306388	2.68412	0.404692	17.8023
cg01211097	0.0667468	5.39516	0.890138	32.7003
cg01214321	0.44037	1.92e-07	1.65e-24	22203731394
cg01214847	0.886018	1.12851	0.216074	5.89398
cg01216369	0.412184	2.43131	0.290848	20.3243
cg01220033	0.311931	4.22e-06	1.61e-16	110460
cg01221484	0.777864	16810.2	7.37e-26	3.83e+33
cg01221637	0.598642	9795	1.35e-11	7.11421e+18
cg01222684	0.049142	1580.07	1.02807	2.42847e+06
cg01226811	0.31415	1.9039	0.5434	6.67066
cg01226883	0.693438	338.705	8.94e-11	1283250000000000
cg01228636	0.348507	8.27e-06	1.96e-16	349318
cg01228667	0.757613	1.19822	0.379988	3.77835
cg01230160	0.194428	1.76e-07	1.1e-17	2808.26
cg01231779	0.182105	2.07858	0.709573	6.08888
cg01234063	0.201931	0.541437	0.211006	1.38932
cg01234133	0.665036	1.37792	0.322841	5.8811
cg01236137	0.335815	9.88e-06	6.33e-16	154021
cg01240931	0.00124366	0.0578151	0.0102456	0.326244
cg01241375	0.770882	13.4156	3.46e-07	5.20725e+08
cg01241836	0.159627	0.366697	0.0905929	1.4843
cg01242619	0.67683	2.84454	0.0208463	388.146
cg01243790	0.0687472	2.36071e+07	0.271224	2054740000000000
cg01244871	0.548175	9.74e-06	4.29e-22	221321000000
cg01245595	0.0895726	4.95e-23	8.76e-49	2795.48
cg01246254	0.793517	2.46029	0.0029058	2083.09
cg01246405	0.784548	0.252345	1.3e-05	4887.06
cg01252496	0.0282335	8.09487	1.24994	52.424
cg01253107	0.078204	1.33e-15	3.71e-32	47.7333
cg01253545	0.627258	4.77821	0.00866117	2636.05
cg01254459	0.0748493	6.97e-19	7.35e-39	66.0896
cg01254505	0.340826	3.18239	0.293949	34.4537
cg01255349	0.688477	0.026578	5.28e-10	1.338e+06
cg01255591	0.559832	2.8649	0.0832942	98.5379
cg01257202	0.719617	0.713937	0.113409	4.49439
cg01259619	0.150321	3.50399	0.634658	19.3457
cg01260219	0.113466	5.28054	0.672662	41.4534
cg01261503	0.5959	0.0912344	1.31e-05	635.808
cg01261535	0.13381	1.67e-16	3.93e-37	70590.6
cg01262913	0.459926	2.98156	0.164467	54.0518
cg01263716	0.627799	5.25e-08	1.95e-37	1.41e+22
cg01264826	0.771307	0.0224312	1.7e-13	2958406814
cg01265637	0.342066	42.0432	0.0187992	94026.7
cg01267315	0.415772	2.88272	0.225102	36.917
cg01269048	0.843175	2.45378	0.000337037	17864.6
cg01269795	0.00311549	12.6871	2.35401	68.3783
cg01272601	0.588658	2.6783e+06	1.35e-17	5.3e+29
cg01273150	0.67312	0.000227054	2.67e-21	19284200000000
cg01274324	0.442437	0.228263	0.00526405	9.89809
cg01275830	0.357536	0.00363928	2.32e-08	570.973
cg01277844	0.989365	1.10579	4.18e-07	2.92268e+06
cg01278291	0.607143	2.2156	0.106777	45.9731
cg01278696	0.709588	1468.24	3.16e-14	6.81408e+19
cg01280080	0.564286	3.58004	0.0468552	273.538
cg01281797	0.78227	4.36125	0.000126903	149882
cg01281904	0.944535	1.0631	0.189657	5.95904
cg01282074	0.280276	5.66584	0.243149	132.025
cg01283289	0.406736	2.21856	0.337688	14.5756
cg01284306	0.00529962	225.255	4.999	10150
cg01284619	0.732365	1.46357	0.164965	12.9848
cg01288598	0.748368	2.16927	0.019121	246.104
cg01289103	0.869499	1.20221	0.133616	10.8169
cg01291404	0.941989	0.963178	0.350639	2.64577
cg01292265	0.643203	0.0574465	3.23e-07	10208.9
cg01293647	0.238293	2.66232	0.52296	13.5535
cg01294695	0.0454453	9.66251	1.04704	89.1692
cg01294702	0.206937	2.1596	0.653258	7.13939
cg01295203	0.214575	2.2914	0.61861	8.48758
cg01297972	0.853602	3.32882	9.43e-06	1.1746e+06
cg01299496	0.712771	0.00452119	1.49e-15	13762033028
cg01301664	0.612159	1.4712	0.330733	6.54434
cg01302245	0.919441	1.10595	0.157112	7.78502
cg01305421	0.994923	0.993057	0.116138	8.49132
cg01305547	0.613075	3.92352	0.0196197	784.62
cg01305625	0.643462	0.559665	0.0479236	6.53593
cg01306510	0.535715	2.28e-06	3.18e-24	1635210000000
cg01307730	0.738463	0.544318	0.0153208	19.3386
cg01308501	0.957374	0.927196	0.0579915	14.8244
cg01309153	0.77231	1.33894	0.185407	9.66939
cg01309671	0.284342	0.399574	0.0745156	2.14264
cg01311051	0.869415	1.76713	0.00199239	1567.34
cg01311285	0.483466	0.462448	0.0534867	3.99834
cg01313514	0.988894	0.991145	0.283299	3.4676
cg01313949	0.624931	0.00494949	2.83e-12	8.65736e+06
cg01313966	0.821642	0.181703	6.61e-08	499591
cg01316516	0.30072	112400	3.06e-05	413363000000000
cg01316819	0.91554	1.08208	0.251848	4.64919
cg01318557	0.403285	5.02746	0.113924	221.862
cg01320040	0.414751	0.000201528	2.65e-13	153385
cg01320361	0.42109	2.57e-09	3.03e-30	2175280000000
cg01320507	0.36342	401.703	0.000974109	1.65654e+08
cg01322897	0.758577	0.00442779	4.32e-18	4533340000000
cg01324261	0.904743	0.895258	0.146207	5.48185
cg01328164	0.104402	1.84e-11	2.02e-24	166.707
cg01331554	0.511169	3.73e-15	3.38e-58	4.11e+28
cg01333011	0.0959858	5.69446	0.734466	44.1502
cg01333131	0.0359207	467.841	1.49785	146127
cg01333619	0.38411	3.37e-07	8.99e-22	1.26605e+08
cg01333788	0.569566	1.52251	0.357584	6.48247
cg01334437	0.261889	1.13e-07	8.23e-20	154705
cg01335367	0.48809	0.524527	0.0846465	3.25033
cg01337047	0.320425	2.28291	0.448051	11.6319
cg01340005	0.704496	1.44295	0.216899	9.59944
cg01342792	0.644267	0.486636	0.0228808	10.3499
cg01343729	0.395145	1.1e-07	1.01e-23	1203383375
cg01344171	0.967592	0.973562	0.267306	3.54584
cg01344452	0.0841062	13.5164	0.704217	259.426
cg01344518	0.0194507	11.8585	1.49002	94.3767
cg01346152	0.618456	0.0311767	3.69e-08	26372.7
cg01346589	0.104502	1.08e-06	6.8e-14	17.2471
cg01346718	0.783042	0.6469	0.0291336	14.3642
cg01347719	0.785509	0.130092	5.44e-08	311385
cg01348086	0.955661	1.07654	0.0799688	14.4924
cg01348757	0.215527	2.085	0.651801	6.66957
cg01351032	0.997605	0.997272	0.167531	5.9365
cg01352108	0.501972	0.611274	0.145279	2.57199
cg01352882	0.283597	8.05e-24	4.93e-66	1.3141e+19
cg01353347	0.322337	0.595478	0.213306	1.66237
cg01353448	0.367688	0.41862	0.0629485	2.7839
cg01354473	0.584727	0.631022	0.121036	3.28983
cg01355520	0.445117	0.000693779	5.41e-12	88961.1
cg01355739	0.814683	1.45915	0.06193	34.3793
cg01356829	0.545618	1.46104	0.427209	4.99667
cg01357116	0.324508	5.38096	0.189207	153.032
cg01357263	0.899028	31.8117	1.96e-22	5.15e+24
cg01360325	0.370488	2.88e-07	1.39e-21	5.95112e+07
cg01360768	0.753274	124.67	1.07e-11	1458200000000000
cg01361446	0.265297	2.29482	0.53214	9.89629
cg01362183	0.143717	149.618	0.181704	123198
cg01366407	0.425111	0.00250046	1.01e-09	6195.07
cg01366419	0.965304	1.04448	0.146991	7.42179
cg01367992	0.431273	1.77213	0.426234	7.36788
cg01369413	0.520346	1.54839	0.408253	5.87258
cg01371258	0.624654	0.000158589	9.52e-20	264071000000
cg01371477	0.148324	0.00114936	1.19e-07	11.1243
cg01372605	0.846899	0.00464779	9.71e-27	2.23e+21
cg01372689	0.852808	0.225844	3.37e-08	1.51369e+06
cg01373706	0.941881	0.810088	0.00281547	233.085
cg01375994	0.225477	5.7659	0.339264	97.9934
cg01376672	0.00394937	1.33e-21	8.43e-36	2.09e-07
cg01377911	0.633803	0.684146	0.143518	3.26131
cg01381846	0.541461	0.679757	0.196894	2.3468
cg01385430	0.321377	11152600000000	1.82e-13	6.85e+38
cg01386493	0.72056	0.747772	0.152099	3.6763
cg01389761	0.827708	2.04382	0.00327167	1276.77
cg01390445	0.841814	0.893744	0.296544	2.69362
cg01395672	0.417626	0.0151141	5.98e-07	381.746
cg01399317	0.409866	2.99921	0.220079	40.8729
cg01400401	0.577684	1.3172	0.499399	3.47422
cg01401376	0.000591645	9.07368	2.57841	31.9312
cg01402045	0.632575	232.517	4.63e-08	1168340000000
cg01402255	0.773986	0.753132	0.108764	5.21501
cg01403114	0.709331	3.93015	0.00294421	5246.27
cg01404197	0.336655	27883.3	2.38e-05	32626700000000
cg01404615	0.754298	0.825978	0.249457	2.73489
cg01405107	0.569652	1.31534	0.511316	3.38365
cg01405761	0.805864	1.20225	0.276715	5.22347
cg01407244	0.4367	1.45335	0.566504	3.72855
cg01407341	0.273809	11.3454	0.146427	879.066
cg01407797	0.18209	353478	0.00250388	49901200000000
cg01408383	0.214104	0.387316	0.0867343	1.72958
cg01408558	0.166553	5.29854	0.499074	56.2532
cg01409734	0.402751	395952	3.06e-08	5.1263e+18
cg01410472	0.651899	0.603534	0.0672879	5.41335
cg01411954	0.50529	0.0069941	3.19e-09	15333.6
cg01412445	0.448892	3.35e-06	2.26e-20	4.95952e+08
cg01413314	0.717178	745.079	2.14e-13	2.58848e+18
cg01413516	0.368517	0.313783	0.0250906	3.92416
cg01414934	0.472124	0.100555	0.000191908	52.6878
cg01418124	0.749667	1.80588	0.0478585	68.1427
cg01419479	0.0296145	31.4036	1.40647	701.176
cg01419675	0.0474974	1.5e-08	2.75e-16	0.819695
cg01419679	0.518061	0.00686426	1.89e-09	24943
cg01419788	0.470224	5.82e-07	6.94e-24	48793195161
cg01420388	0.728402	1.35373	0.244986	7.48034
cg01422136	0.895609	18.2107	2.72e-18	1.22e+20
cg01424107	0.486855	0.0038681	6.13e-10	24425.4
cg01425405	0.38613	3.85686	0.18216	81.6607
cg01425670	0.856342	0.873677	0.20248	3.76981
cg01426743	0.208229	2.34041	0.622502	8.79922
cg01427567	0.747323	0.375164	0.00096372	146.046
cg01428361	0.967042	0.272248	4.29e-28	1.73e+26
cg01428678	0.0566321	3245.1	0.795889	1.32314e+07
cg01429181	0.701186	0.00275953	2.34e-16	32547685179
cg01429321	0.421622	1.62758	0.496137	5.33931
cg01429391	0.070179	4.06251	0.89091	18.5249
cg01430430	0.124032	3.01991	0.738477	12.3495
cg01430807	0.392009	20.2192	0.0206973	19752.1
cg01431114	0.908643	1.07303	0.321914	3.57672
cg01437411	0.565432	0.415213	0.0207313	8.31601
cg01438829	0.73867	0.107783	2.23e-07	52028.7
cg01439669	0.172628	6.28e-22	2.13e-52	1853198101
cg01439983	0.275773	0.0318237	6.46e-05	15.6797
cg01441777	0.728659	0.561622	0.0215703	14.6228
cg01442481	0.737268	0.0134768	1.59e-13	1140938892
cg01442799	0.232817	7.12e-09	2.95e-22	172305
cg01442833	0.679871	0.244203	0.00030177	197.619
cg01443067	0.151581	4.91e-22	3.69e-51	6.54991e+07
cg01443452	0.876681	1.28427	0.0544842	30.2721
cg01446393	0.843202	1.34986	0.06907	26.3806
cg01446692	0.910799	0.935276	0.290091	3.0154
cg01446983	0.556406	2.54e-17	1.27e-72	5.06e+38
cg01447498	0.144655	3.42213e+07	0.0025748	4.54829e+17
cg01449415	0.150818	1.74e-06	2.42e-14	125.234
cg01454004	0.767487	36.1722	1.69e-09	774245000000
cg01457080	0.91742	2.73281	1.52e-08	4.89753e+08
cg01457653	0.618811	0.00477341	3.43e-12	6.64824e+06
cg01459162	0.929242	1.11858	0.0942958	13.2691
cg01459453	0.305619	2.06031	0.516804	8.21369
cg01461641	0.757046	96.6145	2.56e-11	364131000000000
cg01462829	0.275126	1.83e-06	9.14e-17	36811
cg01462904	0.719026	0.0071115	1.41e-14	3584127041
cg01464985	0.414648	1.8067	0.436185	7.48346
cg01465325	0.104796	80260.1	0.0951081	67730077342
cg01465620	0.973396	1.42991	1.07e-09	1918367885
cg01465641	0.0397381	4.71e-20	1.79e-38	0.123915
cg01466075	0.602324	1.61e-05	1.5e-23	17257200000000
cg01468621	0.458236	1.41315	0.566683	3.52401
cg01468868	0.264227	1525.54	0.00393416	5.91556e+08
cg01469547	0.411521	1.64963	0.49953	5.44768
cg01470283	0.611399	0.00393036	2.06e-12	7.48461e+06
cg01471384	0.836899	1.16013	0.282074	4.77143
cg01471713	0.592613	1.40365	0.405351	4.86057
cg01472101	0.403939	2.08487	0.371332	11.7057
cg01473816	0.379178	0.640103	0.236829	1.73008
cg01476044	0.39636	2.72118	0.269202	27.5066
cg01478450	0.915047	0.468818	4.23e-07	519683
cg01479232	0.673063	1.80718	0.115669	28.2348
cg01481441	0.857719	0.0367934	7.69e-18	176008000000000
cg01482279	0.315672	2.18e-06	1.9e-17	249954
cg01483882	0.336407	2.38e-23	1.78e-69	3.19e+23
cg01484156	0.169726	2.36749	0.691868	8.10126
cg01485645	0.666258	12.5607	0.000127241	1.23994e+06
cg01485797	0.10834	420.488	0.263705	670487
cg01485998	0.503143	0.549829	0.0954556	3.16704
cg01488147	0.466361	7.86603	0.0305856	2022.99
cg01489608	0.735753	10.6825	1.13e-05	1.00644e+07
cg01491225	0.143041	16799677658	0.00034768	8.12e+23
cg01491540	0.801912	0.009157	1.09e-18	76863200000000
cg01492649	0.690971	357.811	9.19e-11	1392630000000000
cg01493303	0.40241	1.02e-16	3.75e-54	2.76e+21
cg01493517	0.508443	2.39311	0.18019	31.783
cg01494593	0.627682	0.469635	0.0221446	9.95984
cg01495509	0.846472	1.17066	0.237537	5.76938
cg01497501	0.526186	9.93e-14	6.14e-54	1.6e+27
cg01497527	0.975847	1.02851	0.166672	6.34679
cg01497576	0.676752	0.765165	0.217397	2.69312
cg01498098	0.612092	2.29762	0.0922345	57.2352
cg01500097	0.173592	3.90203	0.549063	27.7306
cg01500140	0.955261	1.08758	0.0578957	20.4304
cg01500421	0.877552	13.7211	4.66e-14	4037270000000000
cg01500567	0.795319	0.0116809	2.93e-17	4662430000000
cg01505176	0.41872	1.55e-20	1.51e-68	1.6e+28
cg01505590	0.0607491	2.51e-30	2.9e-61	21.6828
cg01507173	0.769991	0.787755	0.159172	3.89866
cg01508386	0.143339	3.26e-05	3.19e-11	33.2878
cg01510051	0.901925	0.878624	0.112202	6.88029
cg01511567	0.185948	4.2903	0.495731	37.1303
cg01512854	0.976716	0.964923	0.0877214	10.614
cg01513611	0.50715	1.79e-05	1.66e-19	1917669700
cg01513661	0.816309	0.0679247	9.49e-12	486028645
cg01514487	0.886557	1.14878	0.170873	7.72325
cg01515426	0.366583	8.1725e+06	8.08e-09	8.27e+21
cg01517033	0.246886	3.065	0.460351	20.4066
cg01519742	0.572511	0.738544	0.257786	2.11589
cg01520924	0.048018	28.9703	1.0298	814.995
cg01522721	0.71287	6067.22	4.32e-17	8.53e+23
cg01522975	0.651562	0.00495003	4.89e-13	5.01495e+07
cg01525376	0.144534	6.82717	0.517179	90.124
cg01526089	0.848987	1.43369	0.0351563	58.4665
cg01530101	0.85461	1.10181	0.390581	3.10817
cg01531431	0.226308	0.19385	0.0135903	2.76506
cg01532080	0.526799	10.3112	0.00750398	14168.7
cg01533387	0.0715542	2.88e-10	1.21e-20	6.86556
cg01535453	0.950947	0.471109	1.81e-11	12233669032
cg01536980	0.88236	2.43504	1.85e-05	320452
cg01538982	0.44844	0.000452528	1.02e-12	200883
cg01539186	0.242193	6.40741	0.284963	144.071
cg01541443	0.740455	9.5482	1.52e-05	5.99772e+06
cg01541629	0.160189	1.82e-23	3.34e-55	9.88728e+08
cg01543654	0.432825	1.54828	0.519344	4.61578
cg01545079	0.0738282	5.2643	0.852081	32.5237
cg01545242	0.414983	2.24e-10	1.4e-33	35722200000000
cg01546430	0.564152	1.93522	0.205225	18.2485
cg01546563	0.436947	1.86231	0.3883	8.93177
cg01550148	0.814958	0.682027	0.0276658	16.8136
cg01555431	0.783176	1.15642	0.410748	3.2558
cg01556075	0.558031	3.7681	0.0445078	319.013
cg01557297	0.346029	1.55299	0.621658	3.87957
cg01557667	0.07269	6.65e-19	9.38e-39	47.105
cg01557989	0.90813	0.928787	0.264843	3.2572
cg01558777	0.462454	1.70056	0.412602	7.00897
cg01560871	0.550121	2.39587	0.136421	42.0769
cg01561916	0.539415	1.54088	0.38734	6.12978
cg01564343	0.0901141	8.34282	0.717549	97.0006
cg01565918	0.967525	0.945725	0.0644239	13.883
cg01566404	0.934844	0.85847	0.0221219	33.314
cg01567482	0.0506433	19.9695	0.99165	402.137
cg01568335	0.291608	6.54e-11	7.72e-30	5.53788e+08
cg01568736	0.249026	0.51544	0.167031	1.5906
cg01570769	0.250873	1.32e-08	4.73e-22	370876
cg01570885	0.259603	0.461679	0.120438	1.76976
cg01573562	0.270576	3.83531	0.35094	41.9149
cg01578341	0.487715	0.00819695	1.05e-08	6401.19
cg01579216	0.364626	0.053733	9.66e-05	29.8783
cg01580044	0.965299	0.962742	0.17402	5.32623
cg01580568	0.850405	1.20488	0.173687	8.35835
cg01580681	0.205962	3.99577	0.466989	34.1897
cg01580888	0.627259	235.307	6.3e-08	879409000000
cg01584473	0.929903	1.07164	0.229383	5.0065
cg01585703	0.445329	19.8913	0.00919808	43015.7
cg01585758	0.330077	1e-05	8.75e-16	114960
cg01587454	0.632825	0.456461	0.0182862	11.3942
cg01589580	0.475838	2.37182	0.22082	25.4756
cg01593190	0.578106	0.721617	0.228539	2.27853
cg01593385	0.580457	1.64811	0.280247	9.69241
cg01593886	0.289837	2.67991	0.431896	16.6288
cg01594214	0.75713	3.19002	0.00204584	4974.1
cg01594262	0.108447	24.6802	0.492372	1237.1
cg01594915	0.868872	0.0775913	5.13e-15	1174630000000
cg01598046	0.716006	0.0209981	1.92e-11	2.29796e+07
cg01598642	0.86767	0.897011	0.249776	3.2214
cg01599709	0.580673	0.354653	0.00896344	14.0324
cg01600782	0.9756	1.98602	1.59e-19	2.47302e+19
cg01601573	0.869229	1.21336	0.121371	12.1301
cg01602430	0.939697	0.305276	1.36e-14	6843140000000
cg01603095	0.629309	0.444223	0.0164708	11.9809
cg01605984	0.89002	0.8795	0.142507	5.42796
cg01606998	0.985233	1.01475	0.215228	4.78434
cg01610488	0.651129	0.757375	0.227092	2.52592
cg01611640	0.834765	42.6947	2.05e-14	8.90126e+16
cg01612158	0.972465	1.03107	0.181468	5.85834
cg01615080	0.251821	8.17704	0.224766	297.482
cg01615704	0.588445	0.255219	0.00181387	35.9104
cg01618083	0.0835796	3.17e-37	1.43e-78	69976.8
cg01618304	0.196647	4.91e-07	1.3e-16	1854.01
cg01618851	0.479965	3.30232	0.120013	90.8674
cg01620308	0.704584	0.388388	0.00292398	51.5891
cg01620569	0.264	1.89e-06	1.72e-16	20841
cg01620785	0.335184	14.3906	0.0635112	3260.69
cg01623187	0.944012	0.930224	0.123571	7.00261
cg01623438	0.978989	1.04543	0.0383011	28.5353
cg01625242	0.665312	1.76402	0.134791	23.0858
cg01626197	0.0673255	1817180000000	0.133577	2.47e+25
cg01626227	0.274439	11.8637	0.140524	1001.59
cg01628253	0.679563	0.00101376	6.3e-18	163213000000
cg01630869	0.212907	1.51e-14	2.71e-36	8.43114e+07
cg01632825	0.0870188	79.1849	0.52986	11833.8
cg01634119	0.120438	5.54e-16	3.08e-35	9972.36
cg01635061	0.581733	1.42926	0.401069	5.09335
cg01636591	0.440215	1.91381	0.368173	9.94826
cg01637734	0.96851	1.02387	0.31748	3.30194
cg01638735	0.82198	0.0430509	5.43e-14	34146489843
cg01639256	0.590469	8.59742	0.00339941	21743.7
cg01643284	0.412864	228709000000000	9.77e-21	5.35e+48
cg01643580	0.172799	2.48323	0.671585	9.18189
cg01643624	0.179674	8.74371	0.368231	207.621
cg01644850	0.1994	0.130855	0.00585925	2.92241
cg01646665	0.451539	2.95526	0.175976	49.6294
cg01651364	0.357927	4.48e-08	9.67e-24	2.0796e+08
cg01651593	0.610484	2.06e-05	1.91e-23	22182600000000
cg01651821	0.702892	0.00083208	1.24e-19	5574500000000
cg01653110	0.192514	2.82e-11	3.82e-27	207653
cg01653445	0.837855	1.2624	0.135504	11.7611
cg01654582	0.9769	1.10076	0.00165762	730.979
cg01655123	0.108715	0.000839543	1.46e-07	4.8154
cg01655341	0.370796	61522.1	2e-06	1891220000000000
cg01655355	0.28779	471.011	0.0055514	3.99632e+07
cg01656216	0.168851	0.199968	0.0201924	1.98032
cg01656470	0.933365	1.1666	0.0314912	43.217
cg01656750	0.934696	1.05616	0.28585	3.90229
cg01656853	0.868686	1.4438	0.0185586	112.323
cg01656955	0.3442	1.69713	0.567192	5.0781
cg01657207	0.697843	0.728564	0.147282	3.60401
cg01657380	0.680771	5.34352	0.00182159	15674.9
cg01657408	0.229184	5.71e-09	2.09e-22	156012
cg01657694	0.770423	84132.7	7.04e-29	1.01e+38
cg01662650	0.350151	18.9043	0.039682	9005.94
cg01663295	0.453535	0.105524	0.000294785	37.7744
cg01663469	0.538242	1.39934	0.479993	4.07952
cg01663570	0.87301	5.13631	9.92e-09	2659955821
cg01663968	0.0213172	24.249	1.60659	366.003
cg01664666	0.416654	1.71488	0.466681	6.30153
cg01665633	0.0552829	34.8946	0.922853	1319.43
cg01667384	0.421416	1.19e-10	7.62e-35	186036000000000
cg01667702	0.239467	5.66976	0.314766	102.127
cg01668383	0.880835	1.14652	0.191871	6.85102
cg01669948	0.185889	3.57505	0.541402	23.6072
cg01671575	0.888322	1.24137	0.0607202	25.3786
cg01671881	0.956678	1.04557	0.209481	5.21866
cg01677098	0.920297	0.00149833	7.11e-59	3.16e+52
cg01677177	0.017176	2.98533e+08	31.9347	2790760000000000
cg01678091	0.703565	1.3064	0.329751	5.17567
cg01678321	0.918395	1.07236	0.281768	4.08125
cg01678893	0.426957	1.31e-07	1.37e-24	12552681292
cg01679262	0.195356	2.30148	0.651734	8.12728
cg01680823	0.820687	0.78782	0.10019	6.19484
cg01683883	0.93503	1.07187	0.202014	5.68732
cg01684579	0.149538	8.30275	0.46676	147.69
cg01684901	0.170022	22055.5	0.0137785	35304637954
cg01685739	0.122821	6.09e-19	4.43e-42	83523.1
cg01687051	0.575137	2.2e-09	1.17e-39	4.13e+21
cg01687711	0.158195	4.22e-13	2.74e-30	64924.2
cg01692572	0.853248	0.416272	3.86e-05	4491.23
cg01692815	0.496672	1.56956	0.427826	5.75822
cg01693108	0.68318	1.58e-05	1.38e-28	1.80308e+18
cg01693157	0.799039	0.00056089	5.25e-29	5.99e+21
cg01693350	0.264972	2.9221	0.443487	19.2534
cg01697732	0.440309	1.34101	0.636457	2.82549
cg01699584	0.410054	0.626239	0.20566	1.90691
cg01703884	0.875995	1.23043	0.0909812	16.6403
cg01704534	0.637365	2.35496	0.0668849	82.9158
cg01705458	0.282853	2.10863e+07	9.07e-07	4.9e+20
cg01705587	0.692022	1.28562	0.370872	4.45657
cg01708236	0.839031	0.426436	0.000114401	1589.56
cg01708964	0.786802	0.750478	0.0937472	6.00783
cg01712016	0.422932	1.89e-07	6.84e-24	5247161139
cg01714932	0.356213	1.77002	0.526233	5.95359
cg01716083	0.181583	2.02e-11	4.11e-27	99106.4
cg01717150	0.595242	1.294	0.500004	3.34885
cg01717706	0.236614	22.4659	0.129803	3888.33
cg01718139	0.08342	0.333953	0.096477	1.15597
cg01718602	0.607373	0.76715	0.279102	2.10862
cg01720228	0.936228	1.06063	0.250823	4.48496
cg01722450	0.774888	1.2897	0.22557	7.37384
cg01722994	0.320563	2.0453	0.498399	8.3934
cg01723464	0.0161488	7.3e-18	7.95e-32	0.000669512
cg01723747	0.814496	2.3377	0.00194155	2814.68
cg01724150	0.50802	1.98291	0.261208	15.0529
cg01725199	0.186112	3.9e-33	3.53e-81	4302330000000000
cg01726767	0.274235	0.471776	0.122709	1.81383
cg01726775	0.385391	0.0150178	1.15e-06	196.719
cg01727899	0.965816	1.04973	0.114078	9.6594
cg01729862	0.374732	5.32e-05	1.94e-14	145819
cg01731341	0.663718	1.48527	0.249649	8.83649
cg01731685	0.288741	5.31425	0.242775	116.327
cg01733599	0.926963	1.07416	0.232662	4.95925
cg01733783	0.195795	3.41e-05	5.81e-12	200.042
cg01737507	0.479777	0.0648088	3.28e-05	128.125
cg01738359	0.214812	2.18e-08	1.72e-20	27767.7
cg01739167	0.376701	3.41331	0.224404	51.9185
cg01739965	0.543877	0.00512272	2.06e-10	127600
cg01743370	0.00853524	8.28e-21	8.98e-36	7.64e-06
cg01745448	0.96698	1.94542	4.03e-14	93916500000000
cg01745510	0.0711073	6.05e-11	4.84e-22	7.56031
cg01745657	0.230113	0.000666767	4.33e-09	102.587
cg01746088	0.967964	1.42285	4.77e-08	4.24116e+07
cg01747191	0.551158	13.3807	0.00264351	67729.3
cg01747665	0.620444	2.0484	0.119925	34.9882
cg01753375	0.420836	0.403844	0.044403	3.67294
cg01753595	0.755408	0.793398	0.184977	3.40301
cg01755369	0.994308	1.21372	9.41e-24	1.56e+23
cg01756060	0.174425	3.35e-08	5.47e-19	2052.95
cg01757745	0.795072	1.21568	0.278463	5.30723
cg01761409	0.857045	0.792639	0.0632382	9.93509
cg01762581	0.517579	0.537468	0.0819614	3.52448
cg01765461	0.111679	3.99014e+07	0.0171972	9.25803e+16
cg01765473	0.630951	6.96e-05	7.59e-22	6380290000000
cg01767116	0.0649107	6.90398	0.887434	53.7109
cg01769037	0.497536	0.108163	0.000175115	66.8088
cg01770232	0.47747	0.160062	0.00102066	25.1012
cg01770400	0.0984715	4.2224	0.764756	23.3129
cg01772980	0.796047	1.35855	0.133033	13.8736
cg01773061	0.13994	1367260000000000	1.09e-05	1.72e+35
cg01773854	0.0660107	5302.79	0.567037	4.95905e+07
cg01775414	0.428208	0.681563	0.264009	1.75951
cg01776246	0.0272482	3.44e-14	3.85e-26	0.030756
cg01777397	0.956105	1.05066	0.180805	6.10541
cg01780107	0.698528	0.00473782	8.18e-15	2743223383
cg01780482	0.509424	2.05e-06	2.59e-23	162211000000
cg01782320	0.200212	3.59e-09	4.31e-22	29951.5
cg01782486	0.512993	2.05911	0.236528	17.9257
cg01782487	0.708539	95.7777	3.92e-09	2339960000000
cg01783386	0.346148	1.77e-06	1.9e-18	1.64437e+06
cg01785060	0.945413	1.46645	2.55e-05	84293.2
cg01785339	0.737964	0.0393571	2.31e-10	6.69981e+06
cg01785568	0.34115	2.46434	0.384755	15.784
cg01787047	0.581509	0.000281653	6.69e-17	1186512534
cg01788438	0.226705	2.31e-08	9.61e-21	55524.8
cg01789267	0.928764	1.10858	0.115706	10.6212
cg01791232	0.995012	0.992288	0.0876039	11.2396
cg01794265	0.117612	4.59284e+06	0.0207974	1014270000000000
cg01794711	0.419967	1.9e-09	1.2e-30	2985270000000
cg01795122	0.348514	3.26463	0.275151	38.7343
cg01795697	0.226935	9.52e-09	9.27e-22	97735.1
cg01796223	0.776825	0.785506	0.147968	4.16997
cg01796228	0.251988	2.10402	0.589284	7.51232
cg01797043	0.48043	2.57148	0.186562	35.4442
cg01797527	0.978421	1.03859	0.0668001	16.1478
cg01798443	0.763243	19.2086	8.56e-08	4312684546
cg01800843	0.663419	8.38853	0.000580432	121233
cg01801174	0.508786	429.348	6.65e-06	27713533840
cg01802635	0.933866	3.50022	4.93e-13	24844800000000
cg01802653	0.0785038	201762000000	0.0514683	7.91e+23
cg01803059	0.837937	3.189	4.76e-05	213787
cg01803238	0.804709	1.37936	0.107765	17.6554
cg01803810	0.875685	0.141002	3.09e-12	6428374907
cg01804429	0.535789	1.55959	0.381999	6.36738
cg01804844	0.968951	0.894695	0.00329842	242.686
cg01805282	0.328041	3.01902	0.329804	27.636
cg01805540	0.974057	1.0228	0.262914	3.97892
cg01805784	0.644251	6701.19	3.85e-13	1.17e+20
cg01806808	0.557175	0.00614342	2.54e-10	148686
cg01808130	0.192844	1.83e-06	4.25e-15	790.091
cg01809579	0.603549	1938.44	7.58e-10	4954650000000000
cg01813334	0.273475	2124.67	0.00235622	1915863954
cg01813965	0.181606	0.18206	0.0149549	2.2164
cg01816336	0.277626	9.22e-12	1.1e-31	7.70452e+08
cg01817029	0.131388	3.11864	0.711592	13.6678
cg01817393	0.261658	1.83387	0.636065	5.28732
cg01818492	0.642117	4.79e-05	2.89e-23	79205200000000
cg01819572	0.877977	0.667287	0.00381553	116.7
cg01819863	0.342043	7.65e-20	2.81e-59	2.08e+20
cg01820374	0.789624	1.41609	0.109939	18.2402
cg01820777	0.0841089	10.7314	0.726426	158.533
cg01824804	0.353739	1.80894	0.516847	6.33121
cg01827098	0.658358	0.509556	0.0256639	10.1172
cg01830294	0.793975	1.27155	0.209563	7.71523
cg01833398	0.280497	1.16e-07	2.94e-20	457508
cg01835489	0.760648	1.43172	0.142257	14.4094
cg01836044	0.901677	1.06605	0.386439	2.94087
cg01837574	0.287456	2.94319	0.402712	21.51
cg01837719	0.908581	0.938621	0.318373	2.76722
cg01838317	0.505488	108278	1.64e-10	7.1336e+19
cg01839464	0.527987	1.71878	0.319661	9.24172
cg01840268	0.0405268	65.741	1.19793	3607.8
cg01843018	0.611371	0.619328	0.0975652	3.9314
cg01846065	0.70965	3.98e-06	1.5e-34	1.06e+23
cg01848594	0.422373	0.000446727	2.93e-12	68177.7
cg01849789	0.201296	978372	0.000634479	1508660000000000
cg01851208	0.377662	7.34359	0.0875319	616.099
cg01851385	0.61104	0.572384	0.0666629	4.91464
cg01851399	0.958853	0.739742	7.86e-06	69588.3
cg01852131	0.0799521	8.39e-13	2.55e-26	27.6354
cg01856970	0.668501	0.00164216	2.95e-16	9138257779
cg01856985	0.741446	3.16042e+06	7.74e-33	1.29e+45
cg01857260	0.114427	4.48466	0.695911	28.9005
cg01858173	0.844626	0.189184	1.11e-08	3.22588e+06
cg01860753	0.0765197	8.60845	0.795039	93.2098
cg01861509	0.628441	1.50621	0.286693	7.91329
cg01862366	0.83116	0.139106	1.86e-09	1.04255e+07
cg01866162	0.267275	7.03e-15	6.94e-40	71125045534
cg01866521	0.86688	13.7334	6.82e-13	276353000000000
cg01868559	0.0807153	3.8328e+18	0.00536117	2.74e+39
cg01868782	0.338963	1.84809	0.524832	6.50764
cg01869233	0.92569	0.895335	0.0877029	9.14025
cg01870826	0.733561	0.839239	0.305932	2.30222
cg01872771	0.867392	4.68799	6.23e-08	3.52538e+08
cg01873645	0.427455	7.26e-06	1.48e-18	3.57476e+07
cg01875775	0.0970318	1.26e-10	2.57e-22	62.0675
cg01876612	0.587156	0.00523942	3.06e-11	895650
cg01879488	0.470249	0.0129328	9.69e-08	1726.74
cg01880404	0.895684	0.150698	7.8e-14	291115000000
cg01880569	0.524408	1.9009	0.263057	13.7363
cg01881255	0.714059	3618655886	2.69e-42	4.88e+60
cg01882150	0.0114643	4.99e-12	8.65e-21	0.00288271
cg01882179	0.313191	4.78e-10	3.69e-28	619993619
cg01883521	0.487313	27456.6	8.2e-09	9.19257e+16
cg01883966	0.913141	1.08223	0.261594	4.47726
cg01885202	0.169787	0.361852	0.0847776	1.54448
cg01885635	0.74164	0.370256	0.00100749	136.07
cg01887353	0.225083	0.454072	0.126813	1.62587
cg01888411	0.705225	1.29044	0.344329	4.83617
cg01888566	0.192722	5.88419	0.408832	84.6892
cg01888601	0.629648	0.735371	0.210828	2.56498
cg01889448	0.17786	2.7705	0.6292	12.1991
cg01892528	0.951424	0.725473	2.38e-05	22127.7
cg01892689	0.552171	1.82457	0.25129	13.2479
cg01892727	0.199327	8.02557	0.333634	193.055
cg01894895	0.887349	1.6039	0.00232485	1106.52
cg01899253	0.685633	1.24545	0.430289	3.6049
cg01902747	0.12947	5.3e-07	4.09e-15	68.6711
cg01906055	0.703852	1.32987	0.305801	5.78333
cg01909245	0.607129	1.63592	0.250572	10.6805
cg01909378	0.666215	1.3832	0.316763	6.03995
cg01909487	0.0885602	2.33e-11	1.36e-23	40.1707
cg01909833	0.420263	174.76	0.000615497	4.96202e+07
cg01909921	0.821131	1.35985	0.0946832	19.5302
cg01910452	0.409934	0.574727	0.15393	2.14585
cg01910481	0.567452	0.716599	0.228672	2.24564
cg01914242	0.433779	0.00069517	8.61e-12	56158.8
cg01918706	0.683231	4.34444	0.00374832	5035.37
cg01918888	0.00354813	5.11e-21	1.17e-34	2.23e-07
cg01919208	0.903817	0.817974	0.0314369	21.2834
cg01919488	0.105022	2154.49	0.200874	2.31081e+07
cg01920232	0.522201	0.707133	0.244667	2.04375
cg01920829	0.962167	0.966594	0.237432	3.93503
cg01924619	0.996164	1.07921	3.46e-14	33673900000000
cg01924993	0.163571	3.94e-17	3.28e-40	4.72273e+06
cg01926595	0.578699	0.192892	0.00057907	64.2539
cg01928902	0.0314688	1.06e-22	1.02e-42	0.01116
cg01929065	0.50092	1.11e-07	6.13e-28	19978200000000
cg01929105	0.892242	6.84941	5.56e-12	8432770000000
cg01930621	0.93993	0.938391	0.179526	4.90501
cg01931893	0.62947	0.0505743	2.75e-07	9310.91
cg01932459	0.913111	0.588056	4.24e-05	8150.56
cg01934790	0.88081	0.896668	0.215507	3.7308
cg01934797	0.917541	0.535325	3.9e-06	73484.4
cg01936124	0.383726	3093660000000	2.43e-16	3.94e+40
cg01936270	0.62031	0.582	0.0683757	4.95386
cg01938354	0.589408	0.00496068	2.12e-11	1.16e+06
cg01939479	0.0481951	1.27e-08	1.87e-16	0.86564
cg01939597	0.151699	3.39e-12	7.05e-28	16286.5
cg01939681	0.433951	1.60527	0.490531	5.2533
cg01940867	0.576897	8.89523e+06	3.44e-18	2.3e+31
cg01941619	0.257675	2.34777	0.5356	10.2913
cg01942127	0.110435	3.21563	0.766327	13.4933
cg01943185	0.634691	0.588298	0.0659432	5.24838
cg01944444	0.768212	19.3067	5.44e-08	6857340118
cg01946401	0.924867	0.817866	0.0125294	53.387
cg01946574	0.745999	0.828505	0.26541	2.58626
cg01947224	0.176396	8.60578	0.379823	194.984
cg01951308	0.630623	5772.34	2.69e-12	1.23818e+19
cg01952458	0.399802	5.31e-05	5.94e-15	474636
cg01954353	0.436079	13.6485	0.0189928	9808.09
cg01956781	0.425083	1.03e-19	2.25e-66	4.68e+27
cg01957330	0.815322	0.435274	0.000404986	467.826
cg01958189	0.360146	2.18653	0.409314	11.6802
cg01958916	0.397398	10.3484	0.046179	2319
cg01959004	0.88185	0.366082	6.43e-07	208368
cg01959848	0.828584	0.034324	1.9e-15	618932000000
cg01962086	0.318196	0.282099	0.023509	3.38507
cg01962969	0.0503297	14.1805	0.996195	201.854
cg01965939	0.873044	0.653592	0.00354744	120.42
cg01966465	0.924038	0.933481	0.226776	3.8425
cg01968178	0.65001	0.522378	0.0316098	8.63273
cg01968530	0.697904	0.000656768	5.58e-20	7724190000000
cg01968793	0.614523	1.56609	0.273305	8.974
cg01969748	0.638693	0.000872024	1.48e-16	5149694520
cg01971122	0.405466	1.89986	0.418843	8.6177
cg01980222	0.641257	1.56175	0.239436	10.1867
cg01982455	0.860289	609.848	5.88e-29	6.32e+33
cg01982833	0.65054	1.4119	0.31745	6.2796
cg01985090	0.0325591	1.99e-18	1.17e-34	0.033877
cg01985396	0.0786447	0.0872976	0.00576434	1.32207
cg01985852	0.468789	4.43e-05	7.39e-17	2.65851e+07
cg01986577	0.611539	2.86805	0.04917	167.291
cg01988129	0.476785	2.51124	0.198744	31.7308
cg01990225	0.0660062	1.36e-09	4.78e-19	3.85866
cg01990304	0.450861	6.51895e+07	3.17e-13	1.34e+28
cg01990334	0.918924	0.0339166	1.71e-30	6.72e+26
cg01991150	0.504132	12.6528	0.00738407	21681
cg01991383	0.922709	0.227675	2.37e-14	2189780000000
cg01992081	0.883044	18.3201	2.74e-16	1.22704e+18
cg01993411	0.367216	0.00240216	4.86e-09	1186.34
cg01993576	0.369034	2.0968	0.416823	10.5478
cg01994328	0.644179	1.53341e+08	2.81e-27	8.36e+42
cg01994513	0.962794	0.282211	2.32e-24	3.43e+22
cg01994779	0.371391	14.7505	0.0403643	5390.35
cg01995513	0.845209	1.92858	0.00264082	1408.43
cg01997953	0.522259	2.03452	0.231002	17.9188
cg01998146	0.467966	102.097	0.000383516	2.71794e+07
cg01998682	0.74319	115.805	5.22e-11	256665000000000
cg01999333	0.864831	0.864891	0.162611	4.60016
cg01999523	0.671094	0.00365043	2.05e-14	6.5072e+08
cg02001410	0.996308	1.00239	0.364142	2.75935
cg02004156	0.220706	0.387733	0.0851159	1.76626
cg02005336	0.898416	0.314239	6.01e-09	1.64297e+07
cg02005375	0.976985	0.596227	3.29e-16	1081220000000000
cg02005755	0.891788	1.12304	0.211039	5.97621
cg02007463	0.980502	1.0235	0.158907	6.59222
cg02007844	0.30767	1.79614	0.583008	5.5336
cg02008154	0.158919	2.59484	0.688578	9.77839
cg02008416	0.316266	1.95353	0.527294	7.23746
cg02008544	0.463177	61.3858	0.00102575	3.67363e+06
cg02010852	0.852962	1.19135	0.187037	7.58841
cg02014107	0.284452	5.04e-05	6.81e-13	3730.92
cg02016419	0.982339	0.980516	0.171722	5.59866
cg02017041	0.155536	6.7024	0.485309	92.564
cg02017109	0.700504	1.38502	0.263427	7.28196
cg02018101	0.405197	681049	1.25e-08	3.70134e+19
cg02019333	0.378704	1.93428	0.445227	8.40348
cg02021817	0.198933	2080.89	0.0180078	2.40456e+08
cg02022375	0.614339	1.39883	0.379127	5.16115
cg02025407	0.452254	4.29e-09	6.53e-31	28224700000000
cg02026235	0.747732	1.3912	0.18604	10.4033
cg02027010	0.283301	3.08963e+06	4.31e-06	2.21433e+18
cg02029926	0.954268	1.20665	0.00196541	740.812
cg02032115	0.819269	5.22393	3.62e-06	7.53422e+06
cg02032561	0.595337	0.709905	0.200489	2.51368
cg02033116	0.172975	2.84e-06	3e-14	269.642
cg02034222	0.894973	1.08716	0.314382	3.7595
cg02037013	0.157966	2.40786	0.711013	8.15429
cg02039171	0.3304	0.286773	0.0231834	3.54732
cg02040734	0.759216	10.033	3.96e-06	2.5411e+07
cg02043070	0.557531	0.00273344	7.43e-12	1.00582e+06
cg02043083	0.18412	11781.6	0.0115719	11994977009
cg02044879	0.890062	1.13106	0.197287	6.48442
cg02045085	0.0362485	1715300000000000	9.4629	3.11e+29
cg02046017	0.518302	2.18485	0.203967	23.4036
cg02046340	0.512144	0.000429683	3.68e-14	5.01279e+06
cg02046532	0.72773	1.32596	0.270848	6.49132
cg02047577	0.834208	1.87e-06	4.21e-60	8.28e+47
cg02049180	0.760892	0.818092	0.224485	2.98138
cg02053171	0.640799	0.000397715	2.07e-18	76506383711
cg02055483	0.154911	2.53379	0.703725	9.12304
cg02055963	0.702086	2.45001	0.0248353	241.694
cg02056135	0.661757	6560.4	5.21e-14	8.26e+20
cg02059813	0.586831	11.5419	0.00170231	78256.4
cg02060618	0.370708	2.18303	0.39507	12.0627
cg02060698	0.078557	3.38e-26	1.41e-54	809.228
cg02060988	0.219788	2.89e-15	1.74e-38	4.81989e+08
cg02061229	0.990311	0.98796	0.139849	6.97942
cg02062650	0.815213	2.99329	0.000304047	29468.5
cg02064106	0.565347	0.742664	0.269345	2.04775
cg02064402	0.547243	2.04084	0.199976	20.8276
cg02065387	0.34232	1.78831	0.538764	5.93593
cg02065795	0.645864	0.191905	0.000167976	219.244
cg02066681	0.8893	0.883434	0.154255	5.05951
cg02068676	0.961442	11.786	4.33e-43	3.21e+44
cg02071074	0.772611	1.36561	0.164985	11.3034
cg02071439	0.747332	0.00390109	8.64e-18	1762080000000
cg02075593	0.209881	2.4304	0.606491	9.73936
cg02077702	0.428399	2.21343	0.309785	15.8151
cg02077793	0.559648	0.00560843	1.53e-10	205204
cg02078356	0.636306	22.6042	5.51e-05	9.26975e+06
cg02082342	0.371791	1.92115	0.458442	8.05081
cg02082571	0.440721	4.22291	0.108441	164.449
cg02084087	0.945301	1.0961	0.0796928	15.0759
cg02085507	0.219607	4.26239	0.421056	43.1486
cg02089348	0.417217	2.31282	0.305064	17.5345
cg02091100	0.279506	2.67207	0.450025	15.8657
cg02092466	0.201721	0.369956	0.0803828	1.70269
cg02094237	0.172495	0.000216333	1.17e-09	39.846
cg02096520	0.722364	1.4428	0.190974	10.9002
cg02096633	0.199155	315871	0.00127213	78430900000000
cg02096656	0.848844	0.539923	0.000954501	305.413
cg02097420	0.251272	5.31026	0.306438	92.0215
cg02097636	0.192587	3.93e-19	8.09e-47	1908627173
cg02099418	0.262979	2.24038	0.545668	9.19847
cg02100629	0.284295	55.586	0.0355462	86923.5
cg02100828	0.800217	0.00534894	1.36e-20	2101580000000000
cg02100848	0.53969	2.32581	0.156695	34.5218
cg02101486	0.285277	2.01898	0.556473	7.32523
cg02102644	0.230276	9.89e-10	1.92e-24	509388
cg02103294	0.457593	1.97e-05	7.53e-18	5.14262e+07
cg02104644	0.189487	2.43017	0.64504	9.15558
cg02105034	0.396192	1.57035e+08	1.83e-11	1.35e+27
cg02105377	0.0442573	2.95e-13	1.83e-25	0.47654
cg02105856	0.160106	2.32207	0.716768	7.52269
cg02111587	0.287802	1.95623	0.567644	6.74163
cg02113971	0.916785	0.784907	0.00835179	73.7661
cg02114786	0.0776489	3760624957	0.0869468	1.63e+20
cg02115041	0.739808	0.726802	0.110547	4.77842
cg02119229	0.768111	0.0667448	1.02e-09	4.35507e+06
cg02119982	0.600543	3.04945	0.0469606	198.02
cg02121427	0.363818	2.56053	0.336542	19.4814
cg02123547	0.774444	0.0185676	2.68e-14	12868054518
cg02124291	0.435398	1.93841	0.367407	10.2269
cg02125271	0.907664	1.08209	0.285263	4.10473
cg02126424	0.843394	0.541465	0.00123107	238.154
cg02126638	0.827549	0.0428498	2.11e-14	87158963639
cg02126753	0.40648	1.59079	0.531599	4.76036
cg02128567	0.841235	0.372498	2.37e-05	5853.91
cg02130905	0.268487	2.48418	0.495704	12.4493
cg02131399	0.317411	1.09e-06	2.21e-18	534275
cg02131853	0.406162	2.71203	0.257591	28.5535
cg02131967	0.457799	6.18432	0.0504043	758.779
cg02131995	0.891923	0.906661	0.220589	3.72654
cg02132188	0.484868	0.619808	0.161933	2.37235
cg02136132	0.164836	2.01562	0.749663	5.4194
cg02144298	0.00263146	291.117	7.21796	11741.4
cg02144933	0.921546	0.938928	0.267913	3.29057
cg02147791	0.286369	1.73e-05	3.07e-14	9804.61
cg02148711	0.302772	0.532618	0.160722	1.76505
cg02149446	0.422811	1.78575	0.432579	7.37189
cg02150709	0.499879	6.38e-08	7.97e-29	50995200000000
cg02150910	0.758695	0.712317	0.0817902	6.20363
cg02153528	0.715607	2.64192	0.0141964	491.657
cg02153871	0.894237	13.6765	2.45e-16	7.64466e+17
cg02154186	0.450678	0.607703	0.166581	2.21695
cg02154956	0.00458262	1636.73	9.81763	272865
cg02157083	0.077734	13.0089	0.751987	225.044
cg02157306	0.444878	12.0791	0.0202358	7210.22
cg02159896	0.474701	6.98e-07	9.23e-24	52801180101
cg02160826	0.283852	7.47e-09	1.02e-23	5.44305e+06
cg02161046	0.067276	5.62e-16	2.6e-32	12.1503
cg02161900	0.6959	1.38476	0.270682	7.08415
cg02162069	0.656366	0.388002	0.00599282	25.121
cg02162412	0.179313	8.42e-17	2.91e-40	2.43673e+07
cg02162950	0.282702	2.81e-15	7.95e-42	993094000000
cg02163937	0.407945	9.78e-16	2.75e-51	3.47e+20
cg02164046	0.6542	1.75884	0.148669	20.8082
cg02164386	0.258931	2.13451	0.572258	7.96167
cg02164442	0.991387	0.988624	0.123849	7.89169
cg02165720	0.227732	0.406128	0.0939263	1.75606
cg02166532	0.998447	1.00204	0.128124	7.83689
cg02169098	0.337541	9.08e-17	1.49e-49	5.53026e+16
cg02169446	0.200511	6.06019e+08	2.17e-05	1.7e+22
cg02170525	0.664184	1.44712	0.272833	7.67563
cg02171008	0.309474	342791	7.26e-06	1.6189e+16
cg02171545	0.676019	1.27013	0.413806	3.89853
cg02173484	0.306222	2.59561	0.41758	16.1339
cg02175308	0.670021	1.89786	0.0996253	36.1542
cg02178898	0.702105	0.00729119	8.15e-14	6.52468e+08
cg02181494	0.26261	4.24e-09	9.49e-24	1.88966e+06
cg02181506	0.756715	2.9041	0.00341763	2467.74
cg02184413	0.583738	1.56457	0.315531	7.75796
cg02186298	0.217628	10.1418	0.255049	403.282
cg02186966	0.0620139	2.21e-25	2.81e-51	17.3331
cg02189785	0.988722	1.10345	1.3e-06	935119
cg02192520	0.870609	1.19869	0.135408	10.6113
cg02192855	0.625294	0.620468	0.0913757	4.21316
cg02192965	0.711419	1.29882	0.325073	5.18938
cg02194211	0.125413	3.23374	0.72078	14.508
cg02196655	0.0243258	7.26663	1.29324	40.8308
cg02196730	0.236447	6.4641	0.29425	142.004
cg02196805	0.987505	0.984826	0.145316	6.67429
cg02197293	0.816369	0.899412	0.367588	2.20068
cg02198044	0.402416	18.5682	0.0199006	17325
cg02198582	0.0693182	12.0215	0.821494	175.918
cg02200132	0.385591	9.21e-10	3.58e-30	237374000000
cg02200584	0.925307	1.05805	0.325197	3.44246
cg02201963	0.390329	0.000315689	3.25e-12	30665.2
cg02204046	0.868633	0.65638	0.00447095	96.363
cg02205739	0.301387	2.09145	0.516083	8.47568
cg02205962	0.303917	0.596122	0.222343	1.59826
cg02206259	0.970643	1.09798	0.00756041	159.458
cg02207610	0.225908	4.52e-07	2.44e-17	8397.06
cg02210123	0.0181643	35.2773	1.83458	678.352
cg02210887	0.263682	2.2476	0.543217	9.2996
cg02212280	0.375685	91.3364	0.00419563	1.98834e+06
cg02212737	0.620844	0.00440701	2.04e-12	9.52214e+06
cg02212836	0.867626	0.798151	0.0563228	11.3106
cg02213716	0.921095	0.0890748	1.48e-22	5.37844e+19
cg02214188	0.722735	0.657135	0.0646207	6.68248
cg02215538	0.315088	1.53e-05	6.18e-15	37933.6
cg02216250	0.136228	1.35e-09	2.92e-21	627.059
cg02217159	0.985272	0.986547	0.234201	4.15572
cg02217814	0.475066	4.35106	0.0769594	245.996
cg02218214	0.572783	0.377534	0.0127856	11.1478
cg02218260	0.63862	1.962	0.117798	32.6783
cg02218324	0.458455	0.259871	0.00737219	9.16046
cg02224164	0.719115	1.48043	0.174507	12.5592
cg02225847	0.182275	0.050629	0.000631746	4.05748
cg02226871	0.517463	1.2e-09	1.17e-36	1.23132e+18
cg02227605	0.112433	0.00244343	1.45e-06	4.10335
cg02228185	0.832762	1.24585	0.161947	9.58421
cg02229516	0.24231	1.21e-07	3.09e-19	47591.2
cg02229946	0.874353	1.25564	0.0747256	21.099
cg02233558	0.82522	0.0762422	9.15e-12	6.35231e+08
cg02233559	0.36029	3.1629	0.268327	37.2827
cg02235880	0.244827	0.0033054	2.18e-07	50.1151
cg02237119	0.533136	0.371899	0.0165755	8.34415
cg02237186	0.464899	9.6e-11	1.31e-37	7.06147e+16
cg02238747	0.013432	6.08166e+06	25.435	1454160000000
cg02238826	0.186852	9.85e-17	1.68e-40	5.77199e+07
cg02239021	0.113633	5.25e-15	1.07e-32	2574.99
cg02239082	0.709921	491.339	3.23e-12	7.46353e+16
cg02240226	0.869074	2.16984	0.000216834	21713.4
cg02240622	0.499036	2.59992	0.162876	41.5012
cg02241586	0.843068	5.11341	4.92e-07	5.31046e+07
cg02244695	0.0527368	3.58612	0.98502	13.0559
cg02245378	0.269847	3.5144	0.37694	32.7664
cg02246968	0.103599	5.44e-13	9.28e-28	319.108
cg02247582	0.536856	0.425054	0.0281356	6.42144
cg02248486	0.797777	0.883768	0.343446	2.27414
cg02250594	0.385703	0.636824	0.229722	1.76537
cg02250787	0.132682	3.37044	0.691583	16.4259
cg02250992	0.52804	1.74e-06	2.27e-24	1341290000000
cg02252907	0.509241	5.69e-05	1.41e-17	229558159
cg02252918	0.802107	0.0514741	4.32e-12	6.13034e+08
cg02254407	0.569622	2.19016	0.14685	32.6647
cg02254461	0.44599	1.66018	0.450791	6.11411
cg02254649	0.230055	0.00559559	1.18e-06	26.646
cg02257405	0.870853	0.808825	0.0626573	10.4409
cg02257681	0.896231	27.0915	7.96e-21	9.22e+22
cg02259997	0.409162	11142.5	2.73e-06	45411400000000
cg02260587	0.276601	0.373337	0.0632789	2.20264
cg02261346	0.276967	0.323555	0.0423121	2.47417
cg02268424	0.431764	4.4344	0.108207	181.725
cg02269221	0.419519	1824.85	2.2e-05	151102000000
cg02271621	0.327148	0.0426736	7.77e-05	23.4498
cg02273078	0.373957	1.49e-20	2.94e-64	7.58e+23
cg02273392	0.383477	2.51472	0.316093	20.0062
cg02273788	0.623518	1.56297	0.26275	9.29729
cg02275294	0.482294	4.31122	0.0731768	253.996
cg02275830	0.554141	0.00537257	1.62e-10	178028
cg02275989	0.596178	9.77e-05	1.44e-19	66457612252
cg02276686	0.15166	5.77e-14	4.6e-32	72383.5
cg02276793	0.990483	0.781776	2.11e-18	2.89291e+17
cg02277509	0.237164	77.8312	0.0569598	106350
cg02278071	0.968646	0.365501	5.84e-23	2.29e+21
cg02278165	0.521385	5.01e-06	3.15e-22	79670546877
cg02279071	0.977329	0.984421	0.333323	2.90735
cg02280309	0.191258	2.51133	0.631177	9.99207
cg02282237	0.890826	1.11302	0.241243	5.13516
cg02283643	0.915053	0.901923	0.13534	6.01052
cg02284889	0.423097	6.12e-05	3e-15	1.24597e+06
cg02285477	0.223149	5.48e-09	2.81e-22	107171
cg02286642	0.840511	0.903433	0.336008	2.42908
cg02286990	0.289544	17.284	0.0885762	3372.67
cg02290509	0.513008	8129.23	1.57e-08	4218430000000000
cg02292024	0.339073	0.000559006	1.2e-10	2604.83
cg02293044	0.956321	1.08234	0.0637726	18.3694
cg02296128	0.394897	8.81e-06	1.99e-17	3.89363e+06
cg02298612	0.737066	0.623987	0.0397619	9.79228
cg02299279	0.464667	5.07518e+07	1.12e-13	2.29e+28
cg02300906	0.806375	0.169097	1.14e-07	251358
cg02301754	0.410086	982.559	7.46e-05	12948092313
cg02301815	0.474612	0.0124175	7.4e-08	2083.16
cg02303361	0.400448	1.63e-08	1.15e-26	23176581537
cg02304930	0.808187	0.562054	0.0053656	58.8759
cg02305261	0.386018	2.55045	0.307087	21.1823
cg02305723	0.463158	3.24622	0.139711	75.4268
cg02307482	0.0222192	4.85e-16	3.63e-29	0.0064928
cg02309273	0.888493	0.930869	0.341977	2.53385
cg02309431	0.275164	0.315692	0.039802	2.50394
cg02309594	0.644299	1.60673	0.214627	12.0283
cg02310296	0.343139	0.448739	0.0856026	2.35234
cg02311163	0.625241	1.43419	0.337434	6.09569
cg02312170	0.800101	0.0233355	5.44e-15	100010000000
cg02314308	0.328331	0.470547	0.103785	2.1334
cg02316718	0.582414	4.8e-06	5.29e-25	43591400000000
cg02317742	0.855941	15.2587	2.55e-12	91394000000000
cg02317907	0.0661946	6.61432	0.881309	49.6412
cg02318426	0.312487	1.96e-07	1.9e-20	2.03228e+06
cg02318535	0.274624	2.24549	0.526065	9.58477
cg02320454	0.638222	0.8091	0.334589	1.95656
cg02321871	0.5181	0.000443979	3.02e-14	6.53003e+06
cg02322621	0.742423	1.11e-06	3.42e-42	3.61e+29
cg02322989	0.0279244	0.311838	0.11034	0.881299
cg02323334	0.668929	0.0206139	3.87e-10	1.09926e+06
cg02324920	0.910344	1.11642	0.164191	7.59114
cg02326006	0.933024	1.11237	0.0928274	13.3297
cg02326931	0.589722	0.00162801	1.19e-13	2.22035e+07
cg02327719	0.758126	0.590679	0.0207049	16.8512
cg02329886	0.421861	3.04623	0.20104	46.1575
cg02330106	0.174693	2.86757	0.62639	13.1275
cg02331561	0.406786	6.11852	0.084738	441.788
cg02332492	0.63237	0.641526	0.104082	3.95413
cg02332525	0.692614	1.6925	0.124586	22.9926
cg02332537	0.16913	9.70703	0.380252	247.8
cg02334775	0.891313	0.794753	0.0294572	21.4424
cg02335441	0.916298	0.72568	0.00183559	286.889
cg02335804	0.933471	0.623471	9.49e-06	40951.3
cg02336128	0.646609	7413.86	2.12e-13	2.6e+20
cg02337166	0.838919	0.0660134	2.75e-13	15871187148
cg02342494	0.37628	6.49e-06	2.09e-17	2.01412e+06
cg02344078	0.474784	7.4e-06	6.29e-20	8.70213e+08
cg02344201	0.211718	29.1735	0.146496	5809.67
cg02344238	0.380357	74.7374	0.00487076	1.14678e+06
cg02345317	0.85214	1.09716	0.413821	2.90889
cg02351381	0.297212	0.437716	0.0925909	2.06927
cg02352653	0.959374	2.05825	1.78e-12	2375450000000
cg02357714	0.340167	0.476618	0.10396	2.18511
cg02357725	0.224534	3.94e-14	9.19e-36	1.68615e+08
cg02358761	0.459509	22.575	0.00584444	87199.1
cg02358804	0.513022	0.0294735	7.65e-07	1136.06
cg02360616	0.727978	1.92526	0.0480155	77.1963
cg02360776	0.619887	158.048	3.24e-07	77126904621
cg02360836	0.291692	0.00373058	1.14e-07	121.728
cg02361363	0.336959	0.00109858	1e-09	1205.46
cg02361557	0.295929	0.580516	0.209372	1.60957
cg02364038	0.051613	1.91e-27	2.37e-54	1.53787
cg02364642	0.974129	0.980947	0.306702	3.13744
cg02366059	0.758706	0.0731075	4.13e-09	1.29554e+06
cg02367472	0.481062	600.922	1.12e-05	32256920940
cg02372712	0.296596	0.000452645	2.38e-10	862.059
cg02374486	0.0880431	5.84366	0.768724	44.4221
cg02376163	0.615464	0.122375	3.37e-05	444.197
cg02376703	0.16383	2787896404	0.000140946	5.51e+22
cg02381948	0.62346	4.57105	0.0105955	1972.02
cg02382666	0.67571	1.35944	0.322505	5.73035
cg02385474	0.161392	8.19799	0.431429	155.778
cg02385791	0.564123	1.30157	0.531446	3.18769
cg02387613	0.453345	2.06506e+07	1.57e-12	2.72e+26
cg02387679	0.0663269	9.09387	0.861753	95.9655
cg02387854	0.0206349	3.55e-23	3.47e-42	0.000363336
cg02388150	0.90319	1.10861	0.210495	5.83866
cg02391387	0.400317	1.13845e+06	8.77e-09	1.48e+20
cg02397514	0.822912	0.674314	0.021385	21.2626
cg02397720	0.158104	3.4368	0.618951	19.0833
cg02398725	0.0702766	1.03e-11	1.31e-23	8.11935
cg02399449	0.142979	2.8e-10	4.64e-23	1694.9
cg02399455	0.49135	1.73232	0.362234	8.28453
cg02400248	0.393064	9.88e-05	6.35e-14	153564
cg02401978	0.306826	1.79578	0.584262	5.5195
cg02403232	0.394451	4.01e-06	1.52e-18	10570765
cg02404636	0.280134	6.31955	0.22266	179.362
cg02404843	0.946977	0.794599	0.000906495	696.515
cg02407785	0.536894	1.42972	0.459718	4.44642
cg02409351	0.812994	1.11795	0.443857	2.81579
cg02412050	0.439	4.94e-06	1.8e-19	1.3581e+08
cg02413850	0.665753	1.32111	0.373441	4.67366
cg02416716	0.0781542	5.04418	0.83333	30.5326
cg02417264	0.313394	2.25428	0.464196	10.9475
cg02417408	0.261962	3.51871	0.390602	31.6981
[truncated: 20,832 more rows]
