# Supplementary material for: Molecular subtypes based on DNA methylation predict prognosis in colon adenocarcinoma patients
Source: Aging (Albany NY). 2019 Dec 18;11(24):11880–92. doi: 10.18632/aging.102492 (PMC6949097; doi:10.18632/aging.102492)
Supplement: Supplementary Table 7 [file aging-11-102492-s003..xlsx]

## Sheet: Supplementary Table 8
Supplementary Table 7. Multivariate Cox regression analysis of the 864 methylation sites (356 CpG sites were identified, P<0.05).
V1	V2	V3	V4
cg00024812	0.706394	7.74332e-07	1.29144e+06	0.971645
cg00031162	0.0159089	18.445	0.0542152	0.972601
cg00041575	0.267431	2.73181	0.366058	0.971235
cg00047469	0.373525	1.43431e-05	69720.1	0.972049
cg00061629	0.0547152	3.52539	0.283656	0.97478
cg00076645	0.0286254	17204.8	5.81234e-05	0.972249
cg00126657	0.153	3.09271	0.323341	0.972706
cg00158308	0.0456987	6.17555	0.161929	0.969919
cg00221494	0.00336567	13.5762	0.0736583	0.967186
cg00302793	0.303096	8.66949e-07	1.15347e+06	0.970144
cg00336605	0.0454521	409661	2.44104e-06	0.96936
cg00371195	0.0487175	77013	1.29848e-05	0.975613
cg00420568	0.00613645	7160.85	0.000139648	0.971083
cg00461841	0.0260527	62.1605	0.0160874	0.969736
cg00498305	0.0621684	5.50101	0.181785	0.972748
cg00520135	0.00261036	58.1576	0.0171947	0.969668
cg00568792	0.225562	2.72514e-09	3.66954e+08	0.973289
cg00630249	0.112044	2.33123e-13	4.28959e+12	0.972635
cg00676660	0.00130023	110.9	0.00901714	0.968728
cg00763679	0.143389	2.02589e-10	4.9361e+09	0.971376
cg00856375	0.0508645	166899	5.99163e-06	0.966695
cg00873037	0.127822	428840	2.33187e-06	0.971684
cg00875272	0.223073	3.70039	0.270242	0.973409
cg00890257	0.171772	1947.15	0.00051357	0.970177
cg00905170	0.221277	7.99781e-15	125034300565153	0.97408
cg00922727	0.109141	1.58563e-08	6.30662e+07	0.972632
cg00935388	0.100174	684.438	0.00146105	0.975139
cg01031400	0.0602451	6.64069e-06	150587	0.971441
cg01036779	0.208837	98.6083	0.0101411	0.968468
cg01040850	0.574224	1.9688	0.507923	0.972243
cg01072821	0.725601	1.49963	0.666833	0.971331
cg01086978	0.470251	0.000430774	2321.4	0.972409
cg01120165	0.00947072	1305.24	0.000766145	0.967458
cg01148741	0.147663	5.5154	0.18131	0.969302
cg01166674	0.160483	4.62443e-10	2.16243e+09	0.971007
cg01182585	0.00246293	686849275804120	1.45592e-15	0.969077
cg01199721	0.514144	0.000572971	1745.29	0.972191
cg01222684	0.0237608	135855	7.36076e-06	0.971017
cg01240931	0.0453079	0.0992849	10.072	0.966608
cg01252496	0.0679574	8.34803	0.119789	0.972036
cg01269795	0.400041	2.69906	0.3705	0.972633
cg01284306	0.00594135	4785.18	0.000208978	0.964659
cg01294695	0.0117522	76.0464	0.0131499	0.974307
cg01333131	0.00646994	1.83612e+06	5.44626e-07	0.962813
cg01344518	0.021509	23.7813	0.0420498	0.972662
cg01376672	0.0270125	3.54346e-22	2.8221e+21	0.970254
cg01401376	0.00313655	11.2124	0.089187	0.984203
cg01419479	0.220804	14.7217	0.067927	0.968853
cg01419675	0.0964373	3.3051e-09	3.02562e+08	0.970166
cg01465641	0.303478	1.00703e-10	9.93015e+09	0.972448
cg01520924	0.00862321	520.379	0.00192168	0.966488
cg01663968	0.0379828	3.90863e+06	2.55844e-07	0.96253
cg01677177	0.065333	1.25915e+09	7.94186e-10	0.971363
cg01723464	0.418467	4.68741e-07	2.13337e+06	0.97076
cg01743370	0.0410404	2.24582e-18	4.45272e+17	0.972084
cg01776246	0.0163255	2.4798e-19	4.03258e+18	0.968793
cg01840268	0.30496	55.1283	0.0181395	0.972283
cg01882150	0.0669756	3.61827e-11	2.76375e+10	0.975114
cg01918888	0.0296708	3.4195e-20	2.92441e+19	0.970105
cg01928902	0.288463	8.04668e-13	1.24275e+12	0.970098
cg01939479	0.228513	1.51616e-06	659560	0.971681
cg01985090	0.296836	1.14911e-11	8.7024e+10	0.972523
cg02045085	0.00156613	4.35585e+40	2.29576e-41	0.97284
cg02105377	0.405577	2.84956e-06	350932	0.971156
cg02144298	0.410284	8.83918	0.113133	0.970557
cg02154956	0.00491391	7295.74	0.000137066	0.972345
cg02196655	0.0449959	7.95397	0.125723	0.97235
cg02210123	0.0465617	46.6443	0.0214388	0.971258
cg02238747	0.0770192	603563	1.65683e-06	0.974007
cg02307482	0.0284516	3.50897e-18	2.84984e+17	0.968037
cg02322989	0.483915	0.653986	1.52909	0.969472
cg02387854	0.075135	4.63187e-23	2.15895e+22	0.970214
cg02533993	0.0376752	118937	8.40785e-06	0.970286
cg02545106	0.158283	4.93676	0.202562	0.971176
cg02593766	0.224692	6.15694	0.162418	0.97468
cg02630105	0.358826	102.383	0.00976727	0.972813
cg02630694	0.101594	172.656	0.00579187	0.969571
cg02630888	0.214399	0.186353	5.36616	0.969878
cg02648999	0.101769	517628	1.93189e-06	0.968732
cg02659232	0.00190577	2919.48	0.000342526	0.972153
cg02676865	0.0159679	6.33174	0.157934	0.97239
cg02691091	0.000668415	6.87383e+09	1.45479e-10	0.970006
cg02765328	0.135733	44.8494	0.0222968	0.973241
cg02782630	0.0517604	6943.19	0.000144026	0.974791
cg02806658	0.280051	1.09486e-07	9.13357e+06	0.970268
cg02809263	0.0766224	1.20677e-13	8.28661e+12	0.971263
cg02863947	0.0547614	17.6817	0.0565558	0.976365
cg02907300	0.0461233	4.73244e-19	2.11307e+18	0.973664
cg02947253	0.329293	0.193841	5.15886	0.968983
cg02976574	0.0172181	5.79446e+16	1.72579e-17	0.97022
cg03001305	0.236363	0.330068	3.02968	0.969023
cg03017653	0.009543	71.0688	0.0140709	0.964289
cg03021892	0.223422	4.15227	0.240832	0.9743
cg03098721	0.198927	2.67327	0.374074	0.974875
cg03135598	0.771945	0.000421745	2371.1	0.971162
cg03201604	0.119623	1.06645e-13	9.37693e+12	0.968121
cg03214697	0.0153344	6.74034	0.14836	0.967858
cg03218374	0.0177544	39.4827	0.0253276	0.974734
cg03221436	0.0687429	6.80359	0.146981	0.976312
cg03264209	0.0173769	29.2948	0.0341357	0.968708
cg03371205	0.221539	5.61308e-09	1.78155e+08	0.97124
cg03380773	0.123144	6.31191	0.158431	0.973553
cg03382797	0.322777	3.17253	0.315205	0.973792
cg03521113	0.335771	3.30811	0.302287	0.974259
cg03529436	0.0101294	3.98003e-20	2.51254e+19	0.968615
cg03600318	0.0198931	51.5754	0.0193891	0.966373
cg03622431	0.429765	64.8971	0.015409	0.972242
cg03693099	0.0160966	12.7301	0.0785542	0.975151
cg03712708	0.0145695	1.29189e+23	7.74059e-24	0.967897
cg03763616	0.00290985	9.4541	0.105774	0.969661
cg03770548	0.0356436	16.429	0.060868	0.974045
cg03803009	0.0110451	9.67124	0.103399	0.969275
cg03804568	0.00492291	2.66234e+30	3.75609e-31	0.969778
cg03812679	0.0091538	222.824	0.00448784	0.96997
cg03813215	0.149431	526.606	0.00189895	0.971158
cg03814826	0.041625	7785639470274310	1.28442e-16	0.97453
cg03860051	0.0324191	2.97976e-53	3.35598e+52	0.971457
cg03879294	0.196402	92045.4	1.08642e-05	0.97075
cg03944089	0.00653426	65.0922	0.0153628	0.972382
cg03963654	0.086206	5.64263e+06	1.77222e-07	0.972749
cg03977782	0.000548217	8.34962e+06	1.19766e-07	0.972541
cg04005725	0.258552	4.73972	0.210983	0.97377
cg04009666	0.256849	2530.09	0.000395243	0.967966
cg04032566	0.00476175	6.25373e+13	1.59905e-14	0.967204
cg04059714	0.123872	6.88604e-11	1.45221e+10	0.971999
cg04126335	0.00571081	1.46283e+13	6.83608e-14	0.97221
cg04148458	0.194333	3653.7	0.000273695	0.968979
cg04155793	0.0861663	5.49981	0.181824	0.973512
cg04349727	0.0344217	7.03586	0.142129	0.972734
cg04411625	0.0437784	143151	6.98565e-06	0.968494
cg04419707	0.0977557	1917204557168190	5.21593e-16	0.971943
cg04432009	0.0234115	5747.79	0.00017398	0.971188
cg04444006	0.055583	7.01231e-15	142606455710394	0.968791
cg04482110	0.114434	0.343939	2.90749	0.969525
cg04536575	0.0403306	477481	2.09433e-06	0.969952
cg04536998	0.080372	9.0608e-15	110365580044671	0.970521
cg04548841	0.196207	1.96945e-10	5.07756e+09	0.968868
cg04575343	0.284291	1666.25	0.000600151	0.970349
cg04582938	0.066998	9.05583	0.110426	0.971631
cg04603031	0.0939489	3.40822	0.293408	0.977283
cg04605667	0.195973	6.13182e-08	1.63084e+07	0.970858
cg04633513	0.00319574	12477.4	8.01449e-05	0.976597
cg04737319	0.0467804	1.9107e-17	5.23368e+16	0.969953
cg04747322	0.00506705	5.03595	0.198572	0.977698
cg04747619	0.250698	4.14534	0.241235	0.971685
cg04749104	0.00587562	1.01025e+26	9.89859e-27	0.966125
cg04853958	0.198819	3.56403e+11	2.80582e-12	0.972671
cg04878152	0.0391025	5.01982	0.19921	0.978169
cg04941721	0.000966334	73.5899	0.0135888	0.971503
cg04988978	0.128017	22.3223	0.0447982	0.970948
cg05040447	0.159373	1.85779e-13	5.38273e+12	0.971373
cg05070690	0.0198871	0.000968811	1032.19	0.974181
cg05086873	0.0746876	3.57629e-23	2.79619e+22	0.971042
cg05113558	0.093309	0.199269	5.01833	0.968166
cg05158538	0.055404	38.8201	0.0257598	0.973042
cg05294243	0.0347622	124.638	0.00802326	0.972481
cg05308484	0.555209	326453	3.06323e-06	0.971981
cg05367858	0.435174	7.11693e-13	1.4051e+12	0.970363
cg05417950	0.00707932	24.3906	0.0409994	0.973363
cg05444024	0.202548	14.0768	0.071039	0.972223
cg05463705	0.0503708	5.63187e-18	1.77561e+17	0.968217
cg05526376	0.1073	1.94615e-40	5.13834e+39	0.972492
cg05532892	0.00215069	4306.84	0.000232189	0.974972
cg05615150	0.0255953	0.179577	5.56863	0.966494
cg05658858	0.0393423	8.2379e-21	1.2139e+20	0.96986
cg05679613	0.0397098	224100	4.4623e-06	0.970418
cg05718625	0.00234237	56151.9	1.78088e-05	0.975303
cg05761032	0.0353325	5.0287e-39	1.98859e+38	0.969458
cg05766425	0.0593993	6.16237e-12	1.62275e+11	0.970753
cg05826823	0.201153	8.11735	0.123193	0.970205
cg05896682	0.118267	3.86455	0.258762	0.973605
cg05941634	0.193854	212402	4.70806e-06	0.971836
cg05949173	0.00830806	8.26182	0.121039	0.977284
cg05965188	0.0598459	1.22005e+06	8.19642e-07	0.971621
cg06059810	0.217187	0.00858668	116.459	0.968178
cg06117855	0.0411299	8.25297	0.121168	0.973849
cg06189653	0.129327	6.78781	0.147323	0.97263
cg06206626	0.0624755	36.3673	0.0274973	0.96777
cg06331674	0.244007	4.49249e-14	2.22594e+13	0.972993
cg06335814	0.00126349	4.80736e+22	2.08015e-23	0.963692
cg06385087	0.00705561	7696.76	0.000129925	0.964644
cg06418878	0.385572	9.87604e-09	1.01255e+08	0.972265
cg06438404	0.0419762	2.66719e-13	3.74926e+12	0.968531
cg06463913	0.0216341	3.93031e+16	2.54433e-17	0.970309
cg06489804	0.202924	1.1252e-09	8.88732e+08	0.971733
cg06547766	0.354883	2.27972	0.43865	0.973458
cg06577463	0.0205271	1.75123e-16	5710264189004140	0.967077
cg06638433	0.0816436	2.85199	0.350632	0.975905
cg06640279	0.316754	2.72159	0.367432	0.974216
cg06654134	0.0477145	2.83915e-21	3.52218e+20	0.973053
cg06723357	0.0038466	76.5655	0.0130607	0.973091
cg06738602	0.135137	4.08564	0.24476	0.972538
cg06797533	0.00675901	9.11792	0.109674	0.975921
cg06799664	0.0669747	10.1617	0.0984084	0.972535
cg06834261	0.0185219	4.97503e-27	2.01004e+26	0.974894
cg06855803	0.109782	11.712	0.0853828	0.973601
cg06905862	0.00657748	10813.2	9.24793e-05	0.972512
cg06919956	0.030402	1.72026e-24	5.81309e+23	0.969443
cg07039362	0.0403443	5.79319	0.172617	0.971191
cg07052880	0.0486164	525.586	0.00190264	0.971167
cg07059403	0.193836	4.16971e-08	2.39825e+07	0.971958
cg07105440	0.0689587	2.09899e+07	4.7642e-08	0.968372
cg07138512	0.0285224	3684.13	0.000271434	0.96619
cg07148914	0.0160663	213.571	0.00468228	0.974313
cg07173760	0.0059418	15.5536	0.0642937	0.968081
cg07207937	0.220944	229.16	0.00436375	0.970378
cg07293947	0.0181183	1672.44	0.000597928	0.970962
cg07294774	0.0365591	24.9278	0.0401159	0.968414
cg07326074	0.00192834	6.19871e-20	1.61324e+19	0.964677
cg07341907	0.00543518	3.11777e+07	3.20742e-08	0.972067
cg07366967	0.306597	194.444	0.00514287	0.971626
cg07374928	0.0301165	2.22113e+06	4.50222e-07	0.966355
cg07379574	0.0669091	0.229284	4.36139	0.96702
cg07442479	0.104464	8.79638	0.113683	0.973336
cg07448499	0.0163576	1.26837e+10	7.88414e-11	0.966103
cg07476030	0.197662	3.58279	0.279112	0.970493
cg07509155	0.00615982	82.1691	0.01217	0.968782
cg07520161	0.0369499	1.97981e+09	5.05098e-10	0.969582
cg07549630	0.0859111	2.89216e-31	3.45762e+30	0.972487
cg07603484	0.0197647	2826.96	0.000353737	0.969652
cg07625840	0.181094	30.0363	0.033293	0.972136
cg07675682	0.0209742	225.406	0.00443644	0.970285
cg07713493	0.0582581	20.3754	0.0490787	0.971471
cg07748017	0.0661565	1.57382e+06	6.35397e-07	0.964448
cg07764959	0.369664	52.0519	0.0192116	0.971334
cg07777378	0.0397929	252840544296282	3.95506e-15	0.967757
cg07823755	0.18395	0.0350301	28.5469	0.970951
cg07842593	0.026141	5.87067e+13	1.70338e-14	0.970434
cg07844572	0.123453	153389	6.51938e-06	0.966395
cg07864297	0.0176937	0.180575	5.53787	0.967114
cg07886712	0.00725297	3.15189e+06	3.1727e-07	0.96768
cg07894717	0.236875	19.1711	0.0521618	0.97123
cg07909422	0.039848	3.4033e-13	2.93832e+12	0.971974
cg07925687	0.279528	1.321e-09	7.57005e+08	0.971857
cg07967643	0.0274669	2.21555e-23	4.51355e+22	0.967199
cg07997737	0.00383099	18.1673	0.055044	0.961307
cg08069899	0.033975	1496.04	0.000668433	0.972267
cg08164315	0.0235507	9.33275e-62	1.0715e+61	0.966863
cg08229627	0.189464	1.24265e-18	8.04731e+17	0.970722
cg08233088	0.0311942	4.39357e-15	227605095364209	0.96834
cg08303146	0.262113	948.974	0.00105377	0.970363
cg08317263	0.00596059	35.7848	0.0279448	0.968746
cg08341924	0.223968	5.98383	0.167117	0.972801
cg08360728	0.0658369	4.08892e-07	2.44563e+06	0.975039
cg08434547	0.130943	810.011	0.00123455	0.969321
cg08441546	0.0225426	74.0068	0.0135123	0.970587
cg08461397	0.0282717	725610455417759	1.37815e-15	0.968786
cg08538752	0.00507768	0.00425851	234.824	0.963023
cg08617916	0.0237847	5175.83	0.000193206	0.970771
cg08675664	0.000735771	269.485	0.00371078	0.972349
cg08703971	0.00535741	5620.66	0.000177915	0.97687
cg08704509	0.00829848	3880.63	0.00025769	0.972581
cg08733315	0.217965	5.14609e-13	1.94322e+12	0.971721
cg08749122	0.0273121	2.48742e-29	4.02022e+28	0.968667
cg08779777	0.128305	4.53618	0.22045	0.972548
cg08878304	0.191514	3.80219e-11	2.63006e+10	0.971916
cg08884343	0.0910896	18.1298	0.0551579	0.973037
cg09037813	0.00572016	20.0421	0.049895	0.967235
cg09056317	0.00845823	48.9287	0.0204379	0.968025
cg09065199	0.00310683	2.96196e+06	3.37614e-07	0.971903
cg09080746	0.0132593	5179482349831580	1.93069e-16	0.973092
cg09089053	0.465215	2.13262	0.468907	0.970973
cg09099177	0.090711	854.722	0.00116997	0.974611
cg09107315	0.0127906	69.9486	0.0142962	0.965274
cg09212468	0.0102652	2388.8	0.000418621	0.971939
cg09234474	0.0038719	413.501	0.00241837	0.967912
cg09244244	0.00161698	87.0359	0.0114895	0.971054
cg09282338	0.414228	397000	2.51889e-06	0.971621
cg09312149	0.00384668	106.558	0.00938459	0.965806
cg09313439	0.0713874	4.23281	0.23625	0.976302
cg09321965	0.0231672	2998.42	0.000333509	0.971252
cg09432376	0.0973088	7.73209	0.129331	0.970786
cg09475324	0.00772875	2.06487e+21	4.84291e-22	0.969059
cg09515805	0.138234	3.17623e-17	3.14838e+16	0.971067
cg09529667	0.187934	198312	5.04255e-06	0.970193
cg09547190	0.20455	7.57621	0.131992	0.969735
cg09580336	0.0017603	26.2463	0.0381007	0.970262
cg09594067	0.407209	10.6295	0.0940774	0.97149
cg09686308	0.10191	0.0749747	13.3378	0.968886
cg09712527	0.0184198	16.5975	0.0602502	0.975261
cg09736922	0.376067	4.29545	0.232805	0.973625
cg09744051	0.203763	0.333775	2.99603	0.97168
cg09757107	0.225064	6.31828e-10	1.58271e+09	0.971152
cg09772827	0.0632549	116231	8.60355e-06	0.972746
cg09773756	0.00302077	10.5082	0.0951639	0.970971
cg09793866	0.0254308	17.6199	0.0567541	0.969884
cg09805010	0.157657	2.7603	0.36228	0.975461
cg09834162	0.0608082	2.92825e+11	3.41501e-12	0.9673
cg09852871	0.174996	5.42653	0.18428	0.974067
cg09867157	0.198377	1.64653e-16	6073385839553790	0.969892
cg09893305	0.000346206	19.8146	0.0504679	0.977827
cg10011232	0.130805	10586.3	9.44621e-05	0.967113
cg10025865	0.013726	19.775	0.0505688	0.966967
cg10038087	0.989831	1.30981	0.76347	0.971113
cg10141022	0.114444	2.51989e-21	3.96843e+20	0.972973
cg10145725	0.0354616	1.32333e+10	7.5567e-11	0.970674
cg10189763	0.00540214	21.3175	0.0469098	0.967066
cg10235741	0.0416932	2.55856e-08	3.90845e+07	0.969625
cg10253484	0.183891	1.03065e-07	9.70261e+06	0.973811
cg10326447	0.0222721	4.18194e+20	2.39123e-21	0.970016
cg10331048	0.0427673	4.3364e+06	2.30606e-07	0.967113
cg10367730	0.021571	1.55481e-23	6.43164e+22	0.969178
cg10396357	0.0613626	1.78868e-21	5.59071e+20	0.972037
cg10414058	0.0145926	13.4711	0.074233	0.970898
cg10451565	0.0438577	7.54719	0.1325	0.972243
cg10490064	0.16931	146.112	0.00684408	0.974545
cg10516886	0.191015	4.81033	0.207886	0.971699
cg10528989	0.0534399	10.8892	0.0918345	0.970298
cg10579246	0.314878	6.85777	0.14582	0.971313
cg10628098	0.149429	1775.62	0.000563184	0.970299
cg10648908	0.241739	7.01907e-05	14246.9	0.971047
cg10662787	0.0659054	226151	4.42182e-06	0.970719
cg10703331	0.370942	0.000246719	4053.19	0.970467
cg10784067	0.886511	0.370661	2.69788	0.970971
cg10857807	0.0393056	1.9232e-108	5.19966e+107	0.969326
cg10934032	0.385889	3.00463	0.33282	0.971622
cg10986043	0.237803	7.01226	0.142607	0.972
cg11018904	0.258382	3.37984e-06	295872	0.971544
cg11050116	0.103661	1.71216e+16	5.84059e-17	0.972607
cg11063988	0.635774	8.40834	0.11893	0.971048
cg11091262	0.0681186	7.42101	0.134753	0.97132
cg11094938	0.409316	12.4544	0.0802927	0.972682
cg11119596	0.0123373	18.9306	0.0528244	0.970154
cg11212609	0.278114	9.67291e-06	103381	0.971611
cg11221132	0.209575	12.5761	0.0795158	0.972684
cg11231018	0.0711236	31897.3	3.13506e-05	0.972245
cg11278262	0.00920045	326.414	0.00306359	0.971126
cg11313997	0.12707	148431	6.73713e-06	0.97023
cg11318251	0.178093	3.15543	0.316914	0.973478
cg11326613	0.0095845	1.06974e+08	9.3481e-09	0.96637
cg11378052	0.118399	5.63327	0.177517	0.972485
cg11380624	0.0548263	44.0327	0.0227104	0.969889
cg11443787	0.108196	1.62579e-10	6.15087e+09	0.97263
cg11502800	0.0201285	1.32649e+16	7.53869e-17	0.970723
cg11505048	0.163925	2.93889	0.340264	0.971807
cg11526405	0.0377108	8.48329e-24	1.17879e+23	0.971115
cg11527279	0.0969178	18.8721	0.0529884	0.972185
cg11577097	0.116703	8.98106	0.111345	0.971862
cg11582100	0.0801257	8.28709e+07	1.2067e-08	0.972436
cg11584111	0.029541	2.32589e+12	4.29943e-13	0.969894
cg11612291	0.0928598	10.9162	0.0916069	0.972995
cg11784281	0.0234794	0.00981497	101.885	0.968042
cg11819637	0.457639	2.35716	0.42424	0.97295
cg11840540	0.0177011	100.096	0.00999044	0.970797
cg11879577	0.00671649	54.3343	0.0184046	0.971493
cg11959821	0.0327776	7.3431e-27	1.36182e+26	0.97125
cg12032116	0.110354	3.6924e-18	2.70827e+17	0.972978
cg12045829	0.0138374	15.3467	0.0651604	0.972205
cg12119029	0.1812	9.7411	0.102658	0.972238
cg12242338	0.0320323	5.19858	0.19236	0.972153
cg12320306	0.0992495	867.011	0.00115339	0.967313
cg12360736	0.0804337	4.87032	0.205326	0.96949
cg12382902	0.0649546	60.8082	0.0164451	0.973425
cg12400881	0.41554	958.918	0.00104284	0.969564
cg12478809	0.174652	347787	2.87532e-06	0.972406
cg12529801	0.177265	296284	3.37514e-06	0.973723
cg12530021	0.0265355	11.5935	0.0862555	0.97223
cg12548064	0.235186	3.58451e-12	2.78978e+11	0.972599
cg12549513	0.446415	0.618646	1.61643	0.970961
cg12576700	0.286164	2575.06	0.00038834	0.971696
cg12582008	0.0200308	4.57267	0.218691	0.973104
cg12611860	0.0202678	2.36563e+09	4.2272e-10	0.974861
cg12631737	0.0705168	3.65116e-16	2738852938431660	0.971837
cg12654845	0.288721	4.09234	0.244359	0.973837
cg12658982	0.0149066	4.16008e+27	2.4038e-28	0.974601
cg12683641	0.00823596	0.0108378	92.2697	0.968484
cg12693135	0.0838313	9.53226e-59	1.04907e+58	0.972011
cg12743398	0.316964	2.93447	0.340777	0.974391
cg12745769	0.750044	1.47978	0.675778	0.971557
cg12784172	0.0538464	0.000282092	3544.94	0.971392
cg12897370	0.421026	7.7725e-06	128659	0.971389
cg12927153	0.00572014	2.52622e+07	3.95849e-08	0.971534
cg12951282	0.295245	5.62214	0.177868	0.971671
cg12994003	0.325381	0.000118224	8458.52	0.972537
cg13062935	0.222725	3.59752	0.277969	0.974865
cg13109289	0.00851884	7.90603e+10	1.26486e-11	0.97089
cg13176285	0.488069	4235.09	0.000236123	0.971289
cg13176979	0.097164	6.50304	0.153774	0.968119
cg13219107	0.242486	1.05715e-09	9.45942e+08	0.969541
cg13222081	0.546895	35.6143	0.0280786	0.971217
cg13225039	0.464008	0.000171434	5833.16	0.971686
cg13236854	0.0668879	2.44551e-30	4.08913e+29	0.971909
cg13243219	0.0491107	6.8385e-14	1.46231e+13	0.968761
cg13243377	0.244553	8.79436e-09	1.13709e+08	0.971297
cg13351161	0.0677326	8.60465	0.116216	0.970003
cg13360150	0.840724	2.15969	0.46303	0.97126
cg13414044	0.0658837	5.72897e-24	1.74551e+23	0.969866
cg13421924	0.310181	2.4741e-07	4.04188e+06	0.970642
cg13438543	0.521056	7.59043e-05	13174.5	0.970753
cg13451483	0.307405	594589	1.68183e-06	0.971588
cg13496066	0.0305489	7.65957e+07	1.30556e-08	0.973825
cg13515674	0.0213332	9.50803e+08	1.05174e-09	0.97085
cg13518327	0.125563	3.46955	0.288222	0.97583
cg13553498	0.0887541	107.931	0.00926522	0.973592
cg13605690	0.000193361	9.82205e+35	1.01812e-36	0.966376
cg13613748	0.0148374	447.467	0.0022348	0.970733
cg13665184	0.0934628	7.65688e-07	1.30602e+06	0.973141
cg13760546	0.727387	8.65932e-05	11548.3	0.97085
cg13782957	0.133523	1.25829e-06	794729	0.971747
cg13796218	0.000898323	637733	1.56805e-06	0.971077
cg13801381	0.0423104	28.3855	0.0352292	0.970554
cg13812587	0.0087864	748.564	0.00133589	0.96742
cg13859324	0.00250338	18.2825	0.0546971	0.972907
cg13881341	0.00442383	25.0917	0.0398539	0.967759
cg13908523	0.000227379	7.26618e+57	1.37624e-58	0.966124
cg13935507	0.0114994	2.27966e-15	438661558671390	0.965339
cg13982505	0.0909916	157.279	0.00635814	0.969811
cg14001567	0.0474081	22.42	0.0446031	0.974796
cg14003467	0.0172913	8.83716e+16	1.13158e-17	0.968788
cg14086033	0.0285727	1.09748e-15	911179320115968	0.97168
cg14115004	0.0690319	1624.64	0.000615522	0.971908
cg14116596	0.216814	3.83452	0.260788	0.971455
cg14120784	0.0581813	62.0375	0.0161193	0.967024
cg14126210	0.160143	5.87531e-55	1.70204e+54	0.971832
cg14159672	0.0150134	0.204698	4.88526	0.964509
cg14163776	0.121211	7.05227	0.141798	0.968915
cg14168975	0.520185	1.60361	0.623592	0.972087
cg14181459	0.249681	1.22107e-11	8.18955e+10	0.970974
cg14198172	0.0968743	609474	1.64076e-06	0.970311
cg14205126	0.253352	2.99118e-16	3343160898812740	0.972138
cg14211646	0.0552921	3.34327e-10	2.99108e+09	0.969995
cg14308452	0.040689	26.3069	0.0380128	0.970717
cg14311811	0.0333059	259.593	0.00385218	0.967646
cg14318370	0.0697591	8.68198	0.115181	0.970212
cg14423778	0.231056	5.14949	0.194194	0.972902
cg14438174	0.00906472	1.78052e-47	5.61632e+46	0.969566
cg14446808	0.157217	2.4633e-06	405959	0.971775
cg14494313	0.128802	3.69502	0.270634	0.971815
cg14532519	0.0586857	2819.59	0.000354661	0.972721
cg14579051	0.0261893	7.9855	0.125227	0.975698
cg14651992	0.0621962	112.735	0.00887038	0.975965
cg14654875	0.00251173	73.9546	0.0135218	0.973838
cg14706739	0.507385	2.73647	0.365435	0.973229
cg14709481	0.00768914	20.6476	0.0484318	0.966734
cg14719352	0.0437709	22.6804	0.044091	0.97007
cg14737977	0.152382	2983.56	0.00033517	0.96649
cg14823109	0.00532643	2.65355e+29	3.76853e-30	0.973335
cg14837165	0.0684921	17.0617	0.0586108	0.974022
cg14865516	0.00441694	7.05421e+11	1.41759e-12	0.966708
cg14885742	0.00232769	130.499	0.0076629	0.967537
cg14887509	0.219628	6.32698e-10	1.58053e+09	0.969758
cg14893161	0.0138332	0.143122	6.98704	0.96514
cg14902389	0.0158141	0.0668066	14.9686	0.971391
cg14908548	0.00159803	3.30355e+22	3.02705e-23	0.967945
cg14972143	0.305046	16.2494	0.0615406	0.970353
cg14973995	0.184405	0.325856	3.06884	0.972433
cg15009698	0.0124112	1.74858e+08	5.71894e-09	0.967766
cg15043057	0.0229594	7.61839	0.131261	0.976272
cg15070798	0.459026	2987.4	0.00033474	0.971276
cg15187606	0.208215	13.7383	0.072789	0.973295
cg15240064	0.103539	1702.39	0.00058741	0.968695
cg15248035	0.333195	3.87523	0.258049	0.971848
cg15269863	0.0493181	1.98582e-13	5.03571e+12	0.97208
cg15293750	0.401214	725580	1.37821e-06	0.971394
cg15319076	0.121053	2.63182e-19	3.79965e+18	0.970375
cg15379237	0.00573476	1.81312e-23	5.51536e+22	0.97043
cg15385623	0.559714	2.11739	0.472279	0.972555
cg15473904	0.0190524	312.508	0.00319992	0.966529
cg15489422	0.00515689	6.1183e+07	1.63444e-08	0.97043
cg15502888	0.0212324	6.11715e-25	1.63475e+24	0.968326
cg15552238	0.133721	3.92158	0.254999	0.971446
cg15555014	0.283384	5.8614	0.170608	0.969701
cg15558658	0.26752	5.42185e-07	1.84439e+06	0.970748
cg15611364	0.00187236	779266	1.28326e-06	0.972781
cg15612546	0.0524573	8.11772e-24	1.23187e+23	0.972104
cg15612847	0.0479379	3148.67	0.000317594	0.975149
cg15639045	0.0642743	181.001	0.00552483	0.970059
cg15692239	0.0709957	2.02025e-26	4.94988e+25	0.970565
cg15693736	0.0278597	4.90044e+18	2.04063e-19	0.968649
cg15701622	0.0779075	2.65511e-19	3.76632e+18	0.970916
cg15737168	0.0799725	0.147497	6.77982	0.969363
cg15786837	2.39081e-05	640.792	0.00156057	0.975355
cg15852891	0.141446	3.56101	0.280819	0.977021
cg15982308	0.0144914	1.45292e-26	6.88267e+25	0.965148
cg15991288	0.175056	2.39976e-09	4.16707e+08	0.97246
cg15993674	0.496472	0.508179	1.96781	0.970528
cg16004226	0.0787673	3.94742	0.25333	0.973479
cg16022279	0.207178	3.11876	0.32064	0.974392
cg16063666	0.0984054	9.32485	0.10724	0.974071
cg16107172	0.108281	9.19153	0.108796	0.975511
cg16169604	0.0288898	9.47304	0.105563	0.973326
cg16179125	0.0132592	2.05481e+23	4.86662e-24	0.964657
cg16256610	0.498134	3.5628e-06	280678	0.97126
cg16272420	0.572755	2.05916	0.485635	0.973126
cg16293088	0.329964	8.52689e-06	117276	0.971223
cg16338035	0.342599	47.3027	0.0211404	0.970548
cg16343696	0.430182	5.58828e-10	1.78946e+09	0.97
cg16356516	0.0104116	5.00552e+26	1.99779e-27	0.971543
cg16381752	0.145853	1.65952e-09	6.02583e+08	0.970721
cg16414852	0.115147	5.1869	0.192793	0.972925
cg16504670	0.0396695	8.28806	0.120656	0.973057
cg16570917	0.0503882	25.1387	0.0397794	0.973517
cg16606185	0.0901519	1.32633e-38	7.53959e+37	0.96972
cg16632280	0.025883	22.659	0.0441326	0.971921
cg16648841	0.123657	4.04842	0.24701	0.972544
cg16718094	0.162782	3.81164e-12	2.62355e+11	0.974949
cg16756620	0.212771	1.41019e-14	7.09122e+13	0.972102
cg16756998	0.012151	75.514	0.0132426	0.973479
cg16799961	0.238859	8.74794e-14	1.14313e+13	0.972691
cg16807911	0.0237659	3417.11	0.000292645	0.969249
cg16833230	0.0674227	1838.09	0.000544043	0.972063
cg16891895	0.155732	115969	8.623e-06	0.970102
cg16904599	0.0407238	1247.32	0.00080172	0.968792
cg16932672	0.0267294	23277.5	4.296e-05	0.968968
cg16956268	0.122192	91374.3	1.0944e-05	0.971447
cg16970828	0.024828	4102.35	0.000243763	0.965869
cg16994506	0.0250741	104.501	0.0095693	0.972351
cg17001430	0.0894789	9.92666	0.100739	0.972065
cg17051440	0.25706	3.12103	0.320407	0.973792
cg17251713	0.315625	4.16279	0.240224	0.970859
cg17258195	0.0924184	0.0470824	21.2394	0.966224
cg17328659	0.140149	5.86926	0.170379	0.971688
cg17329249	0.000171013	120.096	0.00832668	0.975822
cg17460386	0.765442	1.408	0.710228	0.971886
cg17460846	0.106822	1.81112e+09	5.52144e-10	0.968822
cg17480438	0.483336	3.02995	0.330038	0.97285
cg17518965	0.352486	5.16313	0.193681	0.972231
cg17542835	0.0129445	4.50073e+10	2.22186e-11	0.974106
cg17575811	0.226477	2004.65	0.000498841	0.970931
cg17589341	0.500427	2.0208	0.494853	0.971556
cg17628717	0.449038	2.19197	0.45621	0.973057
cg17701886	0.317927	3.09305e-09	3.23306e+08	0.972607
cg17725461	0.529467	0.000180864	5529.02	0.97176
cg17767184	0.051165	2.63702e-19	3.79216e+18	0.974855
cg17788832	0.0354402	17.1802	0.0582066	0.974781
cg17791766	0.0107758	1.06686e-16	9373293748520670	0.966513
cg17792192	0.0237026	1380619791231310	7.24312e-16	0.971945
cg17808849	0.0145628	2.59317e+11	3.85628e-12	0.964746
cg17838626	0.100677	40.1956	0.0248784	0.972808
cg17838765	0.676367	1.5239	0.656213	0.972065
cg17854497	0.00457049	4.55683e-12	2.19451e+11	0.971841
cg17860158	0.011137	9.50976	0.105155	0.972647
cg17872064	0.311164	1.46483e-18	6.82671e+17	0.971609
cg17877656	0.470112	7.09964	0.140852	0.971669
cg17886028	0.0833529	131.421	0.00760911	0.973979
cg17886959	0.109961	6.35592	0.157334	0.970785
cg17959722	0.0505947	145.641	0.00686621	0.96747
cg17960516	0.0231978	3.29326e+09	3.0365e-10	0.970669
cg17989037	0.291192	5.85999e-12	1.70649e+11	0.97195
cg18015677	0.269539	30909.7	3.23523e-05	0.971668
cg18023080	0.0274303	9.40719	0.106302	0.972539
cg18056600	0.0559484	128.874	0.00775953	0.966184
cg18061485	0.242294	3.09395e-11	3.23211e+10	0.970381
cg18085517	0.385862	3.64449	0.274387	0.971969
cg18140857	0.310661	4.32215	0.231366	0.974216
cg18149207	0.00343768	74.744	0.013379	0.974366
cg18152311	0.157372	1.6863e-10	5.93016e+09	0.970568
cg18180155	0.371498	2.07416	0.482123	0.973901
cg18195628	0.224213	1.05515e-11	9.47729e+10	0.968479
cg18206040	0.188047	4.29931e-15	232595711154249	0.968095
cg18211447	0.0761402	4.91487e-11	2.03464e+10	0.969968
cg18340214	0.00144249	2.47543e+21	4.03971e-22	0.971785
cg18353563	0.0198405	82.5926	0.0121076	0.967266
cg18380974	0.0077622	14708.6	6.79874e-05	0.968176
cg18397523	0.000238325	16.9708	0.0589247	0.978326
cg18477315	0.0355694	2.64643e+11	3.77867e-12	0.972975
cg18508125	0.0524179	80.0939	0.0124854	0.97029
cg18530716	0.0120267	38.6351	0.0258832	0.970131
cg18565479	0.0166517	623.809	0.00160306	0.969266
cg18573251	0.0128003	12.2407	0.0816944	0.971938
cg18589858	0.0885148	14.1909	0.0704676	0.976286
cg18652852	0.0190391	6.69511e-23	1.49363e+22	0.969463
cg18655584	0.106351	112.281	0.00890621	0.971866
cg18669588	0.528587	2.57982	0.387623	0.972397
cg18680834	0.0142241	17.3137	0.0577579	0.970079
cg18855178	0.602355	50.5772	0.0197717	0.971224
cg18875839	0.537336	4.75148e-05	21046.1	0.971559
cg18885346	0.119568	5.21417	0.191785	0.974433
cg18956095	0.0896736	1.05517e-07	9.47714e+06	0.970929
cg18962105	0.0477915	14.9911	0.0667061	0.972632
cg18993334	0.0930842	49.042	0.0203907	0.969497
cg19008809	0.0682614	3242.96	0.00030836	0.968821
cg19032144	0.304992	9.74174e+06	1.02651e-07	0.971459
cg19044674	0.0397308	3.09033e-11	3.2359e+10	0.969648
cg19094438	0.159564	3.98831	0.250733	0.974364
cg19098314	0.0526254	3.14182e-11	3.18287e+10	0.970252
cg19108718	0.0526463	9.21716e+07	1.08493e-08	0.967612
cg19123863	0.411693	1.84329e-14	5.42508e+13	0.972496
cg19125606	0.00285392	13.5799	0.0736381	0.977301
cg19130550	0.0901064	1.15208e+12	8.67994e-13	0.970104
cg19167673	0.115143	0.0330147	30.2895	0.971056
cg19175383	0.0401405	4.59519e-20	2.17619e+19	0.969809
cg19184963	0.0510294	42974.9	2.32694e-05	0.969065
cg19205041	0.0351336	0.0106118	94.2347	0.970637
cg19220825	0.105168	111.146	0.00899719	0.9679
cg19221369	0.0825618	94204.5	1.06152e-05	0.971011
cg19262019	0.288652	2.19593e-05	45538.7	0.970341
cg19328294	0.0887659	676.414	0.00147839	0.969012
cg19390148	0.402897	3.65972e-11	2.73245e+10	0.970077
cg19434066	0.291946	1.35996e-09	7.35316e+08	0.972014
cg19434303	0.0942978	557.766	0.00179287	0.971294
cg19461621	0.084635	4.925	0.203046	0.97528
cg19485804	0.287832	2.41393	0.414263	0.972678
cg19511844	0.0641074	9.21096	0.108566	0.971838
cg19549068	0.630303	0.000282735	3536.89	0.971478
cg19584957	0.0326629	1.98404e+06	5.04021e-07	0.972465
cg19669439	0.138357	1.13935e-20	8.77691e+19	0.970152
cg19691797	0.638534	1.94212e-05	51490	0.970933
cg19724470	0.416276	2.95433	0.338486	0.970181
cg19751951	0.0514904	2.65176e-13	3.77108e+12	0.970488
cg19771482	0.566453	1.07264e-09	9.32279e+08	0.971685
cg19778698	0.00150517	8014.31	0.000124777	0.961366
cg19779211	0.00517705	2946.28	0.000339411	0.965837
cg19814116	0.583608	2.63569	0.379408	0.97023
cg19815589	0.00327823	2.12113e+16	4.71448e-17	0.966284
cg19823847	0.0679052	3.70086	0.270208	0.972007
cg19841506	0.163514	41.6216	0.024026	0.968421
cg19875047	0.0484757	7.71566e+11	1.29607e-12	0.968687
cg19895197	0.0547336	229055	4.36577e-06	0.968534
cg19948014	0.0123142	1.30951e+24	7.63646e-25	0.968015
cg19963797	0.142691	0.309748	3.22843	0.974875
cg19995014	0.144674	0.332104	3.01111	0.968767
cg20022511	0.0435897	4.01819e-17	2.48868e+16	0.969914
cg20070077	0.0123133	627997384467774	1.59236e-15	0.970856
cg20120491	0.164119	4.39474	0.227545	0.973982
cg20154346	0.361183	2.17349	0.460091	0.972931
cg20172280	0.136567	18.2544	0.0547813	0.968194
cg20195812	0.0204234	32.8507	0.0304407	0.972604
cg20225915	0.00226594	4841.49	0.000206548	0.965618
cg20247048	0.0125158	169.641	0.0058948	0.967423
cg20259398	0.00454284	3.28187e+08	3.04704e-09	0.972652
cg20282199	0.0600059	22019.3	4.54148e-05	0.969937
cg20295000	0.278226	3.61256e-18	2.76812e+17	0.971366
cg20357806	0.00320224	0.009417	106.191	0.96417
cg20379125	0.0050886	47725.1	2.09533e-05	0.974645
cg20401945	0.62299	0.559844	1.78621	0.970685
cg20443314	0.494392	40.6704	0.0245879	0.970796
cg20452583	0.0450661	3.80695e+16	2.62678e-17	0.967952
cg20492121	0.00143182	192.667	0.00519029	0.968999
cg20612559	0.104333	2.51201e+17	3.98087e-18	0.971909
cg20645065	0.0568512	8.33788	0.119935	0.975462
cg20717059	0.477448	1.4478e-05	69070.3	0.971516
cg20724073	0.135309	5.50266e+07	1.8173e-08	0.970279
cg20751395	0.391037	0.0459843	21.7465	0.97246
cg20803370	0.397775	6.8647e-08	1.45673e+07	0.971304
cg20822579	0.0541582	2227.03	0.000449029	0.968875
cg20854748	0.0466402	1.23293e-20	8.11075e+19	0.969976
cg20861607	0.0571202	41.3171	0.024203	0.970974
cg20902737	0.298149	4.33905e-05	23046.5	0.971983
cg20966551	0.022534	3009.84	0.000332244	0.970309
cg20970875	0.241175	41.5984	0.0240394	0.97247
cg20979602	0.289832	805.341	0.00124171	0.971655
cg20985014	0.0510616	23.9121	0.0418198	0.97365
cg20987610	0.398154	16.1046	0.0620941	0.973413
cg20988728	0.174297	8.62289e-14	1.1597e+13	0.971144
cg20993403	0.0831431	4.62192	0.21636	0.968015
cg21008828	0.2165	18.7319	0.0533849	0.968043
cg21051046	0.370486	2.06603	0.484021	0.975748
cg21123509	0.204432	1.76863e-08	5.65409e+07	0.971081
cg21211748	0.270899	3.08273e-09	3.24388e+08	0.971708
cg21212956	0.144852	93.4972	0.0106955	0.971323
cg21218093	0.295317	1.01142e+06	9.8871e-07	0.972322
cg21224049	0.0049245	7.30402e-11	1.36911e+10	0.970129
cg21256656	0.0349616	12900.5	7.75161e-05	0.970876
cg21330703	0.0566849	6.90455	0.144832	0.973693
cg21339926	0.0448575	141771	7.05364e-06	0.965615
cg21370143	0.0654864	0.0308986	32.364	0.969128
cg21439450	0.0693879	1.50492e-17	6.64488e+16	0.967399
cg21468416	0.0145257	96.3767	0.010376	0.971303
cg21481775	0.0497283	4.52001	0.221238	0.973544
cg21488617	0.0380148	12.3623	0.080891	0.975226
cg21540749	0.0583417	6.13691e-24	1.62948e+23	0.972666
cg21567017	0.0103215	777.947	0.00128544	0.975877
cg21571937	0.00478875	10023.1	9.97693e-05	0.971246
cg21586107	0.30368	1.13977e-09	8.77371e+08	0.969754
cg21610192	0.00465231	1.2666e+19	7.89516e-20	0.967453
cg21639401	0.410369	2.86409	0.349151	0.973074
cg21667836	0.0266638	7.14929	0.139874	0.97011
cg21681756	0.368716	2581.75	0.000387334	0.970981
cg21685565	0.0304792	558.326	0.00179107	0.969362
cg21690892	0.0540641	3.80253e+11	2.62983e-12	0.973959
cg21692936	0.124606	53097.9	1.88331e-05	0.969749
cg21746459	0.036869	5.87076e+18	1.70336e-19	0.973379
cg21792432	0.0764258	427.479	0.0023393	0.977294
cg21794225	0.0121537	7.06153	0.141612	0.969018
cg21800088	0.131314	3.59362e-09	2.78271e+08	0.971454
cg21803417	0.140026	1.03964e-14	9.61871e+13	0.971488
cg21844956	0.000911883	1.05984e+06	9.43537e-07	0.968978
cg21869532	0.0821543	2080.83	0.000480576	0.969752
cg21877855	0.0243783	550479431848608	1.8166e-15	0.96705
cg21922841	0.00035715	2.51367e+06	3.97825e-07	0.968731
cg21989500	0.0581125	6.9261e-15	144381449167273	0.971186
cg22004151	0.365778	2.4786e-15	403452984398870	0.970452
cg22009489	0.0626293	759466	1.31672e-06	0.97027
cg22012054	0.0227161	2.08164e-24	4.8039e+23	0.968497
cg22082243	0.109562	6.7629e-16	1478656103953720	0.969905
cg22166290	0.000697022	444.1	0.00225174	0.969055
cg22175764	0.0282015	3.3818	0.295701	0.974576
cg22176895	0.00108755	184494	5.42024e-06	0.967001
cg22183626	0.209411	2.4505e-07	4.0808e+06	0.970306
cg22190705	0.207346	103.403	0.0096709	0.970933
cg22201387	0.107405	2.48772e-20	4.01975e+19	0.970903
cg22220722	0.321596	2.73246	0.36597	0.971743
cg22321558	0.051025	840.745	0.00118942	0.969353
cg22438324	0.161085	2.00491e-11	4.98775e+10	0.970826
cg22448677	0.1197	3.81701e+07	2.61985e-08	0.971341
cg22451189	0.0840294	5.57346e-39	1.79422e+38	0.968011
cg22461018	0.0938652	6.52922	0.153158	0.972964
cg22493172	0.0771016	1.86154e-12	5.3719e+11	0.970754
cg22527345	0.046786	9.81572	0.101877	0.974342
cg22552168	0.322751	59.3483	0.0168497	0.973274
cg22572214	0.112955	5.81466e-18	1.71979e+17	0.971659
cg22579849	0.415262	55.8119	0.0179173	0.972805
cg22606869	0.0151956	3.77678e-22	2.64776e+21	0.972358
cg22631938	0.126795	3.41251	0.293039	0.972204
cg22637507	0.916378	1.12657	0.887653	0.971319
cg22705929	0.251344	2.8666	0.348845	0.974088
cg22764341	0.00259676	975.685	0.00102492	0.968943
cg22805632	0.168532	3.51218	0.284724	0.974577
cg22845362	0.137081	1.30646e-20	7.65427e+19	0.971758
cg22936016	0.0779334	3.03531e-10	3.29456e+09	0.971719
cg23029491	0.179076	6.37563e-17	1.56847e+16	0.972529
cg23033845	0.241023	0.175734	5.69041	0.970222
cg23070585	0.118349	2.79743e-27	3.57471e+26	0.973208
cg23082877	0.0819322	7.27779	0.137404	0.971026
cg23092072	0.062124	1.61791e-22	6.18082e+21	0.970418
cg23106864	0.179147	3.34398e-19	2.99045e+18	0.974095
cg23191772	0.591138	55.1578	0.0181298	0.971904
cg23243617	0.172334	17.0078	0.0587965	0.973524
cg23248865	0.033643	6.70906e-57	1.49052e+56	0.968803
cg23265096	0.0357974	24.2534	0.0412313	0.971134
cg23361608	0.284859	3.3562e-13	2.97956e+12	0.970251
cg23427565	0.0447963	8.92207e+11	1.12082e-12	0.972727
cg23446109	0.000592092	1891.87	0.000528576	0.972809
cg23663332	0.0512537	12.2874	0.0813841	0.972076
cg23667933	0.0216188	2.35235e-19	4.25107e+18	0.971255
cg23668631	0.144544	8.26399	0.121007	0.9719
cg23687319	0.0360562	2.40514e-30	4.15777e+29	0.969247
cg23767977	0.221063	4.7099	0.212319	0.974202
cg23779331	0.0325374	25785.7	3.87812e-05	0.967966
cg23788167	0.140634	3.4819e-20	2.87199e+19	0.975317
cg23829949	0.00279966	14.2659	0.0700971	0.965957
cg23845773	0.0700473	7.59602e-52	1.31648e+51	0.973748
cg23886755	0.0170044	1.35115e+16	7.40109e-17	0.973844
cg23894539	0.369435	6.97564	0.143356	0.971481
cg23934633	0.0543058	7.71423e+06	1.29631e-07	0.970716
cg23964386	0.0308881	7.86035	0.127221	0.977062
cg23973566	0.154987	4.21505	0.237245	0.973838
cg23993660	0.0602016	2.28978e-14	43672288153377	0.96894
cg24019851	0.726747	0.611393	1.63561	0.971178
cg24082826	0.132022	6.78467e+12	1.47391e-13	0.973383
cg24088639	0.00153407	3.97894e-30	2.51323e+29	0.968631
cg24104611	0.115016	61.1849	0.0163439	0.968612
cg24124398	0.258253	9.98169e+09	1.00183e-10	0.972666
cg24127989	0.030919	738.667	0.00135379	0.96747
cg24165760	0.111434	226.967	0.00440593	0.968809
cg24206256	0.00011805	208.069	0.00480609	0.976228
cg24333473	0.00229327	26.2947	0.0380304	0.971282
cg24336531	0.0803067	4.66427e-14	2.14396e+13	0.971054
cg24355174	0.0358832	7.67373e+13	1.30315e-14	0.970667
cg24382521	0.014414	1556.47	0.000642479	0.974978
cg24448259	0.00478794	26.2712	0.0380645	0.971579
cg24474998	0.00470754	1.69664e+06	5.89399e-07	0.971154
cg24496666	0.0323445	88.7408	0.0112688	0.96893
cg24505527	0.258706	1.79377e+07	5.57485e-08	0.971406
cg24516061	0.777612	1.64914	0.606376	0.971524
cg24523000	0.0190616	6.39146	0.156459	0.974928
cg24573501	0.997025	0.994598	1.00543	0.971105
cg24577137	0.165925	1.33785e-08	7.47469e+07	0.971833
cg24643262	0.0870912	11.8224	0.0845849	0.972716
cg24649641	0.429476	2.2525e-06	443950	0.97082
cg24651706	0.0107495	9.1598	0.109173	0.975063
cg24674703	0.0362628	9.64515	0.103679	0.972758
cg24686224	0.029426	1.85125e-22	5.40174e+21	0.972681
cg24737900	0.0777893	4.17936e-15	239270936535812	0.97038
cg24777950	0.18525	12.0867	0.0827357	0.973521
cg24812523	0.157772	0.0087391	114.428	0.970067
cg24883276	0.116004	1.44282e-16	6930885225132410	0.971163
cg24926042	0.351134	3.32892	0.300398	0.972467
cg24938727	0.00759281	80.7589	0.0123825	0.976959
cg24946133	0.362009	0.00103113	969.811	0.970385
cg25058957	0.0874452	5.38627	0.185657	0.972106
cg25059792	0.00205806	5.65736e+13	1.76761e-14	0.970549
cg25092328	0.0312162	57.0982	0.0175137	0.968918
cg25093045	0.070339	6.04133	0.165527	0.973426
cg25215340	0.0761898	1.64684e-19	6.07222e+18	0.971211
cg25355065	0.018938	5.79512e-39	1.72559e+38	0.966604
cg25366404	0.0540747	17.695	0.056513	0.972839
cg25392935	0.0865553	5.78284e+16	1.72925e-17	0.97126
cg25416363	0.0147526	1.96981e-24	5.07664e+23	0.968171
cg25420952	0.0198708	10.5502	0.0947848	0.975274
cg25423576	0.0215489	9.25472	0.108053	0.971867
cg25432323	0.0140936	7.11596e+12	1.40529e-13	0.966134
cg25443975	0.268462	4.45877	0.224277	0.973926
cg25470175	0.0318998	5.83109e+28	1.71495e-29	0.966176
cg25483839	0.000344184	109.631	0.0091215	0.973634
cg25494064	0.0179104	1.99658e+07	5.00857e-08	0.975277
cg25543604	0.342302	6.9788	0.143291	0.971774
cg25565479	0.420834	120.657	0.00828796	0.969847
cg25590938	0.414585	3.98346e-05	25103.8	0.971406
cg25622628	0.512225	839.399	0.00119133	0.971453
cg25653103	0.00285817	9.40679e-24	1.06306e+23	0.972333
cg25705900	0.0770203	19.043	0.0525128	0.972624
cg25799433	0.00648979	60.7888	0.0164504	0.972858
cg25820693	0.165453	6.23344e-09	1.60425e+08	0.969428
cg25836159	0.0115263	2.75193e-15	363381430233901	0.967946
cg25887739	0.071453	5.49627e+09	1.81942e-10	0.969295
cg25898500	0.00798377	1.42771e-20	7.00422e+19	0.971716
cg25905459	0.129088	1.77329e-13	5.63922e+12	0.972199
cg25927124	0.0494576	1.39901e-27	7.14793e+26	0.975756
cg25943702	0.0886641	653337	1.5306e-06	0.976511
cg25974870	0.636467	0.00296276	337.523	0.971608
cg26024206	0.044175	5.70804e-19	1.75192e+18	0.970378
cg26039806	0.309065	6.10732e+07	1.63738e-08	0.971006
cg26081812	0.0529841	0.0809017	12.3607	0.969001
cg26116551	0.0914499	3.46331	0.288741	0.975888
cg26136776	0.0324505	21.0606	0.0474819	0.974797
cg26145103	0.00452174	98.3213	0.0101707	0.970949
cg26149678	0.52196	2.08061	0.480628	0.972426
cg26185508	0.0439128	6.40856	0.156041	0.977032
cg26198807	0.144302	4.05619	0.246537	0.973243
cg26199493	0.112029	705.081	0.00141828	0.967422
cg26260350	0.112646	5.40083e-10	1.85157e+09	0.968309
cg26261431	0.0481059	5.93454e+07	1.68505e-08	0.969182
cg26301908	0.0243003	1.9463e+09	5.13795e-10	0.967296
cg26331247	0.183899	4.11756	0.242862	0.971886
cg26357241	0.0194089	8260076739000080	1.21064e-16	0.969732
cg26411702	0.00225736	535.835	0.00186625	0.971513
cg26507094	0.14536	1.32086e-15	757081511454025	0.970655
cg26512148	0.0285131	1.10377e+17	9.0599e-18	0.96767
cg26516941	0.074443	3.22898e-11	3.09696e+10	0.971171
cg26527984	0.383373	4.44976	0.224731	0.971918
cg26538349	0.0019622	6.86325e+19	1.45704e-20	0.973195
cg26568722	0.223346	139215732700339	7.1831e-15	0.972766
cg26571739	0.459893	6.2881	0.15903	0.970735
cg26581729	0.0114409	0.0798492	12.5236	0.969414
cg26609631	0.0171602	30.059	0.0332679	0.978337
cg26616347	0.00273098	363.48	0.00275118	0.971224
cg26635603	0.0164491	2.42772e-13	4.1191e+12	0.968522
cg26697117	0.752053	1.58648	0.630328	0.971708
cg26701198	0.0751428	2.93744e+10	3.40433e-11	0.970936
cg26702875	0.0207021	283687	3.52501e-06	0.967614
cg26755793	0.120642	3.80212	0.263011	0.971341
cg26757722	0.00103495	0.0919164	10.8795	0.969184
cg26783856	0.0726543	8927.58	0.000112012	0.969554
cg26788215	0.0239513	1.01112e-16	9890037437803490	0.97091
cg26791905	0.00571851	22.9796	0.0435168	0.969537
cg26824091	0.0340577	8.14323e+06	1.22801e-07	0.965965
cg26839325	0.271941	2.38874	0.418631	0.972836
cg26853640	0.00285928	24.8016	0.04032	0.980749
cg26872564	0.0257301	11.5171	0.0868271	0.976843
cg26909431	0.246688	2.21643e-06	451177	0.972651
cg26952662	0.0226762	33.9192	0.0294818	0.970844
cg26982998	0.246335	3.75895e-17	2.66031e+16	0.972705
cg26989531	0.0137237	472185	2.11781e-06	0.972426
cg27005181	0.113951	3.46999e-09	2.88186e+08	0.969949
cg27056559	0.882832	0.411755	2.42863	0.971354
cg27061947	0.00505828	6.07258e+22	1.64675e-23	0.967679
cg27088844	0.192506	1.68093e-12	5.94907e+11	0.97186
cg27114026	0.392364	0.0610133	16.3899	0.969211
cg27124774	0.117513	4.22561	0.236652	0.975725
cg27141427	0.0112576	1.34018e+13	7.46166e-14	0.969284
cg27194921	0.0126999	48.6183	0.0205684	0.970072
cg27236973	0.0236527	168.181	0.00594597	0.963743
cg27286107	0.248047	3.39084e-17	2.94912e+16	0.972591
cg27352063	0.191132	1.08156e+06	9.24592e-07	0.974029
cg27368011	0.0398784	1.06249e-27	9.41184e+26	0.969646
cg27440002	0.0291968	396.147	0.00252432	0.97524
cg27497900	0.171019	12278.2	8.14449e-05	0.971912
cg27519373	0.067893	8.06114	0.124052	0.972825
cg27561006	0.119863	45149.3	2.21488e-05	0.973665
cg27626299	0.000917238	11.2819	0.0886375	0.973381
cg27637521	0.000236366	0.0441876	22.6308	0.964552
cg27662379	0.00465805	1.54259e-25	6.48261e+24	0.970199
