# Supplementary material for: Molecular subtypes based on DNA methylation predict prognosis in colon adenocarcinoma patients
Source: Aging (Albany NY). 2019 Dec 18;11(24):11880–92. doi: 10.18632/aging.102492 (PMC6949097; doi:10.18632/aging.102492)
Supplement: Supplementary Table 9 [file aging-11-102492-s010..xlsx]

## Sheet: S12_Table
Supplementary Table 9. The available expression profile of 376 sites in 266 training set samples.
row.names(test.rna.exp)	TCGA-A6-5666-01	TCGA-A6-5664-01	TCGA-NH-A6GB-01	TCGA-CM-6677-01	TCGA-D5-5539-01	TCGA-CK-5913-01	TCGA-CM-5349-01	TCGA-CM-6172-01	TCGA-D5-6920-01	TCGA-AZ-6606-01	TCGA-CM-6163-01	TCGA-AZ-4323-01	TCGA-AZ-6598-01	TCGA-A6-5662-01	TCGA-DM-A0X9-01	TCGA-AA-3510-01	TCGA-AZ-4308-01	TCGA-CK-5914-01	TCGA-AA-3506-01	TCGA-CA-5255-01	TCGA-AD-6964-01	TCGA-CM-5864-01	TCGA-G4-6320-01	TCGA-AD-6890-01	TCGA-G4-6317-01	TCGA-D5-7000-01	TCGA-CM-4744-01	TCGA-F4-6704-01	TCGA-DM-A1DB-01	TCGA-NH-A6GC-01	TCGA-CK-4952-01	TCGA-G4-6297-01	TCGA-G4-6302-01	TCGA-CM-4750-01	TCGA-CK-5916-01	TCGA-CM-6168-01	TCGA-AZ-6603-01	TCGA-D5-6922-01	TCGA-AD-6548-01	TCGA-CM-5341-01	TCGA-CK-5915-01	TCGA-AA-3489-01	TCGA-A6-2680-01	TCGA-CM-4746-01	TCGA-G4-6321-01	TCGA-A6-6650-01	TCGA-G4-6303-01	TCGA-F4-6854-01	TCGA-A6-2675-01
ENSG00000117000.8	2.997	4.55141	3.89586	3.51666	3.32772	4.66893	3.27317	2.85795	4.06714	2.93102	3.24587	4.48334	3.04532	2.22619	2.89733	3.10629	0.801337	3.96457	1.56958	2.80071	3.11004	2.77439	3.31176	3.29014	2.25784	5.55347	2.69871	2.66772	5.12956	3.00298	3.96505	4.77833	3.53373	1.68989	5.33676	4.54579	3.78827	7.14371	3.66884	2.52314	4.56573	5.30563	1.96324	1.56005	2.04789	3.91933	2.95233	3.85443	4.04726
ENSG00000072858.9	0.126414	2.76312	0.423664	0.820792	1.73844	4.07248	0.707568	1.25406	2.63071	1.91234	1.98516	1.86412	3.04197	0.741197	1.1548	2.50347	0.729508	0.843563	0.393516	2.012	1.82508	1.06561	3.56162	0.843925	0.263467	2.97309	0.757242	6.31076	0.562098	7.0127	7.3536	1.51534	0.980792	0.45596	0.401244	1.62625	1.16641	2.49614	1.04809	0.46654	0.963361	1.23885	1.08024	1.65523	4.00086	1.7701	3.63181	0.611835	3.45423
ENSG00000114302.14	14.123	11.8467	12.741	12.4833	11.87	13.0523	15.19	20.2658	20.7482	11.0721	14.7256	15.4892	12.1003	13.4906	15.4481	12.3571	8.27936	22.5427	12.0503	11.5707	7.04696	18.3165	9.42282	15.2093	14.7065	15.3806	6.46407	10.1655	17.7314	10.9395	13.4653	16.3339	11.2069	5.30624	17.6191	17.9498	24.1927	16.5607	18.9425	7.86	37.3445	14.8273	19.5198	7.21648	10.6485	26.088	18.6529	22.3546	19.3507
ENSG00000159184.7	2.27589	4.98479	1.11735	2.41575	4.70082	1.98532	3.24581	8.7061	14.4346	3.77577	21.1167	6.05601	12.4019	2.65972	2.88277	0.164939	3.53205	0.0167139	3.1049	3.05466	6.64688	3.11408	3.08221	10.2337	4.07549	3.30041	0.649788	20.1341	1.37617	3.74542	4.06377	1.23071	1.76413	8.51701	4.31146	0.756133	1.7062	61.6707	2.32081	6.88539	5.78224	1.72176	2.56392	3.74298	3.65242	1.43602	5.85509	4.16836	18.3604
ENSG00000159625.13	0	0.0486251	0	0	0.0123273	0.00744438	0.00494269	0	0.0108231	0.0038216	0.00378813	0.84608	0	0.0161642	0.0108854	0	0	0	0.130614	0.00917861	0.00644645	0.00587116	0.0106661	0.0391682	0.0105707	0	0	0.00709391	0.0329827	0.0490182	0.0116227	0.00438283	0.018773	0	0.00494366	0.00782974	0.0102535	0.0108596	0.00371039	0.00820243	0	0.0210704	0.00884977	0.0530379	0	0	0.00331169	0	0.0101502
ENSG00000164008.12	4.27753	2.78628	2.9445	2.47708	2.63443	3.02396	3.94294	3.10573	4.03447	2.6652	2.69748	2.95115	4.14411	2.88747	2.66368	4.79286	4.24762	3.25751	5.47915	3.75088	4.06986	3.85033	3.70623	4.55952	4.31977	2.7404	3.96968	3.19406	3.65212	3.92405	2.8062	2.88501	3.19269	4.18194	2.52833	3.18049	3.12797	4.24294	3.54098	8.71107	3.04037	3.51467	3.78974	4.71554	2.84952	2.28103	2.17992	3.19681	2.95571
ENSG00000177352.9	12.5195	10.7584	12.9539	8.69164	8.60422	13.9949	8.53425	6.16994	11.8011	7.95804	5.89434	19.6303	7.36151	15.7899	7.41414	15.6183	26.1385	12.5048	22.234	6.79586	23.697	9.18647	12.2005	16.9599	14.522	10.0354	17.7357	12.5017	11.9241	12.7593	13.8158	8.94927	11.497	13.6525	10.0372	11.0961	15.7963	14.1545	14.251	18.2193	11.9827	9.78083	11.4923	16.5668	9.67192	7.40295	13.0836	8.75853	12.0948
ENSG00000131069.18	18.0982	9.35669	26.3612	36.4622	16.6458	25.0584	22.5143	28.534	38.9369	18.72	31.2855	11.8401	19.861	34.3446	29.5372	31.8955	41.7085	44.661	28.0933	44.2237	22.5009	22.7225	23.721	18.4601	33.2917	30.054	15.0695	26.2446	37.373	35.0322	17.5029	31.5435	16.4308	31.3772	13.6332	22.0379	36.2372	30.9726	27.1085	13.5971	26.0942	22.822	54.2958	29.197	50.0579	71.5628	33.3155	29.7846	41.0746
ENSG00000151092.15	5.22798	2.7676	4.01168	4.74393	1.83543	3.41503	4.07002	5.29313	5.0844	3.45423	4.63327	4.3003	3.23617	5.14012	4.79993	4.36129	2.14195	4.7048	2.28567	3.76767	4.56249	5.12151	3.53361	5.96798	4.89826	4.60679	3.13945	5.35866	5.64035	4.89113	3.07037	4.66921	2.75256	2.44306	4.73756	4.47341	5.3243	6.40267	4.13188	4.50113	5.62093	4.71886	3.61352	3.1883	2.56766	6.46656	3.9112	5.09203	4.45536
ENSG00000152595.15	0	0	0	0.0263133	0.00854497	0	0.020557	0.00935924	0.0150047	0	0	0	0	0.00840351	0	0	0	0	0	0	0.0134056	0	0	0	0.0329732	0.00763556	0	0	0	0.0582486	0	0	0.0195195	0	0.0102805	0	0	0.0225828	0	0	0	0	0	0	0	0	0	0	0
ENSG00000063854.11	5.2427	4.25481	6.02239	5.56878	4.41384	4.18437	6.50237	3.91877	5.28107	5.97636	5.20556	5.30325	5.15311	9.96705	4.19003	8.7366	13.777	3.57542	10.1663	7.38265	7.13019	5.0058	5.99063	5.76444	6.84837	4.56451	7.56219	4.73552	3.29362	6.38703	3.92779	4.78346	5.03728	8.43216	4.44515	4.33685	5.80754	5.13659	4.51016	6.51969	3.98916	3.9054	11.8483	7.33101	5.6458	7.99659	4.84775	5.15549	5.15837
ENSG00000137628.15	3.26117	2.67166	2.6102	1.95534	3.49316	7.48173	6.56297	5.11396	8.38037	12.6247	4.33326	3.5065	1.46823	2.92342	3.08595	3.23137	1.37502	6.91072	1.99346	7.18641	8.54985	2.70613	2.20171	5.58083	1.2463	8.26581	5.24769	4.97134	3.07697	2.48485	4.29576	12.3315	8.31616	6.07125	6.81324	6.34541	4.50957	7.55228	11.3881	6.25936	3.02221	3.45968	3.36992	2.51612	23.5258	1.18946	2.43873	3.93953	13.1019
ENSG00000095319.13	8.34829	11.5329	12.8613	15.9034	7.79408	16.0113	9.51141	12.3626	14.0698	9.63323	11.9707	12.9659	16.8891	7.5848	10.5433	9.12825	10.4971	15.3545	11.3672	8.62853	12.8222	10.5459	9.96193	12.3734	11.3863	12.4779	8.10097	13.3527	11.2773	13.5247	18.6334	7.23521	10.727	8.94411	21.5759	12.9153	9.4146	16.2041	12.2241	2.08075	12.5621	10.8363	15.539	8.53922	3.89874	10.888	11.1397	13.5539	8.54057
ENSG00000165959.10	2.92625	3.86313	0.52635	3.91044	4.4796	4.39974	2.82472	7.98207	6.28714	1.39041	4.21546	2.46594	3.06398	0.715901	2.93905	3.35332	1.18846	4.17783	2.48532	2.47823	2.04086	3.60959	4.87089	4.7471	4.84468	4.73886	1.29439	5.30854	3.96304	10.9835	5.70559	2.09929	1.96774	2.70262	2.12139	3.37269	3.05662	9.82113	4.10461	1.67377	9.72734	3.97471	1.99459	1.71101	6.17939	4.50824	4.3002	2.4145	4.71856
ENSG00000171456.15	7.276	7.65878	16.6878	10.7068	5.80976	5.37226	7.93633	9.48745	8.25181	6.28199	10.2826	17.2933	7.40903	13.1423	9.78594	5.95365	10.28	18.8315	7.37066	4.29082	7.92033	7.40544	5.96249	7.53938	10.7442	9.05053	5.3489	6.3697	14.071	7.96647	6.74425	12.7303	6.77633	10.8166	6.77157	9.25727	18.6463	19.0127	9.25489	4.02664	13.6612	11.7385	10.0872	6.01071	2.95812	15.0118	16.7626	18.139	12.9299
ENSG00000257008.5	0	0.0649015	0.0356906	0	0.0263257	0.0953881	0.0474996	0	0.0577838	0.012242	0.0242695	0.913415	0.0160502	0	0.0174348	0.0508035	0.03022	0.0120122	0.059772	0	0.0619509	0	0.0170836	0	0.0169309	0.023524	0	0.0227243	0	0.0224319	0.0372318	0.0140398	0.0451024	0	0.0158363	0.0627036	0.0109486	0.0231914	0.0475428	0	0.0146327	0.123743	0.0566979	0.0566331	0.0159412	0.0244759	0	0.0212971	0.0487722
ENSG00000173302.5	0	0	0	0	0	0.0151326	0	0	0	0	0	0.247053	0.02037	0	0	0	0	0	0	0	0	0	0	0	0	0	0	0.0288404	0.0223486	0	0	0	0	0	0	0	0	0	0	0	0	0	0	0	0	0	0	0	0
ENSG00000134825.12	35.7437	26.3013	27.4138	32.6847	24.505	25.7848	16.3812	13.0573	21.412	22.3286	16.3517	24.5805	24.1263	33.8286	28.7434	38.7025	53.9314	24.5161	38.5017	29.611	18.8432	23.7562	24.0143	19.3244	29.3812	23.1361	49.8382	29.4224	30.3415	16.6244	28.5033	20.0299	17.5481	55.9651	22.4601	19.2256	27.481	22.7057	27.7962	76.211	18.437	24.3977	44.6045	67.513	16.4679	25.2268	21.4899	23.9207	19.1974
ENSG00000118096.6	5.33671	4.25217	2.93422	4.87896	4.75595	2.3275	2.22289	2.87506	3.38631	1.57935	3.03383	5.51766	2.4699	6.9476	2.99905	2.72021	4.30641	3.91479	4.13283	3.45234	5.30211	3.7902	3.07548	4.51149	3.51197	1.5323	3.07483	4.01431	4.77744	2.76155	1.93074	3.77648	4.75384	10.532	2.54381	2.07788	6.28695	4.82525	4.78557	18.3781	6.23707	5.51111	1.88842	3.33081	0.934203	2.25989	4.1953	3.55118	5.61358
ENSG00000138442.8	9.63384	4.52409	5.20412	7.65116	3.75952	5.70259	5.58	6.25819	5.41281	5.03054	6.28832	5.84621	5.81534	5.50245	5.89485	4.8577	2.92694	10.3945	3.53902	4.4821	4.98925	9.15115	3.65045	5.12894	6.4606	4.15352	6.11841	4.67503	6.81749	3.31842	6.74055	3.04222	3.20188	7.17696	7.19048	6.42334	5.10086	5.15027	7.09408	10.1749	8.39743	5.28473	5.13572	5.43514	1.12981	5.22354	4.85805	4.73524	4.4451
ENSG00000167553.13	40.6621	42.7046	53.2637	36.2625	35.9514	42.3661	23.6786	29.4804	42.9731	48.624	31.5759	28.8876	43.3917	45.2808	59.2699	23.0382	42.1509	48.6625	62.3668	38.106	27.4121	28.2897	25.8629	47.5432	31.9926	65.3205	69.2607	26.8828	55.9191	19.8539	80.2257	38.9023	23.9139	43.1297	41.3947	38.2408	43.981	43.3474	64.691	28.2918	51.1031	28.1939	35.3873	37.7361	54.3224	72.1619	30.2456	50.5293	41.4341
ENSG00000089053.11	14.0199	13.2047	11.1035	13.9081	8.14536	9.01773	9.96334	11.8797	9.24331	7.5211	10.0053	12.7612	12.2667	6.96331	17.3363	12.522	15.308	12.3094	22.1067	10.6728	11.6074	12.0094	10.4979	11.8414	10.3266	16.6321	12.0376	10.2518	20.8455	10.3515	17.1843	9.19993	7.66861	14.2814	7.50035	10.2007	11.5385	12.372	11.2648	14.8001	11.1795	10.0412	12.4337	11.9051	5.34586	13.2699	11.4366	13.5686	10.2069
ENSG00000213024.9	11.7413	15.6889	17.0837	14.3349	14.1973	17.4086	18.1137	12.5773	13.6041	22.0918	16.4529	25.0661	21.2172	11.7805	31.365	14.1943	13.9566	17.6889	24.0443	12.7386	19.4325	10.7004	22.2319	20.6064	11.6226	12.6832	14.2125	15.3103	17.8854	13.1639	22.101	19.1371	12.3485	14.63	17.9353	13.8378	17.2573	18.4384	16.1374	3.93732	18.546	17.3768	14.9931	17.3888	7.02153	11.817	9.65987	15.0636	15.7242
ENSG00000139880.18	0.461514	4.32148	1.937	3.44324	2.29843	1.91832	2.38431	2.03499	2.56834	3.01474	2.6239	5.13943	4.28998	1.84385	4.76105	2.33219	3.00793	1.62338	4.12867	1.94263	2.21489	1.86392	11.5584	8.18987	1.32928	2.87131	1.27035	3.13606	3.10506	5.39902	3.14145	2.54793	2.15432	3.79671	5.93136	2.98608	1.5407	7.8255	1.33602	0.597462	5.00344	2.67377	2.96766	3.36517	0.683924	2.26293	2.0117	1.77259	2.81088
ENSG00000100485.10	5.63863	6.00177	2.28718	6.43984	7.6146	4.31655	6.27505	11.6683	7.27743	5.9129	6.71328	5.16061	4.87308	6.09644	4.72372	3.95037	0.553315	5.37042	2.29963	2.13635	5.76242	8.3866	4.91364	3.51865	5.0463	6.04091	2.49402	5.344	6.46061	8.69787	3.16688	5.19007	5.63082	2.27277	5.2706	6.06302	5.20191	7.78301	4.12656	4.6343	10.3233	4.87812	2.39161	2.19199	6.73904	6.35626	9.99218	4.50901	8.94506
ENSG00000145246.12	1.96642	2.49472	1.91662	1.30111	2.53512	2.83563	0.97492	4.51432	1.25288	1.77944	1.51643	2.95347	1.76271	1.78755	1.62791	1.07692	0.40876	2.48085	1.21876	1.08329	3.46857	1.99717	1.37266	1.00959	0.967313	1.978	0.57972	3.02174	0.257739	1.84315	1.14751	2.22217	3.23849	0.794034	4.54945	3.52421	2.31864	2.94261	1.26455	1.77172	0.407665	2.9342	0.578041	1.07473	1.04915	0.768367	3.03048	3.15371	1.70997
ENSG00000103811.14	35.3699	31.3793	25.9143	16.3886	20.7923	20.8619	32.2223	8.27453	10.8024	24.2622	16.201	18.1853	10.4032	25.5742	23.7981	16.936	28.4288	19.2042	33.0492	38.0752	22.9937	62.6661	18.654	14.0002	34.9137	14.0469	27.5239	12.9513	30.6705	5.81584	5.03986	22.4955	22.5091	94.1909	23.9132	17.6362	24.1042	13.8388	37.5789	48.2742	32.5985	27.1733	17.3227	19.544	14.7571	12.0002	15.5733	27.8029	41.9859
ENSG00000101160.12	88.2584	132.383	190.672	111.903	100.211	95.4699	137.181	84.2454	115.694	106.752	120.666	104.76	65.6109	176.727	88.9685	209	270.246	106.416	180.012	120.262	263.935	126.875	49.6706	98.035	171.097	119.159	101.258	128.448	109.873	109.238	46.1108	230.612	124.777	292.064	176.966	174.84	137.931	119.625	169.581	136.807	83.1494	195.863	206.99	111.263	166.693	159.852	160.499	125.456	158.108
ENSG00000205231.1	0	0	0.0243731	0	0.00599261	0.00542837	0.00720833	0.019691	0.0105228	0.00557335	0.0276227	0.0681716	0	0.0235736	0.00793749	0.0115646	0.110065	0.0164063	0	0	0.122218	0	0.038888	0.0244809	0	0.0428387	0.00452361	0.00344854	0.0280591	0.0102125	0.0847518	0.0191755	0	0.0120988	0	0.0228375	0.0199381	0.042233	0.0162335	0.0119623	0	0.0307287	0.0129063	0.0257832	0	0.117002	0	0.00969586	0.0592115
ENSG00000100263.12	5.03151	6.17721	8.21631	5.69822	4.63487	5.49618	5.64272	4.43043	6.91786	6.60959	5.48996	4.94506	8.6914	3.77082	7.72038	6.58632	13.7043	6.5881	6.53724	5.57654	13.8155	4.12395	6.48026	11.877	10.6136	6.68303	6.55211	10.0263	11.3441	7.51567	7.66732	5.84249	4.93283	10.7612	4.00475	5.23205	6.86922	9.95396	9.16296	2.2429	4.42639	7.89216	4.53734	6.70759	4.62661	3.28412	9.61592	6.78893	6.02807
ENSG00000125611.14	7.82908	4.2311	2.10691	5.3058	3.86831	4.39158	1.60521	3.9409	3.05519	3.82809	3.75823	5.09236	5.03267	5.22187	4.30709	8.85595	21.5756	4.9895	12.9123	5.92403	5.11468	7.28905	4.984	5.22158	6.09102	3.54718	8.6879	1.64607	3.95471	3.65598	3.38709	2.27021	3.68508	13.8919	3.99009	2.9988	4.21984	3.9137	4.59629	14.3196	3.38637	2.91136	9.77431	13.7847	3.59373	3.27191	2.15557	3.82179	3.05302
ENSG00000198546.13	12.9421	7.60524	5.91155	10.8232	15.2382	13.452	20.9334	4.28305	9.91835	11.2713	6.83802	6.05486	15.5155	12.3458	12.6457	18.3268	21.0014	12.0652	19.6948	16.9411	7.9606	12.7377	16.5749	17.0735	11.4967	10.3025	18.9995	15.8906	7.96119	6.41281	17.6885	7.50602	6.3716	10.5109	11.7616	9.49138	6.36966	6.18568	12.989	7.89877	10.1	9.7805	12.4824	20.2796	4.04047	12.0034	8.42294	12.6225	8.84493
ENSG00000182993.3	0.368132	0.155286	0.200929	0.156884	0.213048	0.243334	0.317551	0.202913	0.121991	0.176606	0.16225	0.300319	0.338846	0.273289	0.190173	0.107254	0.138231	0.380396	0.0630941	0.227602	0.406897	0.178675	0.138254	0.271193	0.232335	0.128296	0.342623	0.173242	0.328388	0.205215	0.213973	0.118561	0.153407	0.280523	0.256319	0.225042	0.234994	0.155042	0.276019	0.776599	0.1905	0.253324	0.0598492	0.109598	0.0448726	0.107651	0.216497	0.108657	0.257415
ENSG00000254521.5	0	1.08107	2.19028	0.207291	0.90395	2.57847	0.960093	0.958491	1.25802	0.939089	2.87238	2.25357	0.25797	0.0189146	0.554081	4.11986	1.23637	0.0702069	1.00437	0.397393	0.165953	0.0549611	0.124809	0.471421	0.0989547	1.68424	0.718656	0.807958	0.945572	0.0983292	0.444278	0.184629	0.999507	0.213568	4.24606	1.46591	0.183972	0.643838	1.78879	0.153569	0.0534515	1.43824	0.911289	0	1.70036	0.974542	1.22455	0.482335	1.21148
ENSG00000128245.13	104.421	72.6149	47.9969	67.2772	77.01	126.09	70.8993	62.4509	67.8028	74.11	85.7508	50.4926	83.6548	45.7975	57.0705	66.8556	62.7181	90.3262	80.7932	86.4727	98.4935	49.0806	79.3318	80.8972	54.6607	70.1711	79.3659	90.7634	90.407	52.0543	80.793	64.7276	87.8495	87.208	103.946	95.747	68.1246	67.3472	85.6427	74.3736	74.9429	71.5963	70.5241	74.4529	100.214	47.0986	56.4259	67.3607	73.3955
ENSG00000120696.8	3.17839	1.25657	2.13971	2.49202	4.35479	2.59204	4.01742	4.59837	1.97452	4.61564	4.72772	4.47588	0.169005	5.96676	2.76266	1.72565	0.636419	3.9986	1.23847	2.05235	2.85482	3.63496	3.02906	1.36379	2.60517	2.94446	1.53226	3.14927	3.20899	2.02677	2.68528	5.05027	2.18565	1.56164	0.398055	2.82845	3.67428	3.71421	1.58663	1.59757	0.85489	3.2823	2.87916	1.38504	1.27788	2.56894	3.77636	2.93339	2.22543
ENSG00000112280.14	0.0268539	0.266115	0.268294	1.43117	1.17239	0.19556	1.3417	1.29067	0.229033	0.214726	0.389756	1.05741	0.0365615	0.551423	0.923387	0.0810092	2.42314	0.298259	1.06203	0.7267	0.0611523	0.629781	0.412505	1.38823	0.701931	0.270611	0.0339511	1.72377	0.244689	0.822686	0.155488	1.12256	0.099316	1.42867	0.0180371	0.482783	3.87821	2.14749	0.0974699	0.287298	0.663315	0.0512507	0.703893	0.18061	0.0363132	1.03146	0.282737	0.422069	0.536984
ENSG00000138175.8	4.64782	6.29319	4.1505	4.70524	5.64938	4.35932	5.10653	5.01169	4.73284	4.32212	5.8071	7.37881	4.5454	5.48004	5.53557	6.91747	5.7645	6.61778	5.17572	4.09571	5.6149	7.03346	4.78804	6.16333	6.02007	5.49587	5.24129	6.99318	4.67386	4.76685	5.25382	5.22114	6.38961	6.08089	6.12108	4.77907	6.00889	3.34695	5.94647	14.1459	5.73543	5.42574	6.60534	9.85523	1.72712	3.39921	3.65222	7.44338	3.54316
ENSG00000177595.16	1.73203	3.08693	4.063	4.05906	1.46059	2.54486	5.44421	2.92304	4.22391	2.60276	1.79866	5.35391	3.131	2.41884	3.45126	3.42413	6.46646	2.14582	5.40423	5.44164	3.5135	2.01993	5.52779	6.09445	4.79648	2.57161	2.99457	2.44892	4.54238	3.57078	2.85283	3.08117	1.65587	4.49246	2.79423	3.48404	2.87072	4.29532	2.23394	0.532723	4.51424	3.39033	4.85444	1.78439	1.59418	3.58433	2.80191	4.38794	2.50773
ENSG00000170835.13	6.61982	2.3278	0.856254	18.8411	0.134211	0.0286058	10.389	1.3403	15.0968	1.95309	0.31296	1.26633	0.0288796	8.54825	11.8321	0.0609415	6.97821	1.22479	17.9608	0.211618	0.0619278	40.293	20.6157	26.3711	137.384	0.1552	0.339691	0.0863203	5.93563	0.430531	0.141428	7.46077	0.117222	36.9789	0.0474912	0.188041	4.76085	3.69997	3.08676	10.8424	51.1836	7.56349	19.6895	1.40964	0.057367	31.5107	9.2196	34.2713	20.8082
ENSG00000166823.5	0.790175	0.185023	0.847896	0.206347	0.187625	0.598904	0.0429883	0.117431	0.619704	0.216046	0.708354	0.843601	0.0217887	0.694143	1.27218	2.62077	4.98449	1.07626	2.02856	0.778338	0.546653	0.625527	2.38874	1.54513	0.827435	1.57278	2.00982	0.10283	0.454198	0.106582	0.134782	1.53429	0.387778	5.50171	1.13941	0.170245	0.594523	0.834303	0.16942	0.214018	0.476745	0.259613	2.46302	0.0576611	2.34802	0.764217	0.208821	0.0795068	0.11035
ENSG00000064692.17	0.0452878	10.3407	0.278138	0.689598	0.228274	0.149196	0.96278	1.67106	0.938678	0.803528	0.351628	1.05846	0.221973	0.127877	0.997021	0.172864	0.0995093	0.271606	0.40676	0.122635	0.475986	0.656455	1.37259	3.98986	0.137518	0.284022	0.10688	0.708367	0.197147	0.251139	0.0653856	0.523948	1.09571	0.128345	0.114722	0.97455	0.502322	0.682198	0.98366	4.5798	4.23689	0.874196	0.373394	0.547018	0.0804873	0.163876	1.52537	0.502583	1.28122
ENSG00000130222.9	3.6923	4.89442	3.27759	4.19073	2.36956	6.56987	4.67983	6.92679	11.9203	10.2893	2.73059	7.34003	20.1277	10.9903	3.4885	44.9553	15.8793	2.49847	22.3925	4.63134	9.69546	27.2684	4.52993	7.26005	4.42765	5.47942	1.30526	24.1117	1.7028	16.7255	8.12137	1.55402	5.19339	2.58596	2.08033	2.10502	3.86198	4.06204	3.02152	6.83937	4.1826	11.0148	6.44813	18.7712	1.95838	2.24771	3.17427	12.6285	3.9549
ENSG00000143127.11	0.044991	0.244391	0.0681057	0.134069	0.154056	0.112247	0.173223	0.282449	0.120556	0.0872124	0.126585	0.441942	0.0735059	0.105395	0.093155	0.0581668	0.123022	0.0458442	0.0912469	0.0635873	0.246941	0.0717777	0.134744	0.0912094	0.00861547	0.33218	0.0227526	0.179235	0.288981	0.313904	0.148409	0.300061	0.849181	0.0473308	0.10476	0.526472	0.164353	0.253726	0.108867	0.120334	0.040953	0.46081	0.10098	0.0072046	0.0648949	0.0467055	0.126859	0.135466	0.153046
ENSG00000161021.10	3.67287	6.16993	5.51356	6.52391	7.23086	5.95457	5.28011	7.13051	6.7397	7.7746	8.46584	6.49819	7.33702	5.86105	5.36577	4.3024	2.72288	5.3213	3.90208	3.21533	6.52931	3.73998	5.82816	4.97445	4.6453	6.06322	3.191	5.51586	3.36928	7.64599	7.52699	7.16349	5.65136	3.35788	7.3369	6.76836	7.02071	9.06654	5.62461	1.52166	7.0368	7.36757	5.40284	2.78991	3.96372	7.44804	9.61276	6.74504	6.49023
ENSG00000160883.9	0.352908	1.99841	0.94197	1.39667	2.57979	1.2005	8.14869	0.930132	1.22006	0.161549	1.27514	0.914826	2.322	0.480844	0.421807	2.8555	2.14167	0.704523	2.42475	0.186817	6.29798	0.238997	0.192043	0.884815	0.0827505	2.36272	0.558481	1.8474	0.447543	0.581074	0.885595	1.98312	2.10152	0.376673	2.53874	3.27919	1.48762	1.9496	4.86229	1.91348	0.135884	6.19093	1.33014	0.318316	0.179201	0.334955	1.07329	1.23868	3.47234
ENSG00000110435.10	12.8433	8.2379	10.1578	13.1483	8.28059	10.7287	9.76411	14.4523	8.88143	9.61742	7.44699	6.44861	11.511	11.443	10.2187	12.4711	3.92885	11.4969	5.80259	7.19874	14.5363	8.30055	7.73703	7.56582	8.76845	8.37516	6.03402	10.1329	8.72816	4.15386	12.9556	7.25313	8.04329	9.36488	13.8363	11.1715	8.58259	7.49307	9.74927	7.34892	13.8798	7.86581	7.5167	8.87652	4.96989	11.3309	11.6778	7.75084	8.10676
ENSG00000159884.10	2.24122	3.34758	2.10445	3.28348	3.43819	3.5087	3.87394	2.14509	3.88478	2.2397	3.29001	2.78905	1.83969	3.2814	1.8735	2.91157	4.19658	1.66811	5.00659	2.25215	6.21326	3.00558	4.08574	4.50408	3.41477	2.13893	4.28181	7.58865	2.06691	7.46626	2.33894	2.47578	7.62196	2.31385	2.11188	2.50168	4.22334	4.71579	2.08283	2.43253	2.27391	3.22353	2.87446	5.27422	6.43033	1.69945	1.77717	3.76727	2.84891
ENSG00000180185.10	14.6117	7.42447	11.0286	20.2569	17.6208	13.9555	15.2139	11.7859	13.5935	10.4158	17.8497	8.95307	10.4967	16.651	9.32201	27.6205	19.4918	13.6081	11.6702	16.0942	30.1572	17.8429	13.0799	15.5444	19.6998	9.78338	19.6734	17.8796	9.87182	18.5515	9.17369	6.37387	8.15375	16.2832	10.7842	10.451	15.2765	13.3509	11.3076	25.1224	23.6997	7.94628	19.2001	10.1135	17.6625	12.0053	13.7411	13.0211	15.0451
ENSG00000188766.11	0.117183	0.402212	0.107656	0.222299	0.303195	0.294265	0.238794	0.241158	0.171128	0.218201	0.336081	2.41439	0.167246	0.166836	0.141037	0.0975178	0.0994414	0.138346	0.163904	0.181408	0.260481	0.0979884	0.0655843	0.23101	0.0139282	0.361236	0.0408699	0.419579	0.166591	0.258349	0.153143	0.408092	0.66786	0.0364367	0.165017	0.581168	0.156118	0.22894	0.358517	0.129692	0.0802502	0.724915	0.256533	0.0310594	0.039342	0.144301	0.282175	0.19564	0.320978
ENSG00000167754.11	0.0143347	0	0.0173595	0.0394302	0.0256091	0.0347967	0	0	0	0.0238174	0	0.335027	0	0	0	0.0247102	0	0	0	0	0	0	0	0	0.06588	0	0.193314	0.405271	0	0	0.0241455	0	0.0877491	0	0	0.0121993	0	0	0.0115621	0	0	0.0109431	0.137886	0.0275457	0	0	0	0	0
ENSG00000167755.12	42.0303	15.8127	14.4347	0.511266	6.46974	15.6314	0.103076	0.598342	2.40755	8.26853	0.0987484	6.62882	0.888155	41.6099	4.43371	0.144697	1.89358	2.65884	9.14439	74.4597	0.0840225	2.35694	0.166825	2.56716	4.464	4.01046	105.284	1.38692	0.157628	5.89613	49.4967	28.5742	9.51825	16.1762	54.4864	6.94974	0.703856	0.141543	4.23641	0.384875	0.654916	0.61334	5.8827	12.858	1.19346	1.05563	48.9137	6.52507	19.3286
ENSG00000124767.6	120.683	42.9782	50.7168	77.2051	47.5423	70.301	75.8707	65.251	44.2775	73.9948	73.7284	39.6287	83.3298	56.4727	55.6831	48.9388	21.487	96.3402	19.3698	41.3893	48.5097	105	64.1211	47.8777	117.72	40.1666	121.848	49.8655	67.0872	28.7705	64.6371	52.255	56.3258	54.3065	87.9033	53.9461	54.9642	77.5009	77.2533	128.764	67.4768	51.552	38.9955	57.2648	23.857	72.8827	58.3992	61.8011	48.7937
ENSG00000143643.11	3.92108	4.13779	5.18449	4.78159	11.4925	4.03762	2.74424	4.59584	5.24585	8.18343	11.072	6.73413	1.91789	3.2864	6.84573	3.82083	1.85745	4.43912	2.39599	6.8696	3.53185	4.61677	5.02843	3.31195	2.87632	4.34664	2.037	2.68937	6.53439	5.1468	4.22151	5.70831	2.88698	1.78561	4.35295	4.28971	3.92483	7.37956	4.26531	2.22689	3.25121	5.02471	5.11913	3.17823	2.7447	4.82621	4.94907	4.41894	4.53076
ENSG00000167759.11	0.118063	0.239194	0.0285951	0	0.126552	0.0286592	0	0.034653	0.0370369	1.5497	0.0583339	0.467888	0.0900156	0.2178	1.10353	0.183166	0.0726363	0	0.287335	0.0942283	0.0330899	0	0.0547493	0.0143608	0	0.904671	0.254747	0.418753	0.00705423	0.46728	3.55971	0.134983	0.132498	0.021292	0.12688	0.0502379	0	0.148647	0.0476139	0.0210517	0	0.0901293	0.0908523	0.453742	0.178808	0.0294149	0.0254985	0.0597211	0.0130254
ENSG00000129437.8	0.0817782	8.01396	0.321862	0	0.182622	0.0330854	0.109835	0.0600073	0.0962034	5.28219	0.101015	0.70635	0.0445362	0.0538796	0.532161	0.246697	0.545054	0.0166658	1.07806	0.0815859	0.229202	0.156561	0.37923	0.124341	0.04698	2.39884	0.220568	0.105093	0.232096	1.68059	0.120529	0.136352	0.0417168	0.184353	0.065914	0.104394	0.151901	0.450461	0.115432	0	0.0812057	0.171681	0.196657	0.078573	0.0884675	0.0848947	0.0588731	0.132965	0.0225556
ENSG00000174547.12	38.5619	16.0714	21.6768	32.7303	19.3903	16.0467	16.5253	12.5273	19.1908	21.1969	16.5693	14.8414	16.8026	23.9145	21.0457	39.2051	40.1151	26.5505	32.2523	19.1053	30.4723	28.6581	25.3931	46.5423	43.9737	16.4402	42.5833	21.7172	29.2915	13.8088	24.232	16.5474	15.0248	59.6477	22.6365	17.4572	22.4313	21.7743	25.6686	57.5768	21.8242	19.5993	30.6833	42.2512	8.54112	29.3357	22.0571	23.2396	19.089
ENSG00000109832.11	0.00513329	0.0135652	0.00310823	0	0.00229267	0	0.00275778	0.00753342	0	0.00426453	0.00211359	0.0391219	0.0139779	0.00901885	0	0	0	0	0	0	0.0035968	0.00982745	0.00297557	0	0.00294897	0.00204867	0.00173065	0.0026387	0.00306712	0.00390711	0	0.00244541	0.0392789	0.00462879	0.00275832	0.00655291	0.00572096	0.00605911	0.00207021	0	0.00254867	0.0117563	0	0	0.00277659	0.00213156	0.00184776	0.00370946	0.00849498
ENSG00000133265.9	26.4939	21.0657	28.3231	36.5891	38.381	29.2701	29.5636	38.1835	25.6844	43.7923	35.9525	49.2494	43.8713	31.1895	63.8097	44.8379	90.8177	33.9612	81.9123	28.1287	40.0191	29.64	49.9914	44.7618	50.8055	21.6202	54.8368	23.7173	27.332	34.2327	29.0701	32.1648	21.062	70.8983	35.1836	20.8473	27.3253	25.65	27.8229	12.8376	26.3411	20.9795	70.6475	108.297	12.6802	30.7256	14.3168	34.674	24.2651
ENSG00000106853.15	7.55039	7.12754	17.0691	9.71893	6.17007	5.60458	14.0022	6.52757	8.56269	5.09845	8.14688	9.36087	4.84001	9.11587	5.5739	9.26224	5.82289	12.5744	9.16718	7.20237	6.91413	8.91344	6.23658	19.1503	9.2749	7.96269	10.0449	6.92788	9.48294	6.06665	4.8148	7.90341	8.64502	3.18029	9.64678	10.6354	6.7498	9.98422	4.66252	7.63963	8.15499	7.40179	10.2144	4.52639	6.53578	10.3733	5.66019	12.1682	8.07013
ENSG00000106066.12	1.40469	11.786	1.53786	1.64897	6.97714	5.26397	2.66794	3.25531	3.07681	2.77595	5.4098	10.6117	1.7077	2.14387	1.95155	4.31696	2.61882	3.96723	4.66179	3.82196	8.82834	0.896404	0.287864	1.78628	18.2586	5.49278	1.64558	5.441	15.3278	1.12315	2.13305	5.31955	4.88564	22.3133	5.78676	9.51521	5.11292	5.2309	10.3057	8.82964	0.521309	14.9261	5.0635	1.90857	1.51191	3.31708	4.77025	3.47072	9.81495
ENSG00000148341.16	8.89528	8.75449	19.3463	19.5324	7.47671	8.86055	11.1008	9.85628	15.4143	9.66343	13.7454	10.3465	8.85921	17.834	14.1102	23.636	26.5789	10.7775	19.4371	18.5571	15.4382	18.3788	17.2991	16.7333	29.2626	14.4667	19.0045	8.2584	11.7497	29.9775	10.1421	6.71912	8.76668	11.6522	7.75827	9.84303	10.0506	15.0147	13.0369	11.9361	8.77775	10.1302	21.5014	17.0198	18.4069	19.0721	10.8324	15.4719	10.7575
ENSG00000133488.13	0.162544	0.405674	0.0218714	0.0124196	0.0241988	0.0365339	0.174648	0.282717	0.00708204	0.0225058	0.0743623	0.431279	0	0.182453	0.416682	0	0	0.0147223	0.402914	0.108108	0	0.864396	0	0.0219681	0.29051	0.0288312	0.00608895	0.0139256	2.06109	0.0137464	0.0304211	0.0344146	0.0460649	0.0814271	0	0.461101	0.20128	0.0142118	0.320479	0.0161016	0.107604	0.0827239	0.0173724	0	0.0195377	0	0.0325048	0.208816	0.0697383
ENSG00000167635.10	30.0391	22.3323	19.3585	24.9488	29.4975	28.445	26.4792	28.8863	20.0579	30.7621	30.648	30.3156	23.1196	22.8438	49.6736	14.7877	3.43414	35.7475	9.52788	21.986	26.3499	23.3856	25.7875	21.6479	17.2109	20.697	16.4206	22.257	29.0738	18.4006	25.3472	28.3534	16.7522	12.5849	31.0049	27.5488	26.9812	33.6265	24.0447	13.3906	42.2178	24.8123	9.69756	10.016	8.22917	20.9174	26.0609	22.178	25.6059
ENSG00000142168.13	145.446	69.3676	109.75	81.6744	177.064	321.687	129.064	94.0059	102.995	119.641	73.5567	82.4551	196.947	169.627	119.681	118.977	170.186	67.0931	84.2123	126.979	127.741	107.114	81.4318	91.8484	207.619	115.231	102.812	115.679	161.942	73.2307	100.088	100.233	98.28	101.213	255.48	96.3828	88.5061	63.1873	133.558	132.067	82.0206	78.1436	121.741	214.314	64.9153	84.2602	76.4548	116.476	74.4377
ENSG00000104903.4	0.243106	1.51239	0.634809	0.846334	0.82112	0.583981	1.00403	0.438534	0.732845	0.441794	0.87585	4.07608	0.752996	1.19461	0.494369	1.16553	1.35545	0.433504	1.17099	0.439594	2.57639	0.484808	0.977628	0.711545	0.270591	0.836817	0.455912	1.40196	0.531089	0.832661	0.377498	0.868585	1.92221	0.917957	1.06954	1.3254	1.15149	0.860855	0.839492	1.05661	0.203685	3.47976	1.18384	0.583944	0.665698	0.271298	0.574268	0.79603	1.15665
ENSG00000170099.5	7.63826	2.59213	0.201424	0.615884	0.251431	0.55904	20.2221	4.0933	8.07751	0.850328	0.273936	2.48323	0.0139356	0.8542	2.77779	0.330826	1.81046	0.458904	2.54296	0.0765859	0.537889	0.816477	0.118663	7.47011	0.117602	0.153185	0	0	22.0318	0.350577	0.0323265	0.231611	0	0.276887	0	0.185104	1.65406	0.211427	0.227035	0.31939	4.49751	8.87843	1.13224	0.0983435	0.0692048	2.93266	0.902663	1.19268	7.28359
ENSG00000181264.7	0.376536	0.658683	0.661506	0.269874	0.440561	0.184521	0.501446	0.358016	0.282825	0.343652	0.541534	2.34962	0.560306	0.61962	0.272948	0.246831	0.250147	0.246418	0.365696	0.338614	0.535096	0.412888	0.479565	0.335442	0.286385	0.262449	0.597186	0.684253	0.263004	0.694283	0.31712	0.565915	1.26069	0.74601	0.227975	0.649917	0.472837	0.513304	0.376427	1.03074	0.0842591	1.04453	0.336685	0.397446	0.349965	0.0528521	0.500148	0.425389	0.403713
ENSG00000177963.11	11.1121	13.2478	17.5176	17.6912	12.9623	15.1778	18.4141	14.0692	16.3566	15.1974	9.87455	16.9394	15.9215	17.8419	12.2374	14.8292	19.1249	11.8668	18.8632	11.6624	21.5526	9.30568	12.5209	18.397	11.4194	14.0838	13.9339	15.6221	14.4522	11.6925	13.0245	14.5385	17.0182	21.9642	14.2199	15.7131	17.1839	17.6222	17.2167	12.9691	16.9827	15.3641	17.068	15.5773	14.7972	13.3909	16.5481	17.7043	20.1314
ENSG00000224424.7	0.254072	0.165188	0.300358	0.108159	0.27018	0.166424	0.194995	0.3196	0.237213	0.130664	0.199261	0.540945	0.158134	0.207252	0.150304	0.291981	0.173682	0.207112	0.245375	0.138807	0.38148	0.301111	0.238447	0.338479	0.653342	0.111056	0.0693428	0.307849	0.628916	0.681443	0.0764216	0.230544	0.203669	0.174554	0.130022	0.159594	0.373051	0.323697	0.248844	0.593257	0.264307	0.253993	0.197842	0.162743	0.26831	0.246171	0.605344	0.288514	0.280306
ENSG00000160193.10	7.58975	7.05908	11.2559	7.66522	6.84142	6.03621	4.21231	6.43497	10.3844	8.2177	5.03139	8.34559	4.59995	3.82403	11.4373	13.5159	27.9352	7.32275	15.4104	10.4988	6.56109	7.01383	6.71211	9.04246	11.6735	9.75367	7.66775	5.04026	7.95797	6.21813	11.9315	9.89451	2.68414	6.30537	6.20343	10.6572	10.153	14.0695	16.355	6.01818	10.3725	8.6745	16.3993	13.0047	2.22818	7.97062	13.6381	13.8396	7.34226
ENSG00000163463.10	3.91411	3.27869	6.45005	5.35769	7.1475	3.2974	5.70284	3.49015	4.05568	8.65403	6.02312	7.02963	4.9985	4.94545	8.22152	3.65116	10.4656	4.67494	4.06962	5.69054	5.9798	8.11784	6.09577	6.29026	7.25808	4.1277	7.43747	4.62888	5.62835	5.97717	4.72043	6.1013	3.77851	4.32244	2.72219	4.16908	3.18423	6.72051	4.74059	4.47243	2.07865	5.20542	5.07561	9.72308	4.03328	4.59818	5.51525	5.09301	4.2636
ENSG00000147613.6	0	0	0	0	0	0	0	0	0	0	0	0.0144875	0	0	0	0	0	0	0	0	0	0	0	0	0	0.0113798	0	0	0.00851856	0	0	0	0	0	0	0	0	0	0	0	0	0	0	0	0	0	0	0	0
ENSG00000100307.11	1.58794	3.29828	2.273	2.36741	2.30638	1.61381	2.3409	3.13206	1.98511	1.72815	5.8504	8.10675	2.00631	3.30046	1.46733	2.34861	2.54008	1.2815	1.59738	1.57787	3.5204	2.07128	4.10529	2.56893	2.63455	2.30681	0.738802	4.7637	2.68887	7.0149	2.40459	2.26637	10.2551	1.33451	1.55635	3.34875	2.97079	4.92575	2.10565	0.917386	0.7348	5.43808	1.54578	0.988655	2.27097	2.40279	6.50011	4.6198	3.63695
ENSG00000123975.4	139.62	66.7369	109.351	142.265	54.3822	155.261	99.721	73.2926	85.5195	91.6818	88.6506	77.1053	119.15	75.0105	102.674	104.214	92.5103	220.76	57.0722	104.392	48.6981	143.515	79.7674	127.419	200.345	116.688	302.267	70.3394	186.477	90.2643	99.7486	31.5622	26.5805	108.471	106.346	84.6424	72.9199	76.439	159.071	251.161	107.667	137.777	93.2525	372.212	21.87	91.5873	25.4903	93.6032	46.1428
ENSG00000196177.11	7.91736	5.04873	2.48187	7.1326	4.2704	5.34269	4.46106	9.46215	5.68342	4.1164	7.33714	3.69546	10.2699	3.55078	12.6887	5.42655	1.32846	4.78646	1.87463	3.96449	3.94434	6.34339	4.91438	3.25315	5.97163	6.56447	2.11755	5.79706	6.75185	1.79343	3.05645	3.36023	2.88321	1.99489	11.6271	5.65149	4.18531	3.27309	4.47327	4.05958	9.28008	3.95325	2.04787	2.4823	2.65555	7.51593	4.74802	6.37283	6.04335
ENSG00000090861.14	21.1666	42.204	31.0684	40.6385	37.3344	45.3324	22.1259	35.769	41.9053	39.1426	27.0653	31.9954	63.1448	40.4926	33.6385	56.4652	27.916	39.3485	54.809	39.5218	36.6828	34.4311	24.2642	39.9973	63.9283	45.4121	31.6813	55.044	52.3821	44.9317	56.4436	33.4424	31.839	63.3204	30.0108	36.9327	55.9002	70.119	42.4565	26.348	41.4092	53.1448	56.4696	24.5482	17.1593	41.2515	51.7102	63.459	34.0693
ENSG00000145375.7	1.47682	1.48817	1.06124	1.48976	1.48344	1.56462	1.66089	1.82157	1.26187	1.69473	1.41252	2.30651	2.17811	1.02475	1.52805	1.02028	0.20623	1.13594	0.256396	1.67113	1.81993	1.14046	1.51226	1.42591	1.61758	1.81404	1.12367	1.25982	0.705575	0.870379	1.75195	1.02382	1.31032	0.891241	1.4636	0.938953	1.14423	1.47865	1.3789	0.440592	1.47219	1.2963	0.315066	0.883386	1.13139	1.18592	1.25969	1.20215	0.960469
ENSG00000128254.12	0.054037	0.107099	0.163599	0.0743194	0.0603361	0.120241	0.0435458	0.105737	0.105948	0.0785608	0.133496	0.233369	0.117714	0.0593372	0.0159836	0.232874	0.0277045	0.121136	0.0547967	0.026955	0.0378628	0.0172419	0.0939697	0.115026	0.108651	0.0862636	0.0910912	0.104164	0.096861	0.102823	0.273061	0.141583	0.096479	0.0730894	0.0580725	0.0689811	0.140521	0.106305	0.217927	0.120441	0.20122	0.0928167	0.363849	0.129798	0.0584572	0.0336578	0.204235	0.0976219	0.119233
ENSG00000164252.11	9.7014	6.24806	7.87968	8.25856	9.98581	10.0249	7.75236	11.993	7.32883	8.44927	7.60264	7.81791	10.1784	11.1598	5.30621	3.62285	2.39553	7.42264	4.58589	6.48203	8.75667	7.52615	6.70582	7.38386	5.68645	8.61227	6.81989	5.01341	5.95353	5.59159	6.47955	6.51669	6.78677	4.30629	9.59403	9.46991	7.96787	6.72227	7.63581	5.55424	8.34311	7.338	6.41676	3.38951	5.97827	9.28412	12.9146	7.04781	6.62993
ENSG00000165060.10	7.50605	4.94999	4.15929	5.64404	2.32616	6.94769	5.58747	3.88878	4.05304	3.1815	4.07648	3.95705	6.09434	4.10077	6.03821	4.57242	2.51318	7.24913	6.05001	4.7456	5.77343	4.94949	4.24348	5.41335	5.11335	4.44034	6.18655	5.94714	8.58912	2.11096	6.13829	1.58239	3.84133	4.02757	8.54313	5.46849	3.46236	3.87002	4.55208	3.07644	6.28464	6.17326	2.90045	5.49991	1.41294	2.86575	1.81091	4.25887	2.86413
ENSG00000182944.16	26.6967	28.3593	36.2539	24.6738	16.7814	28.8226	26.128	24.0023	25.6128	29.337	23.5679	28.954	28.6306	17.8825	36.1572	24.8454	24.0051	39.6452	23.1301	19.0586	32.9613	22.4431	25.9647	43.2975	25.9093	29.0165	22.1589	24.1305	37.214	24.4871	43.0781	25.674	21.7611	21.4451	24.6855	25.5847	27.3917	28.5286	35.7461	9.66046	20.9773	29.5106	24.5231	19.2301	15.2694	23.3509	26.6615	27.6427	21.709
ENSG00000114626.16	2.77838	3.29599	3.12665	3.49263	6.57454	3.1929	4.45516	4.62978	3.19443	2.17372	4.4585	9.90304	3.71455	7.25106	2.39592	4.76282	9.06439	1.51723	3.36061	2.43354	10.4817	3.13293	11.3697	2.42333	5.55213	4.98285	6.21791	4.138	2.90571	15.2635	3.5992	3.90279	5.9012	4.25314	1.79318	3.23684	5.35976	5.08827	2.08559	3.73791	0.968113	5.73645	4.81131	7.13097	9.50052	4.4068	5.5789	3.77043	6.51315
ENSG00000004975.10	2.71499	5.27465	3.55606	14.0042	3.91668	5.91317	8.46122	5.56388	6.55451	4.58828	9.08525	7.70053	8.77015	8.54408	4.85245	8.1692	5.7495	3.73316	6.5932	4.46279	9.25414	6.45546	8.92405	5.34422	7.54664	5.18613	5.64734	10.0857	4.23941	5.43416	6.43821	4.69243	5.3501	5.59922	5.44042	6.2758	5.79823	9.5216	4.30471	3.10365	7.44143	6.46807	6.76535	6.17037	2.98498	5.95139	7.51211	8.84629	6.4353
ENSG00000089009.14	351.731	252.589	219.05	171.791	205.633	163.21	266.1	137.663	115.704	181.004	166.803	238.059	225.935	123.695	293.021	71.2027	50.0142	189.03	98.0153	186.453	185.988	325.239	238.864	212.689	224.246	195.857	269.482	187.333	242.001	111.675	263.784	100.341	123.527	108.798	192.672	139.177	173.971	129.439	168.898	159.198	159.086	157.757	62.8884	78.5233	66.3519	205.34	161.145	226.448	110.722
ENSG00000168496.3	23.7622	26.4147	33.7557	32.6548	17.8603	40.7678	12.4422	14.922	25.2952	26.0958	16.4653	27.4888	35.4948	15.5318	29.6022	27.2472	18.1981	33.5023	27.1507	18.9078	34.9209	14.2547	16.8503	42.9541	19.8089	26.7366	24.4626	20.2562	40.6224	11.7906	50.2369	15.9344	13.5118	38.1286	38.0944	23.5101	23.4453	21.731	32.5478	10.2643	28.258	19.8263	25.7359	18.1728	7.16868	25.5552	19.0617	25.8363	13.7039
ENSG00000184304.13	0.114205	1.82286	0.23235	0.854466	0.746744	0.465741	1.25655	0.558676	0.383345	0.0796967	0.707227	1.3694	0.383126	1.11562	0.229708	0.590602	0.57147	0.316528	0.389123	0.177741	2.12537	0.174912	0.0900324	0.450086	0.162709	1.1741	0.0739267	3.32744	0.120097	1.16827	0.13081	1.58863	5.96565	0.304823	0.986778	2.47646	0.974113	1.63201	0.902736	0.912296	0.226811	1.8762	0.544877	0.087783	0.128489	0.38697	0.769556	0.868193	1.18437
ENSG00000182165.16	15.6115	6.73301	5.83441	13.3797	15.7865	1.08703	14.9822	12.2599	10.2817	5.6573	17.3955	7.60241	0.630712	12.2695	8.85179	8.18517	7.64769	9.19525	13.905	20.3351	9.86757	25.7193	16.7025	23.779	40.7974	8.54148	6.88762	11.323	13.9226	11.8119	0.390151	12.6893	11.3431	13.7431	6.22306	12.5369	11.9434	12.0843	8.57528	24.8631	7.33711	9.21246	10.8727	8.5903	11.9773	19.2939	13.3567	12.6036	11.4483
ENSG00000105610.4	0.0595358	0.0262215	0.0360493	0.040941	0.0531806	0.0481734	0.0639694	0.116497	0.140075	0.012365	0.0367701	0.211743	0.113481	0.117676	0.0352201	0.128285	0.0610473	0.157729	0.241491	0.0445468	0.166863	0.113979	0	0.0543132	0.102606	0.0475208	0.210757	0.0612073	0.0978243	0	0.0501413	0.0141809	0.0151852	0.107369	0.0799773	0.0760006	0.0884689	0.0702734	0.0840361	0.185776	0.0147797	0.0227248	0.0286339	0.114405	0.0161014	0.0741655	0.0642908	0.118311	0.131366
ENSG00000061936.8	3.51334	4.41818	6.00913	4.79997	4.6908	3.59411	4.15348	4.2271	3.92267	4.98281	4.34362	9.76925	4.17229	2.67648	6.49196	3.60323	3.60254	4.60594	4.09738	3.73317	4.87117	3.07277	5.70397	6.36489	4.10638	4.94758	2.52316	4.14443	6.17358	5.01797	5.24399	4.30093	3.74631	3.07549	3.25925	3.79803	5.36115	5.41368	4.59882	0.952585	4.77212	5.2128	3.93602	2.18767	2.36221	5.80845	4.13992	4.48766	3.81434
ENSG00000092621.10	3.01354	20.5159	2.53163	2.41143	6.62611	11.6805	13.9345	16.0985	13.4598	19.7271	1.11065	21.41	34.6825	1.56986	8.75664	13.8696	5.78249	6.46605	42.2612	2.19492	1.42934	3.88922	0.366468	28.4428	28.1934	7.43478	0.440501	12.854	19.7208	1.73872	38.3506	0.911552	3.98185	26.8924	5.05038	10.9508	14.9467	16.5531	25.313	2.24706	6.66707	11.4094	6.82723	11.363	0.993969	2.35919	5.07021	57.3717	2.05992
ENSG00000151093.6	7.13907	3.53469	5.02108	5.26983	4.15485	6.20076	4.9875	4.18708	5.79326	5.75666	4.87425	3.90327	4.34991	3.80138	6.98061	7.78802	5.98136	5.88173	4.67809	5.78151	5.77025	5.75407	4.29848	6.21428	7.73161	6.30696	5.78426	4.64966	7.17574	5.58613	4.27863	3.65066	3.71472	5.39749	6.19718	5.78358	5.38215	5.20525	5.45075	16.9105	8.00717	5.37721	4.67587	5.36653	2.19627	4.69405	5.96979	5.52396	5.02648
ENSG00000106038.11	0.0212006	2.84481	2.55886	0.15551	1.07944	1.04642	1.12378	0.110625	1.03087	5.51863	2.71769	2.70009	0	1.04295	0.581106	2.86275	1.31883	0.0979322	10.52	8.70002	0.0198065	3.98661	0.319519	2.03724	1.25853	0.16358	1.12457	0.181632	2.56724	2.24835	1.08322	0.316454	1.04544	0.0254894	0.00759462	1.26297	0.0315037	0.667315	1.97221	0.277219	0.203505	0.215794	9.20404	1.05922	2.6375	1.07402	1.92817	2.60954	0.171524
ENSG00000124227.5	0	0	0	0	0	0	0	0	0	0	0	0	0	0	0	0	0	0	0	0	0	0	0	0	0	0	0	0	0	0	0	0	0	0.0411686	0	0	0	0	0	0	0	0	0	0	0	0	0	0	0
ENSG00000112419.13	2.03934	3.656	4.56352	3.03998	2.90032	3.58896	3.99227	3.71785	6.83131	2.6483	4.91989	3.67909	0.613946	4.61784	2.07317	2.28176	0.861559	4.63962	1.41293	1.85131	1.7514	2.84802	1.76708	3.01986	1.94533	3.60438	1.1203	1.745	8.2722	1.57471	1.49885	4.36072	2.70309	1.27925	3.90457	3.39026	3.37707	4.31593	3.24213	1.80687	5.45468	3.2845	3.1354	0.628797	3.24301	5.29835	4.85583	4.8406	4.27857
ENSG00000010282.13	0	0.028879	0.0099257	0	0	0	0	0	0.012856	0	0.00674946	0.108273	0	0	0	0	0	0.00668132	0	0	0.0344576	0	0.00950207	0	0	0	0	0	0.00489721	0	0	0.0156181	0	0	0.00880829	0.00697526	0	0	0	0	0	0.00625699	0.0157679	0	0.0443332	0	0.00590055	0.00592282	0.00904251
ENSG00000038274.15	17.4645	13.711	12.006	16.9301	22.3653	18.254	18.3204	29.2743	14.4072	23.3868	25.3744	14.4666	36.3216	26.9838	14.3604	16.8124	9.59992	17.8201	12.8139	13.18	23.2047	18.6982	17.1977	11.5445	19.1626	15.7751	23.084	11.4735	9.13542	15.4208	21.4317	16.1664	16.4997	11.4607	22.9297	18.1384	18.2647	12.7804	14.8432	42.1687	15.0272	16.9727	13.0926	16.5679	16.0477	13.1522	19.4287	17.9237	20.673
ENSG00000101417.10	6.72807	1.90014	5.31486	5.8026	2.88105	2.11061	5.93009	9.32498	4.66287	2.26673	6.54287	3.68557	4.37887	8.80921	4.61212	4.33226	9.4674	9.08914	3.39244	3.00709	3.45228	5.24207	2.96161	3.85269	7.52574	4.06489	2.22226	5.04194	7.26817	5.14301	2.49322	5.69232	3.05407	9.90108	3.67533	3.23465	9.5671	6.4868	3.944	5.25642	6.93177	5.20575	6.9457	5.02829	3.1174	8.40715	9.7409	7.06996	7.36796
ENSG00000203965.11	1.49134	0.669641	0.830068	0.725598	0.597425	0.840332	1.08017	1.80862	0.583171	0.773047	0.906532	1.29171	1.14927	0.857581	0.958427	0.558554	0.289654	1.08702	0.370704	0.323261	0.978007	1.07099	0.717584	0.550774	1.03573	0.855475	0.92716	0.538117	0.8315	0.834729	1.0286	0.657015	0.597591	0.674258	0.772336	0.784842	1.12965	1.22911	1.07556	2.31846	0.738386	1.04018	0.391597	0.550803	0.260649	0.593394	0.897186	0.942599	0.792873
ENSG00000139835.12	23.2564	8.36754	23.5879	18.8427	15.5188	9.43528	19.1298	15.3916	11.3692	31.8634	19.7201	10.6189	11.7095	45.8498	18.9497	15.2402	17.5144	21.9454	14.6016	12.0873	5.35208	22.9307	16.1375	13.3436	18.0192	12.4856	17.8075	9.69491	19.3529	13.4955	14.5018	24.0625	4.89964	6.71183	4.72443	10.719	13.4998	17.3926	10.0542	3.49191	7.63332	7.66113	24.4809	13.7255	15.3396	20.6099	14.9408	20.5287	9.14428
ENSG00000171720.8	13.1754	11.2587	13.3841	13.1595	6.85572	13.766	10.8744	12.7904	11.2238	13.2282	15.5646	11.1422	15.7494	11.9562	11.1269	12.551	10.8184	14.6567	12.8677	7.71819	15.1652	13.5898	12.1247	14.5636	18.3831	10.2428	13.138	8.83469	7.88449	14.4484	13.1045	11.2758	10.0281	15.5393	13.0706	12.6976	10.5571	12.8681	14.4239	13.6396	9.73996	14.0384	16.3697	12.8606	6.83596	17.3755	11.6842	11.5139	11.6004
ENSG00000076864.18	1.37519	9.65458	1.37617	2.72378	33.6779	4.60086	2.8269	4.7131	5.37317	3.49577	3.2685	5.8909	56.9721	6.42369	8.6517	8.05564	6.24836	3.88327	7.44858	6.76941	9.25489	10.7306	22.7401	2.45903	8.66182	6.68456	0.868971	36.2571	1.34813	59.1605	55.2116	4.54658	4.26788	5.24973	9.52661	4.08215	3.79027	2.2712	2.46084	0.93972	4.0558	0.779506	5.94864	19.2655	9.96832	5.88819	2.99672	8.99732	8.14918
ENSG00000165621.7	5.48047	2.79449	0.259002	0.15933	3.56612	0.836431	5.21835	7.32365	0.887581	1.72494	1.34292	0.48899	0.155299	0.955055	5.48263	2.51927	0.548255	1.89597	0.542197	0.364506	1.86072	2.59317	0.227285	0.802122	3.74739	0.362759	0.060088	0.0229038	0.68686	0.271308	0.0375258	0.517915	0.172743	0.674985	7.93919	2.43442	4.03883	0.806422	0.718775	1.35062	2.22994	6.9934	1.3715	0.719213	0.125323	0.9917	0.615876	2.69819	1.08146
ENSG00000076344.14	0.533365	0.130506	0.424627	0.353195	0.467608	0.0799208	0.795951	0.782747	0.166545	0.512846	1.27292	2.06256	0.086065	0.221257	0.768369	0.587406	1.11407	0.213366	0.20032	1.35491	0.422165	0.189093	0.417954	0.222264	0.317756	1.10373	0.173161	0.540724	0.141637	0.593907	0.0956634	0.757552	0.428275	0.187035	0.615655	0.781738	0.686159	0.582927	0.219085	1.06551	0.0882719	1.26675	1.64365	0.18031	0.299182	0.258389	0.828393	0.428251	0.414086
ENSG00000162571.12	0.0120189	0.0582286	0.0509426	0.0991805	0.0322078	0.0145876	0.0193709	0.0293975	0.0235649	0.0299545	0.0544356	0.341968	0.0130909	0.11614	0.0284405	0.0310774	0.209509	0.0391898	0.0243757	0.0419672	0.0252643	0.0153398	0.181139	0.0292388	0.0966646	0.110323	0.0729377	0.0185345	0.136444	0.228699	0.263181	0.0400791	0.0245244	0.0108377	0.00645822	0.081828	0.0848341	0.241172	0.174497	0.0321461	0.047739	0.0917522	0.0693662	0.0230956	0.0585091	0.32939	0.0129788	0.156334	0.125969
ENSG00000140650.10	5.47982	4.14443	6.25327	5.61836	3.71822	3.19759	1.83497	3.64497	5.07303	4.08894	4.0812	3.98416	3.09232	3.63216	4.53074	3.02405	2.16113	6.5312	3.08015	3.99197	2.76678	3.57607	2.5081	4.79553	3.68934	5.04189	4.96564	3.72816	2.09451	8.30398	4.83178	4.08996	1.97636	2.95693	3.64068	4.52635	5.83082	3.79747	4.48243	2.62513	3.47477	3.83074	3.98311	3.07921	3.18532	4.73367	4.85537	4.61612	4.21621
ENSG00000136999.4	3.10263	1.14005	1.66396	0.987548	6.0655	0.351469	2.18118	4.41454	1.00112	1.64963	3.71566	2.82849	3.51455	1.68985	9.4552	0.519553	0.99987	0.231239	0.431486	1.92795	1.54041	0.543072	0.852993	0.140175	0.865738	0.643887	0.071728	1.74524	0.0741526	1.52486	1.94859	3.47128	4.61249	0.351712	0.895506	5.20546	0.90233	1.32537	0.400406	1.31194	0.123236	3.78291	0.767427	1.55013	0.479489	2.81964	1.81243	0.864792	2.90465
ENSG00000180891.11	5.59984	6.04425	3.22609	5.35262	4.95655	3.62008	4.87101	11.7348	4.8749	4.54624	7.00105	8.06925	7.64498	7.25575	3.8079	4.23328	5.30636	5.19864	7.92759	3.09429	8.69885	4.62013	8.94995	7.90711	8.86994	4.14417	1.28633	3.29349	6.56231	7.78066	5.69667	6.9586	8.21001	7.50911	3.3469	4.01719	8.64955	8.20459	3.91703	2.48489	6.03739	7.51193	5.97503	4.12304	3.07491	2.97808	6.90048	6.93881	8.4749
ENSG00000185002.8	0	0.362066	0.0210324	0	0.263733	0.623017	0.00622033	0.0226561	0.0635636	0.0144284	0.042906	5.78865	0.075667	0.0101713	0.030823	0.00997948	0	0.023596	0.187859	0.0981852	0.0324512	0.0221664	4.42964	0.00704182	0	0.00924177	0.0156144	1.40164	0	0.211505	0.0390056	0	0	0	0	0.0246341	0.012904	0.0136667	0.0233474	0	0	0.00441948	0.0779614	0.255866	0.0688903	0.0240393	0.0208386	0.00418346	0.0383218
ENSG00000134982.15	0.6	2.00837	1.36556	2.1403	2.16083	2.46598	1.97702	2.66118	1.85534	3.75504	1.25013	2.43298	3.40866	2.27732	1.28683	0.699373	0.183594	1.56513	0.463569	2.10741	1.56152	1.53643	1.76438	1.8929	1.10738	3.13498	0.97868	1.48337	0.629364	2.51681	1.16465	1.9019	2.88971	0.453437	3.77263	2.59201	1.34587	1.7147	2.2738	0.383789	0.692262	2.7177	1.29353	0.124447	3.24952	3.81075	3.43638	1.26082	1.84086
ENSG00000143374.13	12.1992	10.7357	8.44598	13.1571	17.5734	6.64965	10.3725	13.6186	9.24834	19.1298	17.5217	11.3156	12.3821	8.63866	17.1808	12.1025	6.98452	10.3709	7.07236	12.3677	12.9907	12.6547	7.64753	12.0676	10.3771	8.86981	7.89661	11.2601	14.7899	11.1741	6.86255	13.8989	6.14304	9.8421	11.8611	9.86264	9.59936	15.3987	9.57252	4.58053	11.0462	9.49925	13.6185	14.7421	3.35115	13.1963	15.5062	10.3779	8.19459
ENSG00000085276.16	13.9444	11.8016	6.97915	8.04792	14.2718	11.8475	7.36693	30.2398	10.3481	14.0605	11.3522	2.97837	1.3212	5.85615	11.5707	7.06717	2.2634	12.4301	5.65932	8.41913	11.1439	6.55145	6.82914	6.7789	4.12426	10.1849	5.05843	1.03565	7.77647	5.15915	10.5426	7.10041	5.63275	7.22935	11.7743	10.5756	11.3604	6.18798	6.24827	3.30932	14.1776	8.26254	6.97073	7.96816	6.90186	10.0003	13.2638	6.74344	10.2465
ENSG00000105205.6	0.111946	1.01896	0.316325	0.153964	2.13326	0.483099	0.360848	2.81115	2.9265	0	3.25723	0	0.0406437	0.688387	0	7.78326	1.14788	0.0304184	6.35711	0.297821	4.07881	0.0476257	0	0.862396	0	9.94809	0.226451	1.53452	0.0222958	0	1.60278	0.39108	0.0380707	0.605664	1.00255	14.7033	0.665397	1.292	1.89617	45.511	0.111162	4.89968	5.59943	0.0717056	0.484412	0.0929697	4.24448	0.0808955	3.45814
ENSG00000178694.8	2.41368	1.65941	1.57862	1.84488	2.17105	2.54166	1.80726	2.68649	1.88306	1.58948	2.78406	1.97839	2.60606	2.5119	1.83585	1.50047	0.353565	2.36176	0.938108	1.64449	2.18032	1.97501	2.00849	1.23268	1.42526	2.20515	1.22489	2.54413	2.14817	2.66928	1.7849	1.89502	1.69889	1.25886	2.76565	2.02907	2.77748	2.30964	1.64497	3.13412	2.7684	2.09299	1.02738	0.953487	2.26539	3.14299	2.85771	1.81408	2.23609
ENSG00000124882.3	27.4876	3.18725	7.86521	11.5775	1.74377	0.275002	3.73636	0.300075	17.8389	5.96372	10.311	0.0884454	0.0180575	19.7997	1.03226	0.157183	2.67746	31.1679	1.04234	3.51471	0.127781	3.48604	0.225837	22.3993	61.1644	0.638493	1.20452	0.0468717	18.5659	0.214517	0.51313	18.0979	1.22206	12.4155	0.28507	33.294	18.2982	15.0224	20.6367	15.0689	43.4328	17.0448	10.8282	0.302651	1.89213	32.9135	19.9349	12.9148	5.21283
ENSG00000135720.11	8.65314	12.708	12.0008	11.2751	14.564	14.2489	11.2321	24.8352	17.1039	13.098	14.6805	10.9774	10.2886	14.4059	9.5099	8.26986	3.39886	17.5306	4.84166	8.76701	11.8414	8.88857	8.42565	9.41125	6.19944	14.3232	5.31744	17.3743	12.2081	20.9721	10.9738	13.8161	14.3537	4.84217	12.7508	16.8208	19.3259	22.5697	10.6759	5.07335	14.3996	16.791	8.77781	4.08136	10.9588	13.1151	15.6222	12.8908	17.4606
ENSG00000146535.12	4.4022	10.5351	10.0761	10.2879	9.07159	9.6335	7.99571	7.00031	8.39284	5.54849	10.3462	18.6134	9.79214	8.56769	6.34686	6.67419	9.96488	8.64156	13.9616	7.99958	9.12614	7.16032	7.66211	7.57289	6.53931	11.6354	5.19527	13.5575	10.0169	8.95277	6.76946	15.2941	15.3147	10.0408	8.07633	14.8968	16.0749	12.9729	14.0469	4.90854	8.86195	15.7126	10.8153	4.86579	7.92459	8.51774	15.007	13.5836	11.5802
ENSG00000152904.10	7.86938	5.40302	6.38843	12.1578	18.0763	7.05712	6.95817	9.09906	6.55221	16.5067	16.0241	12.529	8.24606	12.6838	8.26557	6.26256	3.06182	7.47982	3.35602	12.6483	8.54334	12.6956	9.10153	4.63849	7.25473	6.72814	7.65103	9.32785	8.94669	8.81637	8.82286	11.1369	9.29168	5.35144	6.8793	9.23303	7.94527	6.54491	8.46477	22.4176	9.0374	8.20628	6.03174	8.23635	6.82393	7.65135	13.4578	7.00829	8.65448
ENSG00000100532.10	2.23246	1.17075	0.748188	1.49236	1.71127	1.23927	1.64563	2.4026	1.60833	1.27668	1.40231	2.1261	1.54943	1.61452	1.01047	1.89732	0.71336	1.4728	1.15825	0.984117	1.83344	1.63669	1.33621	1.80612	2.35623	1.10645	1.57884	1.71602	1.7961	1.31984	1.07564	1.18222	1.99162	1.02994	1.9863	1.59945	1.1688	1.4871	1.43635	7.98912	1.87142	1.81127	0.948858	1.60623	2.13987	0.698495	1.42777	0.814125	1.98183
ENSG00000121058.4	17.4391	8.89312	9.19573	8.48606	9.44432	9.0613	12.1753	9.3726	8.03436	8.45224	10.8125	8.781	7.98112	12.4275	8.56324	7.4817	2.66223	11.9846	6.85165	7.31811	8.72334	7.35597	10.3717	11.4623	13.3159	7.40302	7.69868	5.50724	10.7142	3.89275	8.46328	8.13629	4.14882	8.75814	9.90017	8.4522	9.25586	9.14448	9.08304	10.8206	12.7431	8.6624	4.97976	5.72544	3.68851	7.45578	11.119	7.88331	9.50771
ENSG00000172765.15	6.26398	5.08261	3.65892	3.34268	5.43291	4.05578	5.58755	3.92558	5.17879	3.95766	5.03601	3.27345	4.03354	5.55861	3.05666	2.5963	1.02545	4.25889	3.0239	7.33765	4.1109	3.96449	5.24184	5.21593	2.53482	7.04622	3.44723	4.4568	4.05958	5.50813	3.11888	5.67359	3.85858	2.40472	3.13628	5.38245	4.555	5.54917	4.50979	2.68018	6.96943	6.26023	2.34951	1.93919	3.92419	4.3842	6.71737	3.83234	4.98832
ENSG00000134686.15	19.2991	29.0366	24.2136	15.6559	22.4763	26.5763	21.0331	13.0989	26.6367	23.4243	18.6498	26.7837	21.56	18.1294	22.0619	32.9806	26.9487	16.6717	27.897	29.7787	28.1598	24.4674	23.9145	25.265	24.6693	27.6343	25.8786	30.0332	11.7389	24.5859	29.0218	53.2067	31.0313	23.2777	25.0092	29.3909	22.7365	30.7442	33.8949	18.1827	27.8758	23.8992	25.8575	16.9227	20.8365	23.0645	18.5706	33.8913	24.7494
ENSG00000198855.5	1.20503	1.66802	1.48621	1.00051	1.42363	1.32553	0.859201	1.02685	2.26031	1.37939	1.30786	1.56872	1.85687	0.86345	1.4783	1.20614	1.04772	0.941566	2.02723	1.86147	2.06222	0.751274	0.766109	1.05373	1.05914	1.96358	0.498007	2.02957	1.44332	1.58923	1.4358	1.27509	1.50703	0.82121	1.31889	1.68715	1.46883	1.62556	1.49153	0.584202	1.05874	2.53932	1.18583	0.480194	2.15064	1.53112	1.09539	2.0586	1.90535
ENSG00000164649.18	8.49167	7.7413	7.51541	12.9108	14.2613	9.54415	6.83053	13.657	5.346	13.6597	8.00815	8.07335	24.4974	9.00268	5.39165	13.475	4.06737	10.1841	3.58597	4.97277	13.4078	11.8178	12.4541	5.43334	16.4392	10.0741	3.39628	4.96897	14.283	16.0343	23.6301	3.5133	5.78559	9.65005	10.0759	7.74644	10.9763	10.0232	7.48726	6.29508	6.30106	8.02769	4.29669	7.18649	1.4094	8.23564	15.8233	11.3648	7.68086
ENSG00000119408.15	13.2766	19.9088	20.7146	19.6169	11.4283	15.0599	16.6851	16.8087	25.3496	16.5134	12.9775	10.3799	12.7496	12.2236	13.9954	31.7229	21.4432	26.4798	18.4005	19.1299	20.8447	19.7646	14.4843	21.7911	17.1888	20.8992	12.6438	15.8572	14.8947	35.4909	17.6621	15.817	16.8442	14.9599	14.6657	19.5221	17.434	16.456	17.9099	10.0966	15.7714	30.8319	20.4045	11.798	6.87968	16.1517	13.9047	20.7923	14.3754
ENSG00000106069.19	2.97858	1.41955	0.546447	4.48788	1.75721	0.771597	1.06043	2.47052	1.32837	1.66566	2.02083	1.2265	6.01639	3.75304	1.6332	2.15342	2.26102	5.29097	2.46144	1.92043	1.21796	6.50806	1.85284	2.9444	3.65212	1.19938	0.744913	7.29786	3.04141	4.02662	3.50451	2.11359	0.793734	3.23504	0.66648	1.44147	6.75476	5.77743	1.19227	2.00156	3.1034	2.88473	2.33057	1.00378	2.47437	2.36106	10.0671	6.04441	2.57986
ENSG00000081692.11	4.83789	2.08965	4.12307	4.10856	4.07131	3.36361	2.84985	2.18665	3.46687	3.9872	2.38765	4.44735	2.73938	5.69713	4.31736	2.95341	6.20513	2.98576	4.76669	3.48977	5.26366	3.87578	4.15081	4.32834	4.9844	2.67372	4.26928	4.01398	5.70251	2.8756	3.82013	3.65192	2.82367	6.97196	1.66421	3.04702	2.7785	5.32369	4.15464	2.95706	3.92065	2.68295	4.51097	6.29971	1.79405	2.5402	4.9693	4.32933	3.71984
ENSG00000178764.7	3.23071	8.86941	13.6783	4.73357	12.0326	5.9438	7.43927	7.14755	6.43086	13.4323	5.73878	11.9983	5.73528	9.98844	3.39145	5.24	2.50387	8.49464	4.78937	6.55651	7.16781	4.88007	5.93563	3.94808	1.87619	5.56651	5.04799	6.56793	3.39236	5.9429	13.4988	6.7929	9.28344	6.17073	6.14481	7.81648	3.46432	9.03037	3.93105	2.99231	5.22376	8.1431	6.67925	4.48958	6.18551	2.41601	8.37009	4.11007	7.25055
ENSG00000169020.8	159.615	92.9706	138.439	124.012	83.8305	122.442	120.744	84.4694	101.892	134.906	62.2538	138.014	91.978	94.1126	147.931	129.925	150.382	116.264	86.6043	158.36	134.13	113.795	94.5686	232.478	214.671	107.081	248.619	66.1232	123.926	99.4623	68.7853	63.6451	86.4123	111.651	96.3869	80.0398	80.9657	66.3119	146.33	120.37	72.4153	58.1156	84.575	136.309	69.6467	142.712	53.0265	104.067	87.2138
ENSG00000110955.7	492.222	512.522	417.86	569.2	336.986	449.079	288.194	935.84	441.333	466.728	311.035	287.57	421.821	499.455	603.772	803.639	427.737	390.623	672.835	427.079	405.347	422.181	214.594	390.775	282.367	601.943	328.307	295.903	457.642	149.377	676.93	232.955	292.524	432.114	604.509	383.405	285.984	275.272	409.291	383.513	523.331	269.846	499.199	563.79	269.615	618.553	286.402	373.348	298.932
ENSG00000109062.8	35.896	36.326	73.2441	61.884	32.046	72.3936	43.3861	53.7962	62.8219	67.9242	46.1477	43.892	63.9589	61.1517	51.4383	40.846	69.4375	48.1766	89.4291	62.198	21.7307	24.9124	38.874	76.4815	74.6774	60.2284	63.1711	17.4206	45.7393	16.1109	26.6974	53.1974	23.6527	96.3568	60.2465	32.3345	61.9646	55.4866	62.8433	22.1018	45.5036	25.7074	74.7084	26.0807	206.009	76.3937	42.2815	65.8658	52.4983
ENSG00000173914.10	2.78864	2.46124	2.78659	3.5038	2.24138	2.73963	2.2075	2.42817	2.8788	3.20878	2.76561	4.76554	2.90609	4.18716	3.58786	2.9088	2.38193	3.21109	2.60006	1.94035	3.85416	2.87389	3.42984	3.27873	2.27241	2.66754	2.36059	3.21333	4.67127	3.52781	3.9451	2.4429	3.39287	3.19139	2.49054	3.56218	4.77073	4.65177	2.87678	3.41913	2.74736	3.8771	2.33986	1.89502	2.53075	2.37053	3.6168	4.0026	3.85026
ENSG00000128422.14	7.07028	18.9965	4.53559	1.50293	15.3342	13.7846	16.6688	1.37982	4.36564	10.0947	0.12306	12.2811	0.0610376	3.4378	5.65788	0.322003	7.35513	2.74851	6.6677	2.64628	1.64916	0.882118	2.98851	14.2804	0.450708	1.06606	23.5725	5.40597	0.647343	0.69667	4.37354	37.9796	3.30654	30.1	0.562092	33.8052	2.8868	4.82133	5.21311	3.29745	1.28915	0.377893	15.6143	9.56607	0.212181	1.07817	1.4927	3.00342	1.56625
ENSG00000143365.15	2.75391	3.97356	1.1743	0.666825	11.7696	5.74343	1.30446	5.77199	4.65114	0.931247	3.75625	0.855291	0.616807	2.28633	2.47127	6.66615	2.71246	0.15493	3.61861	4.60098	5.54424	6.02965	1.65479	1.59468	4.19359	1.3808	0.512616	0.699831	1.57361	7.32155	3.29609	1.96233	1.89948	0.734484	3.13047	1.50523	3.00867	2.78361	2.17433	5.0557	5.99307	1.77958	1.29838	2.40746	5.91638	4.39056	4.48452	2.54783	4.81415
ENSG00000137218.9	2.13904	1.81848	1.41568	1.99548	2.32543	1.13374	2.39632	1.4763	1.66456	1.53596	1.35865	2.62855	1.30037	1.68243	1.92264	1.90081	3.8086	1.88561	1.64785	1.39786	3.68307	1.82004	2.24916	1.97661	3.98181	1.1978	1.50941	2.08829	2.77906	2.51155	1.59901	1.90371	1.98779	2.91565	1.36323	1.54522	2.63648	2.85756	1.93931	1.71486	1.35841	2.87347	2.0097	1.19488	0.484327	1.94858	1.93385	2.99561	1.89341
ENSG00000117411.15	10.2583	15.5214	17.9383	15.6379	11.6491	16.23	18.8924	12.753	16.8294	11.2464	7.70265	13.8201	18.6108	9.11644	13.8987	22.9678	22.9957	11.6754	20.0279	15.4547	21.92	7.98551	21.8409	21.7924	21.9272	15.8296	18.108	18.4028	15.3927	15.7593	18.8716	12.1558	19.3681	22.9979	18.5653	15.8138	15.9624	24.2663	19.1984	9.29695	17.2603	17.0291	15.5536	23.6115	11.6343	16.0267	10.5598	16.8051	14.8105
ENSG00000184857.7	7.40327	5.36054	10.4887	10.3138	7.68307	6.44593	5.66346	5.40308	7.20595	8.08104	7.7735	8.94716	6.52395	8.25043	9.99942	10.7587	7.6895	9.85315	6.99713	5.64098	11.1469	7.01781	5.63853	10.7828	9.38695	6.36817	9.28111	8.02985	4.50217	11.0691	6.55791	5.54698	5.1943	9.54902	6.4885	5.7805	10.1911	9.08728	7.45937	12.9016	6.99457	7.7916	8.94188	7.64255	3.58972	7.34216	9.83149	8.33637	7.59938
ENSG00000125821.10	10.4205	11.4237	11.6625	28.1447	11.8005	17.9751	10.2788	8.87898	13.3136	9.01174	13.7216	15.218	13.9316	9.76684	15.4661	15.1163	13.7942	8.61054	19.6904	15.3028	15.1715	25.8818	11.3463	19.7314	12.766	16.3623	9.25816	13.9182	15.7527	6.99955	12.2111	16.3708	8.72155	23.6963	17.9072	8.17765	28.9914	13.857	26.9029	26.3861	14.5389	16.4534	28.0166	11.4893	7.43055	13.9269	10.1664	7.08781	19.2864
ENSG00000167994.10	0.567551	3.58982	1.03097	3.5668	3.30937	1.86883	2.68488	1.95118	1.23641	0.628665	3.12229	5.29464	1.05605	1.41263	1.20311	1.56264	6.22374	1.41366	1.79054	0.621265	5.74416	1.51916	0.968686	2.119	8.41382	1.53521	0.467735	4.52606	1.71439	2.2319	0.524465	4.16822	7.10931	3.17014	2.56681	4.88372	4.1407	5.03054	3.45241	2.64243	0.696644	7.97936	1.75911	0.560453	0.341097	0.792119	4.05749	3.10445	5.62668
ENSG00000180340.6	2.28875	2.86599	0.951072	0.879535	2.08452	2.75975	2.25425	3.8199	1.07347	0.866815	1.12715	4.95929	5.62122	1.33054	2.71459	1.04436	4.27956	0.704218	3.23108	0.49249	4.51232	1.27442	4.61743	1.36469	0.953903	1.26268	0.287472	2.91242	0.502764	1.94698	2.05988	1.98823	3.61707	1.53774	3.79801	1.90006	1.58381	1.63328	1.05877	0.640162	0.534758	3.68288	1.25186	2.97517	0.364112	0.465876	0.702694	1.0945	1.68338
ENSG00000105254.10	19.5561	14.145	14.3907	20.1061	16.1576	12.7167	23.2476	12.4836	13.9682	22.0052	15.9047	41.5179	19.6087	22.4427	29.7295	28.995	44.4736	16.8127	49.2415	14.8973	20.8659	17.3671	22.5149	18.9779	28.1417	12.6638	25.7531	15.6117	17.7207	10.4871	15.1202	17.6074	16.0851	37.7093	16.3385	13.8539	17.4042	16.3138	15.1875	38.6049	18.3297	14.6137	27.3977	44.7253	9.48731	13.7502	12.5708	22.1578	16.6708
ENSG00000106348.15	18.0335	21.7615	21.1649	43.1347	25.8649	28.8642	21.9002	16.9915	20.4558	20.7978	29.4502	28.0167	29.6638	29.9784	31.6832	21.94	32.4843	27.9766	27.7159	32.6706	21.0188	18.6971	16.8484	38.4794	44.5769	50.1961	19.3282	24.6632	46.5407	15.0704	7.94543	19.2777	21.6003	56.5377	26.0211	35.8981	27.7108	27.8263	25.4012	6.81872	35.9687	36.1878	54.6723	23.7488	14.5107	46.3591	22.2711	36.0132	22.7724
ENSG00000223496.2	8.54371	4.47582	6.35382	5.98278	8.47786	6.08714	8.04852	8.10702	4.54755	4.12191	7.69071	10.364	7.12708	6.50762	5.43784	6.484	4.59249	7.95043	4.8495	5.64724	9.8528	5.22917	8.28432	7.94246	8.4533	4.32734	7.54687	7.11716	10.4954	9.12786	8.28379	5.56842	5.72822	8.62454	7.76841	4.49644	9.10843	6.11157	6.71691	4.07502	5.99992	4.4687	7.42207	8.43859	4.36759	6.00707	4.47897	4.50252	8.15253
ENSG00000162946.19	0.235006	0.58383	0.217893	0.732282	0.701922	0.187184	0.181489	0.533496	0.177107	0.404196	0.569989	1.39365	0.519934	0.374182	0.171609	0.582339	0.109191	0.230483	0.372359	0.322374	1.51028	0.379611	0.585339	0.334986	0.092817	0.200769	0.0891347	0.44357	0.161259	0.472331	0.293792	0.293876	0.644364	0.0695329	0.234798	0.37656	0.315111	0.28606	0.487209	0.252077	0.0929798	0.595677	0.279035	0.204627	0.107253	0.199744	0.337046	0.228199	0.283578
ENSG00000124831.17	10.1323	12.2031	13.6423	11.627	11.1174	13.9178	12.2518	14.3215	10.9976	15.5367	15.3842	12.3578	8.887	9.94163	9.58654	5.50174	3.59318	14.5992	5.24137	17.1303	8.38164	9.40229	10.6387	8.93897	10.507	13.9311	8.39213	10.3882	9.10071	8.97139	10.9784	12.0003	15.5133	7.2999	9.32275	16.8258	9.88773	10.9249	14.5771	6.49683	10.0654	12.5138	7.11298	3.95989	19.581	10.814	10.7044	9.47147	10.0517
ENSG00000161217.10	5.95797	6.81006	8.751	6.77271	7.27196	7.85858	6.3825	11.7018	9.31726	8.74948	12.5005	7.4969	4.94953	8.46135	7.8311	6.28715	3.81294	8.29959	6.61397	9.1915	6.82594	7.49424	4.93077	7.67339	5.33032	8.5629	5.69363	10.1436	7.93606	7.67706	4.72016	9.02983	8.17849	5.23851	7.6222	10.1257	10.5835	8.7293	8.44934	5.37534	12.7674	11.008	8.75363	3.28171	9.231	13.5318	8.93978	9.73759	9.22076
ENSG00000134830.5	0.14631	0.309924	0.172964	0.114986	0.469869	0.208586	0.138491	0.105655	0.169386	0.0607743	0.413088	0.212392	0.0910629	0.0948663	0.129831	0.09608	0.114304	0.141985	0.127172	0.0590814	0.205034	0.133383	0.0363473	0.144069	0.0240149	0.233566	0.0446296	0.136092	0.133211	0.344689	0.1819	0.252246	0.255894	0.169625	0.119799	0.340934	0.26659	0.169957	0.241642	0.304364	0.0726428	0.593037	0.288174	0.421726	0.0565278	0.0781126	0.150472	0.118315	0.261342
ENSG00000134824.12	0.563047	2.22996	0.486668	8.28766	2.19414	11.9444	2.12434	1.74302	0.928659	6.82176	1.66528	7.2916	1.05098	12.5505	0.638204	1.95969	4.68044	2.43504	3.87034	0.58745	2.06896	0.562278	1.51479	1.11096	0.656795	12.0314	9.4682	4.89265	0.327431	1.46231	1.41355	8.64873	13.5871	3.13153	15.0604	27.0714	3.18543	22.8009	2.55847	0.766383	1.01578	4.91844	1.7819	0.821792	0.276654	1.27074	1.61674	1.58712	2.66493
ENSG00000011405.12	5.83371	8.75123	6.30709	9.06786	5.41336	7.00136	8.11317	9.66455	6.05309	5.16723	5.68166	5.54081	3.92291	6.81185	5.4051	2.10798	0.828901	8.06499	2.01542	5.86622	4.56019	5.38211	4.86494	4.24629	4.44579	7.53737	4.24085	6.01866	8.55101	3.1979	6.53282	6.46815	5.59458	2.98072	4.89707	9.02013	7.32024	8.78407	6.20462	2.76805	11.9692	7.36215	2.58534	1.35056	4.42542	8.98407	10.5754	6.75688	7.20009
ENSG00000154642.9	1.46314	1.30557	1.57858	0.993091	2.6207	1.39915	2.19685	1.72895	1.09086	1.20605	1.95596	5.26747	2.48774	4.05961	1.46134	0.694415	0.218223	1.71316	0.53953	0.822739	2.02909	1.65399	0.920823	0.744246	1.60686	1.84431	0.850761	1.87343	2.1004	1.53307	1.76357	2.59977	2.09373	0.466053	2.40966	2.79438	2.54409	1.75244	1.68899	3.74734	2.65672	2.32676	1.14785	0.387049	0.826356	1.37608	1.94524	1.48847	2.06284
ENSG00000174951.9	2.25331	2.00889	2.24646	1.85344	2.11513	1.01538	1.68247	0.97685	1.00554	2.76942	1.04235	2.07351	6.84588	3.09141	1.76874	0.695972	1.40981	2.53955	2.2352	2.03573	1.91909	0.988812	2.75147	1.40693	1.56717	0.635814	0.952831	1.43594	3.5142	2.62451	1.73233	4.89675	0.885058	2.46972	1.43653	0.756844	2.18496	0.93165	2.74603	0.700449	1.50614	2.21999	2.72902	1.06939	0.10624	2.51476	1.77537	2.23942	1.06542
ENSG00000198597.7	0	0.111242	0.019948	0.0377582	0.0613078	0.00444282	0.0265483	0.0993819	0.109807	0.0114037	0.192165	1.22748	0	0.0192937	0.0259856	0.0520573	0.0112603	0.00223794	0.0779508	0.0328669	0	0.00700784	0.00636554	0.026715	0.00946295	0.0153392	0.00370233	0.0790284	0	0.00417917	0.00693647	0.0313882	0.235279	0.0148533	0.00590077	0.0981289	0.122387	0.0669705	0.0287868	0.0146857	0.019083	0.00628744	0.147884	0.010551	0.0356392	0.0455998	0.0296463	0.0376938	0.0817786
ENSG00000124243.16	2.19047	0.589038	0.908196	0.850934	0.382399	1.16054	1.40007	0.26292	0.166644	0.267383	1.78581	3.68651	0.296105	2.93992	2.37355	0.474014	1.76867	0.606242	1.47028	0.688953	0.656844	2.66809	1.20272	0.29647	5.82339	1.09993	0.444578	1.76206	3.4223	0.428107	0.168429	1.05095	0.570658	2.90221	0.654837	0.436125	3.26196	1.69173	0.451152	1.00849	0.772624	1.73423	0.919758	1.62125	0.317756	0.513828	1.307	3.7258	1.39276
ENSG00000165828.12	188.344	23.4284	123.518	50.0081	10.6402	14.6068	84.5272	45.4246	39.2914	64.0631	16.1197	19.7285	1.13503	232.407	101.832	8.81589	200.49	51.2689	193.918	85.5533	0.381933	124.345	22.8797	98.3425	105.75	98.1111	423.315	0.247231	96.03	6.4917	3.95614	87.6614	4.59617	212.682	8.39063	35.1873	57.3423	31.1227	52.2159	27.3858	32.4444	36.2146	115.104	18.6384	139.631	108.725	43.0964	65.1318	50.2674
ENSG00000170540.13	84.3747	57.0316	65.3431	99.3051	81.4881	105.399	85.5188	145.895	54.3711	83.6106	92.4697	77.049	80.8054	81.5529	83.8648	55.3193	15.2568	96.1516	27.4497	80.7716	61.8372	79.5738	78.1402	65.9388	99.2008	95.2423	157.381	71.2076	102.137	85.6796	77.691	68.3992	50.3478	72.0609	103.325	74.9467	84.6889	65.2352	86.4012	108.727	89.1176	52.007	43.0112	55.4445	37.1496	81.044	52.8832	64.1758	58.509
ENSG00000265112.1	0.866899	0.25454	1.39977	2.38457	0.258121	0.233817	0.931456	0.282717	0.226625	0.720186	0	0.88091	1.25896	0.761543	1.53852	0	0	3.53336	0	2.88287	0.809895	0.368809	0.670012	1.40596	0	1.61455	0.584539	0.891237	4.31642	0.439883	1.21684	0.550634	0	0	0	0.245921	1.71759	2.27389	0.233076	0	2.29555	2.64716	0	0.555281	0.312603	1.67988	1.04015	0.417631	0.637607
ENSG00000141480.16	5.19214	9.29038	8.59806	22.9734	8.09939	11.3626	18.2971	5.53588	11.2299	8.59534	14.148	18.0311	17.686	13.8786	11.0294	17.9098	16.083	8.16012	15.9383	5.34214	14.0281	7.9687	7.55249	9.40083	15.2315	8.77746	8.53322	12.3558	12.6326	3.9024	9.87313	9.31543	9.46647	12.5697	14.1769	10.9314	11.3557	10.0736	8.9747	7.77946	10.8659	19.0364	12.147	5.79057	4.2097	12.5669	9.88706	17.166	12.0485
ENSG00000129084.16	31.2682	16.8193	24.2705	32.5101	15.735	23.2155	37.9699	19.6643	19.7599	18.8025	17.3492	15.5002	22.3295	29.114	22.9989	23.1886	12.4097	29.0818	12.7239	21.0543	19.7061	25.3226	20.9794	21.8982	29.6497	22.2651	34.9605	18.0545	27.8997	11.8122	21.4313	20.1207	16.4339	34.655	25.9508	21.7782	25.1893	16.4147	32.1393	46.4233	27.7634	19.8041	19.209	21.9182	11.2753	20.4834	21.9574	22.7406	23.0375
ENSG00000204310.9	15.7729	16.2909	15.4501	13.6603	24.4594	15.0543	17.4173	26.2603	17.7388	22.5801	16.5033	28.6074	14.9266	22.9481	10.2536	12.4529	17.2239	16.6878	17.5233	16.3543	20.8782	12.9182	10.4102	15.2723	9.3124	13.8034	10.6003	23.3273	14.5088	17.8415	25.2929	25.5791	20.1735	16.0763	14.5593	17.8718	17.7702	22.0505	18.849	10.0536	20.2245	20.5151	20.8027	11.6623	15.7359	26.2417	19.3041	18.2641	20.3462
ENSG00000167447.11	7.16162	3.1264	5.72834	4.75981	5.84996	4.95166	4.60746	4.85653	4.68544	4.15527	6.41755	5.33931	3.6113	7.9556	3.59033	3.54899	2.22764	5.75043	4.61098	3.45268	7.37216	3.25637	2.81148	5.63845	5.31147	4.91987	3.30875	4.44099	6.99213	2.77835	4.22315	6.48638	4.56823	4.04323	5.22598	5.23486	7.45598	6.83815	5.03275	5.73177	5.70675	5.8577	4.03365	2.91256	2.84209	4.58922	6.38784	5.41251	5.60183
ENSG00000198677.9	13.83	9.81711	9.89368	11.0469	6.03694	8.17435	9.9297	15.714	10.4445	14.3722	9.07393	8.05781	2.09863	8.82318	11.4209	6.96583	2.41407	10.2976	5.07173	8.18561	5.80238	13.1591	6.77596	6.69621	8.3404	14.2972	7.00542	6.054	4.74319	5.80372	10.9621	9.05606	6.27077	3.13685	4.31441	10.636	9.96227	7.9957	10.0214	5.97316	15.8937	10.7523	8.39371	3.12857	4.62175	17.3148	13.0405	13.6314	9.32346
ENSG00000164104.10	67.1579	74.674	59.3448	80.7504	64.6571	84.9278	100.94	43.1243	43.4347	95.2262	30.4327	93.3974	79.3793	51.3599	90.2027	53.1513	18.1066	107.688	28.886	35.3613	67.1652	75.426	103.378	103.698	130.905	52.3642	94.6553	61.6694	74.7024	30.7671	157.881	59.5518	32.39	46.629	90.4711	60.0895	58.4052	67.3604	106.395	29.0045	61.9394	68.399	30.3737	44.647	14.9644	62.7587	42.9321	63.5305	36.024
ENSG00000130811.9	55.5172	36.1988	41.703	59.2273	58.8621	34.0297	49.3416	40.2703	38.778	94.913	56.6128	49.3209	40.0473	64.049	34.7752	67.774	114.542	60.2018	71.2169	42.9756	54.8106	52.0625	72.7074	59.2545	65.1642	33.984	54.2423	40.9111	49.9499	39.1682	36.1076	30.0239	36.7797	83.6844	37.4823	35.2027	46.6115	40.0695	38.3625	49.496	38.2434	40.1597	62.8031	76.6393	22.0285	36.6006	57.8178	58.1788	46.4785
ENSG00000115761.14	18.1494	7.778	11.8263	18.5018	11.4741	12.7252	11.4782	14.6045	10.7398	11.7575	15.4662	12.9647	13.2081	12.5252	12.2544	9.36767	6.91291	19.6238	5.88142	10.6576	9.89918	12.7249	9.52559	14.4488	15.1574	11.6873	9.87306	12.1038	18.9931	10.6589	11.3089	11.8961	8.06672	15.0415	13.7712	11.148	11.8873	11.522	14.834	8.68438	13.8198	10.1088	6.84254	6.76328	4.48452	13.9973	15.2607	14.2168	12.0387
ENSG00000168246.5	9.0876	10.2749	8.07569	8.76677	9.99625	11.5816	13.7287	11.1736	10.3472	11.2469	12.9099	9.39495	8.79577	9.09929	7.7753	6.95409	2.01676	10.4215	5.59036	6.20887	8.22849	7.65907	9.0209	8.62657	9.55057	7.92398	9.02692	8.32434	5.12101	7.94402	6.77097	10.3613	7.99726	7.28829	10.7614	11.8818	9.86665	10.721	8.09418	10.3547	12.4169	10.1377	6.62856	6.30373	8.09927	7.92866	11.5756	8.22168	9.93091
ENSG00000181523.11	4.14746	6.21848	2.05607	2.99045	4.10202	3.02747	4.10361	4.49636	5.54481	2.96757	4.47632	4.91033	5.37474	6.17984	5.24121	7.11291	8.06396	3.73481	6.35697	4.96877	7.66209	3.35625	6.15047	7.95583	13.2089	3.96973	3.51536	4.86992	4.85918	5.08307	4.28971	8.73714	4.20981	6.15563	4.44202	4.83335	5.96897	6.32455	4.80297	1.98257	5.60456	8.31558	4.92317	3.58811	5.61317	6.07975	10.0222	5.89468	5.34287
ENSG00000165807.6	2.05313	0.600594	0.185549	0.52682	0.937513	0.5331	0.551506	3.23046	0.925259	0.916473	1.35005	0.529363	1.4519	0.450901	0.593698	1.00365	0.392771	0.680701	1.18083	1.85723	2.03979	3.17774	1.56314	0.810711	0.528126	1.19851	2.95993	0.921493	1.64786	2.93881	1.13556	0.69341	1.03953	0.649353	0.0823303	1.40174	0.421207	0.409932	0.67971	7.81358	1.70403	0.520503	0.88429	0.368033	3.14928	0.623505	1.35674	0.177152	1.44528
ENSG00000157211.10	0	0.0133668	0	0	0.0271097	0	0.00815236	0.00742326	0.0119009	0.0126065	0.0187442	0.00770996	0	0.0199957	0.0134655	0	0.0155599	0.01237	0	0	0.0106326	0.00968374	0.00879618	0.018458	0	0.00605613	0.00511604	0.0156007	0.00453341	0	0	0	0.0464455	0	0.0163079	0	0.0112746	0.0298525	0.0122397	0.0270578	0.00753422	0.0115843	0.0145966	0	0	0.00630118	0.00546221	0.0164485	0
ENSG00000122008.14	2.69613	1.74223	1.25433	2.26209	2.09218	1.57722	2.13353	2.95355	1.53891	1.65177	2.03806	1.81942	1.87648	1.9821	1.59805	0.924138	0.213481	2.0387	0.517249	1.52145	1.68125	2.0693	0.856849	1.23456	1.06149	2.017	1.00901	1.44344	1.14756	1.26771	1.82138	1.50507	1.88514	0.530349	2.80798	2.72417	1.93552	1.39051	1.63099	1.69374	1.8994	2.62841	0.79605	0.640113	0.813627	2.1332	1.98969	1.56466	1.49013
ENSG00000179168.13	0.0193668	0.204714	0.0938135	0.0665898	0.164345	0.148871	0.20809	0.170532	0.121509	0.0563121	0.151508	0.787191	0.0949239	0.127598	0.148941	0.116846	0.278019	0.0710426	0.19639	0.15457	0.0271399	0.0370768	0.179619	0.153122	0.066755	0.162313	0.0587645	0.278747	0.237218	0.280073	0.10602	0.18452	0.32602	0.122244	0.0416261	0.1813	0.122309	0.152398	0.124968	0.0690653	0.0576936	0.214377	0.167661	0.0558231	0.188558	0.0723773	0.230049	0.097965	0.181615
ENSG00000118515.10	1.14303	10.1959	6.05092	1.57857	9.03236	2.7708	4.07938	7.53117	11.2742	3.13243	8.21751	3.91584	5.79354	1.77907	1.91073	2.16657	1.35199	3.01759	3.02038	0.97946	4.98152	3.15377	0.915499	2.51531	0.613051	3.03801	1.48549	2.28684	1.63512	2.97097	4.39788	5.56718	3.95818	1.03497	2.73201	6.72452	2.55129	1.87168	9.31893	5.76761	1.66486	5.03819	3.80941	1.45822	20.4975	2.41453	1.99232	2.32201	4.54186
ENSG00000154146.11	1.46625	7.87695	1.40297	2.29045	3.54112	4.54059	2.56738	2.42632	2.31404	3.2633	1.75897	15.6168	6.6247	1.89232	1.89543	8.51869	3.30393	1.25427	3.8181	3.70214	3.12017	1.34	6.94631	6.29728	2.64138	2.45627	3.06366	5.93659	4.53181	2.1769	3.90282	2.656	5.89136	1.59963	4.26034	2.97322	2.07121	2.73492	3.81076	1.00059	0.485327	3.74492	3.90033	3.23497	1.13578	1.87916	1.13376	2.95628	1.87726
ENSG00000165672.6	99.3161	47.7919	36.3204	57.3194	50.0499	53.4173	63.236	62.0109	49.947	40.6894	56.6821	35.1907	51.2323	41.2655	67.1672	62.3389	36.463	62.1527	46.3831	40.9143	43.8855	61.3255	33.2266	48.9986	58.8	45.6255	58.682	61.4644	66.1197	14.8631	57.0011	29.0508	37.511	56.2519	98.0733	67.5134	38.2556	39.3381	48.9076	96.1615	83.5888	38.1472	37.7808	66.8138	18.6944	25.7947	41.5904	56.6102	38.092
ENSG00000158623.13	17.7872	10.2521	11.883	21.8337	13.8225	9.90382	10.8938	11.7174	13.0384	9.42639	9.52769	11.6581	10.1826	10.2393	6.35348	6.87839	4.37918	18.569	9.35823	8.77844	11.4082	17.1853	19.3468	13.9828	16.0034	13.2425	8.809	12.5452	14.9583	6.86724	9.6623	12.2998	4.69013	11.0782	16.9499	10.4896	12.4245	13.0958	6.66781	6.05331	19.4136	13.1679	14.0643	6.34756	3.66635	20.4821	7.95843	15.0627	14.8805
ENSG00000140995.15	5.59085	4.97248	6.45151	4.99881	5.09723	4.63482	6.41828	7.75822	6.59544	5.3523	6.52107	12.4994	6.29395	8.36108	6.17714	4.98365	10.0148	9.12383	9.04769	6.15744	7.33408	4.68031	8.06749	6.67761	6.8508	6.20552	7.33525	6.05209	7.96204	7.06024	3.72374	8.12598	6.5031	11.0852	4.65076	7.19384	7.85199	10.2417	6.31154	5.54762	4.39764	10.3905	8.55459	8.9887	3.07289	4.72406	4.55759	7.29516	7.58971
ENSG00000112319.16	0.0079266	0.114044	0.00639947	0.0363393	0.0259617	0.0812416	0.0425844	0.0258506	0.0600931	0.00878015	0.0522195	0.0966565	0.00575574	0.0116054	0.0109415	0.0182186	0.0325114	0.0624615	0	0.0131799	0.0925671	0.0236057	0.00612633	0.00642778	0.00910735	0.0337436	0.0106896	0.085566	0.00157871	0.0241328	0.467307	0.00755218	0.0323482	0.0190602	0.0596298	0.107933	0.0431888	0.0540581	0.0319674	0.108359	0.0131185	0.0988357	0.00508309	0.0101546	0.0114333	0	0.0304344	0.022912	0.113686
ENSG00000089327.13	25.6586	49.7295	45.5116	45.6879	70.3432	30.4795	29.007	19.2093	11.7783	84.3308	67.7761	63.9806	68.3807	45.157	46.9564	43.2616	62.3779	7.26678	78.9973	98.1281	42.4252	40.9428	138.087	23.1213	69.6404	29.9466	38.5315	35.446	9.18155	9.87026	6.76098	45.8836	36.856	43.1327	59.5993	32.1179	26.1462	30.5947	25.5936	44.7917	24.1032	48.5011	50.8397	103.069	18.602	6.79184	31.0792	52.3241	24.395
ENSG00000198517.8	4.30001	12.838	24.1251	10.4683	7.78647	9.41447	6.08797	5.95952	13.5602	9.35682	5.86956	8.44736	10.0155	10.4171	4.46186	11.5171	16.4704	7.21847	15.0487	13.1348	8.81165	5.14215	12.8849	15.6007	6.29019	15.7017	7.38301	9.336	9.67357	18.8201	7.15792	18.0385	10.3142	9.90201	4.74109	11.8831	16.0691	15.4379	16.9086	2.03766	7.81145	11.3898	20.0419	6.41426	12.7362	20.5217	13.3927	13.4778	9.69912
ENSG00000185022.10	3.47727	12.0067	7.80367	3.40691	3.64136	8.97358	2.72962	2.84883	8.35007	5.72147	4.59408	5.09009	4.99168	5.13066	2.32171	4.78659	3.91173	4.2897	3.83427	5.63307	7.51046	4.25493	9.14378	6.57033	5.7165	6.06977	8.83239	1.90676	3.0232	5.62737	7.91496	8.22626	11.1596	4.17816	3.90475	4.79806	5.5528	5.34305	7.44747	4.20626	3.34817	4.73889	6.24309	8.73359	16.1653	5.08524	6.21579	5.76354	5.18648
ENSG00000126785.11	0.9683	5.17268	0.930533	2.63771	2.05911	1.60238	2.60438	2.27978	1.5629	0.825186	1.80054	5.47203	1.16354	1.86588	0.931305	1.01227	2.16513	1.31895	1.41902	0.442501	2.40748	1.24382	0.492484	1.13222	0.287107	1.91975	0.454933	5.18937	0.821177	0.960483	1.20484	3.52359	8.15815	0.608379	2.4639	4.46586	2.59925	2.45302	2.21708	1.4815	0.68237	5.47485	1.34604	0.48018	0.642019	1.05319	1.65503	2.20751	2.57766
ENSG00000100429.16	1.48364	0.792566	2.41107	2.09318	0.914866	0.731912	1.28045	1.19871	2.19201	1.68582	2.17158	2.65536	1.49087	1.00483	2.04418	2.72252	4.9958	1.87266	1.82482	1.6043	2.66933	1.66757	3.91722	3.98772	4.42659	1.87185	1.24244	1.35309	3.29711	4.21829	1.36642	1.60052	0.771487	2.47715	0.745787	1.35224	2.27223	3.64557	1.35496	0.366952	0.793658	2.56848	2.83584	1.72899	1.07173	1.31164	1.83988	2.96737	2.23877
ENSG00000105613.8	0.0689132	0.153355	0.0571005	0.404059	0.20087	0.205436	0.109119	0.244852	0.0512015	0.114501	0.188168	3.48292	0.158021	0.602193	0.0429133	0.212577	0.833077	0.118265	0.14712	0.0651326	0.284635	0.0462916	1.58944	0.216177	0.279208	0.0550057	0.0391303	0.221866	0.255721	0.364404	0.0946951	0.0829364	0.395946	0.294349	0.315727	0.169769	0.231755	0.254016	0.0877647	0.0517382	0.0684307	0.215971	0.0767544	0.0975758	0.0274658	0.102414	0.122723	0.301413	0.120045
ENSG00000116120.9	36.2075	17.1551	23.0652	42.5525	17.566	31.7843	21.4772	20.1551	22.0142	19.1826	31.3801	16.3452	21.7486	13.8894	22.543	30.0677	14.4959	34.7327	15.4055	32.4807	19.1211	29.5781	23.9072	23.8174	42.102	27.8619	32.0402	19.3279	44.2511	25.2996	27.7515	13.3486	14.8895	36.2894	29.8034	19.7405	25.3341	20.6383	31.2751	37.9993	25.7782	20.344	19.2272	17.7591	9.09231	23.2942	23.7776	22.8712	21.6181
ENSG00000196357.10	0.737292	0.528012	0.892869	0.939832	1.16726	0.679034	0.785757	0.862099	0.747468	1.19515	0.987234	0.700479	0.659419	0.831988	1.64538	0.785302	0.737572	1.20692	0.850991	0.914962	0.840012	0.665591	1.50799	0.867655	0.943539	0.794234	0.638611	0.576197	1.26787	0.930732	0.615902	1.30213	0.507593	0.648616	0.676398	0.908034	1.10896	1.10375	0.672046	1.51773	1.06546	0.832833	1.03786	1.15186	0.317743	0.657114	0.958003	0.762365	1.03166
ENSG00000131148.7	10.124	7.50075	11.3111	11.768	9.36437	8.11074	8.9847	13.2778	8.3604	9.23305	10.5983	8.56301	7.75995	9.62866	9.32881	11.7022	19.9281	13.3303	14.6525	9.10072	10.2895	9.54427	8.48504	13.1961	11.7471	8.33012	15.5602	10.9746	12.8164	10.3699	7.58843	8.01192	6.04823	17.4184	8.39749	8.54563	10.2103	12.8309	10.6517	11.2115	7.9699	8.17849	21.3925	14.0302	4.45605	10.7765	6.58837	9.07457	8.09417
ENSG00000128463.11	21.2774	12.2922	13.3791	10.5317	14.1407	11.5064	17.98	16.4032	11.5901	15.7693	10.9882	17.8413	13.0693	22.5521	13.895	19.2276	22.1118	19.2334	17.6535	13.3439	14.5438	20.0078	13.3132	15.4873	13.6949	11.9189	24.0754	13.6198	30.6621	8.76077	10.692	13.9739	11.7486	22.2625	10.1596	12.4955	13.586	10.613	16.129	16.3355	13.8042	9.79294	18.9947	22.9248	8.42185	10.3181	9.74389	9.37746	10.5705
ENSG00000137494.12	1.11358	1.62037	1.76251	2.56874	1.07655	1.88194	0.851942	1.33084	1.6306	1.53113	1.72956	2.29538	2.07652	1.49832	0.869326	0.735034	0.614287	1.22949	0.871939	1.8141	1.29386	1.20088	1.43807	1.36738	0.866468	1.45422	0.822157	1.62126	2.01503	2.77341	1.29104	1.23221	1.58553	1.0232	2.10565	2.14731	2.05535	1.68878	1.7907	0.955102	1.43472	1.72173	1.19319	0.731346	1.12842	1.55696	1.49427	1.56612	1.94004
ENSG00000253405.1	0	0.598105	0.653601	0.0239449	0.155517	0.140874	0.0374134	0.0170337	0.204812	2.1117	0.372762	0.654588	0	0.122354	0.123594	0.210082	0.285635	0.0141923	0.847436	1.47638	0.048796	0.799944	0.121104	0.508253	0.0400072	0.0138966	0.176092	0.017899	0.655359	0.742081	0.219944	0.0663512	0.0888129	0	0	0.414867	0	0.219202	0.393198	0.0310439	0	0.0664546	1.87566	0.167278	0.169509	0.159048	0.26321	0.327109	0.0192078
ENSG00000115107.18	11.7645	11.2414	7.45371	15.9088	6.90838	14.8946	7.53972	15.4688	9.96377	12.2072	13.2294	18.7633	3.24165	7.09059	12.0603	11.5501	15.3493	12.2702	15.5905	15.3745	12.2574	7.18603	8.70119	17.0267	12.222	14.0253	10.4648	3.39082	7.08203	5.60586	3.62204	8.28908	7.98587	18.5938	8.64641	13.3494	10.9599	15.9034	10.6537	4.59368	13.9515	10.0596	19.8648	11.3084	4.41646	7.8421	13.4875	8.35125	9.37486
ENSG00000107281.8	15.9815	32.1893	21.5974	61.4632	32.8508	30.9556	33.4596	53.5145	44.1056	31.9694	36.3305	50.6109	45.0262	45.8595	21.1212	58.7096	52.109	20.7624	13.6603	67.1096	61.8011	19.7896	102.676	65.5318	38.1865	46.8721	32.8246	72.2315	18.2495	244.164	46.3361	17.9404	39.367	21.2962	45.3286	28.9626	37.5456	22.6993	29.6494	24.3285	33.3984	41.8088	31.0952	51.2891	45.2917	26.6383	33.7867	22.428	17.0968
ENSG00000212123.3	2.07301	0.635647	1.30288	1.13683	1.37121	0.318489	3.48204	1.23231	1.24506	1.08998	0.994001	1.74654	3.65838	0.956637	1.62219	1.33439	1.93729	1.24065	1.54335	2.29065	1.65477	1.87549	1.71881	2.39387	2.74359	1.4452	0.911225	1.28142	6.099	3.93459	3.91169	0.412518	0.77638	0.970128	1.79071	0.569457	0.867593	0.526545	1.95779	0.257341	0.977133	0.78125	1.46397	0.705939	0.652901	1.91774	0.680073	1.64023	1.31723
ENSG00000166340.13	17.1345	36.0932	25.6623	58.1031	46.0459	47.4768	42.291	37.7709	37.7657	23.1594	28.7375	43.2582	69.3798	44.6423	20.1069	35.7288	23.2012	21.6528	25.9257	33.9134	60.3949	34.315	22.5828	21.624	34.3353	32.1074	13.0238	52.4861	58.0007	21.9396	22.4075	42.121	45.548	40.0474	49.5838	42.9149	47.9162	42.1197	34.5003	17.5175	48.1149	49.2547	34.0145	14.038	64.7244	28.0182	72.7901	43.7942	54.4654
ENSG00000215375.5	1.61821	1.09574	1.7997	1.83195	0.540824	1.14904	2.50163	1.85247	2.49935	1.2849	1.1694	1.71708	0.665452	0.89451	2.24673	4.07037	2.93481	2.07739	2.94703	1.9933	4.84394	1.87566	3.45215	6.37369	11.8322	2.2362	2.85404	0.809187	5.34742	1.23167	0.973474	1.31103	1.30842	2.68012	1.07064	1.11952	1.04691	2.23924	2.25973	1.43289	1.64514	1.72696	2.22367	2.30574	1.39332	2.19413	1.1729	1.87735	3.09695
ENSG00000072415.7	4.81873	4.15871	2.51079	4.26793	5.66732	4.98678	4.29523	7.0161	4.9333	4.24413	4.32078	2.71544	3.7401	3.53075	3.96014	2.99466	0.755889	6.34283	2.53943	2.65245	3.13333	4.59014	3.64157	3.09221	3.32254	5.26967	2.75031	4.14042	4.64911	3.50679	4.314	2.37302	3.43696	2.71266	6.16013	5.46403	3.17149	5.51294	3.51291	3.31994	7.77494	3.88138	2.24198	2.46336	5.65561	4.27874	5.9177	2.63414	4.48505
ENSG00000095574.10	4.85527	2.86815	3.37899	3.92337	4.53432	3.83149	5.03107	6.28201	3.66845	3.19972	5.48522	3.39652	5.58649	6.94412	3.14785	2.45871	1.06366	4.48246	1.32463	2.30933	4.79174	5.09964	4.37612	2.64038	3.91765	3.55726	2.45781	5.48778	3.9541	2.79995	4.5583	3.03362	2.94469	1.54164	4.88754	4.68375	4.06057	3.72238	3.26542	5.74589	5.99441	4.78437	2.00486	1.51346	2.66517	4.33535	5.74609	3.56062	6.49043
ENSG00000030582.15	89.3553	105.31	132.389	152.021	231.929	169.714	111.133	151.393	157.784	85.5295	139.771	102.36	101.879	131.664	73.6721	164.939	361.719	57.8208	203.258	114.417	319.784	85.1425	129.252	137.47	192.144	95.0554	78.4164	102.83	84.1708	89.4998	55.0214	128.067	130.05	260.732	347.377	125.416	138.847	150.348	112.675	89.4106	73.4356	120.317	197.169	137.375	395.52	120.99	135	119.213	211.757
ENSG00000163399.14	271.968	338.122	363.237	173.035	238.39	155.277	255.464	294.918	287.372	248.838	146.763	83.6188	161.332	121.479	295.175	257.823	172.404	330.346	312.67	141.326	215.821	365.369	132.147	190.815	183.698	242.489	113.283	84.7065	226.898	154.908	216.85	220.934	88.7788	176.546	182.914	263.557	233.75	257.173	256.732	57.0422	337.428	176.443	170.067	135.025	202.074	429.734	97.7016	350.023	210.312
ENSG00000130734.8	9.43441	6.707	7.89811	10.6723	8.28796	7.27194	7.82347	13.9728	11.9184	19.5382	12.7629	7.77944	10.038	11.6413	5.78427	21.1044	22.8036	9.17452	18.8598	12.0481	12.9587	7.48756	14.29	14.4617	11.1505	7.87915	9.18104	6.24518	8.32814	10.2448	8.50636	6.08501	5.88984	11.9682	7.33314	7.26772	7.99117	9.39661	9.22051	3.15304	7.81902	7.97248	17.6297	11.5532	16.2938	17.4326	8.76887	11.6733	10.0299
ENSG00000149089.11	9.77201	3.75053	2.84963	6.79015	5.38566	3.20448	3.88313	38.7249	5.94373	3.54826	3.37825	3.49646	2.60167	3.59211	7.36732	1.98988	0.81035	5.3528	1.54876	3.94656	5.48762	5.77987	2.42432	4.17995	3.13211	5.3476	3.53557	2.23202	3.52553	6.15705	3.45878	2.78763	1.95682	8.07098	5.2485	5.72432	15.3721	2.77749	3.71716	8.04323	7.41988	8.33441	1.6741	2.52535	2.60801	3.61346	5.27065	3.72167	3.59041
ENSG00000171793.12	10.8498	8.21212	14.7101	11.4796	6.75821	7.50492	5.86387	4.59667	10.9622	9.41727	6.99841	12.6166	7.17277	4.4131	11.8362	7.25387	5.84512	13.0103	10.3821	6.41842	7.36215	7.99522	4.79803	12.9494	7.45171	10.4747	9.23776	6.64316	13.5124	3.83025	17.1758	9.52308	12.4592	9.185	11.2079	11.7515	7.28773	17.9085	12.3449	3.4964	9.83046	9.86911	8.6797	7.65275	1.8256	14.4365	8.13886	11.2606	8.22258
ENSG00000095303.13	0.298748	4.72601	1.87832	2.45403	4.03578	2.1491	2.74385	7.89177	4.35215	1.23414	2.83423	6.5165	1.37736	1.26906	0.956297	3.88707	2.26603	2.19845	3.05438	0.494021	4.46183	1.81245	0.389046	1.27933	0.192784	3.12608	0.626402	4.00539	0.242077	3.54475	2.97448	1.95736	11.7952	0.575677	1.91755	4.50328	3.08929	4.38613	3.05003	2.13078	1.6052	6.22022	3.00752	1.3133	1.29274	1.82851	4.36037	2.11448	3.53525
ENSG00000266094.5	1.61316	4.9091	1.86299	1.70439	3.81393	2.42328	2.246	1.68976	2.83469	1.47032	3.0791	13.8882	0.930883	0.747656	1.15023	1.78632	0.628052	0.978266	2.34	0.518691	5.38956	1.00444	0.825683	1.06556	0.437791	2.092	0.910044	1.92204	1.39578	0.764342	1.29563	2.53785	3.48418	0.8991	4.80287	4.19432	1.52135	1.80742	2.07667	1.00325	0.353612	6.72831	1.79491	0.314776	1.35602	0.703863	1.84839	1.58774	3.05657
ENSG00000113312.9	31.1657	19.8169	21.973	24.4166	38.0287	23.6645	29.9396	29.1041	21.1435	36.7496	33.4575	23.4943	38.5	37.281	22.5237	23.2683	21.7142	29.442	17.9531	24.7983	30.7384	30.8821	26.0388	27.3498	30.4138	19.977	28.2366	16.7054	15.2171	31.8455	19.0501	21.0965	22.9025	25.3355	24.6238	23.1206	25.009	16.6447	27.7315	69.3932	22.1331	23.4186	19.5701	23.6358	14.351	29.4773	23.1672	26.2763	26.2228
ENSG00000211448.10	0.237142	1.52629	2.53103	1.88298	2.18042	0.74195	0.801777	1.54676	1.84494	0.977162	4.7597	0.607257	0.134313	1.38048	0.91281	0.572302	0.674372	0.935627	0.769523	0.596193	4.6791	0.649722	1.12536	1.90763	0.199809	2.18055	0.334728	8.85481	0.153027	0.659414	1.52055	2.28953	1.32907	0.952282	2.9155	2.88194	1.2592	4.4786	0.803356	4.52726	0.759822	4.85655	0.851604	0.382784	0.109457	0.493671	4.06772	2.62533	4.46163
ENSG00000120306.8	31.2647	45.6421	43.798	30.2325	26.1643	78.9823	54.1589	55.1295	47.0323	108.471	33.176	26.2491	78.8909	42.336	34.7714	42.005	62.0264	27.7845	57.4041	127.902	24.4521	50.9483	74.3274	33.0697	49.7026	35.351	110.153	19.8563	21.2335	56.9368	35.2271	39.9652	61.2393	56.8534	70.0077	29.3207	30.3681	21.6582	31.5155	62.883	21.9894	27.5432	59.6049	80.6883	192.022	55.091	28.8238	41.8786	30.1858
ENSG00000130559.17	3.41089	4.40536	4.02105	4.40077	4.40119	4.69453	3.16112	4.53087	4.89849	4.56479	4.29225	6.47509	4.06453	3.71413	3.40789	3.33688	1.83871	5.21	2.6692	3.46852	2.90098	3.10402	3.3313	4.35568	4.00088	5.89809	3.19659	3.8435	3.65332	4.9168	5.1126	2.89972	5.27864	1.86419	4.47298	5.10554	3.178	7.42427	4.73493	1.63781	6.19136	5.13448	3.75568	1.82828	2.55979	4.2035	5.84868	4.99896	3.59368
ENSG00000142856.15	4.90486	2.51202	2.9121	2.39388	2.96609	3.56838	3.75904	4.74783	1.75995	2.86676	3.67806	3.01694	2.00929	2.79116	3.34841	2.04268	0.560799	4.18583	0.651437	1.74947	2.7494	4.12723	3.27089	2.22806	4.16926	2.34554	4.80288	1.6578	2.41713	2.21352	4.81815	1.42677	0.983115	2.36405	1.87989	2.24595	2.56388	2.58221	3.46254	12.2983	2.39216	3.22413	0.9102	1.45132	0.760693	2.90186	1.51555	2.4403	1.98734
ENSG00000261652.2	1.23676	1.43606	1.25946	0.927803	2.13417	1.2964	1.38927	3.30005	2.07216	1.75134	1.57398	1.828	2.35738	3.18529	0.864669	0.581438	0.691725	0.664478	0.228027	2.83226	2.08766	2.36773	2.73727	0.54704	0.775086	1.03204	1.59205	2.60076	0.957292	4.40718	2.55667	1.17834	2.49492	1.06452	2.53742	1.45919	1.06509	0.508725	1.0429	4.1098	0.697786	0.665193	0.486674	2.75467	4.40908	0.583588	0.688006	1.01559	1.92265
ENSG00000172239.12	23.828	14.1016	10.62	18.5386	18.6629	15.119	20.0615	14.097	14.4293	13.7174	25.8021	14.2012	23.7462	26.6961	12.4137	8.96179	4.45669	19.1163	7.70948	12.0115	14.6884	19.7364	13.5449	12.9959	14.1223	12.9565	18.4181	19.145	17.8737	12.4667	14.9892	16.8637	12.8039	11.077	18.3908	16.1633	21.9664	12.2455	14.4229	22.7638	18.1934	14.6856	11.0636	10.4735	9.23742	16.8234	17.5263	15.1081	18.4635
ENSG00000204308.7	59.7611	34.8344	30.5709	50.3498	60.4971	32.2751	86.8832	58.9411	37.2928	42.094	38.5616	39.122	44.0151	61.5453	31.9859	48.4396	37.5384	62.407	27.2512	28.5761	43.7199	53.2963	37.6845	45.68	51.6534	27.1979	57.9011	54.4389	43.9638	47.951	53.6006	47.9308	30.9677	52.1647	30.6096	30.3338	39.3205	30.8654	32.2863	76.1086	35.3739	34.0895	38.0779	45.765	37.6668	56.3964	35.6954	36.1354	47.9786
ENSG00000197798.7	4.63308	5.82862	5.37942	7.02453	5.04658	10.1648	3.52174	4.64139	9.94877	8.53737	5.31703	4.39493	3.82501	6.86273	4.92767	10.3655	3.77782	6.6947	7.19726	6.04818	6.18182	5.63014	10.1496	8.04863	2.42093	6.47163	5.8617	6.09962	4.5205	7.54984	3.97464	4.831	5.31143	5.32218	5.69415	6.15556	6.31704	7.19947	5.62533	16.7421	8.35702	6.05317	5.14403	5.82482	10.0974	7.29632	6.15632	5.35591	8.11581
ENSG00000006007.10	14.1978	29.0019	19.8254	26.7074	26.7066	23.4409	19.706	35.3622	25.0386	24.9318	32.9851	25.5449	14.7044	39.5853	16.1729	18.6471	14.5363	42.5855	21.373	19.8816	24.0019	15.7512	31.4704	26.9425	24.0252	22.2197	27.1102	26.1423	25.613	20.1671	17.7826	30.6279	16.6859	27.5306	17.7089	31.4949	27.4963	30.6036	25.4094	55.5019	23.524	21.5871	26.6429	20.5909	33.7658	24.1749	33.7964	21.1554	35.9332
ENSG00000163462.16	0.0575	0.257853	0.151927	0.222868	0.26615	0.164956	0.336993	0.112513	0.163982	0.186733	0.275493	2.63995	0.153725	0.197456	0.173171	0.126151	0.30016	0.0852225	0.169624	0.0990847	0.417543	0.106745	0.133322	0.292482	0.0720712	0.362995	0.0810678	0.384243	0.168657	0.373993	0.127671	0.617565	0.623971	0.188542	0.280882	0.369233	0.198074	0.37843	0.286704	0.167772	0.0778602	0.774158	0.251407	0.0100448	0.039584	0.0824825	0.278475	0.143541	0.530565
ENSG00000155890.3	0	0	0	0	0.00833631	0	0	0	0	0	0	0.00948335	0	0	0	0	0	0	0	0	0.0130783	0	0	0	0	0	0	0.0143918	0	0	0.00785988	0	0	0	0	0	0	0.00734379	0	0	0	0.00712444	0	0	0	0.00775053	0	0	0
ENSG00000180210.13	0.241599	0.335594	0.011253	0.0255601	0.0581025	0.0375941	0.25959	0	0	0	0.0306081	0.0188849	0.0202422	0.0897923	0.120936	0.0320361	0.362071	0.0227243	0.452298	0.22249	0.0390655	0.130457	0.0323182	0.339084	0.0106764	0.0964207	0.00626565	0.0238828	0.521897	0.0282905	0.0469558	0.602026	0.028441	0.351918	0	0.0158161	0.0345202	0.0438727	0.11992	0.480498	0.636677	0.0354685	0.858073	0.0535683	0.100523	0.401289	0.421445	0.107438	0.0307552
ENSG00000119878.5	11.0565	4.23803	4.56031	7.71143	7.95891	5.30046	10.7466	8.78974	4.86169	6.70261	10.0344	8.71554	11.166	13.4842	6.03726	4.68908	2.54258	10.4083	1.6513	5.44604	10.6709	11.8206	8.45245	5.90849	9.25923	5.77516	10.6807	8.22321	7.04299	10.169	6.53779	5.61535	5.27675	5.60651	9.75437	5.33862	7.41746	5.44597	6.44039	26.1654	7.18468	6.63944	2.10037	3.75145	6.04553	7.26901	6.79409	6.08427	7.1658
ENSG00000213145.8	0.839107	1.85625	0.796768	0.472115	2.72559	2.82387	0.471288	2.67745	1.25633	3.232	0.93441	3.97266	5.82644	0.66174	0.575371	0.739666	1.70127	0.411964	0.812226	1.38888	4.20917	2.21493	2.76363	1.91375	0.208158	1.59831	3.37551	1.6371	0.353234	19.0585	2.77861	0.844896	2.01376	0.481498	4.86751	0.803373	0.396739	0.360162	0.399934	3.43446	0.085217	1.3321	1.02727	5.58856	4.03327	0.459299	1.02282	0.468554	0.873149
ENSG00000002822.14	1.69439	3.27952	5.40169	4.07476	3.48959	3.69405	4.03906	3.83495	3.28999	4.72388	3.32228	7.60312	7.7105	2.34066	2.76862	3.59309	6.38506	3.37156	5.70299	4.08378	4.51928	3.86499	6.50476	5.45349	6.23198	4.20121	4.44406	4.84346	6.22319	4.20073	4.67025	4.3778	3.25341	6.98031	2.71202	4.00242	5.51292	4.87682	5.50897	1.46679	3.49849	3.58777	5.15749	3.66532	2.40735	3.56283	4.81554	5.87578	3.86524
ENSG00000156273.14	4.05923	8.70649	5.53304	3.47133	6.51132	8.13182	5.12033	7.09574	5.95763	3.67071	4.3339	4.08116	6.45135	5.22748	3.9617	3.43515	1.44201	3.70445	2.3415	6.10823	5.55938	3.95027	4.09725	2.4725	3.62317	6.36978	2.94206	4.40837	4.8104	4.07119	5.50044	9.03098	6.44392	1.91044	10.5298	7.15474	6.40608	4.91457	5.65417	5.64474	12.8395	7.03681	3.29617	1.6639	8.73272	7.01003	7.05594	4.72172	7.80158
ENSG00000135845.8	6.77525	5.70443	3.86081	6.1623	12.5132	4.29329	8.56132	4.94271	4.80854	13.7852	12.4881	9.16124	5.2803	12.6526	6.9243	7.21548	4.72452	6.72444	4.87465	7.42892	6.85086	9.52127	7.87049	5.36727	6.48187	4.4306	8.57734	5.39661	8.69793	6.87582	4.93081	9.43222	6.94016	6.4447	6.77923	5.37232	5.1047	7.66176	7.18034	15.8005	5.05712	5.85424	5.94134	9.86477	6.2894	3.51013	7.13682	6.28877	5.2634
ENSG00000172995.15	0	0.00827282	0.00284336	0.0064584	0.00209729	0	0.00504554	0	0.00184139	0	0	0.0596468	0	0.00206257	0	0.00404737	0	0	0	0.0023424	0	0	0	0	0	0.00187409	0	0.00120692	0	0	0	0.00223702	0.0455135	0	0	0.011989	0.00348896	0.00739036	0.0037876	0.00837311	0	0.00716962	0.0135509	0	0.00761994	0	0	0.00169668	0.00518071
ENSG00000140416.18	44.4238	36.0838	9.00688	21.2434	24.7918	36.3477	64.7908	16.4499	47.1842	15.9567	25.8029	25.3581	20.747	58.3157	34.355	37.4128	18.8392	28.3349	20.5661	14.6148	57.0919	17.1862	80.3553	25.6197	11.2042	28.0338	9.42887	50.8368	18.6697	44.9292	35.3419	30.7429	84.1012	22.3414	21.1595	31.8899	26.3727	25.1075	22.1339	30.0003	25.5448	21.0994	20.6323	33.4718	23.1772	17.0069	18.8965	20.2275	24.8067
ENSG00000198736.10	19.9383	14.4277	27.0988	24.9895	17.5548	19.6619	17.3745	11.7365	23.7266	20.0775	12.5381	20.5619	20.3168	34.7986	25.6502	29.5788	45.4397	24.8946	38.7662	24.6478	21.1981	21.4655	12.6973	28.9825	27.2123	20.3601	53.9765	14.326	12.8845	30.8363	12.638	16.2334	16.6097	44.6943	20.8133	14.1261	20.9191	13.7272	31.074	38.5682	17.4861	16.4453	30.4958	34.725	15.5916	24.824	16.0541	23.6561	31.0503
ENSG00000169136.7	9.54548	8.31643	9.2866	7.59014	12.3241	13.4159	15.462	11.5286	13.6449	13.7409	10.1725	34.4056	24.3672	9.97086	35.0535	19.7731	13.0614	13.5092	30.552	19.7983	24.9324	8.54852	21.4723	12.7622	9.30845	11.4671	11.6612	18.2209	18.7397	10.8553	16.9364	19.1751	10.8926	12.0648	22.1631	10.6493	13.4811	9.80266	25.4528	5.29206	25.8871	15.9825	8.74975	9.29466	6.96807	10.3789	6.03457	10.6192	14.3984
ENSG00000171522.5	4.17553	5.28527	1.31124	4.34411	15.5712	11.2928	4.97498	10.8393	14.9192	4.30875	6.55677	4.64422	1.02948	1.0773	4.56519	4.00107	4.69866	5.93466	4.99858	2.00527	13.8071	3.56556	10.3751	4.64968	1.72518	5.76805	1.31095	2.20788	2.88447	6.92086	3.84917	7.09026	4.24785	1.19752	18.2901	8.47144	9.38268	4.1519	3.37274	3.17867	10.3598	6.69031	8.47025	8.29964	20.0939	7.07455	4.02668	4.9151	8.06498
ENSG00000051108.13	16.5292	18.0421	15.4637	15.8741	23.8922	22.8068	10.1889	27.2752	33.4391	11.5514	21.7081	30.4773	23.3405	28.2897	10.6403	30.0937	10.3409	18.5176	15.1208	23.0709	23.9493	13.9332	18.9815	20.128	28.0857	20.2671	12.5867	34.6576	11.5405	25.9875	18.2451	34.9829	20.0199	19.8951	18.4996	20.5645	21.4372	19.9336	19.9575	33.6202	10.6487	31.9741	15.6431	9.10661	42.6992	14.8267	21.8799	20.0359	27.2525
ENSG00000133661.14	0.107624	0.079002	0	0.02467	0.0480679	0.014514	0.212004	0.210594	0.140676	0	0.251109	0.182273	0	0.110302	0.0530568	0.0618411	0	0	0	0.0536855	0.502735	0.0228935	0	0.130911	0.206093	0.071587	0.0483797	0.138307	0.117893	0.0546108	0	0.0170901	0.457511	0.0646979	0.0192769	0.0610613	0.106618	0.11292	0.057872	0.287855	0	0.164321	0	0.413623	0.0194046	0.0148967	0.206613	0.0777724	0.0395789
ENSG00000152270.7	1.77102	2.38729	0.938777	2.11285	2.71015	1.88831	3.50352	3.11098	2.60963	1.6344	1.46174	2.84652	1.49028	2.04652	1.5937	1.13742	0.390177	2.02611	0.394076	1.48618	1.62809	1.66104	2.46852	1.66429	0.709285	1.55578	0.129653	2.53135	2.17804	2.5265	2.15126	1.41739	2.93023	1.13156	0.489414	2.40808	3.05427	2.47667	1.96069	1.62045	6.31898	2.242	0.841069	1.2446	1.79327	2.41381	2.67673	1.3734	2.78903
ENSG00000181045.13	2.18926	1.9923	0.714015	0.797611	1.4548	1.09493	2.49769	2.51073	2.12629	0.967592	1.85456	3.30013	0.568498	2.64068	1.27511	2.13269	2.339	0.988831	1.82308	1.10411	3.57589	1.38166	3.18238	2.41018	4.28113	1.58543	0.811416	1.76381	2.79519	1.30951	0.948358	2.41738	2.45052	1.68213	1.22052	2.00298	2.25856	3.7269	2.13224	1.23228	1.20934	3.25033	1.29234	1.27229	1.77756	1.71781	3.01994	2.3224	2.2127
ENSG00000141161.10	0.0208622	0.00367535	0.00505286	0	0	0.00675225	0.00448315	0.0122466	0	0.0242641	0.0137437	0.097517	0	0.00366535	0.00246832	0.00719247	0	0.00340125	0	0.00832524	0.0116942	0	0.0048372	0.0101504	0.0191758	0.0133216	0.00281342	0.0150135	0.00249302	0.00635155	0.00702808	0.00795069	0.00851378	0.00752473	0.0224201	0.0177544	0.00620014	0.00984991	0	0.0148796	0	0.0350376	0.00802697	0.00801779	0.00451373	0	0.0210265	0.0180907	0.0138098
ENSG00000136870.9	6.75725	5.81239	5.82597	4.65151	4.88918	9.90764	8.83269	5.64546	6.38208	4.98291	7.05935	6.55085	6.05186	5.76625	6.78627	2.66516	1.41549	7.80954	3.21964	5.90816	5.89055	6.54531	5.86538	4.27337	2.82321	5.56986	3.70463	5.81161	7.05212	7.42843	6.84197	3.87336	6.76728	2.35262	11.1116	7.18979	5.33852	6.48505	3.93045	5.13211	4.66064	5.99628	2.7221	3.60763	6.64544	3.1527	4.64599	5.97031	5.55125
ENSG00000168807.15	2.68986	4.63947	3.47248	4.93704	3.86023	4.69472	3.89052	5.25634	3.34593	3.25327	5.41218	4.54987	2.75729	4.76596	3.35713	1.89856	0.772578	6.10669	1.80061	3.15752	2.93219	2.77464	2.2644	2.58305	2.53364	4.0642	2.68744	4.98434	4.94772	5.17953	2.6514	4.74839	4.90842	2.21562	5.22963	4.79275	5.72997	4.95461	4.20372	1.17232	4.26507	5.04476	3.89147	1.31412	3.211	4.43192	3.66391	4.19272	4.7201
ENSG00000124523.13	6.01528	3.01839	3.01578	3.11119	4.00968	2.61985	5.31769	5.65426	2.87249	2.7029	3.36928	3.06624	2.75956	3.70483	3.7447	4.02153	1.9686	4.38716	3.11176	3.21447	3.62765	6.92917	3.72172	3.40239	7.89219	3.28462	5.11712	3.79584	7.90282	6.00675	7.06735	3.38096	1.94667	4.55497	2.75661	2.59476	4.72067	5.68385	3.85227	5.68908	3.57452	3.0844	3.31501	3.22806	2.6174	5.28313	5.08101	3.71285	3.81516
ENSG00000159398.14	0.00739552	0.0390867	0.0268682	0	0	0	0.00794626	0	0	0	0	0.135271	0	0.00649672	0	0	0	0	0	0	0	0	0	0	0	0	0	0.00760315	0	0	0	0	0.00754522	0	0	0.00629385	0	0	0.00596511	0	0	0.00564574	0.0142276	0	0	0	0	0	0.00815914
ENSG00000239697.9	1.33672	10.8194	1.84786	5.86222	6.57844	3.86725	12.7096	4.87345	3.17469	3.38387	11.0908	13.6345	5.74138	4.25394	3.3123	4.30416	7.42224	1.86064	6.75198	4.20202	11.9993	3.23508	9.22505	5.95157	1.56482	3.41224	4.3451	16.9253	2.9461	6.98757	2.08165	7.97789	20.8426	4.66219	7.19627	8.86466	7.36443	6.84708	6.26563	6.74572	2.15383	12.3032	6.2349	3.10177	3.46509	2.68106	5.61959	5.00291	9.85016
ENSG00000156398.11	2.84319	2.31482	3.53243	1.35078	3.49604	3.29335	2.69999	1.7429	3.57602	1.47503	1.87743	2.40063	3.32809	1.79551	4.04441	3.63008	2.17141	1.95705	3.0985	3.08073	3.17425	1.76169	3.09786	2.62248	1.39615	2.98036	2.26118	4.1935	4.03906	1.18529	6.12796	2.31549	1.45639	2.19143	2.72588	1.65159	2.24394	1.68495	2.90942	1.36734	4.75624	1.53105	2.36607	3.70091	1.35282	1.00181	1.66041	3.15006	1.39918
ENSG00000164466.11	10.865	8.02145	7.95447	7.31231	8.54239	9.37634	8.37228	6.16311	9.19347	9.46818	7.64582	7.69854	16.9161	8.7336	5.92028	14.3112	4.28692	10.0073	5.72466	9.37838	6.76217	5.4318	6.02594	7.64328	8.79452	8.88964	6.6467	4.39628	4.60336	4.09675	11.0376	6.43111	6.06607	6.80048	16.2333	10.2851	3.65498	4.70333	8.87209	6.24386	9.03015	6.21121	6.97744	5.38194	9.74627	9.51963	7.38706	6.48327	4.23269
ENSG00000005469.10	3.5788	2.07927	1.54455	2.53303	3.065	0.319614	3.11408	5.00068	3.9712	1.53005	5.39646	1.89569	0.160689	1.9231	3.04057	2.53493	1.08333	3.282	2.5481	4.406	1.88737	3.82053	2.94622	3.97108	3.38466	3.06168	1.02687	3.03589	5.9401	2.80363	0.128259	3.6818	2.95206	1.61354	2.14806	3.40614	2.96309	2.70757	2.47971	1.7905	2.91577	3.17528	2.98469	1.39919	3.57293	2.46229	2.22353	4.41914	2.96124
ENSG00000022355.13	0	0.0113973	0	0	0	0	0	0	0	0	0	0.100801	0	0.00757754	0	0	0	0	0	0	0	0	0	0	0	0	0	0	0	0	0	0	0.0352019	0	0	0.0110114	0	0.00339386	0	0	0	0	0	0	0	0	0	0	0
ENSG00000102837.6	356.721	4905.29	32.5186	40.711	1210.74	972.952	153.69	363.483	5325.22	482.431	192.183	39.0388	1.32741	1.27896	1452.59	501.122	182.6	2654.2	2348.76	334.046	103.789	189.482	89.7129	454.32	9.15328	200.701	0.744546	3.88069	1123.3	0.796861	202.104	423.021	0.175241	122.033	623.012	6749.15	224.895	16.6957	226.226	1.53135	233.344	887.77	967.437	1339.65	44.1618	252.289	3.62132	483.158	179.699
ENSG00000163879.10	0.717877	1.14292	0.148113	0.321795	2.62199	0.318403	0.468515	0.187294	0.32112	0.0706825	0.367833	5.24144	0.0521272	0.518519	0.103811	1.20081	1.91932	0.498497	1.63928	0.0954918	0.439662	0.0950163	0.184945	1.31951	1.52743	0.237689	0.114739	1.20818	0.333612	4.16073	0.443372	2.42175	2.66922	0.728839	0.148583	0.583785	2.09399	4.48991	0.210166	0.445642	0.0897664	0.686049	0.439893	1.8904	0.638536	1.05106	0.218208	0.411164	1.71893
ENSG00000046604.11	58.2199	83.8669	51.3315	96.8564	89.5294	113.496	44.1372	76.1588	99.8153	94.7651	50.8811	42.2555	85.4274	72.6525	76.6938	59.2168	12.1209	76.0364	47.7462	93.3131	74.0878	51.4462	99.5816	33.7252	36.835	109.22	52.586	17.1291	34.3745	28.8447	97.9725	74.2309	44.8739	27.8489	91.0026	92.5983	83.6124	38.8069	73.562	63.6013	131.962	31.5227	56.5948	44.7607	144.599	76.9945	102.373	42.6053	65.1942
ENSG00000136270.12	22.2334	16.5633	26.0002	33.117	17.1501	15.5684	21.8095	23.4904	22.9129	19.1525	21.9505	13.9042	18.8529	17.7737	23.9867	46.2588	36.753	24.2952	40.8271	29.5708	23.6668	36.5587	23.6029	43.1464	45.2732	32.8465	34.2042	18.6094	31.7484	27.5547	17.2257	24.6807	11.1355	49.1838	20.5851	25.3502	35.4078	25.0143	43.2668	23.1094	28.3625	20.0559	36.3236	32.7904	8.25589	34.8775	29.3166	30.8023	22.0244
ENSG00000276023.3	6.57095	6.02199	9.50766	4.99464	4.93786	7.65693	4.82911	3.74785	3.91892	3.37144	3.623	8.46929	9.09864	10.1121	4.50987	5.91687	12.0561	5.45693	9.69211	6.30955	5.036	2.65029	5.02361	5.12087	8.37773	6.0471	7.01369	3.0609	5.50677	1.60217	5.73372	7.10976	6.07516	8.00281	6.11399	8.65042	5.53028	5.79	7.082	10.8036	4.71717	6.01517	6.58513	3.62588	1.83609	4.86649	5.67251	6.92041	7.09252
ENSG00000198624.11	1.01083	8.80375	6.54019	3.62899	2.46293	2.95678	4.91553	3.06442	3.88191	3.44183	3.84548	20.0515	3.92326	6.78703	1.90626	2.34785	1.16788	1.87238	6.14063	2.26311	6.26472	3.39795	3.0535	2.38982	1.43949	4.14403	3.73435	9.23581	2.23157	1.47374	0.711438	3.99703	35.7128	1.71171	8.77216	7.74633	3.55068	6.19911	5.28237	2.17473	0.475959	14.1437	2.06334	0.592759	3.23434	1.16266	4.51317	4.98974	4.10479
ENSG00000126821.7	8.06296	6.31463	2.39993	6.50404	5.77717	5.239	6.50332	7.60162	5.77922	3.5067	6.56903	6.7102	5.57943	3.00417	4.27046	4.16846	0.968352	5.41212	3.19217	4.28966	5.13324	5.25953	5.80596	3.53315	4.83341	7.32661	0.839392	6.46892	7.26273	3.03854	4.1937	5.8962	5.55467	1.5741	6.16629	9.09639	3.00864	2.53904	4.53569	4.61798	3.37453	8.75501	2.17465	5.33419	5.56475	3.43425	4.07405	2.92102	5.61987
ENSG00000136897.7	14.0877	9.13321	9.58517	13.1647	7.52749	17.09	12.7528	10.4017	9.98322	10.3979	13.4926	9.23528	12.8269	11.9695	11.342	6.48486	2.40635	17.5708	4.18261	11.9829	9.12857	19.0784	10.355	8.50306	11.6188	8.53141	14.1121	9.05842	13.1466	12.8823	11.1101	4.45151	8.00267	5.05306	18.9534	12.9091	7.88329	8.71298	9.14886	27.3767	10.1052	9.49507	4.84308	9.92107	4.77743	7.09303	5.44213	7.99102	7.28866
ENSG00000169840.4	0	0.012551	0.0172551	0	0	0	0.0153096	0.0975826	0	0.0118371	0	0.289576	0	0	0.0421456	0.0245616	0	0.104535	0.231181	0	0	0.0181854	0.0495559	0	0	0.011373	0	0	0.0340537	0	0.0600007	0.176481	0	0	0	0	0	0	0.114926	0	0	0	0.109646	0	0.015414	0.0236664	0	0.0205928	0
ENSG00000101307.14	0.171169	0.253579	0.263821	0.0963066	0.257146	0.513085	0.259154	0.0685094	0.417979	0.00646366	0.474122	0.272763	0.0974554	0.0273393	0.126575	0.134119	0.0239338	0.168073	0.473387	0.0155242	0.626934	0.0248254	0.0225501	0.00473193	0.0134091	0.804226	0.089186	0.127982	0.104597	0	0.419372	0.429948	0.130975	0.0140315	1.34201	0.529712	0.393092	0.220408	0.298089	0.520243	0.0115889	1.32749	0.209552	0	0.0715431	0.0323076	0.0896194	0.413243	0.472108
ENSG00000198722.11	6.05144	11.1296	8.02013	13.5178	20.4197	11.8874	8.1631	10.9085	15.0105	12.2227	22.7437	8.02123	6.85563	7.17581	9.23384	12.9179	5.04461	15.4217	11.9906	7.15917	19.5722	7.78272	20.2272	10.2834	16.5556	14.9294	4.59558	33.988	6.56376	21.5379	15.6775	6.54795	16.646	3.66356	12.2202	10.4701	14.149	25.2648	6.92267	9.87993	13.8439	13.0823	12.9537	8.22572	22.9145	14.4395	20.3381	13.9676	13.518
ENSG00000198707.13	1.09717	1.26584	1.54967	1.93564	1.03914	0.956066	1.28181	2.408	1.19321	0.930437	1.6943	2.31093	1.08572	0.787494	1.63008	0.440388	0.0842016	1.13611	0.323832	1.31761	1.40648	1.14413	1.38304	1.48717	1.52007	1.89898	0.607535	1.01189	2.39735	1.93061	1.44081	1.33656	0.844771	0.308526	1.24529	1.47922	1.78629	1.5634	1.50499	0.484004	2.16539	1.9886	0.179918	0.0701318	0.434298	1.6121	1.45657	1.15713	0.89589
ENSG00000099904.14	5.48556	5.7397	10.6248	9.00874	4.77016	6.805	4.2678	6.86868	8.89932	3.85035	5.34116	8.13758	6.00279	4.30432	4.76275	8.27681	15.4672	6.32935	6.03527	4.86269	10.6112	5.83346	10.3448	7.41617	10.8516	6.68551	5.30754	7.77364	10.8521	9.68473	1.54839	5.82935	6.27709	9.12181	4.9303	7.50293	7.85917	14.8339	7.05242	1.86781	5.20091	9.76581	4.92701	5.43899	2.74743	2.66311	10.4869	9.6799	8.64635
ENSG00000260916.4	1.52038	1.94713	0.822661	1.26056	2.26107	1.49632	2.14627	3.16753	1.97038	1.63035	2.61723	1.98597	2.0553	3.59713	1.36987	0.701678	0.138207	0.815258	0.666999	2.28327	1.89261	1.72371	1.6626	0.99025	1.13669	1.64604	1.10878	3.21619	1.841	1.71529	2.47693	2.22421	3.46534	0.700062	2.00474	2.14731	1.81661	1.39579	1.62421	2.32643	0.894062	2.26163	0.757159	0.740754	2.62459	1.45295	1.85528	1.47658	2.01938
ENSG00000167034.9	0.383934	0.453052	0.0350904	0.109593	0.33648	1.69984	0.256855	0.552816	0.119306	0.0842529	0.345991	1.17042	0.662774	0.350001	0.0899938	0.112386	0.0148559	0.153533	0.058767	0.086724	0.994851	0.147929	0.327529	0.167417	0.166462	0.0867317	0.0244228	0.949545	0.510738	0.551367	0.146423	0.234663	1.22685	0.117578	1.01984	0.641153	0.252965	0.262217	0.0525864	0.322919	0.02158	0.431348	0.153298	0.528968	0.156732	0.132354	0.255538	0.308851	0.215784
ENSG00000139324.10	3.07873	3.46685	1.96993	2.80657	2.19834	3.8257	2.89103	3.993	2.10257	1.78931	2.73502	3.54584	4.91729	1.67047	2.91372	1.16512	0.126011	2.82868	0.826415	2.26168	2.66933	2.50128	2.06207	2.03372	1.83555	4.69283	2.06505	3.67386	2.46366	1.76241	4.79636	2.32631	4.0352	0.816516	5.44606	4.49162	2.58301	1.9875	2.99713	1.94906	4.75597	3.13785	0.889679	1.06888	1.57432	3.23903	2.43061	1.82283	3.09692
ENSG00000171195.9	0	0	0	0	0.0302586	0	0	0.0082855	0	0	0	0	0	0.0520759	0	0	0	0	0	0.346398	0	0	0	0	0	0	0	0.0043532	0	0	0	0.0161372	0.0172801	0	0.182021	0.0360355	0	0.00666401	0.00683067	0	0.0756841	0	0	0.0325469	0.00916135	0	0	0	0
ENSG00000171119.2	0.576891	1.20453	1.13849	0.675878	1.3169	1.10647	1.46928	1.60963	0.46919	0.372756	0.967716	1.78035	10.1234	1.10741	0.796312	2.32038	6.39737	0.783774	2.77334	0.468954	0.718608	0.381779	5.84584	0.337861	1.3993	1.12559	0.518653	2.15269	1.2128	2.01656	3.13109	1.01785	3.24802	1.54131	2.75543	1.00009	1.23825	0.689343	0.310207	0.495274	0.190951	0.636131	0.78099	5.25539	0.369825	1.06467	0.707566	2.13071	1.29649
ENSG00000163687.12	0.0376354	1.91617	0.483115	0.331274	0.564783	0.103539	0.37203	1.08255	2.89847	0.15633	2.10747	3.99264	0.0737861	0.0330615	0.231549	1.01207	0.355036	0.0797662	2.16774	0.232791	2.23621	0.710906	0.113442	0.247204	0.00864832	0.216289	0.954178	0.572642	0.584663	0.515619	0.145805	0.401606	0.0998327	0.529411	0.331657	0.986495	0.564846	0.0533078	0.309633	0.46975	1.1959	0.275816	3.21471	0.173569	2.01941	0.312557	0.541884	0.255647	1.5529
ENSG00000164932.11	7.24466	28.5819	6.4952	18.1295	38.1844	26.1578	28.3699	7.8712	3.98662	2.28329	23.7097	21.3667	35.6178	16.6899	7.48237	9.13056	23.3392	17.01	9.14593	2.96825	55.9785	5.29581	4.33093	15.8392	4.92072	16.613	2.87881	51.3751	3.58729	20.6146	4.53959	61.6899	53.9579	11.357	20.4894	58.4186	16.2968	19.1813	27.42	121.994	1.78855	57.2206	8.88089	3.79442	2.12169	1.85041	16.7992	10.2679	48.442
ENSG00000111218.10	0	0.0188492	0	0.00490504	0.00955715	0	0.007664	0.00348929	0	0.0325912	0	0.695818	0	0	0.00210982	0	0	0	0.0144662	0	0.0149935	0.0136555	0.1075	0.00433808	0.00409767	0	0	0.020166	0.0106546	0.0217161	0	0.0067959	0	0.00643181	0	0	0	0.00841927	0.00287661	0	0.00354144	0.0027226	0.0068611	0.0137065	0	0	0.0025675	0.00257719	0
ENSG00000163736.3	0.563383	0.467073	16019.2	0.729266	0.414437	37.7024	0.356081	0.0324235	3.3268	0.853479	0.245614	0.168379	0.0721923	0.232901	0.11763	0.571273	5.84483	0.189105	0.672122	2.90948	0.92883	0.126891	0.230521	0.927147	1.1423	6.34851	3.99994	0.238494	0.475228	0	2.53988	5.05197	0.777653	2159.06	0.106845	7.75596	0.270851	0.156469	3.23438	11.5229	0.263266	0.278292	8.54323	0.25473	0.071702	0.055045	26.9119	0.239481	131.002
ENSG00000278224.3	0.0414736	0.0730653	0.4018	0.114081	0.246977	0.234909	0.193102	0.202884	0.0216841	0.298607	0.102459	0.224767	0.120461	0.0971552	0.147209	0.142985	0.028351	0.0225387	0.112151	0.0689601	0.368091	0.0352886	0.22438	0.201789	0.0794192	0.110346	0.093217	0.0852759	0.206503	0.357758	0.128074	0.250259	0.155148	0.0249317	0.133712	0.070591	0.184887	0.206693	0.100356	0.0246503	0	0.0949828	0.106383	0.0531307	0.0897321	0.0688865	0.0796196	0.0999001	0.122016
ENSG00000174326.10	0.30185	1.23741	0.0702969	0.0958032	0.29037	0.0939393	0.53639	1.87416	0.437039	0.347214	0.286811	2.30047	0.214967	2.63126	0.831029	0.22014	0.238088	0.369089	0.894735	0.335887	0.178963	1.20021	0.323024	0.578986	0.466865	0.667201	0.109595	1.97534	2.13651	0.812954	2.09242	0.331837	0.201359	0.167498	0.0249532	0.128443	0.112136	0.0913566	0.187283	0.041402	1.04908	0.257021	0.781715	0.290019	0.288863	0.684556	0.125369	0.503367	0.281784
ENSG00000147872.8	8.87989	18.5659	9.43342	11.5529	17.0418	4.24852	7.71403	3.12234	19.5917	11.2088	12.0429	8.20439	19.968	3.45834	11.5151	21.8124	10.7774	13.4253	20.485	22.0267	15.5321	20.0089	2.49535	39.0794	17.0865	16.7304	13.5082	14.896	21.3425	10.5814	7.34527	12.5042	7.16786	7.43584	6.74922	14.8842	21.9287	17.964	5.70811	25.9269	30.8574	30.8643	26.3777	2.88274	5.13577	7.4288	3.77662	21.0552	16.9413
ENSG00000168078.8	27.2304	12.0414	6.68009	17.2203	8.80853	39.1342	6.29145	8.17021	13.9739	6.21921	5.78621	8.48576	31.2566	3.25933	28.5791	15.8667	1.25693	18.2451	5.68245	12.0545	11.7485	29.5718	13.2087	15.1366	10.2109	21.901	20.4496	6.91995	10.3846	3.66536	12.4254	8.29003	5.99626	13.1258	22.3361	25.8938	5.00918	2.76459	23.0318	19.9447	30.5501	9.59174	4.50588	13.0395	2.47455	12.3616	2.73409	6.23226	1.4852
ENSG00000142089.14	587.336	304.243	378.572	949.338	209.869	337.505	1003.02	230.521	609.664	452.932	299.349	168.655	405.798	170.786	289.056	367.402	1688.67	487.492	496.039	177.998	462.441	278.418	171.099	485.637	442.243	279.055	687.194	300.205	494.915	117.496	160.908	361.718	705.053	1083.16	465.733	204.916	399.215	175.531	540.813	361.45	419.584	604.383	479.963	597.03	98.9018	249.53	202.538	483.645	512.268
ENSG00000171671.6	0	0	0	0	0	0	0	0	0	0.0116964	0	0	0	0	0	0	0	0	0	0	0	0	0	0	0	0	0	0.00723722	0	0	0	0	0	0	0	0	0	0	0.011356	0.0251044	0	0	0	0	0	0	0	0	0.0155329
ENSG00000182154.7	24.1271	16.6549	18.7133	29.5677	18.2812	25.0373	27.1343	21.0336	29.5536	33.4896	31.1708	26.4441	38.3859	24.3122	19.7824	84.7992	133.421	22.2084	90.0968	37.8569	41.6255	31.2967	52.3942	46.3165	59.5194	19.6626	38.3356	33.0469	25.8027	62.423	12.0338	13.7567	18.3706	59.6636	22.0345	19.1109	19.3351	24.0239	20.3541	70.9089	18.7937	23.7507	76.6856	133.929	29.7771	17.1369	14.3686	38.6147	18.3325
ENSG00000158806.12	2.95186	0.900454	0.570288	0.742456	0.123117	1.66358	2.29546	0.977657	0.882774	1.48855	1.20122	2.32262	0.137613	1.10989	0.577556	1.26716	0.635981	1.38571	0.978372	2.05113	2.36609	3.357	5.313	1.64858	0.936969	0.605078	0.340769	0.572702	1.02255	0.139876	0.0677138	1.0615	0.820282	2.75496	1.13561	1.08501	1.37395	0.144612	0.546593	3.17443	0.54746	1.438	0.464027	1.56706	0.236081	0.267087	0.587083	0.3984	0.430841
ENSG00000163638.12	2.21644	2.77125	1.77061	1.2938	1.38926	1.6552	2.18602	4.52586	2.16631	1.89294	0.87332	1.62776	0.548557	1.02128	0.61688	2.32532	0.468647	1.46314	0.953934	0.872095	1.82507	1.10719	0.347239	0.860887	0.219227	1.43089	0.234874	2.85802	0.562072	1.33407	1.39581	1.94686	3.63302	0.412125	5.16925	2.44705	1.41271	1.29718	1.52468	0.348133	1.18308	5.76543	1.89511	0.588348	0.681639	1.40588	1.76974	3.11194	2.48446
ENSG00000119715.13	0.0046727	0.00411602	0	0.0192797	0.0876521	0.0113427	0.00502067	0.365732	0.0109939	0.0310552	0.0230874	0.142447	0	0.0246289	0.0138214	0.00805483	0.00958266	0	0	0	0.0327408	0	0	0.0341024	0	0.0261079	0	0.0264214	0.0195435	0.00711308	0.00787073	0.0445198	0.0476728	0.0252808	0.00502165	0.0198831	0.0208306	0.0110309	0.0150757	0.00833183	0.00463998	0.0535071	0.00898938	0	0.0151647	0.00388061	0.0235475	0.0135065	0.0206207
ENSG00000110060.7	7.37971	5.48288	5.81042	8.82013	5.39151	6.50547	4.48397	3.88687	5.51027	7.42353	5.43637	7.28336	2.64508	7.99481	6.24865	5.83224	2.17584	7.57252	3.87323	7.22123	6.74026	6.8459	5.24809	7.08366	5.5127	5.73985	5.99351	7.80505	9.02298	4.30692	3.01826	5.05432	3.99306	6.33553	6.71459	6.17004	7.83918	5.78857	7.29307	10.8464	9.66928	8.03653	4.87602	5.66331	3.78763	4.67978	8.08793	6.58507	6.99718
ENSG00000131408.12	14.5783	17.5743	14.6879	16.1686	29.0051	15.0656	21.3488	19.1244	19.1329	21.5629	21.062	23.3853	14.4895	31.5976	20.849	22.4093	31.9297	11.3691	30.7573	23.1419	26.0478	10.3306	25.1721	20.1824	15.4586	14.0905	19.1022	20.6509	19.4279	21.9037	14.2028	23.0753	23.7819	18.7989	14.7442	15.1899	18.4497	17.9901	11.7637	8.37584	12.2882	16.0164	24.657	25.6965	23.4068	17.2928	14.2677	21.0922	23.8572
ENSG00000105550.7	0.0361208	0	0	0	0	0	0	0	0.0424923	0.765198	0.0148725	0.0183523	0	0.0317309	0	0.0311326	0	0.0883339	0.0732572	0	0	0	0.0209379	0.0219681	0	0	0	0	0.010791	0	0	0.0172073	0	0	0	0.01537	0.0134187	0	0.0728362	0	0	0.0413619	0.138979	0	0.0390754	0	0.0130019	0.026102	0
ENSG00000164904.14	17.3797	15.6233	4.86627	6.03117	7.3779	12.9364	12.4812	11.1537	10.9574	16.2101	4.7377	7.83213	16.4652	7.82501	19.0336	11.6965	6.10321	10.998	8.30266	7.2516	5.79934	6.81776	7.2502	10.176	8.34356	7.5779	11.8414	5.13928	11.4127	11.1171	10.0258	8.66649	4.45649	11.4639	17.1043	12.9554	8.19509	7.03369	8.48172	8.03931	16.1039	10.1399	12.0839	13.9215	3.45686	8.27463	12.5983	7.33625	8.46557
ENSG00000122390.16	3.29019	4.54905	7.14963	4.71007	5.37499	4.06989	6.11776	3.4246	6.09996	4.78251	4.6645	8.61248	6.60437	7.00617	4.99155	5.25153	12.9434	5.24767	6.57914	4.34306	8.7092	3.63616	7.32189	7.47261	8.69517	4.07513	5.01224	5.65704	2.92246	13.4712	5.14919	6.03734	5.44889	6.60053	3.91974	3.62614	6.241	6.05107	4.83652	1.96306	3.74283	5.45331	5.88508	3.88391	10.4143	5.49632	5.8717	5.80581	7.16248
ENSG00000162775.13	2.42534	2.66379	3.12759	3.59387	2.66953	3.0956	3.42372	2.90902	3.60922	3.19935	2.83289	3.05747	3.19432	1.774	2.86656	2.4665	0.551491	3.4702	2.0581	2.0248	2.98638	2.49321	2.97058	3.56111	3.99337	2.84307	2.282	2.43344	3.95025	2.75742	3.64511	2.8087	1.96712	1.72945	3.71339	3.07016	2.89526	5.93714	4.03116	1.32995	6.23755	2.45576	2.52817	1.36502	2.60726	4.48352	3.33499	3.45391	2.88288
ENSG00000117385.14	2.31839	5.47258	3.61341	4.4409	5.0897	4.49146	5.38095	3.59426	3.74357	2.23152	2.9618	7.24909	2.80364	2.70115	2.69123	3.07281	9.96867	3.80832	6.00886	2.08584	7.44993	2.4092	3.21152	5.73377	4.09218	3.84639	1.55854	7.15945	2.79976	5.16587	3.30637	7.70106	8.00708	5.47583	4.46744	6.73276	4.47288	5.77069	4.77099	2.66643	1.91615	8.5472	4.42646	4.65694	0.712251	1.93412	3.17924	4.40346	5.74534
ENSG00000153283.11	0.0534603	1.0179	0.742032	0.58821	0.499577	0.585639	0.181161	0.321872	0.696631	0.266476	1.59501	4.82233	0.774889	0.187852	0.8612	0.425332	0.109635	0.603406	0.550459	0.221544	2.95059	0.566847	0.367099	0.440186	0.137022	0.69259	0.790274	0.864582	0.717475	0.344303	0.117756	0.622975	0.73842	0.459813	2.31136	1.40339	0.476645	0.763698	0.918793	0.945911	0.253179	2.08139	0.379744	0.252874	1.50811	0.239066	0.509209	0.8083	0.521749
ENSG00000144891.16	0.0476903	0.276057	0.00825049	0.0374802	0.0425996	0.016538	0.175686	0.0399934	0	0	0.280516	0.131537	0.0296823	0.412958	0.00806073	0.0117441	0.0558869	0.00555368	0.082904	0.0271875	0.0668314	0.0173906	0.00789835	0.008287	0.0469665	0.114198	0.0321569	0.651387	0.0366362	0.466696	0	0.194732	4.803	0.0614332	0.0805384	0.614589	0.242971	0.675498	0.208817	0.0607399	0.0135304	0.32246	0	0.0261835	0.0294807	0	0.578753	0.334777	0.172876
ENSG00000110448.9	18.4942	6.12367	1.94212	2.32707	1.65595	2.38695	0.482163	2.08725	12.0235	1.57065	2.33837	19.9069	0.472746	0.76903	3.20738	1.49638	0.754326	0.731609	6.29616	0.521082	6.11331	2.91062	0.921084	3.2303	0.202856	1.57366	0.793662	1.67143	0.949424	1.17584	0.359348	1.16349	1.42603	0.875621	2.01599	2.92371	1.6452	1.81191	3.45337	0.43287	1.95043	7.45797	5.1232	3.3079	1.23353	1.17302	1.63118	1.58417	1.72061
ENSG00000066455.11	19.74	14.8418	9.10061	22.1052	27.8722	19.8654	15.894	25.6172	17.6922	18.0243	16.7945	13.1023	15.4617	13.5253	12.5201	11.8633	3.49521	20.4236	8.45915	12.0171	18.0389	17.6406	15.2567	15.1415	16.0127	14.9297	14.4694	21.381	22.399	22.7917	15.6743	14.8063	14.8498	10.453	14.3051	18.6355	11.2631	19.257	15.632	22.5294	16.6598	19.7579	8.01026	12.1468	19.7911	13.121	18.6582	11.339	18.1446
ENSG00000170265.10	10.3821	10.9209	13.7785	11.2174	11.4943	11.748	11.4543	14.6889	11.6146	10.161	12.2565	9.81476	19.37	13.3682	9.3024	13.7077	10.2589	13.1812	18.2094	11.499	17.0534	9.35997	17.6995	17.5174	19.3175	14.0369	11.4577	18.8997	19.116	15.3243	12.28	10.5339	10.3904	16.0026	10.3534	11.8246	12.57	19.2736	10.8279	2.49182	15.2032	15.0631	16.4758	10.4446	7.55224	15.1235	13.5017	17.4401	12.4092
ENSG00000119318.11	63.1017	47.5744	50.1405	53.7031	39.8735	57.1368	53.8711	51.0223	46.6575	43.6953	53.773	44.9947	46.6794	46.0602	44.3795	47.2185	25.7131	66.8118	31.8434	44.3337	32.4646	57.2933	34.9884	39.0957	53.913	53.6785	36.9471	46.6386	54.5177	40.1269	55.3931	28.5294	37.9569	23.0008	55.6142	54.8117	37.1104	52.055	55.2287	34.9175	52.7945	43.2528	42.3848	32.6871	31.1323	49.0366	29.7221	49.6656	35.8453
ENSG00000104951.14	0.619423	3.45293	2.16082	2.40317	2.76651	2.01979	5.21514	1.01306	3.5818	1.54378	1.33231	4.11481	7.18979	1.00707	1.16494	11.3948	5.57415	1.43944	5.40005	0.562626	13.3574	0.672576	1.13612	2.19287	0.169956	1.79318	1.29041	3.27911	1.4307	1.01329	1.68184	4.40421	3.25413	2.20084	6.57732	5.16923	3.03611	3.27376	6.37571	6.29722	1.88198	6.6272	4.25082	1.04817	0.770104	0.867608	2.76876	2.58547	6.59922
ENSG00000131143.7	101.629	64.7207	81.0436	91.1705	97.3755	68.0698	103.826	117.177	67.6242	98.6678	83.8817	63.1601	80.0653	89.756	99.5654	194.82	239.663	101.323	168.539	89.8765	120.35	108.379	92.5122	116.859	143.76	60.3275	204.245	66.2593	76.0452	87.4663	70.3174	54.0231	60.2657	207.904	70.1344	56.9616	76.4097	71.9804	69.4453	228.526	52.7103	57.6	197.808	245.092	64.7095	98.7872	56.7537	74.6589	67.9296
ENSG00000172667.9	3.47347	5.92673	1.71053	2.49334	2.77794	2.81652	3.37053	3.82856	3.52555	1.99381	4.33705	3.87907	2.62208	2.33705	4.36252	0.995108	0.403016	2.53511	1.39497	5.80082	2.39937	6.17952	1.60335	2.15135	0.790273	4.46656	1.96281	3.26667	1.28721	2.37079	1.19787	5.19112	6.71914	0.806282	3.04384	8.80123	2.66106	3.11989	1.58707	3.21939	5.13958	4.41066	1.34686	0.656137	1.74858	2.7133	3.62886	2.40175	3.2115
ENSG00000151665.11	6.25463	2.64573	2.7208	2.97871	2.1387	3.76681	3.41646	3.24597	3.27765	2.61782	3.56308	2.34107	2.32787	2.8016	2.88913	2.10056	1.72782	2.9412	1.56392	3.26717	3.04174	3.66942	2.13561	2.64599	3.29783	3.42324	3.27379	2.8799	3.97603	2.0651	3.50777	2.87982	1.96682	3.36507	3.27901	2.91666	3.20418	2.9366	4.05818	5.67813	3.18577	2.55818	1.93219	1.60985	2.53863	3.02413	2.63176	2.07415	2.9986
ENSG00000116039.10	0.017863	0.220288	0.151426	0.0737031	0.0239343	0.0433615	0.143949	0.0436917	0.0420278	0.333897	0.0882594	4.51069	0.145922	0.101998	0.0898226	0.092377	0.109899	0.0436842	0.543423	0.0623734	0.125163	0.0455972	0.165672	0.065184	0.0923574	0.0784192	0.0240896	0.0550935	0.2775	0.176749	0.00752214	0.110625	0.683421	0.0966445	0.019197	0.114015	0.19908	0.463863	0.03602	0.0637025	0.0177379	0.177276	0.20619	0.102977	0.0289862	0.0519224	0.0835885	0.109721	0.0788296
ENSG00000101280.7	0.00506742	0.0267823	0.0245468	0	0.0226325	0.0123009	0.00544478	0.0247892	0.00794837	0.0252589	0	0.242018	0	0.00445156	0.00599556	0.00873525	0	0.0123924	0.0205546	0.010111	0.0497091	0.0129351	0.00587478	0.00616385	0	0.00808951	0.0034169	0.0416775	0.0090833	0.0539976	0.0128034	0.0531086	0.01551	0	0	0.0474381	0.0112951	0.0398757	0.081746	0.00903565	0.0100639	0.0889747	0	0	0.0219277	0.0126253	0.0255367	0	0.0391346
ENSG00000148082.8	0.19569	0.739959	0.0317904	0.236319	0.147089	0.131309	0.530787	0.231151	1.55157	0.128868	0.269235	0.521383	0.395098	0.138365	0.153885	1.71546	0.122353	3.73708	0.212961	0.0714257	0.0568533	0.505612	0.171535	0.232226	0.0466133	0.230487	0.0997682	0.142301	0.603159	0.366916	0.0582869	0.322871	0.304347	0.154939	0.107717	1.53135	0.741164	0.152112	0.687185	0.285104	1.00478	2.93679	0.748351	0.165091	0.0542152	0.105042	0.310967	0.270752	0.44759
ENSG00000119541.8	13.6241	8.98743	14.9561	7.43922	8.35354	21.3636	10.3963	19.5939	21.3697	11.3275	12.1101	13.8554	14.8572	14.8	17.2922	14.7765	3.72758	13.1741	8.68696	17.5091	16.7529	11.9918	17.9465	9.03741	9.5713	22.4373	17.7658	10.9467	12.5764	6.77104	18.0647	14.3827	14.6618	6.40747	23.234	25.9604	13.9659	8.97509	18.8819	12.7291	26.4794	10.4342	8.99026	11.8713	40.0037	15.5924	15.5839	11.5317	21.4527
ENSG00000248871.1	0.013048	0.080455	0	0.0179455	0.0233105	0	0.0560789	0.0127659	0.0102331	0.0325194	0.0752141	0.0662946	0	0.0114623	0	0	0	0.0212728	0	0.0130174	0.0548552	0.0166533	0.0756346	0.0317425	0	0.0104148	0.0175963	0.0201216	0	0.0595877	0	0	0.173058	0.0705941	0.0280449	0.0555217	0.0387782	0	0.0315731	0.0465316	0.0259134	0.0298826	0.025102	0	0	0.0325087	0.00939344	0	0
ENSG00000156928.4	6.71293	3.38748	5.63323	8.94486	4.3475	4.88411	4.77991	4.03939	4.6036	7.71864	6.50592	4.39548	5.58933	5.3836	5.48547	7.11703	12.4418	6.4603	10.1579	7.51357	5.32015	8.27718	8.01787	8.96624	11.5941	6.48778	7.93269	5.38955	10.8858	4.54276	4.04203	6.03238	4.1118	16.0568	4.26507	5.48778	9.96156	5.81988	10.839	13.0669	5.49894	5.60847	9.69468	8.74953	2.22321	5.74874	6.3698	9.23951	3.86256
ENSG00000167981.5	0.8897	0.942719	1.16072	1.23546	1.22089	0.897268	0.979046	0.281743	0.822478	1.01764	1.12199	1.42382	0.833295	1.53294	1.15436	0.511224	0.193916	1.60468	0.540453	0.694649	1.12031	0.120684	1.59451	0.789434	0.79013	1.25219	1.14476	1.21957	0.143813	3.0882	0.865144	0.773963	1.03926	0.612353	1.4319	1.01321	2.17472	1.0045	0.911757	0.881341	1.04992	1.35839	1.04185	0.594663	0.567256	0.0892372	1.62447	1.09017	0.94363
ENSG00000170917.12	0.284012	0.209008	0.174148	0.192835	0.500968	0.593429	0.417184	0.41153	0.369354	0.373333	0.550654	0.310522	0.15663	0.217914	0.410469	0.495779	0.980574	0.131878	0.379146	0.487783	0.720439	0.573553	0.629349	0.389193	0.623723	0.453391	0.373315	0.360362	0.360874	0.240798	0.296724	0.301424	0.238411	0.181539	0.695442	0.281478	0.253756	0.495074	0.423363	0.448725	0.378412	0.351295	0.40806	0.518128	0.388916	0.101513	0.455514	0.246802	0.356967
ENSG00000131067.15	14.6278	9.14132	8.42668	5.41686	6.39401	0.465427	7.81992	12.8186	8.22025	1.49331	8.94057	17.3889	0.635212	23.8052	9.35768	11.3614	18.1858	10.8691	9.33266	7.08548	7.88159	6.76017	5.76083	9.49402	13.4105	2.95241	2.65572	4.63638	11.2461	11.5168	0.625735	22.987	3.62705	21.8275	0.69543	4.61644	19.7896	24.1466	7.8614	6.90883	6.72721	13.7954	13.0024	12.2506	2.83472	11.425	10.7493	13.8091	21.0387
ENSG00000187608.7	14.1367	24.9493	11.9411	22.1412	16.4249	28.7392	154.462	7.67839	27.9341	69.9009	13.8992	47.4152	22.3292	28.3948	19.5979	46.7865	275.828	34.5919	88.155	35.8357	87.8787	14.9927	17.0305	71.6577	28.7567	54.3707	67.217	43.536	15.8111	21.1368	6.03771	68.1833	71.5238	99.9824	25.1404	40.3524	42.3125	46.1001	55.2469	74.6339	9.51665	22.9088	88.9443	10.5374	132.467	15.2499	9.21738	23.9575	98.6287
ENSG00000141543.8	25.1455	18.704	28.9321	29.7612	23.6971	29.6222	21.3438	21.876	20.1696	19.8951	21.7362	16.8213	24.3279	17.6347	20.0881	41.9644	27.902	22.9789	39.3974	13.921	25.8385	23.3926	21.6744	32.623	36.9704	20.067	26.8081	15.7728	26.0895	7.86476	26.6297	19.3443	15.9349	37.5709	25.516	21.9315	21.0434	20.9884	24.4607	38.593	19.4838	16.8289	37.5823	39.9594	10.9872	20.3561	26.0703	22.4387	25.2735
ENSG00000168056.13	1.46087	12.4882	2.19372	4.58714	4.12959	2.58235	2.84228	3.32031	2.85897	1.54598	4.20495	18.0627	2.67806	33.7988	1.95712	4.54835	14.8828	1.45284	5.81621	1.72649	10.9258	2.11407	3.25956	4.5244	3.81143	3.43894	0.913817	14.2494	8.11897	7.88602	1.48399	9.16487	20.3273	6.44055	6.07937	8.37949	7.2071	12.1977	3.59657	2.38043	3.6199	14.5202	6.24347	3.57164	1.64601	1.5716	9.00089	7.13142	5.95836
ENSG00000147465.10	0.00629022	0.033245	0.0304701	0	0	0	0.00675864	0.0123084	0	0.00522567	0.0258995	0.255675	0	0	0.0186058	0.0433725	0.941688	0.0205104	0	0	0.0352595	0.0321129	0.0437544	0.0229537	0	0.0251039	0.0127242	0.00646681	0.0225503	0.0287261	0.0158929	0.0359586	0.186109	0.0226881	0.0135199	0.0214128	0.0140207	0.0197992	0.0202944	0	0.00624618	0.0720293	0.0121012	0.0241747	0.0204142	0.0156718	0.022642	0.00909099	0.0346985
ENSG00000146250.6	0.0679782	0.359278	0.0235207	0.0534247	0.0780709	0.149298	0.156515	0.32304	0.106625	0.0322706	0.063976	0.621692	0.0105774	0.145026	0.0402145	0.0167402	0.0199154	0.0633301	0.118172	0.0678183	0.299395	0.061972	1.17087	0.0826866	0.156208	0.0775135	0.00654812	0.469239	0.0812335	2.36527	0.0163576	0.175797	0.703449	0.0875675	0.146109	0.157026	0.223674	0.137552	0.0704959	0.0692634	0.0964318	0.385502	0.112095	0.0933054	0.535781	0.120975	0.125841	0.119299	0.182136
ENSG00000128604.17	3.73708	1.43124	1.38393	3.33712	3.28979	1.04739	5.51678	4.44581	1.66506	1.23285	7.01564	4.01762	1.49838	4.27253	0.823435	2.71684	5.04264	2.01325	5.9096	2.97183	4.77403	1.85947	1.48811	1.15948	7.25582	3.65297	1.71643	1.31686	8.41057	1.73963	0.907723	1.8422	2.02793	6.27076	3.405	2.77477	4.03614	3.89965	2.57305	1.5162	0.543192	4.75894	1.35453	1.00953	1.97451	4.72736	2.90482	4.69656	2.99362
ENSG00000179456.10	39.2312	12.2209	11.6882	4.26344	24.6448	12.247	12.4822	11.6389	8.11175	20.5267	29.4039	14.4124	7.94878	12.6033	23.5421	8.45992	9.23106	24.7801	11.2944	10.8393	6.83496	13.232	17.4908	5.91054	9.88349	15.4366	11.7724	2.6007	16.3399	12.8638	17.1718	31.6445	7.10516	5.8312	14.2775	13.5727	13.7651	20.2021	6.74261	5.257	12.4695	12.8188	17.7276	10.8995	6.69384	19.6534	21.3777	15.9042	13.6264
ENSG00000157349.14	3.52127	3.27717	3.03324	3.81959	3.79133	1.08966	4.35778	5.10617	2.92598	2.99934	4.35389	3.35987	4.56019	4.98983	1.88162	1.38201	2.35339	5.97154	3.16694	2.23744	3.68626	3.82543	5.46129	4.67197	4.76225	2.40912	3.75586	4.11844	3.92299	5.38424	2.64788	3.45979	2.86014	4.79116	2.65798	2.74254	4.62908	4.43675	2.59084	4.67168	3.15841	3.54019	4.61698	2.69855	3.99637	3.23335	4.32309	3.16179	4.90233
ENSG00000163815.5	0.922077	24.5368	0.597276	2.68381	2.62419	1.54425	5.71406	3.39875	2.38808	1.05106	4.29102	11.4617	0.747403	2.52423	1.43348	0.998048	4.74943	0.874013	2.00055	0.449258	2.67448	2.32633	1.46675	2.89526	0.640586	1.36929	1.04106	7.87031	1.025	2.90522	1.13778	1.49144	9.64807	0.928137	0.737441	6.00402	4.90718	2.15989	2.28309	2.14121	0.553632	3.37224	2.02142	0.618096	3.31727	1.56716	1.91426	2.49483	4.73156
ENSG00000106927.10	1.24223	0.951066	0.0140594	0.143705	0.238518	0.422727	0.773399	0.0454343	0.655559	0.308634	0.755268	2.86673	0.278193	2.10093	1.04394	0.100064	0.523793	0.217668	0.282548	0.579116	0.130155	1.28911	0.255727	0.310675	1.06712	0.139	0.798479	0.0596778	2.33767	0.8483	1.05599	0.785348	0.0236892	1.61217	0.237056	0.0197604	0.431291	0.456783	0.243468	0.186309	0.368907	0.0974907	1.20607	0.200783	0.213508	0.684556	0.409538	1.23325	0.281784
ENSG00000122507.19	1.70973	1.4555	0.870815	2.02005	1.57506	1.04608	1.55348	2.39874	1.21489	1.22337	1.79221	2.24264	2.75377	1.4381	1.12005	1.05494	0.486329	1.3376	0.605072	0.709758	1.91891	1.98686	1.99543	1.59115	2.55769	1.41659	0.554502	2.25516	0.651329	2.85885	0.663597	1.71279	1.90433	1.74519	2.56497	1.95307	2.37011	2.27242	1.36053	2.98722	1.51545	1.84247	0.81678	0.852596	0.513083	0.698836	2.08722	1.91821	2.05506
ENSG00000135744.7	4.37498	14.4676	10.0452	18.3073	13.1559	4.87903	13.1355	20.9971	19.0294	19.3414	8.04866	20.7045	0.21404	3.24362	12.0168	3.94019	22.653	17.2754	63.0128	3.55986	7.29047	10.1644	10.5877	13.0838	12.8222	9.41124	6.28356	22.2711	31.8567	3.21186	10.4354	11.8152	9.00095	17.2722	0.466836	11.1082	27.234	14.1045	5.52261	9.49765	34.7754	18.2784	27.3391	6.61829	1.51048	11.2952	21.3026	39.5747	13.4076
ENSG00000113163.14	4.57449	4.3463	3.75146	5.11862	6.24001	5.1807	3.53926	6.75999	4.31623	5.02935	4.05196	4.16669	7.79871	4.36319	3.00596	2.61129	0.933097	5.16151	1.97819	3.95487	6.25017	3.73813	3.06701	4.08621	2.81421	4.81911	3.158	3.49287	2.36859	4.43778	4.01786	3.3642	5.0201	2.31427	6.48844	6.10738	4.15386	3.97487	4.81926	2.48734	4.77513	6.23972	3.21303	1.82195	4.59204	6.91703	5.97449	4.35308	4.22021
ENSG00000175283.7	7.4487	7.46011	9.40489	13.862	8.92208	7.61416	8.57593	10.0274	9.69176	7.61973	12.4358	10.288	6.90291	13.2263	6.8143	9.36136	15.1361	12.3472	10.807	8.73192	10.2636	7.88616	6.65075	10.5497	14.2768	7.63771	9.0666	15.2457	14.632	12.8059	9.1474	6.2219	10.3755	9.0373	7.28609	8.96351	10.1673	12.9718	10.5071	6.71159	10.7177	9.75419	13.7628	8.47481	6.53715	9.3026	10.5044	12.4038	10.4568
ENSG00000105258.7	19.0645	12.9445	15.8061	17.6685	16.5291	15.1541	27.1652	13.4639	13.37	18.5062	15.0996	28.0818	26.9883	19.9789	43.1243	44.8373	148.5	20.7921	72.2555	18.5539	18.9971	19.9471	24.678	23.4847	34.6908	11.9978	32.4081	21.5098	27.1665	14.6954	16.5122	15.869	14.2687	41.6554	15.6922	10.4562	17.2723	15.6484	16.9284	33.3611	16.9656	13.6986	44.1123	90.9584	9.53428	15.228	12.6494	21.0494	13.9465
ENSG00000185436.10	1.36213	4.85452	3.40402	5.16341	2.35177	2.55095	2.42548	0.866472	5.95662	3.73469	3.08762	4.31383	3.59634	4.90473	0.626422	1.54324	2.07286	2.89951	1.93281	1.551	1.71998	2.20536	3.26432	2.71068	5.10985	3.06577	3.75824	1.9051	2.66592	3.34108	3.66857	2.79276	2.61735	4.045	2.19319	3.15815	3.72633	7.97649	4.27045	2.48887	3.33607	2.16053	5.5743	2.24752	6.79498	6.77138	6.27176	4.79288	4.43929
ENSG00000152767.14	3.91181	3.40779	0.493021	3.54751	3.85202	1.71687	3.37459	4.24054	2.89534	5.18799	3.39647	3.53757	1.58185	5.71063	2.78112	2.15954	2.6531	7.18253	2.56449	1.44817	1.16459	3.80979	1.32018	3.16858	2.84014	1.38558	0.148838	1.87331	3.54132	1.49872	1.71191	4.68525	2.0641	2.64288	1.21122	2.9397	6.30107	4.88247	3.01136	1.1964	5.18431	3.7122	5.22094	0.181183	0.578787	7.09774	4.00113	5.18614	3.30211
ENSG00000143740.13	3.43545	2.73751	3.38848	3.71951	6.13747	3.92784	1.80308	3.31536	3.80986	5.58841	5.4683	8.06144	3.1653	4.25484	4.10303	4.18392	5.19908	3.33474	4.51353	3.19744	4.27939	3.56657	3.02259	3.3071	3.25623	3.10718	2.99637	3.72442	4.07092	2.96567	3.67279	4.93721	4.60719	5.35136	3.31661	3.01256	3.29899	6.90011	3.61041	3.83981	3.35061	3.99167	5.09889	6.20024	2.03743	2.84113	5.03718	4.19224	3.60345
ENSG00000116266.9	13.783	6.76624	7.75428	12.6818	9.69789	9.31818	11.2766	14.7867	7.7454	8.40498	9.14895	6.25748	10.503	7.77183	8.4605	5.21055	1.70634	9.63327	3.11411	6.58057	7.51423	18.012	8.88189	5.88178	8.62237	9.06362	7.49407	5.90933	12.5775	7.33034	9.05901	7.65171	8.66113	4.95108	9.50771	10.3889	8.84297	11.8707	7.71297	12.5283	10.6211	5.732	3.25553	4.43358	9.41851	8.72935	7.80726	7.76702	10.8115
ENSG00000135446.15	43.8601	51.2716	41.2947	55.313	25.1612	37.1477	26.5447	22.9926	29.4235	23.4133	20.7076	48.9545	31.544	60.3571	51.1015	50.3226	50.5571	35.284	72.0547	29.818	42.5657	44.5712	26.4299	52.5586	40.8116	37.2415	44.2909	40.6739	80.8222	13.2076	72.1334	23.2744	19.9321	49.963	32.5705	28.4468	39.6731	38.0922	45.3071	48.3456	53.6541	30.2624	39.8294	41.1925	6.24654	41.581	26.6001	43.2937	26.0264
ENSG00000145681.9	0.122632	0.225047	0.268141	0.220196	0.179527	0.0441012	0.519737	0.533245	0.606441	0.319784	0.241244	0.436149	0.137281	0.215457	0.261974	0.270115	0.00698587	0.244362	0.442155	0.054375	0.534652	1.75211	0.138221	0.203031	0.250488	0.149544	0.163082	0.206623	0.260524	0.0414841	0.10615	0.207715	0.0382294	0.11058	0.208668	0.382669	0.0835214	0.364554	0.708878	0.844285	0.35179	0.137826	0.255581	0.00654587	0.180569	0.325336	0.228068	0.403702	0.777943
ENSG00000163932.12	19.3902	16.7913	22.096	18.0411	26.0398	19.9634	23.6755	30.849	26.0801	21.8588	17.427	31.3527	24.6612	29.317	17.2991	18.8714	24.5115	18.5365	24.5095	20.1451	24.0731	13.2778	14.7787	18.6292	28.2671	21.5698	15.3423	44.1337	29.6331	38.5665	21.4665	21.7517	9.13321	16.0186	15.4618	18.5028	30.3583	26.2338	22.1344	9.2439	31.8159	23.9641	41.9072	20.3665	71.7903	25.6181	22.6794	19.6036	26.3112
ENSG00000054267.19	3.41744	3.4495	3.08124	2.94311	6.78387	3.51496	2.29237	4.39454	3.35315	5.43104	6.82671	5.54497	2.68273	5.20716	3.9902	1.45707	0.368633	4.47088	0.894038	3.30693	3.65553	3.52049	2.5528	1.88972	1.75058	3.61595	2.07636	3.35169	4.06848	3.58652	3.6153	4.90747	3.1373	1.03813	4.00151	4.64391	3.72203	3.17585	3.23629	1.88493	3.36376	4.83058	1.77433	1.25418	2.4469	3.23089	5.64457	3.05716	3.86474
ENSG00000155229.19	8.44667	12.2079	13.7074	10.5807	18.5351	9.68976	10.2335	11.8391	12.642	11.5438	10.1784	11.8971	9.39864	13.5377	10.6912	14.3998	11.3986	9.6727	12.2586	11.4055	13.7841	8.43311	14.536	12.4129	12.0881	11.3564	8.96253	13.032	10.8272	7.13515	14.6541	9.53757	10.428	11.2221	13.2918	11.1877	9.27973	10.4945	10.9955	5.32378	16.2642	13.8489	11.1839	10.3537	5.85945	6.43617	17.983	12.1754	10.7714
ENSG00000162490.6	0.0193536	0.0937635	0.0273437	0.0399267	0.193046	0.17748	0.0450555	0.0915195	0.0328863	0.117907	0.034531	1.48809	0.101886	0.15018	0.0324393	0.0834046	0.0859948	0.126212	0.10467	0.00643603	0.0678036	0.127622	0.0598322	0.0627763	0.0185304	0.0875377	0.139199	0.0281873	0.0212001	0.309343	0.0325993	0.116783	0.0987267	0.0232687	0.131726	0.0823529	0.0191727	0.0837618	0.247163	0.0575152	0.00960905	0.155133	0.0434381	0.0495868	0.0244261	0.0214305	0.00928859	0.121207	0.092525
ENSG00000214174.7	2.46288	1.90978	1.26443	1.27552	1.20697	1.28715	2.66609	1.17777	0.895928	0.770463	1.43639	1.84737	1.01014	2.20672	1.16995	1.37636	0.604587	1.17156	1.76881	1.10906	1.96239	2.61034	2.35685	2.22629	3.65539	1.15205	1.29625	1.40808	2.46606	1.43983	1.14316	1.76137	1.35976	1.05226	0.851466	1.29628	1.84815	1.36292	1.14436	5.72761	1.21367	2.74288	0.768023	0.849761	0.504962	1.4129	1.91013	1.2871	1.26712
ENSG00000274391.3	0	0	0	0	0	0	0	0	0	0	0	0.306079	0	0	0	0	0	0	0	0	0	0	0	0	0	0	0	0	0	0	0	0	0	0	0	0	0	0	0	0	0	0	0	0	0	0	0	0	0
ENSG00000166669.12	0.0481987	0.303728	1.4727	1.41248	1.74533	0.372	1.74884	2.18371	0.988627	1.97744	2.17079	1.91013	1.55474	2.0682	2.5684	0.0575206	0.882001	2.01589	1.26326	1.14295	1.90682	1.58523	1.5302	2.42628	1.18851	1.1216	0.377498	0.878594	0.101903	0.282197	1.31147	2.24312	0.605223	0.768939	3.07601	1.47668	2.82908	1.89055	1.21414	0.323937	0.0736328	1.3048	0.962916	1.00456	1.28749	1.34249	0.480446	1.67987	0.887621
ENSG00000176532.3	62.1552	13.8692	29.1151	96.2052	34.6963	20.0533	34.2718	80.6253	45.7456	95.7835	88.7916	11.3709	22.2148	116.901	35.1148	60.7126	42.8811	48.5036	45.5835	68.8313	11.9118	57.8144	50.9354	115.187	102.856	40.9279	48.8834	12.973	107.27	45.7159	20.4999	25.8678	15.1977	84.776	5.70452	39.3644	172.26	107.811	78.1075	65.4865	69.4365	45.5144	69.7347	34.9883	87.5185	43.0606	116.845	41.4595	70.0898
ENSG00000243147.6	36.8901	18.1056	22.188	17.9568	15.0045	17.6656	14.194	17.6545	16.3856	17.0374	20.172	25.2829	14.8916	22.0057	18.0435	15.7386	5.08355	30.9001	8.05629	17.265	20.2816	29.2008	12.7446	21.1812	13.8336	16.7258	20.483	17.8549	17.396	13.5938	14.4452	15.7694	17.2162	11.1622	16.4636	17.4401	16.3927	15.2293	22.4777	43.8704	19.8295	16.2789	10.5151	16.6866	8.56114	16.3285	15.1409	14.4415	11.9583
ENSG00000185414.18	28.5602	11.0556	12.1197	19.522	9.18065	14.4294	19.8636	16.7192	12.376	11.2894	13.904	11.7483	15.2288	14.2146	16.4216	10.8246	6.18739	22.7283	8.19186	13.3452	13.6466	19.6189	15.1666	12.8994	18.7606	13.3463	12.9065	14.929	15.2864	11.1024	18.9922	6.3568	8.60052	14.8636	17.0205	13.4228	11.7429	11.2853	14.5089	18.7489	21.1667	12.0843	8.44694	8.83008	6.35087	13.574	13.044	13.2823	10.915
ENSG00000137876.8	71.4165	32.1443	32.7864	26.9139	37.5978	42.8892	47.9074	39.239	25.0803	37.787	28.9156	39.5942	54.2593	55.1344	34.6504	30.9637	13.5494	51.9322	15.8113	33.4284	40.6877	66.9171	38.1428	35.6134	35.6303	31.6604	72.3576	25.417	67.0298	16.9623	47.7451	28.9834	27.0672	25.5205	44.1339	35.8006	31.0038	17.9828	44.7476	105.915	33.4603	21.72	18.4977	35.1523	15.5641	20.5419	26.2879	20.008	21.4678
ENSG00000112936.17	0.149711	17.2278	0.021976	0.230863	1.97759	0.660758	2.17893	0.164228	0.217036	0.192215	1.1133	17.366	0.0444723	1.26336	0.552868	0.273714	0.204683	0.14423	0.496853	1.16772	7.92155	0.225819	0.515433	0.160031	0.203288	0.952363	0.104008	2.1035	0.173483	0.70442	0.336234	2.84415	11.0946	0.384539	2.72541	12.5904	3.07747	5.55842	0.81967	0.493451	0.193713	25.639	0.340383	0.366147	0.765618	0.286344	1.57749	1.69163	3.70881
ENSG00000132842.12	11.9805	11.8838	8.96578	14.9615	14.4803	12.9569	10.2257	19.2503	10.9695	20.0675	10.4957	6.74915	11.4392	12.3982	11.0952	8.08539	3.74258	13.9728	4.75965	8.65704	11.7469	11.3729	6.396	9.60871	5.59768	11.5446	8.981	6.48669	5.45203	7.45587	10.2866	8.96863	7.93703	6.96237	7.61156	13.2662	9.80936	7.50427	9.5012	5.05737	9.70787	11.4547	7.12775	6.55277	10.8706	17.3823	11.5372	12.492	9.41251
ENSG00000185338.4	0.270803	11.3136	9.53384	4.15012	2.21162	10.0952	5.09196	1.30581	7.63052	4.96546	2.0548	8.62885	14.2211	0.83262	1.73933	6.50202	10.9088	4.74614	25.7349	0.868391	9.43312	4.61658	2.33219	4.21157	1.77795	2.34679	7.21266	3.74853	1.81452	2.4734	2.8346	3.83331	3.31541	8.44194	4.49012	1.90955	6.20857	1.91786	5.64786	3.75945	0.998797	4.88771	6.77265	14.5706	3.34804	1.3012	1.40646	4.47292	3.8626
ENSG00000184557.4	6.9075	62.0902	12.7103	13.3026	28.4122	31.6067	13.2141	8.54729	39.362	23.5299	9.52082	32.119	12.7911	5.14677	5.37325	23.1122	12.9394	22.4596	26.1904	11.007	28.3475	14.2694	7.52574	21.1159	1.7028	26.7166	7.28158	14.3989	5.98109	10.1061	15.8978	25.8129	66.9805	9.06551	10.8044	46.3496	22.4091	11.8941	33.4009	9.07138	9.38076	66.7783	20.1082	11.2584	6.46931	9.02595	18.1504	14.0415	25.5682
ENSG00000182179.9	7.55954	11.1411	7.1154	5.99438	8.41513	11.0018	6.14508	11.7623	13.4356	7.95633	7.7235	16.0998	3.19699	6.38434	11.026	19.3221	18.3255	7.43303	16.7273	7.01644	18.4695	8.69009	10.0272	11.402	5.11553	13.7824	4.21846	14.7771	7.6848	35.4276	6.82771	10.1381	11.372	5.85756	11.3849	10.573	16.6873	13.5506	10.2857	4.43423	13.1599	16.9706	13.831	13.4145	20.6196	9.11406	7.94186	14.4405	14.3277
ENSG00000162877.11	0.0453237	0.0638786	0.0658651	0.099737	0.105263	0.0220042	0.00973979	0.0709498	0.0568731	0.00753064	0.0373234	0.847435	0.00987328	0.0477785	0.00536251	0	0.0371796	0.00738932	0	0.0180869	0.0635151	0.0115694	0	0.0330782	0	0.00723538	0.00611224	0.0792135	0.032497	0.0275979	0	0.00863657	0.0554894	0	0.0779335	0.0617153	0.020205	0.0213993	0.0219345	0	0.00900128	0.269881	0.0174388	0.0348378	0.0490311	0	0.0195775	0.00655045	0.0900065
ENSG00000130653.14	0.280277	0.334761	0.198473	0.274407	0.398876	0.791828	0.219481	0.799408	1.09346	0.763646	0.696323	2.87703	0.703687	0.50286	0.542382	1.59683	0.837822	0.19943	0.462454	0.703783	0.675697	0.533545	1.16204	0.520047	0.644053	0.348842	0.0416412	0.982869	0.837322	5.56459	0.150032	0.273827	0.891776	0.0899551	0.319075	0.369916	0.750026	0.448578	0.375501	0.127057	0.254728	1.98369	0.70827	0.251034	1.82949	0.660819	0.630973	0.406789	0.993161
ENSG00000084463.6	25.0773	30.3954	21.6982	17.8305	18.219	23.6136	31.3661	14.974	17.8386	17.6369	16.2306	26.9323	38.701	20.1145	22.9952	18.7823	8.32904	22.641	19.5843	17.3861	21.3666	18.0202	20.1364	18.4701	15.5051	25.3684	22.6269	16.1953	34.4636	12.6094	35.0051	20.397	18.694	15.4932	26.653	20.3704	20.2122	20.9788	23.3698	12.234	34.526	19.2529	15.1121	13.2187	10.2293	27.4686	19.4688	19.0977	16.8705
ENSG00000197006.12	15.8204	11.5799	12.2776	12.1416	11.5382	10.6644	13.2167	17.093	11.1209	9.16399	17.5573	12.2462	10.6023	18.5756	9.47061	11.7922	6.37555	16.3641	11.203	10.6722	11.9512	20.0412	12.9797	10.3735	11.5749	10.8291	17.9238	15.0214	11.9059	16.2894	11.7042	13.0674	10.5943	10.6362	14.8952	11.9044	13.5012	12.5181	10.128	34.4912	12.957	11.6068	10.4713	11.4561	10.5376	11.1498	11.5299	12.6931	12.7867
ENSG00000101574.13	1.3785	0.991836	2.15565	1.25824	1.98199	1.81212	1.44557	1.47424	2.12	2.04279	1.40789	3.29372	1.69082	1.37824	1.69955	1.51995	0.399005	2.13944	0.973895	1.62305	2.01879	1.47936	2.22202	0.835863	1.00833	2.05522	2.01253	1.18951	0.989367	1.48088	2.31846	1.30944	1.45708	0.873472	2.13986	2.32164	1.42097	3.69725	1.3022	2.61299	2.32663	1.78235	0.812314	2.07619	1.71069	1.49205	1.58545	1.18161	0.954517
ENSG00000073146.14	0.110339	0.0577087	0.0709864	0.0569076	0.0677604	0.0390603	0.159309	0.0438558	0.0351546	0.0171872	0.0653073	0.094603	0.00751128	0.0333193	0.0448759	0.0237753	0.141425	0.0281078	0.0979036	0.0103199	0.101473	0.0044008	0.0439719	0.0713005	0.0118851	0.0963278	0.011625	0.15952	0.0123613	0.257196	0.011616	0.124838	0.239216	0.0808394	0.0333503	0.143788	0.0794186	0.127526	0.0889975	0.0553342	0.00342395	0.0894971	0.0530677	0	0	0.00859077	0.0670226	0.0523255	0.0836905
ENSG00000207031.1	0	1.94808	2.29562	0	0.846636	0.25564	0.678928	1.85463	0.991108	0.262468	0.520338	0.963129	0.344117	0	0.934508	1.08923	0	1.28771	2.56302	1.26077	0.885485	0.403231	0.366273	0.384296	0.725997	2.26959	0.426064	0.162403	1.3214	2.4047	1.33042	0.903039	0	0	0.33953	0	0.93895	0.497224	0.764489	0.563343	0.627449	2.17067	0.607802	0.607107	0	2.09905	1.59213	0.45661	0
ENSG00000108342.11	0.3629	27.1528	0.348996	0.381674	0.0762735	0.397279	0.0573419	0.407266	4.64582	2.53601	0.562528	1.24729	0.290639	0.131269	0.0820851	1.10395	2.8018	0.974485	0.519532	0.127781	0.0448725	0.830983	1.02705	2.50571	0.0735808	0.971223	0.0143941	0.641932	0.0382644	0.0324959	0.368561	0.569484	0.762271	0.173242	0.0114706	0.0454178	0.49168	0.0335962	1.48077	1.04675	0.604132	5.35335	0.985625	1.66134	0.600424	0.150692	2.12847	0.87157	0.0471025
ENSG00000184144.8	0.0235212	0.118098	0	0.00323497	0.0357177	0	0.0429637	0.00460251	0.0110681	0.00781619	0.129775	1.01103	0	0.0392589	0.00278293	0.0081092	0	0.00383476	0	0.00469317	0.0131847	0	0	0.00286105	0	0.0262841	0.001586	0.0302269	0.0379454	0	0	0.0425793	0.746316	0.00424191	0.0101111	0.0660573	0.0332044	0.0629303	0.0151775	0	0.0046713	0.0161605	0	0.00903972	0.0229007	0.0019534	0.0253998	0.0288951	0.0285448
ENSG00000198752.8	14.1909	17.7748	15.4618	19.0178	21.0755	31.5591	12.7459	24.8783	24.8392	25.4659	18.3897	13.319	10.6796	10.7373	16.6034	15.8498	9.27542	16.5754	20.2058	12.5565	15.7558	14.6689	13.5972	24.5485	12.7195	27.3979	11.7391	8.53903	16.1611	18.3525	9.79756	17.2994	25.4143	10.8255	22.2265	21.3134	13.1011	29.7964	19.5949	3.21738	25.1969	19.9006	16.1937	7.95312	27.7207	14.7379	28.7366	24.0943	18.8656
ENSG00000175198.13	37.8179	4.27864	4.80811	8.33342	48.022	7.21124	3.87405	58.9921	4.87845	14.1824	6.01412	7.07793	1.87784	17.1152	29.9774	7.94945	6.69334	7.55287	6.08983	3.63155	14.3079	6.53266	4.71864	9.99505	7.95438	7.49973	1.7606	2.89357	2.20937	9.35809	24.7424	10.1045	3.36905	6.36389	6.13201	6.49635	6.57881	8.91655	2.53343	8.64732	3.50023	9.47391	6.37498	82.6914	7.4811	24.4587	25.8656	6.65104	6.47299
ENSG00000152253.7	11.4679	5.3513	7.12315	8.99253	5.31159	7.74835	5.94661	7.95847	5.33979	5.3463	10.1326	8.44895	7.33187	6.70483	7.73596	7.67666	2.95627	13.3248	2.87139	4.18603	4.72563	9.74128	5.65525	7.71827	8.05952	5.04423	7.61986	5.39874	12.9889	4.87862	11.4361	5.71451	2.60001	7.14924	10.0421	6.3202	6.25414	5.45906	10.7967	7.94065	8.2308	5.90519	4.40747	5.76274	1.72653	11.3946	5.52247	6.84543	2.86837
ENSG00000118971.6	19.6131	34.83	16.2701	28.2086	19.4802	31.5014	137.427	24.1643	38.0546	260.612	22.6589	24.0681	3.71787	19.3497	35.8363	77.2005	15.0867	40.5179	42.6917	36.8218	5.33091	15.6768	30.7445	43.9441	46.8533	33.8177	50.0887	27.4307	68.7398	10.4578	48.534	19.7023	39.6553	23.0891	6.9168	14.5557	24.6528	31.9327	19.633	7.40288	30.338	19.201	30.6236	18.2527	5.12526	4.47353	14.1078	37.1981	17.0651
ENSG00000160194.16	8.31294	5.84557	6.00135	4.4428	8.77993	7.64503	8.04121	6.19305	4.58651	6.63615	5.93837	5.40384	4.53941	1.70592	6.92817	10.815	10.7526	4.01839	7.43762	9.56385	8.78158	6.36781	8.01384	6.41856	8.45281	5.86625	4.94053	6.4539	11.3954	6.55464	6.25578	6.67495	6.3209	5.65058	4.34246	6.34363	5.96277	6.35929	8.01538	6.83203	8.00628	5.98974	7.41432	7.81489	3.47839	6.41996	6.04642	6.25815	6.5056
ENSG00000180999.9	0.0412091	0.120999	0.0166349	0.0188922	1.25155	0.0889183	0.191871	0.0806359	0.118502	0.422231	0.147052	0.0697919	0.239385	1.36357	0.178775	0.236789	0.591575	0.04479	0	0.178153	0.0192497	0.525953	0.0955495	0.0501255	0.694432	0.0219284	0.0277868	0.0353051	0.139527	0.0418208	0.104119	0.418801	0	0	0.0147622	0.105211	0.193914	0.281039	0.299148	1.32263	0.777492	0.0419454	0.0792785	0.105584	0.0445799	0.182526	0.138446	0.942999	0.0757736
ENSG00000175920.14	0.382087	0.626532	0.249152	0.800377	1.14467	0.932252	0.334748	0.776404	0.968119	1.13784	0.198467	0.734711	1.27411	3.04151	0.316448	3.42495	1.22961	0.0191671	0.500715	3.37205	0.980272	0.375122	2.024	0.843716	1.07387	0.534883	0.360691	0.117844	0.309077	1.36014	0.618836	0.677672	0.917578	0.159016	0.328496	0.245127	0.104819	0.157271	0.436201	0.492628	1.4009	0.278223	0.66721	0.112957	0.273441	0.624872	0.952161	0.722126	0.136189
ENSG00000126803.9	0.9926	4.40064	0.755006	1.60773	48.8644	1.80546	4.05894	2.78098	3.88586	1.85708	3.14121	10.1156	9.39962	2.77084	6.83289	2.3686	3.80203	1.47785	3.89312	0.949345	5.9031	2.88446	2.96246	2.39977	3.47321	2.53399	0.53931	63.2015	1.21066	1.34866	31.342	3.23184	14.7091	2.0416	1.64858	5.01606	2.41665	3.76016	2.73599	1.57243	5.15226	3.50695	2.40669	28.4453	1.30896	1.4443	2.07289	2.97583	3.92784
ENSG00000163902.10	98.0397	89.1047	99.7	91.0812	83.126	108.429	86.1437	92.0519	108.115	82.3105	74.9078	76.1854	108.459	93.5602	86.5496	112.163	127.851	87.4335	124.596	102.067	111.994	78.7573	88.3019	105.621	125.383	89.2174	134.559	138.398	103.673	109.052	111.594	115.148	82.5834	171.05	101.266	77.727	96.4146	91.4031	90.5676	98.9483	92.3845	83.9786	109.258	155.168	81.6906	128.734	101.928	96.1146	88.3402
ENSG00000080986.11	3.27126	2.42931	6.51222	4.65299	6.31449	5.86907	3.56437	4.40474	5.25494	8.35523	3.51228	9.19654	9.84317	2.14515	5.17873	4.59518	0.620919	5.03281	1.97566	3.83486	5.25757	4.51115	5.67723	5.24404	2.56368	5.49011	5.21928	2.68642	5.53336	3.15616	8.34281	3.41775	2.09516	2.26722	7.26453	4.92934	3.16406	8.20419	4.48075	2.75803	6.05227	3.32636	1.19028	3.88296	0.932773	6.08943	3.21742	3.07736	1.27805
ENSG00000115271.9	12.9923	5.40607	4.24476	12.3543	7.95454	5.82935	8.75528	9.24403	6.27389	5.14692	11.3806	6.29556	7.25519	7.78309	7.47172	6.61072	3.34214	10.6437	3.48883	6.13569	8.21079	10.7383	10.174	5.84467	11.4576	5.01739	5.80838	7.65255	10.4793	8.95854	8.83433	5.8843	4.07093	6.57789	5.19164	8.04638	7.82245	6.351	6.84368	13.8837	8.74645	9.98249	4.9641	7.60541	3.28814	5.3332	5.76842	6.38837	7.99097
ENSG00000179918.16	115.281	42.0392	32.3173	37.4308	51.7656	26.7791	44.2228	81.4444	56.1432	29.5701	54.1704	34.8384	65.8725	43.9647	41.9924	60.6206	39.6407	52.7604	53.501	30.534	40.0915	56.3354	32.6717	42.3238	64.5351	37.1667	46.3226	36.5503	53.196	33.5111	23.0463	46.6741	22.8387	64.7109	30.2163	35.7303	80.4489	102.198	47.582	70.5393	47.0679	33.7599	71.9248	38.1435	46.6045	227.742	81.0262	51.6036	65.0012
ENSG00000086475.13	16.8451	14.2907	13.9195	13.1094	17.9431	12.5305	22.9911	21.6981	16.2795	17.2194	26.4084	17.1235	16.781	21.0511	18.4955	17.2083	18.1351	21.904	17.2549	9.8194	14.8349	18.0225	13.9825	15.9234	22.3723	15.8438	16.8034	17.5122	27.5801	9.05472	17.3231	13.9474	10.3029	19.2122	15.1819	15.1086	15.4997	28.7409	17.3327	15.5071	21.853	18.7356	16.4261	15.9038	6.56	24.3603	11.991	18.999	12.9028
ENSG00000136697.11	0	0	0.0179682	0	0	0.0360169	0	0	0	0.0246526	0.0122183	0	0	0	0	0	0	0	0	0	0	0	0	0.0180477	0	0	0	0	0	0	0	0	0	0	0	0	0	0	0	0.0264563	0	0	0.0285442	0	0	0	0	0	0
ENSG00000009724.15	0.0111481	0.0834696	0.411764	0.130326	0.0946018	0.0811842	0.113794	0.32721	0.196718	0.0926139	0.224917	0.498443	0.20035	0.112622	0.178064	0.153737	0.228622	0.0772446	0.203486	0.0611702	0.12498	0.149398	0.142167	0.0949213	0.108874	0.240253	0.00751701	0.0659011	0.103245	0.576991	0.248807	0.164633	0.19904	0.0603147	0.113816	0.203979	0.269194	0.456169	0.139374	0.039756	0.193726	0.246803	0.150127	0.0428446	0.10854	0.314783	0.220705	0.193342	0.227535
ENSG00000112343.10	1.98614	3.32165	2.80459	1.8834	3.84507	3.47897	3.24029	3.64502	3.18243	5.04622	3.80594	3.77557	3.17503	3.45414	2.29929	2.19136	0.913745	3.66491	1.81751	1.25066	5.04805	2.0787	3.92519	3.18749	1.68041	2.84714	2.09456	3.40317	2.35989	8.23109	4.33342	3.65753	3.75477	1.598	3.15435	3.42768	3.18889	5.08686	3.35423	2.67517	1.19984	5.10788	1.93227	0.759448	4.21006	2.77419	2.44651	2.78317	3.23267
ENSG00000152503.8	0.689965	0.696541	1.77438	2.36701	1.09067	1.50862	0.483124	2.98461	2.86668	1.60366	1.50981	1.8552	2.00965	1.20882	1.70605	0.54791	0.453106	1.71576	0.660357	1.5391	0.401966	0.237466	0.399946	0.773244	0.0356289	2.05747	2.32356	0.448316	0.655434	1.16832	1.97832	0.487491	0.846299	0.0768956	0.679005	2.15081	2.01598	0.158611	0.52525	0.850129	0.53887	1.93229	1.39447	0.320288	4.45325	3.88228	0.708794	0.997178	1.68919
ENSG00000117707.14	14.3079	5.55473	3.48727	2.86541	4.48068	3.18906	9.02842	9.42062	7.35588	4.32596	1.73315	5.57186	7.66053	14.777	10.9685	3.71494	0.484413	9.48043	1.00118	3.25414	2.70019	14.962	2.83689	1.83367	1.44541	4.23473	1.19365	0.972728	5.46618	9.06205	5.59481	5.37596	1.41887	0.947707	4.48086	2.80302	8.31362	1.91722	4.56398	1.19729	13.8177	8.71017	2.55804	1.23421	0.86134	3.56189	12.8913	5.72105	9.90276
ENSG00000164406.7	0.374395	0.364506	0.763615	0.284562	0.228821	0.286997	1.37621	0.491611	0.455889	0.450179	0.827565	0.610716	0.279013	1.16844	0.606167	0.475546	0.505132	0.361416	0.639424	1.10088	0.193297	0.502991	0.993734	0.743025	0.486765	0.802143	0.305597	0.101291	0.812384	1.13986	0.365104	0.610162	0.190987	0.0710735	0.328236	0.360547	0.329413	0.372142	0.492706	0.614875	0.303289	0.676925	0.720264	0.246125	0.479628	0.72823	0.58162	0.427182	0.402183
ENSG00000005339.11	3.86534	8.25723	7.61371	5.15828	9.82722	7.71221	4.63136	6.60498	6.32187	6.78422	7.26351	11.1922	6.70397	7.5537	5.19939	5.36734	3.37008	7.09917	6.29572	3.78565	6.05142	4.33725	5.6589	5.20092	5.2054	7.40565	3.57127	8.30662	4.21691	12.1966	7.07368	8.48622	7.52778	4.70494	9.00934	8.12214	11.3532	14.0537	6.91404	1.1945	8.59318	9.24976	8.83084	3.46303	5.56458	7.78106	14.6335	8.86713	8.99733
ENSG00000168758.9	5.18778	11.0481	1.64053	5.91759	6.03316	6.37439	8.39425	4.72919	7.10191	4.81497	5.93272	11.1807	5.12654	10.6934	4.74236	4.1463	10.568	8.17238	5.30754	3.25202	10.0151	2.22507	6.6345	11.0336	6.01804	6.99457	4.68397	7.43634	3.21926	7.09457	4.40807	8.53612	13.0985	6.44083	5.66619	7.15634	7.4716	13.3825	11.8051	1.76359	8.117	10.7382	7.05581	5.28027	1.85267	2.04552	6.31139	6.94148	5.17573
ENSG00000053918.14	37.2107	32.0154	51.3566	43.7092	18.0371	15.3539	48.6628	43.9429	68.0529	40.7235	16.1172	6.02107	17.1062	59.0235	35.6424	77.7216	73.8634	45.5385	73.2892	56.7563	11.6149	45.2683	16.914	33.3948	46.9357	53.925	41.2371	1.49071	29.4423	4.65982	35.5352	48.2106	36.0401	44.5408	8.83668	12.5533	54.5804	22.4962	55.3297	5.96894	88.998	33.6907	89.1614	35.3624	10.154	68.9866	37.6438	110.503	47.9718
ENSG00000138380.16	0.765513	0.456793	0.591448	0.388684	0.651937	0.333019	0.657427	1.31269	0.482012	0.321398	1.29693	1.04833	0.239081	1.13526	0.433384	0.283784	0.0618956	1.1228	0.300493	0.465345	0.607515	0.693374	0.610738	0.550679	0.952052	0.663586	0.297865	0.657248	1.11151	1.04001	0.549975	0.935873	0.481482	0.118758	0.563197	0.793917	1.20277	0.993181	0.657287	0.973586	0.741082	1.14575	0.427559	0.089632	0.261203	0.902353	1.26813	0.497666	0.65385
ENSG00000269404.5	0.0276749	0.819096	0.087138	1.26367	0.385644	0.0985298	0.731501	0.0703987	3.2817	0.487414	0.665464	10.4558	0.102487	0.0680722	20.6941	1.98458	0.261073	0.0857272	0.561279	0.0496977	2.3192	0.113029	0.38501	1.87166	0.0254379	0.481558	0.149287	0.0853556	0.291028	0.412859	0.139847	0.859585	0.169411	0.229586	0.184398	1.05043	0.213846	0.278752	1.16522	0.0888242	0.0219849	3.61272	0.266206	0.563712	1.68255	0.151692	0.0956328	0.283981	0.537371
ENSG00000071073.11	3.26517	6.91192	4.19552	6.97805	4.02877	9.9628	6.66502	7.4628	12.1148	4.23546	5.91864	7.66352	11.7895	4.76833	5.20675	6.9434	1.46841	11.1501	4.58111	5.88656	9.21001	5.9888	4.28174	5.60282	5.74465	8.87333	2.27301	2.46388	7.73903	4.43483	8.54616	4.00882	6.28848	3.39024	4.55351	5.53661	7.2743	6.62771	5.25139	6.73028	10.7507	5.53939	3.02481	2.78967	15.6223	11.6784	7.82778	6.29617	9.39262
ENSG00000143398.18	11.9463	10.6312	10.1668	5.96914	10.3891	8.15873	6.25543	8.65979	8.73638	11.8985	11.0181	15.7834	6.70407	10.9719	10.0678	6.50665	3.24557	10.7031	5.60143	7.73259	9.63917	9.83085	4.76731	8.79863	5.50542	7.95023	6.98217	6.98364	10.2445	5.37886	8.48463	12.9024	6.74034	4.07959	10.3037	9.52497	6.21153	10.884	9.23964	5.80801	8.3539	9.99996	7.26157	4.98715	6.51152	9.92121	8.99161	7.18179	7.27426
ENSG00000135821.15	35.6531	48.1367	7.76791	18.4594	71.8848	33.9009	64.4106	30.8369	40.2425	54.5372	63.5674	29.5513	66.765	41.3567	40.6917	68.2335	17.2488	11.204	16.9092	30.845	105.418	36.7113	55.3272	12.088	18.5438	36.1513	9.95227	50.4755	28.2013	62.66	41.1255	42.3325	60.9859	15.67	43.9234	28.1718	35.8831	52.5107	40.9309	53.3139	46.8946	46.2999	23.2771	46.5766	56.4918	24.803	60.0315	28.5451	61.2708
ENSG00000119866.19	4.25744	2.00461	0.66584	1.4032	1.85422	0.0380653	4.82406	0.886005	1.99	1.86861	1.79171	2.86524	1.49876	2.9135	2.92389	3.27417	1.97173	7.50433	1.71738	0.747993	0.737538	3.11092	3.03372	2.33539	3.14172	1.38464	2.15107	0.745112	3.74896	2.77499	1.83739	1.64719	1.06191	2.70958	1.61465	1.53137	2.33966	2.53579	2.17233	1.2163	3.90647	3.54192	2.32479	1.93229	0.620241	1.70439	2.10612	3.30814	2.84158
ENSG00000130640.12	7.68395	11.8422	10.3343	10.4114	14.6679	10.2802	10.5551	12.6561	12.3277	11.5829	11.0733	10.511	11.0786	9.19484	11.1347	15.3683	18.3023	8.03293	18.8181	10.1229	13.2443	9.02516	10.2715	14.5028	9.49706	12.7383	8.77647	10.6753	12.4601	6.7717	12.6629	6.22401	9.13664	14.0241	15.3146	11.2237	9.16062	9.90071	12.0702	4.49569	13.7379	11.8893	13.6927	13.4641	8.58889	7.44754	9.72713	15.0251	13.6534
ENSG00000198049.6	0.0208493	0	0	0	0.00931188	0	0	0	0	0	0.0257536	0.254235	0	0	0	0	0.0213787	0	0	0	0.0292175	0	0.0120856	0	0	0	0	0.0696626	0.0062287	0	0	0	0.0212713	0	0	0.00887175	0	0	0	0	0	0.0159164	0.0200551	0	0	0	0.00750484	0	0.0230021
ENSG00000138378.16	0.094781	0.535314	0.465875	0.352729	0.418338	0.428573	0.33547	0.245465	0.717096	0.268644	1.10189	2.29451	0.279342	0.137137	0.422178	0.307546	0.0228676	0.372679	0.316609	0.22249	1.37511	0.555036	0.711	0.413683	0.281858	0.422768	0.387217	0.533065	0.293151	0.263102	0.145563	0.3984	0.574509	0.211151	0.892765	1.04861	0.592367	0.65809	0.638573	0.755542	0.138408	1.6046	0.246696	0.139278	0.621235	0.143538	0.381308	0.551961	0.719671
ENSG00000137960.5	15.5245	9.03609	6.79642	10.7044	2.93009	10.8388	12.0602	14.0159	8.69527	4.98444	10.7754	4.21808	7.39249	6.23469	10.5317	7.14523	2.4095	15.12	7.78971	7.58035	4.41294	13.0393	4.31452	10.8092	11.382	10.5587	12.7441	0.260589	10.3484	1.39815	6.11797	7.04612	4.89217	9.72328	0.820411	11.2019	11.9643	11.5029	9.34204	8.27361	17.4412	4.34809	5.58771	9.2258	4.51634	14.1658	6.50481	10.4556	9.38292
ENSG00000177951.16	16.8832	16.0212	19.4219	24.9473	18.5448	17.4976	20.9379	17.7168	22.0953	18.2448	13.4087	18.5753	22.1456	25.5404	18.0801	18.5856	22.1234	16.4942	20.2762	23.6945	25.7799	13.2916	22.8968	20.4244	16.1182	18.5368	16.0559	22.1373	21.2002	18.9584	17.0103	22.5235	18.4249	24.6366	12.2518	15.9739	24.0321	19.1328	17.0468	7.90835	18.815	21.1194	20.2941	18.67	23.9568	19.7091	25.1291	22.5192	23.6548
[truncated: 217 more columns]
