# Supplementary material for: Molecular subtypes based on DNA methylation predict prognosis in colon adenocarcinoma patients
Source: Aging (Albany NY). 2019 Dec 18;11(24):11880–92. doi: 10.18632/aging.102492 (PMC6949097; doi:10.18632/aging.102492)
Supplement: Supplementary Table 10 [file aging-11-102492-s004..xlsx]

## Sheet: S13_Table
		Supplementary Table 10. Calculating differences of each methylation sites among 7 clusters.
	Cluster_p1	Cluster_p2	Cluster_p3	Cluster_p4	Cluster_p5	Cluster_p6	Cluster_p7	Cluster_FC1	Cluster_FC2	Cluster_FC3	Cluster_FC4	Cluster_FC5	Cluster_FC6	Cluster_FC7	Cluster_p1	Cluster_p2	Cluster_p3	Cluster_p4	Cluster_p5	Cluster_p6	Cluster_p7
cg00031162	0.0148751	3.28249e-10	0.0219996	2.29794e-09	0.130123	0.0236808	0.0179429	0.834268	1.34482	0.975533	0.690792	0.866287	1.32864	1.27308	1	1.09307e-07	1	7.76705e-07	1	1	1
cg00076645	0.547632	0.0413246	0.0538269	0.549713	0.370096	0.141535	0.167248	1.16398	1.00745	0.766178	0.810009	1.2753	0.820706	1.97405	1	1	1	1	1	1	1
cg00158308	0.97791	3.15279e-05	0.0128563	0.00135837	0.0833717	0.248781	0.00135583	0.696636	0.949701	0.606706	0.839095	1.80372	1.16617	2.16635	1	0.00841795	1	0.32465	1	1	0.390478
cg00221494	0.407174	1.99065e-08	2.99376e-08	1.18627e-06	7.29976e-09	0.192887	0.00342826	0.665483	1.2331	0.53505	0.437019	2.6316	0.820707	2.13356	1	6.17101e-06	1.0538e-05	0.000365373	2.59142e-06	1	0.966769
cg00336605	0.736736	0.739823	0.862919	0.475765	0.693791	0.120348	0.69718	1.10191	1.03563	0.938192	0.910591	1.04802	1.04905	1.16592	1	1	1	1	1	1	1
cg00371195	0.738337	0.00682299	0.0648612	0.00719234	0.0934826	0.538806	0.0870626	0.995993	1.02181	0.997222	0.962037	1.0142	1.015	1.01752	1	1	1	1	1	1	1
cg00420568	0.998305	1.87884e-08	0.133545	0.0113179	0.693791	0.00726198	0.636791	0.940014	1.27989	0.849959	0.798396	1.03571	0.687192	1.70893	1	5.8432e-06	1	1	1	1	1
cg00461841	0.179548	0.900323	0.00814514	0.693697	0.434191	0.00665243	0.0951794	1.00917	1.01342	0.953779	1.00238	1.0106	1.07958	1.06059	1	1	1	1	1	1	1
cg00520135	0.00292385	0.139578	0.55802	0.000205691	0.504009	0.0955325	0.178192	0.776654	1.05498	1.03855	0.871017	1.02852	1.10403	1.10873	1	1	1	0.0530684	1	1	1
cg00676660	0.455571	0.0410516	0.0422311	0.197179	0.160505	0.0785472	0.185314	0.915337	0.891569	0.633128	0.658858	1.65745	0.890274	2.98781	1	1	1	1	1	1	1
cg01120165	0.847576	0.614353	0.450357	0.0215199	0.769052	0.669099	0.000945352	0.740088	0.796585	0.657207	0.66116	1.09703	1.47282	4.02961	1	1	1	1	1	1	0.276043
cg01182585	0.170514	0.14581	0.694299	0.112629	0.540711	0.705538	0.487213	0.919928	1.10341	1.01359	0.91829	0.916365	1.08221	1.07156	1	1	1	1	1	1	1
cg01222684	0.9947	0.149817	0.208161	0.174337	0.731892	0.099697	0.00594692	0.994213	1.12938	0.928851	0.879728	0.984433	0.822324	1.4381	1	1	1	1	1	1	1
cg01240931	0.255624	0.000263748	0.134698	0.369874	0.0455759	0.28091	0.0278805	0.95715	0.904547	1.02766	0.933968	1.12365	0.907526	1.15777	1	0.0659369	1	1	1	1	1
cg01284306	0.719015	0.417338	0.402162	0.83802	0.655222	0.988255	0.023285	0.906926	1.17952	0.870124	0.898429	1.08851	0.974043	1.30373	1	1	1	1	1	1	1
cg01294695	0.514571	0.00781295	0.948501	0.00200827	0.897964	0.62518	0.243304	0.703627	1.30166	0.805948	0.686008	0.911783	0.911275	2.51155	1	1	1	0.465918	1	1	1
cg01333131	0.671609	1.3925e-09	0.00214032	0.00296242	0.177688	0.00839184	0.126561	0.87503	1.35552	0.827995	0.868748	0.999231	0.808299	1.4939	1	4.52561e-07	0.665641	0.67247	1	1	1
cg01344518	0.0780623	1.63238e-06	0.0700554	1.52546e-06	0.0352717	0.0329359	3.26486e-05	0.854752	1.15482	0.989816	0.798415	0.933173	1.19497	1.29496	1	0.000466862	1	0.000465267	1	1	0.0105455
cg01376672	0.443912	0.0333327	0.663195	0.536293	0.104598	0.365032	0.615662	1.044	1.08628	0.972223	0.994371	0.966127	0.994125	0.952593	1	1	1	1	1	1	1
cg01401376	0.0139042	0.00113905	0.0431066	0.636103	0.434191	0.00705336	4.41179e-05	1.30291	0.731906	0.885378	0.952492	1.09852	1.3995	1.52586	1	0.268817	1	1	1	1	0.0141619
cg01520924	0.374913	1.11022e-15	0.137026	2.83396e-12	0.769052	0.0718604	0.27698	0.731883	1.9025	0.858204	0.421308	0.963568	0.791449	1.74224	1	3.95239e-13	1	1.00605e-09	1	1	1
cg01663968	0.0071326	0.91972	0.129017	0.146004	0.104598	0.603311	0.0601698	1.02878	1.16626	0.675103	0.688816	0.959554	0.922988	3.14908	1	1	1	1	1	1	1
cg01743370	0.981331	0.9553	0.818605	0.0942674	0.144673	0.207762	0.682133	1.07166	0.981514	0.949923	0.88372	0.994018	1.02179	1.45756	1	1	1	1	1	1	1
cg01776246	0.766796	0.117436	0.997758	0.308489	0.943926	0.215522	0.440986	0.947338	1.09527	0.984703	0.929193	1.03944	0.946595	1.02212	1	1	1	1	1	1	1
cg01918888	0.168313	0.163237	0.386803	0.980764	0.340412	0.769479	0.960143	0.898459	1.06568	0.955302	0.995294	1.03433	1.06101	1.01826	1	1	1	1	1	1	1
cg02045085	0.669964	0.173006	0.18329	0.437635	0.616611	0.504061	0.0278805	0.941554	1.07353	0.955285	0.977334	0.957624	1.00894	1.17937	1	1	1	1	1	1	1
cg02154956	0.975082	0.866596	0.978456	0.991191	0.504009	0.463728	0.402268	0.877311	0.870012	0.818208	0.869235	0.856963	0.862555	3.0445	1	1	1	1	1	1	1
cg02196655	0.605832	3.04267e-06	0.394437	1.5241e-09	0.434191	0.0802988	0.776372	0.856141	1.37937	1.04992	0.479434	1.03021	1.40936	1.12365	1	0.000858034	1	5.21241e-07	1	1	1
cg02210123	0.436708	0.464727	0.458684	0.148779	0.144673	0.110773	0.694176	1.10814	1.08145	0.927731	1.01241	1.05561	0.945707	0.917191	1	1	1	1	1	1	1
cg02307482	0.121932	0.300216	0.746339	0.202218	0.434191	0.62518	0.865582	0.924962	0.996418	1.00266	1.0465	0.946121	1.06702	1.00539	1	1	1	1	1	1	1
cg02533993	0.798928	0.0604923	0.439382	0.0425727	0.312359	0.538806	0.561936	0.955935	1.03952	0.921093	0.849641	1.26811	1.00726	1.14809	1	1	1	1	1	1	1
cg02659232	0.99684	0.648402	0.0462963	0.353641	0.434191	0.135974	0.00647667	0.870621	0.985792	0.770318	0.986622	1.08629	0.810196	2.18236	1	1	1	1	1	1	1
cg02676865	0.364526	6.87755e-05	1.40813e-05	3.17747e-09	2.35702e-06	0.276153	8.1235e-13	0.683382	1.24879	0.556934	0.410715	1.80809	0.665139	3.5345	1	0.0179504	0.00482989	1.07081e-06	0.000817885	1	2.88384e-10
cg02691091	0.591143	0.802094	0.306857	0.111047	0.897964	0.596051	0.00671663	1.00451	1.00698	0.999992	0.97962	0.999371	1.00439	1.02584	1	1	1	1	1	1	1
cg02907300	0.174985	0.296112	0.453124	0.656985	0.961206	0.0751408	0.443638	0.950821	1.08421	1.02419	0.964625	0.986891	0.862025	0.96296	1	1	1	1	1	1	1
cg02976574	0.264794	0.509043	0.00342593	0.788715	0.731892	0.276153	0.0661198	1.00127	1.00249	0.996607	0.998304	0.999626	1.00583	1.00665	1	1	1	1	1	1	1
cg03017653	0.635382	0.00190619	0.0105075	0.000234463	0.0741977	0.859548	0.370414	0.878045	1.36066	1.134	0.689612	0.831362	1.11788	0.835431	1	0.432704	1	0.0600226	1	1	1
cg03214697	0.423905	1.29503e-05	9.72112e-05	1.92984e-07	3.90293e-08	0.412656	0.000634909	0.645235	0.921309	0.486893	0.487503	2.64632	1.29623	2.72724	1	0.00356133	0.032663	6.09831e-05	1.37773e-05	1	0.187933
cg03218374	0.976525	5.24291e-05	0.0372962	1.62531e-08	0.838495	0.326374	9.56027e-06	0.949238	1.47997	0.674192	0.601322	0.80292	1.32795	2.73133	1	0.0137364	1	5.29851e-06	1	1	0.00316445
cg03264209	0.0557526	7.95595e-10	0.0439979	1.5241e-09	0.370096	0.00321939	0.271154	0.874411	1.17775	0.947964	0.774463	1.05769	1.34009	1.1277	1	2.61751e-07	1	5.21241e-07	1	1	1
cg03529436	0.2168	0.38249	0.415237	0.118151	0.540711	0.524796	0.243304	0.956678	1.08535	1.01404	0.931133	1.02377	0.903643	0.978105	1	1	1	1	1	1	1
cg03600318	0.063133	2.39808e-14	0.0472445	1.14765e-09	0.0100315	0.326374	0.487213	0.863049	1.48759	1.00876	0.713662	0.823287	1.16482	0.964294	1	8.44125e-12	1	3.95939e-07	1	1	1
cg03693099	0.739936	0.000895139	1.46934e-11	0.0502132	6.71097e-08	0.470337	1.40851e-05	1.0247	1.15243	0.795721	0.880787	1.2539	1.06105	1.28181	1	0.213938	5.20145e-09	1	2.36226e-05	1	0.0046199
cg03712708	0.987951	0.00172835	0.108216	0.070163	0.961206	0.762536	0.254164	0.993055	1.12181	0.952735	0.959181	0.988028	0.958296	1.06048	1	0.394064	1	1	1	1	1
cg03763616	0.377539	6.00731e-07	0.0268094	1.88572e-06	0.058397	0.00792199	0.495606	0.687359	1.2661	0.722941	0.560485	1.49263	2.15512	1.38824	1	0.000177216	1	0.000569487	1	1	1
cg03770548	0.245711	0.0187155	0.656958	0.000129121	0.0833717	0.000814264	0.01282	0.939725	1.07252	1.01792	0.826485	0.951134	1.26774	1.14264	1	1	1	0.0337005	1	0.28255	1
cg03803009	0.142337	2.04895e-08	0.0392876	8.01261e-05	0.058397	0.122845	0.13759	0.873819	1.30518	0.966867	0.796182	0.877904	1.18404	1.15861	1	6.33127e-06	1	0.0214738	1	1	1
cg03804568	0.409935	0.0294619	0.554988	0.0358443	0.943926	0.0121147	0.83082	1.03708	1.08175	0.994205	0.955407	0.97845	0.874078	1.03596	1	1	1	1	1	1	1
cg03812679	0.22128	5.07775e-06	4.40554e-07	0.000255288	4.44036e-05	0.853664	1.8159e-09	0.721516	1.42795	0.616286	0.669617	1.29808	0.917227	2.50684	1	0.00142685	0.000153754	0.0648432	0.0151416	1	6.39198e-07
cg03814826	0.65844	0.0183112	0.980883	0.16459	0.769052	0.215522	0.394773	0.952253	1.13346	1.01087	0.927579	0.957382	0.875489	1.03384	1	1	1	1	1	1	1
cg03860051	0.188155	0.462923	0.409977	0.960847	0.655222	0.545862	0.492801	1.1294	0.957995	0.956889	0.969393	1.00978	1.28576	1.01398	1	1	1	1	1	1	1
cg03944089	0.339379	0.00996057	0.298261	2.66445e-06	0.0833717	0.0485741	0.010665	0.793382	1.0789	0.89886	0.594581	1.29006	1.56829	1.54818	1	1	1	0.000796669	1	1	1
cg03977782	0.776108	0.0276794	0.582452	0.0154324	0.995684	0.776368	0.212801	0.996092	1.06178	0.918291	0.893908	0.981358	1.04584	1.44578	1	1	1	1	1	1	1
cg04032566	0.178017	0.069806	0.428556	0.00292482	0.922798	0.028329	0.000211213	0.987631	1.00766	1.00117	0.989389	1.00088	0.991058	1.0178	1	1	1	0.666858	1	1	0.0650537
cg04126335	0.932463	0.560933	0.105349	0.749284	0.616611	0.076828	0.0516046	1.00175	1.00042	0.99586	1.00652	0.991666	0.999326	1.01334	1	1	1	1	1	1	1
cg04349727	0.676542	0.00417472	0.193869	2.05897e-05	0.177688	0.162457	0.24869	1.01044	1.23922	1.01601	0.699067	0.97287	1.10438	1.12099	1	0.905913	1	0.00584748	1	1	1
cg04411625	0.150833	1.93874e-05	0.193869	0.000286255	0.285951	0.62518	0.815007	0.797646	1.2131	0.857698	0.747961	0.898487	1.42958	1.81525	1	0.00525399	1	0.0721362	1	1	1
cg04432009	0.754236	0.0418754	0.253985	0.0364481	0.616611	0.976483	0.0193748	0.905217	0.9943	0.876791	0.843727	1.03655	0.962378	1.97016	1	1	1	1	1	1	1
cg04536575	0.130024	1.7225e-08	0.00166946	6.57792e-05	0.0155453	0.0159295	0.101229	0.910865	1.3291	1.02144	0.825271	0.871803	0.808958	1.06572	1	5.39143e-06	0.522542	0.0177604	1	1	1
cg04633513	0.919037	0.301593	0.189278	0.0283637	0.961206	0.882034	1.40851e-05	0.716032	1.03589	0.668599	0.783661	0.898539	0.877317	3.80765	1	1	1	1	1	1	0.0046199
cg04737319	0.648556	0.95952	0.250214	0.63809	0.504009	0.829176	0.200221	1.26084	1.04515	0.891238	0.874536	1.07965	1.09377	1.20353	1	1	1	1	1	1	1
cg04747322	0.558817	3.68527e-05	7.96163e-12	2.42185e-07	9.70368e-09	0.603311	2.36922e-13	0.826183	1.28911	0.424032	0.483575	2.12634	1.22304	2.89449	1	0.0097291	2.83434e-09	7.60461e-05	3.4351e-06	1	8.43441e-11
cg04749104	0.800423	1.30006e-06	0.211445	0.0204737	0.504009	0.172146	0.326841	0.956138	1.23266	0.953097	0.913691	0.937299	0.897707	1.09281	1	0.000375717	1	1	1	1	1
cg04878152	0.00786647	0.0755909	0.0687248	0.000216338	0.340412	0.0030245	0.000106171	1.33127	0.917109	0.924783	0.704275	1.05691	1.47852	1.52664	1	1	1	0.0555989	1	1	0.0336562
cg04941721	0.181864	1.17978e-05	0.00119046	0.0189892	0.104598	0.253193	2.09694e-08	0.596708	1.08446	0.493593	0.545506	0.972736	1.55723	5.25069	1	0.003268	0.379755	1	1	1	7.31834e-06
cg05070690	0.95735	0.231176	0.852934	0.494969	0.370096	0.276153	0.211196	0.990796	0.997763	1.0046	0.992902	0.997489	1.00928	1.01015	1	1	1	1	1	1	1
cg05294243	0.655145	2.04522e-09	0.000399337	8.39401e-09	0.943926	0.476992	5.76721e-07	0.882601	1.36073	0.838569	0.644747	1.00363	1.33051	1.64531	1	6.60607e-07	0.130184	2.77002e-06	1	1	0.000197815
cg05417950	0.268946	0.00129482	0.00794746	0.302282	0.540711	0.809909	0.0171679	0.977287	1.12262	0.824074	0.864451	1.04323	1.01188	1.72352	1	0.304282	1	1	1	1	1
cg05532892	0.533367	8.5907e-06	0.242798	0.00186373	0.616611	0.0172675	0.0636821	0.823648	1.25605	0.758629	0.749738	0.939834	0.740781	2.64047	1	0.00239681	1	0.437976	1	1	1
cg05615150	0.807847	0.00361884	0.374284	0.235127	0.00120821	0.0155046	0.0590365	1.08822	1.13407	0.982254	0.898852	0.788429	1.24632	1.15308	1	0.796146	1	1	0.398708	1	1
cg05658858	0.496059	0.64439	0.495654	0.913532	0.616611	0.0497361	0.556047	1.03793	0.996162	1.01343	1.02183	0.947566	0.869734	1.0593	1	1	1	1	1	1	1
cg05679613	0.15489	0.113503	0.709751	5.90783e-05	0.21636	0.162457	0.116264	0.979849	1.01515	1.00451	0.960229	1.01471	1.02045	1.01844	1	1	1	0.0161284	1	1	1
cg05718625	0.150833	0.346471	0.776038	0.73967	0.370096	0.912285	0.29705	0.932574	0.949695	0.900175	0.886957	0.928633	1.01357	2.01049	1	1	1	1	1	1	1
cg05761032	0.996617	0.535714	0.755338	0.903164	0.731892	0.28091	0.798722	0.985222	0.98826	0.936546	1.0063	0.970568	1.54632	0.95745	1	1	1	1	1	1	1
cg05949173	0.955948	5.55476e-07	2.79832e-07	0.0207679	0.540711	0.0163648	0.00313342	1.01077	1.36901	0.786399	0.807229	1.02958	1.24981	1.32031	1	0.000164421	9.82211e-05	1	1	1	0.886758
cg06117855	0.428149	0.582556	0.209798	2.30472e-05	0.370096	0.0627397	0.000122458	0.84406	1.01615	1.06311	0.511335	0.841386	1.69141	1.98763	1	1	1	0.00649931	1	1	0.0383293
cg06335814	0.769911	0.00245965	0.807529	0.119481	0.370096	0.822833	0.438342	0.958629	1.15786	0.973855	0.911804	0.935982	0.983882	1.11796	1	0.550962	1	1	1	1	1
cg06385087	0.62387	2.25414e-07	0.0554536	0.0311089	0.804763	0.276153	0.311698	0.711983	1.52683	0.54177	0.535536	1.07418	0.892252	3.75729	1	6.78498e-05	1	1	1	1	1
cg06438404	0.950059	0.380877	0.722037	0.489445	0.578335	0.0613201	0.759203	1.0358	1.05184	0.990986	1.01175	0.976042	0.868613	0.992628	1	1	1	1	1	1	1
cg06463913	0.587889	0.263417	0.394437	0.159037	0.578335	0.545862	0.963704	1.06776	1.03157	1.00115	0.918421	0.973146	1.06814	1.06029	1	1	1	1	1	1	1
cg06577463	0.303884	0.210332	0.881969	0.6838	0.655222	0.0975962	0.409847	0.888518	1.05414	1.01686	0.967333	1.03107	0.94955	0.96535	1	1	1	1	1	1	1
cg06654134	0.632091	0.555079	0.516113	0.663945	0.804763	0.0187053	0.535601	0.937591	1.0435	1.01387	1.02098	1.02276	0.803657	0.949476	1	1	1	1	1	1	1
cg06723357	0.20293	3.37132e-05	0.0522415	1.76669e-05	0.011633	0.783203	0.0104201	0.936404	1.13578	0.991619	0.819814	1.04379	1.04315	1.10809	1	0.00896771	1	0.00505274	1	1	1
cg06797533	0.433845	0.0519295	0.00329271	5.18939e-05	1.45383e-06	0.133261	9.29751e-09	0.58394	0.801489	0.317072	0.24698	3.01047	0.948822	5.47104	1	1	1	0.0142189	0.000505934	1	3.25413e-06
cg06834261	0.0243881	0.674469	0.0477248	0.0166666	0.731892	0.342591	0.492801	1.08401	0.95167	0.875399	1.00211	0.951951	2.01299	0.950667	1	1	1	1	1	1	1
cg06905862	0.260689	0.109052	0.940815	0.214716	0.401377	0.0509221	0.337958	1.03663	1.01126	0.934822	0.910026	0.922752	0.816304	1.70183	1	1	1	1	1	1	1
cg06919956	0.609106	0.301593	0.171758	0.0119337	0.196287	0.2906	0.220966	1.02218	1.0479	1.03962	0.902743	0.986862	0.946515	1.01508	1	1	1	1	1	1	1
cg07039362	0.321296	2.24171e-09	0.0227437	1.4692e-06	2.32734e-05	0.755546	0.0759823	0.854204	1.33828	1.05667	0.737675	0.756592	1.10215	1.20066	1	7.19589e-07	1	0.000449576	0.00798279	1	1
cg07052880	0.297108	0.794795	0.000556888	0.222274	0.370096	0.076828	0.0339481	1.03693	1.02211	0.993196	0.954913	0.990117	1.03903	1.04064	1	1	0.180432	1	1	1	1
cg07138512	0.720634	1.38517e-06	0.00567354	1.39729e-06	0.0401363	0.0431098	0.000467924	0.854682	1.29952	0.825144	0.691207	1.18161	0.890794	1.72672	1	0.000397544	1	0.000428968	1	1	0.140845
cg07148914	0.822414	0.121481	0.00143116	0.0281691	0.00120821	0.400415	1.22292e-09	0.671613	0.735299	0.562688	0.584791	1.32102	2.13366	4.17544	1	1	0.453679	1	0.398708	1	4.32914e-07
cg07173760	0.113725	1.67428e-07	0.00119046	8.64347e-09	0.578335	0.182285	9.04914e-05	0.861018	1.39856	0.86278	0.642898	1.07282	1.27058	1.39276	1	5.08981e-05	0.379755	2.8437e-06	1	1	0.0288668
cg07293947	0.171994	3.53546e-09	0.00361131	4.99395e-07	0.261137	0.998832	0.000732754	0.731385	1.29865	0.767144	0.60137	1.08526	0.906933	2.59924	1	1.12428e-06	1	0.000155811	1	1	0.21543
cg07294774	0.83935	0.0208588	0.132401	0.085307	0.922798	0.0521325	0.000496147	1.06923	1.01825	0.692725	0.78972	1.26264	0.701365	2.62207	1	1	1	1	1	1	0.148348
cg07326074	0.783792	0.998615	0.277521	0.641073	0.401377	0.0687024	0.773533	0.944011	0.895053	0.945497	0.927964	0.901999	2.13272	1.10843	1	1	1	1	1	1	1
cg07341907	0.412707	0.0280671	0.773109	0.882884	0.401377	0.337126	0.288901	0.889817	1.2365	0.948792	0.974932	0.930685	0.908813	1.01723	1	1	1	1	1	1	1
cg07374928	0.66338	0.812883	0.834786	0.0920912	0.655222	0.0297972	0.872595	0.990799	1.00228	1.00115	0.993739	1.00555	1.01471	0.992911	1	1	1	1	1	1	1
cg07448499	0.184989	1.2304e-09	0.237344	2.04737e-05	0.922798	0.348114	0.158116	0.823847	1.28685	0.912895	0.747316	0.940653	0.826971	1.73664	1	4.02341e-07	1	0.005835	1	1	1
cg07509155	0.422496	2.18038e-11	0.0222452	4.47843e-10	0.104598	0.822833	0.0596008	0.907727	1.366	0.892222	0.619689	1.1916	0.867907	1.42959	1	7.4787e-09	1	1.55402e-07	1	1	1
cg07520161	0.386819	0.0832631	0.152966	0.119481	0.961206	0.980431	0.532702	0.919324	1.05134	0.931766	1.14361	0.999725	0.962688	0.918223	1	1	1	1	1	1	1
cg07603484	0.365814	0.614353	0.186265	0.0102501	0.578335	0.0452278	0.00133737	0.983786	1.0121	1.02018	0.947617	0.982948	1.03365	1.04056	1	1	1	1	1	1	0.386499
cg07675682	0.523936	0.805712	0.0953713	0.0207679	0.655222	0.000128279	0.0293765	0.980541	1.01622	1.00598	0.925161	0.995842	1.12287	1.05675	1	1	1	1	1	0.0454108	1
cg07777378	0.835175	0.00287441	0.501462	0.260637	0.693791	0.647132	0.389825	0.979293	1.1357	0.957351	0.934486	1.02357	0.920962	1.04478	1	0.63812	1	1	1	1	1
cg07842593	0.741533	0.076982	0.0853986	0.225022	0.00101168	0.691006	0.825604	1.03049	1.06251	1.02542	1.02303	0.86456	0.886391	1.00764	1	1	1	1	0.334868	1	1
cg07864297	0.0569285	0.00936036	0.00596778	0.000327125	0.0063522	0.0410786	0.473374	0.846042	1.14225	1.15854	0.817242	0.76404	1.12168	1.0358	1	1	1	0.0817813	1	1	1
cg07886712	0.474854	1.84099e-07	0.111147	0.0168499	0.0401363	0.907553	0.329044	0.841304	1.21512	1.03115	0.847035	1.03693	0.937564	0.88903	1	5.5782e-05	1	1	1	1	1
cg07909422	0.686395	0.0368923	0.79339	0.137178	0.0516439	0.400415	0.898915	1.08164	1.06621	1.01727	0.946786	0.954367	0.931938	0.97012	1	1	1	1	1	1	1
cg07967643	0.617302	0.0868204	0.731197	0.31903	0.540711	0.162457	0.535601	0.992468	1.04085	1.00403	0.955338	0.943178	1.09938	1.03691	1	1	1	1	1	1	1
cg07997737	0.823848	0.171197	0.504378	0.917264	0.058397	0.266775	0.0419744	1.0197	1.05948	1.04094	1.01562	0.897779	0.982412	0.858376	1	1	1	1	1	1	1
cg08069899	0.0878622	0.0648048	0.105349	0.333465	0.504009	0.510933	0.00573225	0.792403	1.04368	0.796406	0.881137	1.13621	0.848618	2.13307	1	1	1	1	1	1	1
cg08164315	0.676542	0.779967	0.964381	0.772962	0.401377	0.734316	0.227667	1.084	0.986039	1.00002	1.01038	1.00167	0.953254	0.966339	1	1	1	1	1	1	1
cg08233088	0.339379	0.549244	0.253985	0.649028	0.578335	0.0641872	0.612651	0.855661	0.921035	0.864793	0.972203	1.27921	0.802356	1.58487	1	1	1	1	1	1	1
cg08317263	0.589515	0.0681036	0.0807504	6.47299e-05	0.401377	0.0124551	0.068	0.677346	1.13162	0.735928	0.610412	1.43422	1.86078	1.79555	1	1	1	0.0175418	1	1	1
cg08441546	0.661733	0.0351917	0.0339334	1.17549e-05	0.00284405	0.829176	7.15595e-07	0.792957	0.872397	0.702822	0.547551	1.71207	0.891603	3.0184	1	1	1	0.00339715	0.924317	1	0.000244734
cg08461397	0.42109	0.0465163	0.722037	0.0439857	0.237961	0.997652	0.498419	1.00414	1.10426	0.988423	0.9348	0.944495	0.960753	1.08606	1	1	1	1	1	1	1
cg08538752	0.409935	3.98875e-09	0.412602	0.102519	0.130123	0.00685022	0.394773	1.00969	0.90651	0.996398	1.02192	1.03081	1.11599	1.03791	1	1.26444e-06	1	1	1	1	1
cg08617916	0.412707	0.00097343	0.0173699	0.73967	0.616611	0.353695	0.252329	0.917946	1.13539	0.848944	0.900155	1.15421	0.879299	1.43228	1	0.231676	1	1	1	1	1
cg08675664	0.66338	1.28365e-06	0.017173	2.93143e-05	0.731892	0.203963	0.130883	1.18306	1.22365	0.785458	0.72443	1.02676	1.316	1.67135	1	0.000372259	1	0.0081787	1	1	1
cg08703971	0.681471	0.0399752	0.0192352	0.000120072	0.0063522	0.967055	0.00927	0.831267	0.932123	0.948432	0.736126	1.40576	0.843806	1.58245	1	1	1	0.0315789	1	1	1
cg08704509	0.0926877	0.00457512	0.322312	0.00554512	0.693791	0.654457	0.149386	1.01214	1.09112	0.893118	0.871295	0.909457	0.880907	1.79195	1	0.979077	1	1	1	1	1
cg08749122	0.404423	0.26846	0.359603	0.0530108	0.769052	0.127967	0.567844	0.918455	1.0583	1.02678	0.923859	1.0138	0.933507	1.03773	1	1	1	1	1	1	1
cg09037813	0.231382	1.80919e-09	6.90195e-06	1.60779e-09	0.0352717	0.418858	2.48062e-06	0.96475	1.35812	0.798837	0.597879	1.26375	0.910713	1.72083	1	5.86178e-07	0.00238808	5.46647e-07	1	1	0.000833488
cg09056317	0.152176	7.24211e-10	4.31621e-07	2.569e-08	2.35702e-06	0.223501	0.642839	0.773123	1.38007	0.768227	0.633463	1.53777	1.26374	1.17214	1	2.39714e-07	0.000151067	8.32355e-06	0.000817885	1	1
cg09065199	0.878666	0.0711065	0.939203	0.465854	0.0516439	0.907553	0.98559	0.810225	1.04318	0.956359	0.930014	0.978856	1.17327	1.32182	1	1	1	1	1	1	1
cg09080746	0.394885	0.144231	0.0222452	0.741598	0.838495	0.0255829	0.0968764	0.974163	1.03509	0.912071	0.970467	0.946381	0.934457	1.51005	1	1	1	1	1	1	1
cg09107315	0.163978	3.8497e-10	0.00876529	1.79422e-06	0.401377	0.0346115	0.0395278	0.754644	1.59622	0.836321	0.609646	1.08578	0.727432	1.6679	1	1.2781e-07	1	0.000543648	1	1	1
cg09212468	0.369696	1.99659e-07	0.000228455	7.26478e-07	0.616611	0.321086	0.000518356	0.876188	1.44052	0.812934	0.699051	1.00209	1.38672	1.41058	1	6.02971e-05	0.0753901	0.000225208	1	1	0.153952
cg09234474	0.442466	0.000748793	0.0741795	0.000155451	0.196287	0.418858	0.0557458	0.953008	1.13848	0.813706	0.682377	1.4372	0.940621	1.5909	1	0.182705	1	0.0404172	1	1	1
cg09244244	0.181864	0.00548357	0.326824	1.92118e-06	0.468445	0.113106	0.00131914	0.76369	1.17124	0.904022	0.6054	1.06147	1.50742	1.76771	1	1	1	0.000578274	1	1	0.382551
cg09312149	0.887138	5.44009e-15	0.00401005	2.17454e-06	0.897964	0.0599281	0.0329191	0.835597	1.6014	0.86169	0.614656	1.02488	0.766375	1.53737	1	1.93123e-12	1	0.000652361	1	1	1
cg09321965	0.630446	0.0342511	0.285689	0.142497	0.991404	0.240129	0.141047	1.01671	1.01115	0.993332	0.983142	0.996654	1.01972	1.01738	1	1	1	1	1	1	1
cg09475324	0.822414	0.00153809	0.369348	0.0045215	0.237961	0.0820832	0.0223068	0.963463	1.11032	0.93188	0.90347	0.917042	0.895142	1.51154	1	0.353761	1	0.999251	1	1	1
cg09580336	0.139802	5.51781e-14	0.000180082	1.0626e-09	0.0934826	0.00557118	0.000147885	0.586279	1.92182	0.659596	0.414262	1.21738	0.639997	2.53065	1	1.93675e-11	0.0597872	3.67658e-07	1	1	0.0461401
cg09712527	0.558817	0.488495	0.384278	0.085307	0.104598	0.10848	1.26803e-05	0.464695	0.603035	0.548978	0.430723	1.61256	0.541411	6.89265	1	1	1	1	1	1	0.0041845
cg09773756	0.780727	0.252322	0.000905772	0.00941867	6.7592e-05	0.0290549	5.50643e-08	0.557091	0.711442	0.267058	0.317819	2.80572	0.297105	7.45581	1	1	0.289847	1	0.0229137	1	1.91624e-05
cg09793866	0.301614	4.29212e-13	0.063	6.90361e-08	0.0054319	0.0128042	0.417509	0.887119	1.39817	0.980095	0.69622	0.830465	1.33589	1.14663	1	1.48937e-10	1	2.20916e-05	1	1	1
cg09893305	0.990902	4.44437e-07	0.000120304	1.91585e-10	0.00143988	0.0249344	4.14334e-09	1.02529	1.25317	0.80699	0.530837	1.32576	1.30515	1.65703	1	0.000131998	0.040302	6.70548e-08	0.47228	1	1.45431e-06
cg10025865	0.105979	1.71863e-13	0.000706319	3.65911e-08	0.540711	0.0108352	0.00374848	0.846098	1.47252	0.917577	0.711912	1.00576	0.797913	1.29145	1	6.01519e-11	0.228141	1.18189e-05	1	1	1
cg10145725	0.541275	0.109052	0.545925	0.00411155	0.340412	0.719984	0.855981	0.999555	1.00624	1.00401	0.995677	1.00794	0.955962	0.997205	1	1	1	0.912765	1	1	1
cg10189763	0.0853202	7.54952e-15	0.000332161	1.87239e-09	0.144673	0.912285	0.0281742	0.767556	1.72458	0.889613	0.561063	0.956459	1.0631	1.30274	1	2.67253e-12	0.108617	6.3474e-07	1	1	1
cg10235741	0.754236	0.110309	0.14058	0.277047	0.0236385	0.952242	0.107596	0.993472	0.998321	1.00489	0.997717	0.994985	0.99876	1.00596	1	1	1	1	1	1	1
cg10326447	0.8635	0.0280671	0.600951	0.170296	0.922798	0.705538	0.627727	1.16041	1.11595	0.939765	0.896099	0.983443	0.905782	1.17985	1	1	1	1	1	1	1
cg10331048	0.65844	0.00159445	0.927217	0.001241	0.540711	0.769479	0.299113	0.964107	1.19064	0.90435	0.841192	0.992958	0.884465	1.46671	1	0.365129	1	0.299082	1	1	1
cg10367730	0.251624	0.000233674	0.923571	0.113909	0.540711	0.755546	0.116264	0.943318	1.09137	1.00171	0.962349	1.00461	1.04069	0.889499	1	0.0586522	1	1	1	1	1
cg10414058	0.439582	0.0932154	0.000288931	6.44205e-08	0.00143988	0.00451424	7.99984e-06	0.81226	1.08252	0.795666	0.574339	1.40267	1.67558	1.78093	1	1	0.0950584	2.07434e-05	0.47228	1	0.00265595
cg10451565	0.422496	0.0943186	0.0122647	5.68238e-09	0.00741284	0.000842658	0.000152582	1.07615	1.09307	0.932657	0.655951	1.12648	1.37384	1.37114	1	1	1	1.9036e-06	1	0.29156	0.0474529
cg10857807	0.0878622	0.535714	0.752347	0.44024	0.0516439	0.0276191	0.924017	1.0661	0.914483	0.886855	0.876594	1.02421	2.32992	0.977617	1	1	1	1	1	1	1
cg11119596	0.84893	0.00594873	0.0501905	6.13461e-05	0.693791	0.000281164	0.0387404	0.87114	1.13188	0.851495	0.672762	1.05762	2.07894	1.4164	1	1	1	0.0166861	1	0.0989696	1
cg11278262	0.991831	0.560933	0.335977	0.417103	0.21636	0.207762	0.0109152	0.893048	0.965688	0.66518	0.752061	1.06542	1.21047	3.23575	1	1	1	1	1	1	1
cg11326613	0.738337	7.49161e-07	0.72815	2.25069e-07	0.897964	0.510933	0.443638	1.08696	1.17517	0.963742	0.784976	0.976746	0.936982	1.28462	1	0.000219504	1	7.08967e-05	1	1	1
cg11502800	0.907568	0.080798	0.945502	0.467648	0.370096	0.370787	0.579713	0.983352	1.06665	0.992019	1.00453	0.969941	1.04112	0.909761	1	1	1	1	1	1	1
cg11526405	0.141065	0.178526	0.905978	0.922103	0.340412	0.49044	0.838533	1.06029	1.04724	0.995432	0.986944	0.931298	0.995461	1.01602	1	1	1	1	1	1	1
cg11584111	0.902095	0.0493179	0.0240335	0.247935	0.160505	0.912285	0.0267325	1.03312	1.13052	0.89484	0.927389	1.06853	1.01288	1.13553	1	1	1	1	1	1	1
cg11784281	0.350549	0.208225	0.0538269	0.0202555	0.104598	0.031332	0.00704918	0.985994	1.0217	1.03235	0.947579	0.946302	1.06508	1.01618	1	1	1	1	1	1	1
cg11840540	0.408553	0.00539463	0.455899	0.00766098	0.340412	0.223501	0.00436214	0.788268	1.03196	0.738533	0.717218	0.876909	0.795995	3.63814	1	1	1	1	1	1	1
cg11879577	0.956653	0.00639793	0.00160106	8.21152e-09	0.0054319	0.207762	1.40851e-05	0.825056	1.1801	0.733257	0.519007	1.4527	1.23457	2.25733	1	1	0.502731	2.71801e-06	1	1	0.0046199
cg11959821	0.995461	0.993475	0.391882	0.864749	0.838495	0.698282	0.995687	1.03565	1.10169	0.967312	0.935583	1.02072	0.965916	1.00453	1	1	1	1	1	1	1
cg12045829	0.233255	0.0014439	0.0838248	3.63651e-06	0.0179137	0.002667	0.443638	0.774426	1.25814	1.04452	0.66973	0.732349	1.86653	1.19868	1	0.333541	1	0.00107277	1	0.912115	1
cg12242338	0.233255	7.71068e-10	0.239151	1.5406e-05	1.19699e-05	0.0400946	0.492801	0.860671	1.37352	1.06656	0.759903	0.655412	1.34249	1.06182	1	2.54453e-07	1	0.00442152	0.00411765	1	1
cg12530021	0.599295	2.54375e-07	0.0227437	7.40605e-07	0.468445	0.0802988	3.46653e-06	0.927488	1.34654	0.880763	0.653722	0.974285	1.2826	1.50992	1	7.63125e-05	1	0.000228847	1	1	0.00116129
cg12582008	0.000827233	6.36313e-12	0.0693874	7.09002e-09	0.21636	0.734316	6.80696e-06	0.496385	1.69925	1.00829	0.511334	0.824616	0.907737	1.62366	0.294495	2.18892e-09	1	2.36098e-06	1	1	0.00226672
cg12611860	0.959401	0.263417	0.850393	0.0185831	0.838495	0.63981	0.0290718	0.987271	1.00667	1.00402	0.987811	1.0008	1.00268	1.0055	1	1	1	1	1	1	1
cg12658982	0.998371	3.64455e-05	0.0919442	0.086578	0.196287	0.998597	0.0169789	1.04591	1.20449	0.936063	0.924854	0.90486	0.997093	1.10752	1	0.00965806	1	1	1	1	1
cg12683641	0.614022	0.165857	0.616453	0.197679	0.838495	0.0121147	0.00766745	0.995925	1.00982	0.989375	0.963531	0.998373	1.06428	1.06559	1	1	1	1	1	1	1
cg12927153	0.773015	0.993923	0.233759	0.394687	0.285951	0.95858	0.14339	1.07218	0.93205	0.856235	0.868477	0.976633	1.0329	2.06749	1	1	1	1	1	1	1
cg13109289	0.500659	0.857076	0.709751	0.785037	0.731892	0.0585633	0.259726	0.993955	0.998999	1.0032	0.996363	1.00441	1.0118	0.987918	1	1	1	1	1	1	1
cg13243219	0.578154	4.59678e-05	0.216444	0.111678	0.0934826	0.853664	0.538505	1.06914	1.14243	0.969891	0.944748	0.904022	0.920028	1.09656	1	0.0120895	1	1	1	1	1
cg13496066	0.725481	0.580581	0.407362	0.597484	0.00863241	0.0474356	0.57377	0.943991	1.00804	1.00999	1.00443	0.9789	1.00908	1.01271	1	1	1	1	1	1	1
cg13515674	0.446812	0.062421	0.350025	0.141343	0.731892	0.841603	0.324647	1.14101	1.13189	0.903987	0.9931	1.06969	0.994781	0.861639	1	1	1	1	1	1	1
cg13605690	0.202086	0.00469029	0.00499508	0.00242155	0.922798	0.337126	0.3586	1.10876	1.13338	0.920963	0.899035	0.972512	1.15562	1.10017	1	0.999031	1	0.556956	1	1	1
cg13613748	0.409935	6.75362e-07	0.516113	0.0001812	0.943926	0.331721	0.333481	0.745045	1.23535	0.99978	0.64889	0.903923	0.834778	1.90568	1	0.000198556	1	0.0469309	1	1	1
cg13796218	0.150833	6.29361e-08	0.0183852	1.56672e-07	0.0934826	0.00769616	0.0148517	0.707934	1.43921	0.816123	0.634642	1.04538	0.661061	2.20909	1	1.92584e-05	1	4.9665e-05	1	1	1
cg13801381	0.936052	0.24512	0.444852	0.0277835	0.177688	0.989497	0.000503448	0.65686	1.12407	0.565415	0.561158	1.49732	0.652654	3.95943	1	1	1	1	1	1	0.150028
cg13812587	0.280638	3.69414e-07	1.26354e-05	2.09417e-05	0.00084535	0.400415	0.000282077	0.695149	1.29013	0.588102	0.563535	1.50381	0.93789	2.98459	1	0.000110085	0.00435922	0.00592649	0.281501	1	0.0865978
cg13859324	0.0557526	2.24171e-09	0.0353937	6.57728e-08	0.869724	0.000155099	0.0319175	0.749572	1.33598	0.903516	0.683078	0.957883	1.64336	1.29678	1	7.19589e-07	1	2.11131e-05	1	0.05475	1
cg13881341	0.00163027	8.41436e-11	0.0156681	5.9842e-09	0.434191	0.076828	0.0105419	0.706818	1.33314	0.948154	0.727008	0.97007	1.21163	1.3121	0.575486	2.84405e-08	1	1.99872e-06	1	1	1
cg13908523	0.237036	0.0137218	0.458684	0.214716	0.261137	0.235887	0.00447296	1.03374	1.05871	0.953985	0.961558	0.976648	0.881593	1.23119	1	1	1	1	1	1	1
cg13935507	0.287145	0.0317773	0.97396	0.513581	0.769052	0.98691	0.23452	1.10045	1.07367	1.02104	0.941244	0.932512	1.01626	0.918894	1	1	1	1	1	1	1
cg14001567	0.878666	0.000362799	0.0115597	0.0312149	0.540711	0.463728	0.00192769	0.78124	1.05493	0.65273	0.682809	1.18263	1.46263	2.92998	1	0.0896113	1	1	1	1	0.549392
cg14003467	0.970401	0.0435662	0.984498	0.0695231	0.540711	0.203963	0.809628	1.03994	1.06272	1.01602	0.919191	1.0083	0.889837	1.01583	1	1	1	1	1	1	1
cg14086033	0.384154	0.102945	0.113137	0.561306	0.616611	0.000575579	0.95891	0.907904	1.10025	1.05343	0.965605	0.972795	0.782532	0.935217	1	1	1	1	1	0.200877	1
cg14159672	0.461461	8.08003e-05	0.137026	0.00736493	0.0455759	0.783203	0.0164229	1.09763	0.808087	1.11507	0.793117	1.14996	0.953916	1.22432	1	0.0210081	1	1	1	1	1
cg14308452	0.297108	0.0344842	0.0103823	0.00305192	0.0455759	0.0802988	3.79722e-05	0.941614	1.05121	0.971652	0.907896	1.05045	1.03992	1.14364	1	1	1	0.689734	1	1	0.0122271
cg14311811	0.988533	0.00750902	0.478417	0.269365	0.144673	0.967055	0.422664	0.9262	1.14087	1.00699	0.881858	0.940341	0.94191	1.14994	1	1	1	1	1	1	1
cg14438174	0.273181	0.00137994	0.0911037	0.318319	0.897964	0.406508	0.0862838	1.00384	0.817815	0.898504	0.952437	1.64911	1.05433	0.833968	1	0.320146	1	1	1	1	1
cg14579051	0.266864	4.1207e-12	0.000548612	4.44089e-16	0.504009	0.0420835	0.0173588	0.911962	1.57318	0.905796	0.463518	1.03158	1.29127	1.37856	1	1.42164e-09	0.178299	1.58096e-13	1	1	1
cg14654875	0.326052	0.610361	0.934215	0.00680387	0.370096	0.223501	0.670058	1.10058	1.01835	0.996318	0.889948	1.03207	1.1193	1.0099	1	1	1	1	1	1	1
cg14709481	0.0557526	5.56833e-11	0.0210412	1.14765e-09	0.693791	0.74851	0.022068	0.810415	1.38439	0.938901	0.702799	1.0122	0.992855	1.28939	1	1.88767e-08	1	3.95939e-07	1	1	1
cg14719352	0.828128	0.0315604	0.0196733	0.000112211	0.000487008	0.000536513	0.558989	1.02674	1.0945	1.05432	0.851046	0.839537	1.2186	1.06159	1	1	1	0.0297358	0.163148	0.18778	1
cg14823109	0.607469	0.0424325	0.561057	0.403731	0.0236385	0.81641	0.225977	0.95878	1.09501	0.997323	0.991644	0.910475	1.01201	1.0037	1	1	1	1	1	1	1
cg14865516	0.893013	2.77065e-08	0.357193	3.46178e-05	0.340412	0.755546	0.459734	1.08822	1.2986	0.957178	0.736263	0.952667	0.999277	1.16911	1	8.5059e-06	1	0.00962375	1	1	1
cg14885742	0.950059	3.59752e-07	0.123533	0.000242836	0.616611	0.101835	0.999428	0.97253	1.48974	0.894143	0.793035	1.04553	0.787976	0.971579	1	0.000107566	1	0.0619232	1	1	1
cg14893161	0.458511	0.0267309	0.273501	0.00465351	0.312359	0.847681	0.005194	1.11309	0.873102	1.0868	0.758204	1.11087	0.954308	1.3113	1	1	1	1	1	1	1
cg14902389	0.752656	0.499656	3.98056e-05	0.132384	8.89236e-07	0.168866	0.273086	1.00076	1.01367	1.08676	0.981857	0.853782	1.0653	0.913817	1	1	0.0134941	1	0.000311233	1	1
cg14908548	0.792912	0.278789	0.223249	0.112948	0.731892	0.916887	0.035364	1.02501	1.06521	0.945421	0.982183	0.990417	0.955805	1.13148	1	1	1	1	1	1	1
cg15009698	0.648556	0.0103532	0.504378	0.885791	0.312359	0.0182146	0.980027	0.925326	1.31404	0.905735	1.08407	0.824119	0.823955	1.00022	1	1	1	1	1	1	1
cg15043057	0.937805	0.0340195	0.0154886	0.00790558	0.000586518	0.0010689	7.29714e-07	1.03808	0.928596	0.87663	0.814361	1.24292	1.34435	1.42497	1	1	1	1	0.195897	0.368769	0.000248832
cg15269863	0.950059	0.372874	0.607144	0.849597	0.769052	0.0485741	0.784832	0.993033	1.05339	0.980943	1.02446	1.01007	0.835701	0.996563	1	1	1	1	1	1	1
cg15379237	0.574918	0.322777	0.663195	0.931862	0.434191	0.603311	0.567844	1.01717	1.06554	1.00879	0.989641	0.936419	0.928872	0.991331	1	1	1	1	1	1	1
cg15473904	0.558817	8.28515e-09	0.223249	3.63651e-06	0.468445	0.253193	0.927543	0.797685	1.90911	0.89561	0.517084	1.06892	0.717757	1.08241	1	2.60982e-06	1	0.00107277	1	1	1
cg15489422	0.0122075	0.0160453	0.548941	0.0125323	0.693791	0.159325	0.168587	0.978062	1.01532	1.00082	0.989854	1.00125	0.990977	1.00814	1	1	1	1	1	1	1
cg15502888	0.249641	0.520406	0.240969	0.718287	0.731892	0.0895585	0.138735	0.86815	1.27622	0.970046	0.955919	0.97877	0.863555	0.861264	1	1	1	1	1	1	1
cg15611364	0.610744	0.000219882	0.915988	0.330544	0.616611	0.331721	0.370414	0.918557	1.29973	0.893924	0.897193	0.895956	1.44223	0.968306	1	0.0554102	1	1	1	1	1
cg15612847	0.178017	0.436307	0.573255	0.0825659	0.116789	0.182285	0.427854	0.988353	0.995983	1.01665	0.986488	0.997718	0.996212	0.994663	1	1	1	1	1	1	1
cg15693736	0.423905	0.127761	0.513168	0.520164	0.769052	0.00815384	0.24869	0.994842	0.999679	1.00154	0.996755	0.999261	1.00646	1.00369	1	1	1	1	1	1	1
cg15786837	0.864794	2.24171e-09	4.3375e-05	3.08581e-06	0.0516439	0.74851	0.00365428	0.779013	1.52669	0.590849	0.634635	1.17742	0.875237	2.76597	1	7.19589e-07	0.0146607	0.000916485	1	1	1
cg15982308	0.810791	0.263417	0.718973	0.12879	0.540711	0.596051	0.732924	0.932352	0.975134	1.00607	0.850023	0.866683	2.13789	0.948103	1	1	1	1	1	1	1
cg16169604	0.679829	0.557028	0.00719962	4.03053e-06	0.000403531	0.0290549	1.26803e-05	0.815556	0.739329	0.523535	0.441326	1.67673	2.03241	4.14387	1	1	1	0.00117691	0.135587	1	0.0041845
cg16179125	0.725481	0.251111	0.364455	0.00967632	0.0934826	0.412656	0.0780975	0.83575	1.75186	0.799096	0.793772	0.964953	0.7807	1.14859	1	1	1	1	1	1	1
cg16356516	0.919037	0.668459	0.374284	0.0432742	0.804763	0.567216	0.688159	1.00478	1.00325	1.00672	0.98117	1.00345	0.99684	1.00311	1	1	1	1	1	1	1
cg16504670	0.578154	0.000846259	0.000198136	1.327e-05	0.0236385	0.0687024	0.000481841	0.989209	1.09181	0.880686	0.784981	1.16831	1.22258	1.35552	1	0.203102	0.0655829	0.00382175	1	1	0.144552
cg16632280	0.377539	0.812883	0.00439174	0.0562955	4.44036e-05	0.683715	0.0011979	1.15129	0.869594	0.610172	0.606714	2.11173	1.30017	1.99649	1	1	1	1	0.0151416	1	0.348589
cg16756998	0.00394654	0.948005	0.404757	0.539159	0.237961	0.560069	0.606635	0.684463	0.821592	0.941166	0.802093	1.62916	0.74928	1.54915	1	1	1	1	1	1	1
cg16807911	0.982126	0.019548	0.706668	0.738704	0.804763	0.305577	0.392294	1.04335	1.06196	0.983268	0.960414	0.984771	0.895876	1.07843	1	1	1	1	1	1	1
cg16904599	0.656792	0.293398	0.439382	0.101931	0.370096	0.632491	0.825604	0.984815	1.12211	0.994162	1.06247	0.900476	0.792676	0.941211	1	1	1	1	1	1	1
cg16932672	0.374913	0.872784	0.999563	0.858451	0.769052	0.876576	0.138735	0.860121	0.940199	1.00736	1.0334	0.919565	1.08946	1.2385	1	1	1	1	1	1	1
cg16970828	0.53969	0.243934	0.333673	0.106712	0.261137	0.776368	0.518303	0.815284	1.16306	1.04174	0.775005	0.895277	1.35458	1.13408	1	1	1	1	1	1	1
cg16994506	0.651851	0.231176	0.160808	0.727069	0.616611	0.89771	0.00794722	0.912508	0.892895	0.548873	0.685571	1.57996	1.22947	3.32332	1	1	1	1	1	1	1
cg17329249	0.605832	0.10235	0.331379	0.663945	0.160505	0.0452278	0.238005	0.717565	1.31296	0.781526	1.04056	0.667993	0.606774	2.36598	1	1	1	1	1	1	1
cg17542835	0.499124	0.0106773	0.0945047	0.569076	0.693791	0.144383	0.967056	1.18131	1.15605	0.941592	0.924651	1.01443	0.81193	1.00799	1	1	1	1	1	1	1
cg17788832	0.488435	0.0737691	0.725096	0.00154012	0.468445	8.39219e-05	0.0119697	0.969756	1.00434	0.982734	0.871866	0.991726	1.3424	1.17051	1	1	1	0.366547	1	0.0297923	1
cg17791766	0.984009	0.113503	0.734239	0.186915	0.616611	0.172146	0.397262	1.05781	1.05804	1.00315	0.934437	0.972999	0.899633	1.07941	1	1	1	1	1	1	1
cg17792192	0.397596	0.459326	0.781865	0.571024	0.540711	0.178855	0.651914	0.997835	0.998233	0.999739	1.0009	1.00179	1.00188	1.00029	1	1	1	1	1	1	1
cg17808849	0.397596	1.51533e-10	0.190799	0.00101528	0.540711	0.632491	0.715132	0.925588	1.28069	0.914681	0.852375	1.01195	0.96052	1.14263	1	5.10667e-08	1	0.245698	1	1	1
cg17854497	0.95306	0.297476	0.17745	0.417948	0.578335	0.156242	0.080995	0.997564	0.936904	1.04648	0.996241	1.10805	0.885168	0.874988	1	1	1	1	1	1	1
cg17860158	0.0084476	0.00484797	0.0130082	0.000494663	0.0205996	0.871007	2.13494e-06	0.539967	1.19694	0.791876	0.693634	1.28626	1.20996	1.9905	1	1	1	0.122182	1	1	0.000719475
cg17960516	0.578154	0.000799886	0.181816	0.070163	0.312359	0.106226	0.00894815	0.912467	1.28074	0.899743	0.922093	0.970216	0.892645	1.16735	1	0.192773	1	1	1	1	1
cg18023080	0.00355733	8.43087e-08	0.0146182	0.000101063	0.401377	0.00412039	0.353943	0.833599	1.27661	0.968947	0.78371	0.93125	1.28996	1.10673	1	2.57142e-05	1	0.0268828	1	1	1
cg18149207	0.996261	0.290702	0.912054	0.000118213	0.869724	0.0431098	1.43332e-05	1.00641	1.03551	0.994384	0.845562	1.01022	1.16083	1.17753	1	1	1	0.0312081	1	1	0.0046583
cg18340214	0.874949	0.000784964	0.842664	0.140961	0.578335	0.110773	0.515442	1.03945	1.12268	0.94089	0.904307	0.979201	0.815657	1.31611	1	0.190746	1	1	1	1	1
cg18353563	0.557215	7.68795e-07	0.00539263	4.40796e-05	0.0024066	0.382469	0.347033	0.858215	1.30016	0.764054	0.633501	1.35116	1.46055	1.45797	1	0.000224488	1	0.0121219	0.78455	1	1
cg18380974	0.981331	0.87734	0.17745	0.063984	0.130123	0.0687024	0.146964	1.02445	1.00656	0.857031	0.880364	1.25717	1.41772	1.09446	1	1	1	1	1	1	1
cg18397523	0.346799	1.61356e-05	4.41245e-05	2.47923e-05	0.000124959	0.310688	5.32996e-07	0.74768	0.851715	0.459951	0.614888	2.07612	0.881602	3.92875	1	0.00438887	0.01487	0.00696665	0.0422361	1	0.000183351
cg18477315	0.568462	0.198941	0.311219	0.33862	0.897964	0.887377	0.0383518	0.923464	1.09707	0.898829	0.900069	1.1033	1.01414	1.2936	1	1	1	1	1	1	1
cg18530716	0.489956	0.0105954	0.246485	0.0686776	0.401377	0.207762	0.000722368	1.2526	1.23735	0.762868	0.66556	1.08426	0.606342	2.29782	1	1	1	1	1	1	0.213099
cg18565479	0.75739	0.0493179	0.0175689	0.122521	0.897964	0.871007	0.0383518	0.789278	0.872211	0.841996	0.732284	1.4939	0.88112	2.08846	1	1	1	1	1	1	1
cg18573251	0.372299	3.92583e-11	4.9803e-07	3.29972e-06	0.401377	0.0329359	5.12354e-07	0.943992	1.26421	0.894393	0.727799	1.03999	1.18459	1.35927	1	1.33871e-08	0.000173314	0.000976716	1	1	0.000176762
cg18652852	0.812257	0.165857	0.826763	0.992903	0.177688	0.0509221	0.621691	1.03416	1.13129	0.9757	0.977898	0.965967	0.888775	0.95964	1	1	1	1	1	1	1
cg18680834	0.523936	3.03646e-13	0.0467683	5.00982e-09	0.237961	0.168866	0.011564	0.938589	1.64707	0.898613	0.606901	0.848271	0.711445	1.59303	1	1.05669e-10	1	1.6833e-06	1	1	1
cg18962105	0.174985	0.422464	0.579382	0.00327975	0.196287	0.418858	0.627727	0.701753	1.35502	0.751128	0.472607	1.58239	1.32738	1.7184	1	1	1	0.737945	1	1	1
cg19044674	0.754236	0.848935	0.417881	0.412897	0.116789	0.083901	0.254164	0.986921	1.0266	1.00763	1.05443	0.951457	0.973001	0.902971	1	1	1	1	1	1	1
cg19125606	0.133018	5.2107e-11	1.28688e-11	6.27775e-06	0.00084535	0.734316	0.000353296	0.761735	1.42596	0.753795	0.687512	1.26988	1.05838	1.60394	1	1.77164e-08	4.56843e-09	0.00182055	0.281501	1	0.107402
cg19175383	0.15489	0.87583	0.999845	0.58765	0.237961	0.86533	0.495606	1.07382	1.02144	1.00032	0.9873	0.98282	0.991094	0.954353	1	1	1	1	1	1	1
cg19205041	0.0286443	0.420752	0.18329	0.382555	0.804763	0.734316	0.606635	1.01398	0.989143	0.998526	1.00763	1.00796	1.01005	0.979968	1	1	1	1	1	1	1
cg19584957	0.0944966	0.062421	0.200124	0.755968	0.504009	0.000709405	0.0169789	0.982322	0.99003	0.996081	0.995027	1.01093	1.03349	1.0218	1	1	1	1	1	0.246873	1
cg19778698	0.92004	9.49463e-13	2.23908e-05	3.12758e-11	0.104598	0.406508	0.000786813	0.89129	1.66088	0.738789	0.511041	1.2171	1.36308	1.45851	1	3.28514e-10	0.00763527	1.10403e-08	1	1	0.230536
cg19779211	0.405797	1.51533e-10	0.014961	0.000296362	0.21636	0.925697	0.967056	0.841781	1.65546	0.815872	0.738494	0.995174	1.07048	1.13111	1	5.10667e-08	1	0.0743867	1	1	1
cg19815589	0.423905	0.0751319	0.425873	0.114231	0.897964	0.741432	0.37762	0.99008	1.00742	1.00655	0.997657	0.980537	1.00692	1.00217	1	1	1	1	1	1	1
cg19875047	0.316587	0.00129482	0.0265196	0.536293	0.984599	0.406508	0.0994691	1.0443	1.09078	0.891388	0.974775	0.975665	0.912463	1.35496	1	0.304282	1	1	1	1	1
cg19948014	0.752656	0.648402	0.755338	0.0447073	0.961206	0.376599	0.103016	1.08215	1.07324	0.978244	0.933425	0.991785	0.885941	1.09825	1	1	1	1	1	1	1
cg20022511	0.868643	0.832122	0.813094	0.40705	0.943926	0.882034	0.9204	1.10585	1.02363	0.977869	1.00056	0.990604	0.988346	0.965087	1	1	1	1	1	1	1
cg20070077	0.147518	0.0954327	0.0700554	0.727069	0.237961	0.63981	0.139887	0.913261	1.09529	0.956986	0.963927	0.935942	0.99776	1.22783	1	1	1	1	1	1	1
cg20195812	0.998668	0.135794	0.00342593	0.0732159	0.943926	0.162457	1.27874e-06	0.71833	0.866554	0.628689	0.634117	1.01511	1.04359	4.76873	1	1	1	1	1	1	0.000433493
cg20225915	0.947734	2.23258e-06	0.539912	2.72657e-05	0.160505	0.133261	0.877178	0.986183	1.31666	0.964344	0.768413	0.970091	1.09545	1.0104	1	0.00063182	1	0.00763439	1	1	1
cg20247048	0.867365	7.18975e-06	0.00155691	9.72792e-11	0.011633	0.437782	0.518303	0.932405	1.37888	1.0691	0.584968	0.765273	1.21388	1.31814	1	0.00201313	0.490426	3.4145e-08	1	1	1
cg20259398	0.55082	0.0121596	0.283631	0.456049	0.897964	0.822833	0.990425	0.990564	1.08298	0.931972	0.925953	0.989678	0.951253	1.31598	1	1	1	1	1	1	1
cg20357806	0.0926877	1.52313e-05	0.519065	0.000276474	0.922798	0.00685022	0.44897	0.984204	0.969205	1.00587	1.02973	0.976537	1.03375	1.01192	1	0.00417338	1	0.0699478	1	1	1
cg20379125	0.701125	0.000107642	0.154251	0.070163	0.804763	0.588809	0.347033	0.900455	1.11167	0.857488	0.833114	1.10673	0.880339	1.72751	1	0.0277717	1	1	1	1	1
cg20452583	0.248654	0.0284595	0.362023	0.87846	0.237961	0.610587	0.773533	1.03233	1.02532	0.916133	0.968812	0.887139	1.7893	0.995642	1	1	1	1	1	1	1
cg20492121	0.142337	0.00321315	0.000727441	0.277691	0.104598	0.185767	0.19415	1.42096	0.873261	0.477242	0.910146	2.20312	1.48715	1.42859	1	0.710106	0.234236	1	1	1	1
cg20854748	0.493003	0.0217756	0.0648612	0.843023	0.21636	0.510933	0.241528	0.942358	1.062	0.959294	0.985151	0.952734	1.34102	0.954156	1	1	1	1	1	1	1
cg20966551	0.881115	0.00469029	0.0444494	7.43789e-05	0.0516439	0.994321	0.0140383	0.934117	1.20281	0.773285	0.811287	1.073	1.22248	1.7485	1	0.999031	1	0.0200079	1	1	1
cg21224049	0.829546	0.0184451	0.929004	0.132384	0.237961	0.117893	0.188224	0.98612	1.11271	0.979903	0.817426	1.1841	0.840219	1.06401	1	1	1	1	1	1	1
cg21256656	0.717395	0.0146777	0.897555	0.730957	0.616611	0.0187053	0.0198022	0.991156	0.984282	1.00061	1.00571	0.98345	1.04406	1.02721	1	1	1	1	1	1	1
cg21339926	0.993476	0.000288662	0.453124	0.0536882	0.468445	0.0751408	0.833406	0.925855	1.27123	0.914272	0.84825	1.01331	0.77667	1.3029	1	0.0715882	1	1	1	1	1
cg21468416	0.00756505	1.03726e-09	3.01718e-05	3.45249e-10	0.401377	0.0168107	0.000120538	0.799973	1.32151	0.854028	0.693488	1.04104	1.2417	1.59302	1	3.40221e-07	0.0102584	1.20492e-07	1	1	0.0379693
cg21481775	0.113725	0.00361884	0.000327073	6.63922e-07	1.13821e-06	0.203963	2.24698e-05	1.54485	0.980824	0.62467	0.449453	2.13736	0.750466	2.13163	1	0.796146	0.10728	0.00020648	0.000397235	1	0.00728021
cg21488617	0.669964	0.000127338	0.0111545	8.8353e-09	0.058397	6.37592e-05	0.00425384	1.10209	1.17368	0.873873	0.668925	1.18518	1.48363	1.19968	1	0.0327258	1	2.89798e-06	1	0.0226983	1
cg21567017	0.973067	0.0042806	0.999422	0.121501	0.370096	0.0400946	0.211196	1.0067	1.03788	1.0094	0.944297	0.98529	1.00367	1.02726	1	0.920328	1	1	1	1	1
cg21571937	0.554014	0.278789	0.650719	0.163295	0.655222	0.803334	0.564887	0.908791	0.974138	1.04231	1.01424	0.99293	0.907054	1.02302	1	1	1	1	1	1	1
cg21610192	0.592771	0.00548357	0.155545	0.0190576	0.974681	0.976483	0.00153298	0.999737	1.10894	0.910103	0.844803	1.02804	0.965665	1.46339	1	1	1	1	1	1	0.439964
cg21667836	0.714151	0.0105954	0.0496887	0.00799912	0.196287	0.0091442	0.00813886	0.875135	1.08108	0.716764	0.821499	1.06195	2.07109	1.77014	1	1	1	1	1	1	1
cg21685565	0.233255	0.58651	0.681881	0.0886447	0.468445	0.769479	0.0379667	0.757201	0.791228	0.696527	0.70315	1.97213	0.734675	2.49141	1	1	1	1	1	1	1
cg21746459	0.954518	0.135794	0.653838	0.12184	0.838495	0.144383	0.654939	0.970335	1.03948	1.01991	0.945126	0.989104	0.972449	1.02783	1	1	1	1	1	1	1
cg21794225	0.69295	0.106574	0.000139244	0.0260148	5.39349e-07	0.00665243	0.000392043	0.925967	0.919787	0.795841	0.7973	1.49243	1.40527	1.48625	1	1	0.0463683	1	0.000189311	1	0.118789
cg21844956	0.97791	0.000215458	0.591685	0.0233423	0.104598	0.907553	0.0411446	0.928343	1.08286	0.928889	0.853954	0.851081	1.11808	1.71698	1	0.0545108	1	1	1	1	1
cg21877855	0.587889	0.00838839	0.539912	0.26685	0.370096	0.510933	0.033602	1.0522	1.16605	0.916276	0.97253	0.998895	0.859202	1.0767	1	1	1	1	1	1	1
cg21922841	0.455571	8.88178e-15	0.0763176	1.09964e-08	0.731892	0.248781	0.331258	0.752038	1.8484	0.891082	0.5805	0.95752	0.913781	1.13371	1	3.13527e-12	1	3.59583e-06	1	1	1
cg22012054	0.471861	0.737875	0.731197	0.24675	0.578335	0.0305561	0.0994691	1.09184	0.995905	1.00308	0.920357	0.918114	1.05127	1.22224	1	1	1	1	1	1	1
cg22166290	0.965178	1.82791e-06	0.265547	0.00252833	0.922798	0.0207882	0.870276	0.871697	1.20861	0.856422	0.802757	1.21046	0.758688	1.51372	1	0.000520953	1	0.578987	1	1	1
cg22175764	0.00102501	0.00275315	1.28797e-09	0.000501844	7.60725e-13	0.0627397	6.51966e-08	1.98781	0.732951	0.434366	0.549168	2.3874	1.59289	2.276	0.362854	0.613953	4.54654e-07	0.123454	2.70818e-10	1	2.26232e-05
cg22176895	0.768354	2.79726e-10	0.0192352	0.00160318	0.922798	0.0533676	0.29705	0.8552	1.88177	0.829204	0.66993	1.0164	0.645312	1.09094	1	9.34286e-08	1	0.379953	1	1	1
cg22527345	0.31425	2.19773e-05	0.00143116	3.73952e-05	0.21636	0.00144335	0.000107874	0.838806	1.08764	0.787684	0.747829	1.22417	1.55635	1.69065	1	0.00591189	0.453679	0.0103585	1	0.496512	0.034088
cg22606869	0.765234	0.0612576	0.300394	0.384159	0.434191	0.388395	0.267281	1.5651	1.03161	0.925314	0.973442	0.950937	0.984909	0.915198	1	1	1	1	1	1	1
cg22764341	0.465904	0.00368051	0.937565	0.000368015	0.504009	0.712774	0.00704918	0.758157	1.18621	0.860676	0.774778	0.861706	1.06817	2.17862	1	0.80235	1	0.0916357	1	1	1
cg23248865	0.792912	0.903034	0.233759	0.87846	0.312359	0.192887	0.159396	1.04694	1.00566	0.970986	0.986216	1.04933	0.928792	1.05209	1	1	1	1	1	1	1
cg23265096	0.423905	0.0601127	0.0156681	0.00132212	0.058397	0.00524816	0.60063	0.94095	1.14745	1.04926	0.787771	0.848539	1.35994	1.08227	1	1	1	0.317308	1	1	1
cg23427565	0.448266	0.120799	0.352404	0.138681	0.693791	0.315857	0.550178	0.914746	1.05848	1.01376	0.913898	0.967162	0.962265	1.1774	1	1	1	1	1	1	1
cg23446109	0.689674	0.000204763	0.200124	8.14114e-05	0.0833717	0.219484	0.0468037	0.82942	1.09374	0.849701	0.797278	0.946152	1.17349	2.06886	1	0.0520099	1	0.0217368	1	1	1
cg23667933	0.987951	0.00195755	0.204917	0.700607	0.943926	0.719984	0.492801	0.951036	1.13017	0.950108	0.968833	1.04444	0.950141	0.971414	1	0.442407	1	1	1	1	1
cg23687319	0.500659	0.259679	0.391882	0.773897	0.693791	0.117893	0.883908	1.07874	1.00389	0.948045	0.974712	1.06167	1.17756	0.954647	1	1	1	1	1	1	1
cg23779331	0.415491	0.280095	0.00775415	0.329089	0.0934826	0.215522	0.286889	0.917399	1.05618	0.790349	0.936492	1.05269	1.11336	1.81902	1	1	1	1	1	1	1
cg23829949	0.000914144	2.85535e-11	0.141781	2.2279e-08	0.897964	0.476992	0.0107895	0.682117	1.4677	0.958056	0.666358	0.992653	0.855181	1.38871	0.324521	9.76529e-09	1	7.24067e-06	1	1	1
cg23886755	0.452642	0.211392	0.616453	0.872447	0.0236385	0.978519	0.16198	1.0056	1.00182	1.00031	0.999432	0.989855	1.00069	1.0088	1	1	1	1	1	1	1
cg23964386	0.83935	0.0152343	0.0755991	7.02036e-11	0.00463518	0.0975962	0.000342906	0.907348	1.18883	0.869396	0.464542	1.34931	1.42309	1.69839	1	1	1	2.47117e-08	1	1	0.104586
cg24088639	0.458511	0.176671	0.489876	0.533433	0.177688	0.727166	0.232793	1.02064	1.05414	1.00124	1.00771	0.952541	0.922843	0.975518	1	1	1	1	1	1	1
cg24127989	0.0465737	9.22146e-06	0.335977	7.09002e-09	0.655222	0.63981	0.370414	0.792105	1.30764	0.951061	0.56964	1.04884	1.31203	1.495	1	0.00256357	1	2.36098e-06	1	1	1
cg24206256	0.908643	0.032215	0.309032	0.280278	0.731892	0.271455	0.010665	0.824336	1.18242	0.803554	0.956975	0.837429	0.741635	2.20507	1	1	1	1	1	1	1
cg24333473	0.423905	0.805712	0.464279	0.941909	0.261137	0.141535	0.229366	1.20698	0.958106	0.960563	0.928532	1.11787	1.15682	0.929756	1	1	1	1	1	1	1
cg24355174	0.717395	0.614353	0.0807504	0.380157	0.616611	0.982223	0.0129669	1.00599	0.980178	0.932735	0.943519	1.00987	0.986326	1.43567	1	1	1	1	1	1	1
cg24382521	0.54445	0.216753	0.478417	3.95079e-05	0.540711	0.178855	0.00032786	0.981307	1.01783	0.989219	0.956856	1.00371	1.03966	1.08349	1	1	1	0.0109042	1	1	0.100325
cg24448259	0.401684	0.0068779	0.000867125	0.000896407	0.000275311	0.63981	0.000120538	0.340715	0.875916	0.336272	0.429423	3.21074	1.36149	3.74588	1	1	0.278347	0.217827	0.0927798	1	0.0379693
cg24474998	0.461461	0.00210088	0.0642357	0.0288553	0.693791	0.437782	0.0655031	0.878908	1.12316	0.905592	0.918632	1.22283	0.877394	1.08822	1	0.472698	1	1	1	1	1
cg24496666	0.257641	1.26911e-09	0.00738031	0.0449989	0.961206	0.0400946	0.0607434	0.724447	1.61744	0.733979	0.733914	0.808274	0.645115	2.43769	1	4.13729e-07	1	1	1	1	1
cg24523000	0.829546	0.141115	0.0522415	0.456935	0.897964	0.0656633	0.000159892	1.07929	0.974722	0.853892	0.934622	1.04222	1.29557	1.46544	1	1	1	1	1	1	0.0495666
cg24651706	0.384154	0.88182	0.384278	0.00197335	0.340412	0.755546	0.129791	0.631695	1.10755	1.03736	0.557255	1.1996	1.05698	1.69407	1	1	1	0.459791	1	1	1
cg24674703	0.715773	1.0184e-08	0.0332233	2.4353e-11	0.0516439	0.654457	0.0395278	0.976554	1.30722	1.03734	0.647912	0.882364	1.09076	1.23761	1	3.19779e-06	1	8.62095e-09	1	1	1
cg24686224	0.954518	0.170297	0.681881	0.00669645	0.468445	0.49044	0.481654	0.980182	1.08394	1.02267	0.859017	1.02552	1.15174	0.930594	1	1	1	1	1	1	1
cg24938727	0.126504	2.10877e-09	0.162146	3.94842e-10	0.237961	0.135974	0.000403828	0.883639	1.3605	1.00593	0.596509	0.913237	0.91204	1.54131	1	6.79025e-07	1	1.37405e-07	1	1	0.121956
cg25059792	0.251624	1.59507e-05	0.0693874	3.86355e-06	0.655222	0.712774	0.0573709	0.87262	1.27745	0.912199	0.823405	1.01894	1.12437	1.15187	1	0.00435454	1	0.00113202	1	1	1
cg25092328	0.587889	0.762957	0.402162	0.998177	0.0236385	0.882034	0.910963	0.777319	1.02768	0.828756	0.811229	1.01043	0.87954	2.45896	1	1	1	1	1	1	1
cg25355065	0.208049	0.139578	0.0188059	0.907122	0.616611	0.921358	0.303268	1.04765	1.17245	0.921044	0.9291	1.00479	1.22808	0.889097	1	1	1	1	1	1	1
cg25416363	0.400319	0.00585291	0.999179	0.120825	0.838495	0.189301	0.817676	1.08917	1.23468	0.972812	0.902484	0.968951	0.849321	0.903954	1	1	1	1	1	1	1
cg25420952	0.162553	0.000148867	0.19233	9.73713e-08	0.540711	0.698282	0.0379667	0.890573	1.21826	1.01654	0.709858	1.01927	1.09011	1.16539	1	0.0379611	1	3.10614e-05	1	1	1
cg25423576	0.20293	2.50622e-08	1.33396e-05	1.55437e-06	2.32734e-05	0.127967	1.50833e-09	0.44315	1.14161	0.43147	0.326732	2.14456	0.683045	4.87383	1	7.71916e-06	0.00458882	0.000472529	0.00798279	1	5.3244e-07
cg25432323	0.0480913	0.00102913	0.932503	0.182646	0.922798	0.841603	0.624708	0.868555	1.11082	0.999224	0.904931	0.957341	1.24867	0.998823	1	0.243904	1	1	1	1	1
cg25470175	0.676542	0.176671	0.847834	0.00554512	0.401377	0.62518	0.465166	1.01347	0.989907	0.914671	0.844189	0.94608	0.99461	1.85942	1	1	1	1	1	1	1
cg25483839	0.889506	0.0349545	0.0194531	0.342335	0.504009	0.847681	4.24443e-06	0.77568	0.940696	0.632294	0.708459	1.32223	1.01447	3.41104	1	1	1	1	1	1	0.00141764
cg25494064	0.610744	0.0612576	0.213101	0.108552	0.769052	0.705538	0.11138	0.997823	1.00776	0.998054	0.990659	0.998209	1.00623	1.01211	1	1	1	1	1	1	1
cg25653103	0.542862	0.455743	0.781865	0.214184	0.804763	0.0718604	0.639814	1.0884	1.04029	0.998872	1.01069	0.984769	0.862462	0.936115	1	1	1	1	1	1	1
cg25799433	0.0161007	2.27016e-10	0.000130502	3.02982e-06	0.769052	0.0163648	2.9909e-07	0.787878	1.45748	0.772717	0.62393	0.913496	1.5847	1.89455	1	7.60502e-08	0.0435876	0.000902888	1	1	0.000103485
cg25836159	0.397596	0.47016	0.0392876	0.0308978	0.693791	0.974321	0.561936	1.01973	1.03506	1.02736	0.936962	1.01409	0.996966	0.927161	1	1	1	1	1	1	1
cg25898500	0.602562	0.58849	0.801911	0.954165	0.838495	0.476992	0.00482113	1.02959	1.02806	1.00445	1.00155	1.00249	0.952505	0.919806	1	1	1	1	1	1	1
cg25927124	0.768354	0.00800065	0.983817	0.244391	0.804763	0.300525	0.594637	1.07455	1.07833	0.986724	0.98536	0.952078	0.957208	0.96044	1	1	1	1	1	1	1
cg26024206	0.986724	0.259679	0.239151	0.000368015	0.804763	0.182285	0.851077	0.955605	1.05763	1.05962	0.853891	1.01441	0.904047	1.07566	1	1	1	0.0916357	1	1	1
cg26136776	0.470368	0.000625095	0.151689	1.02146e-07	0.943926	0.0243004	9.34397e-05	0.964239	1.12372	0.977884	0.817813	0.986631	1.13441	1.209	1	0.153148	1	3.24823e-05	1	1	0.0297138
cg26145103	0.471861	0.0715445	0.1268	0.00875036	0.731892	0.835434	0.00539017	0.793098	1.09716	0.793119	0.82324	1.1125	1.13592	1.99626	1	1	1	1	1	1	1
cg26185508	0.268946	0.00424503	0.117206	2.95522e-07	0.237961	0.240129	0.000181043	0.859413	1.16173	0.978825	0.745779	1.07059	1.0989	1.27054	1	0.916927	1	9.24983e-05	1	1	0.0559423
cg26261431	0.741533	0.000277327	0.672545	0.0304794	0.838495	0.0734851	0.153079	1.0085	1.10915	0.970432	0.893274	0.95419	0.821576	1.32419	1	0.0690543	1	1	1	1	1
cg26301908	0.53969	2.17763e-06	0.180351	0.00355289	0.312359	0.755546	0.762086	1.04903	1.19929	0.89766	0.807285	1.04992	0.938285	1.34361	1	0.000618448	1	0.792294	1	1	1
cg26357241	0.369696	0.0125344	0.669429	0.799638	0.0741977	0.57439	0.676099	0.950364	1.11043	0.965741	0.958364	0.933277	1.12388	1.05824	1	1	1	1	1	1	1
cg26411702	0.115868	3.083e-05	0.00232284	0.0318577	0.984599	0.0391312	0.00175494	0.814095	1.25516	0.645802	0.641988	0.798373	0.620229	4.20844	1	0.00826244	0.72008	1	1	1	0.501912
cg26512148	0.192984	0.000139871	0.00191761	0.0858135	0.21636	0.0441578	0.00275265	0.85971	1.10208	0.792022	0.845541	1.03494	0.831661	2.2558	1	0.035807	0.598295	1	1	1	0.781753
cg26538349	0.847576	0.000103191	0.669429	0.00186373	0.401377	0.62518	0.340212	0.958021	1.16294	0.992172	0.859238	1.00542	0.951548	1.06194	1	0.0267264	1	0.437976	1	1	1
cg26581729	0.905398	0.0612576	3.37714e-06	0.259407	0.0054319	0.691006	5.84036e-05	1.01796	1.01318	1.29312	0.898471	0.755487	1.10523	0.585184	1	1	0.00117187	1	1	1	0.0186892
cg26609631	0.113725	1.85186e-08	0.00965883	0.00183925	0.00863241	0.000449463	0.0169789	1.07963	0.885344	0.92463	0.97108	1.14863	1.21298	1.15724	1	5.7778e-06	1	0.434063	1	0.157762	1
cg26616347	0.162553	1.23612e-05	0.469908	1.30773e-09	0.434191	0.0935052	0.0191642	0.8434	1.21066	0.937134	0.691027	1.08333	1.21925	1.38304	1	0.00341169	1	4.48552e-07	1	1	1
cg26635603	0.99937	0.861871	0.597859	0.766389	0.655222	0.952242	0.949612	0.988748	1.02258	1.04323	0.956258	0.956481	0.998064	0.979	1	1	1	1	1	1	1
cg26702875	0.735133	0.0227281	0.821339	0.000124518	0.00463518	0.101835	0.860817	1.01576	1.11266	0.936482	0.777239	1.15457	0.865376	1.34773	1	1	1	0.0326238	1	1	1
cg26757722	0.374913	0.0127256	0.619561	0.0633925	0.897964	0.588809	0.732924	0.901673	1.1703	1.00032	0.875524	1.04388	0.873374	1.00966	1	1	1	1	1	1	1
cg26788215	0.0657721	0.325677	0.818605	0.2713	0.504009	0.135974	0.116264	1.14848	1.02159	0.991778	0.982283	1.03411	0.946545	0.87652	1	1	1	1	1	1	1
cg26791905	0.578154	0.00134284	0.102546	0.0432742	0.340412	0.099697	0.225977	0.630534	1.09868	0.684305	0.626745	1.48102	1.7374	2.15539	1	0.312882	1	1	1	1	1
cg26824091	0.168313	0.0331064	0.409977	0.335668	0.731892	0.504061	0.498419	0.79641	1.16047	0.923354	0.894942	1.06595	0.926511	1.30306	1	1	1	1	1	1	1
cg26853640	0.932463	0.737875	0.0292304	0.00208893	0.0934826	0.00213382	2.09514e-06	1.01018	0.967909	0.779883	0.620595	1.20368	1.67369	2.19439	1	1	1	0.482543	1	0.731902	0.000708159
cg26872564	0.229519	2.05262e-05	0.271507	0.00352318	0.285951	0.331721	0.13759	0.822351	1.1762	1.00605	0.863734	0.945045	0.992166	1.16742	1	0.00554208	1	0.789193	1	1	1
cg26952662	0.744721	9.69356e-07	0.638244	0.0147101	0.943926	0.0802988	0.633768	0.676907	1.87754	0.748753	0.537891	1.15003	0.621435	1.78353	1	0.000282083	1	1	1	1	1
cg26989531	0.789885	0.0282627	0.0667692	0.229472	0.616611	0.985459	0.0143587	0.949175	1.12405	0.925247	0.944449	0.927237	1.00155	1.32121	1	1	1	1	1	1	1
cg27061947	0.641968	0.000463554	0.450357	0.815678	0.578335	0.223501	0.934318	0.935844	1.07936	0.991046	0.977214	1.00947	0.963189	0.971407	1	0.114034	1	1	1	1	1
cg27141427	0.24767	0.119445	0.68499	0.441111	0.21636	0.418858	0.853538	1.05878	1.10258	0.954298	0.971093	0.936399	1.0296	1.0569	1	1	1	1	1	1	1
cg27194921	0.689674	0.890548	0.226712	0.885791	0.0401363	0.531784	0.764961	0.826202	1.02979	0.927527	0.891288	0.738061	1.11116	2.09469	1	1	1	1	1	1	1
cg27236973	0.862201	2.82219e-13	0.0134736	5.03496e-06	0.0934826	0.531784	0.0568247	0.931219	2.09331	0.93782	0.590567	0.785393	0.781256	0.763447	1	9.84943e-11	1	0.00146517	1	1	1
cg27368011	0.907568	0.92214	0.591685	0.456049	0.991404	0.74851	0.957652	0.996375	0.994089	0.988907	0.937008	0.962199	1.43649	0.980725	1	1	1	1	1	1	1
cg27440002	0.513017	1.3505e-06	0.0179729	0.000713239	0.237961	0.365032	0.0951794	0.927692	1.0748	0.984231	0.922112	1.03731	1.02726	1.05141	1	0.000388944	1	0.17403	1	1	1
cg27626299	0.429569	0.000792392	1.62573e-05	0.000552276	7.60355e-06	0.691006	7.58762e-07	0.862001	0.911441	0.534412	0.662666	2.02615	0.897138	2.94643	1	0.191759	0.00555999	0.135308	0.00262323	1	0.000257979
cg27637521	0.1495	5.30439e-09	0.214768	0.0461815	0.961206	0.0030245	0.331258	1.12996	0.802566	1.06843	1.03821	0.991467	1.22839	0.878522	1	1.67619e-06	1	1	1	1	1
cg27662379	0.583016	0.889115	0.235546	0.757871	0.177688	0.444193	0.257862	1.07809	0.976304	1.022	0.995867	1.00674	0.92578	0.955044	1	1	1	1	1	1	1
