# Supplementary material for: Molecular subtypes based on DNA methylation predict prognosis in colon adenocarcinoma patients
Source: Aging (Albany NY). 2019 Dec 18;11(24):11880–92. doi: 10.18632/aging.102492 (PMC6949097; doi:10.18632/aging.102492)
Supplement: Supplementary Table 11 [file aging-11-102492-s001..xlsx]

## Sheet: Supplementary Table 11
						Supplementary Table 11. The 36 cluster-specific methylation sites.
	Cluster_p1	Cluster_p2	Cluster_p3	Cluster_p4	Cluster_p5	Cluster_p6	Cluster_p7	Cluster_FC1	Cluster_FC2	Cluster_FC3	Cluster_FC4	Cluster_FC5	Cluster_FC6	Cluster_FC7	Cluster_p1	Cluster_p2	Cluster_p3	Cluster_p4	Cluster_p5	Cluster_p6	Cluster_p7	Status
cg06385087	cg06385087	0.62387	2.25414e-07	0.0554536	0.0311089	0.804763	0.276153	0.311698	0.711983	1.52683	0.54177	0.535536	1.07418	0.892252	3.75729	1	6.78498e-05	1	1	1	1	1	C2_H
cg19779211	cg19779211	0.405797	1.51533e-10	0.014961	0.000296362	0.21636	0.925697	0.967056	0.841781	1.65546	0.815872	0.738494	0.995174	1.07048	1.13111	1	5.10667e-08	1	0.0743867	1	1	1	C2_H
cg22176895	cg22176895	0.768354	2.79726e-10	0.0192352	0.00160318	0.922798	0.0533676	0.29705	0.8552	1.88177	0.829204	0.66993	1.0164	0.645312	1.09094	1	9.34286e-08	1	0.379953	1	1	1	C2_H
cg24496666	cg24496666	0.257641	1.26911e-09	0.00738031	0.0449989	0.961206	0.0400946	0.0607434	0.724447	1.61744	0.733979	0.733914	0.808274	0.645115	2.43769	1	4.13729e-07	1	1	1	1	1	C2_H
cg26952662	cg26952662	0.744721	9.69356e-07	0.638244	0.0147101	0.943926	0.0802988	0.633768	0.676907	1.87754	0.748753	0.537891	1.15003	0.621435	1.78353	1	0.000282083	1	1	1	1	1	C2_H
cg22175764	cg22175764	0.00102501	0.00275315	1.28797e-09	0.000501844	7.60725e-13	0.0627397	6.51966e-08	1.98781	0.732951	0.434366	0.549168	2.3874	1.59289	2.276	0.362854	0.613953	4.54654e-07	0.123454	2.70818e-10	1	2.26232e-05	C3_L
cg27626299	cg27626299	0.429569	0.000792392	1.62573e-05	0.000552276	7.60355e-06	0.691006	7.58762e-07	0.862001	0.911441	0.534412	0.662666	2.02615	0.897138	2.94643	1	0.191759	0.00555999	0.135308	0.00262323	1	0.000257979	C3_L
cg02196655	cg02196655	0.605832	3.04267e-06	0.394437	1.5241e-09	0.434191	0.0802988	0.776372	0.856141	1.37937	1.04992	0.479434	1.03021	1.40936	1.12365	1	0.000858034	1	5.21241e-07	1	1	1	C4_L
cg03763616	cg03763616	0.377539	6.00731e-07	0.0268094	1.88572e-06	0.058397	0.00792199	0.495606	0.687359	1.2661	0.722941	0.560485	1.49263	2.15512	1.38824	1	0.000177216	1	0.000569487	1	1	1	C4_L
cg03944089	cg03944089	0.339379	0.00996057	0.298261	2.66445e-06	0.0833717	0.0485741	0.010665	0.793382	1.0789	0.89886	0.594581	1.29006	1.56829	1.54818	1	1	1	0.000796669	1	1	1	C4_L
cg06117855	cg06117855	0.428149	0.582556	0.209798	2.30472e-05	0.370096	0.0627397	0.000122458	0.84406	1.01615	1.06311	0.511335	0.841386	1.69141	1.98763	1	1	1	0.00649931	1	1	0.0383293	C4_L
cg07173760	cg07173760	0.113725	1.67428e-07	0.00119046	8.64347e-09	0.578335	0.182285	9.04914e-05	0.861018	1.39856	0.86278	0.642898	1.07282	1.27058	1.39276	1	5.08981e-05	0.379755	2.8437e-06	1	1	0.0288668	C4_L
cg07293947	cg07293947	0.171994	3.53546e-09	0.00361131	4.99395e-07	0.261137	0.998832	0.000732754	0.731385	1.29865	0.767144	0.60137	1.08526	0.906933	2.59924	1	1.12428e-06	1	0.000155811	1	1	0.21543	C4_L
cg07509155	cg07509155	0.422496	2.18038e-11	0.0222452	4.47843e-10	0.104598	0.822833	0.0596008	0.907727	1.366	0.892222	0.619689	1.1916	0.867907	1.42959	1	7.4787e-09	1	1.55402e-07	1	1	1	C4_L
cg09244244	cg09244244	0.181864	0.00548357	0.326824	1.92118e-06	0.468445	0.113106	0.00131914	0.76369	1.17124	0.904022	0.6054	1.06147	1.50742	1.76771	1	1	1	0.000578274	1	1	0.382551	C4_L
cg10451565	cg10451565	0.422496	0.0943186	0.0122647	5.68238e-09	0.00741284	0.000842658	0.000152582	1.07615	1.09307	0.932657	0.655951	1.12648	1.37384	1.37114	1	1	1	1.9036e-06	1	0.29156	0.0474529	C4_L
cg12582008	cg12582008	0.000827233	6.36313e-12	0.0693874	7.09002e-09	0.21636	0.734316	6.80696e-06	0.496385	1.69925	1.00829	0.511334	0.824616	0.907737	1.62366	0.294495	2.18892e-09	1	2.36098e-06	1	1	0.00226672	C4_L
cg13796218	cg13796218	0.150833	6.29361e-08	0.0183852	1.56672e-07	0.0934826	0.00769616	0.0148517	0.707934	1.43921	0.816123	0.634642	1.04538	0.661061	2.20909	1	1.92584e-05	1	4.9665e-05	1	1	1	C4_L
cg20247048	cg20247048	0.867365	7.18975e-06	0.00155691	9.72792e-11	0.011633	0.437782	0.518303	0.932405	1.37888	1.0691	0.584968	0.765273	1.21388	1.31814	1	0.00201313	0.490426	3.4145e-08	1	1	1	C4_L
cg21481775	cg21481775	0.113725	0.00361884	0.000327073	6.63922e-07	1.13821e-06	0.203963	2.24698e-05	1.54485	0.980824	0.62467	0.449453	2.13736	0.750466	2.13163	1	0.796146	0.10728	0.00020648	0.000397235	1	0.00728021	C4_L
cg23829949	cg23829949	0.000914144	2.85535e-11	0.141781	2.2279e-08	0.897964	0.476992	0.0107895	0.682117	1.4677	0.958056	0.666358	0.992653	0.855181	1.38871	0.324521	9.76529e-09	1	7.24067e-06	1	1	1	C4_L
cg23964386	cg23964386	0.83935	0.0152343	0.0755991	7.02036e-11	0.00463518	0.0975962	0.000342906	0.907348	1.18883	0.869396	0.464542	1.34931	1.42309	1.69839	1	1	1	2.47117e-08	1	1	0.104586	C4_L
cg24127989	cg24127989	0.0465737	9.22146e-06	0.335977	7.09002e-09	0.655222	0.63981	0.370414	0.792105	1.30764	0.951061	0.56964	1.04884	1.31203	1.495	1	0.00256357	1	2.36098e-06	1	1	1	C4_L
cg24674703	cg24674703	0.715773	1.0184e-08	0.0332233	2.4353e-11	0.0516439	0.654457	0.0395278	0.976554	1.30722	1.03734	0.647912	0.882364	1.09076	1.23761	1	3.19779e-06	1	8.62095e-09	1	1	1	C4_L
cg24938727	cg24938727	0.126504	2.10877e-09	0.162146	3.94842e-10	0.237961	0.135974	0.000403828	0.883639	1.3605	1.00593	0.596509	0.913237	0.91204	1.54131	1	6.79025e-07	1	1.37405e-07	1	1	0.121956	C4_L
cg00221494	cg00221494	0.407174	1.99065e-08	2.99376e-08	1.18627e-06	7.29976e-09	0.192887	0.00342826	0.665483	1.2331	0.53505	0.437019	2.6316	0.820707	2.13356	1	6.17101e-06	1.0538e-05	0.000365373	2.59142e-06	1	0.966769	C5_H
cg12242338	cg12242338	0.233255	7.71068e-10	0.239151	1.5406e-05	1.19699e-05	0.0400946	0.492801	0.860671	1.37352	1.06656	0.759903	0.655412	1.34249	1.06182	1	2.54453e-07	1	0.00442152	0.00411765	1	1	C5_L
cg04633513	cg04633513	0.919037	0.301593	0.189278	0.0283637	0.961206	0.882034	1.40851e-05	0.716032	1.03589	0.668599	0.783661	0.898539	0.877317	3.80765	1	1	1	1	1	1	0.0046199	C7_H
cg04941721	cg04941721	0.181864	1.17978e-05	0.00119046	0.0189892	0.104598	0.253193	2.09694e-08	0.596708	1.08446	0.493593	0.545506	0.972736	1.55723	5.25069	1	0.003268	0.379755	1	1	1	7.31834e-06	C7_H
cg07148914	cg07148914	0.822414	0.121481	0.00143116	0.0281691	0.00120821	0.400415	1.22292e-09	0.671613	0.735299	0.562688	0.584791	1.32102	2.13366	4.17544	1	1	0.453679	1	0.398708	1	4.32914e-07	C7_H
cg09712527	cg09712527	0.558817	0.488495	0.384278	0.085307	0.104598	0.10848	1.26803e-05	0.464695	0.603035	0.548978	0.430723	1.61256	0.541411	6.89265	1	1	1	1	1	1	0.0041845	C7_H
cg09773756	cg09773756	0.780727	0.252322	0.000905772	0.00941867	6.7592e-05	0.0290549	5.50643e-08	0.557091	0.711442	0.267058	0.317819	2.80572	0.297105	7.45581	1	1	0.289847	1	0.0229137	1	1.91624e-05	C7_H
cg17860158	cg17860158	0.0084476	0.00484797	0.0130082	0.000494663	0.0205996	0.871007	2.13494e-06	0.539967	1.19694	0.791876	0.693634	1.28626	1.20996	1.9905	1	1	1	0.122182	1	1	0.000719475	C7_H
cg20195812	cg20195812	0.998668	0.135794	0.00342593	0.0732159	0.943926	0.162457	1.27874e-06	0.71833	0.866554	0.628689	0.634117	1.01511	1.04359	4.76873	1	1	1	1	1	1	0.000433493	C7_H
cg25483839	cg25483839	0.889506	0.0349545	0.0194531	0.342335	0.504009	0.847681	4.24443e-06	0.77568	0.940696	0.632294	0.708459	1.32223	1.01447	3.41104	1	1	1	1	1	1	0.00141764	C7_H
cg26853640	cg26853640	0.932463	0.737875	0.0292304	0.00208893	0.0934826	0.00213382	2.09514e-06	1.01018	0.967909	0.779883	0.620595	1.20368	1.67369	2.19439	1	1	1	0.482543	1	0.731902	0.000708159	C7_H
